# Supplementary material for: Gene Expression over Time during Cell Transformation Due to Non-Genotoxic Carcinogen Treatment of Bhas 42 Cells
Source: MDPI journal article supplement (doi:10.3390/ijms23063216), 2022-03-16
Supplement: s1 [file s1]

Gene Expression Over Time During Cell Transformation Due to Non-Genotoxic Carcinogen Treatment of Bhas 42 Cells

Kiyomi Ohmori <sup>1, 2,\*</sup>, Asuka Kamei <sup>3</sup>, Yuki Watanabe <sup>4</sup> and Keiko Abe <sup>3,5</sup>

- <sup>1</sup> Chemical Division, Kanagawa Prefectural Institute of Public Health, Chigasaki 2530087, Kanagawa, Japan
- <sup>2</sup> Research Initiatives and Promotion Organization, Yokohama National University, Yokohama 2408501, Kanagawa, Japan
- <sup>3</sup> Group for Food Functionality Assessment, Kanagawa Institute of Industrial Science and Technology, Kawasaki 2100821, Kanagawa , Japan; kamei@kistec.jp
- <sup>4</sup> Health and Anti-Aging Project, Kanagawa Academy of Science and Technology, Kawasaki 2130012, Kanagawa, Japan; onuki.yuki0205@mail.u-tokyo.ac.jp
- <sup>5</sup> Department of Applied Biological Chemistry, Graduate School of Agricultural and Life Sciences, The University of Tokyo, Bunkyo-ku 1138657, Tokyo, Japan; aka7308@mail.ecc.u-tokyo.ac.jp
- \* Correspondence: ohmori.n4yf@pref.kanagawa.lg.jp or ohmori-kiyomi-kz@ynu.ac.jp; Tel./Fax: +81-046-783-4400 or +81-045-339-4448

Table of contents

| Page  | Content                                                                                                                             | Page    | Content                                                               |
|-------|-------------------------------------------------------------------------------------------------------------------------------------|---------|-----------------------------------------------------------------------|
| 2     | Figure S1. Hierarchical clustering analysis                                                                                         | 65-66   | Figure S30. DNA methylation and transcriptional repression signaling  |
| 3     | Table S2. Number of up- and down-regulated genes                                                                                    | 67      | Table S31. DNA methylation                                            |
| 4-5   | Table S3-1. Gene symbol of Ben diagram FDR<0.05 Up-regulated                                                                        | 68      | Figure S32. Glutamyl cycle                                            |
| 6-7   | Table S3-2. Gene symbol of Ben diagram FDR<0.05 Down-regulated                                                                      | 69      | Table S33. Gene expression variation associated with cytochromes P450 |
| 8-9   | Figure S4. Gene Ontology terms for selected genes. GO terms down-regulated due to TPA treatment for 1 h, 6 h, 24 h, and 8 days (C). | 70-71   | Figure S34. Prostanoid biosynthesis at 1 h                            |
| 10-11 | Figure S5. ILK signaling at 1 h                                                                                                     | 72-73   | Figure S35. Hippo signaling at 1 h                                    |
| 12-14 | Figure S6. Molecular mechanism of cancer at 1 h                                                                                     | 74-75   | Figure S36. HIPPO signaling at 6 h                                    |
| 15-16 | Figure S7. TNFR signaling                                                                                                           | 76-77   | Figure S37. Prostanoid biosynthesis at 6 h                            |
| 17-18 | Figure S8. mTOR signaling at 1 h                                                                                                    | 78-79   | Figure S38. Apoptosis signaling at 6 h                                |
| 19-20 | Figure S9. NRF2-mediated oxidative stress response                                                                                  | 80-81   | Figure S39. Gap junction signaling at 6 h                             |
| 21-23 | Figure S10. Xenobiotic metabolism signaling                                                                                         | 82-83   | Figure S40. IL-2 signaling at 6 h                                     |
| 24-25 | Figure S11. Integrin signaling at 1 h                                                                                               | 84-85   | Figure S41. Interferon signaling at 6 h                               |
| 26-29 | Figure S12. Axonal guidance signaling at 6 h                                                                                        | 86-87   | Figure S42. PD-1, PD-L1 cancer immunotherapy pathway                  |
| 30-31 | Figure S13. ILK signaling at 6 h                                                                                                    | 88-89   | Figure S43. Integrin signaling at 6 h                                 |
| 32-34 | Figure S14. Molecular mechanism of cancer at 6 h                                                                                    | 90-93   | Figure S44. Aryl hydrocarbon receptor signaling at 6 h                |
| 35-36 | Figure S15. IL-6 signaling at 6 h                                                                                                   | 94-95   | Figure S45. Glioma invasiveness signaling at 6 h                      |
| 37-38 | Figure S16. Cell cycle control of chromosomal replication at 6 h                                                                    | 96-97   | Figure S46. Gap junction signaling at 24 h                            |
| 39-40 | Figure S17. IL-1 signaling at 6 h                                                                                                   | 98-99   | Figure S47. Apoptosis signaling at 24 h                               |
| 41-42 | Figure S18. JAK/stat signaling at 6 h                                                                                               | 100-101 | Figure S48. Cell cycle. G1/S checkpoint regulation at 24 h            |
| 43-44 | Figure S19. Cell cycle control of chromosomal replication at 24 h                                                                   | 102-103 | Figure S49. Cell cycle. G2/M DNA damage checkpoint regulation at 24 h |
| 45-46 | Figure S20. Mismatch repair in eukaryotes at 24 h                                                                                   | 104-105 | Figure S50. VEGF signaling at 24 h                                    |
| 47-48 | Figure S21. Role of BRCA1 in DNA damage response at 24 h                                                                            | 106-107 | Figure S51. mTOR signaling at 24 h                                    |
| 49-50 | Figure S22. Hereditary breast cancer signaling at 24 h                                                                              | 108-109 | Figure S52. Telomerase signaling at 24 h                              |
| 51-52 | Figure S23. Mitotic roles of polo-like kinase at 24 h                                                                               | 110-114 | Figure S53. Mitochondrial dysfunction at 24 h                         |
| 53-54 | Figure S24. Role of CHK proteins in cell cycle checkpoint control at 24 h                                                           | 115-116 | Figure S54. Glioma invasiveness signaling at 24 h                     |
| 55-56 | Figure S25. GADD45 signaling at 24 h                                                                                                | 117-118 | Figure S55. Prostanoid Biosynthesis at 24 h and 8 days                |
| 57-58 | Figure S26. Estrogen-mediated S-phase entry at 24 h                                                                                 | 119     | Figure S56. SOX9 gene expression                                      |
| 59-60 | Figure S27. RAN signaling at 24 h                                                                                                   | 120-122 | Figure S57. Molecular mechanism of cancer at 24 h                     |
| 61-62 | Figure S28. Sumoylation pathway at 24 h                                                                                             | 123-125 | Figure S58. Molecular mechanism of cancer at 8 days                   |
| 63-64 | Figure S29. p53 signaling at 8 days                                                                                                 | 126     | Figure S59. Legend of Figure 8                                        |

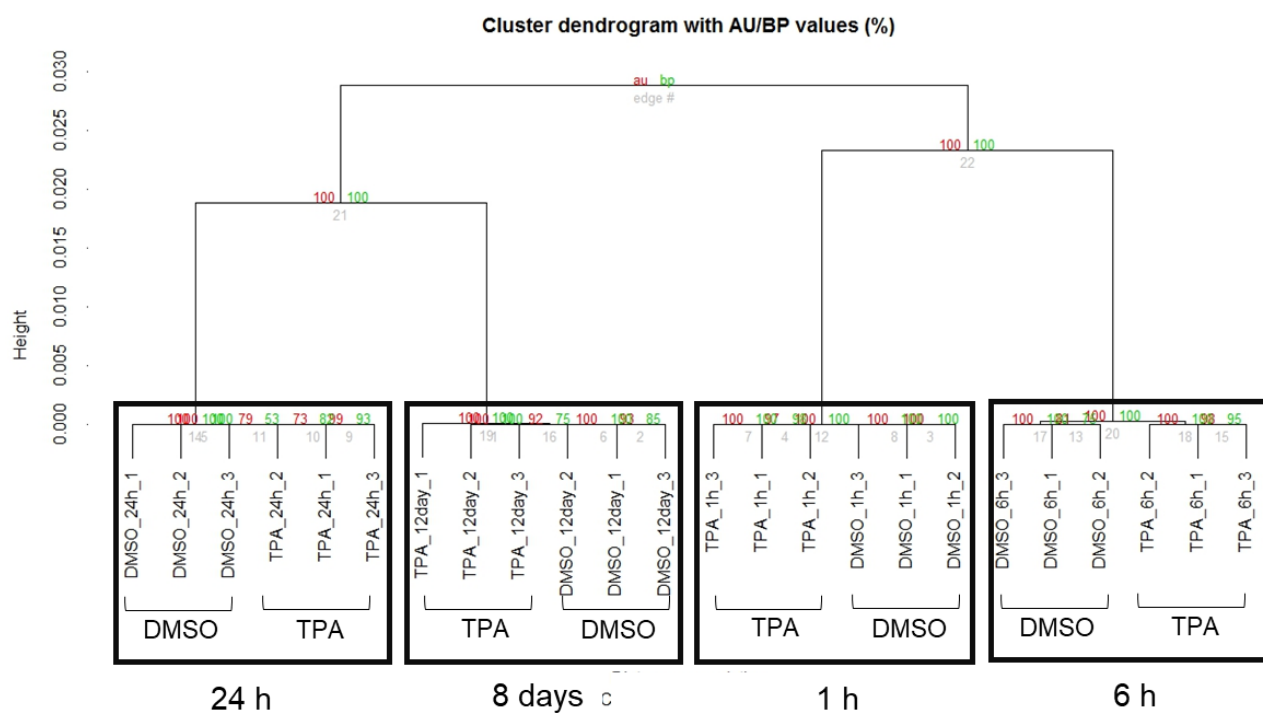

Figure S1. Hierarchical clustering analysis

Table S2. Number of up- and down-regulated genes

| Processing time | Up-regulated | Down-regulated |
|-----------------|--------------|----------------|
| 1 h             | 324 (538)    | 527 (766)      |
| 6 h             | 763 (1211)   | 785 (1183)     |
| 24 h            | 784 (1039)   | 663 (931)      |
| 8 days          | 418 (595)    | 673 (983)      |

( ): probe sets

Table S3-1. Gene symbol of Ben diagram FDR<0.05 Up-regulated

| Treatment time                    | Gene                                                                                                                                                                                                                                                                                                                                                                                                                                                                                                                                                                                                                                                                                                                                                                                                                                                                                                                                                                                                                                                                                                                                                                                                                                                                                                                                                                                                                                                                                                                                                                                                                                                                                                                                                                                                                                                                                                                                        |
|-----------------------------------|---------------------------------------------------------------------------------------------------------------------------------------------------------------------------------------------------------------------------------------------------------------------------------------------------------------------------------------------------------------------------------------------------------------------------------------------------------------------------------------------------------------------------------------------------------------------------------------------------------------------------------------------------------------------------------------------------------------------------------------------------------------------------------------------------------------------------------------------------------------------------------------------------------------------------------------------------------------------------------------------------------------------------------------------------------------------------------------------------------------------------------------------------------------------------------------------------------------------------------------------------------------------------------------------------------------------------------------------------------------------------------------------------------------------------------------------------------------------------------------------------------------------------------------------------------------------------------------------------------------------------------------------------------------------------------------------------------------------------------------------------------------------------------------------------------------------------------------------------------------------------------------------------------------------------------------------|
| 1 hour & 6 hour & 24 hour & 8 day | <b>A</b> Angptl4, Hmga1//Hmga1-rs1, Rbm3, Zwint, Mpp6, Slpi, Hmga2                                                                                                                                                                                                                                                                                                                                                                                                                                                                                                                                                                                                                                                                                                                                                                                                                                                                                                                                                                                                                                                                                                                                                                                                                                                                                                                                                                                                                                                                                                                                                                                                                                                                                                                                                                                                                                                                          |
| 1 hour & 6 hour & 24 hour         | <b>B</b> Slc20a1, Cxcl11, Slc25a33, Mapk6, Spred2                                                                                                                                                                                                                                                                                                                                                                                                                                                                                                                                                                                                                                                                                                                                                                                                                                                                                                                                                                                                                                                                                                                                                                                                                                                                                                                                                                                                                                                                                                                                                                                                                                                                                                                                                                                                                                                                                           |
| 1 hour & 6 hour & 8 day           | <b>C</b> Bcl6, Trib1, 1810011O10Rik, Gla                                                                                                                                                                                                                                                                                                                                                                                                                                                                                                                                                                                                                                                                                                                                                                                                                                                                                                                                                                                                                                                                                                                                                                                                                                                                                                                                                                                                                                                                                                                                                                                                                                                                                                                                                                                                                                                                                                    |
| 1 hour & 24 hour & 8 day          | <b>D</b> Timp1, Aurka, Cdt1                                                                                                                                                                                                                                                                                                                                                                                                                                                                                                                                                                                                                                                                                                                                                                                                                                                                                                                                                                                                                                                                                                                                                                                                                                                                                                                                                                                                                                                                                                                                                                                                                                                                                                                                                                                                                                                                                                                 |
| 6 hour & 24 hour & 8 day          | <b>E</b> Ngef, Plk3f5, Mtm1, Ptkg2, 2310002L13Rik, Cabpd, Hivep3, Tnfrsf22//Tnfrsf23, Il13ra1, Skil                                                                                                                                                                                                                                                                                                                                                                                                                                                                                                                                                                                                                                                                                                                                                                                                                                                                                                                                                                                                                                                                                                                                                                                                                                                                                                                                                                                                                                                                                                                                                                                                                                                                                                                                                                                                                                         |
| 1 hour & 6 hour                   | <b>F</b> Eya1, Ermp1, Cdkn1a, Krt16, Btg2, Dab2, Lhfp12, Efna1, Trp53inp1, Mt1, Top1, Vps18, Flcn, Nfat5, Vegfa, Rsad2, Dnm3os, Sply2, Piges, Sat1, Ankrd57, Sema4c, Psme4, Arl5b, Gabarapl1, Rab43, Egr2, Ddit4, 2410042D21Rik, Tgfb1, Plat, 1500032P08Rik, Bhlhe40, Tgfb1, Hes1, Sqstm1, Purg, Srxn1, Cald1, Egr3, Vps37b, Socst1, Artdc3, Foxc2, Cong2, Zland2a, Dpp7, Sox9, Zfp217, Slc4a7, Adam8, 9530028C05, Smcr8, Atp6v1h, 9930031P18Rik, Kdm6b, 1700023H06Rik, Kdm3a, Irf3, Sema4b, Zfp36, Pnrc1, Hmox1, Bag3, Ndfip2, Stx3, Oaf, Bcl2l1, Nkfb2, Trnf9, Zswim6, Lpin1, Jun, Jmjd1c, BC022e87, Traf1, B230031A22Rik, Impact, Irf2bp2, Dusp4, Tob2, D4Wsu53e, Nfe2l2, Ctbs, Ancy12                                                                                                                                                                                                                                                                                                                                                                                                                                                                                                                                                                                                                                                                                                                                                                                                                                                                                                                                                                                                                                                                                                                                                                                                                                                   |
| 1 hour & 24 hour                  | <b>G</b> Birc6, Zfp367, Gas2l3, E330016A19Rik, Cxcl10, Dnajb1, Gm16516, Gclc, Hmnpab, Chac1, Irfd1, Eif4e                                                                                                                                                                                                                                                                                                                                                                                                                                                                                                                                                                                                                                                                                                                                                                                                                                                                                                                                                                                                                                                                                                                                                                                                                                                                                                                                                                                                                                                                                                                                                                                                                                                                                                                                                                                                                                   |
| 1 hour & 8 day                    | <b>H</b> Cenpl, Fam83d, Ccnf, Klfrc1//LOC100044746, Junb, Nkfbz                                                                                                                                                                                                                                                                                                                                                                                                                                                                                                                                                                                                                                                                                                                                                                                                                                                                                                                                                                                                                                                                                                                                                                                                                                                                                                                                                                                                                                                                                                                                                                                                                                                                                                                                                                                                                                                                             |
| 6 hour & 24 hour                  | <b>I</b> Scd2, Slk, Ppm11, Dpy191, AU018778, Pipla, Ero1f, Expi, Pvr, Arl4c//LOC632433, Mgp                                                                                                                                                                                                                                                                                                                                                                                                                                                                                                                                                                                                                                                                                                                                                                                                                                                                                                                                                                                                                                                                                                                                                                                                                                                                                                                                                                                                                                                                                                                                                                                                                                                                                                                                                                                                                                                 |
| 6 hour & 8 day                    | <b>J</b> Fam19a5, Nav3, Tbx3, Gprc5b, Cytip, Klf5, Gdnf, Foxf2, Tnfrsf22, Bcl3, 6430527G18Rik, Btc, 4930523C07Rik, Plkg, Pcdh7, Tnfrsf23, Anxa8, Tnm2, Tgfb, Igf2bp2, Rnf150, Casp4, Gstt4, Nm1, Fmn3, Tes                                                                                                                                                                                                                                                                                                                                                                                                                                                                                                                                                                                                                                                                                                                                                                                                                                                                                                                                                                                                                                                                                                                                                                                                                                                                                                                                                                                                                                                                                                                                                                                                                                                                                                                                  |
| 24 hour & 8 day                   | <b>K</b> Irfd2, Nup50, Fam60a, Sl5, Lmnb2, Neg1, Ctps, Mito4, Utp20, Gm11428, Tagln2, Ddx21, Ppa1, Ccl7, Trmt61a, Apex1, Rcl1, Foxm1, Pp1r14b, LOC100046344//Nmef1, Ddx39, Prr11, Gwdd1, Espl1, Hmgb3, Cdcas, Ipo5, Lrrc59, D17H6S56E-5, Gar1, Taf1d, Dlk2, Ldlr, Tacc3, Steap1, Hells, Bcat1, Racgap1, Man2a1, Timeless, Wdr77, Sl3ga5, Npp56, Rcc2, Lsm2, Serpina3g, Cad, Nup93, Suv39h2, 2700038G22Rik, Tf12, Gas5//Snord47, Banf1, Ccnb1//Gm5593//Gm8416, Gpr176, Ncc4l, Nucks1, Shb, Xpo5, Spc24, LOC100047155//Snrpa1, Shmt2, Cdk1, Mcm10, Cdc47, Stip1, Gpr137b//Gpr137b-ps//LOC100044979, Plk1, Lrp8, 4933413G19Rik//Foxm1//Pebp1, Cycs//Gm10053, Fam3c, Cdc20, Nubp1, Fkbp4, 2610019E17Rik, Mhld1, Dnm11, Ahrap22, Fabp5//Gm6166, Il1r1f, Tdkh, LOC100046166//Tbrg4, Gins1, Spag5, Cdkn2apnl, Gm5529//Slc25a5, Polr1a, Dlymk, Fabp5, Snhg1, Mcm6, Nhp2, Dph5, LOC100045677//Mcm3, Uhrf1, Ddx11, Osmr, Sfrs2, Rangap1, Col8a1, Ccd3, Akr1b3, Runx1, Pdsst, Aurkb, Ppib, Aimp2, Ccn4//LOC100047134, Siglecg, Fosl1, 2610002D18Rik, lns1abp, Apitd1, Snhg3, Ppan, Cks1b, Rras2, Mcm2, Masp1, Eif5a, Chek1, Uck2, Lyar, Cp, Vars, Cdc6, Ncapd2, Matr3, Pfas, Ccl2, Rpl2, Rnasch2a, Pola1, Gja1, Umpps, Heatr1, Gmn, Cep55, Cdcas, Klf22, Ap10a, Rcc1, Asf1b, LOC100045833//Lly6c1//Lly6c2, Tyms//Tyms-ps, Mcm4, Snrpa1, BC055324, Ccna2, Nasp, Wisp2, Cdc47, Gart, Klf11, Nolc1, Klf12, Mcm7, Aspm, Ccdc86, Fbl, Exo1, Cdc34//LOC100046898, LOC100047340//Rcc2, Ube2s, Sephs2, Orc1l, Psmd13, Pdgfc, Dusp9, 1700029F09Rik, Timm8a1, Mcm5, Has2, Rpl2, Birc5, Klf23, Plkm2, Tmem97, Psme3, Prl2c2//Prl2c3//Prl2c4, Steap2, Anxa3, Fcrt2, Polr1b, Farp1, Fdps, Dctd                                                                                                                                                                                                                                                                      |
| 1 hour                            | <b>L</b> Abi2, LOC100046186//Ramp3, Ugcpr, AB041803, Bsc12, LOC269472, Rnf213, D430033H22Rik, Taf7, Balaip2, Nrp1, Bbc3, Mbd5, Ier2, Itis6, Spag9, Klf10, Nkfbia, Sbbp2, Rbbp6, Mcall1, C330019G07Rik, Slit2, C130039O16Rik, 4833441D16Rik, Mcl1, Mnt, Ptptr, Chka, Narf, Igm2, Rab11b, Mospd2, Hexim1, Mysm1, 1700109H08Rik, Pim3, BC049807, Usp32, Seid1b, Ndel1, Mael21bp, Fos, 1200015M12Rik//A130040M12Rik//E430024C06Rik, Pp1r15a, Fam133b, Sertad1, Rbm43, Nab2, Insig1, Mx2, Dusp1, S100a10, 2900011L18Rik, Myip, Sertad3, Trim25, Gdap10, Klf16, 130004C03, Irf1, Cyp1a1, LOC100270747, B430007K19Rik, Cks2, Whsc11, Ml2, 4921513D23Rik, Zc3hav11, 5031426D15Rik, G2e3, Lpar2, Mxd1, Irs1, Cebpb, Dppa5a, Nipbl, Iigp1, 1810013L24Rik, LOC72520, Csrmp1, Tra2b, Zfp656, Fam196a, Ctlar, 6330564D18Rik, Rtp4, Gm14446, Ipo7, Plekhm2, Mdh, Emilin2, Mepce, Zfp52, D8Erd56e, Rrad, Tcfap2a, 1190002F15Rik, 5830469G19Rik, Piga, Fosb, D13Erd787e, Pdccl7, Fzd2, Myn, Dclk1, Il11, 9930017N22Rik, C330016O10Rik, Hic2, Sec24a, Sna11, Rbm16, Gm2213//Gm8801//LOC677319//Ppp1r10, 67204O3M19Rik, Rapgef6, Bach2, 12000031O10Rik//1200015M12Rik//A130040M12Rik, Pramef8, Nab1, Pext1, P14kb, Tmem55b, 2310016C08Rik, E130006N16Rik, Trim39, Trpm7, C77027, Tefr2, Cdc42ep4, AU018740, Cyp1b1, Ahnak2, 1700056N10Rik, Tiparp, Saps3, Klf4, 2410131K14Rik, Klf11, Med13, Tll3, Ipkc, Acs11, A930017K11Rik, Fcrrm3, Axbn2//LOC100047323, Lcorl, Rnf169, Prkd2, 933011F22Rik, Trex1, C80258, Pcf11, 2510017J16Rik, Egr1, D5Erd121e, D5Wsu152e, Fam55c, Tmem140, Dusp2, Igf1r, Gm8801//LOC677319//Ppp1r10, A845619, Ick, LOC74457, H2afx, Pttg1, Ddit3, D230019N24Rik, Per1, Dnajc1, 2210402A03Rik, Bdr2, B930069K11Rik, Taf5, Zcchc11, 2610020C07Rik, Mdm2, Spry3, Ndufa12, Hist1h1c, Gpcpd1, Ckl1, Ttp2, C530014P21Rik, LOC230334L07Rik, Ddhnd1, Cdk12, Gsp1r, Hjurp, Dnajb9, Depdc5, Mat2a, Mli3, Ctlc, Nudt7, Kcnq1ot1, D5Erd798e, Itsn2 |
| 8 day                             | <b>O</b> Cdcas, Myh1, Ep400, Fmn1, 2610034E01Rik, Tmem194, Foxp1, Cyp7b1, 2700094K13Rik, Gpr137b, Nkain1, Gm7788, Nek6, Wt11, Rnasch2c, Mamdc2, Pnpt1, Tmem183a, Chf1, Ly6e, Gpr137b//LOC100044979, Trim37, Klf20a, Idl1, Dcaf7, Pop1, Casp12, Baz1a, Cclat1, Cclat1//Cclca2, Opa3, Bnc2, Ptkfb3, Diras2, Fam64a, 0610012H03Rik, Klf2c//LOC631653, Gpr137b//Gpr137b-ps, Lce1h, Hspa8//LOC624853//LOC641192, Gclm, Whsc1, Ccnb1, Gise1, Hey1, Erap1, Apol6, Serpina3n, Akr1c18, Als2cr12, Lcn2, Cstf2, Slc15a2, Klf18b, Cacna1a, Gadd45g, Thg1f, Minpp1, Mvd, Shnd2, 2010317E24Rik, Gm8300, Usp12, Apobec1, Txn1, Gbp2, Ada, Il33, Gapdh//Gm10358//Gm2076//Gm2308//LOC10004498//LOC100045908//LOC100047352//LOC100048329, Fafp4, Sox5, Fdft1, Saas3, Hivep3//LOC1000045240, 2610318N02Rik, Tubb3, BC005512//F630007L15Rik//Gm6958, Hegt1, Car13, Ampd3, Cda, Plekho1, Mett7b, Gm12816//Gm5879//Rpl3, Pkp3, Fam110a, Klf18a, Ly75, Phex, Lrrc4c, 2810004O08Rik, AA763515, Cyp5561, Fosl2//LOC634417, Rasal2, D2Erd750e, Wdr18, Megf6, Pde1a, Ube2cbp, 1810009A15Rik, Sqle, Med1, Acs3, Lbp, Nf5dc2, Depdc1b, Dcps, Rtkn2, Susd1, Gm7040//Pr12c1//Pr12c2//Pr12c3//Pr12c4//Pr12c5, Rabif, 9630033F20Rik, Ccl8, Ccnb2, Soccs3, Lce11, Baalc, Anp32e, Fam54a, 2610036L11Rik, Podxl, Cipl4, A630023A22Rik, Slpq, Rtelr1, Rbm38, Ch13f1, Plf1, Cclat1, Lzic, Shroom3, 4931408D14Rik, Msh, Acp12, Gsdmrc2//Gsdmrc4, Ube2t, Ccnb1//Gm4870//Gm5593//Gm8416//LOC635091, Orai2, Nek2, Pcdh19, Bubb1, BC048355, Ubqln4, Troap, Cpeb3, Tirap, Hp, BB287469//Eif1a//Gm2022//Gm5039//Gm5662//Gm6804//LOC641136, Sap30, Ly6a, 2810025M15Rik, LOC100046998//Opa1, Rbm14, Fgl23, Ccdc123, Stard4, Gpr137b-ps, Cenpa, Ifi204, Ubd, Gcn2t, Dhcr24, Pim1, Cyt5b, Cdk2ap1//LOC100047490, Pmepa1, Ilf15, Trnf510, Slxn5, Nav1, Actr3b, Slamf8, Fam164a                                                                                                               |



Table S3-1. Gene symbol of Ben diagram FDR<0.05 Up-regulated (continued)

| Treatment time | Gene                                                                                                                                                                                                                                                                                                                                                                                                                                                                                                                                                                                                                                                                                                                                                                                                                                                                                                                                                                                                                                                                                                                                                                                                                                                                                                                                                                                                                                                                                                                                                                                                                                                                                                                                                                                                                                                                                                                                                                                                                                                                                                                                                                                                                                                                                                                                                                                                                                                                                                                                                                                                                                                                                                                                                                                                                                                                                                                                                                                                                                                                                                                                                                                                                                                                                                                                                                                                                                                                                                                                                                                                                                                                                                                                                                                                                                                                                                                                                                                                                                                                                                                                                                                                                                                                                                                                                                                                                                                                                                                                                                                                                                                                                                                                                                                                                                                                                                                                                                                                                                                                                                 |
|----------------|------------------------------------------------------------------------------------------------------------------------------------------------------------------------------------------------------------------------------------------------------------------------------------------------------------------------------------------------------------------------------------------------------------------------------------------------------------------------------------------------------------------------------------------------------------------------------------------------------------------------------------------------------------------------------------------------------------------------------------------------------------------------------------------------------------------------------------------------------------------------------------------------------------------------------------------------------------------------------------------------------------------------------------------------------------------------------------------------------------------------------------------------------------------------------------------------------------------------------------------------------------------------------------------------------------------------------------------------------------------------------------------------------------------------------------------------------------------------------------------------------------------------------------------------------------------------------------------------------------------------------------------------------------------------------------------------------------------------------------------------------------------------------------------------------------------------------------------------------------------------------------------------------------------------------------------------------------------------------------------------------------------------------------------------------------------------------------------------------------------------------------------------------------------------------------------------------------------------------------------------------------------------------------------------------------------------------------------------------------------------------------------------------------------------------------------------------------------------------------------------------------------------------------------------------------------------------------------------------------------------------------------------------------------------------------------------------------------------------------------------------------------------------------------------------------------------------------------------------------------------------------------------------------------------------------------------------------------------------------------------------------------------------------------------------------------------------------------------------------------------------------------------------------------------------------------------------------------------------------------------------------------------------------------------------------------------------------------------------------------------------------------------------------------------------------------------------------------------------------------------------------------------------------------------------------------------------------------------------------------------------------------------------------------------------------------------------------------------------------------------------------------------------------------------------------------------------------------------------------------------------------------------------------------------------------------------------------------------------------------------------------------------------------------------------------------------------------------------------------------------------------------------------------------------------------------------------------------------------------------------------------------------------------------------------------------------------------------------------------------------------------------------------------------------------------------------------------------------------------------------------------------------------------------------------------------------------------------------------------------------------------------------------------------------------------------------------------------------------------------------------------------------------------------------------------------------------------------------------------------------------------------------------------------------------------------------------------------------------------------------------------------------------------------------------------------------------------------------------|
| 6 hour         | Btbc3, Frrs1//LOC100046401, Plin3, Vps26a, Tapbp1, Abcd4, Fam117a, Rhob, Dusp6, Tmem158, Pde10a, Bcr, Steap3, BC030336, Ggct, Ndrig1, Myo1b, Gad1, Kik7, Synpo, A930001N09Rik, Pqlc2, Tmed8, Mex3b, C79505, Dcn, Rtkn, Tcf4, Ppp4r2, Sox4, Step2, Rnh1, Abhd1, Atp6v1d, Stk40, Khlh2, Ttc39c, Mpz11, Khlh21, Sod2, Rtkb3, Bdkrb1, Mafg, Tmem65, Etv3, Smurf1, Map1lc3b, Adam19//LOC100045780, Hs1bp3, Ccl5, Cstb, Atp2b1, Trps1, Lrrc8d, Ar18b, Smox, Cdc42se1, Casp9, Adam17, Cep170, Pxdn, Jag1, Agpat9, Vgll4, Fam117b, Sgms2, Slc7a2, 1600029D21Rik, Tor3a, Smtn, LOC100047565//Mmd, Tnfai6p, Gm10397, Ccln5, Chic2, Ankrk37, Itga6, Tspan5, C3, Zfp703, Dusp16, Rgs17, Ggylf2, E130112L2Rik, Ptdl, Cdk20, Gsto2, Raso2, Vasn, Mndal, Pde1b, Serpinb8, Apeap2, Adams7, Litaef, Fgfr1//LOC100046239, Cpeb4, C230081A13Rik, Pla2gp7, Btg1//LOC100047353, Mpa21, Robo1, Fmrdd4, Nkrl, Msd11, Chmp14, Bacth1, Il2rg, Apeh, Nrip1, Tjp2, Snapc1, Kif3c, Parp8, Tgfb3, 1110018J18Rik, Reep3, Zfp326, Ypel5, Stxbp5, Tnfrsf1b, Fbxo11, Otud7b, Fyb, D8Erd82e, 2610110G12Rik, Runx2, Rhdh10, Dlgap4, Brwd3, Gna14, Aoc7, Ecm1, Ado, Procr, Igbp4, LOC100048460//Lzts2, Tyh2, Anxa7, Ktna1, Spred1, Purb, Stam2, Slc5a10, Pgm2, Afp112, Map3k11, Atp7a, Pwll4, Polr3g, Socs5, Tmc6, Stam, Slc6a8, Nfkfbie, Ifit3, Tanc2, Adams4, Akr1b8, Rassi8, Samd5, Cpt1a, Rb1, Ragapac2, Phidat1, Tspan14, Nav2, Zdhhc18, Neut1, Fbxo33, Afr1, Picld1, Crmp1, Cyp2l6, Fam53b, Jak2, Dsp, Capn5, Col18a1, Rsr1, Foxs1, Usp27x, Stard3, Ctsl, Plxnd1, Ercr1, Ssf2a, Hdac5, Cdkn2b, 9630019E01Rik, Sdcbb, Rnf149, Btg1, Hipr1, Akrp13, Akrp13, Evl2a, Ccl5a3, Zfp239, Atrx, Ctns, Ostrn1, Avl9, Csnk1g3, Ifl203, Synj2, Tspan12, Ifl205//Mhda, Ehnd3, Endod1, Socst7, Anob6, Spib, Neof1, Atp6v0d1, Mras, Acfnk2d, Plscr1, Kllk8, Gramd1a, Ccdc88a, Pdpn, H60a, Fam126a, Mmp9, Arhgef2, Trib2, Serac1, Tob1, Fam20c, Fyn, Vart1, Fam63a, Slc41a2, 2610035D17Rik, Fgfr1op, Ppard, Frip2, Khlh24, Casp3, Apev0b, Mmd, Fu8, Spry4, Fgpt, Pfkp, LOC100046168//Ndlp1, Grasp, Acsbg1, Stx6, Camnsap11, Tnfai6p, LOC100044115//Rin2, Mfsc9, St3gal1, Plxnb1, Slc27a1, Gdpd5, Wwtr1, Slc22a4, Pgdsk1, Cyth2, Etlv5, Enk1, C1gal1, Ltpb3, Ypel2, Mapkbp1, Trim47, Fndc3a, Tubb2a, Slfn2, Ptpre, Hivep1, Abbb2, Ilfr12, Ptipj, Dip2c, Cdk17, Npc1, Pxn, Zcche4, Lpgat1, Skk1, Ttc39b, Mapk4, Alox5ap, Ogt, Ralgsd, Anrx2, Nnma2, Stom, Gnpda1, Hsd3b7, Osbp8, Acox1, 523040M03Rik, Obfc1, Map3k4, Apgai4, Slc11a1, Tsc22d1, Mwi1, Abcc4, Fchs2d, Megf10, Stxbp3a, Slc23a2, Mei2a, S1pr2, Capg, Emilin1, Spred3, Dmp1, Tollip, Atp6v1c1, Scd1, Trim8, Bcl10, Ar18a, Tmcc2, Sdc1, Prkx, Mx, Renbp, P4k2b, Dytk3, Rc3h1, Mmp10, 5330426P16Rik, Np2, Dagla, Tmem55a, Mmp13, Cmtm6, Glis, Sin3b, Ereg, Rab27b, Tmem2, Mmr11, Rab32, 2700078E11Rik, Cblb, Gas7, Tnfai2p, Bnip3, Sh3pxd2a, Ankrd12, Pcdhb17, Ppp25a, Tead4, Spon2, Neat1, Cic, Pel12, Ly96, Kik6, Dock5, Myo10, Cd300b, Trp53inp2, Ceacam1//Ceacam2, Etv4, Fgfr1, 1500031L02Rik, Il1rap, Hs6st1//LOC100047280, Zland5, Znr1, Tll5, 3110043021Rik, Sltk, Gopd1, Gsta1//Gsta2, Aebp2, Ifl203//Ifi204//Ifi205//LOC640890//Mhda//Mhda1, Trio, Nfatc1, Znr2, 4930402H24Rik, Hpk2c, Zfp238, Ralb, Slc43a2, Ifr2, Lyp1a2, Akinr1, Eda2r, Gna13, 5730559C18Rik, Snx16, Rhoq, Upp1, Nedd9, Hbp1, Tmbim1, Itga5, Tle3, Ceacam1, Hspb8, Zswim4, Epn2, Elfh2, Zeb1, Wwp2, Col17a1, Pgd, Pcmtd1, Angpt12, Dennd2a, Wipf1, Icam1, Tmem201, Sema6d, Mex3c, Gjb4, Chst11, Rap1b, Armcx1, Mospd1, Mex3d, Dgkd, Tsc1, Mrc1, Aqp3, Slc24a6, Inpp5f, LOC640502//Uap1, Cdf164, Csrp2, Klf13, Pias4, Jhdm1d, Dusp5, Cgref1, Tacc2, Zc3h12c, Sh3pxd2b, Foxc1, Mblac2, Plin4, Rsaat1, Ahr, Ptpn12, Slc36a1, 9030420J04Rik, Slfn4, Cd44, LOC100045795//Rsbn1, Rnf11, Mobk14a, Tllr7, Tgm2, Gramd4, Ets2, Rar1a, D030041H20Rik, Trim13, Gfod1, D930015E06Rik, Krt6a, Arhgef12, Abcb1a, B630005N14Rik, Tshz1, Esd, Pdp1, 0610031J06Rik, Appb2, Pdgfrb, Amtl, Mmp14a, Mpz, Zsta2, Abr, Pold4, Ino80c, Reb1, Jarid2, Ptpm, Uap111, Hsd17b11, Acvr1, Dnajb4, Thbs2, Tnp1, Efna4, Smaad3, Slpa12, Chml, Cmtm3//LOC100046883, Sh3g3, Sesn3, Gm16515, Furin, Spbs1, Slc39a14, Wbp2, Sestd1, LOC100047588//Mark3, Schp1, Fam129b, Gm10307//Ppax, LOC14210, Samd8, Nap4k3, Arhgap17, Flrt3, Iflra, Gramd1b, 2210008F06Rik, Abca5, Trak2, 6330577E15Rik, Arhgef3, Plbd2, Ing1, Rc3h2, Fam69a, Caprin2, Inpp1, Slc2a1, Gpc1, Ezr, Dync1l1, Lrig1, Ifng2, Atp6v1b2, Cttbnp2n1, Relb, Dhps, Slc25a37, A607873, Syne2, Rnf19b, Wst4, Ixrl, Fam176a, Myo1e, Mgat5, Rab31, Inhba, Ml5, Fndc3b, Kcnnd4, Cdr9, Ern1, Gm22, 4732423E21Rik, Seinc5, Il18rap, Fam100b, Igsf3, Cld1d1, Eaf1, Pip4k2c, Hivep2, Gsto2, Gsta1, Klrh1a, 5031439G07Rik, C330006P03Rik//Homer1, Serpinb2, Zfp608, Itgb3, Parvb, Tnc, Asap2, Phdb1, Chic1, Spire1, BC028528, Pik3cd, Clic1, Slc23, Sema7a, Pad2, Abhd5, Srx11, Slaf5a, Ank, Mx1, Dnm13a, Sgfb, Enpp2, Gm8615//Gnpda1, Map2k6, Slcgal1, Uhrf1bp1f1, Slc41a1, Tspan11, Acvr1b, Cxc7f, Clock, Frip1, Leprotll1, Mfsl1, 290006B418Rik, 5830408B19Rik, Zlc3h1, Rfxank, Sept9, C76876 |
| 24 hour        | Dhnx9, Sirm1, Ruvbl2, 8430406107Rik, Dnajc21, Wdr33, Rlf1, Rbm10, Strap, Cenpn, Hat1, Parp1, Stat2, Cenph, Tpx2, Sh3kbp1, Pspb, Sdad1, Nufi2, Plcxd2, Lsg1, Rad54l, Bop1, Hdgf, Imnt, Dntip2, Ka12a, Dis3, Gm7669//Gm7901//Gm9347//Phgdh, Tmed2, Bbx, Utrn, Elf4e2, Tript13, Pole3, Wdr75, Cdk6, Tubb6, Ewsr1, Topbp1, Asap1, Prpf4, Exosc1, Toerg1, Lpp, Rad23a, 4922501C03Rik, Dtl, E130303B06Rik, Glee, Fhl1, Fus, Gbr1, Hbegf, Elf3c, Atad5, Mre11a, Etfud2, Polr2h, Mbd3, Malat1, Myc, Gm5256//Gm5529//Slc25a5, Prmt1, Gins3, Fgfr7, C1qbp, Gm9790//Higd1a//LOC100045763, Cggbp1, Shmt1, Hsp90b1, Nudc, Dnajc5, Ndula2f, Cdc25a, H2-Ke2, Tpm3, Elf2s1, Tomm40, Cctf6a, Pold2, LOC100046672//Wars, Scarb1, Polr3e, 1810029B16Rik, Plaur, Trp53, Rfc4, Prpf40a, Rnf168, Gm10171//Timm23, Casc5, Myst3, Fignl1, Fancd2, Mefm, Acat2//Acat3, Ran, Glib1, Brp16, Eri1, Usp39, Klf7, Rad51, Prpf19, Idh3a, Rangrf, Pnn, Aic, Hspa4, Tbl3, Polr1e, Nup133, Gm6742//Gm7993//Gm9115//LOC677259//Odc1, Stxn2, Tmpo, Elf3a, Clspn, Mhfd1f1, Pola2, Qrrt1, Gm5081//Prps1, Eno1, Gars, Gof1, Csf1, Phf10, E2f8, Smc6, Hspa1b, Ebna1bp2, Aars//Exosc6, Mett10d, Ndula4f, Ifl3, Gjc1, Igap3, 2210411K11Rik, Cvc1, Cntf//Zfp91-Cntf, Ung, Ssb, Ccnd1, Car6, Tmem48, Usp36, Xccc6, Zwilch, Eif1ad, F730047E07Rik, Nsun2, Naa38, Ncl, Uxs1, Mfr1p, Exosc7, Rrp1, Thrapp3, Gm6742//Gm7450//Gm7993//Gm9115//Odc1, Pbk, Ldha, Dnajc2, Ligt, Chaf1b, Msh6, Nkrf, Seid8, Hsa6, P4ha1, Cdc2a, Timm9, Hsd17b12, Nup85, Ttc27, Gm10043//Gm2926//Lsm6, Cest1, Prim1, Elf6, Galk1, Rrm2, Lamc1, LOC100047619//Slc7a5, Bclaf1, Dkc1, Ddx46, Fanca, Gtf22, Synchron, Krl1, Wdhdl1, Abcd1, Nduf19, Nrm, Sgol1, Rfc3, Dynll2, Mki67ip, Sigmart, Pwp2, Farsa, Farsb, Cbx5, Azin1, Luc71, Ptpnb, Wdr12, Ddx56, Snpb, Il6, Nup205, Cctf7, Eef1e1, Kpna3, D19Bwg1357e, LOC639633//Npm3//Npm3-ps1, Eif1a, Skp2, Ppil5, Wbp11, Tcf19, Akhnb2, Cyes, Mobklb3, Cdc4c, Cyb5b, Ciapin1, Dut, Ddx18, Htra2, Wdr36, Plk4, Sfrs13a, Chchd4, Nsl1, Phf15, Nars, Exosc5, Cdc45, Eps8, Ppat, Pgp, Gm7901//Gm8096//Gm8341//Gm9252//Phgdh, Iars, Kntc1, Rad18, Ncbp1, Slc25a5, Gm11276//Hst1h2ad//Hst1h2ao, Naf1, Prmt3, Thoc4, Wdr43, Rrp15, Rfc1, Dna2, Ltpb1, Fam111a, Dctpp1, Haus1, Rfc5, Wisp1, Rsl1d1, Ube2c, Tomm70a, Tk1, Taf4b, Tardbp, Cth, Mybbp1a, Tnfrsf12a, Aatf, Erd1r, Fndc4, Nop16, Abce1, Pcnra, Fam195a, Gcn1l1, Snpd1, Chd4, Alad//LOC100046072, Thyn1, Nip7, Gm10333//Gm10349//Nufi2, Yrdc, Naa50, Etf1, Hspa14, Trmt6, Klf20b, Slc20a2, Gins2, Usp1, Znhi16, Set, Pno1, Ddx10, Hsphi1, Nup62, Bzw1, Eif2b3, Cdc101//LOC100047712, Prps1, 6430706D22Rik//Hjurp, Tllf1, Top2a, Gsda, 1300001I01Rik, Clip1, Nup43, Tsr1, Pycr2, Gstcd, Delap1, Fls3, Zc3h15, Clns1a, Gsg2, Tmm59, Ddah1, Traip, Cenpi, Lamb1-1, Gadd45a, Cse11, Nop2, Reco4a, S100a3, Bysl, Pank3, Cklf, LOC100047009//Pus7, Einb2, Uggc, Pdg4, Exosc2, Ube2g2, Magi3, Diap3, Kras, Ddx27, Trim49, Ddah1, Gtbbp4, 1110034A24Rik, Ergic1, Mecr, Loxla, 28104717H13Rik, Rsrc2, Nhp211, Pole2, Nomo1, Mrlp9, Fkbp5, Orc21, Suv39h1, Hars, Snpd3, Fancb, Dhfr, Klf2a, Eif4g1, Eif3b, 2610507B11Rik, Tm4sf1, E2f7, Sfln9, Pus1, Baz1b, Aqp1, Zfp428, Rpl41, Smarcc1, Mphosph10, Eps8//LOC632638, 311008217Rik, Wdr46, Ppil1, Cov3, Setd5, Ccne2, Sfla3, Taf9, Pkmyt1, Aacs, Phb, Supt16h, Aen, Eme1, Pkrar2a, Ndl9, Cdc7, Slc35a3, Atad3a, Gemin5, Gemin6, Pgk1, Abcf1, Lbr, Dsccl, Mettl6, Gm11847//Gm6793//Hnrpa33//LOC100045099, Otud4, Mars, Olai1, Pole, Rpat1, Eno1//Gm5506//Gm5855, Txnip, Fbxo5, Kpnb1, Nup160, Gm3223//Nudc//Nude-ps1, Prim2, Pold1, Rae1, Smc1a, Nudt21, Exosc8, Gnz2, Pprc1, Klhdc4, Uchl3//Uchl4, Xpot, Gas5, LOC100048559//Sfrs1, Prep, Prmt7, Nol11, Pwp1, Ctu2, Cdk14, Mek16, Me2, Orc6l, Ehdk, Rrp9, Asep7, Smpm7, Sumpo3, Sae1, Ankrd1, Dck, Mhfd2, Erfh, Myo1c, Psmc5, Ifl2, Hnrrpr, Rrs1, Atad2, Pges3, Spop, Pgam1, Hspd1, Nup54, Rbl1, Phgdh, Rad51ap1, Hiri3p, Cars, Nup107, Gpatc4, Brcat1, Uchl5, Ptpb1, Utp18, Ltv1, LOC100047481//Sec24b, Tfpd1, 281040811Rik, Pak1ip1, Safb2, Nap111, Rpa2, Nop58, Zfp91, Ggta1, Refbp2//Thoc4, Cnfr18, Ncapg, Ctnn, Mybl2, Pcgf6, Ints7, Ccne1, Smc2, Tcof1, Noc21, Wdr74, Bzw2, Adsl, Gnl3, Fen1, Ckap4, Sflb32, Ccdc99, Ubf1, Enoph1, Ranbp1, Macrd1, Slc19a1, 463243411Rik, Coro1c, Arip1//LOC100047005, Hnmpu, Sscca1, Rrm1, Pkp4, Cisd1, Incerp, Tubg1, Wars, Zmynd19, Hnmr1, LOC630729, Hsp90aa1, Slc16a1, Ssrp1, Slc25a30, Chd1, Dcaf15, Mpl22, Tssc4, Nuf2, Amd1, Cnpl12, Elovf6, Mad2l1, Srm, Sart3, Mtbp, Tpin, Megobh, Trib3                                                                                                                                                                                                                                                                                                                                                                                                                                                                                                                                                |



Table S3-2. Gene symbol of Ben diagram FDR<0.05 Down-regulated (continued)

| Treatment time | Gene                                                                                                                                                                                                                                                                                                                                                                                                                                                                                                                                                                                                                                                                                                                                                                                                                                                                                                                                                                                                                                                                                                                                                                                                                                                                                                                                                                                                                                                                                                                                                                                                                                                                                                                                                                                                                                                                                                                                                                                                                                                                                                                                                                                                                                                                                                                                                                                                                                                                                                                                                                                                                                                                                                                                                                                                                                                                                                                                                                                                                                                                                                                                                                                                                                                                                                                                                                                                                                                                                                                                                                                                                                                                                                                                                                                                                                                                                                                                                                                                                                                                                                                                                                                                                                              |
|----------------|---------------------------------------------------------------------------------------------------------------------------------------------------------------------------------------------------------------------------------------------------------------------------------------------------------------------------------------------------------------------------------------------------------------------------------------------------------------------------------------------------------------------------------------------------------------------------------------------------------------------------------------------------------------------------------------------------------------------------------------------------------------------------------------------------------------------------------------------------------------------------------------------------------------------------------------------------------------------------------------------------------------------------------------------------------------------------------------------------------------------------------------------------------------------------------------------------------------------------------------------------------------------------------------------------------------------------------------------------------------------------------------------------------------------------------------------------------------------------------------------------------------------------------------------------------------------------------------------------------------------------------------------------------------------------------------------------------------------------------------------------------------------------------------------------------------------------------------------------------------------------------------------------------------------------------------------------------------------------------------------------------------------------------------------------------------------------------------------------------------------------------------------------------------------------------------------------------------------------------------------------------------------------------------------------------------------------------------------------------------------------------------------------------------------------------------------------------------------------------------------------------------------------------------------------------------------------------------------------------------------------------------------------------------------------------------------------------------------------------------------------------------------------------------------------------------------------------------------------------------------------------------------------------------------------------------------------------------------------------------------------------------------------------------------------------------------------------------------------------------------------------------------------------------------------------------------------------------------------------------------------------------------------------------------------------------------------------------------------------------------------------------------------------------------------------------------------------------------------------------------------------------------------------------------------------------------------------------------------------------------------------------------------------------------------------------------------------------------------------------------------------------------------------------------------------------------------------------------------------------------------------------------------------------------------------------------------------------------------------------------------------------------------------------------------------------------------------------------------------------------------------------------------------------------------------------------------------------------------------------------------|
| 6 hour         | <p>Mimr10, Cd3eap, Ifrd2, 8430406107Rik, Pkia, Bcl7a, Cenpn, Papr1, Cenph, Nsg1, Rad54l, Chstf12, Ebf3, Slc39a13, Snx24, Tcfap4, LOC1000048247, Pole3, Meirml, Cdon, Accn2, Topbp1, Chek2, Ly6e, Mdc1, Zschc24, E1300303B06Rik, Idf1, Gbf1, Atad5, Sh3d19, Cdc134, Rpl1b, Myc, Fam110b, Casp12, Fat1, Fez2, Dclre1b, Nmr1a1, Polh, Cdc25a, Zfp472, Lpr1, Fam64a, Nrg1, Tmtc4, Aas, Polim2, Pim3, BC049807, Rfc4, Rnf168, Meirn, Racgap1, Acat2l1, Acat3, Mm1, C1eld2, Timeless, Rad51, Fbn1, Col12a1, Gise1, Nop56, Aic, Dhst13, Pcdh18, Pmp22, Gne, Hsd17a2, Dimt1, Smc6, Tif2, Dhodh, A452195, Aars1, Exosc6, Prkci, Tib1n, Fir2, Ncapd3, 2310061C15Rik, Tnk2, Cdk1, 2610039C10Rik, Xrc6b, 2900073G15Rik, Mcm10, D13Erd37e, F730047E07Rik, Ccpg8, Bicc1, Pcb, Dhc7, Lrp8, Lp1, Chaf1b, Msh6, Haux6, Cdc42, Snap47, Dusp12, Atf3, Fgf, BC049349, Ces1, Xrcc6bp1, Rrm2, Nsdhl, Pank1, Dnm11, Pak3, Kanc, Wdh41, Nrm, Eid1, Shisa4, Apcd41, En1, Pak1, Cdkn2zapn1, Wwc2, Brc42, C7947f1, Wbp11, Tcf19, Fapb5, Zfp354c, Smarcd3, A930004D18Rik, Plk4, Grib14, Rab30, Fads2, Mcm6, Cdc45, Ppbp, Zfp81, Mk, Rad18, Unfr1, Pnpla7, Gm112761//Histh2ad1//Hist1n2apn, 4930422G04Rik, Wwc1, Gen1, 1600002H07Rik, Dna2, Ddb2, Tk1, Col8a1, Rad51c, Cth, Fndc4, Fzd2, Isoc1, Fam195a, Alad1//LOC100046072, Psrc1, Slc13a, Pss1, Gpr124, Blm, Hdlbp, Plxna2, Zfpm2, Pps1, Lsm3, Fklp11, Sac3d1, Aptid1, Shg3, Gsg2, Ube2cbp, Nek7, Traip, Ahgap411a, Cenpi, Zfp389, Orc2, Tgfp1//Tgfp2, Recql, Gbp6, 9430037013Rik, Mcd2, Tcd1, Exosc2, Chek1, Cyp1b1, Trim59, Ppap2a, Pipn21, Escoc, Epb4, I13, Tspan4, E5yl2, Ccne2, Gli2, Eno3, Gmn1, Dlx1, Rassf7, Slc6a6, Ap10a, Rcc1, Asf1b, Dscoc1, Csf1r, Zfp503, Txnlp, Osbpl3, Nlrf1, Ephb2, Sdf21, Rasi11a, Dok, Nolic1, Nkbliz, Atad2, Igfr1, Zranb3, Mcm7, 6030445D17Rik, Rad51ap1, Nup107, Polk, Cdt1, Exo1, Rhp2, Cdr2, Ifat7, 281040811Rik, Ncapg, Palb2, Ly6a, Acat2, Smc2, Tps2, Fent1, Fggs, Orc11, Neil3, Nnne4, Pdgc, Stard4, Zmynd19, Ehd2, Mcm5, Msh2, Fam98a, Birc5, Dse, Tssc4, Bop1, Ssb3b, Pms2, Tbl1x1r1, Trip13, Abcg2, Ec12, Mkra7, Ubr7, Ckap21, 4933404012Rik, Lpp, Ctrbp, Arld4, Dtl, Slit2, Rnpep, Grib11, Fam33a, 170011382Rik, Fmri1, Ccpg4, Hsp90b1, Cdc45, D17H6S56E5, Tmem109, Dlk2, Fam13c, Weel1, Pold2, Pvr1, Steap1, Zfp101, Hells, Casc5, Fign1, Zfp692, Prrf5, Cand2, Ebp, Rnf26, LOC6765491//Sval1, Piplad2, Lox3, Meoa, Haus4, Tmpo, Pp1r15a, Clspn, Samd4, Suv39n2, Lmnbt1, Gm5081// Pps1, U90926, Peg12, Cong1, E2f8, Phylhpl, Rsu1, Tbl1x, Lass4, Shb, Mydam, Spc24, Ung, Cagcat1a, Apa1, Sh3bp5, Zwilch, Ski, Gpr180, Mum11, 4933413G19Rik1//Foxm11//Pebp1, Tmem41a, Cpx, Mcd, Wdr90, E2f1, Nup85, Fkbp4, Prim1, Unc5b, 1810032C008Rik, Morc4, LOC1000476191//Slc7a5, Rhod, Dsc1, Tmem107, Fapb51//Gm6166, Tdrk, Leprel1, Anln, Sgpl, Rfc3, 2410002F23Rik, Irs1, Slc44a2, Mecom, Glns1, E1f2, Irsn1, Mnat1, Skp2, Gpr85, Alkbh2, Scf2, Phlpp1, Dut, Dnajc9, Htra2, Dnajc13, Dpys13, Mogs, Nsl1, Phf15, Casp8ap2, Ppat, LOC634417, Spin4, D2Erd750e, Glns2, Usp1, Sigbecg, Nalp, Fg1//LOC100047108, Mrpl15, Nup43, Arhgef10, Cmn2, Piga, Htsf1, Foxd1, Fkbp14, 2900062L11Rik, Cnnal1, Finc, Aurkb, B230120H23Rik, Fos2//LOC634417, Spin4, D2Erd750e, Glns2, Usp1, Sigbecg, Nalp, Fg1//LOC100047108, Mrpl15, Nup43, Arhgef10, 2610002D18Rik, Rassf5, Nudt11, Haus8, Recq4, Trp63, LOC1000480501//Lphn2, Rras2, Ugcg, Ttk, Masp1, Mag13, LOC100046855, Diap3, Wnk4, Ddah1, 1110034A24Rik, Cdc6, Ergic1, 2810417H13Rik, Pole2, Pml, 5730471H19Rik, Suv39h1, Fancb, Dhfr, Sub1, Krt7, D10627, Styk1, Car5b, Aen, Eme1, Cdc7, Gm107741//Polr21//Usp50, Oat, Gemin5, Gemin6, Oxt1, Stom1, Alm1, Pole, Rpat, Tmys1//Tmys-ps, Mcm4, Fbxo5, Hdac7, Tada2a, 4930579C24Rik, Prim2, Pold1, Smc4, Dnajc3, BC055324, Zyx, Wnk1, Sval1, Cma2, Nasp, Erccll, Wisp2, Tpc2, Pcdh19, Adss, Idh1, Cdc47, D10Jhu81e, Orc6l, Ehd4, Ckap2, Hnmp, Lpl, Cxcl12, Hlrip3, Pdia6, Itgb5, Bcr41, 6530418L21Rik, Cpeb3, Kdelc2, Spc25, 2410017P07Rik, Rpa2, Mfr1, Chfr18, Mybl2, Ccne1, Pips2, R3hcc1, Tbx18, Tcof1, Sephs2, lpmk, Col7a1, Tnrc18, 463243411Rik, Rrm1, Incenp, Lims1, Slc25a30, Pdxp, Sdc2, Slibp, Tmem97, Anp32a, Lrig3, Nkfbiz, Steap2, Ccnph, Cc1d, Rad54b, Tipin, Dusa1, Fam164a</p> |
| 24 hour        | <p>Gstm2, Bivb2, Alg11, Zlyve26, A930001N09Rik, Hscb, Ier2, Adam23, Sgk1, Snapp3, BC094435, Rev3l, Cish, Rnf24, Hs1bp2, Cdh11, Ifitm1, Vgll4, Zfp703, Itpkb, Wis, Sord, Big2, Dab2, Zfp677, Phip, Serpinb8, Arfgap3//LOC100045474, Gpsm1, Naip6, Apool, P14, Ccpg1, Ddah2, M11, Fos, Runx2, Zfhx3, Bwcd3, Arngap31, Atxn1, Pcmd2, Zfp760, Cactn3, Ap7a, Pcdhb16, Zfp260, Phx4, Sash1, Tanc2, Dnm3os, Pld3, 2610005L07Rik, Agrn, Fam53b, Arsa, Bmp2k, Capn5, Creb32, Syne1, Tpp1, Btg1, Calococ1, Ml2, Tspan12, Per3, Phc3, Amhdh2, Dz1p1, Zland1, 5730446D14Rik, Arhgap21, Rcn3, Mmp9, Tob1, Vat1, Tcf12, Rmnd5a, Nkr, AW112010, Fggt, Nisch, Casp6, 4932438A13Rik, A430081F14Rik, Kdm5a, Ndr4, Serpinb1a, Lgr4, Ralgsd, D13Erd787e, Agpat4, A530054K11Rik, 4933407H18Rik, 923010815Rik, Gm608, Phf1, Scar3a, Zfp3611, Kidins220, Scai, 2810454L23Rik, Vamp7, D0H4S114, Mbt14, Gas7, Sh3pxd2b, Ankrd17, Spon2, Ccng2, Ectf1, P2rx4, Ciso, Mxra8, Gabarap, Ttyh3, Atf7p, Rhoq, Atf13651, Myo6, Tmem140, Sesn3, Gm16515, Wbp2, Hmox1, Gl8d1, Hba-a1//Hba-a2, Setd7, Dcaf12, Taok1, Pmp, Cisd, Pisd-ps1//Pisd-ps3, Hist1h1c, Mapk1ip1, Acdk2, Ncrna00081, Nlgn2, Serinc5, Sec61a1, Ypel3, Ncoad, LOC1000473241//Sesn1, Lrapap1, Af3, Impact, Nudt7, Fhnp1, Fam63b, Cyp39a1, Rbm39, Acadm, Luc7f2, lgbp1, Plin3, Nagk, Cbrn, 5730601F06Rik, Abhd14b, Pdgrfb, Cpeb2, Ulk1, Zfhx4, S100a13, 1110038D17Rik, Spa17, Lnepep, 4833427G06Rik, Rfn2, Zfp826, Wbscr27, Plac8, Zbb20, Rnf122, Tc7f1, Ssbp2, Rhou, Nbeal1, Plin3, Nagk, Cbrn, 5730601F06Rik, Abhd14b, Pdgrfb, Cpeb2, Ulk1, Zfhx4, S100a13, 1110038D17Rik, Nlcn1, Laptm4b, Syntj1, Gstm5, Ml3, Pten, Tmem14a, Ap11c, Flcn, Nf3, Nfat5, D030029J20Rik, Rassa4, Pnrc2, Anid4a, Zfp229, Adh1, 5730406M23Rik, Tns1, Lamp2, D6Wsu116e, AU015680, Hexb, Notch2, Dpp5e, Fam176b, Akap13, Ankrd44, Ctns, Avl9, Pk3r3, Gaa, Dexi, 2210419D22Rik1//Lrp6, 9030624J02Rik, Ap6v0d1, Sec16a, Abca1, LOC1000470931//Ube2h, Zlyve1, Klfap3, Thr4, A730054J21Rik, Egr2, 2010315B03Rik, C430003N24Rik, Pcdhb20, H3f3b, Zfp52, Fmnl2, Slc17a5, Zfp187, Fmo2, Tcfap2a, A426330a, Alox5ap, Zkscan1, Gnpda1, Vkorc1, Purg, Slc22a5, Baz2b, Foxn3, Golgb1, Vps13b, N4bp2, Pnf21a, Akap9, 4933421E11Rik, Ifl8, Cspr5//Gm7582, Pdgrfa, Sqrd, Gm2937, Pex1, Inpp5k, Digt1//LOC100047603, Arscxan1, Ddx60, Sik1, Slc25a36, Ifg3, Marcks11, Hbpt1, Pcmdt1, Adh1e1, Mospt1, Acaa2, Tnrc8b, Dusp5, Ttc30b, Tmem37, Gp8b, Lrsan1, Gm7609, 4933407C03Rik, Col6a3, Hexa, LOC75771, Fbx120, Foxo3, Pold4, Uqcrh, Itm2c, Galn4, Hsd17b11, 4921509J17Rik, Pnrc1, Pgpep1, Itga2b, Trak1, 12301020D17Rik, Tctex1d2, Grn, Helz, Limd1, Wbp1, Capn6, Mgst1, Htra3, Gata2, Plgf, Bcl2l11, Ml5, Gm10786, Wdr6, Lpin1, Kdm5b, Doxr, B230312A22Rik, Trim7, Crip1, Sta5a, Kcng1otf, Fbox32, Bbs1, 1810031K17Rik</p>                                                                                                                                                                                                                                                                                                                                                                                                                                                                                                                                                                                                                                                                                                                                                                                                                                                                                                                                                                                                                                                                                                                                                                                                                                                                                                                                                                                                                            |
| 8 day          | <p>Wnk4, E130110022Rik, Tom112, 6720401G13Rik, Kbbd7, Rnf112, 2810433D01Rik, D16Erd472e, Fam40b, Dirce2, Ppp1r2, Hist2h2be, Neb, Smox, Rbbp6, Mtsa8, LOC1000469631//Pgm5, Letm2, 4933439C10Rik, Scep1, Rspn10b2, Kera, 2310039F13Rik, Lgals4, 3110005L24Rik, Mustn1, Ttpi, Plekha4, Dp1, Abhd3, Merk, A730091E23Rik, Ptgir, Gas2, Sorcs2, Vegfa, Dcunt1d5, Papss2, Enox1, Cyhr1, 5930403N24Rik, Neckap5, Chstf15, Spsb3, Rgs3, Ucp1a1, Tmag11, Hist2h2bb, Fam73a, Mgprf, Epyc, Col5a3, Ndn, Hlx, Phkg1, Tmem191c, Apb2, Cactn4, Rapgef3, Kcnt2, A464131, Itga1, 2310035P21Rik, Syn2, 9430020K01Rik, Pla1a, Abi3bp, Nac3, B43020324Rik, Evf5, 2900092E17Rik1//Prr2, Tspan2, U46068, Acaa1b, Ecm2, Cel6, Tnks2, Ogt, Pox, 2210012G02Rik, If44, Arhgap6, Leprel1, C8g, Tmem44, Zscan18, Jmy, 8430427H17Rik, Gm12824, Prlx, Smarca2, Rab6b, Tmem2, Cdc6c2, 2810039B14Rik, Ppp4r11, 49215117Rik, Cdkn1b, Dnaic2, Evf4, Clec3b, Cplx2, Gfra2, P2rx1, Fam115a, 6330439K17Rik, Ctbs, LOC1000443951//Rbpms, Slc22a2, Tll3, Jakmip3, Gnas, 9030619P08Rik, 4930539J05Rik, H2-Dm4, Sema3d, AA408456, Plin4, LOC1000476821//Phkg1, Gpr133, Adh3a2, 4831440E17Rik, Chst2, Fam149a, Gsta2, Jarid2, Lama4, Amyl1, Rrm2b, Colec11, Ddit3, 150000150Rik, Tiam2, Hctf1r1, Zfp420, Dcun104, Pntr, C030030A07Rik, Srxp2, Sept6, Cml3, 2310409E12Rik, 3110007F17Rik, Tmem169, Eprs, Acs6, Erp44, Fam161a, Fhod3, Smo, 2310014F06Rik, Car9, 9430047G12Rik, Cde59a, Rbpms, 4930528F23Rik, Fam46c, Pnpla6, Adh7, Slc12a9, Arf4a, Gm11602, Hmgcs2, Trib3, Svll, 4930579G22Rik, Tulp2, Hnt3, Flj3, Etfv, Rassf2, Twist2, Tmem206, P2rx3, Hdac9, Gm1696, 4932415G12Rik, Spata9, Sloc2b1, Ccng2, Eepd1, 6030451C04Rik, 5730414N17Rik, Fus, Fam82a1, Obsl1, Zfp2, Kcld1, Tnnt1, Rbm5, Lhlpl2, Plcb1, Fgfr1//LOC100046239, Mysm1, Calcr1, Limch1, Gm11836, 4932415G12Rik, Spata9, Sloc2b1, Ccng2, Eepd1, 6030451C04Rik, 5730414N17Rik, Fus, Fam82a1, Obsl1, Zfp2, Kcld1, Tnnt1, Rbm5, Lhlpl2, Plcb1, Fgfr1//LOC100046239, Mysm1, Calcr1, Lrp5, Slc9a9, 3110057O12Rik, Fam20a, Gpr155, Ccni, Lmcd1, Adamis6, L1cam, Mtf, Cxcl15, Hist2h3c1, Cyp2j6, A4806531//LOC100047112, Cln2, Fam71e1, Ddrgk1, Serinc4, Lamb2, 9430091E24Rik, Sema3b, Adams2, Adams14, Gpr135, Incat1, Eny2, 9630023C09Rik, Spry4, Aox1, Tmcc3, AW011738, Khlh10, Sparc, Gab3, Tmem8b, Pter, 1700019G17Rik, Cdh26, Klfc2, Ddo, 3110052M02Rik, 4933411B09Rik, Lrm4, Trim34, Zfp455, 2900054C01Rik, Srp54a1//Srp54b, Kazald1, Zfp68, Dmp1, Pcdhb12, Mmp3, BC029214, Gls, A930035D04Rik, A330076H08Rik, Terfip2, 2010007H06Rik, Fzd4, Hspa41, 4933431E20Rik, Slc1a5, Ypel4, Aplf, Anxa11//Gm22601//Gm2274, Tprn5, Ter1, Susd2, Vav3, 1700029J07Rik, Dock4, Slc43a2, Pliira, S100a8, Arngap26, Nudt12, 5830411K21Rik, Loc201a, Mamstr, Pcdhb15, 4930578N16Rik, Mcal1, Gm15698, Dmd, Nudt4, Gm25211//Sema3a, Rfssd, LOC6320731//U46068, Fucea1, Mmm2, Nudt1, 5730410E15Rik, Chac1, E030016H06Rik, Fxyd1, Cdc28a1//LOC100045472, Inmt, Zbb4, Tnfrsf21, Tnnc2, 2210008F06Rik, Pipox, Tm6st1, Shprn, Gnao1, Cyp4f14, Pappa, Hist2h3c2, Fxyd5, Efnb1, Phf201, 1810010H24Rik, Olfm1, Abca9, Pcdhb11, Erc2, Cldn9, Myn11, Lman11, Wwox, Dnajb9, Lpca2, Lrrk2, Ptpn3, 2810408A11Rik, D9Erd720e, Cetrn4, Gm6556, Gm14005</p>                                                                                                                                                                                                                                                                                                                                                                                                                                                                                                                                                                                                                                                                                                                                                                                                                                                                                                                                                                                               |

| Gene Ontology term                                                                  | FDR-corrected p-value |                       |                       |                       |
|-------------------------------------------------------------------------------------|-----------------------|-----------------------|-----------------------|-----------------------|
|                                                                                     | 1 h                   | 6 h                   | 24 h                  | 8 days                |
| multicellular organismal process                                                    | $3.52 \times 10^{-3}$ |                       | $1.79 \times 10^{-3}$ | $1.16 \times 10^{-3}$ |
| multicellular organismal development                                                | $1.18 \times 10^{-5}$ | $3.07 \times 10^{-3}$ | $5.49 \times 10^{-5}$ | $1.82 \times 10^{-5}$ |
| nervous system development                                                          |                       |                       | $9.96 \times 10^{-3}$ | $2.44 \times 10^{-3}$ |
| system development                                                                  | $4.37 \times 10^{-6}$ | $2.15 \times 10^{-3}$ | $9.15 \times 10^{-5}$ | $1.99 \times 10^{-5}$ |
| skeletal system development                                                         | $7.20 \times 10^{-4}$ |                       | $1.13 \times 10^{-3}$ | $1.26 \times 10^{-3}$ |
| skeletal system morphogenesis                                                       |                       |                       | $3.15 \times 10^{-3}$ |                       |
| urogenital system development                                                       | $1.89 \times 10^{-3}$ |                       |                       |                       |
| kidney development                                                                  | $4.01 \times 10^{-3}$ |                       |                       |                       |
| heart development                                                                   | $1.33 \times 10^{-3}$ |                       |                       |                       |
| organ development                                                                   | $4.47 \times 10^{-7}$ | $1.59 \times 10^{-3}$ |                       |                       |
| organ morphogenesis                                                                 | $6.07 \times 10^{-4}$ | $1.21 \times 10^{-4}$ |                       |                       |
| muscle organ development                                                            | $2.18 \times 10^{-4}$ |                       |                       |                       |
| skeletal muscle organ development                                                   | $9.11 \times 10^{-4}$ |                       |                       |                       |
| skeletal muscle tissue development                                                  | $7.83 \times 10^{-4}$ |                       |                       |                       |
| striated muscle tissue development                                                  | $5.37 \times 10^{-5}$ |                       |                       |                       |
| muscle tissue development                                                           | $3.99 \times 10^{-5}$ |                       |                       |                       |
| tissue development                                                                  | $1.96 \times 10^{-7}$ | $8.13 \times 10^{-4}$ |                       |                       |
| tissue morphogenesis                                                                | $4.41 \times 10^{-3}$ | $2.94 \times 10^{-4}$ |                       |                       |
| epithelium development                                                              |                       | $2.29 \times 10^{-3}$ |                       |                       |
| morphogenesis of an epithelium                                                      |                       |                       |                       |                       |
| epithelial tube morphogenesis                                                       |                       | $1.49 \times 10^{-3}$ |                       |                       |
| mammary gland duct morphogenesis                                                    |                       | $2.87 \times 10^{-4}$ |                       |                       |
| mammary gland morphogenesis                                                         |                       | $6.17 \times 10^{-3}$ |                       |                       |
| gland morphogenesis                                                                 |                       | $6.90 \times 10^{-4}$ |                       |                       |
| tube development                                                                    | $6.25 \times 10^{-4}$ | $4.06 \times 10^{-4}$ |                       |                       |
| tube morphogenesis                                                                  |                       | $7.95 \times 10^{-5}$ |                       |                       |
| branching morphogenesis of a tube                                                   |                       | $7.89 \times 10^{-4}$ |                       |                       |
| morphogenesis of a branching structure                                              | $6.20 \times 10^{-4}$ | $8.09 \times 10^{-5}$ |                       |                       |
| anatomical structure morphogenesis                                                  | $1.25 \times 10^{-5}$ | $2.37 \times 10^{-4}$ | $1.51 \times 10^{-3}$ | $1.80 \times 10^{-3}$ |
| organ morphogenesis                                                                 |                       |                       | $2.95 \times 10^{-3}$ |                       |
| organ development                                                                   |                       |                       | $5.16 \times 10^{-3}$ | $2.89 \times 10^{-3}$ |
| vasculature development                                                             | $4.16 \times 10^{-5}$ | $5.89 \times 10^{-3}$ | $1.23 \times 10^{-3}$ |                       |
| blood vessel development                                                            | $8.54 \times 10^{-5}$ | $3.97 \times 10^{-3}$ | $1.95 \times 10^{-3}$ |                       |
| blood vessel morphogenesis                                                          | $1.05 \times 10^{-4}$ |                       |                       |                       |
| angiogenesis                                                                        | $2.98 \times 10^{-3}$ |                       |                       |                       |
| anatomical structure formation involved in morphogenesis                            | $1.31 \times 10^{-3}$ |                       |                       |                       |
| anatomical structure development                                                    | $4.27 \times 10^{-5}$ | $1.33 \times 10^{-3}$ | $7.80 \times 10^{-5}$ | $7.67 \times 10^{-6}$ |
| developmental process                                                               | $9.70 \times 10^{-5}$ | $2.73 \times 10^{-3}$ | $6.58 \times 10^{-5}$ | $5.90 \times 10^{-6}$ |
| regulation of developmental process                                                 | $4.49 \times 10^{-6}$ | $3.71 \times 10^{-3}$ | $8.19 \times 10^{-3}$ |                       |
| regulation of anatomical structure morphogenesis                                    | $4.79 \times 10^{-4}$ | $5.98 \times 10^{-3}$ |                       |                       |
| regulation of cell shape                                                            | $7.20 \times 10^{-4}$ |                       |                       |                       |
| regulation of cellular component organization                                       | $6.64 \times 10^{-3}$ |                       |                       |                       |
| positive regulation of biological process                                           |                       |                       | $1.31 \times 10^{-3}$ | $3.06 \times 10^{-3}$ |
| positive regulation of cellular process                                             |                       |                       | $3.29 \times 10^{-4}$ | $2.96 \times 10^{-3}$ |
| biological regulation                                                               | $6.67 \times 10^{-7}$ |                       | $2.11 \times 10^{-2}$ |                       |
| regulation of biological process                                                    | $9.01 \times 10^{-3}$ |                       | $1.54 \times 10^{-2}$ |                       |
| negative regulation of biological process                                           | $3.18 \times 10^{-3}$ |                       |                       |                       |
| negative regulation of cellular process                                             | $3.07 \times 10^{-3}$ |                       |                       |                       |
| regulation of cell-substrate adhesion                                               | $7.59 \times 10^{-3}$ |                       |                       |                       |
| regulation of cell adhesion                                                         | $5.98 \times 10^{-3}$ |                       |                       |                       |
| regulation of cellular process                                                      | $5.88 \times 10^{-7}$ |                       |                       |                       |
| enzyme linked receptor protein signaling pathway                                    | $4.06 \times 10^{-5}$ |                       |                       |                       |
| transmembrane receptor protein tyrosine kinase signaling pathway                    | $8.93 \times 10^{-3}$ |                       |                       |                       |
| regulation of cellular component movement                                           |                       |                       |                       |                       |
| regulation of cell migration                                                        | $2.01 \times 10^{-5}$ |                       |                       |                       |
| positive regulation of cellular component                                           |                       |                       |                       |                       |
| positive regulation of cellular process                                             | $6.67 \times 10^{-3}$ | $2.29 \times 10^{-3}$ |                       |                       |
| positive regulation of cell migration                                               | $7.81 \times 10^{-4}$ |                       |                       |                       |
| cell motility                                                                       | $8.51 \times 10^{-3}$ |                       |                       |                       |
| cell migration                                                                      | $2.15 \times 10^{-3}$ |                       |                       |                       |
| positive regulation of locomotion                                                   | $2.25 \times 10^{-3}$ |                       |                       |                       |
| regulation of locomotion                                                            | $1.19 \times 10^{-4}$ |                       |                       |                       |
| regulation of multicellular organismal process                                      | $9.04 \times 10^{-3}$ |                       | $3.52 \times 10^{-3}$ | $1.75 \times 10^{-3}$ |
| regulation of metabolic process                                                     | $6.71 \times 10^{-4}$ |                       |                       |                       |
| regulation of nitrogen compound metabolic process                                   | $8.07 \times 10^{-3}$ |                       |                       |                       |
| regulation of cellular metabolic process                                            | $6.35 \times 10^{-4}$ |                       |                       |                       |
| regulation of nucleobase, nucleoside, nucleotide and nucleic acid metabolic process | $6.63 \times 10^{-3}$ |                       |                       |                       |
| regulation of primary metabolic process                                             | $2.79 \times 10^{-3}$ |                       |                       |                       |
| regulation of cellular biosynthetic process                                         | $8.56 \times 10^{-3}$ |                       |                       |                       |
| regulation of biosynthetic process                                                  | $9.01 \times 10^{-3}$ |                       |                       |                       |
| regulation of macromolecule biosynthetic process                                    | $8.78 \times 10^{-3}$ |                       |                       |                       |
| regulation of transcription DNA dependent                                           | $8.47 \times 10^{-3}$ |                       |                       |                       |
| regulation of transcription from RNA polymerase II promoter                         | $1.58 \times 10^{-3}$ |                       |                       |                       |
| positive regulation of transcription from RNA polymerase II promoter                | $9.83 \times 10^{-3}$ |                       |                       |                       |
| regulation of gene expression                                                       | $5.89 \times 10^{-3}$ |                       |                       |                       |
| regulation of macromolecule metabolic process                                       | $7.33 \times 10^{-3}$ |                       |                       |                       |

Figure S4. Gene Ontology terms for selected genes  
GO terms down-regulated due to TPA treatment for 1 h, 6 h, 24 h, and 8 days (C).

## C (continued)

| Gene Ontology term                               | FDR-corrected p-value |                        |      |                       |
|--------------------------------------------------|-----------------------|------------------------|------|-----------------------|
|                                                  | 1 h                   | 6 h                    | 24 h | 8 days                |
| nitrogen compound metabolic process              |                       | $8.99 \times 10^{-10}$ |      |                       |
| cellular nitrogen compound metabolic process     |                       | $6.67 \times 10^{-10}$ |      |                       |
| nucleobase-containing compound metabolic process |                       | $9.74 \times 10^{-11}$ |      |                       |
| DNA metabolic process                            |                       | $1.22 \times 10^{-34}$ |      |                       |
| regulation of DNA metabolic process              |                       | $3.59 \times 10^{-3}$  |      |                       |
| negative regulation of DNA metabolic process     |                       | $1.53 \times 10^{-4}$  |      |                       |
| DNA recombination                                |                       | $9.45 \times 10^{-9}$  |      |                       |
| DNA replication initiation                       |                       | $8.52 \times 10^{-6}$  |      |                       |
| DNA-dependent DNA replication                    |                       | $2.66 \times 10^{-9}$  |      |                       |
| DNA replication                                  |                       | $1.97 \times 10^{-29}$ |      |                       |
| DNA repair                                       |                       | $5.73 \times 10^{-14}$ |      |                       |
| cellular macromolecule metabolic process         |                       | $3.82 \times 10^{-4}$  |      |                       |
| cellular metabolic process                       |                       | $2.45 \times 10^{-3}$  |      |                       |
| cell division                                    |                       | $1.07 \times 10^{-10}$ |      |                       |
| cellular process                                 |                       | $9.14 \times 10^{-5}$  |      |                       |
| response to stress                               |                       | $6.48 \times 10^{-8}$  |      |                       |
| cellular response to stress                      |                       | $5.73 \times 10^{-13}$ |      |                       |
| cellular response to stimulus                    |                       | $2.62 \times 10^{-10}$ |      |                       |
| response to ionizing radiation                   |                       | $3.56 \times 10^{-3}$  |      |                       |
| response to stimulus                             |                       | $1.81 \times 10^{-3}$  |      |                       |
| cell cycle                                       |                       | $1.68 \times 10^{-22}$ |      |                       |
| regulation of cell cycle                         |                       | $4.10 \times 10^{-4}$  |      |                       |
| mitotic cell cycle                               |                       | $6.31 \times 10^{-10}$ |      |                       |
| M phase of mitotic cell cycle                    |                       | $6.69 \times 10^{-19}$ |      |                       |
| M phase                                          |                       | $3.77 \times 10^{-11}$ |      |                       |
| cell cycle phase                                 |                       | $1.51 \times 10^{-11}$ |      |                       |
| cell cycle process                               |                       | $3.68 \times 10^{-12}$ |      |                       |
| mitosis                                          |                       | $3.75 \times 10^{-10}$ |      |                       |
| nuclear division                                 |                       | $3.75 \times 10^{-10}$ |      |                       |
| organelle fission                                |                       | $8.89 \times 10^{-10}$ |      |                       |
| cytoskeleton organization                        |                       | $6.77 \times 10^{-3}$  |      |                       |
| organelle organization                           |                       | $8.37 \times 10^{-8}$  |      |                       |
| cellular component organization                  |                       | $2.13 \times 10^{-8}$  |      |                       |
| biological adhesion                              |                       |                        |      | $1.72 \times 10^{-3}$ |
| cell adhesion                                    |                       |                        |      | $1.81 \times 10^{-3}$ |
| regulation of cell-substrate adhesion            |                       |                        |      | $9.09 \times 10^{-3}$ |
| extracellular structure organization             |                       |                        |      | $4.99 \times 10^{-4}$ |
| extracellular matrix organization                |                       |                        |      | $3.12 \times 10^{-5}$ |

Figure S4. Gene Ontology terms for selected genes  
GO terms down-regulated due to TPA treatment for 1 h, 6 h, 24 h, and 8 days (C, continued).

# Pathway Analysis Using IPA Software; canonical pathway

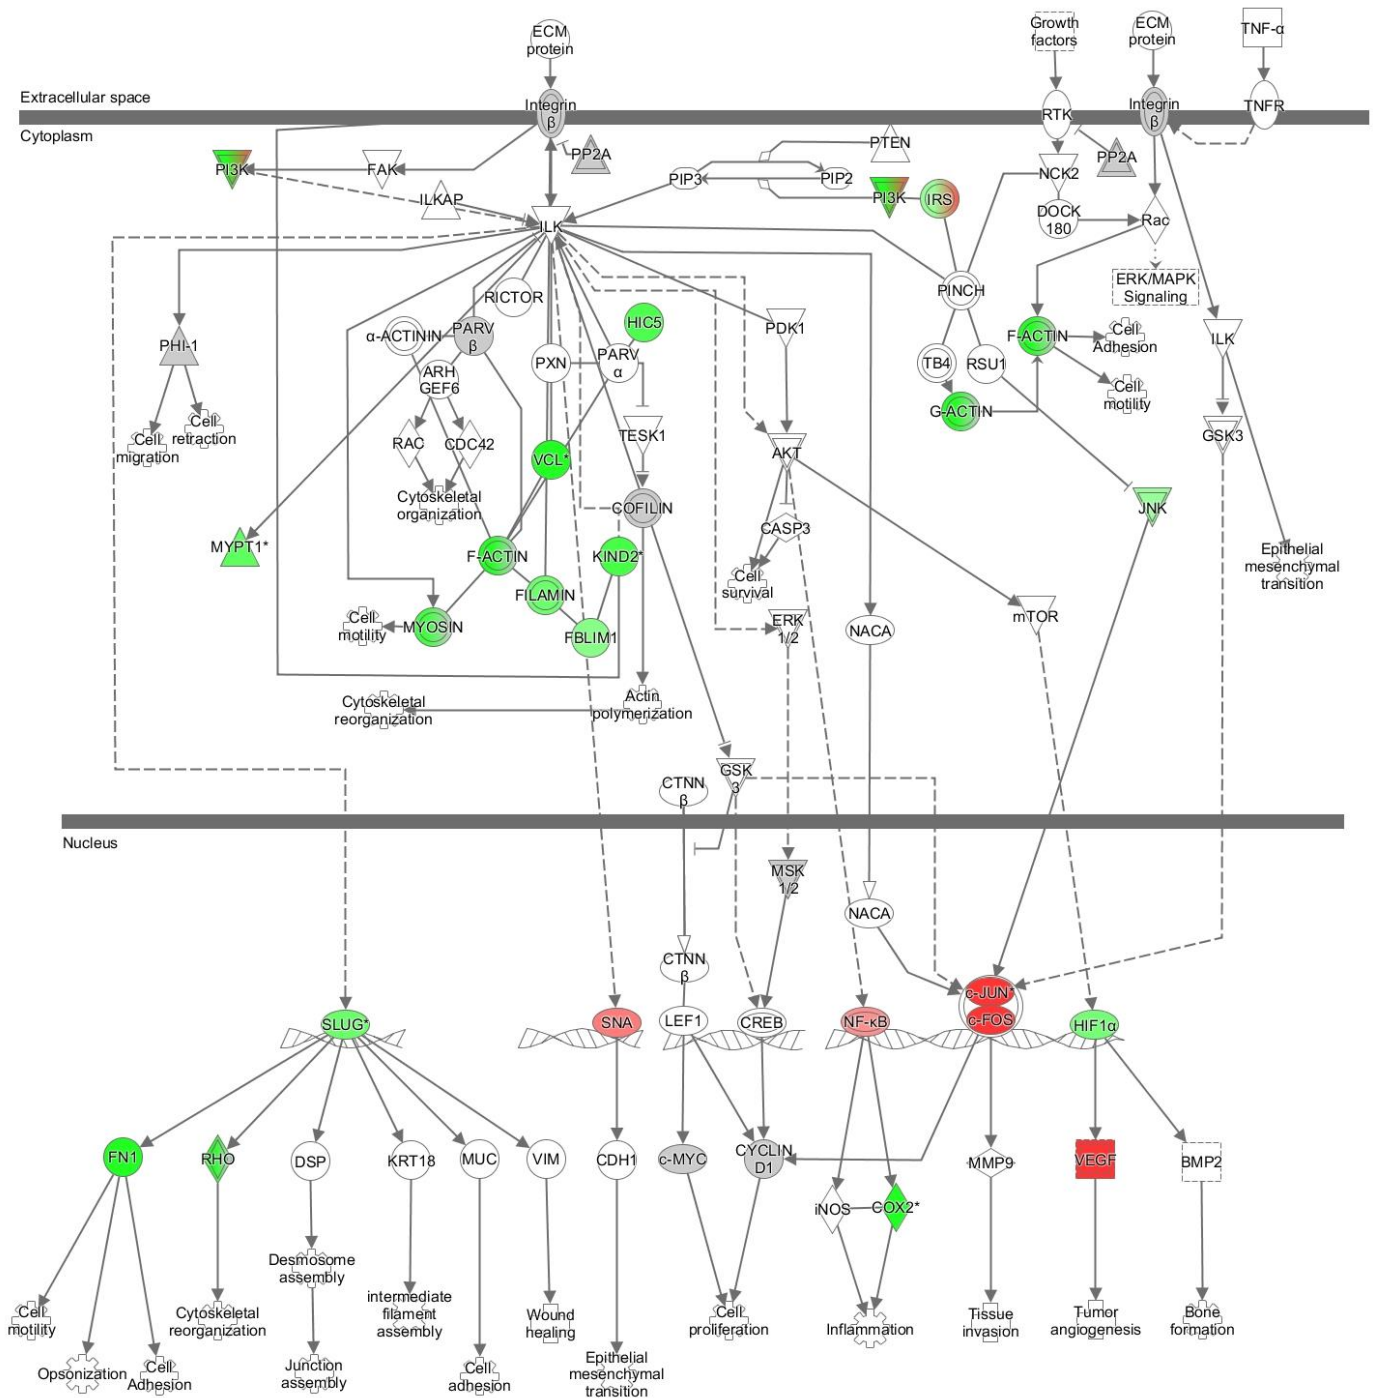

Figure S5. ILK Signaling at 1 h

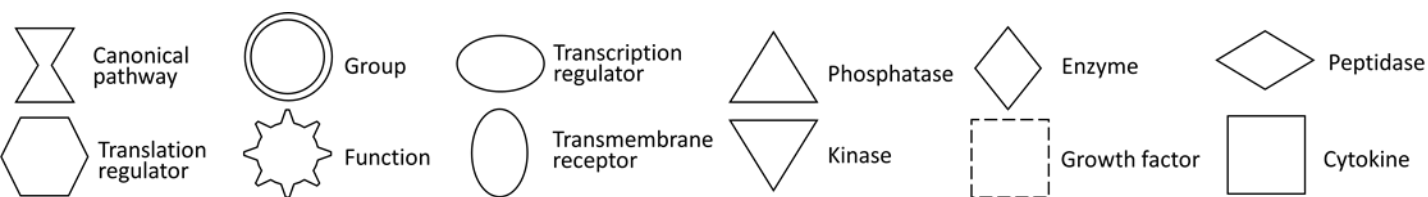

Red: Increased, FDR<0.05 versus solvent control

Green: Decreased, FDR<0.05 versus solvent control

| Symbol       | Synonym(s)                                                                                                                                                                                                                                                                                                                                                                                                                                                                                                                                                             |
|--------------|------------------------------------------------------------------------------------------------------------------------------------------------------------------------------------------------------------------------------------------------------------------------------------------------------------------------------------------------------------------------------------------------------------------------------------------------------------------------------------------------------------------------------------------------------------------------|
| AKT          | AKT1/2/3, B/Akt, PKB, RAC-PK                                                                                                                                                                                                                                                                                                                                                                                                                                                                                                                                           |
| Alphactinin  | ACTININ, Actinin alpha, Actinin $\alpha$ , ACTN, $\alpha$ -Actinin, $\alpha$ Actinin human                                                                                                                                                                                                                                                                                                                                                                                                                                                                             |
| Ap1          | activator protein-1, c-Jun                                                                                                                                                                                                                                                                                                                                                                                                                                                                                                                                             |
| ARHGEF6      | 1600028C08RIK, 1700038J06RIK, 4930592P22RIK, alp, alpha-PIX, COOL2, MRX46, PIXA, Pix-alpha, Pix- $\alpha$ , Rac/Cdc42 guanine nucleotide exchange factor 6, Rac/Cdc42 guanine nucleotide exchange factor (GEF) 6, $\alpha$ -PIX                                                                                                                                                                                                                                                                                                                                        |
| Betaintegrin | beta-Integrin, Integrin beta, $\beta$ -Integrin                                                                                                                                                                                                                                                                                                                                                                                                                                                                                                                        |
| BMP2         | AI467020, BDA2, Bmp, BMP2A, bone morphogenetic protein 2, BONE MORPHOGENIC protein 2, SSFSC1, SSFSC                                                                                                                                                                                                                                                                                                                                                                                                                                                                    |
| CASP3        | A830040C14RIK, AC-, AC-3, Casp, Caspase-3, CASPASE-3 p20, CC3, CPP, CPP-32, CPP32B, CPP32-beta, CPP32- $\beta$ , Ice-like cysteine protease, Lice, mld, mldy, SCA-1, Ya, YAMA                                                                                                                                                                                                                                                                                                                                                                                          |
| CCND1        | AI327039, B-CELL CLL/LYMPHOMA 1, bcl-, BCL1, cD1, CycD1, CYCLIN D1, Cyl-, Cyl-1, D11S287E, G1/S-Specific Cyclin D1, PR, PRAD1, U21B31                                                                                                                                                                                                                                                                                                                                                                                                                                  |
| CDC42        | AI747189, AU018915, CDC42Hs, cell division cycle 42, CELLULAR GROWTH REGULATING, G25K, TKS                                                                                                                                                                                                                                                                                                                                                                                                                                                                             |
| CDH1         | AA960649, ARC-1, BCDS1, cadherin 1, Cadherin E, CD324, CDHE, CSEIL, E-ca, ECAD, E-cadh, E-cadherin, L-C, L-CAM, Um, UVO, uvomoulin                                                                                                                                                                                                                                                                                                                                                                                                                                     |
| COFILIN      | CFL                                                                                                                                                                                                                                                                                                                                                                                                                                                                                                                                                                    |
| CREB         | Cbp, Cyclic AMP response element binding                                                                                                                                                                                                                                                                                                                                                                                                                                                                                                                               |
| CTNNB1       | armadillo, Beta-cat, beta CATENIN, Bfc, Cat, CATENIN beta, catenin beta 1, catenin (cadherin associated protein), beta 1, catenin (cadherin associated protein), $\beta$ 1, CATENIN $\beta$ , catenin $\beta$ 1, CATNB, CTNNB1, CTNNB, CTNN beta, CTNN $\beta$ , EVR7, Mesc, MRD19, NEDSDV, $\beta$ -cat, $\beta$ -catenin                                                                                                                                                                                                                                             |
| DOCK1        | 9130006G06RIK, A1854900, b2b3190C, b2b3190Clo, ced5, D630004B07RIK, dedicator of cyto-kinesis 1, Dock18, DOCK180, LOC679295, RGD1566072                                                                                                                                                                                                                                                                                                                                                                                                                                |
| DSP          | 2300002E22RIK, 5730453H04RIK, AA407887, AA407888, AW109828, D, DCWHKTA, desmoplakin, DP, DPLI, r, rul                                                                                                                                                                                                                                                                                                                                                                                                                                                                  |
| ERK1/2       | MAPK p44/42, MAPK p44/p42, p42/44 mapk, P42/p44 erk, P42/p44 mapk, p42/p44 MAP KINASE                                                                                                                                                                                                                                                                                                                                                                                                                                                                                  |
| F Actin      | Filamentous Actin                                                                                                                                                                                                                                                                                                                                                                                                                                                                                                                                                      |
| FBLIM1       | 2410043F08RIK, C, CAL, DKFZp434G171, Fbl, FBLP-1, filamin binding LIM protein 1, Gt10, hnRNP L, mig, migfi, MIGFILIN, migfilin(s)                                                                                                                                                                                                                                                                                                                                                                                                                                      |
| FERM2        | AA960555, FERM domain containing kindlin 2, fermitin family member 2, Kind, KIND2, KINDLIN 2, Mig, MIG2, Plekh, PLEKHC1, UNC112, UNC112B                                                                                                                                                                                                                                                                                                                                                                                                                               |
| FILAMIN      | Abp, ABP280/FH1                                                                                                                                                                                                                                                                                                                                                                                                                                                                                                                                                        |
| FN1          | cFn, CIG, E330027I09, ED-B, F, FIBNEC, Fibronectin, FIBRONECTIN 1, Fibronectin3 M1, Fibronectin i, FINC, FN, FN1 isoform 1, FNZ, GFND, GFND2, LETS, MSF, SMDCF                                                                                                                                                                                                                                                                                                                                                                                                         |
| FOS          | AP-1, c-f, C-FOS, D12Rfj, D12Rfj1, FBj osteosarcoma oncogene, Fos proto-oncogene, AP-1 transcription factor subunit, p55                                                                                                                                                                                                                                                                                                                                                                                                                                               |
| Gsk3         | Glycogen synthase kinase, Gsk, GSK3 alpha/beta, GSK3 $\alpha/\beta$                                                                                                                                                                                                                                                                                                                                                                                                                                                                                                    |
| HIF1A        | AA959795, bHLHe7, bHLHe78, HIF-1, HIF-1-ALPHA, HIF-1 $\alpha$ (hydroxylated), HIF-1- $\alpha$ , HIF-1 $\alpha$ (hydroxylated), Hypoxia inducible factor 1 alpha subunit, hypoxia inducible factor 1, alpha subunit, hypoxia inducible factor 1 subunit alpha, hypoxia inducible factor 1 subunit $\alpha$ , Hypoxia inducible factor 1 $\alpha$ subunit, hypoxia inducible factor 1, $\alpha$ subunit, MO, MOP1, PASD8                                                                                                                                                 |
| ILK          | AA511515, ESTM2, ESTM24, HEL-S-28, ILK-1, ILK-2, integrin-linked kinase, P59, p59ILK                                                                                                                                                                                                                                                                                                                                                                                                                                                                                   |
| ILKAP        | 0710007A14RIK, 1600009O09RIK, AF095927, AK055417, ILKAP2, ILKAP3, ILK associated serine/threonine phosphatase, integrin-linked kinase-associated serine/threonine phosphatase 2C, PP2C-D, PP2C-DELTA, PP2C- $\delta$ , PPM10                                                                                                                                                                                                                                                                                                                                           |
| IRS          | INSULIN receptor SUBSTRATE                                                                                                                                                                                                                                                                                                                                                                                                                                                                                                                                             |
| JNK          | JNK 54/46, Jnk p56, JNK/SAPK, JUN KINASE, p40, p47, Sapk/Jnk                                                                                                                                                                                                                                                                                                                                                                                                                                                                                                           |
| JUN          | Activator protein 1, AP-1, API-1, c-jun, cJUN, Junc, jun proto-oncogene, Jun proto-oncogene, AP-1 transcription factor subunit, LOC100288387, LOC100291417, LOC100293034, p39, v-Jun, V-jun Avian Sarcoma Virus 17 Oncogene Homolog, V-jun Sarcoma Virus 17 Oncogene Homolog                                                                                                                                                                                                                                                                                           |
| KRT18        | 48-kD Keratin, CK-18, Ck D, CYK18, K18, K1cr, keratin 18, Keratin complex 1 acidic gene 18, Krt1-1, KRT1-18                                                                                                                                                                                                                                                                                                                                                                                                                                                            |
| LEF1         | 3000002B05, A451430, Lef-, lymphoid enhancer binding factor 1, TCF10, TCF1ALPHA, TCF7L3, TCF/LEF                                                                                                                                                                                                                                                                                                                                                                                                                                                                       |
| LIMS         | PINCH                                                                                                                                                                                                                                                                                                                                                                                                                                                                                                                                                                  |
| MAP2K6       | MAPKK6, Mapk kinase 6, MEK6, mitogen-activated protein kinase kinase 6, MKK6, MKK6BE, Prkm, PRKMK6, Rac, SAP, SAPKK-3                                                                                                                                                                                                                                                                                                                                                                                                                                                  |
| MMP9         | AW743869, B/MMP, B/MMP9, C1g4, CLG4B, COLLAGENASE type IV, Gelatinase B, GELB, GI 92-kda, MANDP2, matrix metalloproteinase 9, METALLOPROTEINASE 9, MMP-, pro-MMP-9                                                                                                                                                                                                                                                                                                                                                                                                     |
| MTOR         | 2610315D21RIK, AI327068, fl, Flat, Fr, FRAP, FRAP1, FRAP2, FRB, mechanistic target of rapamycin kinase, RA, RAF, RAFT1, RAP1, RRAFT1, SKS                                                                                                                                                                                                                                                                                                                                                                                                                              |
| MUC1         | ADMCKD1, ADMCKD, ADTKD2, CA 15-3, CD227, EM, EMA, Episialin, H23AG, KL-6, MAM6, MCD, MCKD1, MCKD, MUC1-CT, Mucin1, Mucin, mucin 1, cell surface associated, Mucin-1 subunit beta, Mucin-1 subunit $\beta$ , PANCREATIC MUCIN, PEM, PEMT, PUM                                                                                                                                                                                                                                                                                                                           |
| MYC          | AU016757, bHLHe3, bHLHe39, CMYC, C-MYC-P64, mMyc, MRTL, Myc2, MYCC, MYC proto-oncogene, bHLH transcription factor, myelocytomatosis oncogene, N, Niard, Nird, RNCMYC                                                                                                                                                                                                                                                                                                                                                                                                   |
| NACA         | AL022831, AL024382, alpha-NAC, D12Mgi4, Gm1878, HSD48, mKIAA0363, NACA1, NAC-alpha, NAC- $\alpha$ , Nascent polypeptide associated complex alpha chain, Nascent polypeptide-associated complex alpha polypeptide, nascent polypeptide associated complex subunit alpha, nascent polypeptide associated complex subunit $\alpha$ , Nascent polypeptide associated complex $\alpha$ chain, Nascent polypeptide-associated complex $\alpha$ polypeptide, sk, skNAC, $\alpha$ -NAC                                                                                         |
| NCK2         | 4833426I10RIK, GRB4, Grb, LOC100503894, NCK adaptor protein 2, Nck $\beta$ , NCKbe, NCKbeta, non-catalytic region of tyrosine kinase adaptor protein 2                                                                                                                                                                                                                                                                                                                                                                                                                 |
| NFKB         | NF-kappa B, NF-k B, nuclear factor-kappa B, transcription factor nuclear factor kappa B                                                                                                                                                                                                                                                                                                                                                                                                                                                                                |
| NOS2         | CALCIUM-INDEPENDENT NOS, Hepatocyte NOS, HEP-NOS, Inducible NOS, INOS, LOC497963, MAC-NOS, N, nitric oxide synthase 2, nitric oxide synthase 2, inducible, No, NOS, NOS2A, NOS-II, similar to Nitric oxide synthase, inducible (NOS type II) (Inducible NO synthase) (Inducible NOS) (iNOS)                                                                                                                                                                                                                                                                            |
| PARVA        | 2010012A22RIK, 5430400F08RIK, act, Actopaxin, Actp, AI225929, alpha PARVIN, AU042898, CH-IL, CH-ILKBP, MXRA2, Parvin, Parvin-alpha, parvin, alpha, Parvin- $\alpha$ , parvin, $\alpha$ , $\alpha$ PARVIN                                                                                                                                                                                                                                                                                                                                                               |
| PARVB        | aff, affxin, AI595373, AW742462, CGI-56, D15Gsk, D15Gsk1, Parvin-beta, parvin, beta, Parvin- $\beta$ , parvin, $\beta$                                                                                                                                                                                                                                                                                                                                                                                                                                                 |
| PDPK1        | 3'-PDK, 3-phosphoinositide dependent protein kinase-1, Pdk, PDK1, PDPK2, PDPK2P, PRO0461                                                                                                                                                                                                                                                                                                                                                                                                                                                                               |
| PI3K         | 1-phosphatidylinositol 3-kinase, 2.7.1.137, ATP:1-phosphatidyl-1D-myo-inositol 3-phosphotransferase, Phosphatidylinositol 3 kinase, phosphatidylinositol 3'-kinase, PI3-kinase, Ptdlns 3 Kinase, type I phosphatidylinositol kinase, type III phosphoinositide 3-kinase, Vps34p                                                                                                                                                                                                                                                                                        |
| PIP2         | 1,2-diacyl-sn-glycero-3-phospho-(1'-myo-inositol-4',5'-bisphosphate), 1-O-(3-sn-phosphatidyl)-1D-myo-inositol 4,5-bis(dihydrogen phosphate), 1-phosphatidyl-1D-myo-inositol 4,5-bisphosphate, C11H19O19P3R2                                                                                                                                                                                                                                                                                                                                                            |
| PIP3         | 1-phosphatidyl-1D-myo-inositol 3,4,5-trisphosphate, phosphatidylinositol 3,4,5-trisphosphate, phosphoinositide (3,4,5) P3, PI(3,4,5)P3, Plns(3,4,5)P3, PIP3, Ptdlns(3,4,5)P3                                                                                                                                                                                                                                                                                                                                                                                           |
| PP2A         | protein PHOSPHATASE 2A, Protein Phosphatase Type2a                                                                                                                                                                                                                                                                                                                                                                                                                                                                                                                     |
| PPP1R12A     | 1200015F06RIK, 5730577I22RIK, AA792106, AV099298, D10Erd625, D10Erd625e, GUBS, M110, M130, MBS, MBS130, MBSP, Mypt, MYPT1, protein phosphatase 1 regulatory subunit 12A, protein phosphatase 1, regulatory subunit 12A                                                                                                                                                                                                                                                                                                                                                 |
| PPP1R14B     | AOM1, AOM172, FG-4095, P, PHI, PHI-1, Phospholipase c neighboring, PLC, PLCB3N, PNG, Protein phosphatase 1, protein phosphatase 1, protein phosphatase 1 regulatory inhibitor subunit 14B, protein phosphatase 1, regulatory (inhibitor) subunit 14B, protein phosphatase 1, regulatory inhibitor subunit 14B, SOM172                                                                                                                                                                                                                                                  |
| PTEN         | 10q23del, 2310035O07RIK, A130070J02RIK, AI463227, B430203M17RIK, BZS, CWS1, DEC, GLM2, MHAM, MMAC, MMAC1, MUTATED IN MULTIPLE ADVANCED CANCERS, mutated in multiple advanced cancers 1, phosphatase and tensin homolog, PTEN1, PTENbeta, TEP, TEP1                                                                                                                                                                                                                                                                                                                     |
| PTGS2        | COX, COX-2, CYCLO-OXYGENASE 2, GRIPGHS, hCox-2, hnCOX-2, INDUCIBLE CYCLOOXYGENASE, PES-2, PGG/HS, Pgh, PGHS, PGHS-2, PGH synthase 2, Pgi2 synthase, Pgs2, Pgsi, PHS, PHS-2, PHS II, Prostaglandin endoperoxide synthase 2, Tis, TIS10                                                                                                                                                                                                                                                                                                                                  |
| PTK2         | FA, Fad, FADK, FADK 1, FAK, FAK1, FAK related non-kinase, FR, p125FAK, pp125FAK, PPP1R71, protein tyrosine kinase 2, PTK2 protein tyrosine kinase 2, TYROSINE KINASE 2                                                                                                                                                                                                                                                                                                                                                                                                 |
| PXN          | AW108311, AW123232, FLJ23042, P, PAX, PAXILLIN                                                                                                                                                                                                                                                                                                                                                                                                                                                                                                                         |
| RHO          | GTPase Rho, Rho, Rho Family, RHO-GTPASE, Rho-like Gtpase                                                                                                                                                                                                                                                                                                                                                                                                                                                                                                               |
| RICTOR       | 4921505C17RIK, 6030405M08RIK, AVO3, AW492497, D530039E11RIK, hAVO3, KIAA1999, Mtorc2, PIA, RPTOR independent companion of MTOR complex 2, RPTOR independent companion of MTOR, complex 2                                                                                                                                                                                                                                                                                                                                                                               |
| RSU1         | LOC684929, R, Ras suppressor protein 1, rs, RSP-1, Rsul                                                                                                                                                                                                                                                                                                                                                                                                                                                                                                                |
| SNAI1        | AI194338, dJ710H13.1, S, SLUGH2, SNA, Sna1, SNAH, SNAIL, SNAIL1, snail family transcriptional repressor 1, snail family zinc finger 1                                                                                                                                                                                                                                                                                                                                                                                                                                  |
| SNAI2        | S, Si, Siu, SLUG, SLUGH, SLUGH1, SNAIL2, snail family transcriptional repressor 2, snail family zinc finger 2, WS2D                                                                                                                                                                                                                                                                                                                                                                                                                                                    |
| TESK1        | AI326901, p36-MBPk, testis associated actin remodelling kinase 1, testis specific protein kinase 1                                                                                                                                                                                                                                                                                                                                                                                                                                                                     |
| TGFB11       | AR, ARA55, hic-, HIC-5, TGF beta 111, TGF $\beta$ 111, transforming growth factor beta 1 induced transcript 1, transforming growth factor $\beta$ 1 induced transcript 1, TSC-, TSC-5                                                                                                                                                                                                                                                                                                                                                                                  |
| TMSB4        | TB4, THYMOSIN B4, Thymosin beta4, Thymosin $\beta$ 4, thymosin $\beta$ (4)                                                                                                                                                                                                                                                                                                                                                                                                                                                                                             |
| TNF          | AT-TNF, DI, DIF, RATTNF, TMTNF, Tn, TNF- $\alpha$ , TNF-alpha, Tnfs, Tnfs1a, TNFSF2, TNF- $\alpha$ , TNLG1F, tumor necrosis factor, Tumour Necrosis Factor $\alpha$ , tumor necrosis factor, $\alpha$ , tumour necrosis factor, tumour Necrosis Factor Alpha, tumour necrosis factor, alpha, tumour Necrosis Factor $\alpha$ , tumour necrosis factor, $\alpha$                                                                                                                                                                                                        |
| TNFRSF1A     | CD120, CD120a, FFP, p5, p55, p55-R, p55 TNF alpha receptor, p55 TNF $\alpha$ receptor, p60, TBP1, TN, TNF-, TNF- $\alpha$ , TNF $\alpha$ , TNF-alphaR1, Tnf alpha receptor p60, TNFAR, TNF-R, TNF-R1, Tnfr-2, TNF-R55, TNFR60, TNF receptor 1, TNF receptor superfamily member 1A, TNF-R-I, TNFRp55, Tnf- $\alpha$ Receptor 2, Tnf $\alpha$ receptor p60, Tnf $\alpha$ Receptor Type1, Tnf- $\alpha$ receptor type 1, tumor necrosis factor receptor superfamily, member 1a, tumour necrosis factor receptor 1, tumour necrosis factor receptor superfamily, member 1a |
| VCL          | 9430097D22, AA571387, AI462105, AW545629, CMD1W, CMH15, HEL114, MV, MVCL, Vcl predicted, Vinculin                                                                                                                                                                                                                                                                                                                                                                                                                                                                      |
| VIM          | PAL-E, Vimentin                                                                                                                                                                                                                                                                                                                                                                                                                                                                                                                                                        |



# Pathway Analysis Using IPA Software; canonical pathway

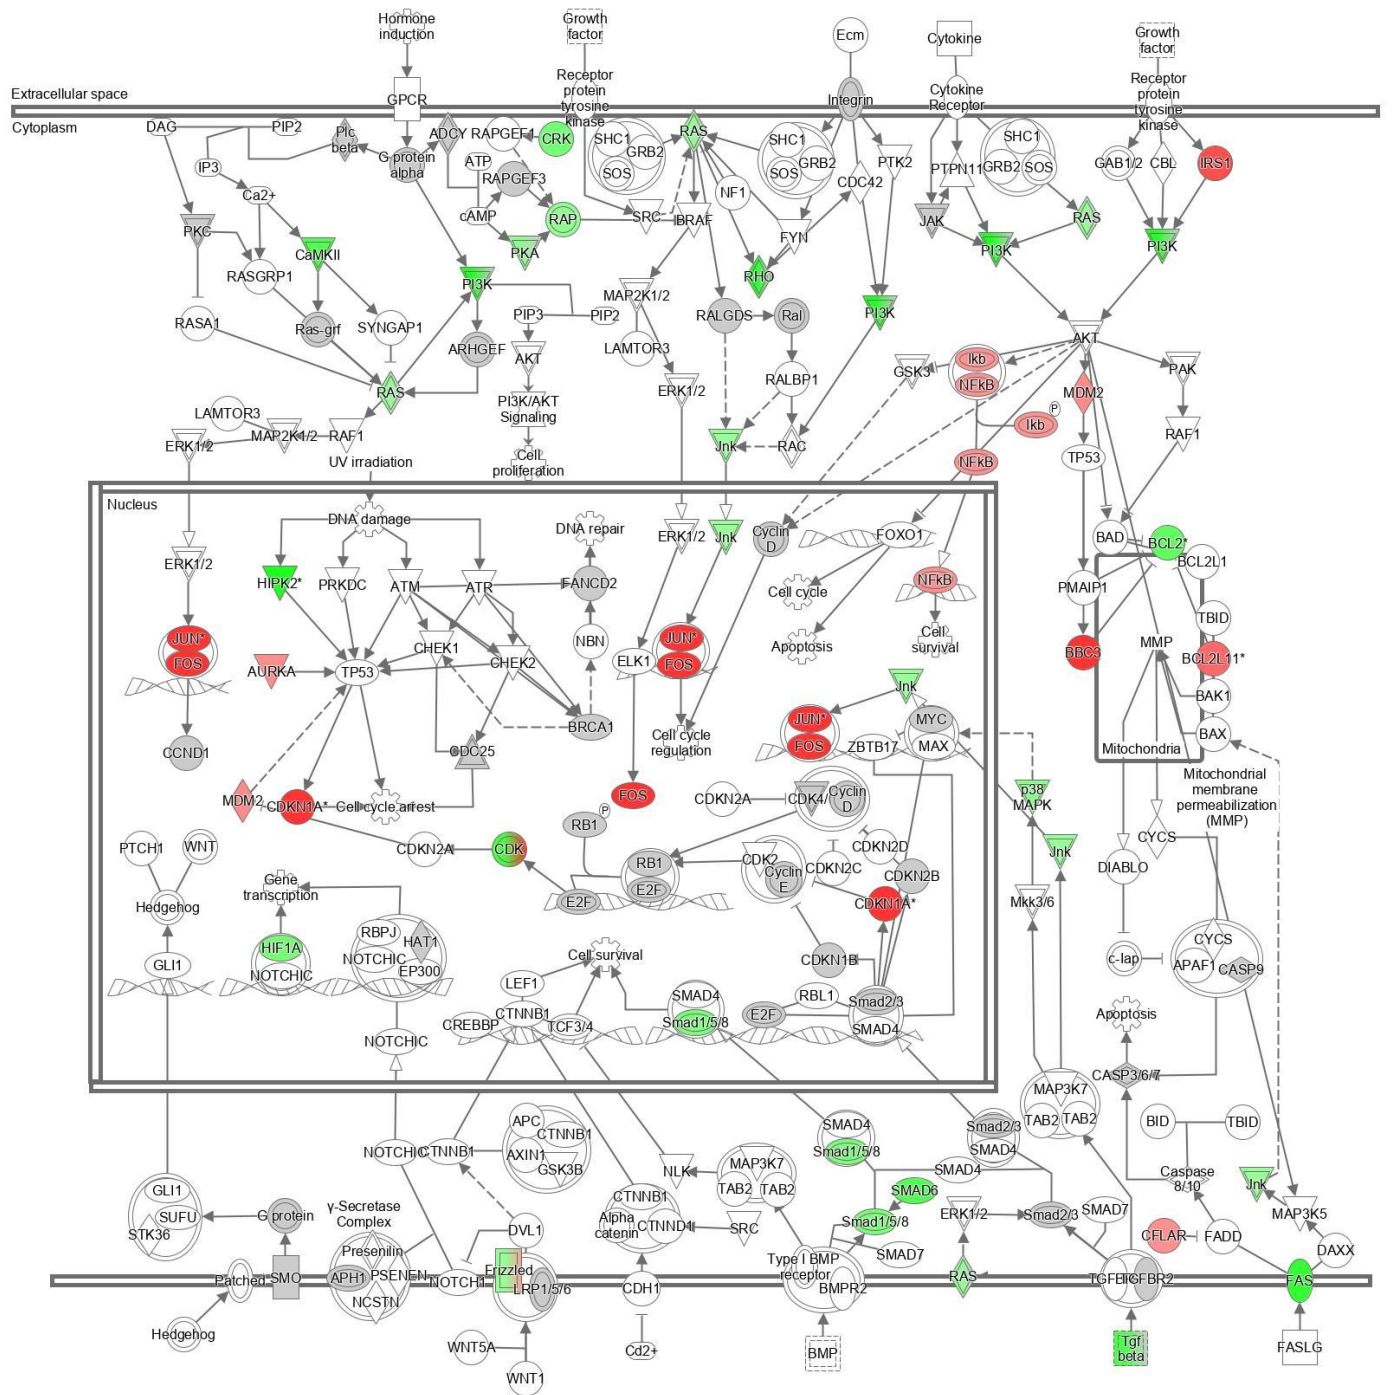

Figure S6. Molecular Mechanism of cancer at 1 h

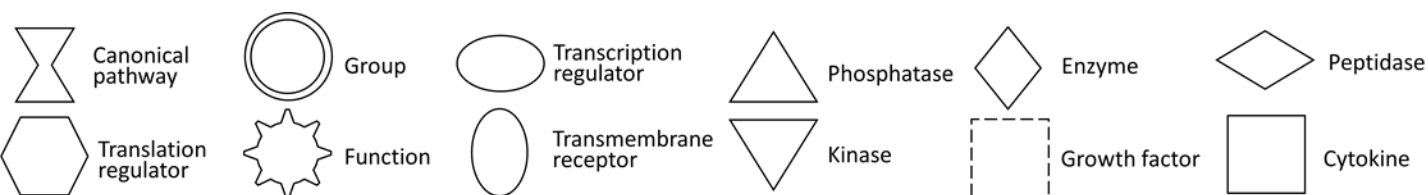

Red: Increased, FDR<0.05 versus solvent control

Green: Decreased, FDR<0.05 versus solvent control





| Symbol                         | Synonym(s)                                                                                                                                                                                                                                                                                                                                                                                                                                                                                                                                                                                                                                                                                                                                                                                                                                                                                                                                                                                                                                                                                                                                                                                                                                                                                                                                                                                                                                                                                                                                                                                                                                                                                                                                                                                                                                                                                                                                                                                                                                                                                                                                                                                                                                                                                                                                                                                                                                                                                                                                                                                                                                                                                                                                                                                                                                                                                                                                                                                                                                                                                                                                                                                                                                                                                                                                                                                                                                                                                                                                                                                                                                                                                                                                                                                                                                                                                                                                                                                                                                                                                                                                                                                                                                                                                                                                                                                                                                                                                                                                                                                                                                                                                                                                                                                                                                                                                                                                                                                                                                                                                                                                                                                                                                                                                                                                                                                                                                                                                                                                                                                                                                                                                                                                                                                                                                                                                                                                                                                                                                                                                                                                                                                                                                                                                                                                                                                                                                                                                                                                                                                                                                                                                                                                                                                                                                                                                                                                                                                                                                                                                                                                                                                                                                                                                                                                                                                                                                                                                                                                                                                                                                                                                                                                                                                                                                                                                                                                                                                                                                                                                                                                                                                                                                                                                                                                                                                                                                                                                                                                                                                                                                                                                                                                                                                                                                                                                                                                                                                                                                                                                                                                                                                                                                                                                                                                                                                                                                                                                                                                                                                                                                                                                                                                                                                                                                                                                                                                                                                                                                                                                                                                                                                                                                                                                                                                                                                                                                                                                                                                                                                                                                                                                                                                                                                                                                                                                                                                                                                                                                                                                                                                                                                                                                                                                                                                                                                                                                                           |
|--------------------------------|----------------------------------------------------------------------------------------------------------------------------------------------------------------------------------------------------------------------------------------------------------------------------------------------------------------------------------------------------------------------------------------------------------------------------------------------------------------------------------------------------------------------------------------------------------------------------------------------------------------------------------------------------------------------------------------------------------------------------------------------------------------------------------------------------------------------------------------------------------------------------------------------------------------------------------------------------------------------------------------------------------------------------------------------------------------------------------------------------------------------------------------------------------------------------------------------------------------------------------------------------------------------------------------------------------------------------------------------------------------------------------------------------------------------------------------------------------------------------------------------------------------------------------------------------------------------------------------------------------------------------------------------------------------------------------------------------------------------------------------------------------------------------------------------------------------------------------------------------------------------------------------------------------------------------------------------------------------------------------------------------------------------------------------------------------------------------------------------------------------------------------------------------------------------------------------------------------------------------------------------------------------------------------------------------------------------------------------------------------------------------------------------------------------------------------------------------------------------------------------------------------------------------------------------------------------------------------------------------------------------------------------------------------------------------------------------------------------------------------------------------------------------------------------------------------------------------------------------------------------------------------------------------------------------------------------------------------------------------------------------------------------------------------------------------------------------------------------------------------------------------------------------------------------------------------------------------------------------------------------------------------------------------------------------------------------------------------------------------------------------------------------------------------------------------------------------------------------------------------------------------------------------------------------------------------------------------------------------------------------------------------------------------------------------------------------------------------------------------------------------------------------------------------------------------------------------------------------------------------------------------------------------------------------------------------------------------------------------------------------------------------------------------------------------------------------------------------------------------------------------------------------------------------------------------------------------------------------------------------------------------------------------------------------------------------------------------------------------------------------------------------------------------------------------------------------------------------------------------------------------------------------------------------------------------------------------------------------------------------------------------------------------------------------------------------------------------------------------------------------------------------------------------------------------------------------------------------------------------------------------------------------------------------------------------------------------------------------------------------------------------------------------------------------------------------------------------------------------------------------------------------------------------------------------------------------------------------------------------------------------------------------------------------------------------------------------------------------------------------------------------------------------------------------------------------------------------------------------------------------------------------------------------------------------------------------------------------------------------------------------------------------------------------------------------------------------------------------------------------------------------------------------------------------------------------------------------------------------------------------------------------------------------------------------------------------------------------------------------------------------------------------------------------------------------------------------------------------------------------------------------------------------------------------------------------------------------------------------------------------------------------------------------------------------------------------------------------------------------------------------------------------------------------------------------------------------------------------------------------------------------------------------------------------------------------------------------------------------------------------------------------------------------------------------------------------------------------------------------------------------------------------------------------------------------------------------------------------------------------------------------------------------------------------------------------------------------------------------------------------------------------------------------------------------------------------------------------------------------------------------------------------------------------------------------------------------------------------------------------------------------------------------------------------------------------------------------------------------------------------------------------------------------------------------------------------------------------------------------------------------------------------------------------------------------------------------------------------------------------------------------------------------------------------------------------------------------------------------------------------------------------------------------------------------------------------------------------------------------------------------------------------------------------------------------------------------------------------------------------------------------------------------------------------------------------------------------------------------------------------------------------------------------------------------------------------------------------------------------------------------------------------------------------------------------------------------------------------------------------------------------------------------------------------------------------------------------------------------------------------------------------------------------------------------------------------------------------------------------------------------------------------------------------------------------------------------------------------------------------------------------------------------------------------------------------------------------------------------------------------------------------------------------------------------------------------------------------------------------------------------------------------------------------------------------------------------------------------------------------------------------------------------------------------------------------------------------------------------------------------------------------------------------------------------------------------------------------------------------------------------------------------------------------------------------------------------------------------------------------------------------------------------------------------------------------------------------------------------------------------------------------------------------------------------------------------------------------------------------------------------------------------------------------------------------------------------------------------------------------------------------------------------------------------------------------------------------------------------------------------------------------------------------------------------------------------------------------------------------------------------------------------------------------------------------------------------------------------------------------------------------------------------------------------------------------------------------------------------------------------------------------------------------------------------------------------------------------------------------------------------------------------------------------------------------------------------------------------------------------------------------------------------------------------------------------------------------------------------------------------------------------------------------------------------------------------------------------------------------------------------------------------------------------------------------------------------------------------------------------------------------------------------------------------------------------------------------------------------------------------------------------------------------------------------------------------------------------------------------------------------------------------------------------------------------------------------------------------------------------------------------------------------------------------------------------------------------------------------|
| HIF1alpha-NICD                 | HIF1α-NICD                                                                                                                                                                                                                                                                                                                                                                                                                                                                                                                                                                                                                                                                                                                                                                                                                                                                                                                                                                                                                                                                                                                                                                                                                                                                                                                                                                                                                                                                                                                                                                                                                                                                                                                                                                                                                                                                                                                                                                                                                                                                                                                                                                                                                                                                                                                                                                                                                                                                                                                                                                                                                                                                                                                                                                                                                                                                                                                                                                                                                                                                                                                                                                                                                                                                                                                                                                                                                                                                                                                                                                                                                                                                                                                                                                                                                                                                                                                                                                                                                                                                                                                                                                                                                                                                                                                                                                                                                                                                                                                                                                                                                                                                                                                                                                                                                                                                                                                                                                                                                                                                                                                                                                                                                                                                                                                                                                                                                                                                                                                                                                                                                                                                                                                                                                                                                                                                                                                                                                                                                                                                                                                                                                                                                                                                                                                                                                                                                                                                                                                                                                                                                                                                                                                                                                                                                                                                                                                                                                                                                                                                                                                                                                                                                                                                                                                                                                                                                                                                                                                                                                                                                                                                                                                                                                                                                                                                                                                                                                                                                                                                                                                                                                                                                                                                                                                                                                                                                                                                                                                                                                                                                                                                                                                                                                                                                                                                                                                                                                                                                                                                                                                                                                                                                                                                                                                                                                                                                                                                                                                                                                                                                                                                                                                                                                                                                                                                                                                                                                                                                                                                                                                                                                                                                                                                                                                                                                                                                                                                                                                                                                                                                                                                                                                                                                                                                                                                                                                                                                                                                                                                                                                                                                                                                                                                                                                                                                                                                                                           |
| HIPK2                          | 1110014O20RIK, B230339E18RIK, homeodomain interacting protein kinase 2, LOC100505582, LOC653052, PRO0593, St, Stank                                                                                                                                                                                                                                                                                                                                                                                                                                                                                                                                                                                                                                                                                                                                                                                                                                                                                                                                                                                                                                                                                                                                                                                                                                                                                                                                                                                                                                                                                                                                                                                                                                                                                                                                                                                                                                                                                                                                                                                                                                                                                                                                                                                                                                                                                                                                                                                                                                                                                                                                                                                                                                                                                                                                                                                                                                                                                                                                                                                                                                                                                                                                                                                                                                                                                                                                                                                                                                                                                                                                                                                                                                                                                                                                                                                                                                                                                                                                                                                                                                                                                                                                                                                                                                                                                                                                                                                                                                                                                                                                                                                                                                                                                                                                                                                                                                                                                                                                                                                                                                                                                                                                                                                                                                                                                                                                                                                                                                                                                                                                                                                                                                                                                                                                                                                                                                                                                                                                                                                                                                                                                                                                                                                                                                                                                                                                                                                                                                                                                                                                                                                                                                                                                                                                                                                                                                                                                                                                                                                                                                                                                                                                                                                                                                                                                                                                                                                                                                                                                                                                                                                                                                                                                                                                                                                                                                                                                                                                                                                                                                                                                                                                                                                                                                                                                                                                                                                                                                                                                                                                                                                                                                                                                                                                                                                                                                                                                                                                                                                                                                                                                                                                                                                                                                                                                                                                                                                                                                                                                                                                                                                                                                                                                                                                                                                                                                                                                                                                                                                                                                                                                                                                                                                                                                                                                                                                                                                                                                                                                                                                                                                                                                                                                                                                                                                                                                                                                                                                                                                                                                                                                                                                                                                                                                                                                                                                                  |
| Ikb                            | I KAPPA B, Ikbeta, IκB, Iκ-B                                                                                                                                                                                                                                                                                                                                                                                                                                                                                                                                                                                                                                                                                                                                                                                                                                                                                                                                                                                                                                                                                                                                                                                                                                                                                                                                                                                                                                                                                                                                                                                                                                                                                                                                                                                                                                                                                                                                                                                                                                                                                                                                                                                                                                                                                                                                                                                                                                                                                                                                                                                                                                                                                                                                                                                                                                                                                                                                                                                                                                                                                                                                                                                                                                                                                                                                                                                                                                                                                                                                                                                                                                                                                                                                                                                                                                                                                                                                                                                                                                                                                                                                                                                                                                                                                                                                                                                                                                                                                                                                                                                                                                                                                                                                                                                                                                                                                                                                                                                                                                                                                                                                                                                                                                                                                                                                                                                                                                                                                                                                                                                                                                                                                                                                                                                                                                                                                                                                                                                                                                                                                                                                                                                                                                                                                                                                                                                                                                                                                                                                                                                                                                                                                                                                                                                                                                                                                                                                                                                                                                                                                                                                                                                                                                                                                                                                                                                                                                                                                                                                                                                                                                                                                                                                                                                                                                                                                                                                                                                                                                                                                                                                                                                                                                                                                                                                                                                                                                                                                                                                                                                                                                                                                                                                                                                                                                                                                                                                                                                                                                                                                                                                                                                                                                                                                                                                                                                                                                                                                                                                                                                                                                                                                                                                                                                                                                                                                                                                                                                                                                                                                                                                                                                                                                                                                                                                                                                                                                                                                                                                                                                                                                                                                                                                                                                                                                                                                                                                                                                                                                                                                                                                                                                                                                                                                                                                                                                                                                         |
| IκB-NIKB                       | IkkappaB-NFkappaB, IκB-NFκB, NFκB-IκB                                                                                                                                                                                                                                                                                                                                                                                                                                                                                                                                                                                                                                                                                                                                                                                                                                                                                                                                                                                                                                                                                                                                                                                                                                                                                                                                                                                                                                                                                                                                                                                                                                                                                                                                                                                                                                                                                                                                                                                                                                                                                                                                                                                                                                                                                                                                                                                                                                                                                                                                                                                                                                                                                                                                                                                                                                                                                                                                                                                                                                                                                                                                                                                                                                                                                                                                                                                                                                                                                                                                                                                                                                                                                                                                                                                                                                                                                                                                                                                                                                                                                                                                                                                                                                                                                                                                                                                                                                                                                                                                                                                                                                                                                                                                                                                                                                                                                                                                                                                                                                                                                                                                                                                                                                                                                                                                                                                                                                                                                                                                                                                                                                                                                                                                                                                                                                                                                                                                                                                                                                                                                                                                                                                                                                                                                                                                                                                                                                                                                                                                                                                                                                                                                                                                                                                                                                                                                                                                                                                                                                                                                                                                                                                                                                                                                                                                                                                                                                                                                                                                                                                                                                                                                                                                                                                                                                                                                                                                                                                                                                                                                                                                                                                                                                                                                                                                                                                                                                                                                                                                                                                                                                                                                                                                                                                                                                                                                                                                                                                                                                                                                                                                                                                                                                                                                                                                                                                                                                                                                                                                                                                                                                                                                                                                                                                                                                                                                                                                                                                                                                                                                                                                                                                                                                                                                                                                                                                                                                                                                                                                                                                                                                                                                                                                                                                                                                                                                                                                                                                                                                                                                                                                                                                                                                                                                                                                                                                                                                |
| Integrin                       | Integrin alpha-beta, integrin-extracellular matrix, INTEGRIN receptor, Integrin α-β                                                                                                                                                                                                                                                                                                                                                                                                                                                                                                                                                                                                                                                                                                                                                                                                                                                                                                                                                                                                                                                                                                                                                                                                                                                                                                                                                                                                                                                                                                                                                                                                                                                                                                                                                                                                                                                                                                                                                                                                                                                                                                                                                                                                                                                                                                                                                                                                                                                                                                                                                                                                                                                                                                                                                                                                                                                                                                                                                                                                                                                                                                                                                                                                                                                                                                                                                                                                                                                                                                                                                                                                                                                                                                                                                                                                                                                                                                                                                                                                                                                                                                                                                                                                                                                                                                                                                                                                                                                                                                                                                                                                                                                                                                                                                                                                                                                                                                                                                                                                                                                                                                                                                                                                                                                                                                                                                                                                                                                                                                                                                                                                                                                                                                                                                                                                                                                                                                                                                                                                                                                                                                                                                                                                                                                                                                                                                                                                                                                                                                                                                                                                                                                                                                                                                                                                                                                                                                                                                                                                                                                                                                                                                                                                                                                                                                                                                                                                                                                                                                                                                                                                                                                                                                                                                                                                                                                                                                                                                                                                                                                                                                                                                                                                                                                                                                                                                                                                                                                                                                                                                                                                                                                                                                                                                                                                                                                                                                                                                                                                                                                                                                                                                                                                                                                                                                                                                                                                                                                                                                                                                                                                                                                                                                                                                                                                                                                                                                                                                                                                                                                                                                                                                                                                                                                                                                                                                                                                                                                                                                                                                                                                                                                                                                                                                                                                                                                                                                                                                                                                                                                                                                                                                                                                                                                                                                                                                                                  |
| IP3                            | 27121-73-9, inositol trisphosphate, IP3, myo-inositol, tris(dihydrogen phosphate)                                                                                                                                                                                                                                                                                                                                                                                                                                                                                                                                                                                                                                                                                                                                                                                                                                                                                                                                                                                                                                                                                                                                                                                                                                                                                                                                                                                                                                                                                                                                                                                                                                                                                                                                                                                                                                                                                                                                                                                                                                                                                                                                                                                                                                                                                                                                                                                                                                                                                                                                                                                                                                                                                                                                                                                                                                                                                                                                                                                                                                                                                                                                                                                                                                                                                                                                                                                                                                                                                                                                                                                                                                                                                                                                                                                                                                                                                                                                                                                                                                                                                                                                                                                                                                                                                                                                                                                                                                                                                                                                                                                                                                                                                                                                                                                                                                                                                                                                                                                                                                                                                                                                                                                                                                                                                                                                                                                                                                                                                                                                                                                                                                                                                                                                                                                                                                                                                                                                                                                                                                                                                                                                                                                                                                                                                                                                                                                                                                                                                                                                                                                                                                                                                                                                                                                                                                                                                                                                                                                                                                                                                                                                                                                                                                                                                                                                                                                                                                                                                                                                                                                                                                                                                                                                                                                                                                                                                                                                                                                                                                                                                                                                                                                                                                                                                                                                                                                                                                                                                                                                                                                                                                                                                                                                                                                                                                                                                                                                                                                                                                                                                                                                                                                                                                                                                                                                                                                                                                                                                                                                                                                                                                                                                                                                                                                                                                                                                                                                                                                                                                                                                                                                                                                                                                                                                                                                                                                                                                                                                                                                                                                                                                                                                                                                                                                                                                                                                                                                                                                                                                                                                                                                                                                                                                                                                                                                                                                    |
| IRS1                           | ENSMUSG00000022591, G972, G972R, HIRS-1, insulin receptor substrate 1, IR, IRS1IRM                                                                                                                                                                                                                                                                                                                                                                                                                                                                                                                                                                                                                                                                                                                                                                                                                                                                                                                                                                                                                                                                                                                                                                                                                                                                                                                                                                                                                                                                                                                                                                                                                                                                                                                                                                                                                                                                                                                                                                                                                                                                                                                                                                                                                                                                                                                                                                                                                                                                                                                                                                                                                                                                                                                                                                                                                                                                                                                                                                                                                                                                                                                                                                                                                                                                                                                                                                                                                                                                                                                                                                                                                                                                                                                                                                                                                                                                                                                                                                                                                                                                                                                                                                                                                                                                                                                                                                                                                                                                                                                                                                                                                                                                                                                                                                                                                                                                                                                                                                                                                                                                                                                                                                                                                                                                                                                                                                                                                                                                                                                                                                                                                                                                                                                                                                                                                                                                                                                                                                                                                                                                                                                                                                                                                                                                                                                                                                                                                                                                                                                                                                                                                                                                                                                                                                                                                                                                                                                                                                                                                                                                                                                                                                                                                                                                                                                                                                                                                                                                                                                                                                                                                                                                                                                                                                                                                                                                                                                                                                                                                                                                                                                                                                                                                                                                                                                                                                                                                                                                                                                                                                                                                                                                                                                                                                                                                                                                                                                                                                                                                                                                                                                                                                                                                                                                                                                                                                                                                                                                                                                                                                                                                                                                                                                                                                                                                                                                                                                                                                                                                                                                                                                                                                                                                                                                                                                                                                                                                                                                                                                                                                                                                                                                                                                                                                                                                                                                                                                                                                                                                                                                                                                                                                                                                                                                                                                                                                                   |
| JAK                            | JAK kinase                                                                                                                                                                                                                                                                                                                                                                                                                                                                                                                                                                                                                                                                                                                                                                                                                                                                                                                                                                                                                                                                                                                                                                                                                                                                                                                                                                                                                                                                                                                                                                                                                                                                                                                                                                                                                                                                                                                                                                                                                                                                                                                                                                                                                                                                                                                                                                                                                                                                                                                                                                                                                                                                                                                                                                                                                                                                                                                                                                                                                                                                                                                                                                                                                                                                                                                                                                                                                                                                                                                                                                                                                                                                                                                                                                                                                                                                                                                                                                                                                                                                                                                                                                                                                                                                                                                                                                                                                                                                                                                                                                                                                                                                                                                                                                                                                                                                                                                                                                                                                                                                                                                                                                                                                                                                                                                                                                                                                                                                                                                                                                                                                                                                                                                                                                                                                                                                                                                                                                                                                                                                                                                                                                                                                                                                                                                                                                                                                                                                                                                                                                                                                                                                                                                                                                                                                                                                                                                                                                                                                                                                                                                                                                                                                                                                                                                                                                                                                                                                                                                                                                                                                                                                                                                                                                                                                                                                                                                                                                                                                                                                                                                                                                                                                                                                                                                                                                                                                                                                                                                                                                                                                                                                                                                                                                                                                                                                                                                                                                                                                                                                                                                                                                                                                                                                                                                                                                                                                                                                                                                                                                                                                                                                                                                                                                                                                                                                                                                                                                                                                                                                                                                                                                                                                                                                                                                                                                                                                                                                                                                                                                                                                                                                                                                                                                                                                                                                                                                                                                                                                                                                                                                                                                                                                                                                                                                                                                                                                                                           |
| Jnk                            | JNK 54/46, Jnk p56, JNK/SAPK, JUN KINASE, p40, p47, Sapk/Jnk                                                                                                                                                                                                                                                                                                                                                                                                                                                                                                                                                                                                                                                                                                                                                                                                                                                                                                                                                                                                                                                                                                                                                                                                                                                                                                                                                                                                                                                                                                                                                                                                                                                                                                                                                                                                                                                                                                                                                                                                                                                                                                                                                                                                                                                                                                                                                                                                                                                                                                                                                                                                                                                                                                                                                                                                                                                                                                                                                                                                                                                                                                                                                                                                                                                                                                                                                                                                                                                                                                                                                                                                                                                                                                                                                                                                                                                                                                                                                                                                                                                                                                                                                                                                                                                                                                                                                                                                                                                                                                                                                                                                                                                                                                                                                                                                                                                                                                                                                                                                                                                                                                                                                                                                                                                                                                                                                                                                                                                                                                                                                                                                                                                                                                                                                                                                                                                                                                                                                                                                                                                                                                                                                                                                                                                                                                                                                                                                                                                                                                                                                                                                                                                                                                                                                                                                                                                                                                                                                                                                                                                                                                                                                                                                                                                                                                                                                                                                                                                                                                                                                                                                                                                                                                                                                                                                                                                                                                                                                                                                                                                                                                                                                                                                                                                                                                                                                                                                                                                                                                                                                                                                                                                                                                                                                                                                                                                                                                                                                                                                                                                                                                                                                                                                                                                                                                                                                                                                                                                                                                                                                                                                                                                                                                                                                                                                                                                                                                                                                                                                                                                                                                                                                                                                                                                                                                                                                                                                                                                                                                                                                                                                                                                                                                                                                                                                                                                                                                                                                                                                                                                                                                                                                                                                                                                                                                                                                                                                         |
| JUN                            | Activator protein 1, AP-1, AP-1, c-jun, cJUN, Junc, jun proto-oncogene, Jun proto-oncogene, AP-1 transcription factor subunit, LOC100288387, LOC100291417, LOC100293034, p39, vJunc, V-jun Avian Sarcoma Virus 17 Oncogene Homolog, V-jun Sarcoma Virus 17 Oncogene Homolog                                                                                                                                                                                                                                                                                                                                                                                                                                                                                                                                                                                                                                                                                                                                                                                                                                                                                                                                                                                                                                                                                                                                                                                                                                                                                                                                                                                                                                                                                                                                                                                                                                                                                                                                                                                                                                                                                                                                                                                                                                                                                                                                                                                                                                                                                                                                                                                                                                                                                                                                                                                                                                                                                                                                                                                                                                                                                                                                                                                                                                                                                                                                                                                                                                                                                                                                                                                                                                                                                                                                                                                                                                                                                                                                                                                                                                                                                                                                                                                                                                                                                                                                                                                                                                                                                                                                                                                                                                                                                                                                                                                                                                                                                                                                                                                                                                                                                                                                                                                                                                                                                                                                                                                                                                                                                                                                                                                                                                                                                                                                                                                                                                                                                                                                                                                                                                                                                                                                                                                                                                                                                                                                                                                                                                                                                                                                                                                                                                                                                                                                                                                                                                                                                                                                                                                                                                                                                                                                                                                                                                                                                                                                                                                                                                                                                                                                                                                                                                                                                                                                                                                                                                                                                                                                                                                                                                                                                                                                                                                                                                                                                                                                                                                                                                                                                                                                                                                                                                                                                                                                                                                                                                                                                                                                                                                                                                                                                                                                                                                                                                                                                                                                                                                                                                                                                                                                                                                                                                                                                                                                                                                                                                                                                                                                                                                                                                                                                                                                                                                                                                                                                                                                                                                                                                                                                                                                                                                                                                                                                                                                                                                                                                                                                                                                                                                                                                                                                                                                                                                                                                                                                                                                                                                          |
| LAMTOR3                        | AW556229, late endosomal/lysosomal adaptor, MAPK and MTOR activator 3, LOC100132990, Map, Map2k, MAP2K1IP1, MAPBP, MAPKSP1, Mek binding partner 1, Mp, MP1, PRO0633, Ragulator3                                                                                                                                                                                                                                                                                                                                                                                                                                                                                                                                                                                                                                                                                                                                                                                                                                                                                                                                                                                                                                                                                                                                                                                                                                                                                                                                                                                                                                                                                                                                                                                                                                                                                                                                                                                                                                                                                                                                                                                                                                                                                                                                                                                                                                                                                                                                                                                                                                                                                                                                                                                                                                                                                                                                                                                                                                                                                                                                                                                                                                                                                                                                                                                                                                                                                                                                                                                                                                                                                                                                                                                                                                                                                                                                                                                                                                                                                                                                                                                                                                                                                                                                                                                                                                                                                                                                                                                                                                                                                                                                                                                                                                                                                                                                                                                                                                                                                                                                                                                                                                                                                                                                                                                                                                                                                                                                                                                                                                                                                                                                                                                                                                                                                                                                                                                                                                                                                                                                                                                                                                                                                                                                                                                                                                                                                                                                                                                                                                                                                                                                                                                                                                                                                                                                                                                                                                                                                                                                                                                                                                                                                                                                                                                                                                                                                                                                                                                                                                                                                                                                                                                                                                                                                                                                                                                                                                                                                                                                                                                                                                                                                                                                                                                                                                                                                                                                                                                                                                                                                                                                                                                                                                                                                                                                                                                                                                                                                                                                                                                                                                                                                                                                                                                                                                                                                                                                                                                                                                                                                                                                                                                                                                                                                                                                                                                                                                                                                                                                                                                                                                                                                                                                                                                                                                                                                                                                                                                                                                                                                                                                                                                                                                                                                                                                                                                                                                                                                                                                                                                                                                                                                                                                                                                                                                                                                      |
| LEF1                           | 3000002B05, AH451430, Lef, lymphoid enhancer binding factor 1, TCF10, TCF1ALPHA, TCF7L3, TCF/LEF                                                                                                                                                                                                                                                                                                                                                                                                                                                                                                                                                                                                                                                                                                                                                                                                                                                                                                                                                                                                                                                                                                                                                                                                                                                                                                                                                                                                                                                                                                                                                                                                                                                                                                                                                                                                                                                                                                                                                                                                                                                                                                                                                                                                                                                                                                                                                                                                                                                                                                                                                                                                                                                                                                                                                                                                                                                                                                                                                                                                                                                                                                                                                                                                                                                                                                                                                                                                                                                                                                                                                                                                                                                                                                                                                                                                                                                                                                                                                                                                                                                                                                                                                                                                                                                                                                                                                                                                                                                                                                                                                                                                                                                                                                                                                                                                                                                                                                                                                                                                                                                                                                                                                                                                                                                                                                                                                                                                                                                                                                                                                                                                                                                                                                                                                                                                                                                                                                                                                                                                                                                                                                                                                                                                                                                                                                                                                                                                                                                                                                                                                                                                                                                                                                                                                                                                                                                                                                                                                                                                                                                                                                                                                                                                                                                                                                                                                                                                                                                                                                                                                                                                                                                                                                                                                                                                                                                                                                                                                                                                                                                                                                                                                                                                                                                                                                                                                                                                                                                                                                                                                                                                                                                                                                                                                                                                                                                                                                                                                                                                                                                                                                                                                                                                                                                                                                                                                                                                                                                                                                                                                                                                                                                                                                                                                                                                                                                                                                                                                                                                                                                                                                                                                                                                                                                                                                                                                                                                                                                                                                                                                                                                                                                                                                                                                                                                                                                                                                                                                                                                                                                                                                                                                                                                                                                                                                                                                                     |
| MAP2K1/2                       | MEK1/2, MKK1/2                                                                                                                                                                                                                                                                                                                                                                                                                                                                                                                                                                                                                                                                                                                                                                                                                                                                                                                                                                                                                                                                                                                                                                                                                                                                                                                                                                                                                                                                                                                                                                                                                                                                                                                                                                                                                                                                                                                                                                                                                                                                                                                                                                                                                                                                                                                                                                                                                                                                                                                                                                                                                                                                                                                                                                                                                                                                                                                                                                                                                                                                                                                                                                                                                                                                                                                                                                                                                                                                                                                                                                                                                                                                                                                                                                                                                                                                                                                                                                                                                                                                                                                                                                                                                                                                                                                                                                                                                                                                                                                                                                                                                                                                                                                                                                                                                                                                                                                                                                                                                                                                                                                                                                                                                                                                                                                                                                                                                                                                                                                                                                                                                                                                                                                                                                                                                                                                                                                                                                                                                                                                                                                                                                                                                                                                                                                                                                                                                                                                                                                                                                                                                                                                                                                                                                                                                                                                                                                                                                                                                                                                                                                                                                                                                                                                                                                                                                                                                                                                                                                                                                                                                                                                                                                                                                                                                                                                                                                                                                                                                                                                                                                                                                                                                                                                                                                                                                                                                                                                                                                                                                                                                                                                                                                                                                                                                                                                                                                                                                                                                                                                                                                                                                                                                                                                                                                                                                                                                                                                                                                                                                                                                                                                                                                                                                                                                                                                                                                                                                                                                                                                                                                                                                                                                                                                                                                                                                                                                                                                                                                                                                                                                                                                                                                                                                                                                                                                                                                                                                                                                                                                                                                                                                                                                                                                                                                                                                                                                                                       |
| MAP3K5                         | 7420452D20RIK, A, APOPTOSIS SIGNAL REGULATED KINASE 1, AS, ASK, ASK1, M3K5, MAPKKK5, MEKK5, mitogen-activated protein kinase kinase kinase 5, RGD1306565                                                                                                                                                                                                                                                                                                                                                                                                                                                                                                                                                                                                                                                                                                                                                                                                                                                                                                                                                                                                                                                                                                                                                                                                                                                                                                                                                                                                                                                                                                                                                                                                                                                                                                                                                                                                                                                                                                                                                                                                                                                                                                                                                                                                                                                                                                                                                                                                                                                                                                                                                                                                                                                                                                                                                                                                                                                                                                                                                                                                                                                                                                                                                                                                                                                                                                                                                                                                                                                                                                                                                                                                                                                                                                                                                                                                                                                                                                                                                                                                                                                                                                                                                                                                                                                                                                                                                                                                                                                                                                                                                                                                                                                                                                                                                                                                                                                                                                                                                                                                                                                                                                                                                                                                                                                                                                                                                                                                                                                                                                                                                                                                                                                                                                                                                                                                                                                                                                                                                                                                                                                                                                                                                                                                                                                                                                                                                                                                                                                                                                                                                                                                                                                                                                                                                                                                                                                                                                                                                                                                                                                                                                                                                                                                                                                                                                                                                                                                                                                                                                                                                                                                                                                                                                                                                                                                                                                                                                                                                                                                                                                                                                                                                                                                                                                                                                                                                                                                                                                                                                                                                                                                                                                                                                                                                                                                                                                                                                                                                                                                                                                                                                                                                                                                                                                                                                                                                                                                                                                                                                                                                                                                                                                                                                                                                                                                                                                                                                                                                                                                                                                                                                                                                                                                                                                                                                                                                                                                                                                                                                                                                                                                                                                                                                                                                                                                                                                                                                                                                                                                                                                                                                                                                                                                                                                                                                             |
| MAP3K7                         | CSCF, FMD2, Map3k7 predicted, MEKK7, mitogen-activated protein kinase kinase kinase 7, TAK1, TGF1a, tgf β activated kinase 1                                                                                                                                                                                                                                                                                                                                                                                                                                                                                                                                                                                                                                                                                                                                                                                                                                                                                                                                                                                                                                                                                                                                                                                                                                                                                                                                                                                                                                                                                                                                                                                                                                                                                                                                                                                                                                                                                                                                                                                                                                                                                                                                                                                                                                                                                                                                                                                                                                                                                                                                                                                                                                                                                                                                                                                                                                                                                                                                                                                                                                                                                                                                                                                                                                                                                                                                                                                                                                                                                                                                                                                                                                                                                                                                                                                                                                                                                                                                                                                                                                                                                                                                                                                                                                                                                                                                                                                                                                                                                                                                                                                                                                                                                                                                                                                                                                                                                                                                                                                                                                                                                                                                                                                                                                                                                                                                                                                                                                                                                                                                                                                                                                                                                                                                                                                                                                                                                                                                                                                                                                                                                                                                                                                                                                                                                                                                                                                                                                                                                                                                                                                                                                                                                                                                                                                                                                                                                                                                                                                                                                                                                                                                                                                                                                                                                                                                                                                                                                                                                                                                                                                                                                                                                                                                                                                                                                                                                                                                                                                                                                                                                                                                                                                                                                                                                                                                                                                                                                                                                                                                                                                                                                                                                                                                                                                                                                                                                                                                                                                                                                                                                                                                                                                                                                                                                                                                                                                                                                                                                                                                                                                                                                                                                                                                                                                                                                                                                                                                                                                                                                                                                                                                                                                                                                                                                                                                                                                                                                                                                                                                                                                                                                                                                                                                                                                                                                                                                                                                                                                                                                                                                                                                                                                                                                                                                                                                         |
| Map3k7-<br>Map3k7ip1-          | Tab1-Tab2-Tak1                                                                                                                                                                                                                                                                                                                                                                                                                                                                                                                                                                                                                                                                                                                                                                                                                                                                                                                                                                                                                                                                                                                                                                                                                                                                                                                                                                                                                                                                                                                                                                                                                                                                                                                                                                                                                                                                                                                                                                                                                                                                                                                                                                                                                                                                                                                                                                                                                                                                                                                                                                                                                                                                                                                                                                                                                                                                                                                                                                                                                                                                                                                                                                                                                                                                                                                                                                                                                                                                                                                                                                                                                                                                                                                                                                                                                                                                                                                                                                                                                                                                                                                                                                                                                                                                                                                                                                                                                                                                                                                                                                                                                                                                                                                                                                                                                                                                                                                                                                                                                                                                                                                                                                                                                                                                                                                                                                                                                                                                                                                                                                                                                                                                                                                                                                                                                                                                                                                                                                                                                                                                                                                                                                                                                                                                                                                                                                                                                                                                                                                                                                                                                                                                                                                                                                                                                                                                                                                                                                                                                                                                                                                                                                                                                                                                                                                                                                                                                                                                                                                                                                                                                                                                                                                                                                                                                                                                                                                                                                                                                                                                                                                                                                                                                                                                                                                                                                                                                                                                                                                                                                                                                                                                                                                                                                                                                                                                                                                                                                                                                                                                                                                                                                                                                                                                                                                                                                                                                                                                                                                                                                                                                                                                                                                                                                                                                                                                                                                                                                                                                                                                                                                                                                                                                                                                                                                                                                                                                                                                                                                                                                                                                                                                                                                                                                                                                                                                                                                                                                                                                                                                                                                                                                                                                                                                                                                                                                                                                                                       |
| MAX                            | AA960152, A1875693, bHLHd, bHLHd4, bHLHd5, bHLHd6, bHLHd7, bHLHd8, Max protein, MYC associated factor X, Myn                                                                                                                                                                                                                                                                                                                                                                                                                                                                                                                                                                                                                                                                                                                                                                                                                                                                                                                                                                                                                                                                                                                                                                                                                                                                                                                                                                                                                                                                                                                                                                                                                                                                                                                                                                                                                                                                                                                                                                                                                                                                                                                                                                                                                                                                                                                                                                                                                                                                                                                                                                                                                                                                                                                                                                                                                                                                                                                                                                                                                                                                                                                                                                                                                                                                                                                                                                                                                                                                                                                                                                                                                                                                                                                                                                                                                                                                                                                                                                                                                                                                                                                                                                                                                                                                                                                                                                                                                                                                                                                                                                                                                                                                                                                                                                                                                                                                                                                                                                                                                                                                                                                                                                                                                                                                                                                                                                                                                                                                                                                                                                                                                                                                                                                                                                                                                                                                                                                                                                                                                                                                                                                                                                                                                                                                                                                                                                                                                                                                                                                                                                                                                                                                                                                                                                                                                                                                                                                                                                                                                                                                                                                                                                                                                                                                                                                                                                                                                                                                                                                                                                                                                                                                                                                                                                                                                                                                                                                                                                                                                                                                                                                                                                                                                                                                                                                                                                                                                                                                                                                                                                                                                                                                                                                                                                                                                                                                                                                                                                                                                                                                                                                                                                                                                                                                                                                                                                                                                                                                                                                                                                                                                                                                                                                                                                                                                                                                                                                                                                                                                                                                                                                                                                                                                                                                                                                                                                                                                                                                                                                                                                                                                                                                                                                                                                                                                                                                                                                                                                                                                                                                                                                                                                                                                                                                                                                                                         |
| Max-Myc                        | cMyc-MAX Myc-MAX                                                                                                                                                                                                                                                                                                                                                                                                                                                                                                                                                                                                                                                                                                                                                                                                                                                                                                                                                                                                                                                                                                                                                                                                                                                                                                                                                                                                                                                                                                                                                                                                                                                                                                                                                                                                                                                                                                                                                                                                                                                                                                                                                                                                                                                                                                                                                                                                                                                                                                                                                                                                                                                                                                                                                                                                                                                                                                                                                                                                                                                                                                                                                                                                                                                                                                                                                                                                                                                                                                                                                                                                                                                                                                                                                                                                                                                                                                                                                                                                                                                                                                                                                                                                                                                                                                                                                                                                                                                                                                                                                                                                                                                                                                                                                                                                                                                                                                                                                                                                                                                                                                                                                                                                                                                                                                                                                                                                                                                                                                                                                                                                                                                                                                                                                                                                                                                                                                                                                                                                                                                                                                                                                                                                                                                                                                                                                                                                                                                                                                                                                                                                                                                                                                                                                                                                                                                                                                                                                                                                                                                                                                                                                                                                                                                                                                                                                                                                                                                                                                                                                                                                                                                                                                                                                                                                                                                                                                                                                                                                                                                                                                                                                                                                                                                                                                                                                                                                                                                                                                                                                                                                                                                                                                                                                                                                                                                                                                                                                                                                                                                                                                                                                                                                                                                                                                                                                                                                                                                                                                                                                                                                                                                                                                                                                                                                                                                                                                                                                                                                                                                                                                                                                                                                                                                                                                                                                                                                                                                                                                                                                                                                                                                                                                                                                                                                                                                                                                                                                                                                                                                                                                                                                                                                                                                                                                                                                                                                                                                     |
| MDM2                           | 1700007J15RIK, AA415488, ACTFS, hdm2, HDMX, LSKB, MDM2-A1, MDM2 proto-oncogene, MGC5370, Transformed 3T3 cell double minute 2, transformed mouse 3T3 cell double minute 2                                                                                                                                                                                                                                                                                                                                                                                                                                                                                                                                                                                                                                                                                                                                                                                                                                                                                                                                                                                                                                                                                                                                                                                                                                                                                                                                                                                                                                                                                                                                                                                                                                                                                                                                                                                                                                                                                                                                                                                                                                                                                                                                                                                                                                                                                                                                                                                                                                                                                                                                                                                                                                                                                                                                                                                                                                                                                                                                                                                                                                                                                                                                                                                                                                                                                                                                                                                                                                                                                                                                                                                                                                                                                                                                                                                                                                                                                                                                                                                                                                                                                                                                                                                                                                                                                                                                                                                                                                                                                                                                                                                                                                                                                                                                                                                                                                                                                                                                                                                                                                                                                                                                                                                                                                                                                                                                                                                                                                                                                                                                                                                                                                                                                                                                                                                                                                                                                                                                                                                                                                                                                                                                                                                                                                                                                                                                                                                                                                                                                                                                                                                                                                                                                                                                                                                                                                                                                                                                                                                                                                                                                                                                                                                                                                                                                                                                                                                                                                                                                                                                                                                                                                                                                                                                                                                                                                                                                                                                                                                                                                                                                                                                                                                                                                                                                                                                                                                                                                                                                                                                                                                                                                                                                                                                                                                                                                                                                                                                                                                                                                                                                                                                                                                                                                                                                                                                                                                                                                                                                                                                                                                                                                                                                                                                                                                                                                                                                                                                                                                                                                                                                                                                                                                                                                                                                                                                                                                                                                                                                                                                                                                                                                                                                                                                                                                                                                                                                                                                                                                                                                                                                                                                                                                                                                                                                            |
| Mkk3/6                         | MEK3/6, Mkk3/6 (mitogen activated protein kinase kinase 3/6), MKK3/MKK6                                                                                                                                                                                                                                                                                                                                                                                                                                                                                                                                                                                                                                                                                                                                                                                                                                                                                                                                                                                                                                                                                                                                                                                                                                                                                                                                                                                                                                                                                                                                                                                                                                                                                                                                                                                                                                                                                                                                                                                                                                                                                                                                                                                                                                                                                                                                                                                                                                                                                                                                                                                                                                                                                                                                                                                                                                                                                                                                                                                                                                                                                                                                                                                                                                                                                                                                                                                                                                                                                                                                                                                                                                                                                                                                                                                                                                                                                                                                                                                                                                                                                                                                                                                                                                                                                                                                                                                                                                                                                                                                                                                                                                                                                                                                                                                                                                                                                                                                                                                                                                                                                                                                                                                                                                                                                                                                                                                                                                                                                                                                                                                                                                                                                                                                                                                                                                                                                                                                                                                                                                                                                                                                                                                                                                                                                                                                                                                                                                                                                                                                                                                                                                                                                                                                                                                                                                                                                                                                                                                                                                                                                                                                                                                                                                                                                                                                                                                                                                                                                                                                                                                                                                                                                                                                                                                                                                                                                                                                                                                                                                                                                                                                                                                                                                                                                                                                                                                                                                                                                                                                                                                                                                                                                                                                                                                                                                                                                                                                                                                                                                                                                                                                                                                                                                                                                                                                                                                                                                                                                                                                                                                                                                                                                                                                                                                                                                                                                                                                                                                                                                                                                                                                                                                                                                                                                                                                                                                                                                                                                                                                                                                                                                                                                                                                                                                                                                                                                                                                                                                                                                                                                                                                                                                                                                                                                                                                                                                              |
| MYC                            | AU016757, bHLHe3, bHLHe39, CMYC, C-MYC-P64, mMyc, MRTL, Myc2, MYCC, MYC proto-oncogene, bHLH transcription factor, myelocytomatosis oncogene, N, Niard, Nird, RNCMYC                                                                                                                                                                                                                                                                                                                                                                                                                                                                                                                                                                                                                                                                                                                                                                                                                                                                                                                                                                                                                                                                                                                                                                                                                                                                                                                                                                                                                                                                                                                                                                                                                                                                                                                                                                                                                                                                                                                                                                                                                                                                                                                                                                                                                                                                                                                                                                                                                                                                                                                                                                                                                                                                                                                                                                                                                                                                                                                                                                                                                                                                                                                                                                                                                                                                                                                                                                                                                                                                                                                                                                                                                                                                                                                                                                                                                                                                                                                                                                                                                                                                                                                                                                                                                                                                                                                                                                                                                                                                                                                                                                                                                                                                                                                                                                                                                                                                                                                                                                                                                                                                                                                                                                                                                                                                                                                                                                                                                                                                                                                                                                                                                                                                                                                                                                                                                                                                                                                                                                                                                                                                                                                                                                                                                                                                                                                                                                                                                                                                                                                                                                                                                                                                                                                                                                                                                                                                                                                                                                                                                                                                                                                                                                                                                                                                                                                                                                                                                                                                                                                                                                                                                                                                                                                                                                                                                                                                                                                                                                                                                                                                                                                                                                                                                                                                                                                                                                                                                                                                                                                                                                                                                                                                                                                                                                                                                                                                                                                                                                                                                                                                                                                                                                                                                                                                                                                                                                                                                                                                                                                                                                                                                                                                                                                                                                                                                                                                                                                                                                                                                                                                                                                                                                                                                                                                                                                                                                                                                                                                                                                                                                                                                                                                                                                                                                                                                                                                                                                                                                                                                                                                                                                                                                                                                                                                                                 |
| NBN                            | ATV, AT-V1, AT-V2, Nb, NBS, NBS1, NIBRIN, P95                                                                                                                                                                                                                                                                                                                                                                                                                                                                                                                                                                                                                                                                                                                                                                                                                                                                                                                                                                                                                                                                                                                                                                                                                                                                                                                                                                                                                                                                                                                                                                                                                                                                                                                                                                                                                                                                                                                                                                                                                                                                                                                                                                                                                                                                                                                                                                                                                                                                                                                                                                                                                                                                                                                                                                                                                                                                                                                                                                                                                                                                                                                                                                                                                                                                                                                                                                                                                                                                                                                                                                                                                                                                                                                                                                                                                                                                                                                                                                                                                                                                                                                                                                                                                                                                                                                                                                                                                                                                                                                                                                                                                                                                                                                                                                                                                                                                                                                                                                                                                                                                                                                                                                                                                                                                                                                                                                                                                                                                                                                                                                                                                                                                                                                                                                                                                                                                                                                                                                                                                                                                                                                                                                                                                                                                                                                                                                                                                                                                                                                                                                                                                                                                                                                                                                                                                                                                                                                                                                                                                                                                                                                                                                                                                                                                                                                                                                                                                                                                                                                                                                                                                                                                                                                                                                                                                                                                                                                                                                                                                                                                                                                                                                                                                                                                                                                                                                                                                                                                                                                                                                                                                                                                                                                                                                                                                                                                                                                                                                                                                                                                                                                                                                                                                                                                                                                                                                                                                                                                                                                                                                                                                                                                                                                                                                                                                                                                                                                                                                                                                                                                                                                                                                                                                                                                                                                                                                                                                                                                                                                                                                                                                                                                                                                                                                                                                                                                                                                                                                                                                                                                                                                                                                                                                                                                                                                                                                                                                        |
| NCSN                           | 9430068N19RIK, AA272311, APH2, ATAG1874, D1Dau13, D1Dau13e, K1aa0253, mK1AA0253, Nc, NCT, ni, NICASTRIN                                                                                                                                                                                                                                                                                                                                                                                                                                                                                                                                                                                                                                                                                                                                                                                                                                                                                                                                                                                                                                                                                                                                                                                                                                                                                                                                                                                                                                                                                                                                                                                                                                                                                                                                                                                                                                                                                                                                                                                                                                                                                                                                                                                                                                                                                                                                                                                                                                                                                                                                                                                                                                                                                                                                                                                                                                                                                                                                                                                                                                                                                                                                                                                                                                                                                                                                                                                                                                                                                                                                                                                                                                                                                                                                                                                                                                                                                                                                                                                                                                                                                                                                                                                                                                                                                                                                                                                                                                                                                                                                                                                                                                                                                                                                                                                                                                                                                                                                                                                                                                                                                                                                                                                                                                                                                                                                                                                                                                                                                                                                                                                                                                                                                                                                                                                                                                                                                                                                                                                                                                                                                                                                                                                                                                                                                                                                                                                                                                                                                                                                                                                                                                                                                                                                                                                                                                                                                                                                                                                                                                                                                                                                                                                                                                                                                                                                                                                                                                                                                                                                                                                                                                                                                                                                                                                                                                                                                                                                                                                                                                                                                                                                                                                                                                                                                                                                                                                                                                                                                                                                                                                                                                                                                                                                                                                                                                                                                                                                                                                                                                                                                                                                                                                                                                                                                                                                                                                                                                                                                                                                                                                                                                                                                                                                                                                                                                                                                                                                                                                                                                                                                                                                                                                                                                                                                                                                                                                                                                                                                                                                                                                                                                                                                                                                                                                                                                                                                                                                                                                                                                                                                                                                                                                                                                                                                                                                                              |
| NF1                            | AW494271, Dsk, Dsk9, E030030H24RIK, LOC646021, Mhdads, MhdadsK9, Neurofibromatosis 1, NEUROFIBROMIN, neurofibromin 1, Nf-, NF1-GAP, NFNS, VRNF, WSS                                                                                                                                                                                                                                                                                                                                                                                                                                                                                                                                                                                                                                                                                                                                                                                                                                                                                                                                                                                                                                                                                                                                                                                                                                                                                                                                                                                                                                                                                                                                                                                                                                                                                                                                                                                                                                                                                                                                                                                                                                                                                                                                                                                                                                                                                                                                                                                                                                                                                                                                                                                                                                                                                                                                                                                                                                                                                                                                                                                                                                                                                                                                                                                                                                                                                                                                                                                                                                                                                                                                                                                                                                                                                                                                                                                                                                                                                                                                                                                                                                                                                                                                                                                                                                                                                                                                                                                                                                                                                                                                                                                                                                                                                                                                                                                                                                                                                                                                                                                                                                                                                                                                                                                                                                                                                                                                                                                                                                                                                                                                                                                                                                                                                                                                                                                                                                                                                                                                                                                                                                                                                                                                                                                                                                                                                                                                                                                                                                                                                                                                                                                                                                                                                                                                                                                                                                                                                                                                                                                                                                                                                                                                                                                                                                                                                                                                                                                                                                                                                                                                                                                                                                                                                                                                                                                                                                                                                                                                                                                                                                                                                                                                                                                                                                                                                                                                                                                                                                                                                                                                                                                                                                                                                                                                                                                                                                                                                                                                                                                                                                                                                                                                                                                                                                                                                                                                                                                                                                                                                                                                                                                                                                                                                                                                                                                                                                                                                                                                                                                                                                                                                                                                                                                                                                                                                                                                                                                                                                                                                                                                                                                                                                                                                                                                                                                                                                                                                                                                                                                                                                                                                                                                                                                                                                                                                                                  |
| NFκB                           | NF-KAPPA B, NF-κ B, nuclear factor-κ b, transcription factor nuclear factor κ b                                                                                                                                                                                                                                                                                                                                                                                                                                                                                                                                                                                                                                                                                                                                                                                                                                                                                                                                                                                                                                                                                                                                                                                                                                                                                                                                                                                                                                                                                                                                                                                                                                                                                                                                                                                                                                                                                                                                                                                                                                                                                                                                                                                                                                                                                                                                                                                                                                                                                                                                                                                                                                                                                                                                                                                                                                                                                                                                                                                                                                                                                                                                                                                                                                                                                                                                                                                                                                                                                                                                                                                                                                                                                                                                                                                                                                                                                                                                                                                                                                                                                                                                                                                                                                                                                                                                                                                                                                                                                                                                                                                                                                                                                                                                                                                                                                                                                                                                                                                                                                                                                                                                                                                                                                                                                                                                                                                                                                                                                                                                                                                                                                                                                                                                                                                                                                                                                                                                                                                                                                                                                                                                                                                                                                                                                                                                                                                                                                                                                                                                                                                                                                                                                                                                                                                                                                                                                                                                                                                                                                                                                                                                                                                                                                                                                                                                                                                                                                                                                                                                                                                                                                                                                                                                                                                                                                                                                                                                                                                                                                                                                                                                                                                                                                                                                                                                                                                                                                                                                                                                                                                                                                                                                                                                                                                                                                                                                                                                                                                                                                                                                                                                                                                                                                                                                                                                                                                                                                                                                                                                                                                                                                                                                                                                                                                                                                                                                                                                                                                                                                                                                                                                                                                                                                                                                                                                                                                                                                                                                                                                                                                                                                                                                                                                                                                                                                                                                                                                                                                                                                                                                                                                                                                                                                                                                                                                                                                      |
| NLK                            | A1194375, LOC100044468, nemo like kinase, RGD1561602                                                                                                                                                                                                                                                                                                                                                                                                                                                                                                                                                                                                                                                                                                                                                                                                                                                                                                                                                                                                                                                                                                                                                                                                                                                                                                                                                                                                                                                                                                                                                                                                                                                                                                                                                                                                                                                                                                                                                                                                                                                                                                                                                                                                                                                                                                                                                                                                                                                                                                                                                                                                                                                                                                                                                                                                                                                                                                                                                                                                                                                                                                                                                                                                                                                                                                                                                                                                                                                                                                                                                                                                                                                                                                                                                                                                                                                                                                                                                                                                                                                                                                                                                                                                                                                                                                                                                                                                                                                                                                                                                                                                                                                                                                                                                                                                                                                                                                                                                                                                                                                                                                                                                                                                                                                                                                                                                                                                                                                                                                                                                                                                                                                                                                                                                                                                                                                                                                                                                                                                                                                                                                                                                                                                                                                                                                                                                                                                                                                                                                                                                                                                                                                                                                                                                                                                                                                                                                                                                                                                                                                                                                                                                                                                                                                                                                                                                                                                                                                                                                                                                                                                                                                                                                                                                                                                                                                                                                                                                                                                                                                                                                                                                                                                                                                                                                                                                                                                                                                                                                                                                                                                                                                                                                                                                                                                                                                                                                                                                                                                                                                                                                                                                                                                                                                                                                                                                                                                                                                                                                                                                                                                                                                                                                                                                                                                                                                                                                                                                                                                                                                                                                                                                                                                                                                                                                                                                                                                                                                                                                                                                                                                                                                                                                                                                                                                                                                                                                                                                                                                                                                                                                                                                                                                                                                                                                                                                                                                                 |
| NOTCH1C                        | 9930111A19RIK, AOS5, AOV0D1, hN1, lin, lin-12, Mi, Mis6, N, N1, NOTCH, notch receptor 1, Ta, TAN1                                                                                                                                                                                                                                                                                                                                                                                                                                                                                                                                                                                                                                                                                                                                                                                                                                                                                                                                                                                                                                                                                                                                                                                                                                                                                                                                                                                                                                                                                                                                                                                                                                                                                                                                                                                                                                                                                                                                                                                                                                                                                                                                                                                                                                                                                                                                                                                                                                                                                                                                                                                                                                                                                                                                                                                                                                                                                                                                                                                                                                                                                                                                                                                                                                                                                                                                                                                                                                                                                                                                                                                                                                                                                                                                                                                                                                                                                                                                                                                                                                                                                                                                                                                                                                                                                                                                                                                                                                                                                                                                                                                                                                                                                                                                                                                                                                                                                                                                                                                                                                                                                                                                                                                                                                                                                                                                                                                                                                                                                                                                                                                                                                                                                                                                                                                                                                                                                                                                                                                                                                                                                                                                                                                                                                                                                                                                                                                                                                                                                                                                                                                                                                                                                                                                                                                                                                                                                                                                                                                                                                                                                                                                                                                                                                                                                                                                                                                                                                                                                                                                                                                                                                                                                                                                                                                                                                                                                                                                                                                                                                                                                                                                                                                                                                                                                                                                                                                                                                                                                                                                                                                                                                                                                                                                                                                                                                                                                                                                                                                                                                                                                                                                                                                                                                                                                                                                                                                                                                                                                                                                                                                                                                                                                                                                                                                                                                                                                                                                                                                                                                                                                                                                                                                                                                                                                                                                                                                                                                                                                                                                                                                                                                                                                                                                                                                                                                                                                                                                                                                                                                                                                                                                                                                                                                                                                                                                                                    |
| p38MAPK                        | P38, p38 MAP KINASE, P38 MITOGEN-ACTIVATED protein KINASE                                                                                                                                                                                                                                                                                                                                                                                                                                                                                                                                                                                                                                                                                                                                                                                                                                                                                                                                                                                                                                                                                                                                                                                                                                                                                                                                                                                                                                                                                                                                                                                                                                                                                                                                                                                                                                                                                                                                                                                                                                                                                                                                                                                                                                                                                                                                                                                                                                                                                                                                                                                                                                                                                                                                                                                                                                                                                                                                                                                                                                                                                                                                                                                                                                                                                                                                                                                                                                                                                                                                                                                                                                                                                                                                                                                                                                                                                                                                                                                                                                                                                                                                                                                                                                                                                                                                                                                                                                                                                                                                                                                                                                                                                                                                                                                                                                                                                                                                                                                                                                                                                                                                                                                                                                                                                                                                                                                                                                                                                                                                                                                                                                                                                                                                                                                                                                                                                                                                                                                                                                                                                                                                                                                                                                                                                                                                                                                                                                                                                                                                                                                                                                                                                                                                                                                                                                                                                                                                                                                                                                                                                                                                                                                                                                                                                                                                                                                                                                                                                                                                                                                                                                                                                                                                                                                                                                                                                                                                                                                                                                                                                                                                                                                                                                                                                                                                                                                                                                                                                                                                                                                                                                                                                                                                                                                                                                                                                                                                                                                                                                                                                                                                                                                                                                                                                                                                                                                                                                                                                                                                                                                                                                                                                                                                                                                                                                                                                                                                                                                                                                                                                                                                                                                                                                                                                                                                                                                                                                                                                                                                                                                                                                                                                                                                                                                                                                                                                                                                                                                                                                                                                                                                                                                                                                                                                                                                                                                                            |
| Patched                        | PTC, PTCH                                                                                                                                                                                                                                                                                                                                                                                                                                                                                                                                                                                                                                                                                                                                                                                                                                                                                                                                                                                                                                                                                                                                                                                                                                                                                                                                                                                                                                                                                                                                                                                                                                                                                                                                                                                                                                                                                                                                                                                                                                                                                                                                                                                                                                                                                                                                                                                                                                                                                                                                                                                                                                                                                                                                                                                                                                                                                                                                                                                                                                                                                                                                                                                                                                                                                                                                                                                                                                                                                                                                                                                                                                                                                                                                                                                                                                                                                                                                                                                                                                                                                                                                                                                                                                                                                                                                                                                                                                                                                                                                                                                                                                                                                                                                                                                                                                                                                                                                                                                                                                                                                                                                                                                                                                                                                                                                                                                                                                                                                                                                                                                                                                                                                                                                                                                                                                                                                                                                                                                                                                                                                                                                                                                                                                                                                                                                                                                                                                                                                                                                                                                                                                                                                                                                                                                                                                                                                                                                                                                                                                                                                                                                                                                                                                                                                                                                                                                                                                                                                                                                                                                                                                                                                                                                                                                                                                                                                                                                                                                                                                                                                                                                                                                                                                                                                                                                                                                                                                                                                                                                                                                                                                                                                                                                                                                                                                                                                                                                                                                                                                                                                                                                                                                                                                                                                                                                                                                                                                                                                                                                                                                                                                                                                                                                                                                                                                                                                                                                                                                                                                                                                                                                                                                                                                                                                                                                                                                                                                                                                                                                                                                                                                                                                                                                                                                                                                                                                                                                                                                                                                                                                                                                                                                                                                                                                                                                                                                                                                                            |
| PI3K                           | 1-phosphatidylinositol 3-kinase, 2.7.1.137, ATP:1-phosphatidyl-1D-myo-inositol 3-phosphotransferase, Phosphatidylinositol 3 kinase, phosphatidylinositol 3'-kinase, PI3-kinase, PtdIns 3 Kinase, type III phosphoinositide 3-kinase, type I phosphatidylinositol kinase, Vps34p                                                                                                                                                                                                                                                                                                                                                                                                                                                                                                                                                                                                                                                                                                                                                                                                                                                                                                                                                                                                                                                                                                                                                                                                                                                                                                                                                                                                                                                                                                                                                                                                                                                                                                                                                                                                                                                                                                                                                                                                                                                                                                                                                                                                                                                                                                                                                                                                                                                                                                                                                                                                                                                                                                                                                                                                                                                                                                                                                                                                                                                                                                                                                                                                                                                                                                                                                                                                                                                                                                                                                                                                                                                                                                                                                                                                                                                                                                                                                                                                                                                                                                                                                                                                                                                                                                                                                                                                                                                                                                                                                                                                                                                                                                                                                                                                                                                                                                                                                                                                                                                                                                                                                                                                                                                                                                                                                                                                                                                                                                                                                                                                                                                                                                                                                                                                                                                                                                                                                                                                                                                                                                                                                                                                                                                                                                                                                                                                                                                                                                                                                                                                                                                                                                                                                                                                                                                                                                                                                                                                                                                                                                                                                                                                                                                                                                                                                                                                                                                                                                                                                                                                                                                                                                                                                                                                                                                                                                                                                                                                                                                                                                                                                                                                                                                                                                                                                                                                                                                                                                                                                                                                                                                                                                                                                                                                                                                                                                                                                                                                                                                                                                                                                                                                                                                                                                                                                                                                                                                                                                                                                                                                                                                                                                                                                                                                                                                                                                                                                                                                                                                                                                                                                                                                                                                                                                                                                                                                                                                                                                                                                                                                                                                                                                                                                                                                                                                                                                                                                                                                                                                                                                                                                                                      |
| PIP2                           | 1,2-diacyl-sn-glycero-3-phospho-(1'-myo-inositol-4',5-bisphosphate), 1-O-(3-sn-phosphatidyl)-1D-myo-inositol 4,5-bis(dihydrogen phosphate), 1-phosphatidyl-1D-myo-inositol 4,5-bisphosphate, C11H19O19P3R2                                                                                                                                                                                                                                                                                                                                                                                                                                                                                                                                                                                                                                                                                                                                                                                                                                                                                                                                                                                                                                                                                                                                                                                                                                                                                                                                                                                                                                                                                                                                                                                                                                                                                                                                                                                                                                                                                                                                                                                                                                                                                                                                                                                                                                                                                                                                                                                                                                                                                                                                                                                                                                                                                                                                                                                                                                                                                                                                                                                                                                                                                                                                                                                                                                                                                                                                                                                                                                                                                                                                                                                                                                                                                                                                                                                                                                                                                                                                                                                                                                                                                                                                                                                                                                                                                                                                                                                                                                                                                                                                                                                                                                                                                                                                                                                                                                                                                                                                                                                                                                                                                                                                                                                                                                                                                                                                                                                                                                                                                                                                                                                                                                                                                                                                                                                                                                                                                                                                                                                                                                                                                                                                                                                                                                                                                                                                                                                                                                                                                                                                                                                                                                                                                                                                                                                                                                                                                                                                                                                                                                                                                                                                                                                                                                                                                                                                                                                                                                                                                                                                                                                                                                                                                                                                                                                                                                                                                                                                                                                                                                                                                                                                                                                                                                                                                                                                                                                                                                                                                                                                                                                                                                                                                                                                                                                                                                                                                                                                                                                                                                                                                                                                                                                                                                                                                                                                                                                                                                                                                                                                                                                                                                                                                                                                                                                                                                                                                                                                                                                                                                                                                                                                                                                                                                                                                                                                                                                                                                                                                                                                                                                                                                                                                                                                                                                                                                                                                                                                                                                                                                                                                                                                                                                                                                                           |
| PIP3                           | 1-phosphatidyl-1D-myo-inositol 3,4,5-trisphosphate, phosphatidylinositol 3,4,5-trisphosphate, phosphoinositide (3,4,5) P3, PI(3,4,5)P3, PIns(3,4,5)P3, PIP3, PtdIns(3,4,5)P3                                                                                                                                                                                                                                                                                                                                                                                                                                                                                                                                                                                                                                                                                                                                                                                                                                                                                                                                                                                                                                                                                                                                                                                                                                                                                                                                                                                                                                                                                                                                                                                                                                                                                                                                                                                                                                                                                                                                                                                                                                                                                                                                                                                                                                                                                                                                                                                                                                                                                                                                                                                                                                                                                                                                                                                                                                                                                                                                                                                                                                                                                                                                                                                                                                                                                                                                                                                                                                                                                                                                                                                                                                                                                                                                                                                                                                                                                                                                                                                                                                                                                                                                                                                                                                                                                                                                                                                                                                                                                                                                                                                                                                                                                                                                                                                                                                                                                                                                                                                                                                                                                                                                                                                                                                                                                                                                                                                                                                                                                                                                                                                                                                                                                                                                                                                                                                                                                                                                                                                                                                                                                                                                                                                                                                                                                                                                                                                                                                                                                                                                                                                                                                                                                                                                                                                                                                                                                                                                                                                                                                                                                                                                                                                                                                                                                                                                                                                                                                                                                                                                                                                                                                                                                                                                                                                                                                                                                                                                                                                                                                                                                                                                                                                                                                                                                                                                                                                                                                                                                                                                                                                                                                                                                                                                                                                                                                                                                                                                                                                                                                                                                                                                                                                                                                                                                                                                                                                                                                                                                                                                                                                                                                                                                                                                                                                                                                                                                                                                                                                                                                                                                                                                                                                                                                                                                                                                                                                                                                                                                                                                                                                                                                                                                                                                                                                                                                                                                                                                                                                                                                                                                                                                                                                                                                                                                         |
| PKA                            | A-Kinase, cAMP-Dependent Protein Kinase, cyclic AMP depended protein kinase, protein KINASE A                                                                                                                                                                                                                                                                                                                                                                                                                                                                                                                                                                                                                                                                                                                                                                                                                                                                                                                                                                                                                                                                                                                                                                                                                                                                                                                                                                                                                                                                                                                                                                                                                                                                                                                                                                                                                                                                                                                                                                                                                                                                                                                                                                                                                                                                                                                                                                                                                                                                                                                                                                                                                                                                                                                                                                                                                                                                                                                                                                                                                                                                                                                                                                                                                                                                                                                                                                                                                                                                                                                                                                                                                                                                                                                                                                                                                                                                                                                                                                                                                                                                                                                                                                                                                                                                                                                                                                                                                                                                                                                                                                                                                                                                                                                                                                                                                                                                                                                                                                                                                                                                                                                                                                                                                                                                                                                                                                                                                                                                                                                                                                                                                                                                                                                                                                                                                                                                                                                                                                                                                                                                                                                                                                                                                                                                                                                                                                                                                                                                                                                                                                                                                                                                                                                                                                                                                                                                                                                                                                                                                                                                                                                                                                                                                                                                                                                                                                                                                                                                                                                                                                                                                                                                                                                                                                                                                                                                                                                                                                                                                                                                                                                                                                                                                                                                                                                                                                                                                                                                                                                                                                                                                                                                                                                                                                                                                                                                                                                                                                                                                                                                                                                                                                                                                                                                                                                                                                                                                                                                                                                                                                                                                                                                                                                                                                                                                                                                                                                                                                                                                                                                                                                                                                                                                                                                                                                                                                                                                                                                                                                                                                                                                                                                                                                                                                                                                                                                                                                                                                                                                                                                                                                                                                                                                                                                                                                                                                        |
| PKC                            | Cnpkc, PKC, Pkc(s), Protein Kinase C                                                                                                                                                                                                                                                                                                                                                                                                                                                                                                                                                                                                                                                                                                                                                                                                                                                                                                                                                                                                                                                                                                                                                                                                                                                                                                                                                                                                                                                                                                                                                                                                                                                                                                                                                                                                                                                                                                                                                                                                                                                                                                                                                                                                                                                                                                                                                                                                                                                                                                                                                                                                                                                                                                                                                                                                                                                                                                                                                                                                                                                                                                                                                                                                                                                                                                                                                                                                                                                                                                                                                                                                                                                                                                                                                                                                                                                                                                                                                                                                                                                                                                                                                                                                                                                                                                                                                                                                                                                                                                                                                                                                                                                                                                                                                                                                                                                                                                                                                                                                                                                                                                                                                                                                                                                                                                                                                                                                                                                                                                                                                                                                                                                                                                                                                                                                                                                                                                                                                                                                                                                                                                                                                                                                                                                                                                                                                                                                                                                                                                                                                                                                                                                                                                                                                                                                                                                                                                                                                                                                                                                                                                                                                                                                                                                                                                                                                                                                                                                                                                                                                                                                                                                                                                                                                                                                                                                                                                                                                                                                                                                                                                                                                                                                                                                                                                                                                                                                                                                                                                                                                                                                                                                                                                                                                                                                                                                                                                                                                                                                                                                                                                                                                                                                                                                                                                                                                                                                                                                                                                                                                                                                                                                                                                                                                                                                                                                                                                                                                                                                                                                                                                                                                                                                                                                                                                                                                                                                                                                                                                                                                                                                                                                                                                                                                                                                                                                                                                                                                                                                                                                                                                                                                                                                                                                                                                                                                                                                                                 |
| Picbeta                        | Phospholipase c beta, Phospholipase C β, PLCB, PLCβ                                                                                                                                                                                                                                                                                                                                                                                                                                                                                                                                                                                                                                                                                                                                                                                                                                                                                                                                                                                                                                                                                                                                                                                                                                                                                                                                                                                                                                                                                                                                                                                                                                                                                                                                                                                                                                                                                                                                                                                                                                                                                                                                                                                                                                                                                                                                                                                                                                                                                                                                                                                                                                                                                                                                                                                                                                                                                                                                                                                                                                                                                                                                                                                                                                                                                                                                                                                                                                                                                                                                                                                                                                                                                                                                                                                                                                                                                                                                                                                                                                                                                                                                                                                                                                                                                                                                                                                                                                                                                                                                                                                                                                                                                                                                                                                                                                                                                                                                                                                                                                                                                                                                                                                                                                                                                                                                                                                                                                                                                                                                                                                                                                                                                                                                                                                                                                                                                                                                                                                                                                                                                                                                                                                                                                                                                                                                                                                                                                                                                                                                                                                                                                                                                                                                                                                                                                                                                                                                                                                                                                                                                                                                                                                                                                                                                                                                                                                                                                                                                                                                                                                                                                                                                                                                                                                                                                                                                                                                                                                                                                                                                                                                                                                                                                                                                                                                                                                                                                                                                                                                                                                                                                                                                                                                                                                                                                                                                                                                                                                                                                                                                                                                                                                                                                                                                                                                                                                                                                                                                                                                                                                                                                                                                                                                                                                                                                                                                                                                                                                                                                                                                                                                                                                                                                                                                                                                                                                                                                                                                                                                                                                                                                                                                                                                                                                                                                                                                                                                                                                                                                                                                                                                                                                                                                                                                                                                                                                                                  |
| PMAIP1                         | APR, N, NOXA, phorbol-12-myristate-13-acetate-induced protein 1                                                                                                                                                                                                                                                                                                                                                                                                                                                                                                                                                                                                                                                                                                                                                                                                                                                                                                                                                                                                                                                                                                                                                                                                                                                                                                                                                                                                                                                                                                                                                                                                                                                                                                                                                                                                                                                                                                                                                                                                                                                                                                                                                                                                                                                                                                                                                                                                                                                                                                                                                                                                                                                                                                                                                                                                                                                                                                                                                                                                                                                                                                                                                                                                                                                                                                                                                                                                                                                                                                                                                                                                                                                                                                                                                                                                                                                                                                                                                                                                                                                                                                                                                                                                                                                                                                                                                                                                                                                                                                                                                                                                                                                                                                                                                                                                                                                                                                                                                                                                                                                                                                                                                                                                                                                                                                                                                                                                                                                                                                                                                                                                                                                                                                                                                                                                                                                                                                                                                                                                                                                                                                                                                                                                                                                                                                                                                                                                                                                                                                                                                                                                                                                                                                                                                                                                                                                                                                                                                                                                                                                                                                                                                                                                                                                                                                                                                                                                                                                                                                                                                                                                                                                                                                                                                                                                                                                                                                                                                                                                                                                                                                                                                                                                                                                                                                                                                                                                                                                                                                                                                                                                                                                                                                                                                                                                                                                                                                                                                                                                                                                                                                                                                                                                                                                                                                                                                                                                                                                                                                                                                                                                                                                                                                                                                                                                                                                                                                                                                                                                                                                                                                                                                                                                                                                                                                                                                                                                                                                                                                                                                                                                                                                                                                                                                                                                                                                                                                                                                                                                                                                                                                                                                                                                                                                                                                                                                                                                      |
| Presenilin                     | PS, PS1/2, PSEN1/2                                                                                                                                                                                                                                                                                                                                                                                                                                                                                                                                                                                                                                                                                                                                                                                                                                                                                                                                                                                                                                                                                                                                                                                                                                                                                                                                                                                                                                                                                                                                                                                                                                                                                                                                                                                                                                                                                                                                                                                                                                                                                                                                                                                                                                                                                                                                                                                                                                                                                                                                                                                                                                                                                                                                                                                                                                                                                                                                                                                                                                                                                                                                                                                                                                                                                                                                                                                                                                                                                                                                                                                                                                                                                                                                                                                                                                                                                                                                                                                                                                                                                                                                                                                                                                                                                                                                                                                                                                                                                                                                                                                                                                                                                                                                                                                                                                                                                                                                                                                                                                                                                                                                                                                                                                                                                                                                                                                                                                                                                                                                                                                                                                                                                                                                                                                                                                                                                                                                                                                                                                                                                                                                                                                                                                                                                                                                                                                                                                                                                                                                                                                                                                                                                                                                                                                                                                                                                                                                                                                                                                                                                                                                                                                                                                                                                                                                                                                                                                                                                                                                                                                                                                                                                                                                                                                                                                                                                                                                                                                                                                                                                                                                                                                                                                                                                                                                                                                                                                                                                                                                                                                                                                                                                                                                                                                                                                                                                                                                                                                                                                                                                                                                                                                                                                                                                                                                                                                                                                                                                                                                                                                                                                                                                                                                                                                                                                                                                                                                                                                                                                                                                                                                                                                                                                                                                                                                                                                                                                                                                                                                                                                                                                                                                                                                                                                                                                                                                                                                                                                                                                                                                                                                                                                                                                                                                                                                                                                                                                                   |
| PRKDC                          | A1326420, AU019811, DNA-, DNA-DEPENDENT protein KINASE, DNAPDcs, DNAPK, DNA-PKC, DNA-PKcs, DNPK1, DOX, DOXNPH, dxn, dxnph, HYRC, HYRC1, IMD26, p350, p460, Prkdc predicted, protein kinase, DNA activated, catalytic polypeptide, protein kinase, DNA-activated, catalytic subunit, scid, slip, XRCC, XRCC7                                                                                                                                                                                                                                                                                                                                                                                                                                                                                                                                                                                                                                                                                                                                                                                                                                                                                                                                                                                                                                                                                                                                                                                                                                                                                                                                                                                                                                                                                                                                                                                                                                                                                                                                                                                                                                                                                                                                                                                                                                                                                                                                                                                                                                                                                                                                                                                                                                                                                                                                                                                                                                                                                                                                                                                                                                                                                                                                                                                                                                                                                                                                                                                                                                                                                                                                                                                                                                                                                                                                                                                                                                                                                                                                                                                                                                                                                                                                                                                                                                                                                                                                                                                                                                                                                                                                                                                                                                                                                                                                                                                                                                                                                                                                                                                                                                                                                                                                                                                                                                                                                                                                                                                                                                                                                                                                                                                                                                                                                                                                                                                                                                                                                                                                                                                                                                                                                                                                                                                                                                                                                                                                                                                                                                                                                                                                                                                                                                                                                                                                                                                                                                                                                                                                                                                                                                                                                                                                                                                                                                                                                                                                                                                                                                                                                                                                                                                                                                                                                                                                                                                                                                                                                                                                                                                                                                                                                                                                                                                                                                                                                                                                                                                                                                                                                                                                                                                                                                                                                                                                                                                                                                                                                                                                                                                                                                                                                                                                                                                                                                                                                                                                                                                                                                                                                                                                                                                                                                                                                                                                                                                                                                                                                                                                                                                                                                                                                                                                                                                                                                                                                                                                                                                                                                                                                                                                                                                                                                                                                                                                                                                                                                                                                                                                                                                                                                                                                                                                                                                                                                                                                                                                                          |
| PSENIEN                        | 1700023M08RIK, ACNINV2, MDS033, MSTP064, PEN-2, presenilin enhancer gamma secretase subunit, presenilin enhancer, gamma-secretase subunit, presenilin enhancer γ secretase subunit, presenilin enhancer, γ-secretase subunit, RGD1312037                                                                                                                                                                                                                                                                                                                                                                                                                                                                                                                                                                                                                                                                                                                                                                                                                                                                                                                                                                                                                                                                                                                                                                                                                                                                                                                                                                                                                                                                                                                                                                                                                                                                                                                                                                                                                                                                                                                                                                                                                                                                                                                                                                                                                                                                                                                                                                                                                                                                                                                                                                                                                                                                                                                                                                                                                                                                                                                                                                                                                                                                                                                                                                                                                                                                                                                                                                                                                                                                                                                                                                                                                                                                                                                                                                                                                                                                                                                                                                                                                                                                                                                                                                                                                                                                                                                                                                                                                                                                                                                                                                                                                                                                                                                                                                                                                                                                                                                                                                                                                                                                                                                                                                                                                                                                                                                                                                                                                                                                                                                                                                                                                                                                                                                                                                                                                                                                                                                                                                                                                                                                                                                                                                                                                                                                                                                                                                                                                                                                                                                                                                                                                                                                                                                                                                                                                                                                                                                                                                                                                                                                                                                                                                                                                                                                                                                                                                                                                                                                                                                                                                                                                                                                                                                                                                                                                                                                                                                                                                                                                                                                                                                                                                                                                                                                                                                                                                                                                                                                                                                                                                                                                                                                                                                                                                                                                                                                                                                                                                                                                                                                                                                                                                                                                                                                                                                                                                                                                                                                                                                                                                                                                                                                                                                                                                                                                                                                                                                                                                                                                                                                                                                                                                                                                                                                                                                                                                                                                                                                                                                                                                                                                                                                                                                                                                                                                                                                                                                                                                                                                                                                                                                                                                                                                             |
| PTCH1                          | A230106A15RIK, BCNS, mes, NBCCS, patched 1, Pt, PTC, PTC1, PTCH, Ptch2, wi, wig                                                                                                                                                                                                                                                                                                                                                                                                                                                                                                                                                                                                                                                                                                                                                                                                                                                                                                                                                                                                                                                                                                                                                                                                                                                                                                                                                                                                                                                                                                                                                                                                                                                                                                                                                                                                                                                                                                                                                                                                                                                                                                                                                                                                                                                                                                                                                                                                                                                                                                                                                                                                                                                                                                                                                                                                                                                                                                                                                                                                                                                                                                                                                                                                                                                                                                                                                                                                                                                                                                                                                                                                                                                                                                                                                                                                                                                                                                                                                                                                                                                                                                                                                                                                                                                                                                                                                                                                                                                                                                                                                                                                                                                                                                                                                                                                                                                                                                                                                                                                                                                                                                                                                                                                                                                                                                                                                                                                                                                                                                                                                                                                                                                                                                                                                                                                                                                                                                                                                                                                                                                                                                                                                                                                                                                                                                                                                                                                                                                                                                                                                                                                                                                                                                                                                                                                                                                                                                                                                                                                                                                                                                                                                                                                                                                                                                                                                                                                                                                                                                                                                                                                                                                                                                                                                                                                                                                                                                                                                                                                                                                                                                                                                                                                                                                                                                                                                                                                                                                                                                                                                                                                                                                                                                                                                                                                                                                                                                                                                                                                                                                                                                                                                                                                                                                                                                                                                                                                                                                                                                                                                                                                                                                                                                                                                                                                                                                                                                                                                                                                                                                                                                                                                                                                                                                                                                                                                                                                                                                                                                                                                                                                                                                                                                                                                                                                                                                                                                                                                                                                                                                                                                                                                                                                                                                                                                                                                                                      |
| PTK2                           | FA, Fad, FADK, FADK 1, FAK, FAK1, FAK related non-kinase, FR, p125FAK, pp125FAK, PPP1R71, protein tyrosine kinase 2, PTK2 protein tyrosine kinase 2, TYROSINE KINASE 2                                                                                                                                                                                                                                                                                                                                                                                                                                                                                                                                                                                                                                                                                                                                                                                                                                                                                                                                                                                                                                                                                                                                                                                                                                                                                                                                                                                                                                                                                                                                                                                                                                                                                                                                                                                                                                                                                                                                                                                                                                                                                                                                                                                                                                                                                                                                                                                                                                                                                                                                                                                                                                                                                                                                                                                                                                                                                                                                                                                                                                                                                                                                                                                                                                                                                                                                                                                                                                                                                                                                                                                                                                                                                                                                                                                                                                                                                                                                                                                                                                                                                                                                                                                                                                                                                                                                                                                                                                                                                                                                                                                                                                                                                                                                                                                                                                                                                                                                                                                                                                                                                                                                                                                                                                                                                                                                                                                                                                                                                                                                                                                                                                                                                                                                                                                                                                                                                                                                                                                                                                                                                                                                                                                                                                                                                                                                                                                                                                                                                                                                                                                                                                                                                                                                                                                                                                                                                                                                                                                                                                                                                                                                                                                                                                                                                                                                                                                                                                                                                                                                                                                                                                                                                                                                                                                                                                                                                                                                                                                                                                                                                                                                                                                                                                                                                                                                                                                                                                                                                                                                                                                                                                                                                                                                                                                                                                                                                                                                                                                                                                                                                                                                                                                                                                                                                                                                                                                                                                                                                                                                                                                                                                                                                                                                                                                                                                                                                                                                                                                                                                                                                                                                                                                                                                                                                                                                                                                                                                                                                                                                                                                                                                                                                                                                                                                                                                                                                                                                                                                                                                                                                                                                                                                                                                                                                               |
| PTPN11                         | 2700084A17RIK, AW536184, BPTP3, CFC, JMML, METCDS, MGC14433, Noonan syndrome 1, NS1, protein tyrosine phosphatase non-receptor type 11, protein tyrosine phosphatase, non-receptor type 11, PTP, PTP-1D, PTP2C, S, SAP-2, Sh, SH-P, SHP-2, SH-PTP2, SH-PTP3, Src homology protein 2, SYP                                                                                                                                                                                                                                                                                                                                                                                                                                                                                                                                                                                                                                                                                                                                                                                                                                                                                                                                                                                                                                                                                                                                                                                                                                                                                                                                                                                                                                                                                                                                                                                                                                                                                                                                                                                                                                                                                                                                                                                                                                                                                                                                                                                                                                                                                                                                                                                                                                                                                                                                                                                                                                                                                                                                                                                                                                                                                                                                                                                                                                                                                                                                                                                                                                                                                                                                                                                                                                                                                                                                                                                                                                                                                                                                                                                                                                                                                                                                                                                                                                                                                                                                                                                                                                                                                                                                                                                                                                                                                                                                                                                                                                                                                                                                                                                                                                                                                                                                                                                                                                                                                                                                                                                                                                                                                                                                                                                                                                                                                                                                                                                                                                                                                                                                                                                                                                                                                                                                                                                                                                                                                                                                                                                                                                                                                                                                                                                                                                                                                                                                                                                                                                                                                                                                                                                                                                                                                                                                                                                                                                                                                                                                                                                                                                                                                                                                                                                                                                                                                                                                                                                                                                                                                                                                                                                                                                                                                                                                                                                                                                                                                                                                                                                                                                                                                                                                                                                                                                                                                                                                                                                                                                                                                                                                                                                                                                                                                                                                                                                                                                                                                                                                                                                                                                                                                                                                                                                                                                                                                                                                                                                                                                                                                                                                                                                                                                                                                                                                                                                                                                                                                                                                                                                                                                                                                                                                                                                                                                                                                                                                                                                                                                                                                                                                                                                                                                                                                                                                                                                                                                                                                                                                                                             |
| RAF1                           | 6430402F14RIK, AA990557, BB129353, CMD1NN, c-R, Cra, CRAF, Craf1, D830050J10RIK, leukaemia ONCOGENE HOMOLOG1, LEUKEMIA ONCOGENE HOMOLOG1, NS5, Raf-1 proto-oncogene, serine/threonine kinase, v-, v-Raf, v-raf-leukaemia viral oncogene 1, v-rafLeukemia viral oncogene 1                                                                                                                                                                                                                                                                                                                                                                                                                                                                                                                                                                                                                                                                                                                                                                                                                                                                                                                                                                                                                                                                                                                                                                                                                                                                                                                                                                                                                                                                                                                                                                                                                                                                                                                                                                                                                                                                                                                                                                                                                                                                                                                                                                                                                                                                                                                                                                                                                                                                                                                                                                                                                                                                                                                                                                                                                                                                                                                                                                                                                                                                                                                                                                                                                                                                                                                                                                                                                                                                                                                                                                                                                                                                                                                                                                                                                                                                                                                                                                                                                                                                                                                                                                                                                                                                                                                                                                                                                                                                                                                                                                                                                                                                                                                                                                                                                                                                                                                                                                                                                                                                                                                                                                                                                                                                                                                                                                                                                                                                                                                                                                                                                                                                                                                                                                                                                                                                                                                                                                                                                                                                                                                                                                                                                                                                                                                                                                                                                                                                                                                                                                                                                                                                                                                                                                                                                                                                                                                                                                                                                                                                                                                                                                                                                                                                                                                                                                                                                                                                                                                                                                                                                                                                                                                                                                                                                                                                                                                                                                                                                                                                                                                                                                                                                                                                                                                                                                                                                                                                                                                                                                                                                                                                                                                                                                                                                                                                                                                                                                                                                                                                                                                                                                                                                                                                                                                                                                                                                                                                                                                                                                                                                                                                                                                                                                                                                                                                                                                                                                                                                                                                                                                                                                                                                                                                                                                                                                                                                                                                                                                                                                                                                                                                                                                                                                                                                                                                                                                                                                                                                                                                                                                                                                                            |
| Ral                            | Ral A/B                                                                                                                                                                                                                                                                                                                                                                                                                                                                                                                                                                                                                                                                                                                                                                                                                                                                                                                                                                                                                                                                                                                                                                                                                                                                                                                                                                                                                                                                                                                                                                                                                                                                                                                                                                                                                                                                                                                                                                                                                                                                                                                                                                                                                                                                                                                                                                                                                                                                                                                                                                                                                                                                                                                                                                                                                                                                                                                                                                                                                                                                                                                                                                                                                                                                                                                                                                                                                                                                                                                                                                                                                                                                                                                                                                                                                                                                                                                                                                                                                                                                                                                                                                                                                                                                                                                                                                                                                                                                                                                                                                                                                                                                                                                                                                                                                                                                                                                                                                                                                                                                                                                                                                                                                                                                                                                                                                                                                                                                                                                                                                                                                                                                                                                                                                                                                                                                                                                                                                                                                                                                                                                                                                                                                                                                                                                                                                                                                                                                                                                                                                                                                                                                                                                                                                                                                                                                                                                                                                                                                                                                                                                                                                                                                                                                                                                                                                                                                                                                                                                                                                                                                                                                                                                                                                                                                                                                                                                                                                                                                                                                                                                                                                                                                                                                                                                                                                                                                                                                                                                                                                                                                                                                                                                                                                                                                                                                                                                                                                                                                                                                                                                                                                                                                                                                                                                                                                                                                                                                                                                                                                                                                                                                                                                                                                                                                                                                                                                                                                                                                                                                                                                                                                                                                                                                                                                                                                                                                                                                                                                                                                                                                                                                                                                                                                                                                                                                                                                                                                                                                                                                                                                                                                                                                                                                                                                                                                                                                                                              |
| RALBP1                         | DNP-SG ATPase, R, ralA binding protein 1, Ral GAP, Rik, RIP1, RL, RLIP1, RLIP76                                                                                                                                                                                                                                                                                                                                                                                                                                                                                                                                                                                                                                                                                                                                                                                                                                                                                                                                                                                                                                                                                                                                                                                                                                                                                                                                                                                                                                                                                                                                                                                                                                                                                                                                                                                                                                                                                                                                                                                                                                                                                                                                                                                                                                                                                                                                                                                                                                                                                                                                                                                                                                                                                                                                                                                                                                                                                                                                                                                                                                                                                                                                                                                                                                                                                                                                                                                                                                                                                                                                                                                                                                                                                                                                                                                                                                                                                                                                                                                                                                                                                                                                                                                                                                                                                                                                                                                                                                                                                                                                                                                                                                                                                                                                                                                                                                                                                                                                                                                                                                                                                                                                                                                                                                                                                                                                                                                                                                                                                                                                                                                                                                                                                                                                                                                                                                                                                                                                                                                                                                                                                                                                                                                                                                                                                                                                                                                                                                                                                                                                                                                                                                                                                                                                                                                                                                                                                                                                                                                                                                                                                                                                                                                                                                                                                                                                                                                                                                                                                                                                                                                                                                                                                                                                                                                                                                                                                                                                                                                                                                                                                                                                                                                                                                                                                                                                                                                                                                                                                                                                                                                                                                                                                                                                                                                                                                                                                                                                                                                                                                                                                                                                                                                                                                                                                                                                                                                                                                                                                                                                                                                                                                                                                                                                                                                                                                                                                                                                                                                                                                                                                                                                                                                                                                                                                                                                                                                                                                                                                                                                                                                                                                                                                                                                                                                                                                                                                                                                                                                                                                                                                                                                                                                                                                                                                                                                                                                      |
| RALGDS                         | Gn, Gnds, Hs.560937, mK1AA1308, Ra, RalGDSB, RalGEF, ral guanine nucleotide dissociation stimulator, Rg, RGDS, RGF                                                                                                                                                                                                                                                                                                                                                                                                                                                                                                                                                                                                                                                                                                                                                                                                                                                                                                                                                                                                                                                                                                                                                                                                                                                                                                                                                                                                                                                                                                                                                                                                                                                                                                                                                                                                                                                                                                                                                                                                                                                                                                                                                                                                                                                                                                                                                                                                                                                                                                                                                                                                                                                                                                                                                                                                                                                                                                                                                                                                                                                                                                                                                                                                                                                                                                                                                                                                                                                                                                                                                                                                                                                                                                                                                                                                                                                                                                                                                                                                                                                                                                                                                                                                                                                                                                                                                                                                                                                                                                                                                                                                                                                                                                                                                                                                                                                                                                                                                                                                                                                                                                                                                                                                                                                                                                                                                                                                                                                                                                                                                                                                                                                                                                                                                                                                                                                                                                                                                                                                                                                                                                                                                                                                                                                                                                                                                                                                                                                                                                                                                                                                                                                                                                                                                                                                                                                                                                                                                                                                                                                                                                                                                                                                                                                                                                                                                                                                                                                                                                                                                                                                                                                                                                                                                                                                                                                                                                                                                                                                                                                                                                                                                                                                                                                                                                                                                                                                                                                                                                                                                                                                                                                                                                                                                                                                                                                                                                                                                                                                                                                                                                                                                                                                                                                                                                                                                                                                                                                                                                                                                                                                                                                                                                                                                                                                                                                                                                                                                                                                                                                                                                                                                                                                                                                                                                                                                                                                                                                                                                                                                                                                                                                                                                                                                                                                                                                                                                                                                                                                                                                                                                                                                                                                                                                                                                                                                   |
| RAPGEF1                        | 4932418O06RIK, C3G, C3G-1, C3G-2, Grf, GRF2, Rap guanine nucleotide exchange factor 1, Rap guanine nucleotide exchange factor (GEF) 1                                                                                                                                                                                                                                                                                                                                                                                                                                                                                                                                                                                                                                                                                                                                                                                                                                                                                                                                                                                                                                                                                                                                                                                                                                                                                                                                                                                                                                                                                                                                                                                                                                                                                                                                                                                                                                                                                                                                                                                                                                                                                                                                                                                                                                                                                                                                                                                                                                                                                                                                                                                                                                                                                                                                                                                                                                                                                                                                                                                                                                                                                                                                                                                                                                                                                                                                                                                                                                                                                                                                                                                                                                                                                                                                                                                                                                                                                                                                                                                                                                                                                                                                                                                                                                                                                                                                                                                                                                                                                                                                                                                                                                                                                                                                                                                                                                                                                                                                                                                                                                                                                                                                                                                                                                                                                                                                                                                                                                                                                                                                                                                                                                                                                                                                                                                                                                                                                                                                                                                                                                                                                                                                                                                                                                                                                                                                                                                                                                                                                                                                                                                                                                                                                                                                                                                                                                                                                                                                                                                                                                                                                                                                                                                                                                                                                                                                                                                                                                                                                                                                                                                                                                                                                                                                                                                                                                                                                                                                                                                                                                                                                                                                                                                                                                                                                                                                                                                                                                                                                                                                                                                                                                                                                                                                                                                                                                                                                                                                                                                                                                                                                                                                                                                                                                                                                                                                                                                                                                                                                                                                                                                                                                                                                                                                                                                                                                                                                                                                                                                                                                                                                                                                                                                                                                                                                                                                                                                                                                                                                                                                                                                                                                                                                                                                                                                                                                                                                                                                                                                                                                                                                                                                                                                                                                                                                                                                |
| RAPGEF3                        | 2310016P22RIK, 9330170P05RIK, bcm910, CAMP-GEF1, CGEF1, Epa, EPAC, EPAC1, HSU79275, Rap guanine nucleotide exchange factor 3, Rap guanine nucleotide exchange factor (GEF) 3                                                                                                                                                                                                                                                                                                                                                                                                                                                                                                                                                                                                                                                                                                                                                                                                                                                                                                                                                                                                                                                                                                                                                                                                                                                                                                                                                                                                                                                                                                                                                                                                                                                                                                                                                                                                                                                                                                                                                                                                                                                                                                                                                                                                                                                                                                                                                                                                                                                                                                                                                                                                                                                                                                                                                                                                                                                                                                                                                                                                                                                                                                                                                                                                                                                                                                                                                                                                                                                                                                                                                                                                                                                                                                                                                                                                                                                                                                                                                                                                                                                                                                                                                                                                                                                                                                                                                                                                                                                                                                                                                                                                                                                                                                                                                                                                                                                                                                                                                                                                                                                                                                                                                                                                                                                                                                                                                                                                                                                                                                                                                                                                                                                                                                                                                                                                                                                                                                                                                                                                                                                                                                                                                                                                                                                                                                                                                                                                                                                                                                                                                                                                                                                                                                                                                                                                                                                                                                                                                                                                                                                                                                                                                                                                                                                                                                                                                                                                                                                                                                                                                                                                                                                                                                                                                                                                                                                                                                                                                                                                                                                                                                                                                                                                                                                                                                                                                                                                                                                                                                                                                                                                                                                                                                                                                                                                                                                                                                                                                                                                                                                                                                                                                                                                                                                                                                                                                                                                                                                                                                                                                                                                                                                                                                                                                                                                                                                                                                                                                                                                                                                                                                                                                                                                                                                                                                                                                                                                                                                                                                                                                                                                                                                                                                                                                                                                                                                                                                                                                                                                                                                                                                                                                                                                                                                                                         |
| Ras-grf                        | Guanine Nucleotide Releasing                                                                                                                                                                                                                                                                                                                                                                                                                                                                                                                                                                                                                                                                                                                                                                                                                                                                                                                                                                                                                                                                                                                                                                                                                                                                                                                                                                                                                                                                                                                                                                                                                                                                                                                                                                                                                                                                                                                                                                                                                                                                                                                                                                                                                                                                                                                                                                                                                                                                                                                                                                                                                                                                                                                                                                                                                                                                                                                                                                                                                                                                                                                                                                                                                                                                                                                                                                                                                                                                                                                                                                                                                                                                                                                                                                                                                                                                                                                                                                                                                                                                                                                                                                                                                                                                                                                                                                                                                                                                                                                                                                                                                                                                                                                                                                                                                                                                                                                                                                                                                                                                                                                                                                                                                                                                                                                                                                                                                                                                                                                                                                                                                                                                                                                                                                                                                                                                                                                                                                                                                                                                                                                                                                                                                                                                                                                                                                                                                                                                                                                                                                                                                                                                                                                                                                                                                                                                                                                                                                                                                                                                                                                                                                                                                                                                                                                                                                                                                                                                                                                                                                                                                                                                                                                                                                                                                                                                                                                                                                                                                                                                                                                                                                                                                                                                                                                                                                                                                                                                                                                                                                                                                                                                                                                                                                                                                                                                                                                                                                                                                                                                                                                                                                                                                                                                                                                                                                                                                                                                                                                                                                                                                                                                                                                                                                                                                                                                                                                                                                                                                                                                                                                                                                                                                                                                                                                                                                                                                                                                                                                                                                                                                                                                                                                                                                                                                                                                                                                                                                                                                                                                                                                                                                                                                                                                                                                                                                                                                                         |
| RASA1                          | CM-AVM, CMAVM1, G, GAP, GAPX, p120-, p120GAP, P120RASGAP, PKWS, RASA, RASGAP, RAS p21 protein activator 1                                                                                                                                                                                                                                                                                                                                                                                                                                                                                                                                                                                                                                                                                                                                                                                                                                                                                                                                                                                                                                                                                                                                                                                                                                                                                                                                                                                                                                                                                                                                                                                                                                                                                                                                                                                                                                                                                                                                                                                                                                                                                                                                                                                                                                                                                                                                                                                                                                                                                                                                                                                                                                                                                                                                                                                                                                                                                                                                                                                                                                                                                                                                                                                                                                                                                                                                                                                                                                                                                                                                                                                                                                                                                                                                                                                                                                                                                                                                                                                                                                                                                                                                                                                                                                                                                                                                                                                                                                                                                                                                                                                                                                                                                                                                                                                                                                                                                                                                                                                                                                                                                                                                                                                                                                                                                                                                                                                                                                                                                                                                                                                                                                                                                                                                                                                                                                                                                                                                                                                                                                                                                                                                                                                                                                                                                                                                                                                                                                                                                                                                                                                                                                                                                                                                                                                                                                                                                                                                                                                                                                                                                                                                                                                                                                                                                                                                                                                                                                                                                                                                                                                                                                                                                                                                                                                                                                                                                                                                                                                                                                                                                                                                                                                                                                                                                                                                                                                                                                                                                                                                                                                                                                                                                                                                                                                                                                                                                                                                                                                                                                                                                                                                                                                                                                                                                                                                                                                                                                                                                                                                                                                                                                                                                                                                                                                                                                                                                                                                                                                                                                                                                                                                                                                                                                                                                                                                                                                                                                                                                                                                                                                                                                                                                                                                                                                                                                                                                                                                                                                                                                                                                                                                                                                                                                                                                                                                                            |
| RASGRP1                        | CALDAG-GEF1, CALDAG-GEFII, IMD64, RASGRP, RAS guanyl releasing protein 1                                                                                                                                                                                                                                                                                                                                                                                                                                                                                                                                                                                                                                                                                                                                                                                                                                                                                                                                                                                                                                                                                                                                                                                                                                                                                                                                                                                                                                                                                                                                                                                                                                                                                                                                                                                                                                                                                                                                                                                                                                                                                                                                                                                                                                                                                                                                                                                                                                                                                                                                                                                                                                                                                                                                                                                                                                                                                                                                                                                                                                                                                                                                                                                                                                                                                                                                                                                                                                                                                                                                                                                                                                                                                                                                                                                                                                                                                                                                                                                                                                                                                                                                                                                                                                                                                                                                                                                                                                                                                                                                                                                                                                                                                                                                                                                                                                                                                                                                                                                                                                                                                                                                                                                                                                                                                                                                                                                                                                                                                                                                                                                                                                                                                                                                                                                                                                                                                                                                                                                                                                                                                                                                                                                                                                                                                                                                                                                                                                                                                                                                                                                                                                                                                                                                                                                                                                                                                                                                                                                                                                                                                                                                                                                                                                                                                                                                                                                                                                                                                                                                                                                                                                                                                                                                                                                                                                                                                                                                                                                                                                                                                                                                                                                                                                                                                                                                                                                                                                                                                                                                                                                                                                                                                                                                                                                                                                                                                                                                                                                                                                                                                                                                                                                                                                                                                                                                                                                                                                                                                                                                                                                                                                                                                                                                                                                                                                                                                                                                                                                                                                                                                                                                                                                                                                                                                                                                                                                                                                                                                                                                                                                                                                                                                                                                                                                                                                                                                                                                                                                                                                                                                                                                                                                                                                                                                                                                                                                             |
| Rb-                            | Rb1-E2f1, Rb-E2F, Rb-E2F1                                                                                                                                                                                                                                                                                                                                                                                                                                                                                                                                                                                                                                                                                                                                                                                                                                                                                                                                                                                                                                                                                                                                                                                                                                                                                                                                                                                                                                                                                                                                                                                                                                                                                                                                                                                                                                                                                                                                                                                                                                                                                                                                                                                                                                                                                                                                                                                                                                                                                                                                                                                                                                                                                                                                                                                                                                                                                                                                                                                                                                                                                                                                                                                                                                                                                                                                                                                                                                                                                                                                                                                                                                                                                                                                                                                                                                                                                                                                                                                                                                                                                                                                                                                                                                                                                                                                                                                                                                                                                                                                                                                                                                                                                                                                                                                                                                                                                                                                                                                                                                                                                                                                                                                                                                                                                                                                                                                                                                                                                                                                                                                                                                                                                                                                                                                                                                                                                                                                                                                                                                                                                                                                                                                                                                                                                                                                                                                                                                                                                                                                                                                                                                                                                                                                                                                                                                                                                                                                                                                                                                                                                                                                                                                                                                                                                                                                                                                                                                                                                                                                                                                                                                                                                                                                                                                                                                                                                                                                                                                                                                                                                                                                                                                                                                                                                                                                                                                                                                                                                                                                                                                                                                                                                                                                                                                                                                                                                                                                                                                                                                                                                                                                                                                                                                                                                                                                                                                                                                                                                                                                                                                                                                                                                                                                                                                                                                                                                                                                                                                                                                                                                                                                                                                                                                                                                                                                                                                                                                                                                                                                                                                                                                                                                                                                                                                                                                                                                                                                                                                                                                                                                                                                                                                                                                                                                                                                                                                                                                            |
| E2Ftranscripti<br>onrepression |                                                                                                                                                                                                                                                                                                                                                                                                                                                                                                                                                                                                                                                                                                                                                                                                                                                                                                                                                                                                                                                                                                                                                                                                                                                                                                                                                                                                                                                                                                                                                                                                                                                                                                                                                                                                                                                                                                                                                                                                                                                                                                                                                                                                                                                                                                                                                                                                                                                                                                                                                                                                                                                                                                                                                                                                                                                                                                                                                                                                                                                                                                                                                                                                                                                                                                                                                                                                                                                                                                                                                                                                                                                                                                                                                                                                                                                                                                                                                                                                                                                                                                                                                                                                                                                                                                                                                                                                                                                                                                                                                                                                                                                                                                                                                                                                                                                                                                                                                                                                                                                                                                                                                                                                                                                                                                                                                                                                                                                                                                                                                                                                                                                                                                                                                                                                                                                                                                                                                                                                                                                                                                                                                                                                                                                                                                                                                                                                                                                                                                                                                                                                                                                                                                                                                                                                                                                                                                                                                                                                                                                                                                                                                                                                                                                                                                                                                                                                                                                                                                                                                                                                                                                                                                                                                                                                                                                                                                                                                                                                                                                                                                                                                                                                                                                                                                                                                                                                                                                                                                                                                                                                                                                                                                                                                                                                                                                                                                                                                                                                                                                                                                                                                                                                                                                                                                                                                                                                                                                                                                                                                                                                                                                                                                                                                                                                                                                                                                                                                                                                                                                                                                                                                                                                                                                                                                                                                                                                                                                                                                                                                                                                                                                                                                                                                                                                                                                                                                                                                                                                                                                                                                                                                                                                                                                                                                                                                                                                                                                                      |
| RB1                            | OSRC, p, p105, p105-Rb, p110 RB, p110-RB1, pp105, pp110, PPP1R130, pRb, R, RB, RB-ASSOCIATED, RB transcriptional corepressor 1, Retinoblastoma tumor-suppression protein rb                                                                                                                                                                                                                                                                                                                                                                                                                                                                                                                                                                                                                                                                                                                                                                                                                                                                                                                                                                                                                                                                                                                                                                                                                                                                                                                                                                                                                                                                                                                                                                                                                                                                                                                                                                                                                                                                                                                                                                                                                                                                                                                                                                                                                                                                                                                                                                                                                                                                                                                                                                                                                                                                                                                                                                                                                                                                                                                                                                                                                                                                                                                                                                                                                                                                                                                                                                                                                                                                                                                                                                                                                                                                                                                                                                                                                                                                                                                                                                                                                                                                                                                                                                                                                                                                                                                                                                                                                                                                                                                                                                                                                                                                                                                                                                                                                                                                                                                                                                                                                                                                                                                                                                                                                                                                                                                                                                                                                                                                                                                                                                                                                                                                                                                                                                                                                                                                                                                                                                                                                                                                                                                                                                                                                                                                                                                                                                                                                                                                                                                                                                                                                                                                                                                                                                                                                                                                                                                                                                                                                                                                                                                                                                                                                                                                                                                                                                                                                                                                                                                                                                                                                                                                                                                                                                                                                                                                                                                                                                                                                                                                                                                                                                                                                                                                                                                                                                                                                                                                                                                                                                                                                                                                                                                                                                                                                                                                                                                                                                                                                                                                                                                                                                                                                                                                                                                                                                                                                                                                                                                                                                                                                                                                                                                                                                                                                                                                                                                                                                                                                                                                                                                                                                                                                                                                                                                                                                                                                                                                                                                                                                                                                                                                                                                                                                                                                                                                                                                                                                                                                                                                                                                                                                                                                                                                                          |
| RBL1                           | AW547426, CP107, LOC683869, p10, p107, PRB1, RB transcriptional corepressor like 1                                                                                                                                                                                                                                                                                                                                                                                                                                                                                                                                                                                                                                                                                                                                                                                                                                                                                                                                                                                                                                                                                                                                                                                                                                                                                                                                                                                                                                                                                                                                                                                                                                                                                                                                                                                                                                                                                                                                                                                                                                                                                                                                                                                                                                                                                                                                                                                                                                                                                                                                                                                                                                                                                                                                                                                                                                                                                                                                                                                                                                                                                                                                                                                                                                                                                                                                                                                                                                                                                                                                                                                                                                                                                                                                                                                                                                                                                                                                                                                                                                                                                                                                                                                                                                                                                                                                                                                                                                                                                                                                                                                                                                                                                                                                                                                                                                                                                                                                                                                                                                                                                                                                                                                                                                                                                                                                                                                                                                                                                                                                                                                                                                                                                                                                                                                                                                                                                                                                                                                                                                                                                                                                                                                                                                                                                                                                                                                                                                                                                                                                                                                                                                                                                                                                                                                                                                                                                                                                                                                                                                                                                                                                                                                                                                                                                                                                                                                                                                                                                                                                                                                                                                                                                                                                                                                                                                                                                                                                                                                                                                                                                                                                                                                                                                                                                                                                                                                                                                                                                                                                                                                                                                                                                                                                                                                                                                                                                                                                                                                                                                                                                                                                                                                                                                                                                                                                                                                                                                                                                                                                                                                                                                                                                                                                                                                                                                                                                                                                                                                                                                                                                                                                                                                                                                                                                                                                                                                                                                                                                                                                                                                                                                                                                                                                                                                                                                                                                                                                                                                                                                                                                                                                                                                                                                                                                                                                                                                   |
| RBPJ                           | A1843960, AOS3, CBF-1, csl, Iggk, Iggk1, Iggk2, Iggk3, Iggk4, Iggk5, Iggk6, Iggk7, Iggk8, Iggk9, Iggk10, Iggk11, Iggk12, Iggk13, Iggk14, Iggk15, Iggk16, Iggk17, Iggk18, Iggk19, Iggk20, Iggk21, Iggk22, Iggk23, Iggk24, Iggk25, Iggk26, Iggk27, Iggk28, Iggk29, Iggk30, Iggk31, Iggk32, Iggk33, Iggk34, Iggk35, Iggk36, Iggk37, Iggk38, Iggk39, Iggk40, Iggk41, Iggk42, Iggk43, Iggk44, Iggk45, Iggk46, Iggk47, Iggk48, Iggk49, Iggk50, Iggk51, Iggk52, Iggk53, Iggk54, Iggk55, Iggk56, Iggk57, Iggk58, Iggk59, Iggk60, Iggk61, Iggk62, Iggk63, Iggk64, Iggk65, Iggk66, Iggk67, Iggk68, Iggk69, Iggk70, Iggk71, Iggk72, Iggk73, Iggk74, Iggk75, Iggk76, Iggk77, Iggk78, Iggk79, Iggk80, Iggk81, Iggk82, Iggk83, Iggk84, Iggk85, Iggk86, Iggk87, Iggk88, Iggk89, Iggk90, Iggk91, Iggk92, Iggk93, Iggk94, Iggk95, Iggk96, Iggk97, Iggk98, Iggk99, Iggk100, Iggk101, Iggk102, Iggk103, Iggk104, Iggk105, Iggk106, Iggk107, Iggk108, Iggk109, Iggk110, Iggk111, Iggk112, Iggk113, Iggk114, Iggk115, Iggk116, Iggk117, Iggk118, Iggk119, Iggk120, Iggk121, Iggk122, Iggk123, Iggk124, Iggk125, Iggk126, Iggk127, Iggk128, Iggk129, Iggk130, Iggk131, Iggk132, Iggk133, Iggk134, Iggk135, Iggk136, Iggk137, Iggk138, Iggk139, Iggk140, Iggk141, Iggk142, Iggk143, Iggk144, Iggk145, Iggk146, Iggk147, Iggk148, Iggk149, Iggk150, Iggk151, Iggk152, Iggk153, Iggk154, Iggk155, Iggk156, Iggk157, Iggk158, Iggk159, Iggk160, Iggk161, Iggk162, Iggk163, Iggk164, Iggk165, Iggk166, Iggk167, Iggk168, Iggk169, Iggk170, Iggk171, Iggk172, Iggk173, Iggk174, Iggk175, Iggk176, Iggk177, Iggk178, Iggk179, Iggk180, Iggk181, Iggk182, Iggk183, Iggk184, Iggk185, Iggk186, Iggk187, Iggk188, Iggk189, Iggk190, Iggk191, Iggk192, Iggk193, Iggk194, Iggk195, Iggk196, Iggk197, Iggk198, Iggk199, Iggk200, Iggk201, Iggk202, Iggk203, Iggk204, Iggk205, Iggk206, Iggk207, Iggk208, Iggk209, Iggk210, Iggk211, Iggk212, Iggk213, Iggk214, Iggk215, Iggk216, Iggk217, Iggk218, Iggk219, Iggk220, Iggk221, Iggk222, Iggk223, Iggk224, Iggk225, Iggk226, Iggk227, Iggk228, Iggk229, Iggk230, Iggk231, Iggk232, Iggk233, Iggk234, Iggk235, Iggk236, Iggk237, Iggk238, Iggk239, Iggk240, Iggk241, Iggk242, Iggk243, Iggk244, Iggk245, Iggk246, Iggk247, Iggk248, Iggk249, Iggk250, Iggk251, Iggk252, Iggk253, Iggk254, Iggk255, Iggk256, Iggk257, Iggk258, Iggk259, Iggk260, Iggk261, Iggk262, Iggk263, Iggk264, Iggk265, Iggk266, Iggk267, Iggk268, Iggk269, Iggk270, Iggk271, Iggk272, Iggk273, Iggk274, Iggk275, Iggk276, Iggk277, Iggk278, Iggk279, Iggk280, Iggk281, Iggk282, Iggk283, Iggk284, Iggk285, Iggk286, Iggk287, Iggk288, Iggk289, Iggk290, Iggk291, Iggk292, Iggk293, Iggk294, Iggk295, Iggk296, Iggk297, Iggk298, Iggk299, Iggk300, Iggk301, Iggk302, Iggk303, Iggk304, Iggk305, Iggk306, Iggk307, Iggk308, Iggk309, Iggk310, Iggk311, Iggk312, Iggk313, Iggk314, Iggk315, Iggk316, Iggk317, Iggk318, Iggk319, Iggk320, Iggk321, Iggk322, Iggk323, Iggk324, Iggk325, Iggk326, Iggk327, Iggk328, Iggk329, Iggk330, Iggk331, Iggk332, Iggk333, Iggk334, Iggk335, Iggk336, Iggk337, Iggk338, Iggk339, Iggk340, Iggk341, Iggk342, Iggk343, Iggk344, Iggk345, Iggk346, Iggk347, Iggk348, Iggk349, Iggk350, Iggk351, Iggk352, Iggk353, Iggk354, Iggk355, Iggk356, Iggk357, Iggk358, Iggk359, Iggk360, Iggk361, Iggk362, Iggk363, Iggk364, Iggk365, Iggk366, Iggk367, Iggk368, Iggk369, Iggk370, Iggk371, Iggk372, Iggk373, Iggk374, Iggk375, Iggk376, Iggk377, Iggk378, Iggk379, Iggk380, Iggk381, Iggk382, Iggk383, Iggk384, Iggk385, Iggk386, Iggk387, Iggk388, Iggk389, Iggk390, Iggk391, Iggk392, Iggk393, Iggk394, Iggk395, Iggk396, Iggk397, Iggk398, Iggk399, Iggk400, Iggk401, Iggk402, Iggk403, Iggk404, Iggk405, Iggk406, Iggk407, Iggk408, Iggk409, Iggk410, Iggk411, Iggk412, Iggk413, Iggk414, Iggk415, Iggk416, Iggk417, Iggk418, Iggk419, Iggk420, Iggk421, Iggk422, Iggk423, Iggk424, Iggk425, Iggk426, Iggk427, Iggk428, Iggk429, Iggk430, Iggk431, Iggk432, Iggk433, Iggk434, Iggk435, Iggk436, Iggk437, Iggk438, Iggk439, Iggk440, Iggk441, Iggk442, Iggk443, Iggk444, Iggk445, Iggk446, Iggk447, Iggk448, Iggk449, Iggk450, Iggk451, Iggk452, Iggk453, Iggk454, Iggk455, Iggk456, Iggk457, Iggk458, Iggk459, Iggk460, Iggk461, Iggk462, Iggk463, Iggk464, Iggk465, Iggk466, Iggk467, Iggk468, Iggk469, Iggk470, Iggk471, Iggk472, Iggk473, Iggk474, Iggk475, Iggk476, Iggk477, Iggk478, Iggk479, Iggk480, Iggk481, Iggk482, Iggk483, Iggk484, Iggk485, Iggk486, Iggk487, Iggk488, Iggk489, Iggk490, Iggk491, Iggk492, Iggk493, Iggk494, Iggk495, Iggk496, Iggk497, Iggk498, Iggk499, Iggk500, Iggk501, Iggk502, Iggk503, Iggk504, Iggk505, Iggk506, Iggk507, Iggk508, Iggk509, Iggk510, Iggk511, Iggk512, Iggk513, Iggk514, Iggk515, Iggk516, Iggk517, Iggk518, Iggk519, Iggk520, Iggk521, Iggk522, Iggk523, Iggk524, Iggk525, Iggk526, Iggk527, Iggk528, Iggk529, Iggk530, Iggk531, Iggk532, Iggk533, Iggk534, Iggk535, Iggk536, Iggk537, Iggk538, Iggk539, Iggk540, Iggk541, Iggk542, Iggk543, Iggk544, Iggk545, Iggk546, Iggk547, Iggk548, Iggk549, Iggk550, Iggk551, Iggk552, Iggk553, Iggk554, Iggk555, Iggk556, Iggk557, Iggk558, Iggk559, Iggk560, Iggk561, Iggk562, Iggk563, Iggk564, Iggk565, Iggk566, Iggk567, Iggk568, Iggk569, Iggk570, Iggk571, Iggk572, Iggk573, Iggk574, Iggk575, Iggk576, Iggk577, Iggk578, Iggk579, Iggk580, Iggk581, Iggk582, Iggk583, Iggk584, Iggk585, Iggk586, Iggk587, Iggk588, Iggk589, Iggk590, Iggk591, Iggk592, Iggk593, Iggk594, Iggk595, Iggk596, Iggk597, Iggk598, Iggk599, Iggk600, Iggk601, Iggk602, Iggk603, Iggk604, Iggk605, Iggk606, Iggk607, Iggk608, Iggk609, Iggk610, Iggk611, Iggk612, Iggk613, Iggk614, Iggk615, Iggk616, Iggk617, Iggk618, Iggk619, Iggk620, Iggk621, Iggk622, Iggk623, Iggk624, Iggk625, Iggk626, Iggk627, Iggk628, Iggk629, Iggk630, Iggk631, Iggk632, Iggk633, Iggk634, Iggk635, Iggk636, Iggk637, Iggk638, Iggk639, Iggk640, Iggk641, Iggk642, Iggk643, Iggk644, Iggk645, Iggk646, Iggk647, Iggk648, Iggk649, Iggk650, Iggk651, Iggk652, Iggk653, Iggk654, Iggk655, Iggk656, Iggk657, Iggk658, Iggk659, Iggk660, Iggk661, Iggk662, Iggk663, Iggk664, Iggk665, Iggk666, Iggk667, Iggk668, Iggk669, Iggk670, Iggk671, Iggk672, Iggk673, Iggk674, Iggk675, Iggk676, Iggk677, Iggk678, Iggk679, Iggk680, Iggk681, Iggk682, Iggk683, Iggk684, Iggk685, Iggk686, Iggk687, Iggk688, Iggk689, Iggk690, Iggk691, Iggk692, Iggk693, Iggk694, Iggk695, Iggk696, Iggk697, Iggk698, Iggk699, Iggk700, Iggk701, Iggk702, Iggk703, Iggk704, Iggk705, Iggk706, Iggk707, Iggk708, Iggk709, Iggk710, Iggk711, Iggk712, Iggk713, Iggk714, Iggk715, Iggk716, Iggk717, Iggk718, Iggk719, Iggk720, Iggk721, Iggk722, Iggk723, Iggk724, Iggk725, Iggk726, Iggk727, Iggk728, Iggk729, Iggk730, Iggk731, Iggk732, Iggk733, Iggk734, Iggk735, Iggk736, Iggk737, Iggk738, Iggk739, Iggk740, Iggk741, Iggk742, Iggk743, Iggk744, Iggk745, Iggk746, Iggk747, Iggk748, Iggk749, Iggk750, Iggk751, Iggk752, Iggk753, Iggk754, Iggk755, Iggk756, Iggk757, Iggk758, Iggk759, Iggk760, Iggk761, Iggk762, Iggk763, Iggk764, Iggk765, Iggk766, Iggk767, Iggk768, Iggk769, Iggk770, Iggk771, Iggk772, Iggk773, Iggk774, Iggk775, Iggk776, Iggk777, Iggk778, Iggk779, Iggk780, Iggk781, Iggk782, Iggk783, Iggk784, Iggk785, Iggk786, Iggk787, Iggk788, Iggk789, Iggk790, Iggk791, Iggk792, Iggk793, Iggk794, Iggk795, Iggk796, Iggk797, Iggk798, Iggk799, Iggk800, Iggk801, Iggk802, Iggk803, Iggk804, Iggk805, Iggk806, Iggk807, Iggk808, Iggk809, Iggk810, Iggk811, Iggk812, Iggk813, Iggk814, Iggk815, Iggk816, Iggk817, Iggk818, Iggk819, Iggk820, Iggk821, Iggk822, Iggk823, Iggk824, Iggk825, Iggk826, Iggk827, Iggk828, Iggk829, Iggk830, Iggk831, Iggk832, Iggk833, Iggk834, Iggk835, Iggk836, Iggk837, Iggk838, Iggk839, Iggk840, Iggk841, Iggk842, Iggk843, Iggk844, Iggk845, Iggk846, Iggk847, Iggk848, Iggk849, Iggk850, Iggk851, Iggk852, Iggk853, Iggk854, Iggk855, Iggk856, Iggk857, Iggk858, Iggk859, Iggk860, Iggk861, Iggk862, Iggk863, Iggk864, Iggk865, Iggk866, Iggk867, Iggk868, Iggk869, Iggk870, Iggk871, Iggk872, Iggk873, Iggk874, Iggk875, Iggk876, Iggk877, Iggk878, Iggk879, Iggk880, Iggk881, Iggk882, Iggk883, Iggk884, Iggk885, Iggk886, Iggk887, Iggk888, Iggk889, Iggk890, Iggk891, Iggk892, Iggk893, Iggk894, Iggk895, Iggk896, Iggk897, Iggk898, Iggk899, Iggk900, Iggk901, Iggk902, Iggk903, Iggk904, Iggk905, Iggk906, Iggk907, Iggk908, Iggk909, Iggk910, Iggk911, Iggk912, Iggk913, Iggk914, Iggk915, Iggk916, Iggk917, Iggk918, Iggk919, Iggk920, Iggk921, Iggk922, Iggk923, Iggk924, Iggk925, Iggk926, Iggk927, Iggk928, Iggk929, Iggk930, Iggk931, Iggk932, Iggk933, Iggk934, Iggk935, Iggk936, Iggk937, Iggk938, Iggk939, Iggk940, Iggk941, Iggk942, Iggk943, Iggk944, Iggk945, Iggk946, Iggk947, Iggk948, Iggk949, Iggk950, Iggk951, Iggk952, Iggk953, Iggk954, Iggk955, Iggk956, Iggk957, Iggk958, Iggk959, Iggk960, Iggk961, Iggk962, Iggk963, Iggk964, Iggk965, Iggk966, Iggk967, Iggk968, Iggk969, Iggk970, Iggk971, Iggk972, Iggk973, Iggk974, Iggk975, Iggk976, Iggk977, Iggk978, Iggk979, Iggk980, Iggk981, Iggk982, Iggk983, Iggk984, Iggk985, Iggk986, Iggk987, Iggk988, Iggk989, Iggk990, Iggk991, Iggk992, Iggk993, Iggk994, Iggk995, Iggk996, Iggk997, Iggk998, Iggk999, Iggk1000, Iggk1001, Iggk1002, Iggk1003, Iggk1004, Iggk1005, Iggk1006, Iggk1007, Iggk1008, Iggk1009, Iggk1010, Iggk1011, Iggk1012, Iggk1013, Iggk1014, Iggk1015, Iggk1016, Iggk1017, Iggk1018, Iggk1019, Iggk1020, Iggk1021, Iggk1022, Iggk1023, Iggk1024, Iggk1025, Iggk1026, Iggk1027, Iggk1028, Iggk1029, Iggk1030, Iggk1031, Iggk1032, Iggk1033, Iggk1034, Iggk1035, Iggk1036, Iggk1037, Iggk1038, Iggk1039, Iggk1040, Iggk1041, Iggk1042, Iggk1043, Iggk1044, Iggk1045, Iggk1046, Iggk1047, Iggk1048, Iggk1049, Iggk1050, Iggk1051, Iggk1052, Iggk1053, Iggk1054, Iggk1055, Iggk1056, Iggk1057, Iggk1058, Iggk1059, Iggk1060, Iggk1061, Iggk1062, Iggk1063, Iggk1064, Iggk1065, Iggk1066, Iggk1067, Iggk1068, Iggk1069, Iggk1070, Iggk1071, Iggk1072, Iggk1073, Iggk1074, Iggk1075, Iggk1076, Iggk1077, Iggk1078, Iggk1079, Iggk1080, Iggk1081, Iggk1082, Iggk1083, Iggk1084, Iggk1085, Iggk1086, Iggk1087, Iggk1088, Iggk1089, Iggk1090, Iggk1091, Iggk1092, Iggk1093, Iggk1094, Iggk1095, Iggk1096, Iggk1097, Iggk1098, Iggk1099, Iggk1100, Iggk1101, Iggk1102, Iggk1103, Iggk1104, Iggk1105, Iggk1106, Iggk1107, Iggk1108, Iggk1109, Iggk1110, Iggk1111, Iggk1112, Iggk1113, Iggk1114, Iggk1115, Iggk1116, Iggk1117, Iggk1118, Iggk1119, Iggk1120, Iggk1121, Iggk1122, Iggk1123, Iggk1124, Iggk1125, Iggk1126, Iggk1127, Iggk1128, Iggk1129, Iggk1130, Iggk1131, Iggk1132, Iggk1133, Iggk1134, Iggk1135, Iggk1136, Iggk1137, Iggk1138, Iggk1139, Iggk1140, Iggk1141, Iggk1142, Iggk1143, Iggk1144, Iggk1145, Iggk1146, Iggk1147, Iggk1148, Iggk1149, Iggk1150, Iggk1151, Iggk1152, Iggk1153, Iggk1154, Iggk1155, Iggk1156, Iggk1157, Iggk1158, Iggk1159, Iggk1160, Iggk1161, Iggk1162, Iggk1163, Iggk1164, Iggk1165, Iggk1166, Iggk1167, Iggk1168, Iggk1169, Iggk1170, Iggk1171, Iggk1172, Iggk1173, Iggk1174, Iggk1175, Iggk1176, Iggk1177, Iggk1178, Iggk1179, Iggk1180, Iggk1181, Iggk1182, Iggk1183, Iggk1184, Iggk1185, Iggk1186, Iggk1187, Iggk1188, Iggk1189, Iggk1190, Iggk1191, Iggk1192, Iggk1193, Iggk1194, Iggk1195, Iggk1196, Iggk1197, Iggk1198, Iggk1199, Iggk1200, Iggk1201, Iggk1202, Iggk1203, Iggk1204, Iggk1205, Iggk1206, Iggk1207, Iggk1208, Iggk1 |

# Pathway Analysis Using IPA Software; canonical pathway

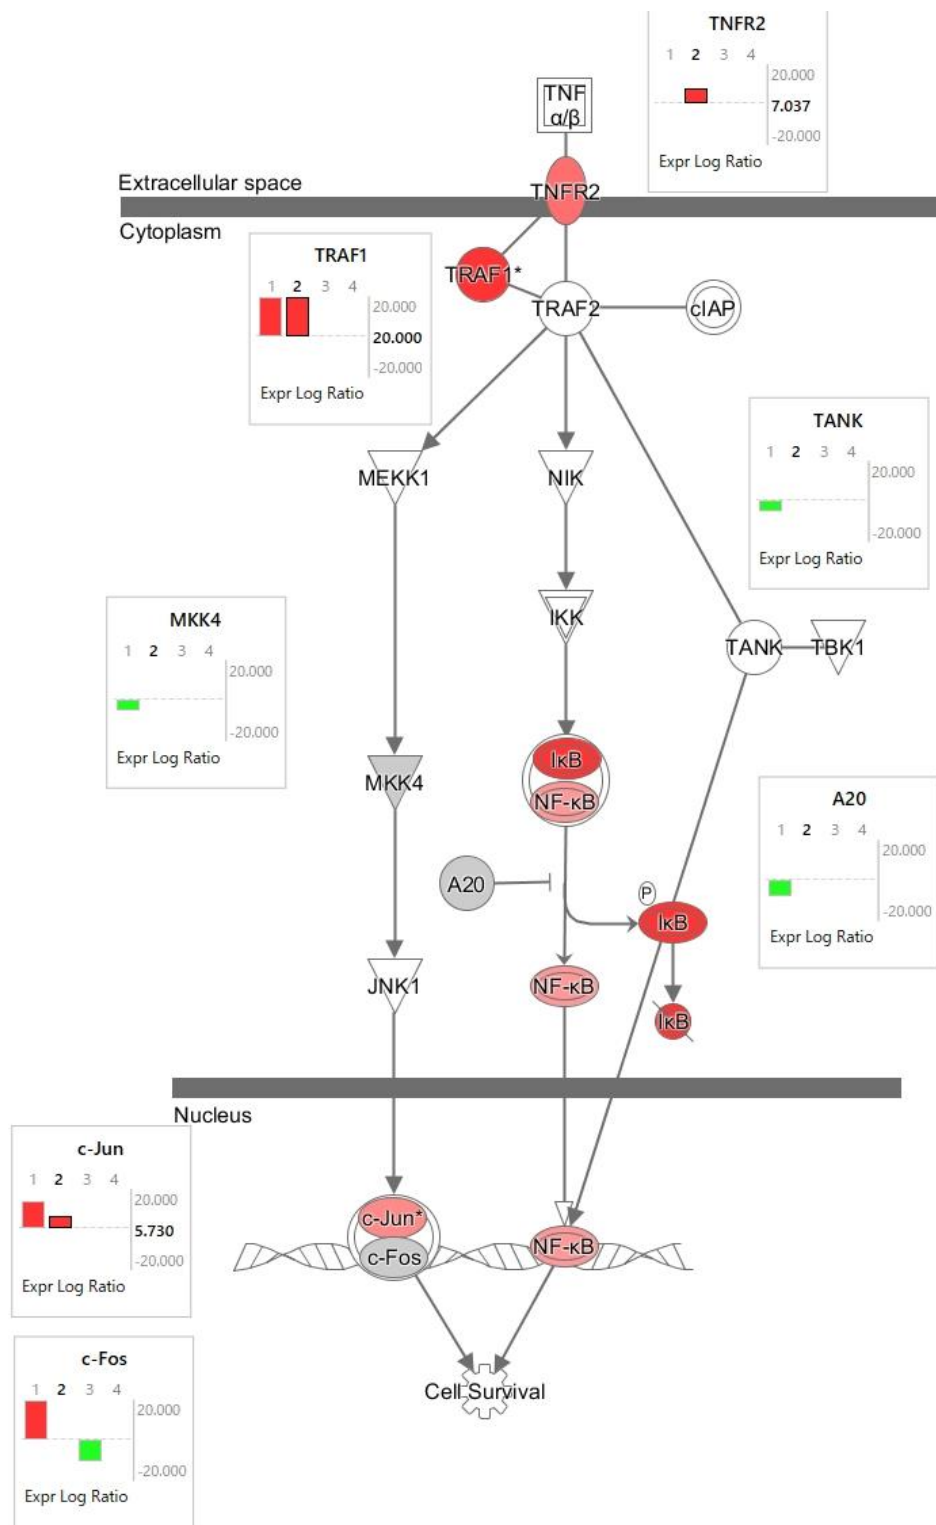

**Figure S7. TNFR2 Signaling**

1. 1 h; 2. 6 h; 3. 24 h; 4. 8 days.

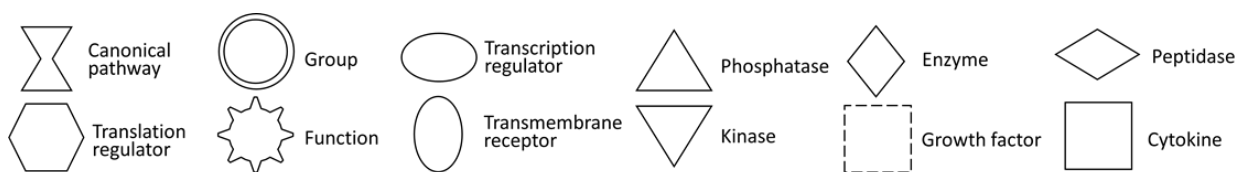

Red: Increased, FDR<0.05 versus solvent control

Green: Decreased, FDR<0.05 versus solvent control

| Symbol   | Synonym(s)                                                                                                                                                                                                                                                                                                                                                                    |
|----------|-------------------------------------------------------------------------------------------------------------------------------------------------------------------------------------------------------------------------------------------------------------------------------------------------------------------------------------------------------------------------------|
| Ap1      | activator protein-1, c-Jun                                                                                                                                                                                                                                                                                                                                                    |
| c-Iap    | IAP, NAIP                                                                                                                                                                                                                                                                                                                                                                     |
| FOS      | AP-1, c-f, C-FOS, D12Rfj, D12Rfj1, FBj osteosarcoma oncogene, Fos proto-oncogene, AP-1 transcription factor subunit, p55                                                                                                                                                                                                                                                      |
| Ikb      | I KAPPA B, Ikbeta, Ikβ, Ik-B                                                                                                                                                                                                                                                                                                                                                  |
| IkB-NfκB | IkappaB-NFkappaB, IkB-NFκB, NFκB-IkB                                                                                                                                                                                                                                                                                                                                          |
| JUN      | Activator protein 1, AP-1, API-1, c-ju, cJUN, Junc, jun proto-oncogene, Jun proto-oncogene, AP-1 transcription factor subunit, LOC100288387, LOC100291417, LOC100293034, p39, v-Jun, V-jun Avian Sarcoma Virus 17 Oncogene Homolog, V-jun Sarcoma Virus 17 Oncogene Homolog                                                                                                   |
| MAP2K4   | JNKK, JNKK1, MAPK/ERK KINASE-1, MAPKK4, MEK4, mitogen-activated protein kinase kinase 4, MKK4, PRKMK4, SAPKK-1, Sek, SEK1, Ser, SERK1, SKK1                                                                                                                                                                                                                                   |
| MAP3K1   | LOC100912399, MAPK, MAPKKK1, MEKK, MEKK 1, MEK KINASE, MEK KINASE 1, mitogen-activated protein kinase kinase 1, mitogen-activated protein kinase kinase kinase 1-like, Raf, SRXY6                                                                                                                                                                                             |
| MAP3K14  | aly, FTDCR1B, HS, HSNIK, mitogen-activated protein kinase kinase kinase 14, N, NFκB INDUCING KINASE, nf κ b inducing kinase, NIK                                                                                                                                                                                                                                              |
| MAPK8    | A1849689, C-JUN N-TERMINAL KINASE1, JNK, JNK1, JNK1A2, JNK21B1/2, JNK-46, mitogen-activated protein kinase 8, p46JNK1, p46JNK1 alpha, p46JNK1 α, Prk, PRKM8, SAPK1, SAPK1c, Sapk gamma, SAPK P46, Sapk γ, STRESS-ACTIVATED protein KINASE-LIKE KINASE                                                                                                                         |
| NFκB     | NF-KAPPA B, NF-κ B, nuclear factor-κ b, transcription factor nuclear factor κ b                                                                                                                                                                                                                                                                                               |
| TANK     | C86182, E430026L09Rik, I-T, I-TRAF, TRAF2, TRAF family member-associated NF-kappa B activator, TRAF family member-associated NFκB activator, TRAF family member-associated Nf-κ B activator, TRAF-INTERACTING protein 1-TRAF                                                                                                                                                  |
| TBK1     | I200008B05Rik, A1462036, AW048562, FTDALS4, IIAE8, LOC299827, NAK, T2K, TANK-binding kinase 1, Tbk                                                                                                                                                                                                                                                                            |
| TNF-A/B  | TNF alpha/beta, TNF α/β                                                                                                                                                                                                                                                                                                                                                       |
| TNFAIP3  | A2, A20, AISBL, MAD6, OTUD7C, Tnf, TNFA1P2, TNF alpha-INDUCED protein 3, TNF-inducible early response, Tnfp3, TNF α-INDUCED protein 3, tumor necrosis factor, alpha-induced protein 3, tumor necrosis factor, α-induced protein 3, tumour necrosis factor, alpha-induced protein 3, tumour necrosis factor, α-induced protein 3                                               |
| TNFRSF1B | CD120b, p7, p70TNFR, p75, p75TNFR, p80, P80 TNF receptor, TBP1I, TN, TNF-, TNF-a, TNFα, TNF-alphaR2, TNF alpha RII, TNFBR, TNF-R, Tnfr-1, TNFR1B, TNF-R2, TNF-R75, TNFR80, TNF receptor superfamily member 1B, TNF-R-II, TNF-RII/TNFRSF1B, TNFR P75, TNF α RII, tumor necrosis factor receptor superfamily, member 1b, tumour necrosis factor receptor superfamily, member 1b |
| TRAF1    | 4732496E14Rik, EBI6, ineligibletraf1, MGC:10353, TNF receptor-associated factor 1                                                                                                                                                                                                                                                                                             |
| TRAF2    | A1325259, MGC:45012, RNF117, TNF receptor-associated factor 2, TRAP, TRAP3                                                                                                                                                                                                                                                                                                    |

# Pathway Analysis Using IPA Software; canonical pathway

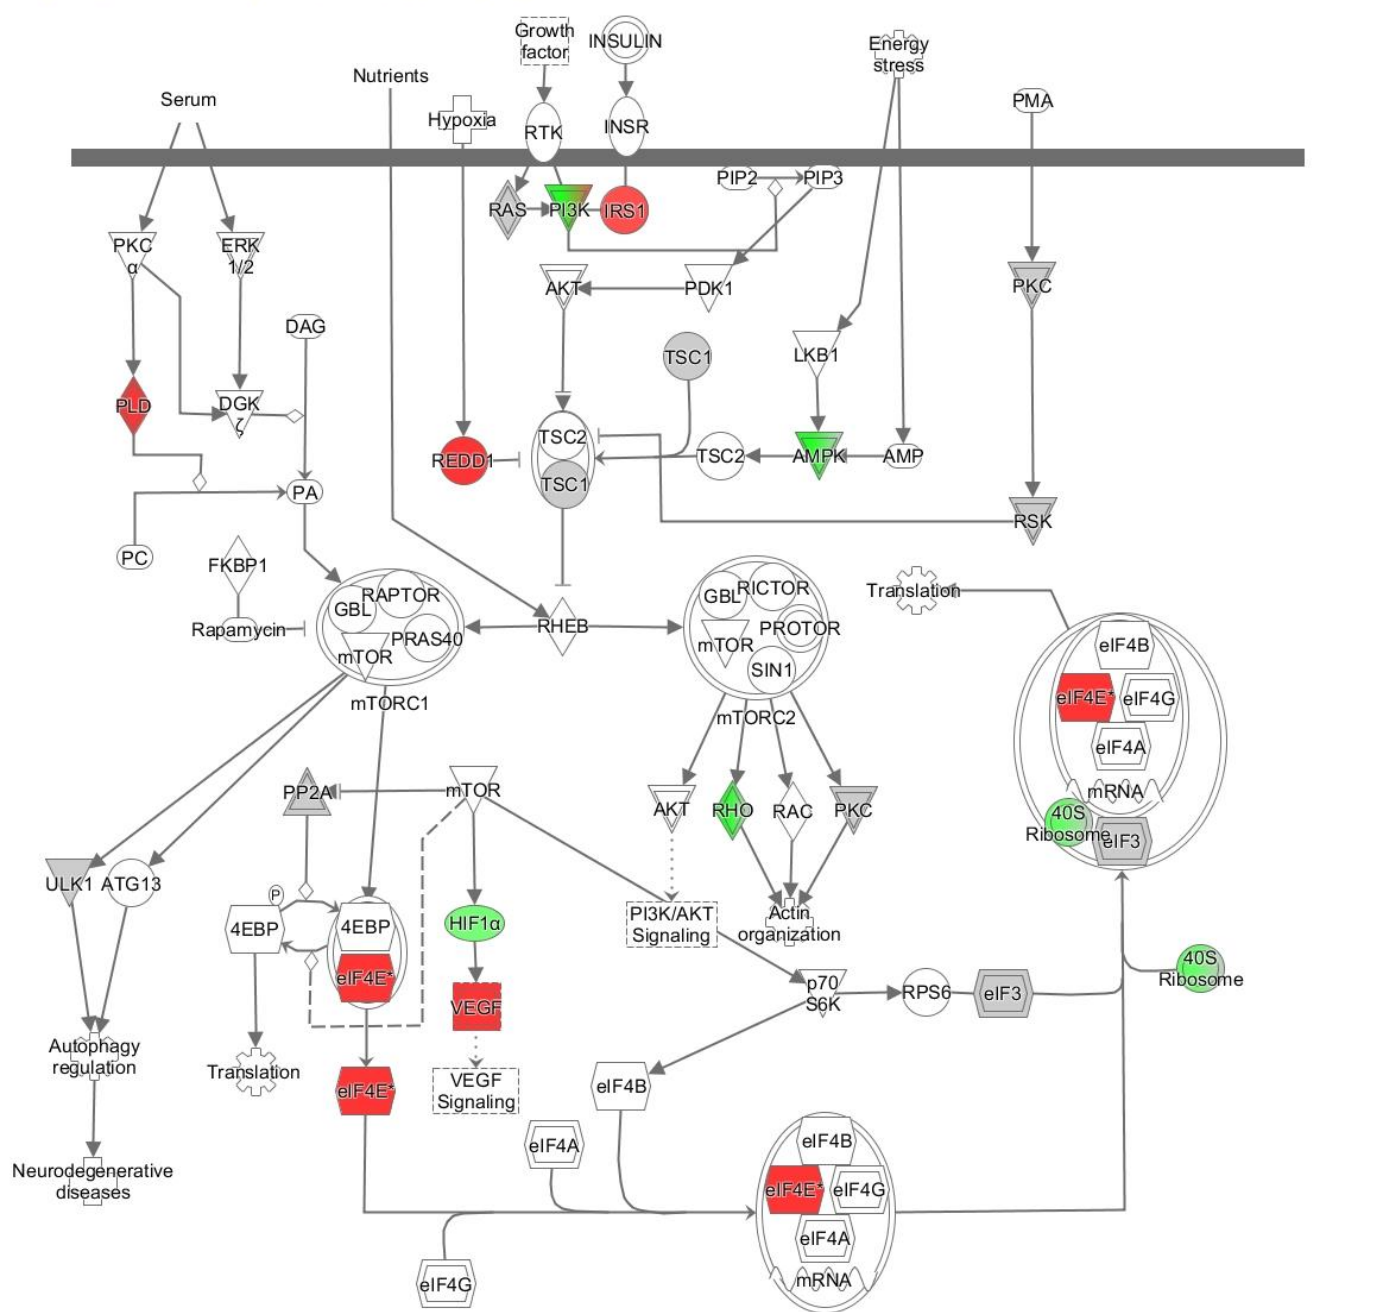

Figure S8. mTOR Signaling at 1 h

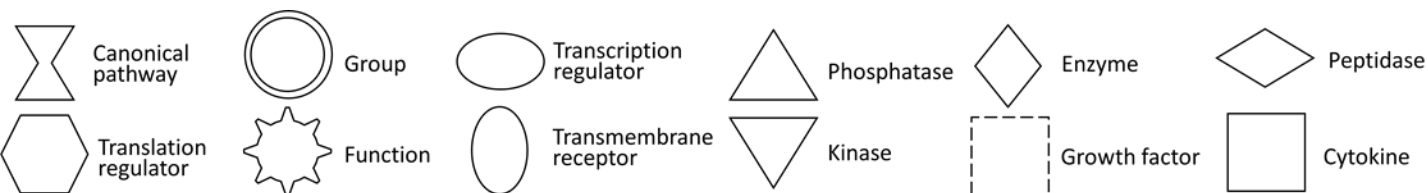

Red: Increased, FDR<0.05 versus solvent control

Green: Decreased, FDR<0.05 versus solvent control

| Symbol               | Synonym(s)                                                                                                                                                                                                                                                                                                                                                                                                                                                                                                                                                                                                                                                                                                                                                                                                                                                                                                                                                                                                                                                                                                                                                                                      |
|----------------------|-------------------------------------------------------------------------------------------------------------------------------------------------------------------------------------------------------------------------------------------------------------------------------------------------------------------------------------------------------------------------------------------------------------------------------------------------------------------------------------------------------------------------------------------------------------------------------------------------------------------------------------------------------------------------------------------------------------------------------------------------------------------------------------------------------------------------------------------------------------------------------------------------------------------------------------------------------------------------------------------------------------------------------------------------------------------------------------------------------------------------------------------------------------------------------------------------|
| 4EBP-eIF4E           | eIF4E-eIF4EBP                                                                                                                                                                                                                                                                                                                                                                                                                                                                                                                                                                                                                                                                                                                                                                                                                                                                                                                                                                                                                                                                                                                                                                                   |
| AKT                  | AKT1/2/3, B/Akt, PKB, RAC-PK                                                                                                                                                                                                                                                                                                                                                                                                                                                                                                                                                                                                                                                                                                                                                                                                                                                                                                                                                                                                                                                                                                                                                                    |
| AKT1S1               | 1110012J22RIK, A1227026, A1430011, AKT1 substrate 1, AKT1 substrate 1 (proline-rich), Lo, Lobe, Lobel, PR, PRAS, PRAS40, Proline-rich AKT substrate                                                                                                                                                                                                                                                                                                                                                                                                                                                                                                                                                                                                                                                                                                                                                                                                                                                                                                                                                                                                                                             |
| AMP                  | 1490022-20-8, [(2R,3S,4R,5R)-5-(6-aminopurin-9-yl)-3,4-dihydroxyoxolan-2-yl]methyl dihydrogen phosphate, 5'-adenylic acid, 5' AMP, 5'-AMP, 61-19-8, adenosine-5-monophosphate, adenosine monophosphate, C10H14N5O7P                                                                                                                                                                                                                                                                                                                                                                                                                                                                                                                                                                                                                                                                                                                                                                                                                                                                                                                                                                             |
| AMPK                 | AMP-activated kinase, AMP KINASE, Amp-pk                                                                                                                                                                                                                                                                                                                                                                                                                                                                                                                                                                                                                                                                                                                                                                                                                                                                                                                                                                                                                                                                                                                                                        |
| ATG13                | 1110053A20Rik, autophagy related 13, D2ErtD391, D2ErtD391e, Harbi1, Harbi1l, KIAA0652, PARATARG8, RGD1310685                                                                                                                                                                                                                                                                                                                                                                                                                                                                                                                                                                                                                                                                                                                                                                                                                                                                                                                                                                                                                                                                                    |
| DAG                  | DAG, diacylglycerides, diglyceride                                                                                                                                                                                                                                                                                                                                                                                                                                                                                                                                                                                                                                                                                                                                                                                                                                                                                                                                                                                                                                                                                                                                                              |
| DDIT4                | 5830413E08RIK, AA415483, Dig, Dig2, DKFZP564O2071, DNA-damage-inducible transcript 4, FLJ20500, REDD, REDD-1, Rtp8, Rtp801                                                                                                                                                                                                                                                                                                                                                                                                                                                                                                                                                                                                                                                                                                                                                                                                                                                                                                                                                                                                                                                                      |
| DGKZ                 | 80-kDa Dg Kinase, DAGK5, DAGK6, Dgk4, DGK-ZETA, DGK-ζ, Diacylglycerol kinase, diacylglycerol kinase zeta, diacylglycerol kinase ζ, E130307B02Rik, F730209L11Rik, hDGKzeta, KDGZ, mDGK[z]                                                                                                                                                                                                                                                                                                                                                                                                                                                                                                                                                                                                                                                                                                                                                                                                                                                                                                                                                                                                        |
| Eif4a                | Eukaryotic translation initiation factor 4a, Homologous to SP P44586 ATP-dependent RNA helicase DEAD                                                                                                                                                                                                                                                                                                                                                                                                                                                                                                                                                                                                                                                                                                                                                                                                                                                                                                                                                                                                                                                                                            |
| EIF4B                | 2310046H11RIK, AL024095, C85189, Eif4a2, eIF4B, eukaryotic translation initiation factor 4B, Initiation Factor M3, PRO1843                                                                                                                                                                                                                                                                                                                                                                                                                                                                                                                                                                                                                                                                                                                                                                                                                                                                                                                                                                                                                                                                      |
| EIF4E                | AUTS19, CAP-binding, CBP, EG668879, eIF-4, EIF4E1, EIF4EL1, Eif4e-ps, EIF4F, eukaryotic translation initiation factor 4E, If4, If4e                                                                                                                                                                                                                                                                                                                                                                                                                                                                                                                                                                                                                                                                                                                                                                                                                                                                                                                                                                                                                                                             |
| EIF4EBP1             | 4e-bp, 4E-BP1, AA959816, BP-1, Eukaryotic translation initiation factor 4e binding protein 1, PH, PHAS-I                                                                                                                                                                                                                                                                                                                                                                                                                                                                                                                                                                                                                                                                                                                                                                                                                                                                                                                                                                                                                                                                                        |
| eIF4G                | eIF4gamma, eIF4y                                                                                                                                                                                                                                                                                                                                                                                                                                                                                                                                                                                                                                                                                                                                                                                                                                                                                                                                                                                                                                                                                                                                                                                |
| ERK1/2               | MAPK p44/42, MAPK p44/p42, p42/44 mapk, P42/p44 erk, P42/p44 mapk, p42/p44 MAP KINASE                                                                                                                                                                                                                                                                                                                                                                                                                                                                                                                                                                                                                                                                                                                                                                                                                                                                                                                                                                                                                                                                                                           |
| FKBP1A               | FK506 binding protein 1a, Fkb, Fkbp, FKBP1, FKBP-12, Fkbp2, FKBP prolyl isomerase 1A, FPK1, macrophilin-12, PKC12, PKC12, PPIASE                                                                                                                                                                                                                                                                                                                                                                                                                                                                                                                                                                                                                                                                                                                                                                                                                                                                                                                                                                                                                                                                |
| HIF1A                | AA959795, bHLHe7, bHLHe78, HIF-1, HIF1-ALPHA, HIF-1alpha (hydroxylated), HIF-1-α, HIF-1α (hydroxylated), Hypoxia inducible factor 1 alpha subunit, hypoxia inducible factor 1, alpha subunit, hypoxia inducible factor 1 subunit alpha, hypoxia inducible factor 1 subunit α, Hypoxia inducible factor 1 α subunit, hypoxia inducible factor 1, α subunit, MO, MOP1, PASD8                                                                                                                                                                                                                                                                                                                                                                                                                                                                                                                                                                                                                                                                                                                                                                                                                      |
| INSR                 | 4932439J01RIK, alpha subunit INSULIN receptor, CD220, D630014A15RIK, HHF5, I, insulin receptor, INSULIN receptor B, Insulin receptor beta, INSULIN receptor KINASE, Insulin receptor β, INSULIN RPTK, IR, IR alpha, IR-B, IRK, IR α, α subunit INSULIN receptor                                                                                                                                                                                                                                                                                                                                                                                                                                                                                                                                                                                                                                                                                                                                                                                                                                                                                                                                 |
| INSULIN              | Ins, Ins1/2, proinsulin                                                                                                                                                                                                                                                                                                                                                                                                                                                                                                                                                                                                                                                                                                                                                                                                                                                                                                                                                                                                                                                                                                                                                                         |
| IRS1                 | ENSMSG00000022591, G972, G972R, HIRS-1, insulin receptor substrate 1, IR, IRS1IRM                                                                                                                                                                                                                                                                                                                                                                                                                                                                                                                                                                                                                                                                                                                                                                                                                                                                                                                                                                                                                                                                                                               |
| MAPKAP1              | A1591529, D230039K05RIK, JC310, MAPK associated protein 1, MIP1, mitogen-activated protein kinase associated protein 1, mSIN1, S, SIN1                                                                                                                                                                                                                                                                                                                                                                                                                                                                                                                                                                                                                                                                                                                                                                                                                                                                                                                                                                                                                                                          |
| MLST8                | 0610033N12RIK, AA409454, A1505104, A1851821, Gb, Gbetal, GBL, GβL, LST8, mLS, MTOR associated protein, LST8 homolog, MTOR associated protein, LST8 homolog (S. cerevisiae), POP3, WAT1                                                                                                                                                                                                                                                                                                                                                                                                                                                                                                                                                                                                                                                                                                                                                                                                                                                                                                                                                                                                          |
| MTOR                 | 2610315D21RIK, A1327068, fl, Flat, Fr, FRAP, FRAP1, FRAP2, FRB, mechanistic target of rapamycin kinase, RA, RAF, RAFT1, RAPT1, RRAFT1, SKS                                                                                                                                                                                                                                                                                                                                                                                                                                                                                                                                                                                                                                                                                                                                                                                                                                                                                                                                                                                                                                                      |
| PA                   | 1,2-diacyl-sn-glycerol-3-phosphate, diacylglycerophosphates, PA, phospholipids alcohol, PtdOH                                                                                                                                                                                                                                                                                                                                                                                                                                                                                                                                                                                                                                                                                                                                                                                                                                                                                                                                                                                                                                                                                                   |
| PC                   | 3-sn-phosphatidylcholine, C10H18NO8PR2, choline glycerophospholipid, diacylglycerophosphocholines, lecithin, lecithins, lecithin, soy, lecithin, soybean, LT-02, PC, phosphatidylcholine, soya phosphatidyl choline, soybean phospholipids, soy lecithin                                                                                                                                                                                                                                                                                                                                                                                                                                                                                                                                                                                                                                                                                                                                                                                                                                                                                                                                        |
| PDPK1                | 3'-PDK, 3-phosphoinositide dependent protein kinase-1, Pdk, PDK1, PDPK2, PDPK2P, PRO0461                                                                                                                                                                                                                                                                                                                                                                                                                                                                                                                                                                                                                                                                                                                                                                                                                                                                                                                                                                                                                                                                                                        |
| PI3K                 | 1-phosphatidylinositol 3-kinase, 2.7.1.137, ATP:1-phosphatidyl-1D-myo-inositol 3-phosphotransferase, Phosphatidylinositol 3 kinase, phosphatidylinositol 3'-kinase, PI3-kinase, PtdIns 3 Kinase, type III phosphoinositide 3-kinase, type I phosphatidylinositol kinase, Vps34p                                                                                                                                                                                                                                                                                                                                                                                                                                                                                                                                                                                                                                                                                                                                                                                                                                                                                                                 |
| PIP2                 | 1,2-diacyl-sn-glycero-3-phospho-(1'-myo-inositol-4',5'-bisphosphate), 1-O-(3-sn-phosphatidyl)-1D-myo-inositol 4,5-bis(dihydrogen phosphate), 1-phosphatidyl-1D-myo-inositol 4,5-bisphosphate, C11H19O19P3R2                                                                                                                                                                                                                                                                                                                                                                                                                                                                                                                                                                                                                                                                                                                                                                                                                                                                                                                                                                                     |
| PIP3                 | 1-phosphatidyl-1D-myo-inositol 3,4,5-trisphosphate, phosphatidylinositol 3,4,5-trisphosphate, phosphoinositide (3,4,5) P3, PI(3,4,5)P3, Plns(3,4,5)P3, PIP3, PtdIns(3,4,5)P3                                                                                                                                                                                                                                                                                                                                                                                                                                                                                                                                                                                                                                                                                                                                                                                                                                                                                                                                                                                                                    |
| PKC                  | Cnpkc, PKC, Pkc(s), Protein Kinase C                                                                                                                                                                                                                                                                                                                                                                                                                                                                                                                                                                                                                                                                                                                                                                                                                                                                                                                                                                                                                                                                                                                                                            |
| PLD                  | 3.1.4.4, choline phosphatase, lecithinase D, lipophosphodiesterase II, phosphatidylcholine phosphatidohydrolase, PHOSPHOLIPASE D                                                                                                                                                                                                                                                                                                                                                                                                                                                                                                                                                                                                                                                                                                                                                                                                                                                                                                                                                                                                                                                                |
| PMA                  | 12-O-tetradecanoylphorbol-13-acetate, 16561-29-8, [(1S,2S,6R,10S,11R,13S,14R,15R)-13-acetyloxy-1,6-dihydroxy-8-(hydroxymethyl)-4,12,12,15-tetramethyl-5-oxo-14-tetracyclo[8.5.0.02,6.011,13]pentadeca-3,8-dienyl] tetradecanoate, 4beta-PMA, beta-PMA, C36H56O8, myristic acid, 9-ester with 1,1a-alpha,1b-beta,4,4a,7a-alpha,7b,8,9,9a-decahydro-4a-beta,7b-alpha,9-beta,9a-alpha-tetrahydroxy-3-(hydroxymethyl)-1,1,6,8-alpha-tetramethyl-5H-cyclopropa(3,4)benz(1,2-e)azulen-5-one, 9a-acetate, myristic acid, 9-ester with 1,1a-α,1b-β,4,4a,7a-α,7b,8,9,9a-decahydro-4a-β,7b-α,9-β,9a-α-tetrahydroxy-3-(hydroxymethyl)-1,1,6,8-α-tetramethyl-5H-cyclopropa(3,4)benz(1,2-e)azulen-5-one, 9a-acetate, phorbol 12-myristate 13-acetate, phorbol myristate acetate, PMA, tetradecanoic acid, 9a-(acetyloxy)-1a,1b,4,4a,5,7a,7b,8,9,9a-decahydro-4a,7b-dihydroxy-3-(hydroxymethyl)-1,1,6,8-tetramethyl-5-oxo-1H-cyclopropa(3,4)benz(1,2-e)azulen-9-yl ester, (1aR-(1aalpha,1bbeta,4abeta,7aalpha,7balpha,8alpha,9beta,9aalpha))-, tetradecanoyl-phorbol-13-acetate, TPA, β-12-O-tetradecanoylphorbol-13-acetate, β-phorbol 12-myristate 13-acetate, β-phorbol-12 β-myristate-13 α-acetate, β-PMA |
| PP2A                 | protein PHOSPHATASE 2A, Protein Phosphatase Type2a                                                                                                                                                                                                                                                                                                                                                                                                                                                                                                                                                                                                                                                                                                                                                                                                                                                                                                                                                                                                                                                                                                                                              |
| PRKCA                | AAG6, A1875142, LOC146784, Pk, PKCA, PKC-alpha, PKC1+/-, PKC-α, PKRCA, PRKACA, protein kinase C alpha, protein kinase C, alpha, protein kinase C α, protein kinase C, α, α-protein kinase C                                                                                                                                                                                                                                                                                                                                                                                                                                                                                                                                                                                                                                                                                                                                                                                                                                                                                                                                                                                                     |
| RAC1                 | AL023026, D5ErtD559, D5ErtD559e, MIG5, MRD48, p21-Rac1, p21-RAC, Rac, Rac family small GTPase 1, TC-25                                                                                                                                                                                                                                                                                                                                                                                                                                                                                                                                                                                                                                                                                                                                                                                                                                                                                                                                                                                                                                                                                          |
| Rapamycin            | 1402453-65-9, (1R,9S,12S,15R,16E,18R,19R,21R,23S,24E,26E,28E,30S,35R)-1,18-dihydroxy-12-[(2R)-1-[(1S,3R,4R)-4-hydroxy-3-methoxycyclohexyl]propan-2-yl]-19,30-dimethoxy-15,17,21,23,29,35-hexamethyl-11,36-dioxo-4-azatricyclo[30.3.1.04,9]hexatriaconta-16,24,26,28-tetraene-2,3,10,14,20-pentone, (3S,6R,7E,9R,10R,12R,14S,15E,17E,19E,21S,23S,26R,27R,34aS)-9,10,12,13,14,21,22,23,24,25,26,27,32,33,34,34a-Hexadecahydro-9,27-dihydroxy-3-[(1R)-2-[(1S,3R,4R)-4-hydroxy-3-methoxycyclohexyl]-1-methylethyl]-10,21-dimethoxy-6,8,12,14,20,26-hexamethyl-23,27-epoxy-3H-pyrido[2,1-c][1,4]oxaazacyclohentacontine-1,5,11,28,29(4H,6H,31H)-pentone, 53123-88-9, ABI-009, AY 22-989, C51H79NO13, erapa, I-2190A, nab-rapamycin, nanoparticle albumin-bound rapamycin, NSC 226080, Rapamune, Rapamycin, SEL-110, SILA 9268A, SVP-rapamycin, WY-090217                                                                                                                                                                                                                                                                                                                                             |
| RHEB                 | Ras homolog enriched in brain, Ras homolog, mTORC1 binding, RHEB1, RHEB2                                                                                                                                                                                                                                                                                                                                                                                                                                                                                                                                                                                                                                                                                                                                                                                                                                                                                                                                                                                                                                                                                                                        |
| RHO                  | GTPase Rho, Rho, Rho Family, RHO-GTPASE, Rho-like Gtpase                                                                                                                                                                                                                                                                                                                                                                                                                                                                                                                                                                                                                                                                                                                                                                                                                                                                                                                                                                                                                                                                                                                                        |
| Ribosomal40s subunit | 40s, 40S ribosomal subunit, 40S RIBOSOME                                                                                                                                                                                                                                                                                                                                                                                                                                                                                                                                                                                                                                                                                                                                                                                                                                                                                                                                                                                                                                                                                                                                                        |
| RICTOR               | 4921505C17RIK, 6030405M08RIK, AVO3, AW492497, D530039E11RIK, hAVO3, KIAA1999, Mtorc2, PIA, RPTOR independent companion of MTOR complex 2, RPTOR independent companion of MTOR, complex 2                                                                                                                                                                                                                                                                                                                                                                                                                                                                                                                                                                                                                                                                                                                                                                                                                                                                                                                                                                                                        |
| RPS6                 | 40S ribosomal protein S6-like, LOC100911372, pp33, Q9BZU1, RIBOSOMAL protein S6, S, S6, S6R, S6RP                                                                                                                                                                                                                                                                                                                                                                                                                                                                                                                                                                                                                                                                                                                                                                                                                                                                                                                                                                                                                                                                                               |
| RPS6KB1              | 261031815RIK, 4732464A07RIK, AA959758, A1256796, A1314060, P70, p70/85s, p70/85s6k, p70-alpha, p70s, p70S6, p70s6k, P70S6K1, p70 S6K-alpha, p70S6 kinase, p70 S6K-α, p70(S6K)-α, p70-α, PS6K, ribosomal protein S6 kinase B1, ribosomal protein S6 kinase, polypeptide 1, S6K, S6K1, S6K-beta-1, S6K-β-1, STK14A                                                                                                                                                                                                                                                                                                                                                                                                                                                                                                                                                                                                                                                                                                                                                                                                                                                                                |
| RPTOR                | 4932417H02RIK, KOG1, Mip1, mKIAA1303, r, Rap, RAPTOR, regulatory associated protein of MTOR complex 1, regulatory associated protein of MTOR, complex 1, RGD1311784                                                                                                                                                                                                                                                                                                                                                                                                                                                                                                                                                                                                                                                                                                                                                                                                                                                                                                                                                                                                                             |
| RSK                  | p90RSK                                                                                                                                                                                                                                                                                                                                                                                                                                                                                                                                                                                                                                                                                                                                                                                                                                                                                                                                                                                                                                                                                                                                                                                          |
| STK11                | AA408040, hLKB1, Lkb, LKB1, LKB1-L, LKB1(S), Pa, Par-4, PJS, R75140, serine/threonine kinase 11, Stk11 isoform 2, Stk11 short isoform                                                                                                                                                                                                                                                                                                                                                                                                                                                                                                                                                                                                                                                                                                                                                                                                                                                                                                                                                                                                                                                           |
| TSC1                 | ham, Hamartin, LAM, TSC, TSC complex subunit 1                                                                                                                                                                                                                                                                                                                                                                                                                                                                                                                                                                                                                                                                                                                                                                                                                                                                                                                                                                                                                                                                                                                                                  |
| Tsc1-Tsc2            | TSC, TSC1/2                                                                                                                                                                                                                                                                                                                                                                                                                                                                                                                                                                                                                                                                                                                                                                                                                                                                                                                                                                                                                                                                                                                                                                                     |
| TSC2                 | LAM, Na, Nafld, PPP1R160, Rc, Tcs2, TSC4, TSC complex subunit 2, tube, TUBERIN                                                                                                                                                                                                                                                                                                                                                                                                                                                                                                                                                                                                                                                                                                                                                                                                                                                                                                                                                                                                                                                                                                                  |
| ULK1                 | ATG1, ATG1A, AU041434, hATG1, mKIAA0722, ULK, Ulk1 mapped, UNC51, Unc51., Unc51.1, unc-51 like autophagy activating kinase 1, unc-51 like kinase 1                                                                                                                                                                                                                                                                                                                                                                                                                                                                                                                                                                                                                                                                                                                                                                                                                                                                                                                                                                                                                                              |

Drugs  
Xenobiotics  
Antioxidants / Oxidants  
Chemopreventive agents

UV radiation  
ionizing radiation

Inflammatory cytokines  
Prostaglandins  
Growth factors  
Low density lipoproteins  
Bacterial and viral infection

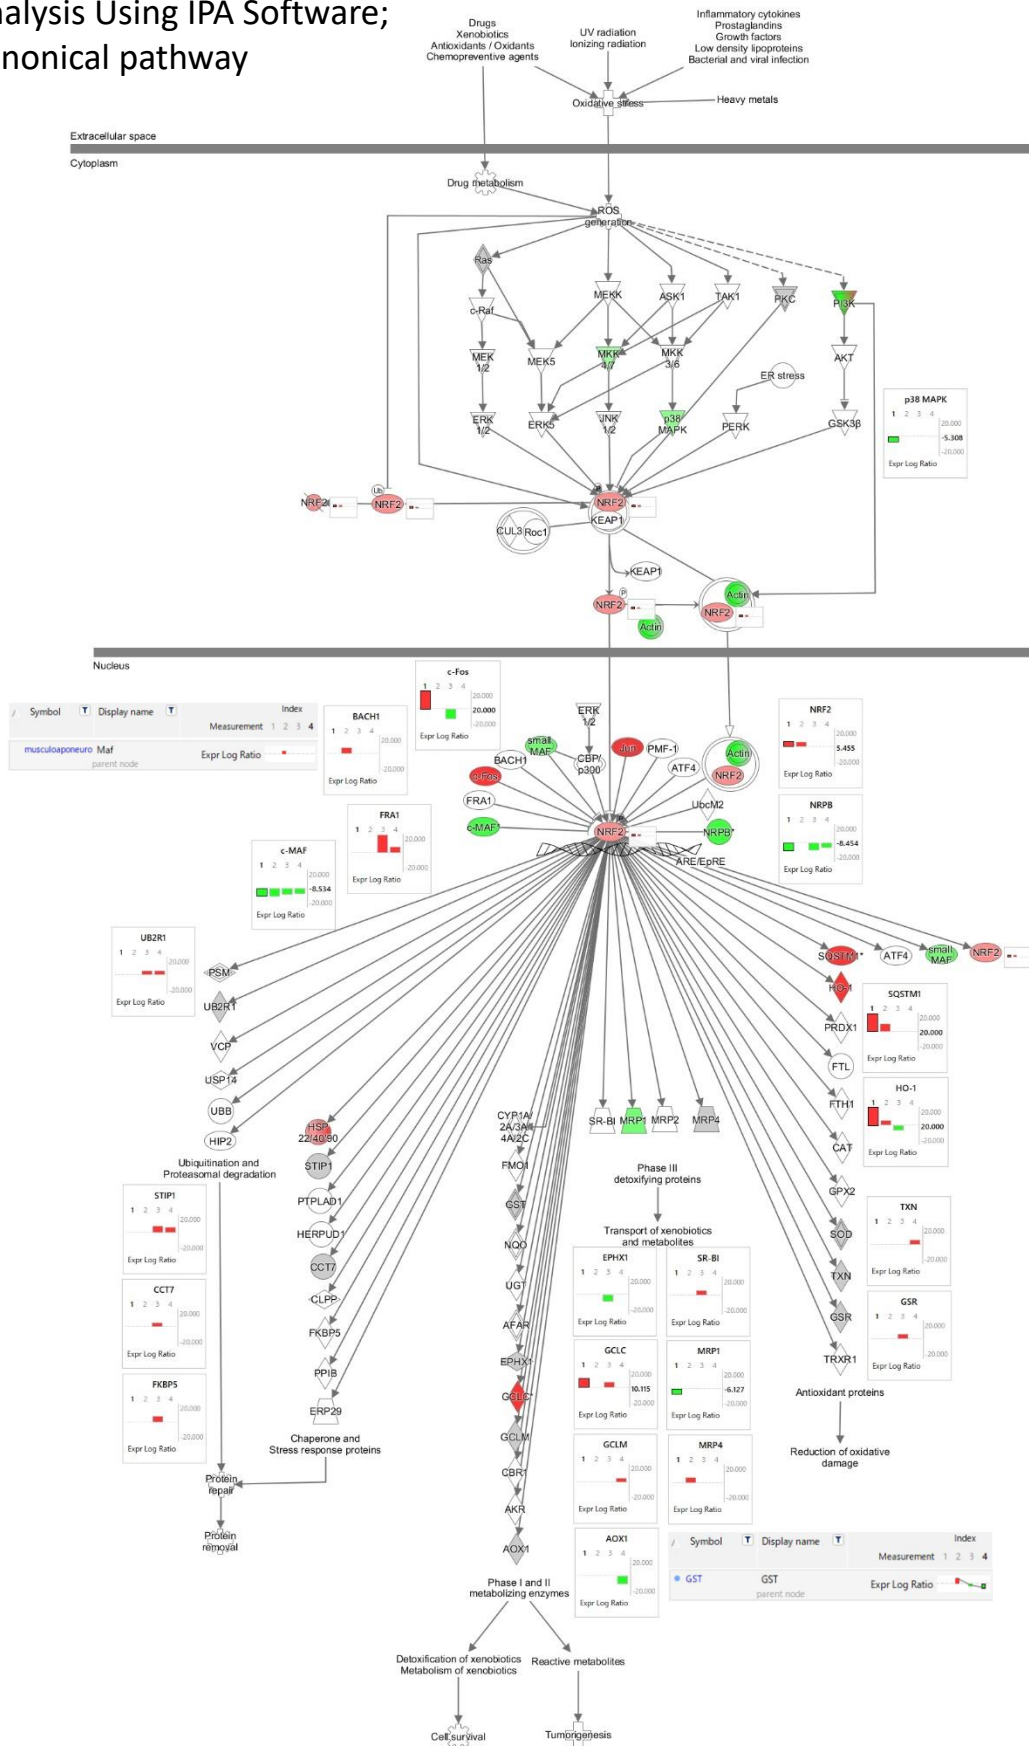

Figure S9. NRF2-mediated oxidative stress response  
1. 1 h; 2. 6 h; 3. 24 h; 4. 8 days.

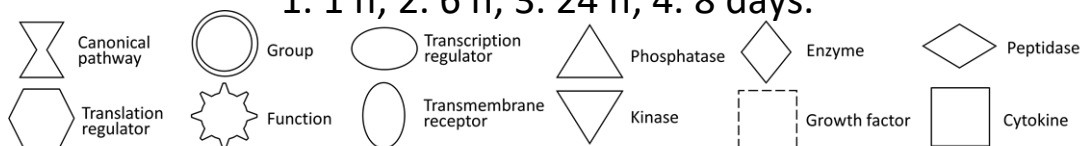

Red: Increased, FDR<0.05 versus solvent control

Green: Decreased, FDR<0.05 versus solvent control

| Symbol            | Synonym(s)                                                                                                                                                                                                                                                                                                                                                                                                                                                                                                                                                                                    |
|-------------------|-----------------------------------------------------------------------------------------------------------------------------------------------------------------------------------------------------------------------------------------------------------------------------------------------------------------------------------------------------------------------------------------------------------------------------------------------------------------------------------------------------------------------------------------------------------------------------------------------|
| ABCC1             | ABC29, ABCC, Abcc1b, ATP-binding cassette, sub-family C (CFTR/MRP), member 1, ATP binding cassette subfamily C member 1, Avcc1a, DFNA77, GS-X, LOC100362747, LOC100365034, M, Md, Mdrap, Mr, MRP, MRP1                                                                                                                                                                                                                                                                                                                                                                                        |
| ABCC2             | ABC30, A1173996, Atpase canalicular type, ATP-binding cassette, sub-family C (CFTR/MRP), member 2, ATP binding cassette subfamily C member 2, CANALICULAR MULTIDRUG RESISTANCE, Cmo, CMOAT, cMRP, DJS, Ebcr, Mr, mrp, MRP2                                                                                                                                                                                                                                                                                                                                                                    |
| ABCC4             | ABCC4-N1, ATP-binding cassette, sub-family C (CFTR/MRP), member 4, ATP binding cassette subfamily C member 4, D630049P08Rik, MOAT, MOAT-B, MR, MRP4, RGD1565953                                                                                                                                                                                                                                                                                                                                                                                                                               |
| Actin             | CLEC9A Ligand, G-actin                                                                                                                                                                                                                                                                                                                                                                                                                                                                                                                                                                        |
| AFAR              | AFLATOXIN B1 ALDEHYDE REDUCTASE                                                                                                                                                                                                                                                                                                                                                                                                                                                                                                                                                               |
| AKR1A1            | 2610201A18Rik, Ak, AKR1A4, ALDEHYDE REDUCTASE, aldo-keto reductase family 1 member A1, aldo-keto reductase family 1, member A1 (aldehyde reductase), ALDR1, ALR, ARM, DD3, HEL-S-6, hs.474584                                                                                                                                                                                                                                                                                                                                                                                                 |
| AKT1              | Ak, AKT, AKT serine/threonine kinase 1, LTR-akt, PK, PKB, PKB/A, PKB/Akt, PKB-ALPHA, PKB- $\alpha$ , PRKBA, Protein kinase B, RAC, RAC-ALPHA, RAC- $\alpha$ , Thymoma proto-oncogene 1, thymoma viral proto-oncogene 1                                                                                                                                                                                                                                                                                                                                                                        |
| AOX1              | A1196512, A1255253, ALDEHYDE OXIDASE, aldehyde oxidase 1, AO, AOH1, Aox, Aox-2, Moro, Ro, XD                                                                                                                                                                                                                                                                                                                                                                                                                                                                                                  |
| ATF4              | activating transcription factor 4, Atf-, C/AT, C/ATF, CREB, CREB-2, TAXREB, TAXREB67, TXREB                                                                                                                                                                                                                                                                                                                                                                                                                                                                                                   |
| BACH1             | 6230421P05Rik, A1323795, BTB and CNC Homology 1, BTB and CNC homology 1, basic leucine zipper transcription factor 1, BTBD24, BTB domain and CNC homolog 1, C21ORF41, LOC100911490                                                                                                                                                                                                                                                                                                                                                                                                            |
| CAT               | 2210418N07, ACATALASIA, Ca, Cas, Cas-1, Cat01, Catalase, Catalase1, Catl, Cs-, CS1                                                                                                                                                                                                                                                                                                                                                                                                                                                                                                            |
| CBP/p300          | CBP, CBP-p300                                                                                                                                                                                                                                                                                                                                                                                                                                                                                                                                                                                 |
| CBR1              | AW261796, C, Carbonyl Reductase, carbonyl reductase 1, carbonyl reductase [NADPH] 1-like, CBR, CR, CRN, hCBR1, inducible carbonyl reductase-like, LOC100360507, LOC100912203, LOC102556347, Ocr, PG-9-KR, SDR21C1                                                                                                                                                                                                                                                                                                                                                                             |
| CCT7              | AA408524, AL022769, CCTETA, CETH, Cctz, Chaperonin 7, chaperonin containing TCP1 subunit 7, chaperonin containing Tcp1, subunit 7 (eta), Chaperonin subunit 7, NIP7-1, TCP1ETA                                                                                                                                                                                                                                                                                                                                                                                                                |
| CDC34             | A1327276, cell division cycle 34, cell division cycle 34, ubiquitin conjugating enzyme, E2-CDC34, Serine Protease, UB2R1, UBC3, UBCH3, UBE2R, UBE2R1, Ubiquitin conjugating enzyme e2-32                                                                                                                                                                                                                                                                                                                                                                                                      |
| CLPP              | AU019820, caseolytic mitochondrial matrix peptidase proteolytic subunit, D17Wsu160, D17Wsu160e, DFNB81, PRLTS3                                                                                                                                                                                                                                                                                                                                                                                                                                                                                |
| CUL3              | cullin 3, KIAA0617, PHA2E                                                                                                                                                                                                                                                                                                                                                                                                                                                                                                                                                                     |
| Cul3-Roc1         | Cul3-Rbx1                                                                                                                                                                                                                                                                                                                                                                                                                                                                                                                                                                                     |
| EIF2AK3           | eukaryotic translation initiation factor 2 alpha kinase 3, eukaryotic translation initiation factor 2 $\alpha$ kinase 3, PE, PEK, PERK, WRS                                                                                                                                                                                                                                                                                                                                                                                                                                                   |
| ENC1              | CCL28, ECTODERMAL-NEURAL CORTEX1, KLHL35, KLHL37, N, NRPB, PIG, PIG10, TP53110                                                                                                                                                                                                                                                                                                                                                                                                                                                                                                                |
| EPXH1             | EH, Ehm, Eph-, Eph-1, EPHX, EPOX, Epoxide Hydrolase, epoxide hydrolase 1, epoxide hydrolase 1, microsomal, EPXH1, HYL1, MEH, MEH8, Microsomal Colinesterase, MICROSOMAL EPOXIDE HYDROLASE                                                                                                                                                                                                                                                                                                                                                                                                     |
| ERK1/2            | MAPK p44/42, MAPK p44/p42, p42/44 mapk, P42/p44 erk, P42/p44 mapk, p42/p44 MAP KINASE                                                                                                                                                                                                                                                                                                                                                                                                                                                                                                         |
| ERP29             | 1200015M03Rik, 2810446M09Rik, AW209030, C12orf8, endoplasmic reticulum protein 29, Erp, ERp28, ERp31, HEL-S-107, PDI-, PDIA9, PDI-DB                                                                                                                                                                                                                                                                                                                                                                                                                                                          |
| FKBP5             | A1G6, D17Ert592, D17Ert592e, Dit, Dit1, FK506 binding protein 5, FKBP51, FKBP54, FKBP prolyl isomerase 5, P54, PPIase, Ptg-10                                                                                                                                                                                                                                                                                                                                                                                                                                                                 |
| FMO1              | flavin containing dimethylalanine monooxygenase 1, Flavin-containing monooxygenase, flavin containing monooxygenase 1, RFMO1A                                                                                                                                                                                                                                                                                                                                                                                                                                                                 |
| FOS               | AP-1, c-, C-FOS, D12Rfj, D12Rfj1, FBj osteosarcoma oncogene, Fos proto-oncogene, AP-1 transcription factor subunit, p55                                                                                                                                                                                                                                                                                                                                                                                                                                                                       |
| FOSL1             | AW538199, FOS like 1, AP-1 transcription factor subunit, fos-like antigen 1, Fr, FRA, FRA1                                                                                                                                                                                                                                                                                                                                                                                                                                                                                                    |
| FTH1              | APOFERRITIN H CHAIN, Ferritin heavy chain, ferritin heavy chain 1, ferritin heavy polypeptide 1, Ferritin subunit H, FHC, Frh, FTH, FTHL6, HFE5, H-fer, H-ferritin, HfT, hypothetical protein LOC689130, LOC689130, MFH, PIG15, PLIF                                                                                                                                                                                                                                                                                                                                                          |
| FTL               | Ferritin, FERRITIN LIGHT CHAIN, ferritin light chain 1, ferritin light chain 1-like, ferritin light chain 1-like 1, ferritin light chain 2, ferritin light polypeptide 1, ferritin light polypeptide, pseudogene 2, FL, FRIL, Fril1, Ft, FTL1, Ft111, Ft11-ps2, Ft1-ps, Gm20746, L-fe, L-ferritin, LFTD, LOC100359668, LOC100360087, LOC100362384, LOC100363177, NBIA3, RGD1560687, RGD1561055, RGD1566189, similar to ferritin light chain, similar to Ferritin light chain (Ferritin L subunit), YB24D08                                                                                    |
| GCLC              | D9Wsu168, D9Wsu168e, gamma GCS HEAVY CHAIN, Gamma Glutamylcysteine Synthetase, Gamma glutamylcysteine synthetase heavy subunit, Gamma Glutamyl Cysteine Synthetase Light Subunit, GCL, GCS, GCS, Catalytic, GCS-HS, Ggcs-hs, Glc, GLCL, GLCLC, GLCL-H, glutamate-cysteine ligase catalytic subunit, Glutamate-Cysteine Ligase, Catalytic Subunit, $\gamma$ Gcs, $\gamma$ -Gcsh, $\gamma$ GCS HEAVY CHAIN, $\gamma$ Glutamylcysteine Synthetase, $\gamma$ Glutamylcysteine synthetase heavy subunit, $\gamma$ Glutamyl Cysteine Synthetase Light Subunit                                       |
| GCLM              | A1649393, Gamma gclm, gamma GCS LIGHT CHAIN, Gamma glutamylcysteine synthetase (regulatory), gamma GLUTAMLYCYSTEINE SYNTHETASE, gamma-glutamylcysteine synthetase light (regulatory) subunit, Gcmc, Gcs-ls, Gcs, Regulatory, Gl, GLCLR, glutamat-cystein ligase, regulatory subunit, glutamate-cysteine ligase modifier subunit, Glutamate-Cysteine Ligase, Modifier Subunit, $\gamma$ gclm, $\gamma$ -GCS, $\gamma$ GCS LIGHT CHAIN, $\gamma$ glutamylcysteine synthase (regulatory), $\gamma$ GLUTAMLYCYSTEINE SYNTHETASE, $\gamma$ -glutamylcysteine synthetase light (regulatory) subunit |
| GPX2              | GL-G, GLGPx, glutathione peroxidase 2, GPRP, GRP-2, GPx-, GPX-GI, GSHPx-2, GSHPx-GI                                                                                                                                                                                                                                                                                                                                                                                                                                                                                                           |
| GSK3B             | 7330414F15Rik, 8430431H08Rik, C86142, glycogen synthase kinase 3 beta, glycogen synthase kinase 3 $\beta$ , GSK-, GSK-3, GSK-3be, GSK-3beta, GSK-3 $\beta$ , GSKbeta, GSK $\beta$ , Tpk1                                                                                                                                                                                                                                                                                                                                                                                                      |
| GSR               | A1325518, D8Ert238, D8Ert238e, glutathione-disulfide reductase, Glutathione reductase, GR, Gr-1, Gred, GRX, GSRD, HEL-75, HEL-S-122m                                                                                                                                                                                                                                                                                                                                                                                                                                                          |
| GST               | Glutathione s-transferase, GSH Transferase                                                                                                                                                                                                                                                                                                                                                                                                                                                                                                                                                    |
| HACD3             | 3-hydroxyacyl-CoA dehydratase 3, 4930523M17Rik, AW742319, B-in, B-IND1, Butyrate induced transcript 1, Hcad3, Hscp1, HSPC121, Ptp, PTPLAD1, RGD1565496                                                                                                                                                                                                                                                                                                                                                                                                                                        |
| HERPUD1           | He, HERP, HERPUD, homocysteine-inducible, endoplasmic reticulum stress-inducible, ubiquitin-like domain member 1, homocysteine inducible ER protein with ubiquitin like domain 1, Mi, Mif1, Mifl, SUP                                                                                                                                                                                                                                                                                                                                                                                         |
| HMOX1             | bK286B10, D8Wsu38, D8Wsu38e, haemox, HEME OXYGENASE, Heme oxygenase 1, HEME OXYGENASE (DECYCLIZING) 1, Hemox, Heox, HEOXG, Hmo, Hmox, HMOX1D, HO-, HO-1, Hsp, HSP32                                                                                                                                                                                                                                                                                                                                                                                                                           |
| Hsp22/Hsp40/Hsp90 | HSP 22/40/90                                                                                                                                                                                                                                                                                                                                                                                                                                                                                                                                                                                  |
| JINK1/2           | JNK1/2, JNK p54                                                                                                                                                                                                                                                                                                                                                                                                                                                                                                                                                                               |
| Jun               | AP-1, JUN, Jun dim                                                                                                                                                                                                                                                                                                                                                                                                                                                                                                                                                                            |
| KEAP1             | IN, INRF2, Kelch Like ECH-Associated Protein 1, KLHL19, mKIAA0132                                                                                                                                                                                                                                                                                                                                                                                                                                                                                                                             |
| Keap1-Nrf2        | Keap1-Nfe2l2                                                                                                                                                                                                                                                                                                                                                                                                                                                                                                                                                                                  |
| Ma1               | MAF, SMALL MAF                                                                                                                                                                                                                                                                                                                                                                                                                                                                                                                                                                                |
| MAF               | 2810401A20Rik, A230108G15Rik, avian musculoaponeurotic fibrosarcoma oncogene homolog, AW047063, AYGRP, CCA4, c-ma, c-MAF, CTCT21, Maf2, MAF bZIP transcription factor, V-MAF MUSCULOAPONEUROTIC FIBROSARCOMA ONCOGENE HOMOLOG                                                                                                                                                                                                                                                                                                                                                                 |
| MAP2K1/2          | MEK1/2, MKK1/2                                                                                                                                                                                                                                                                                                                                                                                                                                                                                                                                                                                |
| MAP2K4/7          | Jnkk, MEK 4/7, MKK 4/7                                                                                                                                                                                                                                                                                                                                                                                                                                                                                                                                                                        |
| MAP2K5            | A1324775, A1248457, Hst17454, MAP kinase kinase 5, MAPKK5, MEK5, mitogen-activated protein kinase kinase 5, MKK5, PRKMK5                                                                                                                                                                                                                                                                                                                                                                                                                                                                      |
| MAP3K1            | LOC100912399, MAPK, MAPKKK1, MEKK, MEKK 1, MEK KINASE, MEK KINASE 1, mitogen-activated protein kinase kinase kinase 1, mitogen-activated protein kinase kinase kinase 1-like, Raf, SRXY6                                                                                                                                                                                                                                                                                                                                                                                                      |
| MAP3K5            | 7420452D20Rik, A, APOPTOSIS SIGNAL REGULATED KINASE 1, AS, ASK, ASK1, M3K5, MAPKKK5, MEKK5, mitogen-activated protein kinase kinase kinase 5, RGD1306565                                                                                                                                                                                                                                                                                                                                                                                                                                      |
| MAP3K7            | CSCF, FMD2, Map3k7 predicted, MEKK7, mitogen-activated protein kinase kinase kinase 7, TAK1, TGF1a, tgf $\beta$ activated kinase 1                                                                                                                                                                                                                                                                                                                                                                                                                                                            |
| MAPK14            | Crk, CRK1, CSB, CSBP, CSBP1, CSBP2, CSPB1, EXP, Hog, LOC101929346, MAPK p38, mitogen-activated protein kinase 14, Mxi, Mxi2, p3, p38-, p38a, p38ALPHA, p38Hog, p38 kinase, p38M, p38 MAPK, p38 Map Kinase, p38 MAP kinases alpha and beta, p38 MAP kinases $\alpha$ and $\beta$ , p38 MAPK- $\alpha$ , p38- $\alpha$ , PRKM14, PRKM15, RK, SAPK2A, SAPK p38 alpha, SAPK p38 $\alpha$                                                                                                                                                                                                          |
| MAPK7             | b2b2346C, b2b2346Clo, BMK-1, ERK, ERK4, ERK-5, Erks-T, ERK7, FRK, LOC100912585, mitogen-activated protein kinase 7, mitogen-activated protein kinase 7-like, PRKM7                                                                                                                                                                                                                                                                                                                                                                                                                            |
| Mkk3/6            | MEK3/6, Mkk3/6 (mitogen activated protein kinase kinase 3/6), MKK3/MKK6                                                                                                                                                                                                                                                                                                                                                                                                                                                                                                                       |
| NFE2L2            | BM974200, HEBP1, IMDHH, Nr, Nrf2, nuclear factor, erythroid 2-like 2, nuclear factor, erythroid derived 2, like 2                                                                                                                                                                                                                                                                                                                                                                                                                                                                             |
| NGO               | Nadph-d, NADPH QUINONE OXIDOREDUCTASE                                                                                                                                                                                                                                                                                                                                                                                                                                                                                                                                                         |
| PI3K              | 1-phosphatidylinositol 3-kinase, 2.7.1.137, ATP:1-phosphatidyl-1D-myo-inositol 3-phosphotransferase, Phosphatidylinositol 3 kinase, phosphatidylinositol 3'-kinase, PI3-kinase, PtdIns 3 Kinase, type III phosphoinositide 3-kinase, type I phosphatidylinositol kinase, Vps34p                                                                                                                                                                                                                                                                                                               |
| PKC               | Cnpkc, PKC, Pkc(s), Protein Kinase C                                                                                                                                                                                                                                                                                                                                                                                                                                                                                                                                                          |
| PMF1              | 2600009M07Rik, AL033286, AW060657, LOC886408, PMF-1, PMF1-BGLAP, PMF1-BGLAP readthrough, polyamine-modulated factor 1                                                                                                                                                                                                                                                                                                                                                                                                                                                                         |
| PPIB              | AA408962, AA553318, A1B44835, Cph, Cphn, Cphn-2, CyP-20, CyP-20b, CYPB, CYP-S1, HEL-S-39, O19, peptidylprolyl isomerase B, SCYLP                                                                                                                                                                                                                                                                                                                                                                                                                                                              |
| PRDX1             | ENHANCER, Hbp23, MSP, MSP23, NKEF-A, OSF, OSF-3, P, PAG, PAGA, PAGB, PEROXYREDOXIN 1, peroxiredoxin 1-like 1, PEROXYREDOXIN 1, pr, Prdx111, Prdx1, PRX1, PRXJ, Tdpx, TDPX2, TDX2, TPxA                                                                                                                                                                                                                                                                                                                                                                                                        |
| PSM               | PROTEASOME SUBUNIT5                                                                                                                                                                                                                                                                                                                                                                                                                                                                                                                                                                           |
| RAF1              | 6430402F14Rik, AA990557, BB129353, CMD1NN, c-R, Cra, CRAF, Cra1, D830050J10Rik, leukaemia ONCOGENE HOMOLOG1, LEUKEMIA ONCOGENE HOMOLOG1, NS5, Raf-1 proto-oncogene, serine/threonine kinase, v-, v-Raf, v-raf-leukaemia viral oncogene 1, v-raf-leukemia viral oncogene 1                                                                                                                                                                                                                                                                                                                     |
| RBX1              | 1500002P15Rik, AA517855, BA554C12.1, Gm9840, LOC100046417, Rbx1-ps, ring-box 1, ring-box 1, pseudogene, RNF75, RO, ROC1                                                                                                                                                                                                                                                                                                                                                                                                                                                                       |
| SCARB1            | A1120173, CD36, CD36L1, Chohd, Chohd1, Cla, CLA-1, D5Ert460, D5Ert460e, Hdq, Hdq1, HDLQTL6, HDL Receptor, Hlb39, Hlb398, mSR-B1, S, SCAVENGER receptor B1, Scavenger receptor class b1, scavenger receptor class B member 1, scavenger receptor class B, member 1, Sr, SR-B, SR-B1, SR-BI                                                                                                                                                                                                                                                                                                     |
| SLC35A2           | A1327289, CDG2M, CDGX Had-, Had-1, Sfc, Sfc8, solute carrier family 35 member A2, UDP-Gal-Tr, Uga, UGALT, UGAT, UGT, UGT1, UGT2, UGTL                                                                                                                                                                                                                                                                                                                                                                                                                                                         |
| SOD               | 1.15.1.1, copper-zinc superoxide dismutase, cuprein, Cu,Zn-SOD, Cu-Zn superoxide dismutase, cytocuprein, erythrocuprein, ferrisuperoxide dismutase, Fe-SOD, haemocuprein, hemocuprein, hepatocuprein, Mn-SOD, Mn zinc sod, SOD-1, SOD-2, SOD-3, SOD-4, SODF, SODS, superoxidase dismutase, superoxide dismutase, superoxide dismutase I, superoxide dismutase II, superoxide:superoxide oxidoreductase                                                                                                                                                                                        |
| SQSTM1            | A17, A170, AC008393.2, DMRV, FTALDS3, NADGP, OSF, OSF-6, Osi, OSIL, Osp, Oxidative Stress, p6, p60, p62, p62B, PDB3, Pkc zeta interacting, Pkc $\zeta$ interacting, S, sequestosome 1, STAP, STONE14, Ubiquitin-binding protein a, ZIP, ZIP3                                                                                                                                                                                                                                                                                                                                                  |
| STIP1             | H, HEL-S-94n, HOP, IEF-SSP-3521, p6, P60, SIP1, ST, STI1, STI1L, Stress-induced phosphoprotein 1                                                                                                                                                                                                                                                                                                                                                                                                                                                                                              |
| TXN               | ADF, AW550880, EOSINOPHIL CYTOTOXICITY FACTOR, thioredoxin, Thioredoxin-1, TRDX, TRX, TRX1, Txn1                                                                                                                                                                                                                                                                                                                                                                                                                                                                                              |
| TXNRD1            | GRIM-12, KM 102 DERIVED REDUCTASE LIKE FACTOR, T, Tgr, Thioredoxin reductase, thioredoxin reductase 1, TR, TR1, Trx, TRXR1, TXNR                                                                                                                                                                                                                                                                                                                                                                                                                                                              |
| UBB               | AL033289, HEL-S-50, RPS27A, UBA52, Ubb2, UBC, UBIQUITIN, UBIQUITIN B                                                                                                                                                                                                                                                                                                                                                                                                                                                                                                                          |
| UBE2E3            | Ubc4-1, Ubc4, UBCH9, UbcM2, ubiquitin-conjugating enzyme E2E 3                                                                                                                                                                                                                                                                                                                                                                                                                                                                                                                                |
| UBE2K             | AW492011, D5Ert601, D5Ert601e, E2-25K, Hi, HIP-2, HYPG, LIG, UBC1, UBIQUITIN CARRIER, ubiquitin-conjugating enzyme E2K                                                                                                                                                                                                                                                                                                                                                                                                                                                                        |
| USP14             | 2610000K12Rik, 2610037B11Rik, a, at, AW107924, ax, C78769, NMF37, nmf375, TGT, ubiquitin specific peptidase 14, Ubiquitin specific protease 14                                                                                                                                                                                                                                                                                                                                                                                                                                                |
| VCP               | 3110001E05, CDC48, FTDALS6, IBMPFD, p9, p97, p97, p97/VCP, TERA, Ter atpase, Transitional Endoplasmic Reticulum Atpase, valosin-containing protein, XSG7                                                                                                                                                                                                                                                                                                                                                                                                                                      |



# Pathway Analysis Using IPA Software; canonical pathway

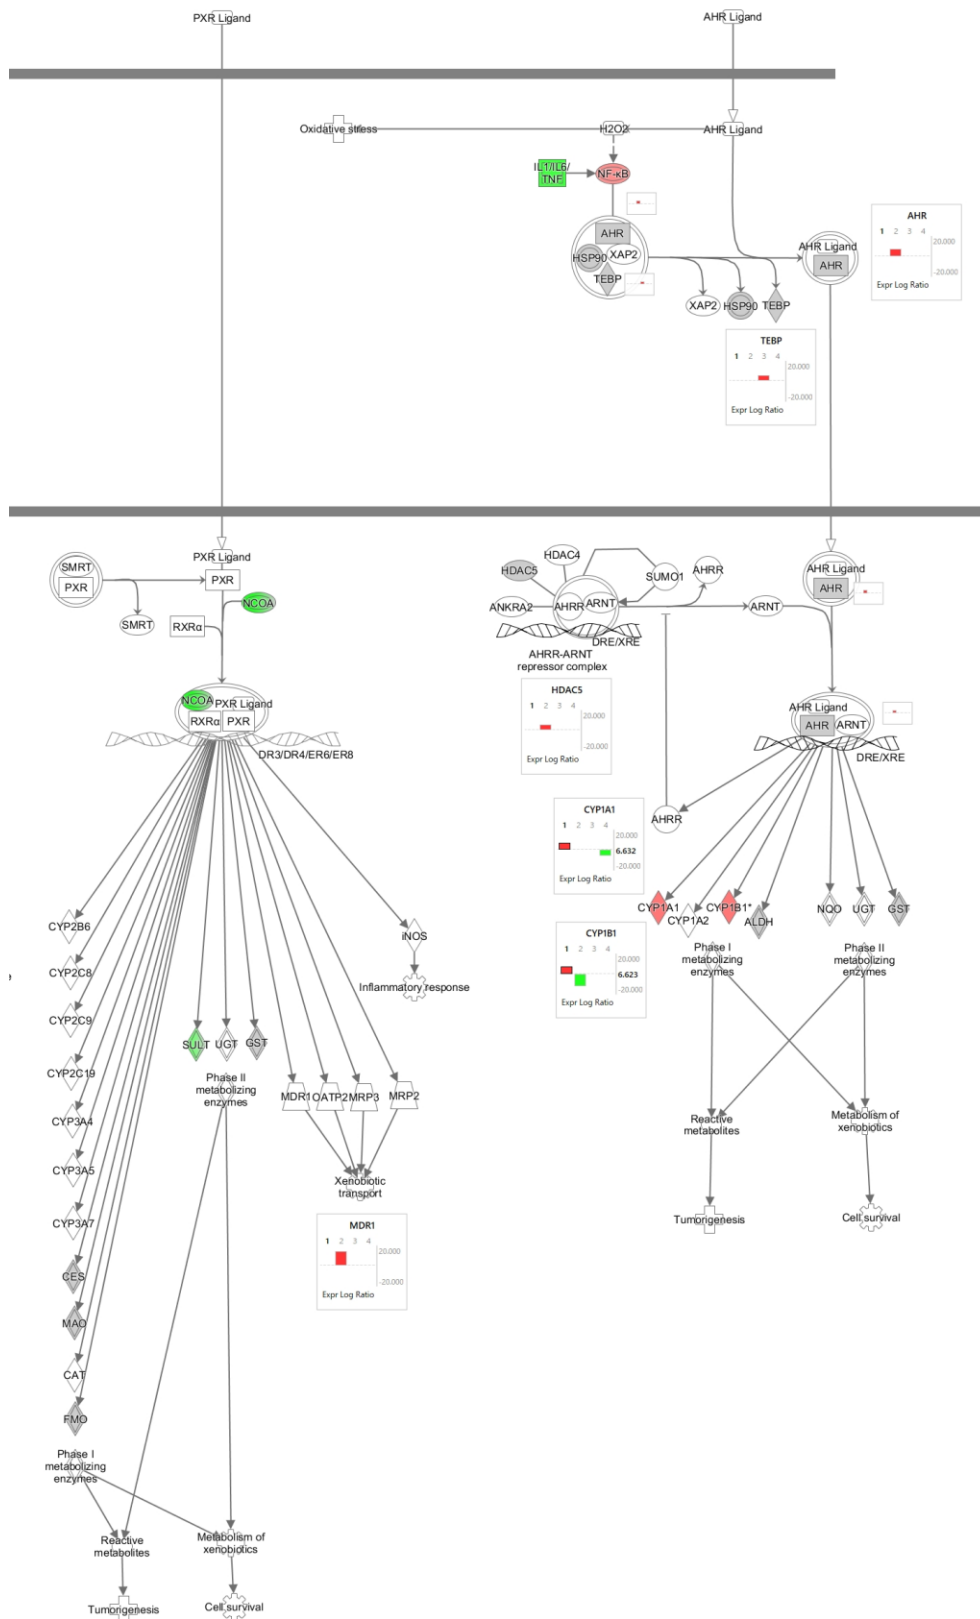

Figure S10. Xenobiotic Metabolism Signaling

1. 1 h; 2. 6 h; 3. 24 h; 4. 8 days.

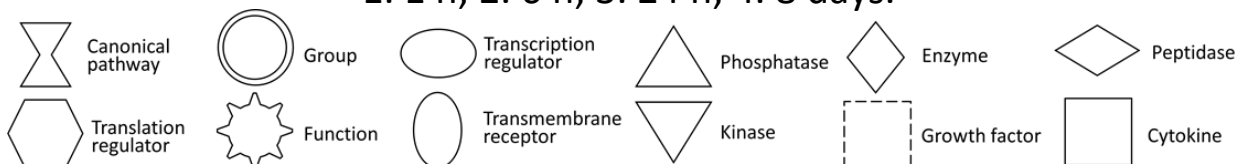

Red: Increased, FDR<0.05 versus solvent control

Green: Decreased, FDR<0.05 versus solvent control

# Pathway Analysis Using IPA Software; canonical pathway

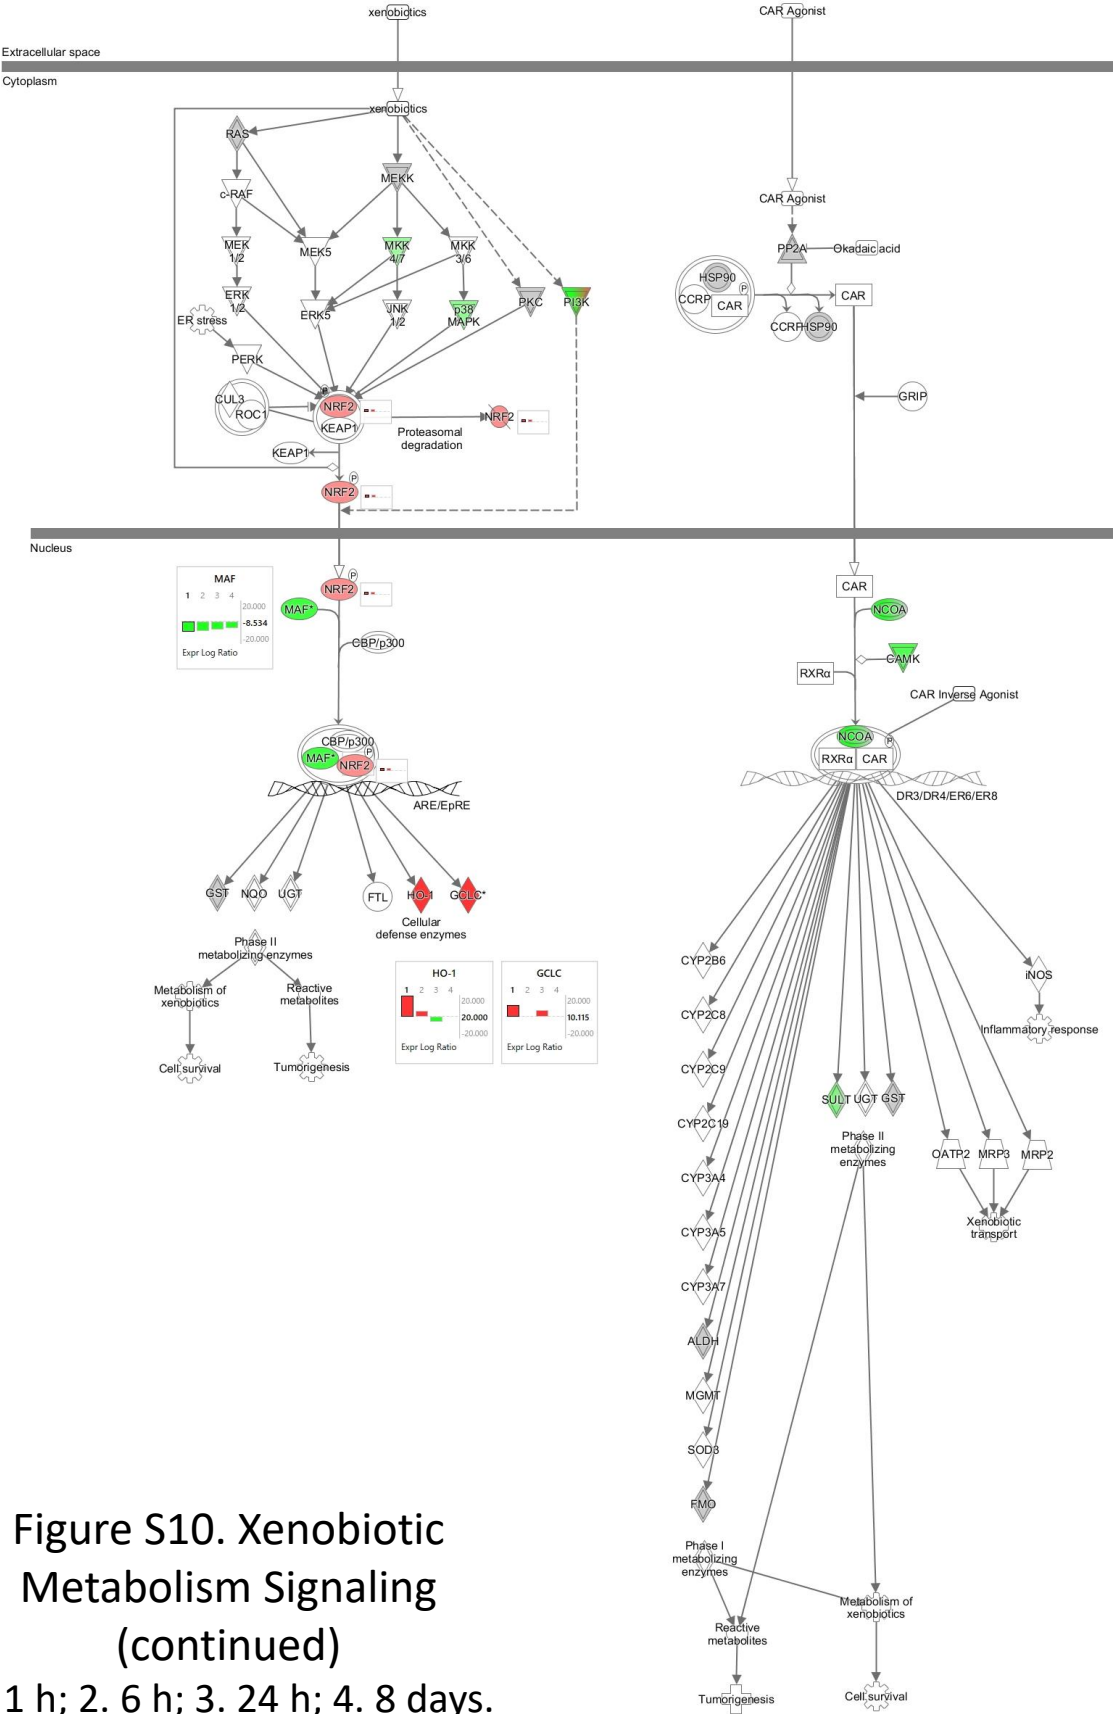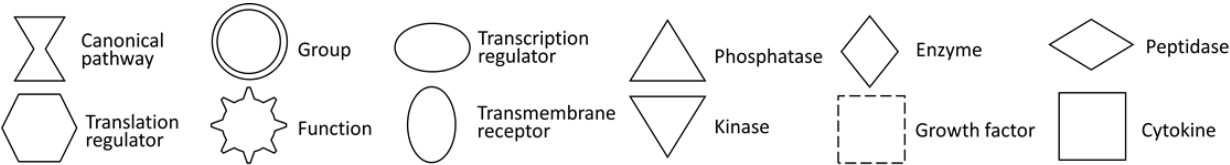

Red: Increased, FDR<0.05 versus solvent control

Green: Decreased, FDR<0.05 versus solvent control

| Symbol                    | Synonym(s)                                                                                                                                                                                                                                                                                                                                                                                                                                                                                                                                                                                                                                               |
|---------------------------|----------------------------------------------------------------------------------------------------------------------------------------------------------------------------------------------------------------------------------------------------------------------------------------------------------------------------------------------------------------------------------------------------------------------------------------------------------------------------------------------------------------------------------------------------------------------------------------------------------------------------------------------------------|
| ABCB1                     | ABCB20, Abcb1a, Abcb4, ATP-binding cassette, sub-family B (MDR/TAP), member 1A, ATP binding cassette subfamily B member 1A, CD243, CLCS, Ev, Ev32, GP170, Mdr, MDR1, Mdr1a, Mdr3, P-, p-170, P-GLYCOPROTEIN, P-GP, Pgy-, PGY1, Pgy-3                                                                                                                                                                                                                                                                                                                                                                                                                     |
| ABCC2                     | ABC30, A1173996, ATPase ancalcular type, ATP-binding cassette, sub-family C (CFTR/MRP), member 2, ATP binding cassette subfamily C member 2, CANALICULAR MULTIDRUG RESISTANCE, Cmo, CMOAT, cMRP, DJS, Ebcr, Mr, mmp, MRP2                                                                                                                                                                                                                                                                                                                                                                                                                                |
| ABCC3                     | 1700019L09Rik, ABC31, ATP-binding cassette C3, ATP-binding cassette, sub-family C (CFTR/MRP), member 3, ATP binding cassette subfamily C member 3, cMOAT2, EST90757, MLP2, MOAT-D, MR, MRP3, Multidrug Resistant Protein 3                                                                                                                                                                                                                                                                                                                                                                                                                               |
| AHR                       | A, Ah, Ahh, Ahre, AH receptor, aryl-hydrocarbon receptor, bHLHe77, bHLHe76, DIOXIN receptor, In, RP85                                                                                                                                                                                                                                                                                                                                                                                                                                                                                                                                                    |
| AHR Ligand                | AHR ligand, aromatic hydrocarbon                                                                                                                                                                                                                                                                                                                                                                                                                                                                                                                                                                                                                         |
| AHRR                      | AHH, AHRR, aryl-hydrocarbon receptor repressor, bHLHe77, mKIAA1234                                                                                                                                                                                                                                                                                                                                                                                                                                                                                                                                                                                       |
| AIP                       | A, AA408703, ARA9, aryl-hydrocarbon receptor-interacting protein, AW476050, D19Bwg1412e, Fkbp1, FKBP16, FKBP37, PITA1, SMTPHN, Xa, XAP-2                                                                                                                                                                                                                                                                                                                                                                                                                                                                                                                 |
| ALDH                      | ALDEHYDE DEHYDROGENASE                                                                                                                                                                                                                                                                                                                                                                                                                                                                                                                                                                                                                                   |
| ANKRA2                    | 1110004M18Rik, ANKRA, ankryrin repeat family A member 2, ankryrin repeat, family A (RFXANK-like), 2                                                                                                                                                                                                                                                                                                                                                                                                                                                                                                                                                      |
| ARNT                      | Arnt1, aryl hydrocarbon receptor nuclear translocator, bHLHe, bHLHe2, D3Ertdd557, D3Ertdd557e, DIOXIN receptor, Dmt, ESTM4, ESTM42, Hif1, HIF1B, HIF1BETA, HIF-1-β, HIF beta, HIF β, mKIAA4051, TANGO, W08714                                                                                                                                                                                                                                                                                                                                                                                                                                            |
| CAMK                      | Ca2+/calmodulin-dependent protein kinase, Calmodulin Kinase                                                                                                                                                                                                                                                                                                                                                                                                                                                                                                                                                                                              |
| CAR Agonist               | steroids                                                                                                                                                                                                                                                                                                                                                                                                                                                                                                                                                                                                                                                 |
| CAT                       | 2210418N07, ACATALASIA, Ca, Cas, Cas-1, Cat01, Catalase, Catalase1, Call, Cs-, CS1                                                                                                                                                                                                                                                                                                                                                                                                                                                                                                                                                                       |
| CBP/p300                  | CBP, CBP-p300                                                                                                                                                                                                                                                                                                                                                                                                                                                                                                                                                                                                                                            |
| CES                       | 3.1.1.1, all-esterase, alpha-carboxylesterase, B-esterase, BUTYRATE ESTERASE, butyryl esterase, Carboxyesterase, carboxylate esterase, CARBOXYLESTERASE, carboxylic acid esterase, carboxylic esterase, CE, cocaine esterase, esterase A, esterase B, esterase D, methylbutyrase, methylbutyrate esterase, monobutyrase, nonspecific carboxylesterase, NSE, procaine esterase, propionyl esterase, serine esterase, triacetin esterase, vitamin A esterase, α-carboxylesterase                                                                                                                                                                           |
| CUL3                      | culin 3, KIAA0617, PHA2E                                                                                                                                                                                                                                                                                                                                                                                                                                                                                                                                                                                                                                 |
| Cul3-Rbx1                 | Cul3-Rbx1                                                                                                                                                                                                                                                                                                                                                                                                                                                                                                                                                                                                                                                |
| CYP1A1                    | AHH, AH Hydroxylase, AHRR, CP11, CYP1, Cyp45c, Cypc45c, CYP1A1, cytochrome P450 family 1 subfamily A member 1, cytochrome P450, family 1, subfamily a, polypeptide 1, ER0D, P1-450, P450-, P450-1, P-450bH-b, P450-C, P450DX, P450 IA1, P-450MC, P450-P1                                                                                                                                                                                                                                                                                                                                                                                                 |
| CYP1A2                    | CP1, CP12, CYPD45, CYP1A2, cytochrome P450 family 1 subfamily A member 2, cytochrome P450, family 1, subfamily a, polypeptide 2, P3-450, P450-, P450-3, P-450d, P450 IA2, P-450Is-f, P450-P3, P450(PA), RATCYPD45                                                                                                                                                                                                                                                                                                                                                                                                                                        |
| CYP1B1                    | ASGD6, CP1B, CYP1B1, cytochrome P450 family 1 subfamily B member 1, cytochrome P450, family 1, subfamily b, polypeptide 1, GLC3A, P4501B1, P450Rap                                                                                                                                                                                                                                                                                                                                                                                                                                                                                                       |
| CYP2B6                    | CPB6, Cyp2, CYP2B, CYP2B1, Cyp2b10, CYP2B2, Cyp2b20, Cyp2b20/10, CYP2B3, Cyp2b6/7, CYP2B7, CYP2B7P, Cyp450e, Cypbe, Cype, CYP1B2, CYP1B3, CYP1B6, cytochrome P450, 2b19, cytochrome P450 family 2 subfamily B member 6, cytochrome P450, family 2, subfamily b, polypeptide 1, cytochrome P450, family 2, subfamily b, polypeptide 10, cytochrome P450, family 2, subfamily b, polypeptide 2, EFVM, IIB1, LOC361523, p1, p16, P450, P450Ib1                                                                                                                                                                                                              |
| CYP2C19                   | CPCJ, CYP2C, Cyp2c6, Cyp2c6v1, CYP450-2C, CYP1IC17, CYP1IC19, CYP1IC6, cytochrome P450 family 2 subfamily C member 19, cytochrome P450, family 2, subfamily C, polypeptide 6, variant 1, P450-11A, P450C2C, P450IIC19, PB1, PTF2                                                                                                                                                                                                                                                                                                                                                                                                                         |
| CYP2C8                    | AH, Ah-2, Ahh-, Ahh-1, AHO, AHOH, AHOHase, A1159681, A1196010, CPC8, Cyp2, Cyp2c, Cyp2c29, Cyp2c38, Cyp2c39, Cyp2c7, CYP2C8DM, Cyp2c9, CYP1IC39, CYP1IC8, Cytochrome p450, cytochrome P450 family 2 subfamily C member 8, cytochrome P450, family 2, subfamily c, polypeptide 29, cytochrome P450, family 2, subfamily c, polypeptide 38, cytochrome P450, family 2, subfamily c, polypeptide 39, cytochrome P450, family 2, subfamily c, polypeptide 7, LOC100361347, LOC100911552, LOC639008, MP-12/MP-20, P450-2, P450-2C                                                                                                                             |
| CYP2C9                    | 2010301M18Rik, 2210009K14Rik, CPC9, CYP2C, CYP2C10, Cyp2c11, Cyp2c111, Cyp2c4, Cyp2c65, Cyp2c66, CYP2CII, CYP1IC9, cytochrome P450 family 2 subfamily C member 9, cytochrome P450, family 2, subfamily c, polypeptide 65, cytochrome P450, family 2, subfamily c, polypeptide 66, cytochrome P450, subfamily 2, polypeptide 11, Hexobarbital hydroxylase, LOC100911826, p450 2c29, P4502C9, P450IIC9, Progesterone 2alpha hydroxylase, RGD: 632285                                                                                                                                                                                                       |
| CYP3A4                    | CP33, CP34, CYP3A, Cyp3a11, Cyp3a2, CYP3A23, CYP3A3, CYP3IIA3, CYP3IIIA4, CYTOCHROME P450 3A3, cytochrome P450 family 3 subfamily A member 4, cytochrome P450, family 3, subfamily a, polypeptide 2, HLP, NF-25, P450C3, P450PCN1, P-450ut-a, VDDR3                                                                                                                                                                                                                                                                                                                                                                                                      |
| CYP3A5                    | A1256190, cDEX, CP35, CYP, Cyp3a, Cyp3a1, Cyp3a11, Cyp3a16, Cyp3a2, Cyp3a23, Cyp3a23-3a1, Cyp3a3, Cyp3a4, Cyp3a41, Cyp3a41a, Cyp3a41b, Cyp3a44, CYP3IA5, cytochrome P450 3A1-like, cytochrome P450 family 3 subfamily A member 5, cytochrome P450, family 3, subfamily a, polypeptide 11, cytochrome P450, family 3, subfamily a, polypeptide 16, cytochrome P450, family 3, subfamily a, polypeptide 23-polypeptide 1, cytochrome P450, family 3, subfamily a, polypeptide 41A, cytochrome P450, family 3, subfamily a, polypeptide 41B, cytochrome P450, family 3, subfamily a, polypeptide 44, II, IIIAm1, LOC100910877, P, P450PCN3, Pcn, PCN3, RL33 |
| CYP3A7                    | CP37, Cyp3a13, CYP3A6, Cyp3a9, CYP3IIA7, Cytochrome p450 3A9, cytochrome P450 family 3 subfamily A member 7, cytochrome P450, family 3, subfamily a, polypeptide 13, cytochrome P450, family 3, subfamily a, polypeptide 9, II, IIIAm2, P-450111A7, P-450(HFL33), P450-HFLA, P450HLP2, P450IIF3                                                                                                                                                                                                                                                                                                                                                          |
| DNAJC7                    | 2010003F24Rik, 2010004G07Rik, CCRP, DJ11, DJC7, DnaJ heat shock protein family (Hsp40) member C7, mD111, mTp, mTp2, TPR2, TTC2                                                                                                                                                                                                                                                                                                                                                                                                                                                                                                                           |
| E1F2AK3                   | eukaryotic translation initiation factor 2 alpha kinase 3, eukaryotic translation initiation factor 2 α kinase 3, PE, PEK, PERK, WRS                                                                                                                                                                                                                                                                                                                                                                                                                                                                                                                     |
| ERK1/2                    | MAPK p44/42, MAPK p44/p42, p42/44 mapk, P42/p44 erk, P42/p44 mapk, p42/p44 MAP KINASE                                                                                                                                                                                                                                                                                                                                                                                                                                                                                                                                                                    |
| FMO                       | 1.14.13.8, dimethylaniline monooxygenase (N-oxide-forming), dimethylaniline N-oxidase, dimethylaniline oxidase, DMA oxidase, FAD-containing monooxygenase, FAD monooxygenase, flavin-containing monooxygenase, flavin monooxygenase, FMO-I, FMO-II, mixed-function amine oxidase, N,N-dimethylaniline monooxygenase, N,N-dimethylaniline,NADPH2:oxygen oxidoreductase (N-oxide-forming)                                                                                                                                                                                                                                                                  |
| FTL                       | Ferritin, FERRITIN LIGHT CHAIN, ferritin light chain 1, ferritin light chain 1-like, ferritin light chain 1-like, ferritin light chain 2, ferritin light polypeptide 1, ferritin light polypeptide, pseudogenes 2, FL, FRIL, Fri1, FT, FTL1, Fri11, Fri1-ps2, Fri-ps, Gm20746, L-fe, L-ferritin, LFTD, LOC100359668, LOC100360087, LOC100362384, LOC100363177, NBIA3, RGD1560687, RGD1561055, RGD156189, similar to ferritin light chain, similar to Ferritin light chain (Ferritin L subunit), YB24D08                                                                                                                                                  |
| GCLC                      | D9Wsu168, D9Wsu168e, gamma GCS HEAVY CHAIN, Gamma Glutamylcysteine Synthetase, Gamma glutamylcysteine synthetase heavy subunit, Gamma Glutamyl Cysteine Synthetase Light Subunit, GCL, GCS, GCS, Catalytic, GCS-HS, Gcgs-hs, Glc, GLCL, GLCLC, GLCL-H, glutamate-cysteine ligase catalytic subunit, Glutamate-Cysteine Ligase, Catalytic Subunit, γ Gcs, γ-Gcsh, γ GCS HEAVY CHAIN, γ Glutamylcysteine Synthetase, γ glutamylcysteine synthetase heavy subunit, γ Glutamyl Cysteine Synthetase Light Subunit                                                                                                                                             |
| GRIP1                     | 4931400F03Rik, eb, FRASRS3, glutamate receptor interacting protein 1, GRIP                                                                                                                                                                                                                                                                                                                                                                                                                                                                                                                                                                               |
| GST                       | Glutathione s-transferase, GSH Transferase                                                                                                                                                                                                                                                                                                                                                                                                                                                                                                                                                                                                               |
| H2O2                      | 7722-84-1, A-101, Colgate Peroxyl, Eskata, H2O2, hydrogen dioxide, hydrogen peroxide, peroxy mouthwash, urea hydrogen peroxide                                                                                                                                                                                                                                                                                                                                                                                                                                                                                                                           |
| HDAC4                     | 4932408F19, 4932408F19Rik, AHO3, BDMR, HA6116, HD4, HDAC-A, histone deacetylase 4                                                                                                                                                                                                                                                                                                                                                                                                                                                                                                                                                                        |
| HDAC5                     | A1426555, HD5, Hdac4, histone deacetylase 5, mHDA, mHDA1, mKIAA0600, NY-CO-9                                                                                                                                                                                                                                                                                                                                                                                                                                                                                                                                                                             |
| HMOX1                     | bK286B10, D8Wsu38, D8Wsu38e, haemox, HEME OXYGENASE, Heme oxygenase 1, HEME OXYGENASE (DECYCLIZING) 1, Hemox, Hexox, HEOXG, Hmo, Hmox, HMOXID, HO-, HO-1, Hsp, HSP32                                                                                                                                                                                                                                                                                                                                                                                                                                                                                     |
| HSP90                     | HSC90, Hsp84                                                                                                                                                                                                                                                                                                                                                                                                                                                                                                                                                                                                                                             |
| JNK1/2                    | JNK1/2, JNK p54                                                                                                                                                                                                                                                                                                                                                                                                                                                                                                                                                                                                                                          |
| KEAP1                     | IN, INRF2, Kelch Like ECH-Associated Protein 1, KLHL19, mKIAA0132                                                                                                                                                                                                                                                                                                                                                                                                                                                                                                                                                                                        |
| Keap1-Nrf2                | Keap1-Nfe2l2                                                                                                                                                                                                                                                                                                                                                                                                                                                                                                                                                                                                                                             |
| MAF                       | 2810401A20Rik, A230108G15RIK, avan musculoaponeurotic fibrosarcoma oncogene homolog, AW047063, AYGRP, CCA4, c-ma, c-MAF, CTRCT21, Maf2, MAF bZIP transcription factor, V-MAF MUSCULOAPONEUROTIC FIBROSARCOMA ONCOGENE HOMOLOG                                                                                                                                                                                                                                                                                                                                                                                                                            |
| MAO                       | 1.4.3.4, adrenaline oxidase, adrenal oxidase, amine oxidase, amine oxidase (flavin-containing), amine:oxygen oxidoreductase (deaminating) (flavin-containing), epinephrine oxidase, monoamine:O2 oxidoreductase (deaminating), Monoamine oxidase, polyamine oxidase, serotonin deaminase, spermidine oxidase, spermine oxidase, tyraminase, tyramine oxidase                                                                                                                                                                                                                                                                                             |
| MAP2K1/2                  | MEK1/2, MKK1/2                                                                                                                                                                                                                                                                                                                                                                                                                                                                                                                                                                                                                                           |
| MAP2K4/7                  | Jnkk, MEK 4/7, MKK 4/7                                                                                                                                                                                                                                                                                                                                                                                                                                                                                                                                                                                                                                   |
| MAP2K5                    | A1324775, A1428457, HsT17454, MAP kinase kinase 5, MAPKK5, MEK5, mitogen-activated protein kinase kinase 5, MKK5, PRKMK5                                                                                                                                                                                                                                                                                                                                                                                                                                                                                                                                 |
| Map3k                     | MapKKK, MEKK, MEKKs, Mkkk                                                                                                                                                                                                                                                                                                                                                                                                                                                                                                                                                                                                                                |
| MAPK7                     | b2b2346C, b2b2346Cio, BMK-1, ERK, ERK4, ERK-5, Erk-5-T, ERK7, FRK, LOC100912585, mitogen-activated protein kinase 7, mitogen-activated protein kinase 7-like, PRKM7                                                                                                                                                                                                                                                                                                                                                                                                                                                                                      |
| MGMT                      | AG, AGAT, AGT, A1627024, O6-ALKYLGUANINE DNA ALKYLTRANSFERASE, O-6-methylguanine-DNA methyltransferase                                                                                                                                                                                                                                                                                                                                                                                                                                                                                                                                                   |
| Mkk3/6                    | MEK3/6, Mkk3/6 (mitogen activated protein kinase kinase 3/6), MKK3/MKK6                                                                                                                                                                                                                                                                                                                                                                                                                                                                                                                                                                                  |
| NFE2L2                    | BM974200, HEBP1, IMDDH1, NR, NRF2, nuclear factor, erythroid 2-like 2, nuclear factor, erythroid derived 2, like 2                                                                                                                                                                                                                                                                                                                                                                                                                                                                                                                                       |
| NFKB                      | NF-κAPPA B, NF-κ B, nuclear factor-κ b, transcription factor nuclear factor κ b                                                                                                                                                                                                                                                                                                                                                                                                                                                                                                                                                                          |
| NOS2                      | CALCIUM-INDEPENDENT NOS, Hepatocyte NOS, HEP-NOS, Inducible NOS, iNOS, LOC497963, MAC-NOS, N, nitric oxide synthase 2, nitric oxide synthase 2, inducible, No, NOS, NOS2A, NOS-II, similar to Nitric oxide synthase, inducible (NOS type II) (Inducible NO synthase) (Inducible NOS) (iNOS)                                                                                                                                                                                                                                                                                                                                                              |
| NGO                       | Nadph-d, NADPH QUINONE OXIDOREDUCTASE                                                                                                                                                                                                                                                                                                                                                                                                                                                                                                                                                                                                                    |
| NR1/2                     | BXR, mP, mPXR, nuclear receptor subfamily 1 group 1 member 2, nuclear receptor subfamily 1, group I, member 2, ONR1, P, PAR, PAR1, PAR2, PARq, PRR, PXR, PXR1, PXR-1, PXR-2, S, SAR, SXR                                                                                                                                                                                                                                                                                                                                                                                                                                                                 |
| NR1/3                     | AA209988, A1651208, C, CA, CAR, CAR1, CAR2, CAR-beta, Care2, CAR-β, Constitutive androstane receptor, ESTM3, ESTM32, MB67, mC, nuclear receptor subfamily 1 group 1 member 3, nuclear receptor subfamily 1, group 1, member 3                                                                                                                                                                                                                                                                                                                                                                                                                            |
| Okadaic acid              | (2R)-3-[(2S,6R,8S,11R)-2-[(E,2R)-4-[(2S,2R,4R,6R,8A)-4-hydroxy-2-[(1S,3S)-1-hydroxy-3-[(3R,6S)-3-methyl-1,7-dioxaspiro[5.5]undecan-2-yl)butyl]-3-methylidenespiro[4a,7,8,8a-tetrahydro-4H-pyran]-3,2-b]pyran-6,5-oxalane]-2-yl)]but-3-en-2-yl]-11-hydroxy-4-methyl-1,7-dioxaspiro[5.5]undec-4-en-8-yl]-2-hydroxy-2-methylpropanoic acid, 78111-17-8, acanthofolicin, 9,10-deepithio-9,10-didehydro-, C44H68O13, OKA, okadonic acid                                                                                                                                                                                                                       |
| p38MAPK                   | P38, p38 MAP KINASE, P38 MITOGEN-ACTIVATED protein KINASE                                                                                                                                                                                                                                                                                                                                                                                                                                                                                                                                                                                                |
| Phase2 detoxifyingenz yme | phase 2 detoxifying enzyme, phase II drug metabolizing enzyme, phase II metabolizing enzyme, phase II metabolizing enzymes                                                                                                                                                                                                                                                                                                                                                                                                                                                                                                                               |
| phaseI detoxifyingenz yme | phase I drug metabolizing enzyme, phase I metabolizing enzyme, phase I metabolizing enzymes                                                                                                                                                                                                                                                                                                                                                                                                                                                                                                                                                              |
| PI3K                      | 1-phosphatidylinositol 3-kinase, 2.7.1.137, ATP:1-phosphatidyl-1D-myo-inositol 3-phosphotransferase, Phosphatidylinositol 3 kinase, phosphatidylinositol 3'-kinase, PI3-kinase, PtdIns 3 Kinase, type III phosphoinositide 3-kinase, type I phosphatidylinositol kinase, Vps34p                                                                                                                                                                                                                                                                                                                                                                          |
| PKC                       | Cnprkc, PKC, Pkc(s), Protein Kinase C                                                                                                                                                                                                                                                                                                                                                                                                                                                                                                                                                                                                                    |
| PP2A                      | protein PHOSPHATASE 2A, Protein Phosphatase Type2a                                                                                                                                                                                                                                                                                                                                                                                                                                                                                                                                                                                                       |
| PTGES3                    | 5730442A20Rik, cPG, cPGES, Gm9769, p23, p23 COCHAPERONE, p23 PR RELATED, PGES3, prostaglandin E synthase 3, prostaglandin E synthase 3, pseudogene, Ptg, Ptges, Ptges3-ps, RGD1561913, sid31, sid31p77, Teb, TEBP, Telomerase Binding Protein p23, Zhf6                                                                                                                                                                                                                                                                                                                                                                                                  |
| PXR Ligand                | 17-ethyl-10,13-dimethyl-2,3,4,5,6,7,8,9,11,12,14,15,16,17-tetradecahydro-1H-cyclopenta[α]phenanthrene, 26856-62-2, C21H36, pregnanes                                                                                                                                                                                                                                                                                                                                                                                                                                                                                                                     |
| RAF1                      | 6430402F14Rik, AA990557, B8129353, CMD1NN, c-R, Cra, CRAF, Craf1, D830050J10Rik, leukaemia A ONCOGENE HOMOLOG1, LEUKEMIA ONCOGENE HOMOLOG1, NS5, Raf-1 proto-oncogene, serine/threonine kinase, v-, v-Raf, v-raf-leukaemia viral oncogene 1, v-raf-leukaemia viral oncogene 1                                                                                                                                                                                                                                                                                                                                                                            |
| RBX1                      | 1500002P15Rik, AA517855, BA554C12.1, Gm9840, LOC100046417, Rbx1-ps, ring-box 1, ring-box 1, pseudogene, RN75, RO, ROC1                                                                                                                                                                                                                                                                                                                                                                                                                                                                                                                                   |
| RXRA                      | 9530071D11Rik, LOC101928454, NR2B1, retinoid 10 receptor α, Retinoid X receptor alpha, RXR, RXR-alpha, RXRα1a1, RXR-α, Rxr α 1                                                                                                                                                                                                                                                                                                                                                                                                                                                                                                                           |
| SLC01B1                   | HBLRR, LST-1, OATP1B1, OATP2, OATP-C, SLC21A5, SLC21A6, solute carrier organic anion transporter family member 1B1                                                                                                                                                                                                                                                                                                                                                                                                                                                                                                                                       |
| SMRT1alpha                | CTG26, N-CoR, nuclear receptor co-repressor 2, RETINOIC SILENCER, SM, SMAP270, SMR, SMRT, SMRTE, SMRTE-tau, TNRC14, TRAC, TRAC-1                                                                                                                                                                                                                                                                                                                                                                                                                                                                                                                         |
| SOD3                      | A1314465, EC-S, EC-SOD, ECSODPT, superoxide dismutase 3, superoxide dismutase 3, extracellular                                                                                                                                                                                                                                                                                                                                                                                                                                                                                                                                                           |
| Sulfotransferase          | 2.8.2.-, CHST1, CHST2, CHST4, CHST6, sulphotransferase, SULF, UST                                                                                                                                                                                                                                                                                                                                                                                                                                                                                                                                                                                        |
| SUMO1                     | DAP1, GMP1, OFC10, PI, PIC1, SE, SENP2, SENTRIN, small ubiquitin-like modifier 1, SMT3, SMT3C, SMT3H3, SMT3P3, Ubl, UBL1                                                                                                                                                                                                                                                                                                                                                                                                                                                                                                                                 |
| UGT                       | Glut-, UDP-glucuronosyltransferase, UDP GLUCURONYLTRANSFERASE, UDP-GT                                                                                                                                                                                                                                                                                                                                                                                                                                                                                                                                                                                    |

## Pathway Analysis Using IPA Software; canonical pathway

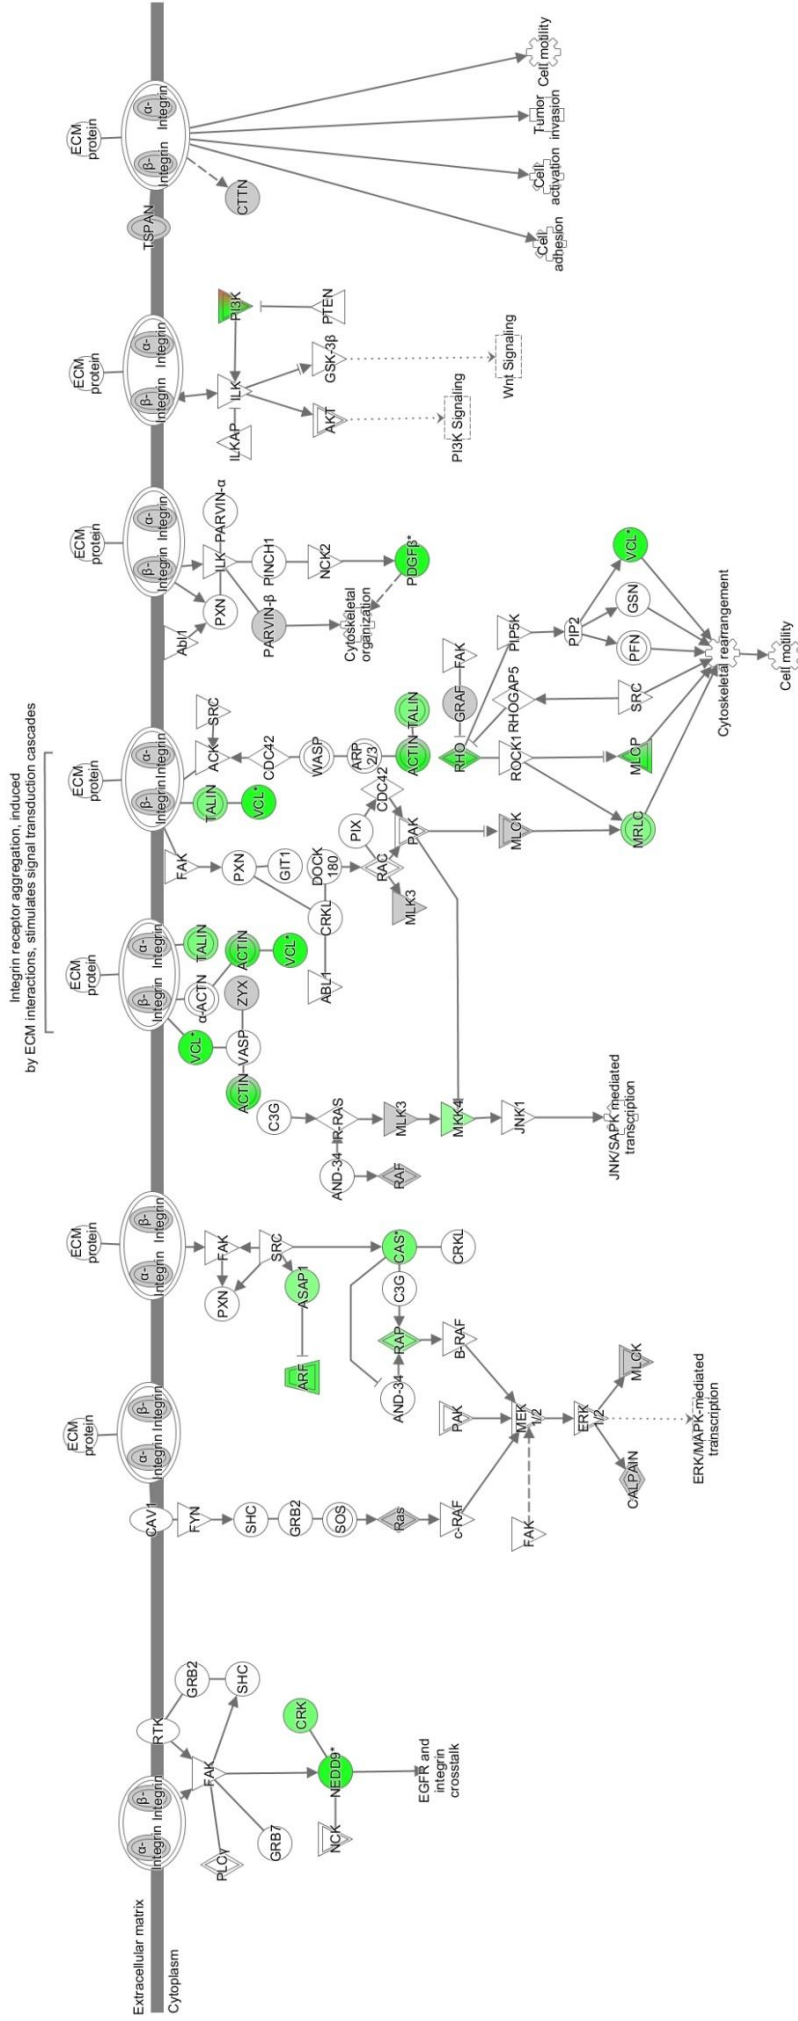

### Figure S11. Integrin Signaling at 1 h

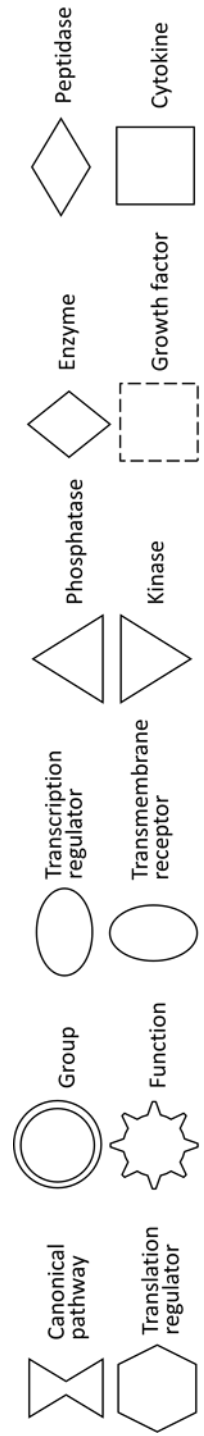

Red: Increased,  $FDR < 0.05$  versus control

Green: Decreased, FDR<0.05 versus control

| Symbol        | Synonym(s)                                                                                                                                                                                                                                                                                                                                                                                                                            |
|---------------|---------------------------------------------------------------------------------------------------------------------------------------------------------------------------------------------------------------------------------------------------------------------------------------------------------------------------------------------------------------------------------------------------------------------------------------|
| ABL1          | ABL, ABL proto-oncogene 1, non-receptor tyrosine kinase, A1325092, BCR-ABL, c-A, c-ABL, CABL1, c-abl oncogene 1, non-receptor tyrosine kinase, CHDSKM, E430008G22Rik, JTK7, LOC100909750, p145Abl, p150, tyrosine-protein kinase ABL1-like, v-abl                                                                                                                                                                                     |
| ACTIN         | CLEC9A Ligand, G-actin                                                                                                                                                                                                                                                                                                                                                                                                                |
| AKT           | AKT1/2/3, B/Akt, PKB, RAC-PK                                                                                                                                                                                                                                                                                                                                                                                                          |
| Alphactinin   | ACTININ, Actinin alpha, Actinin $\alpha$ , ACTN, $\alpha$ -Actinin, $\alpha$ Actinin human                                                                                                                                                                                                                                                                                                                                            |
| Alphaintegrin | Adhesion Receptors, alpha-Integrin, CD11, Cd11b/c, Integrin alpha, $\alpha$ - Integrin                                                                                                                                                                                                                                                                                                                                                |
| ARHGAP26      | 1810044B20RIK, 2610010G17RIK, 4933432P15RIK, A1853435, GRAF, GRAF1, GTPASE REGULATOR ASSOCIATED with FOCAL ADHESION KINASE PP125(FAK), mKIAA0621, OLIGOPHRENIN-1 LIKE, OPHN1L, OPHN1L1, Rho GTPase activating protein 26                                                                                                                                                                                                              |
| ARHGAP5       | AU014947, GF12, LRRGT00098, p190-, p190-B, p190BRhoGAP, p190Rhogap, p190RhoGAP-B, RhoGAP5, Rho GTPase Activating Protein 5                                                                                                                                                                                                                                                                                                            |
| ARHGEF7       | betaPIX, betaPi, BETA-PIX, betaPix-b, betaPix-c, Beta-Pix Cool, C, coo, Cool, COOL-1, mKIAA0142, Nbla10314, P, P50, P50BP, p8, P85, P85 beta pix, P85COOL1, P85SPR, P85 $\beta$ pix, PAK3, Pak3bp, PAK-INTERACTING EXCHANGE FACTOR beta, PAK-INTERACTING EXCHANGE FACTOR $\beta$ , PIX, PIXB, Rho guanine nucleotide exchange factor 7, Rho guanine nucleotide exchange factor (GEF7), $\beta$ -PIX, $\beta$ Pix-a, $\beta$ -Pix Cool |
| Arp2-3        | Arp, Arp2-3, ARP2-3 (Actin-related protein complex), Arp Complex                                                                                                                                                                                                                                                                                                                                                                      |
| ASAP1         | AMAP1, ArfGAP with SH3 domain, ankyrin repeat and PH domain 1, AV239055, CENTB4, DDEF1, DEF-1, LOC100039024, mKIAA1249, PAG2, PAP, s19, ZG14P                                                                                                                                                                                                                                                                                         |
| BCAR1         | A1385681, BCAR1 scaffold protein, Cas family member, breast cancer anti-estrogen resistance 1, C, CAS, CAS1, CASS1, Cr, CRKAS, LOC100131601, p130, P130CAP, P130CAS                                                                                                                                                                                                                                                                   |
| BCAR3         | A1131758, AND-, AND-34, BCAR3 adaptor protein, NSP family member, breast cancer anti-estrogen resistance 3, LOC101928013, MIG7, NSP2, RP11 488P31, SH2D3B                                                                                                                                                                                                                                                                             |
| Betaintegrin  | beta-Integrin, Integrin beta, $\beta$ - Integrin                                                                                                                                                                                                                                                                                                                                                                                      |
| BRAF          | 9930012E13RIK, AA120551, AA387315, AA473386, A1447469, Bra, B-RAF1, Braf-2, B-Raf proto-oncogene, serine/threonine kinase, Braf transforming gene, C230098H17, C87398, D6ErtD631, D6Endd631e, NS7, RAFB, RAFB1                                                                                                                                                                                                                        |
| CALPAIN       | CALCIUM DEPENDENT PROTEASE, M calpain                                                                                                                                                                                                                                                                                                                                                                                                 |
| CAV1          | BSCL3, Cav, cave, Cavelolin 1, CAVEOLIN, Cavelolin1, caveolin 1, caveolae protein, CGL3, LCCNS, LOC100362870, MSTP085, PPH3, VIP21                                                                                                                                                                                                                                                                                                    |
| CDC42         | A1747189, AU018915, CDC42Hs, cell division cycle 42, CELLULAR GROWTH REGULATING, G25K, TKS                                                                                                                                                                                                                                                                                                                                            |
| CRK           | c-Crk, c-Crk2, Cr, CRK2, Crko, CRK proto-oncogene, adaptor protein, FLJ11558, p38, v-crk avian sarcoma virus CT10 oncogene homolog                                                                                                                                                                                                                                                                                                    |
| CRKL          | 1110025F07RIK, AA589403, A1325100, Cr, crk-like protein-like, CRK like proto-oncogene, adaptor protein, Crkol, LOC100911248, mgc94609, snoop, v-crk avian sarcoma virus CT10 oncogene homolog-like                                                                                                                                                                                                                                    |
| CTTN          | 1110020L01Rik, amplexin, Cortactin, Ctnnb, Ems, EMS1                                                                                                                                                                                                                                                                                                                                                                                  |
| DOCK1         | 9130006G06RIK, A1854900, b2b3190C, b2b3190Clo, ced5, D630004B07RIK, dedicator of cyto-kinesis 1, Dock18, DOCK180, LOC679295, RGD1566072                                                                                                                                                                                                                                                                                               |
| ERK1/2        | MAPK p44/42, MAPK p44/p42, p42/44 mapk, P42/p44 erk, P42/p44 mapk, p42/p44 MAP KINASE                                                                                                                                                                                                                                                                                                                                                 |
| FYN           | A1448320, AW552119, C-FYN, Fyn proto-oncogene, FYN proto-oncogene, Src family tyrosine kinase, FYNT, LOC102724705, p59-FYN, p59 Fyn B, SLK, SRC-LIKE KINASE, SYN                                                                                                                                                                                                                                                                      |
| GIT1          | Cat-, Cat-1, GIT ArfGAP 1, p95C, p95Cat                                                                                                                                                                                                                                                                                                                                                                                               |
| GRB2          | AA408164, ASH, Ash-psi, EGFRBP-GRB2, GRAB2, GRBS, growth factor receptor bound protein 2, MST084, MSTP084, NCKAP2                                                                                                                                                                                                                                                                                                                     |
| GRB7          | growth factor receptor bound protein 7, mKIAA4028                                                                                                                                                                                                                                                                                                                                                                                     |
| GSK3B         | 7330414F15RIK, 8430431H08RIK, C86142, glycogen synthase kinase 3 beta, glycogen synthase kinase 3 $\beta$ , GSK-, GSK-3, GSK-3be, GSK-3beta, GSK-3 $\beta$ , GSKbeta, GSK $\beta$ , Tpk1                                                                                                                                                                                                                                              |
| GSN           | ADF, AGEL, Gelsolin, Gelsolin plasma isoform, LOC105376337                                                                                                                                                                                                                                                                                                                                                                            |
| ILK           | AA511515, ESTM2, ESTM4, HEL-S-28, ILK-1, ILK-2, integrin-linked kinase, P59, p59ILK                                                                                                                                                                                                                                                                                                                                                   |
| ILKAP         | 0710007A14RIK, 1600009O09RIK, AF095927, AK055417, ILKAP2, ILKAP3, ILK associated serine/threonine phosphatase, integrin-linked kinase-associated serine/threonine phosphatase 2C, PP2C-D, PP2C-DELTA, PP2C- $\delta$ , PPM10                                                                                                                                                                                                          |
| Integrin      | Integrin alpha-beta, integrin-extracellular matrix, INTEGRIN receptor, Integrin $\alpha$ - $\beta$                                                                                                                                                                                                                                                                                                                                    |
| LIMS1         | 2310016J22RIK, 4921524A02RIK, A1507642, AU021743, AW551584, C430041B13RIK, Li, LIM and senescent cell antigen-like domains 1, Lims11, LIM zinc finger domain containing 1, PIN, PINCH, PINCH-1, RGD1560732                                                                                                                                                                                                                            |
| MAP2K1/2      | MEK1/2, MKK1/2                                                                                                                                                                                                                                                                                                                                                                                                                        |
| MAP2K4        | JNKK, JNKK1, MAPK/ERK KINASE-1, MAPKK4, MEK4, mitogen-activated protein kinase kinase 4, MKK4, PRKMK4, SAPKK-1, Sek, SEK1, Ser, SERK1, SKK1                                                                                                                                                                                                                                                                                           |
| MAP3K11       | 2610017K16RIK, MEKK11, mitogen-activated protein kinase kinase kinase 11, Mlk, MLK-3, PTK1, RHOE, SPRK                                                                                                                                                                                                                                                                                                                                |
| MAPK8         | A1849689, C-JUN N-TERMINAL KINASE1, JNK, JNK1, JNK1A2, JNK21B1/2, JNK-46, mitogen-activated protein kinase 8, p46JNK1, p46JNK1 alpha, p46JNK1 $\alpha$ , Prk, PRKM8, SAPK1, SAPK1c, Sapk gamma, SAPK P46, Sapk $\gamma$ , STRESS-ACTIVATED protein KINASE-LIKE KINASE                                                                                                                                                                 |
| MLCP          | 3.1.3.53, Myosin-bound phosphatase, myosin light chain kinase phosphatase, myosin-light-chain-phosphatase, [myosin-light-chain]-phosphate phosphohydrolase, Myosin Phosphatase, Myosin PPTase, MYPT1, protein phosphatase 2A                                                                                                                                                                                                          |
| MRLC          | Myosin subunit regulatory light chain, Rlc                                                                                                                                                                                                                                                                                                                                                                                            |
| Mylk          | MLCK, Mylk                                                                                                                                                                                                                                                                                                                                                                                                                            |
| NCK           | NCK alpha.beta, NCK $\alpha$ . $\beta$                                                                                                                                                                                                                                                                                                                                                                                                |
| NCK2          | 4833426I10RIK, Grb, GRB4, LOC100503894, NCK adaptor protein 2, NCKbe, NCKbeta, Nck $\beta$ , non-catalytic region of tyrosine kinase adaptor protein 2                                                                                                                                                                                                                                                                                |
| NEDD9         | C, Ca, CAS2, CAS-L, CASS2, enhancer of filamentation 1, HEF1, MEF1, neural precursor cell expressed, developmentally down-regulated 9, neural precursor cell expressed, developmentally down-regulated gene 9, p105, P105hef1                                                                                                                                                                                                         |
| PARVA         | 2010012A22RIK, 5430400F08RIK, act, Actopaxin, Actp, A1225929, alpha PARVIN, AU042898, CH-IL, CH-ILKBP, MXRA2, Parvin, Parvin-alpha, parvin, alpha, Parvin- $\alpha$ , parvin, $\alpha$ , $\alpha$ PARVIN                                                                                                                                                                                                                              |
| PARVB         | aff, affixin, A1595373, AW742462, CGI-56, D15Gsk, D15Gsk1, Parvin-beta, parvin, beta, Parvin- $\beta$ , parvin, $\beta$                                                                                                                                                                                                                                                                                                               |
| PDGFB         | c-sis, IBCG5, PDGF-, PDGF-2, PDGF-BB, PDGF beta, PDGFbetaR, Pdgfrb, PDGFRbeta, PDGF- $\beta$ , platelet derived growth factor, B polypeptide, platelet derived growth factor subunit B, SIS, SSV                                                                                                                                                                                                                                      |
| PI3K          | 1-phosphatidylinositol 3-kinase, 2.7.1.137, ATP:1-phosphatidyl-1D-myo-inositol 3-phosphotransferase, Phosphatidylinositol 3 kinase, phosphatidylinositol 3'-kinase, PI3-kinase, Ptdlns 3 Kinase, type III phosphoinositide 3-kinase, type I phosphatidylinositol kinase, Vps34p                                                                                                                                                       |
| PIKFYVE       | 5230400C17RIK, CFD, FAB1, HEL37, KIAA0981, P, p235, phosphoinositide kinase, FYVE-type zinc finger containing, PI5K, Pip, PIP5K, PIP5K3, Pipk5k3, PipkIII, Type III PI 5-kinase, ZFYVE29                                                                                                                                                                                                                                              |
| PIP2          | C11H19O19P3R2, phosphatidylinositol-4,5-bisphosphate, phosphatidyl-myo-inositol 4,5-bisphosphate, PI(4,5)P2, P14,5P2, PIP2, Ptdlns(4,5)P2                                                                                                                                                                                                                                                                                             |
| PLC-gamma     | Phospholipase C gamma, Phospholipase C $\gamma$ , PLCG, PLC $\gamma$                                                                                                                                                                                                                                                                                                                                                                  |
| Profilin      | PFN                                                                                                                                                                                                                                                                                                                                                                                                                                   |
| PTEN          | 10q23del, 2310035O07RIK, A130070J02RIK, A1463227, B430203M17RIK, BZS, CWS1, DEC, GLM2, MHAM, MMAC, MMAC1, MUTATED IN MULTIPLE ADVANCED CANCERS, mutated in multiple advanced cancers 1, phosphatase and tensin homolog, PTEN1, PTENbeta, TEP, TEP1                                                                                                                                                                                    |
| PTK2          | FA, Fad, FADK, FADK1, FAK, FAK1, FAK related non-kinase, FR, p125FAK, p125FAK, PPP1R71, protein tyrosine kinase 2, PTK2 protein tyrosine kinase 2, TYROSINE KINASE 2                                                                                                                                                                                                                                                                  |
| PXN           | AW108311, AW123232, FLJ23042, P, PAX, PAXILLIN                                                                                                                                                                                                                                                                                                                                                                                        |
| RAF1          | 6430402F14RIK, AA990557, BB129353, CMD1NN, c-R, Cra, CRAF, Craf1, D830050J10Rik, leukaemia ONCOGENE HOMOLOG1, LEUKEMIA ONCOGENE HOMOLOG1, NS5, Raf-1 proto-oncogene, serine/threonine kinase, v-, v-Raf, v-raf-leukaemia viral oncogene 1, v-raf-leukemia viral oncogene 1                                                                                                                                                            |
| Ral           | Ral A/B                                                                                                                                                                                                                                                                                                                                                                                                                               |
| RAPGEF1       | 4932418O06RIK, C3G, C3G-1, C3G-2, Grf, GRF2, Rap guanine nucleotide exchange factor 1, Rap guanine nucleotide exchange factor (GEF) 1                                                                                                                                                                                                                                                                                                 |
| RHO           | GTPase Rho, Rho, Rho Family, RHO-GTPASE, Rho-like Gtpase                                                                                                                                                                                                                                                                                                                                                                              |
| ROCK1         | 1110055K06RIK, LOC100129157, P160ROCK, p160 ROCK-1, Rho-associated coiled-coil containing protein kinase 1, Roc, ROCK, ROCK-I, ROK, ROK beta, ROK $\beta$                                                                                                                                                                                                                                                                             |
| RRAS          | A1573426, p23, R, RAS related, related RAS viral (r-ras) oncogene, Rras1, Rras predicted                                                                                                                                                                                                                                                                                                                                              |
| SHC1          | p52SHC, p6, p66, p66s, P66shc, Sh, SHC, Shc (46 kDa isoform), SHCA, SHC adaptor protein 1, Shc p66 isoform, src homology 2 domain-containing transforming protein C1                                                                                                                                                                                                                                                                  |
| SRC           | ASV, AW259666, BS27, c-SRC, p60-Src, PP60, pp60c, Pp60/c-Src, pp60c-src, Rous sarcoma oncogene, SRC1, SRC proto-oncogene, non-receptor tyrosine kinase, THC6, TVHUSC                                                                                                                                                                                                                                                                  |
| TALIN         | TLN                                                                                                                                                                                                                                                                                                                                                                                                                                   |
| TNK2          | Ac, ACK, ACK1, Cdgip, LOC682784, p21cdc42Hs, Pyk, Pyk1, tyrosine kinase non receptor 2, tyrosine kinase, non-receptor, 2                                                                                                                                                                                                                                                                                                              |
| TSPAN         | TETRASPAN, TRANSMEMBRANE 4 SUPERFAMILY                                                                                                                                                                                                                                                                                                                                                                                                |
| VASP          | vasodilator-stimulated phosphoprotein                                                                                                                                                                                                                                                                                                                                                                                                 |
| VCL           | 9430097D22, AA571387, A1462105, AW545629, CMD1W, CMH15, HEL114, MV, MVCL, Vcl predicted, Vinculin                                                                                                                                                                                                                                                                                                                                     |
| ZYX           | 9530098H06RIK, ESP-2, HED-2, R7515, R75157, Z1XN, Zyxin                                                                                                                                                                                                                                                                                                                                                                               |

| Canonical pathway                                                                     | Group                                                                                 | Transcription regulator                                                               | Phosphatase                                                                           | Enzyme                                                                               | Peptidase                                                                           |
|---------------------------------------------------------------------------------------|---------------------------------------------------------------------------------------|---------------------------------------------------------------------------------------|---------------------------------------------------------------------------------------|--------------------------------------------------------------------------------------|-------------------------------------------------------------------------------------|
|  |  |  |  |  |  |
| Translation regulator                                                                 | Function                                                                              | Transmembrane receptor                                                                | Kinase                                                                                |                                                                                      | Cytokine                                                                            |
|  |  |  |  |  |                                                                                     |

Green: Decreased, FDR<0.05 versus control



## Pathway Analysis Using IPA Software; canonical pathway

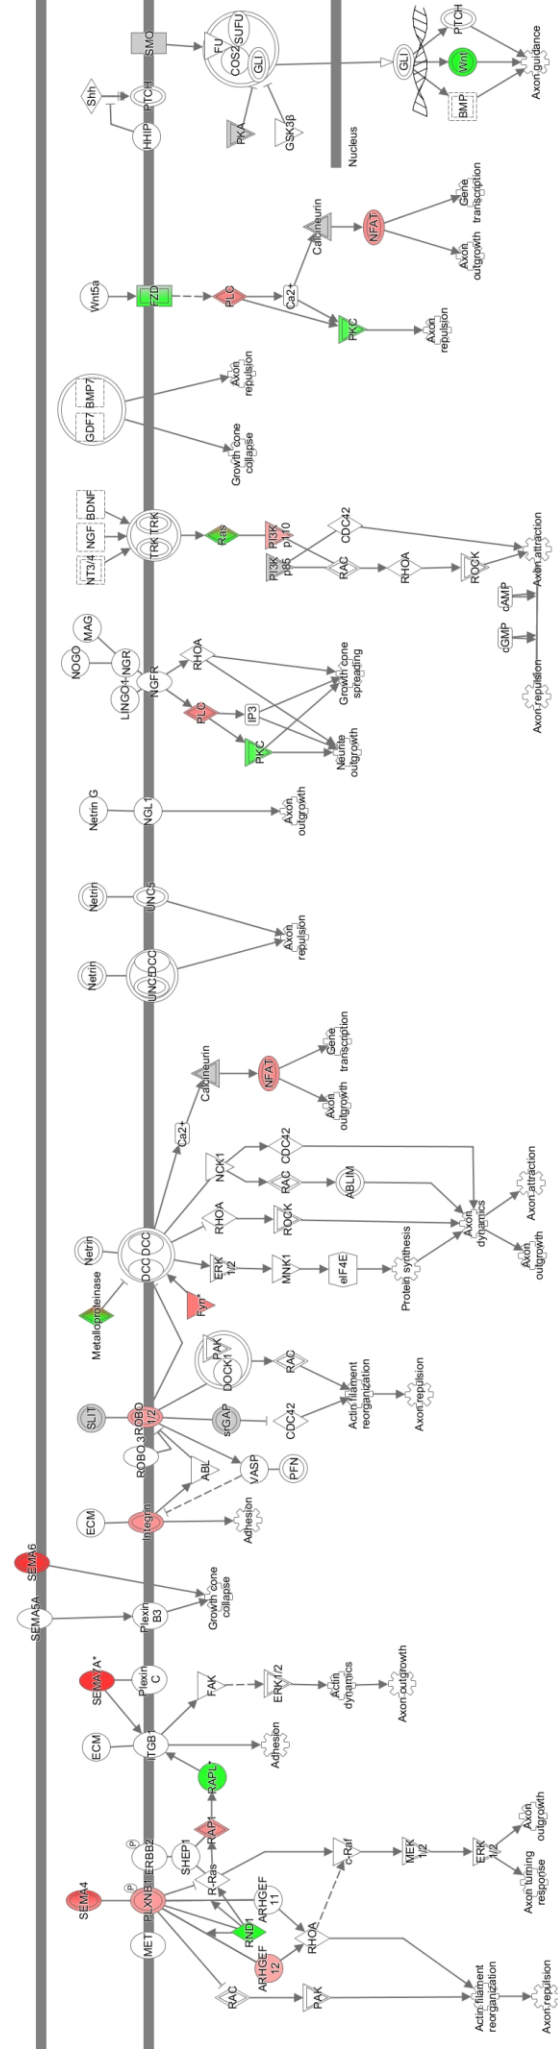

Figure S12. Axonal Guidance Signaling at 6 h (continued)

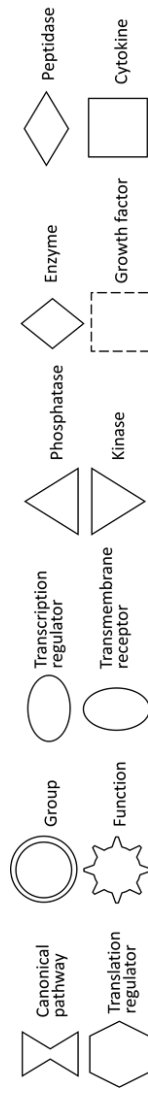

Red: Increased, FDR<0.05 versus control

Green: Decreased, FDR<0.05 versus control

| Symbol           | Synonym(s)                                                                                                                                                                                                                                                                                                                                                                                                                                                                                                                                                                                                                                                                                                                    |
|------------------|-------------------------------------------------------------------------------------------------------------------------------------------------------------------------------------------------------------------------------------------------------------------------------------------------------------------------------------------------------------------------------------------------------------------------------------------------------------------------------------------------------------------------------------------------------------------------------------------------------------------------------------------------------------------------------------------------------------------------------|
| ABL1             | ABL, ABL proto-oncogene 1, non-receptor tyrosine kinase, A1325092, BCR-ABL, c-A, c-ABL, CABL1, c-abl oncogene 1, non-receptor tyrosine kinase, CHDSKM, E430008G22Rik, JTK7, LOC100909750, p145Abl, p150, tyrosine-protein kinase ABL1-like, v-abl                                                                                                                                                                                                                                                                                                                                                                                                                                                                             |
| ADAM10           | 1700031C13Rik, AD10, AD18, ADAM metallopeptidase domain 10, a disintegrin and metallopeptidase domain 10, CD156c, CDw156, DISINTEGRIN-METALLOPROTEASE, HsT18717, kuz, kuzb, kuzbanian, MADM, RAK, RGD1566370, $\alpha$ Secretase                                                                                                                                                                                                                                                                                                                                                                                                                                                                                              |
| AKT              | AKT1/2/3, B/Akt, PKB, RAC-PK                                                                                                                                                                                                                                                                                                                                                                                                                                                                                                                                                                                                                                                                                                  |
| ARHGEF11         | GTRAP48, KIAA0380, mKIAA0380, P, PDZ-Rho, PDZ-RHOGEF, Prg, RhoGEF, Rho guanine nucleotide exchange factor 11, Rho guanine nucleotide exchange factor (GEF) 11                                                                                                                                                                                                                                                                                                                                                                                                                                                                                                                                                                 |
| ARHGEF12         | 2310014B11RIK, AU019857, L, LARG, LARG RhoGEF, mKIAA0382, PRO2792, Rho guanine nucleotide exchange factor 12, Rho guanine nucleotide exchange factor (GEF) 12                                                                                                                                                                                                                                                                                                                                                                                                                                                                                                                                                                 |
| ARHGEF15         | ARHGEF15, D130071N09, D530030K12Rik, E5, Ephexin5, Rho guanine nucleotide exchange factor 15, Rho guanine nucleotide exchange factor (GEF) 15, Vms-rhogef, Vsm-RhoGEF                                                                                                                                                                                                                                                                                                                                                                                                                                                                                                                                                         |
| ARHGEF6/7        | PIX                                                                                                                                                                                                                                                                                                                                                                                                                                                                                                                                                                                                                                                                                                                           |
| Arp2-3           | Arp, Arp2-3, ARP2-3 (Actin-related protein complex), Arp Complex                                                                                                                                                                                                                                                                                                                                                                                                                                                                                                                                                                                                                                                              |
| BAIAP2           | BAP2, BAP2 alpha, BAP2 $\alpha$ , BAR/IMD domain containing adaptor protein 2, brain-specific angiogenesis inhibitor 1-associated protein 2, FLAF3, IR, IRS-58, IRSP53, R75030, WAML                                                                                                                                                                                                                                                                                                                                                                                                                                                                                                                                          |
| BCAR1            | A1385681, BCAR1 scaffold protein, Cas family member, breast cancer anti-estrogen resistance 1, C, CAS, CAS1, CASS1, Cr, CRKAS, LOC100131601, p130, P130CAP, P130CAS                                                                                                                                                                                                                                                                                                                                                                                                                                                                                                                                                           |
| BDNF             | ANON2, Brain derived neurotrophic factor, BULN2, OCD1                                                                                                                                                                                                                                                                                                                                                                                                                                                                                                                                                                                                                                                                         |
| BMP              | BMP3, BMP-3A, BONE MORPHOGENIC, Osteogenin                                                                                                                                                                                                                                                                                                                                                                                                                                                                                                                                                                                                                                                                                    |
| BMP7             | bone morphogenetic protein 7, O, OP-1, osteogenic protein 1                                                                                                                                                                                                                                                                                                                                                                                                                                                                                                                                                                                                                                                                   |
| Ca2+             | 14127-61-8, Ca+2, calcium, calcium(2+), calcium cation, calcium citrate, calcium ion, calcium, ion (Ca2+), calcium ions, Citracal, tricalcium dicitrate                                                                                                                                                                                                                                                                                                                                                                                                                                                                                                                                                                       |
| Calcineurin      | Calcineurin, Calcineurin protein(s), CaN, Pp3                                                                                                                                                                                                                                                                                                                                                                                                                                                                                                                                                                                                                                                                                 |
| cAMP             | 11002-78-1, 33116-15-3, 3',5'-cyclic AMP, 3',5'-monophosphate, adenosine cyclic, 37839-81-9, (4aR,6R,7R,7aS)-6-(6-aminopurin-9-yl)-2-hydroxy-2-oxo-4a,6,7,7a-tetrahydro-4H-furo[3,2-d][1,3,2]dioxaphosphinin-7-ol, 54532-48-8, 55576-98-2, 60-92-4, 66067-13-8, 68407-13-6, adenosine 3',5'-phosphate, adenosine, cyclic 3',5'-(hydrogen phosphate), adenosine cyclic 3,5 monophosphate, adenosine cyclic 3',5'-monophosphate, adenosine cyclic monophosphate, C10H12N5O6P, cAMP, cyclic-3',5'-monophosphate, adenosine, cyclic adenosine monophosphate, cyclic adenylic acid, cyclic AMP, disodium salt, cyclic AMP, monoammonium salt, cyclic AMP, monopotassium salt, cyclic AMP, monosodium salt, cyclic AMP, sodium salt |
| CDC42            | A1747189, AU018915, CDC42Hs, cell division cycle 42, CELLULAR GROWTH REGULATING, G25K, TKS                                                                                                                                                                                                                                                                                                                                                                                                                                                                                                                                                                                                                                    |
| CDK5             | AW048668, Crk, Crk6, cyclin-dependent kinase 5, LIS7, Neuronal cdc2-like kinase, PSSALRE                                                                                                                                                                                                                                                                                                                                                                                                                                                                                                                                                                                                                                      |
| cGMP             | 3',5'-cyclic GMP, 7665-99-8, 9-[(4aR,6R,7R,7aS)-2,7-dihydroxy-2-oxo-4a,6,7,7a-tetrahydro-4H-furo[3,2-d][1,3,2]dioxaphosphinin-6-yl]-2-amino-1H-purin-6-one, C10H12N5O7P, cGMP, guanosine-3',5'-cyclic monophosphate, guanosine 3',5'-cyclic phosphate, guanosine cyclic 3',5'-(hydrogen phosphate)                                                                                                                                                                                                                                                                                                                                                                                                                            |
| Cofilin          | CFL                                                                                                                                                                                                                                                                                                                                                                                                                                                                                                                                                                                                                                                                                                                           |
| CRK/CRKL         | CRK, Crk/II and CrkL                                                                                                                                                                                                                                                                                                                                                                                                                                                                                                                                                                                                                                                                                                          |
| CXCL12           | chemokine (C-X-C motif) ligand 12, CXCL12 isoform 1, C-X-C motif chemokine ligand 12, hIRH, IRH, LOC105378278, PB, PBSF, PBSF/SD, Scyb1, SCYB12, SDF-, SDF1, SDF-1alpha, SDF-1 $\alpha$ , Stromal cell derived factor 1, TLS, TLSF, TP, TPAR1                                                                                                                                                                                                                                                                                                                                                                                                                                                                                 |
| CXCR4            | b2b220C, b2b220C10, CD184, CHEMOKINE CXCR4 receptor, chemokine (C-X-C motif) receptor 4, CHEMOKINE receptor 4, Crmk, Crmkar4, C-X-C motif chemokine receptor 4, D2S201E, FB22, fu, FUSIN, HM89, HSY3RR, LAP-3, LCR1, LESTR, LOC100047410, NPY3R, NPYR, NPYRL, NPYY3R, PB-C, PB-CKR, PBSF/SDF-1, Sdf, Sdf1r, WHIM, WHIMS                                                                                                                                                                                                                                                                                                                                                                                                       |
| DCC              | C030036D22RIK, Colorectal Ca+ supp, CRC18, CRCR1, DCC netrin 1 receptor, deleted in colorectal carcinoma, HGPPS2, Igdcc, IGDC1, MRMV1, NTN1R1                                                                                                                                                                                                                                                                                                                                                                                                                                                                                                                                                                                 |
| DOCK1            | 9130006G06Rik, A1854900, b2b3190C, b2b3190C10, ced5, D630004B07Rik, dedicator of cyto-kinesis 1, Dock18, DOCK180, LOC679295, RGD1566072                                                                                                                                                                                                                                                                                                                                                                                                                                                                                                                                                                                       |
| DPYSL2           | A1851130, Crm, CRMP-2, DHPRP2, dihydropyrimidinase-like 2, DR, DRP-2, Musunc33, N2A3, TOAD-, TOAD-64, Tuc-2a, Ul, ULIP-2                                                                                                                                                                                                                                                                                                                                                                                                                                                                                                                                                                                                      |
| DPYSL5           | CR, CRAM, Crm, CRMP, CRMP-5, CV2, dihydropyrimidinase-like 5, DRP-5, Ulip6                                                                                                                                                                                                                                                                                                                                                                                                                                                                                                                                                                                                                                                    |
| EGF              | A1790464, EGF-1, epidermal growth factor, HOMG4, URG                                                                                                                                                                                                                                                                                                                                                                                                                                                                                                                                                                                                                                                                          |
| EIF4E            | AUTS19, CAP-binding, CBP, EG668879, eIF-4, EIF4E1, EIF4EL1, Eif4e-ps, EIF4F, eukaryotic translation initiation factor 4E, If4, If4e                                                                                                                                                                                                                                                                                                                                                                                                                                                                                                                                                                                           |
| EphReceptor      | EPHA/B                                                                                                                                                                                                                                                                                                                                                                                                                                                                                                                                                                                                                                                                                                                        |
| EPHA             | EphA receptor, Ephrin A Receptor                                                                                                                                                                                                                                                                                                                                                                                                                                                                                                                                                                                                                                                                                              |
| EPHB             | EphB receptor, Eph Receptor B, Ephrin B Receptor                                                                                                                                                                                                                                                                                                                                                                                                                                                                                                                                                                                                                                                                              |
| Ephrin A         | Bsk ligand, Ephrin-A                                                                                                                                                                                                                                                                                                                                                                                                                                                                                                                                                                                                                                                                                                          |
| Ephrin B         | Ephrin B                                                                                                                                                                                                                                                                                                                                                                                                                                                                                                                                                                                                                                                                                                                      |
| ERBB2            | 1 NDF1, CD340, c-erbB, C-erb-b2, c-ne, c-neu, EGFR2, epidermal growth factor receptor 2, ErbB-, ERBB2 receptor, erb-b2 receptor tyrosine kinase 2, HER-, HER-2, HER-2 (ERBB2), HER2/Neu, I11Ju, I11Jus8, mKIAA3023, MLN 19, Ne, NEU, NGL, p185HER2, TKR1, V-ERBB2 NEURO/GLIOBLASTOMA-DERIVED ONCOGENE                                                                                                                                                                                                                                                                                                                                                                                                                         |
| ERK1/2           | MAPK p44/42, MAPK p44/p42, p42/44 mapk, P42/p44 erk, P42/p44 mapk, p42/p44 MAP KINASE                                                                                                                                                                                                                                                                                                                                                                                                                                                                                                                                                                                                                                         |
| FARP2            | A1465173, BC009153, D030026M03Rik, F, FERM, ARH/RhoGEF and pleckstrin domain protein 2, FERM, RhoGEF and pleckstrin domain protein 2, FIR, FLJ31039, FRG, mKIAA0793, PLEKHC3                                                                                                                                                                                                                                                                                                                                                                                                                                                                                                                                                  |
| FES              | A1586313, BB137047, c-fe, c-fes, feline sarcoma oncogene, FES proto-oncogene, tyrosine kinase, FPS, RGD1564385, V-FPS                                                                                                                                                                                                                                                                                                                                                                                                                                                                                                                                                                                                         |
| Frizzled         | Frizzled receptor, FZ, FZD, Wnt receptor                                                                                                                                                                                                                                                                                                                                                                                                                                                                                                                                                                                                                                                                                      |
| FYN              | A1448320, AW552119, C-FYN, Fyn proto-oncogene, FYN proto-oncogene, Src family tyrosine kinase, FYNT, LOC102724705, p59-FYN, p59 Fyn B, SLK, SRC-LIKE KINASE, SYN                                                                                                                                                                                                                                                                                                                                                                                                                                                                                                                                                              |
| G protein        | Galphabeta gamma, Galpha-Gbeta-Ggamma, Galphai-Gbeta-Ggamma, Galphaq-Gbeta-Ggamma, Gpro, G protein alpha beta gamma, G protein alpha-G protein beta-GDP-G protein gamma, G protein alpha-G protein beta-G protein gamma, G-protein complex, G protein $\alpha$ -G protein $\beta$ -GDP-G protein $\gamma$ , G protein $\alpha$ -G protein $\beta$ -G protein $\gamma$ , G-protein $\alpha$ - $\beta$ - $\gamma$ , Guanine nucleotide binding protein, Ga-G $\beta$ -G $\gamma$ , Gai-G $\beta$ -G $\gamma$ , Gaq-G $\beta$ -G $\gamma$ , Gq $\beta$ $\gamma$                                                                                                                                                                  |
| G proteinalpha   | Galpha, G-Protein Alpha Subunit, G protein $\alpha$ , G-Protein $\alpha$ Subunit, Ga                                                                                                                                                                                                                                                                                                                                                                                                                                                                                                                                                                                                                                          |
| G proteinalpha I | Galphai, Gi, Gi alpha, GI $\alpha$ , GNAI, Gn alpha, Gn $\alpha$ , G protein ai, G protein alpha I SUBUNITS, G protein $\alpha$ I, G protein $\alpha$ I SUBUNITS, Goi                                                                                                                                                                                                                                                                                                                                                                                                                                                                                                                                                         |
| G proteinbeta    | Gbeta, G-protein $\beta$ , G $\beta$                                                                                                                                                                                                                                                                                                                                                                                                                                                                                                                                                                                                                                                                                          |
| G proteingamma   | Ggamma, G protein gamma SUBUNITS, G-protein $\gamma$ , G protein $\gamma$ SUBUNITS, Gy                                                                                                                                                                                                                                                                                                                                                                                                                                                                                                                                                                                                                                        |
| GDF7             | BMP1, BMP12, growth differentiation factor 7                                                                                                                                                                                                                                                                                                                                                                                                                                                                                                                                                                                                                                                                                  |
| GDP              | 146-91-8, [(2R,3S,4R,5R)-5-(2-amino-6-oxo-1H-purin-9-yl)-3,4-dihydroxyoxolan-2-yl]methyl phosphono hydrogen phosphate, C10H15N5O11P2, guanosine 5'-(trihydrogen diphosphate), guanosine diphosphate                                                                                                                                                                                                                                                                                                                                                                                                                                                                                                                           |
| GIT1             | Cat-, Cat-1, GIT ArfGAP 1, p95C, p95Cat                                                                                                                                                                                                                                                                                                                                                                                                                                                                                                                                                                                                                                                                                       |
| GRB2             | AA408164, ASH, Ash-psi, EGFRBP-GRB2, GRAB2, GRBS, growth factor receptor bound protein 2, MST084, MSTP084, NCKAP2                                                                                                                                                                                                                                                                                                                                                                                                                                                                                                                                                                                                             |
| GSK3B            | 7330414F15Rik, 8430431H08Rik, C86142, glycogen synthase kinase 3 beta, glycogen synthase kinase 3 $\beta$ , GSK-, GSK-3, GSK-3be, GSK-3beta, GSK-3 $\beta$ , GSKbeta, GSK $\beta$ , Tpk1                                                                                                                                                                                                                                                                                                                                                                                                                                                                                                                                      |
| GTP              | [[[(2R,3S,4R,5R)-5-(2-amino-6-oxo-1H-purin-9-yl)-3,4-dihydroxyoxolan-2-yl]methoxy-hydroxyphosphoryl] phosphono hydrogen phosphate, 86-01-1, C10H16N5O14P3, GTP, guanosine 5'-(tetrahydrogen triphosphate), Mg-GTP                                                                                                                                                                                                                                                                                                                                                                                                                                                                                                             |
| HERC2            | D15F32S1, D15F32S1h, D15F37S1, D7H15F32S, D7H15F32S1, D7H15F37S, D7H15F37S1, HECT and RLD domain containing E3 ubiquitin protein ligase 2, jdf2, LOC101929832, mKIAA0393, MRT38, p528, r, rjs, SHEP1                                                                                                                                                                                                                                                                                                                                                                                                                                                                                                                          |
| HHIP             | H, Hedgehog-interacting protein, Hhi, Hhip1, Hi, HIP, Hip1, LOC100366089, RGD1564108                                                                                                                                                                                                                                                                                                                                                                                                                                                                                                                                                                                                                                          |
| IGF1             | C730016P09Rik, IGF, IGF-I, IGF-I-smC, INSULIN-LIKE GROWTH FACTOR 1, insulin like growth factor I, insulin-like somatomedin peptide I, MAD isoform 4, mecaseerin, mecaseerin recombinant, MGF, Preproinsulin-like growth factor ia, somatomedin C                                                                                                                                                                                                                                                                                                                                                                                                                                                                              |
| Integrin         | Integrin alpha-beta, integrin-extracellular matrix, INTEGRIN receptor, Integrin $\alpha$ - $\beta$                                                                                                                                                                                                                                                                                                                                                                                                                                                                                                                                                                                                                            |
| IP3              | 108340-81-4, 1,4,5-InsP3, [(1R,2S,3R,4R,5S,6R)-2,3,5-trihydroxy-4,6-diphosphonooxycyclohexyl] dihydrogen phosphate, 85166-31-0, 88269-39-0, C6H15O15P3, D-myo-Inositol, 1,4,5-tris(dihydrogen phosphate), D-myo-inositol (1,4,5)-triphosphate, D-myo-inositol 1,4,5-triphosphate, inositol 1,4,5-triphosphate, inositol 1,4,5-triphosphate, Ins(1,4,5)P3, InsP3, IP3, myo-inositol 1,4,5-triphosphate, phosphatidylinositol 1,4,5-triphosphate                                                                                                                                                                                                                                                                                |
| ITGB1            | 4633401G24RIK, AA409975, AA960159, beta1-Integrin, CD29, CD29 antigen, Fn, FNRB, Gm9863, GPIIA, integrin beta 1 (fibronectin receptor beta), integrin subunit beta 1, integrin subunit $\beta$ 1, Integrin $\beta$ 1, integrin $\beta$ 1 (fibronectin receptor $\beta$ ), Integrin $\beta$ 1 receptor, MDF2, MSK12, VLAB, VLA-BETA, VLA- $\beta$ , $\beta$ 1-Integrin, $\beta$ (1)-integrins                                                                                                                                                                                                                                                                                                                                  |
| ITSN1            | AA517634, AA545208, A1316805, A1839402, A1848451, EHS, EHS1, Ese, Ese1, INTERSECTIN, Intersectin 1, intersectin 1 (SH3 domain protein 1A), ITSN, SH3D1A, SH3 domain protein-1A, Sh3p, SH3P17                                                                                                                                                                                                                                                                                                                                                                                                                                                                                                                                  |
| KALRN            | 2210407G14RIK, ARHGEF24, AV235988, CHD5, CHDS5, DUET, DUO, E530005C20RIK, Gm539, H, HAPIP, Kalirin, Kalirin7, kalirin RhoGEF kinase, kalirin, RhoGEF kinase, Pcp10, TRAD                                                                                                                                                                                                                                                                                                                                                                                                                                                                                                                                                      |
| KIF7             | ACLS, AGBK, HLS2, JBTS12, kinesin family member 7, LOC254571, UNQ340                                                                                                                                                                                                                                                                                                                                                                                                                                                                                                                                                                                                                                                          |
| KLC1             | A1874768, kinesin light chain 1, KLC, Kn, KNS2, KNS2A                                                                                                                                                                                                                                                                                                                                                                                                                                                                                                                                                                                                                                                                         |
| L1CAM            | CAML1, CD171, HSAS, HSAS1, Hyd, L, L1, L1 cell adhesion molecule, L1 isoform, L1-N, MASA, MIC5, NCAM, N-CAM-L1, NEUROGLIAN, NgCAM, S10, SPG1                                                                                                                                                                                                                                                                                                                                                                                                                                                                                                                                                                                  |



| Symbol          | Synonym(s)                                                                                                                                                                                                                                                                                                                                                                                                                                                |
|-----------------|-----------------------------------------------------------------------------------------------------------------------------------------------------------------------------------------------------------------------------------------------------------------------------------------------------------------------------------------------------------------------------------------------------------------------------------------------------------|
| LIMK            | LIMK1/2, Lim Kinase                                                                                                                                                                                                                                                                                                                                                                                                                                       |
| LINGO1          | 4930471K13RIK, AV148400, FLJ14594, L, LE, LERN1, leucine rich repeat and Ig domain containing 1, LIN, LRRN6A, MRT64, UNQ20, UNQ201                                                                                                                                                                                                                                                                                                                        |
| LRRC4C          | 6430556C10RIK, KIAA1580, leucine rich repeat containing 4C, NGL-1, RGD1311013                                                                                                                                                                                                                                                                                                                                                                             |
| MAG             | 1B236, Gm, GMA, myelin-associated glycoprotein, sigle, SIGLEC-4A, SPG75                                                                                                                                                                                                                                                                                                                                                                                   |
| MAP2K1/2        | MEK1/2, MKK1/2                                                                                                                                                                                                                                                                                                                                                                                                                                            |
| MET             | A1838057, AUTS9, c-Met, DFNB97, HGF, HGF Binding, HGFR, LOC360378, met proto-oncogene, MET proto-oncogene, receptor tyrosine kinase, MetR, P, PAR4, RCCP2                                                                                                                                                                                                                                                                                                 |
| Metalloprotease | metallopeptidase, metallopeptidase activity, METALLOPROTEINASE, Mp                                                                                                                                                                                                                                                                                                                                                                                        |
| MICAL1          | MICAL, microtubule associated monooxygenase, calponin and LIM domain containing 1, N, NICAL                                                                                                                                                                                                                                                                                                                                                               |
| MKNK1           | 2410048M24Rik, MAP kinase-interacting serine/threonine kinase 1, MAPK interacting serine/threonine kinase 1, Mnk, MNK1                                                                                                                                                                                                                                                                                                                                    |
| MLC             | MYL, Myosin Light Chain, Rlc                                                                                                                                                                                                                                                                                                                                                                                                                              |
| NCK1            | 6330586M15RIK, D230010O13RIK, Nc, NCK, NCK adaptor protein 1, NCKalpha, Nck $\alpha$ , non-catalytic region of tyrosine kinase adaptor protein 1, p47Nck                                                                                                                                                                                                                                                                                                  |
| NCK2            | 4833426110RIK, Grb, GRB4, LOC100503894, NCK adaptor protein 2, NCKbe, NCKbeta, Nck $\beta$ , non-catalytic region of tyrosine kinase adaptor protein 2                                                                                                                                                                                                                                                                                                    |
| NEUROFILIN      | NRP                                                                                                                                                                                                                                                                                                                                                                                                                                                       |
| NF-AT           | NFATc                                                                                                                                                                                                                                                                                                                                                                                                                                                     |
| NGEF            | ARHGEF27, BESH3, ephe, EPHEXIN, Ephexin1, neuronal guanine nucleotide exchange factor, Tim, Tims2                                                                                                                                                                                                                                                                                                                                                         |
| NGF             | 2.5S NGF, Beta-NGF, HSAN5, nerve growth factor, Nerve growth factor, $\beta$ , NGFB, Ngf beta, Ngf $\beta$ , $\beta$ -nerve growth factor, $\beta$ -NGF                                                                                                                                                                                                                                                                                                   |
| NGFR            | CD271, FL-P75NTR, NGFR, Gp80-LNGFR, LN, LNGFR, nerve growth factor receptor, nerve growth factor receptor (TNFR superfamily, member 16), Ngf Receptor Subtype1, Np75, p7, p75, p75lnfr, p75LNGFR, p75N, p75 NEUROTROPHIN receptor, p75NGFR, p75NTR, p75(NTR), RNNGFR, Tnfrs, TNFRSF16                                                                                                                                                                     |
| NTNG1           | A930010C08RIK, A1853992, KIAA0976, Laminet-1, Lmn, Lmnt1, LOC102724829, Netrin G, NETRIN G1, RGD1563465                                                                                                                                                                                                                                                                                                                                                   |
| P110(pi3k)      | p110 PI3K, p110 (pi3k), PI3K P110                                                                                                                                                                                                                                                                                                                                                                                                                         |
| Patched         | PTC, PTCH                                                                                                                                                                                                                                                                                                                                                                                                                                                 |
| PDGF            | Pdgf Receptor Ligand                                                                                                                                                                                                                                                                                                                                                                                                                                      |
| PFN             | Profilin                                                                                                                                                                                                                                                                                                                                                                                                                                                  |
| PI3K            | 1-phosphatidylinositol 3-kinase, 2.7.1.137, ATP:1-phosphatidyl-1D-myo-inositol 3-phosphotransferase, Phosphatidylinositol 3 kinase, phosphatidylinositol 3'-kinase, PI3-kinase, PtdIns 3 Kinase, type III phosphoinositide 3-kinase, type I phosphatidylinositol kinase, Vps34p                                                                                                                                                                           |
| PI3Kp85         | p85, p85 PI3K, p85 (pi3kr)                                                                                                                                                                                                                                                                                                                                                                                                                                |
| PKA             | A-Kinase, cAMP-Dependent Protein Kinase, cyclic AMP depended protein kinase, protein KINASE A                                                                                                                                                                                                                                                                                                                                                             |
| PKC             | Cnppc, PKC, Pkc(s), Protein Kinase C                                                                                                                                                                                                                                                                                                                                                                                                                      |
| PLC             | 3.1.4.3, alpha-toxin, Clostridium oedematiens beta- and g-toxins, Clostridium oedematiens $\beta$ - and g-toxins, Clostridium welchii alpha-toxin, Clostridium welchii $\alpha$ -toxin, heat-labile haemolysin, heat-labile hemolysin, lecithinase C, lipophosphodiesterase C, lipophosphodiesterase I, phosphatidase C, phosphatidylcholine cholinephosphohydrolase, PHOSPHOINOSITIDE SPECIFIC PHOSPHOLIPASE C, Phospholipase C, Pi-plc, $\alpha$ -toxin |
| Plexin A        | PLXN-A                                                                                                                                                                                                                                                                                                                                                                                                                                                    |
| PLXNB3          | A1451018, KIAA1206, PI, PLEXB3, Plexin B3, PLEXR, PLXN6, RGD1560615                                                                                                                                                                                                                                                                                                                                                                                       |
| PLXNC1          | 2510048K12Rik, AW742158, CD232, Plexin C, PLEXIN C1, v, VESPR                                                                                                                                                                                                                                                                                                                                                                                             |
| PLXND1          | 6230425C21Rik, b2b1863C, b2b1863Clo, b2b553C, b2b553Clo, PLEXD1, Plexin D1                                                                                                                                                                                                                                                                                                                                                                                |
| PTK2            | FA, Fad, FADK, FADK 1, FAK, FAK1, FAK related non-kinase, FR, p125FAK, pp125FAK, PPP1R71, protein tyrosine kinase 2, PTK2 protein tyrosine kinase 2, TYROSINE KINASE 2                                                                                                                                                                                                                                                                                    |
| PTPN11          | 2700084A17Rik, AW536184, BPTP3, CFC, JMML, METCDS, MGC14433, Noonan syndrome 1, NS1, protein tyrosine phosphatase non-receptor type 11, protein tyrosine phosphatase, non-receptor type 11, PTP, PTP-1D, PTP2C, S, SAP-2, Sh, SH-P, SHP-2, SH-PTP2, SH-PTP3, Src homology protein 2, SYP                                                                                                                                                                  |
| PXN             | AW108311, AW123232, FLJ23042, P, PAX, PAXILLIN                                                                                                                                                                                                                                                                                                                                                                                                            |
| RAF1            | 6430402F14RIK, AA990557, BB129353, CMD1NN, c-R, Cra, CRAF, Craf1, D830050J10Rik, leukaemia ONCOGENE HOMOLOG1, LEUKEMIA ONCOGENE HOMOLOG1, NS5, Raf-1 proto-oncogene, serine/threonine kinase, v-, vRaf, v-raf-Heukaemia viral oncogene 1, v-raf-leukemia viral oncogene 1                                                                                                                                                                                 |
| RAP1            | RAP1A/B                                                                                                                                                                                                                                                                                                                                                                                                                                                   |
| RASA1           | CM-AVM, CMAVM1, G, GAP, GAPX, p120-, p120GAP, P120RASGAP, PKWS, RASA, RASGAP, RAS p21 protein activator 1                                                                                                                                                                                                                                                                                                                                                 |
| RASSF5          | 1300019G20Rik, AU042887, MAXP1, No, Nor, NORE1, Nore1A, NORE1B, RAPL, Ras association domain family member 5, Ras association (RalGDS/AF-6) domain family member 5, RASSF3                                                                                                                                                                                                                                                                                |
| RGS3            | 4930506N09RIK, C2, C2PA-, C2PA-RGS3, GRS3, PDZ-R, PDZ-RGS3, regulator of G-protein signaling 3, RG, RGP3, RGS3S, SRB-RGS                                                                                                                                                                                                                                                                                                                                  |
| RHOA            | A, Ar, ARH12, ARHA, Arha1, ARHA2, EDFAOB, R, ras homolog family member A, ras-related homolog 12, RHO1, RHO12, RHOH12                                                                                                                                                                                                                                                                                                                                     |
| RHOD            | A1326383, Ar, ARHD, ras homolog family member D, Rho, RHOHP1, RHOM                                                                                                                                                                                                                                                                                                                                                                                        |
| RND1            | A, A830014L09RIK, ARHS, RHO6, Rho family GTPase 1, RHOS                                                                                                                                                                                                                                                                                                                                                                                                   |
| ROBO3           | HGPPS, HGPPS1, HGPS, Rbi, RBIG1, Ri, Rig, RIG1, Ro, Rob, Robo3a, Robo3b, Robo3 (predicted), roundabout guidance receptor 3, Roundabout homolog 3                                                                                                                                                                                                                                                                                                          |
| ROCK            | RhoA-Binding Kinase alpha/beta, RhoA-Binding Kinase $\alpha/\beta$ , Rho Kinase, ROK, ROK alpha/beta, ROK $\alpha/\beta$                                                                                                                                                                                                                                                                                                                                  |
| RRAS            | A1573426, p23, R, RAS related, related RAS viral (r-ras) oncogene, Rras1, Rras predicted                                                                                                                                                                                                                                                                                                                                                                  |
| RTN4            | 1110020G17Rik, AA407876, AA409940, AA960376, ASY, C130026110Rik, mKIAA0886, mKIAA4153, N, Nbla00271, Nbla10545, NgA, NI220/250, No, Nog, NOGO, NOGO-A, Nogo A/B, Nogo B, NSP, NSP-CL, reticulin 4, RTN4-A, RTN4-B1, RTN4-C, RTN-X, Vp20                                                                                                                                                                                                                   |
| RTN4R           | N, Ng, NGR, NGR1, NOGO66, NOGOR, reticulin 4 receptor                                                                                                                                                                                                                                                                                                                                                                                                     |
| SDC2            | 4833414L08RIK, AA960457, CD362, fibro, heparan sulphate proteoglycan 1, Hsp, HSPG, HSPG1, Syn, SYND2, syndecan-2                                                                                                                                                                                                                                                                                                                                          |
| SDCBP           | MDA-, MDA-9, ST1, Sy, SYCL, syn, syndecan binding protein, synte, Syntenin, syntenin-1, TACIP18                                                                                                                                                                                                                                                                                                                                                           |
| SEMA3           | sema domain, Ig domain, short basic domain, Semaphorin3                                                                                                                                                                                                                                                                                                                                                                                                   |
| SEMA5A          | 5930434A13, 9130201M22RIK, A1464145, sem, sema domain, seven thrombospondin repeats (type 1 and type 1-like), transmembrane domain (TM) and short cytoplasmic domain, (semaphorin) 5A, SEMAF, semaphorin 5A, semF                                                                                                                                                                                                                                         |
| SEMA7A          | 2900057C09RIK, CD108, CDw108, H-SEMA-K1, H-Sema-L, JMH, M-Sema-L, Se, sema domain, immunoglobulin domain (Ig), and GPI membrane anchor, (semaphorin) 7A, SEMAK1, SEMAL, semaphorin 7A (John Milton Hagen blood group)                                                                                                                                                                                                                                     |
| SHANK2          | AUTS17, CORTBP1, CTINBP1, mKIAA1022, P, ProSAP1, SH3 and multiple ankyrin repeat domains 2, SHANK, SPANK-3                                                                                                                                                                                                                                                                                                                                                |
| SHC1            | p52SHC, p6, p66, p66s, P66shc, Sh, SHC, Shc (46 kDa isoform), SHCA, SHC adaptor protein 1, Shc p66 isoform, src homology 2 domain-containing transforming protein C1                                                                                                                                                                                                                                                                                      |
| SHH             | 9530036O11Rik, Dsh, HHG1, HLP3, HPE3, HX, Hxl3, LOC105375595, M100081, MCOPCB5, ShhNC, SMMCI, sonic hedgehog, sonic hedgehog signaling molecule, TPT, TPTPS                                                                                                                                                                                                                                                                                               |
| SMO             | bnb, CRJS, E130215L21Rik, FZD11, Gx, PHLS, SMOH, Smoothened, smoothened, fizzled class receptor                                                                                                                                                                                                                                                                                                                                                           |
| STK36           | 1700112N14RIK, B930045J24, FU, Fuse, Fused, mKIAA1278, serine/threonine kinase 36, Stk36 (predicted)                                                                                                                                                                                                                                                                                                                                                      |
| SUFU            | b2b273C, JBTS32, PRO1280, Su, SUFUH, SUFU negative regulator of hedgehog signaling, SUFUXL                                                                                                                                                                                                                                                                                                                                                                |
| Trk Receptor    | NTRK, TRK, tropomyosin-receptor-kinase                                                                                                                                                                                                                                                                                                                                                                                                                    |
| Tubulin         | microtubule, tubulin complex                                                                                                                                                                                                                                                                                                                                                                                                                              |
| UNC5            | UNC5H                                                                                                                                                                                                                                                                                                                                                                                                                                                     |
| VASP            | vasodilator-stimulated phosphoprotein                                                                                                                                                                                                                                                                                                                                                                                                                     |
| WNT5A           | 8030457G12Rik, hWNT5A, LOC102724616, wingless-type MMTV integration site family, member 5A, Wnt-, Wnt family member 5A                                                                                                                                                                                                                                                                                                                                    |

# Pathway Analysis Using IPA Software; canonical pathway

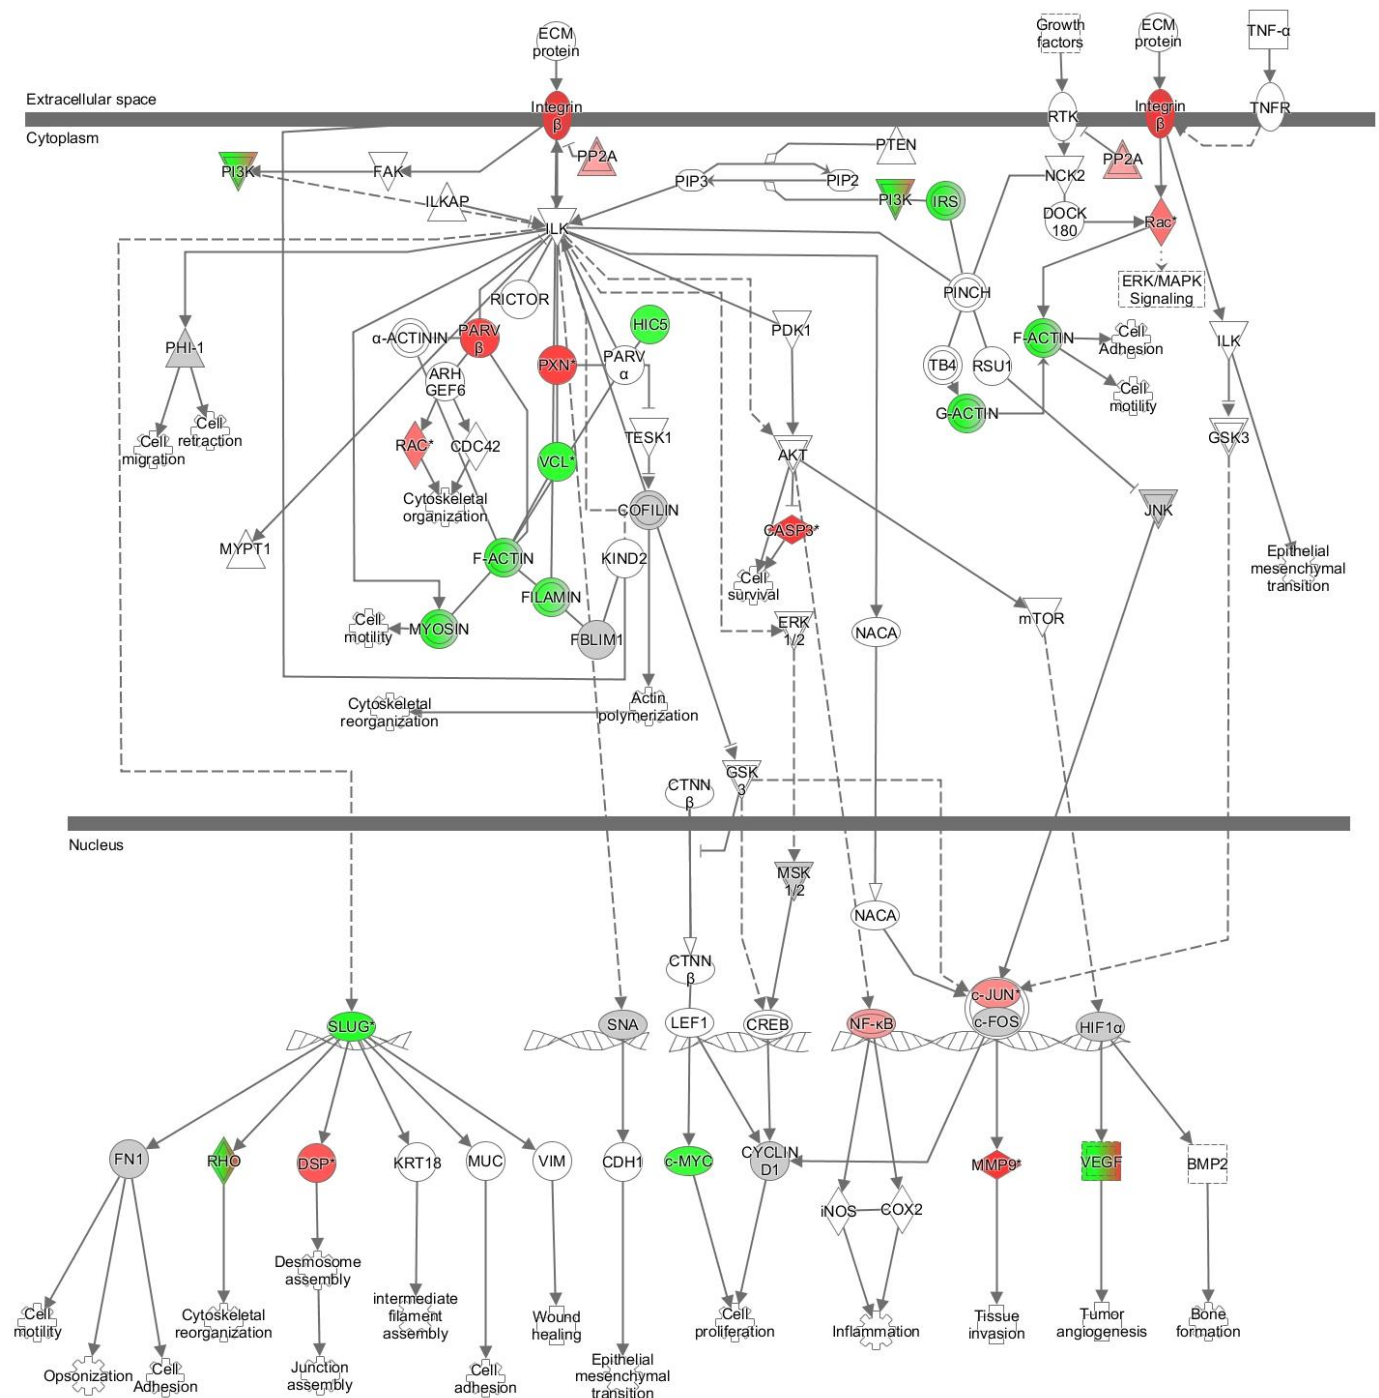

Figure S13. ILK Signaling at 6 h

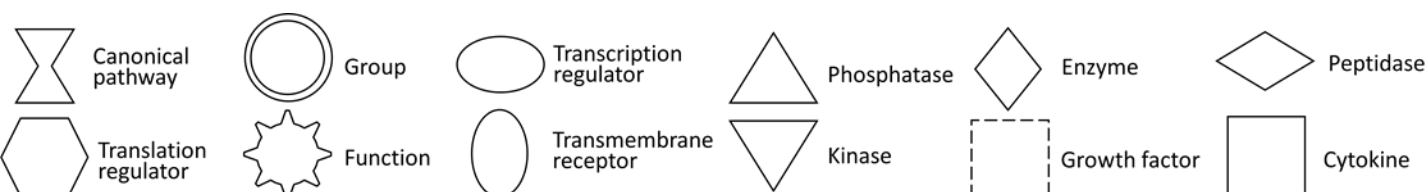

Red: Increased, FDR<0.05 versus solvent control

Green: Decreased, FDR<0.05 versus solvent control

| Symbol       | Synonym(s)                                                                                                                                                                                                                                                                                                                                                                                                                                                                                                                                                     |
|--------------|----------------------------------------------------------------------------------------------------------------------------------------------------------------------------------------------------------------------------------------------------------------------------------------------------------------------------------------------------------------------------------------------------------------------------------------------------------------------------------------------------------------------------------------------------------------|
| AKT          | AKT1/2/3, B/Akt, PKB, RAC-PK                                                                                                                                                                                                                                                                                                                                                                                                                                                                                                                                   |
| Alphactinin  | ACTININ, Actinin alpha, Actinin $\alpha$ , ACTN, $\alpha$ -Actinin, $\alpha$ Actinin human                                                                                                                                                                                                                                                                                                                                                                                                                                                                     |
| Ap1          | activator protein-1, c-Jun                                                                                                                                                                                                                                                                                                                                                                                                                                                                                                                                     |
| ARHGEF6      | 1600028C08RIK, 1700038J06RIK, 4930592P22RIK, alp, alpha-PIX, COOL2, MRX46, PIXA, Pix-alpha, Pix- $\alpha$ , Rac/Cdc42 guanine nucleotide exchange factor 6, Rac/Cdc42 guanine nucleotide exchange factor (GEF) 6, $\alpha$ -PIX                                                                                                                                                                                                                                                                                                                                |
| Betaintegrin | beta-Integrin, Integrin beta, $\beta$ -Integrin                                                                                                                                                                                                                                                                                                                                                                                                                                                                                                                |
| BMP2         | AI467020, BDA2, Bmp, BMP2A, bone morphogenetic protein 2, BONE MORPHOGENIC protein 2, SSFSC1, SSFSC                                                                                                                                                                                                                                                                                                                                                                                                                                                            |
| CASP3        | A830040C14RIK, AC-, AC-3, Casp, Caspase-3, CASPASE-3 p20, CC3, CPP, CPP-32, CPP32B, CPP32-beta, CPP32- $\beta$ , Ice-like cysteine protease, Lice, mld, mldy, SCA-1, Ya, YAMA                                                                                                                                                                                                                                                                                                                                                                                  |
| CCND1        | AI327039, B-CELL CLL/LYMPHOMA 1, bcl-, BCL1, cD1, CycD1, CYCLIN D1, Cyl-, Cyl-1, D11S287E, G1/S-Specific Cyclin D1, PR, PRAD1, U21B31                                                                                                                                                                                                                                                                                                                                                                                                                          |
| CDC42        | AI747189, AU018915, CDC42Hs, cell division cycle 42, CELLULAR GROWTH REGULATING, G25K, TKS                                                                                                                                                                                                                                                                                                                                                                                                                                                                     |
| CDH1         | AA960649, ARC-1, BCDS1, cadherin 1, Cadherin E, CD324, CDHE, CSEIL, E-ca, ECAD, E-cadh, E-cadherin, L-C, L-CAM, Um, UVO, uvomorulin                                                                                                                                                                                                                                                                                                                                                                                                                            |
| COFILIN      | CFL                                                                                                                                                                                                                                                                                                                                                                                                                                                                                                                                                            |
| CREB         | Cbp, Cyclic AMP response element binding                                                                                                                                                                                                                                                                                                                                                                                                                                                                                                                       |
| CTNNB1       | armadillo, Beta-cat, beta CATENIN, Bfc, Cat, CATENIN beta, catenin beta 1, catenin (cadherin associated protein), beta 1, catenin (cadherin associated protein), $\beta$ 1, CATENIN $\beta$ , catenin $\beta$ 1, CATNB, CTNB1, CTNNB, CTNN beta, CTNN $\beta$ , EVR7, Mesc, MRD19, NEDSDV, $\beta$ -cat, $\beta$ -catenin                                                                                                                                                                                                                                      |
| DOCK1        | 9130006G06RIK, A1854900, b2b3190C, b2b3190Clo, ced5, D630004B07RIK, dedicator of cyto-kinesis 1, Dock18, DOCK180, LOC679295, RGD1566072                                                                                                                                                                                                                                                                                                                                                                                                                        |
| DSP          | 2300002E22RIK, 5730453H04RIK, AA407887, AA407888, AW109828, D, DCWHKTA, desmoplakin, DP, DPLI, r, rul                                                                                                                                                                                                                                                                                                                                                                                                                                                          |
| ERK1/2       | MAPK p44/42, MAPK p44/p42, p42/44 mapk, P42/p44 erk, P42/p44 mapk, p42/p44 MAP KINASE                                                                                                                                                                                                                                                                                                                                                                                                                                                                          |
| F Actin      | Filamentous Actin                                                                                                                                                                                                                                                                                                                                                                                                                                                                                                                                              |
| FBLIM1       | 2410043F08RIK, C, CAL, DKFZp434G171, Fbl, FBLP-1, filamin binding LIM protein 1, Gt10, hnRNP L, mig, migfi, MIGFILIN, migfilin(s)                                                                                                                                                                                                                                                                                                                                                                                                                              |
| FERM2        | AA960555, FERM domain containing kindlin 2, fermitin family member 2, Kind, KIND2, KINDLIN 2, Mig, MIG2, Plekh, PLEKHC1, UNC112, UNC112B                                                                                                                                                                                                                                                                                                                                                                                                                       |
| FILAMIN      | Abp, ABP280/FH1                                                                                                                                                                                                                                                                                                                                                                                                                                                                                                                                                |
| FN1          | cFn, CIG, E330027I09, ED-B, F, FIBNEC, Fibronectin, FIBRONECTIN 1, Fibronectin3 M1, Fibronectin i, FINC, FN, FN1 isoform 1, FNZ, GFND, GFND2, LETS, MSF, SMDCF                                                                                                                                                                                                                                                                                                                                                                                                 |
| FOS          | AP-1, c-f, C-FOS, D12Rfj, D12Rfj1, FBj osteosarcoma oncogene, Fos proto-oncogene, AP-1 transcription factor subunit, p55                                                                                                                                                                                                                                                                                                                                                                                                                                       |
| Gsk3         | Glycogen synthase kinase, Gsk, GSK3 alpha/beta, GSK3 $\alpha/\beta$                                                                                                                                                                                                                                                                                                                                                                                                                                                                                            |
| HIF1A        | AA959795, bHLHe7, bHLHe78, HIF-1, HIF-1-ALPHA, HIF-1 $\alpha$ (hydroxylated), HIF-1- $\alpha$ , HIF-1 $\alpha$ (hydroxylated), Hypoxia inducible factor 1 alpha subunit, hypoxia inducible factor 1, alpha subunit, hypoxia inducible factor 1 subunit alpha, hypoxia inducible factor 1 subunit $\alpha$ , Hypoxia inducible factor 1 $\alpha$ subunit, hypoxia inducible factor 1, $\alpha$ subunit, MO, MOP1, PASD8                                                                                                                                         |
| ILK          | AA511515, ESTM2, ESTM24, HEL-S-28, ILK-1, ILK-2, integrin-linked kinase, P59, p59ILK                                                                                                                                                                                                                                                                                                                                                                                                                                                                           |
| ILKAP        | 0710007A14RIK, 1600009O09RIK, AF095927, AK055417, ILKAP2, ILKAP3, ILK associated serine/threonine phosphatase, integrin-linked kinase-associated serine/threonine phosphatase 2C, PP2C-D, PP2C-DELTA, PP2C- $\delta$ , PPM10                                                                                                                                                                                                                                                                                                                                   |
| IRS          | INSULIN receptor SUBSTRATE                                                                                                                                                                                                                                                                                                                                                                                                                                                                                                                                     |
| JNK          | JNK 54/46, Jnk p56, JNK/SAPK, JUN KINASE, p40, p47, Sapk/Jnk                                                                                                                                                                                                                                                                                                                                                                                                                                                                                                   |
| JUN          | Activator protein 1, AP-1, API-1, c-jun, cJUN, Junc, jun proto-oncogene, Jun proto-oncogene, AP-1 transcription factor subunit, LOC100288387, LOC100291417, LOC100293034, p39, v-Jun, V-jun Avian Sarcoma Virus 17 Oncogene Homolog, V-jun Sarcoma Virus 17 Oncogene Homolog                                                                                                                                                                                                                                                                                   |
| KRT18        | 48-kD Keratin, CK-18, Ck D, CYK18, K18, K1cr, keratin 18, Keratin complex 1 acidic gene 18, Krt1-1, KRT1-18                                                                                                                                                                                                                                                                                                                                                                                                                                                    |
| LEF1         | 3000002B05, A451430, Lef-, lymphoid enhancer binding factor 1, TCF10, TCF1ALPHA, TCF7L3, TCF/LEF                                                                                                                                                                                                                                                                                                                                                                                                                                                               |
| LIMS         | PINCH                                                                                                                                                                                                                                                                                                                                                                                                                                                                                                                                                          |
| MAP2K6       | MAPKK6, Mapk kinase 6, MEK6, mitogen-activated protein kinase kinase 6, MKK6, MKK6BE, Prkm, PRKMK6, Rac, SAP, SAPKK-3                                                                                                                                                                                                                                                                                                                                                                                                                                          |
| MMP9         | AW743869, B/MMP, B/MMP9, C1g4, CLG4B, COLLAGENASE type IV, Gelatinase B, GELB, GI 92-kda, MANDP2, matrix metalloproteinase 9, METALLOPROTEINASE 9, MMP-, pro-MMP-9                                                                                                                                                                                                                                                                                                                                                                                             |
| MTOR         | 2610315D21RIK, AI327068, fl, Flat, Fr, FRAP, FRAP1, FRAP2, FRB, mechanistic target of rapamycin kinase, RA, RAF, RAFT1, RAP1, RRAFT1, SKS                                                                                                                                                                                                                                                                                                                                                                                                                      |
| MUC1         | ADMCKD1, ADMCKD, ADTKD2, CA 15-3, CD227, EM, EMA, Episialin, H23AG, KL-6, MAM6, MCD, MCKD1, MCKD, MUC1-CT, Mucin1, Mucin, mucin 1, cell surface associated, Mucin-1 subunit beta, Mucin-1 subunit $\beta$ , PANCREATIC MUCIN, PEM, PEMT, PUM                                                                                                                                                                                                                                                                                                                   |
| MYC          | AU016757, bHLHe3, bHLHe39, CMYC, C-MYC-P64, mMyc, MRTL, Myc2, MYCC, MYC proto-oncogene, bHLH transcription factor, myelocytomatosis oncogene, N, Niard, Nird, RNCMYC                                                                                                                                                                                                                                                                                                                                                                                           |
| NACA         | AL022831, AL024382, alpha-NAC, D12Mgi4, Gm1878, HSD48, mKIAA0363, NACA1, NAC-alpha, NAC- $\alpha$ , Nascent polypeptide associated complex alpha chain, Nascent polypeptide-associated complex alpha polypeptide, nascent polypeptide associated complex subunit alpha, nascent polypeptide associated complex subunit $\alpha$ , Nascent polypeptide associated complex $\alpha$ chain, Nascent polypeptide-associated complex $\alpha$ polypeptide, sk, skNAC, $\alpha$ -NAC                                                                                 |
| NCK2         | 4833426I10RIK, GRB4, Grb, LOC100503894, NCK adaptor protein 2, Nck $\beta$ , NCKbe, NCKbeta, non-catalytic region of tyrosine kinase adaptor protein 2                                                                                                                                                                                                                                                                                                                                                                                                         |
| NFKB         | NF-kappa B, NF-k B, nuclear factor-kappa B, transcription factor nuclear factor kappa B                                                                                                                                                                                                                                                                                                                                                                                                                                                                        |
| NOS2         | CALCIUM-INDEPENDENT NOS, Hepatocyte NOS, HEP-NOS, Inducible NOS, INOS, LOC497963, MAC-NOS, N, nitric oxide synthase 2, nitric oxide synthase 2, inducible, No, NOS, NOS2A, NOS-II, similar to Nitric oxide synthase, inducible (NOS type II) (Inducible NO synthase) (Inducible NOS) (iNOS)                                                                                                                                                                                                                                                                    |
| PARVA        | 2010012A22RIK, 5430400F08RIK, act, Actopaxin, Actp, AI225929, alpha PARVIN, AU042898, CH-IL, CH-ILKBP, MXRA2, Parvin, Parvin-alpha, parvin, alpha, Parvin- $\alpha$ , parvin, $\alpha$ , $\alpha$ PARVIN                                                                                                                                                                                                                                                                                                                                                       |
| PARVB        | aff, affixin, AI595373, AW742462, CGI-56, D15Gsk, D15Gsk1, Parvin-beta, parvin, beta, Parvin- $\beta$ , parvin, $\beta$                                                                                                                                                                                                                                                                                                                                                                                                                                        |
| PDPK1        | 3'-PDK, 3-phosphoinositide dependent protein kinase-1, Pdk, PDK1, PDPK2, PDPK2P, PRO0461                                                                                                                                                                                                                                                                                                                                                                                                                                                                       |
| PI3K         | 1-phosphatidylinositol 3-kinase, 2.7.1.137, ATP:1-phosphatidyl-1D-myo-inositol 3-phosphotransferase, Phosphatidylinositol 3 kinase, phosphatidylinositol 3'-kinase, PI3-kinase, PtdIns 3 Kinase, type I phosphatidylinositol kinase, type III phosphoinositide 3-kinase, Vps34p                                                                                                                                                                                                                                                                                |
| PIP2         | 1,2-diacyl-sn-glycero-3-phospho-(1'-myo-inositol-4',5'-bisphosphate), 1-O-(3-sn-phosphatidyl)-1D-myo-inositol 4,5-bis(dihydrogen phosphate), 1-phosphatidyl-1D-myo-inositol 4,5-bisphosphate, C11H19O19P3R2                                                                                                                                                                                                                                                                                                                                                    |
| PIP3         | 1-phosphatidyl-1D-myo-inositol 3,4,5-trisphosphate, phosphatidylinositol 3,4,5-trisphosphate, phosphoinositide (3,4,5) P3, PI(3,4,5)P3, Plns(3,4,5)P3, PIP3, PtdIns(3,4,5)P3                                                                                                                                                                                                                                                                                                                                                                                   |
| PP2A         | protein PHOSPHATASE 2A, Protein Phosphatase Type2a                                                                                                                                                                                                                                                                                                                                                                                                                                                                                                             |
| PPP1R12A     | 1200015F06RIK, 5730577I22RIK, AA792106, AV099298, D10Erd625, D10Erd625e, GUBS, M110, M130, MBS, MBS130, MBSP, Mypt, MYPT1, protein phosphatase 1 regulatory subunit 12A, protein phosphatase 1, regulatory subunit 12A                                                                                                                                                                                                                                                                                                                                         |
| PPP1R14B     | AOM1, AOM172, FG-4095, P, PHI, PHI-1, Phospholipase c neighboring, PLC, PLCB3N, PNG, Protein phosphatase 1, protein phosphatase 1, protein phosphatase 1 regulatory inhibitor subunit 14B, protein phosphatase 1, regulatory (inhibitor) subunit 14B, protein phosphatase 1, regulatory inhibitor subunit 14B, SOM172                                                                                                                                                                                                                                          |
| PTEN         | 10q23del, 2310035O07RIK, A130070J02RIK, AI463227, B430203M17RIK, BZS, CWS1, DEC, GLM2, MHAM, MMAC, MMAC1, MUTATED IN MULTIPLE ADVANCED CANCERS, mutated in multiple advanced cancers 1, phosphatase and tensin homolog, PTEN1, PTENbeta, TEP, TEP1                                                                                                                                                                                                                                                                                                             |
| PTGS2        | COX, COX-2, CYCLO-OXYGENASE 2, GRIPGHS, hCox-2, hnCOX-2, INDUCIBLE CYCLOOXYGENASE, PES-2, PGG/HS, Pgh, PGHS, PGHS-2, PGH synthase 2, Pgi2 synthase, Pgs2, Pgsi, PHS, PHS-2, PHS II, Prostaglandin endoperoxide synthase 2, Tis, TIS10                                                                                                                                                                                                                                                                                                                          |
| PTK2         | FA, Fad, FADK, FADK 1, FAK, FAK1, FAK related non-kinase, FR, p125FAK, pp125FAK, PPP1R71, protein tyrosine kinase 2, PTK2 protein tyrosine kinase 2, TYROSINE KINASE 2                                                                                                                                                                                                                                                                                                                                                                                         |
| PXN          | AW108311, AW123232, FLJ23042, P, PAX, PAXILLIN                                                                                                                                                                                                                                                                                                                                                                                                                                                                                                                 |
| RHO          | GTPase Rho, Rho, Rho Family, RHO-GTPASE, Rho-like Gtpase                                                                                                                                                                                                                                                                                                                                                                                                                                                                                                       |
| RICTOR       | 4921505C17RIK, 6030405M08RIK, AVO3, AW492497, D530039E11RIK, hAVO3, KIAA1999, Mtorc2, PIA, RPTOR independent companion of MTOR complex 2, RPTOR independent companion of MTOR, complex 2                                                                                                                                                                                                                                                                                                                                                                       |
| RSU1         | LOC684929, R, Ras suppressor protein 1, rs, RSP-1, Rsul                                                                                                                                                                                                                                                                                                                                                                                                                                                                                                        |
| SNAI1        | AI194338, dJ710H13.1, S, SLUGH2, SNA, Sna1, SNAH, SNAIL, SNAIL1, snail family transcriptional repressor 1, snail family zinc finger 1                                                                                                                                                                                                                                                                                                                                                                                                                          |
| SNAI2        | S, Si, Siu, SLUG, SLUGH, SLUGH1, SNAIL2, snail family transcriptional repressor 2, snail family zinc finger 2, WS2D                                                                                                                                                                                                                                                                                                                                                                                                                                            |
| TESK1        | AI326901, p36-MBPk, testis associated actin remodelling kinase 1, testis specific protein kinase 1                                                                                                                                                                                                                                                                                                                                                                                                                                                             |
| TGFB11       | AR, ARA55, hic-, HIC-5, TGF beta 111, TGF $\beta$ 111, transforming growth factor beta 1 induced transcript 1, transforming growth factor $\beta$ 1 induced transcript 1, TSC-, TSC-5                                                                                                                                                                                                                                                                                                                                                                          |
| TMSB4        | TB4, THYMOSIN B4, Thymosin beta4, Thymosin $\beta$ 4, thymosin $\beta$ (4)                                                                                                                                                                                                                                                                                                                                                                                                                                                                                     |
| TNF          | AT-TNF, DI, DIF, RATTNF, TMTNF, Tn, TNF- $\alpha$ , TNF-alpha, Tnfs, Tnfs1a, TNFSF2, TNF- $\alpha$ , TNLG1F, tumor necrosis factor, Tumour Necrosis Factor $\alpha$ , tumor necrosis factor, $\alpha$ , tumour necrosis factor, tumour Necrosis Factor Alpha, tumour necrosis factor, alpha, tumour Necrosis Factor $\alpha$ , tumour necrosis factor, $\alpha$                                                                                                                                                                                                |
| TNFRSF1A     | CD120, CD120a, FFP, p5, p55, p55-R, p55 TNF alpha receptor, p55 TNF $\alpha$ receptor, p60, TBP1, TN, TNF-, TNF- $\alpha$ , TNFai, TNF-alphaR1, Tnf alpha receptor p60, TNFAR, TNF-R, TNF-R1, Tnfr-2, TNF-R55, TNFR60, TNF receptor 1, TNF receptor superfamily member 1A, TNF-R-I, TNFRp55, Tnf- $\alpha$ Receptor 2, Tnf $\alpha$ receptor p60, Tnf $\alpha$ Receptor Type1, Tnf- $\alpha$ receptor type 1, tumor necrosis factor receptor superfamily, member 1a, tumour necrosis factor receptor 1, tumour necrosis factor receptor superfamily, member 1a |
| VCL          | 9430097D22, AA571387, AI462105, AW545629, CMD1W, CMH15, HEL114, MV, MVCL, Vcl predicted, Vinculin                                                                                                                                                                                                                                                                                                                                                                                                                                                              |
| VIM          | PAL-E, Vimentin                                                                                                                                                                                                                                                                                                                                                                                                                                                                                                                                                |

## Pathway Analysis Using IPA Software; canonical pathway

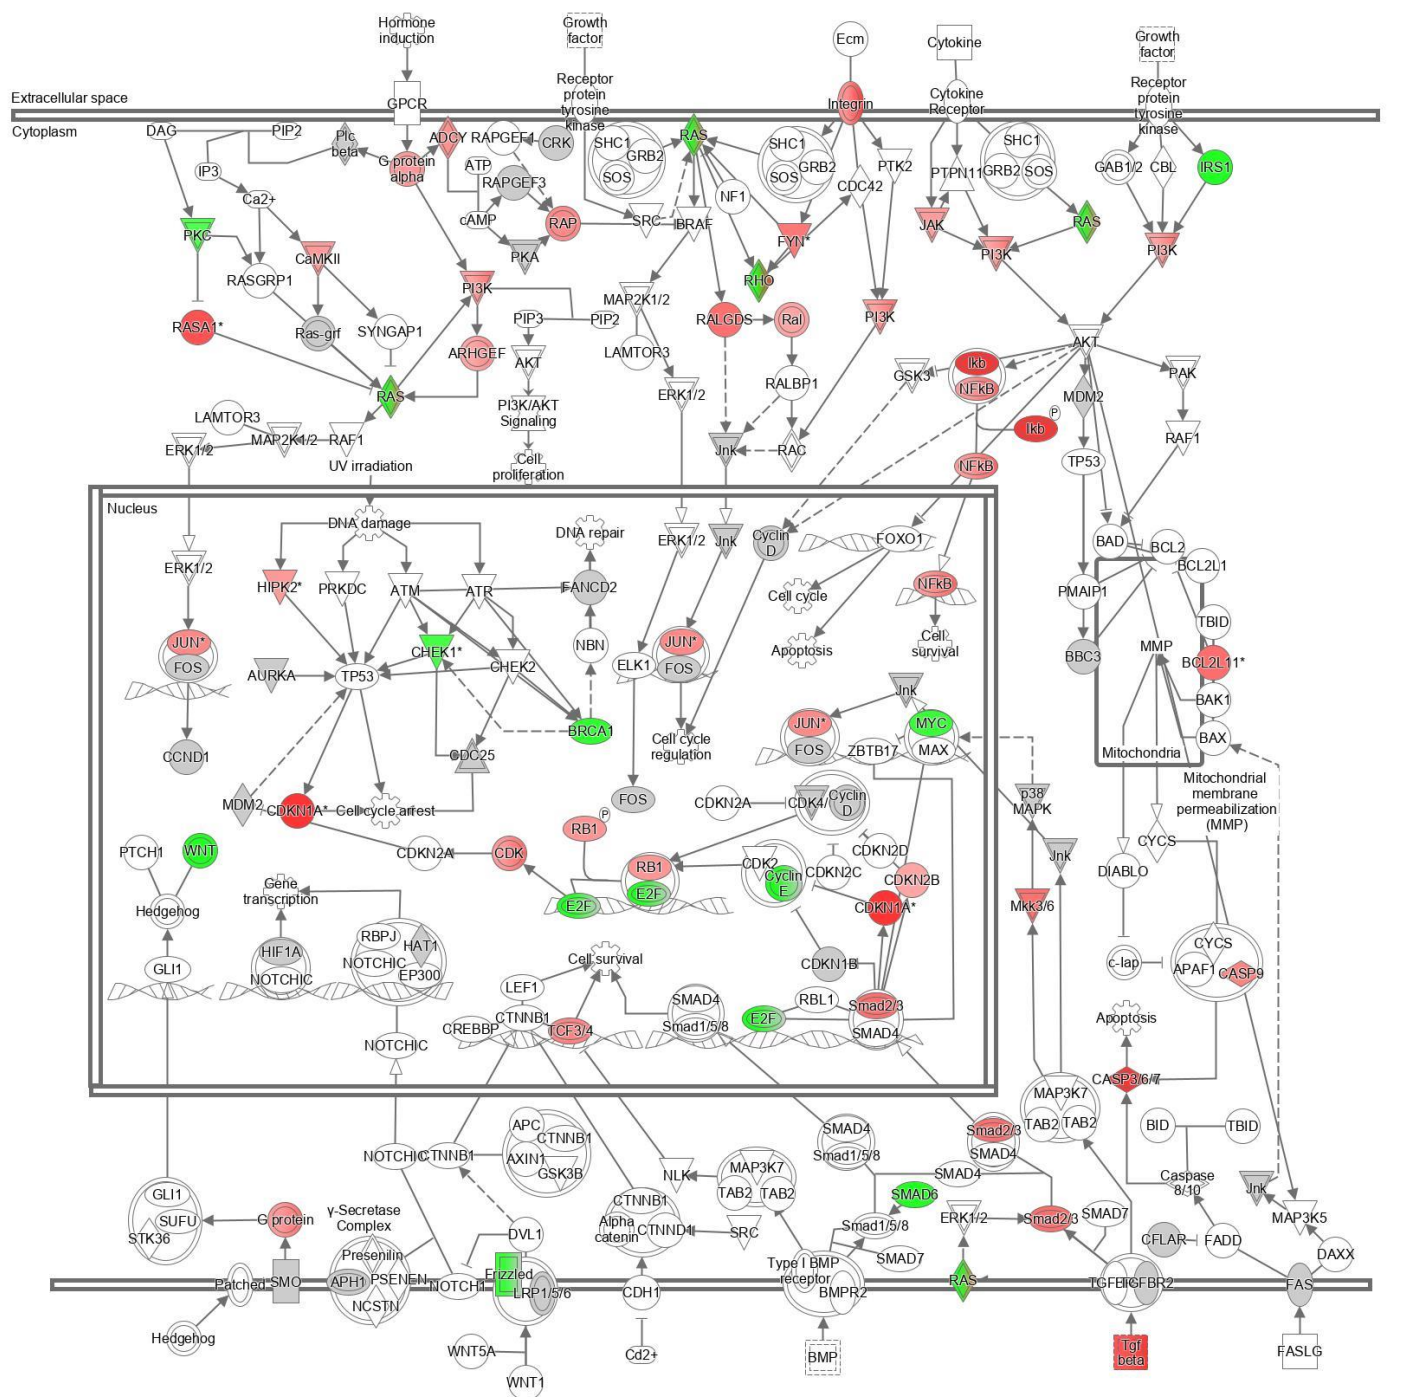

Figure S14. Molecular Mechanism of cancer at 6 h



Red: Increased, FDR<0.05 versus solvent control

Green: Decreased, FDR<0.05 versus solvent control

| Symbol                                     | Synonym(s)                                                                                                                                                                                                                                                                                                                                                                                                                                                                                                                                                                                                                                                                                                                    |
|--------------------------------------------|-------------------------------------------------------------------------------------------------------------------------------------------------------------------------------------------------------------------------------------------------------------------------------------------------------------------------------------------------------------------------------------------------------------------------------------------------------------------------------------------------------------------------------------------------------------------------------------------------------------------------------------------------------------------------------------------------------------------------------|
| ADCY                                       | 3',5'-cyclic AMP synthetase, 4.6.1.1, AC, Adenylate Cyclase, Adenyl Cyclase, Adenylyl cyclase, ATP diphosphate-lyase (cyclizing), mAC, sAC                                                                                                                                                                                                                                                                                                                                                                                                                                                                                                                                                                                    |
| AKT                                        | AKT1/2/3, B/Akt, PKB, RAC-PK                                                                                                                                                                                                                                                                                                                                                                                                                                                                                                                                                                                                                                                                                                  |
| Alphacatenin                               | CTNN alpha, CTNN $\alpha$ , $\alpha$ catenin                                                                                                                                                                                                                                                                                                                                                                                                                                                                                                                                                                                                                                                                                  |
| Ap1                                        | activator protein-1, c-Jun                                                                                                                                                                                                                                                                                                                                                                                                                                                                                                                                                                                                                                                                                                    |
| APAF1                                      | D630400I06RIK, Ap, Apaf1, apoptotic peptidase activating factor 1, CED4, fog, mKIAA0413                                                                                                                                                                                                                                                                                                                                                                                                                                                                                                                                                                                                                                       |
| APC                                        | A1047805, APC1, Apc7, APC (PROC), APC regulator of WNT signaling pathway, APC, WNT signaling pathway regulator, AU020952, AW124434, BTPS2, CC1, DESMD, DP2, DP2.5, DP3, Familial adenomatous polyposis, GS, M, mAPC, Min, PPP1R46, RATAPC                                                                                                                                                                                                                                                                                                                                                                                                                                                                                     |
| Apoptosome                                 | APAF1-Caspase 9-CytoC, apoptosis adaptor protein complex, Cytochrome C-APAF1-Caspase 9                                                                                                                                                                                                                                                                                                                                                                                                                                                                                                                                                                                                                                        |
| ARHGEF                                     | Ras GEF, RhOGEF                                                                                                                                                                                                                                                                                                                                                                                                                                                                                                                                                                                                                                                                                                               |
| ATM                                        | A1256621, AT1, ATA, ataxia telangiectasia mutated, ATC, ATD, ATDC, ATE, ATM serine/threonine kinase, C030026E19RIK, TEL1, TELO1                                                                                                                                                                                                                                                                                                                                                                                                                                                                                                                                                                                               |
| ATP                                        | [[[(2R,3S,4R,5R)-5-(6-aminopurin-9-yl)-3,4-dihydroxyoxolan-2-yl]]methoxy-hydroxyphosphoryl] phosphono hydrogen phosphate, 56-65-5, 9-beta-D-arabinofuranosyladenine 5'-triphosphate, 9-beta-D-arabinofuranosyladenine 5'-triphosphate, adenosine 5'-(tetrahydrogen triphosphate), adenosine 5'-triphosphate, ATP, ATP4-, C10H16N5O13P3                                                                                                                                                                                                                                                                                                                                                                                        |
| ATR                                        | ataxia telangiectasia and Rad3 related, Ataxia-telangiectasia-like, ATR serine/threonine kinase, FCTCS, FRP1, LOC100365674, LOC367198, LOC684113, MEC1, SCKL, SCKL1                                                                                                                                                                                                                                                                                                                                                                                                                                                                                                                                                           |
| AURKA                                      | AI, AIK, AIKR1, Ar, ARK-1, Au, AU019385, AURA, AURORA 2, AURORA A, AURORA KINASE, aurora kinase A, Aurora Related Kinase1, AW539821, Ayk, Ayk1, BTAk, I, IA, IAK, IAK1, PPP1R47, Stk, STK15, STK6, STK7                                                                                                                                                                                                                                                                                                                                                                                                                                                                                                                       |
| AXIN1                                      | AI316800, AXIN, AXIN form I, Fu, fused, Kb, Ki, kinky, knobbly, PPP1R49                                                                                                                                                                                                                                                                                                                                                                                                                                                                                                                                                                                                                                                       |
| BAD                                        | AI325008, Bad v1, Bad v2, BBC2, BCL2-associated agonist of cell death, BCL2L8                                                                                                                                                                                                                                                                                                                                                                                                                                                                                                                                                                                                                                                 |
| BAK1                                       | Ba, BAK, BAK-LIKE, BCL2-antagonist/killer 1, BCL2L7, CDN1, N-B, N-BAK1                                                                                                                                                                                                                                                                                                                                                                                                                                                                                                                                                                                                                                                        |
| BAX                                        | Bcl2-associated X, BCL2 associated X, apoptosis regulator, BCL2-associated X protein, BCL2L4                                                                                                                                                                                                                                                                                                                                                                                                                                                                                                                                                                                                                                  |
| BBG3                                       | BCL2 binding component 3, JFY-1, PU, PUMA, PUMA/JFY1                                                                                                                                                                                                                                                                                                                                                                                                                                                                                                                                                                                                                                                                          |
| BCL2                                       | AW986256, B cell leukaemia/lymphoma 2, B cell leukemia/lymphoma 2, Bcl-, Bcl2 alpha, BCL2 apoptosis regulator, BCL2, apoptosis regulator, Bcl2 $\alpha$ , C430015F12Rik, D630044D05RIK, D830018M01RIK, LOC100046608, ORF16, PPP1R50                                                                                                                                                                                                                                                                                                                                                                                                                                                                                           |
| BCL2L1                                     | bBclx1, Bcl, BCL2L BCL2-like 1, BCLX, Bcl-X beta, Bclx gamma, BCL-XL/S, Bcl-X $\beta$ , Bclx $\gamma$ , PPP1R52                                                                                                                                                                                                                                                                                                                                                                                                                                                                                                                                                                                                               |
| BCL2L11                                    | 1500006F24RIK, BAm, BCL2 like 11, BCL2-like 11 (apoptosis facilitator), Bi, BIM, Bo, BOD, BODL, LOC150819                                                                                                                                                                                                                                                                                                                                                                                                                                                                                                                                                                                                                     |
| BMP                                        | BMP3, BMP-3A, BONE MORPHOGENIC, Osteogenin                                                                                                                                                                                                                                                                                                                                                                                                                                                                                                                                                                                                                                                                                    |
| BMPR2                                      | 2610024H22RIK, AL117858, AW546137, BB189135, BM, BMP-, BMP-2, BMPR3, BMPR-II, BMR2, bone morphogenetic protein receptor type 2, bone morphogenetic protein receptor, type II (serine/threonine kinase), BRK-3, Gm20272, POVD1, PPH1, T-ALK, Type II bmp receptor                                                                                                                                                                                                                                                                                                                                                                                                                                                              |
| BRAF                                       | 9930012E13RIK, AA120551, AA387315, AA473386, AA47469, Bra, B-RAF1, Braf-2, B-Raf proto-oncogene, serine/threonine kinase, Braf transforming gene, C230098H17, C87398, D6Etd631, D6Eitd631e, NS7, RAFB, RAFB1                                                                                                                                                                                                                                                                                                                                                                                                                                                                                                                  |
| BRCA1                                      | BRCA1 DNA repair associated, BRCA1, DNA repair associated, BRCAI, BRCC1, breast cancer 1, early onset, BROVCA1, FANCS, PNCA4, PPP1R53, PSCP, RNF53                                                                                                                                                                                                                                                                                                                                                                                                                                                                                                                                                                            |
| c-lap                                      | IAP, NAIP                                                                                                                                                                                                                                                                                                                                                                                                                                                                                                                                                                                                                                                                                                                     |
| Ca2+                                       | 14127-61-8, Ca+2, calcium, calcium(2+), calcium cation, calcium citrate, calcium ion, calcium, ion (Ca2+), calcium ions, Citracal, tricalcium dicitrate                                                                                                                                                                                                                                                                                                                                                                                                                                                                                                                                                                       |
| CaMKII                                     | Ca2+/CALMODULIN DEPENDENT KINASE II, Ca+/calmodulin-dependent protein kinase ii, calmodulin-dependent protein kinase 2, Calmodulin Kinase II, CAMK2, CaM Kinase II, Ccdp k ii                                                                                                                                                                                                                                                                                                                                                                                                                                                                                                                                                 |
| cAMP                                       | 11002-78-1, 33116-15-3, 3',5'-cyclic AMP, 3',5'-monophosphate, adenosine cyclic, 37839-81-9, (4aR,6R,7R,7aS)-6-(6-aminopurin-9-yl)-2-hydroxy-2-oxo-4a,6,7,7a-tetrahydro-4H-furo[3,2-d][1,3,2]dioxaphosphinin-7-ol, 54532-48-8, 55576-98-2, 60-92-4, 60667-13-8, 68407-13-6, adenosine 3',5'-phosphate, adenosine, cyclic 3',5'-(hydrogen phosphate), adenosine cyclic 3,5 monophosphate, adenosine cyclic 3',5'-monophosphate, adenosine cyclic monophosphate, C10H12N5O6P, cAMP, cyclic-3',5'-monophosphate, adenosine, cyclic adenosine monophosphate, cyclic adenylic acid, cyclic AMP, disodium salt, cyclic AMP, monoammonium salt, cyclic AMP, monopotassium salt, cyclic AMP, monosodium salt, cyclic AMP, sodium salt |
| CASP3/6/7                                  | CASP3/6/7, Caspase 3, 6, 7, Caspase-3, -6, and -7                                                                                                                                                                                                                                                                                                                                                                                                                                                                                                                                                                                                                                                                             |
| CASP9                                      | AI115399, APAF3, AW493809, Casp, Casp9 v1, Caspase-9, ICE-, ICE-LAP6, MCH6, PPP1R56                                                                                                                                                                                                                                                                                                                                                                                                                                                                                                                                                                                                                                           |
| Caspase8/10                                | Casp8/10, Caspase 8,10                                                                                                                                                                                                                                                                                                                                                                                                                                                                                                                                                                                                                                                                                                        |
| CBL                                        | 4732447J05RIK, Casitas B-lineage lymphoma, CBL2, CBLA, Cbl proto-oncogene, Cbl ubiquitin ligase, C-Cb, C-CBL, FRA11B, LOC283153, NSLL, p120 Cbl, RGD1561386, RNF55                                                                                                                                                                                                                                                                                                                                                                                                                                                                                                                                                            |
| CNDN1                                      | AI327039, B-CELL CLL/LLYMPHOMA 1, bcl-, BCL1, cD1, CycD1, CYCLIN D1, Cyl-, Cyl-1, D11S287E, G1/S-Specific Cyclin D1, PR, PRAD1, U21B31                                                                                                                                                                                                                                                                                                                                                                                                                                                                                                                                                                                        |
| Cd2+                                       | 22537-48-0, cadmium(2+), cadmium acetate, cadmium cation, cadmium ion, cadmium, ion (Cd2+), Cd+2                                                                                                                                                                                                                                                                                                                                                                                                                                                                                                                                                                                                                              |
| CDC25                                      | mRNA encoding Cdc25-like                                                                                                                                                                                                                                                                                                                                                                                                                                                                                                                                                                                                                                                                                                      |
| CDC42                                      | AI747189, AU018915, CDC42Hs, cell division cycle 42, CELLULAR GROWTH REGULATING, G25K, TKS                                                                                                                                                                                                                                                                                                                                                                                                                                                                                                                                                                                                                                    |
| CDH1                                       | AA960649, ARC-1, BCDS1, cadherin 1, Cadherin E, CD324, CDHE, CSEIL, E-ca, ECAD, E-cadh, E-cadherin, L-C, L-CAM, Um, UVO, uvomorulin                                                                                                                                                                                                                                                                                                                                                                                                                                                                                                                                                                                           |
| CDK                                        | Cdks, cyclin-dependent kinase, Cyclin-Dependent Kinases, G1 CDK                                                                                                                                                                                                                                                                                                                                                                                                                                                                                                                                                                                                                                                               |
| CDK2                                       | A630093N05RIK, CDC2-RELATED KINASE, CDKN2, Cyclin A associated kinase, cyclin-dependent kinase 2, CYCLIN E ASSOCIATED KINASE, p33(CDK2)                                                                                                                                                                                                                                                                                                                                                                                                                                                                                                                                                                                       |
| CDK2-CyclinE                               | Cyclin E-CDK2                                                                                                                                                                                                                                                                                                                                                                                                                                                                                                                                                                                                                                                                                                                 |
| CDKN1A                                     | CAP, CAP20, CDK, CDK1, Cdkn, CDKN1, CDKN1A, Ci, CIP1, cyclin-dependent kinase inhibitor 1A, cyclin-dependent kinase inhibitor 1A (P21), mda, MDA-6, P2, P21, p21C, p21Cip, p21CIP1, p21W, p21WAF, p21Waf1, P21 Cyclin-Dependent Kinase Inhibitor, SD, SDI1, UV96, Waf, WAF1                                                                                                                                                                                                                                                                                                                                                                                                                                                   |
| CDKN1B                                     | AA408329, AI843786, Cdk1b, CDKN4, cyclin-dependent kinase inhibitor 1B, CYCLIN-DEPENDENT KINASE INHIBITOR P27, KIP1, MEN1B, MEN4, p2, p27, p27K, P27kip, P27KIP1, P28-ICK                                                                                                                                                                                                                                                                                                                                                                                                                                                                                                                                                     |
| CDKN2A                                     | A, Arf, ARF-INK4a, CDK4I, CDKN2, CMM2, CYCLIN-DEPENDENT KINASE INHIBITOR 2A, INK4, INK4A, INK4a-ARF, Ink4a/Arf, MLM, MTS, MTS-1, p1, p14ARF/p16INK4a, p16, p16/ARF, p16Cdkn2a, p16l, p16 INK4, p16l INK4a, P19, p19ARF, Pct, PCTR1, TP16                                                                                                                                                                                                                                                                                                                                                                                                                                                                                      |
| CDKN2B                                     | AV083695, CDK4I, cyclin-dependent kinase inhibitor 2B, INK4B, MTS, MTS2, p1, P15, p15IN, p15INK4, p15INK4b, p15(INK4b)                                                                                                                                                                                                                                                                                                                                                                                                                                                                                                                                                                                                        |
| CDKN2C                                     | C77269, CDKN6, cyclin-dependent kinase inhibitor 2C, INK, INK4C, p1, p18, p18IN, p18-INK4C, p18-INK6                                                                                                                                                                                                                                                                                                                                                                                                                                                                                                                                                                                                                          |
| CDKN2D                                     | cyclin dependent kinase inhibitor 2D, INK, INK4D, p1, p19, p19IN, p19-INK4D                                                                                                                                                                                                                                                                                                                                                                                                                                                                                                                                                                                                                                                   |
| CFLAR                                      | 2310024N18RIK, AA30105C05RIK, AU021929, Ca, CASH, CASP8 and FADD-like apoptosis regulator, CASP8AP1, Caspase 8 associated, Casper, c-F, c-FLIP, CLARP, F, FLAME, FLAME-1, FLICE-LIKE IP, FLIP, Gm9845, I-FLICE, LOC102724614, MRIT                                                                                                                                                                                                                                                                                                                                                                                                                                                                                            |
| CHEK1                                      | C85740, checkpoint kinase 1, CHK1, rad27                                                                                                                                                                                                                                                                                                                                                                                                                                                                                                                                                                                                                                                                                      |
| CHEK2                                      | CDS1, Check2, checkpoint kinase 2, CHK2, hCds1, HUcDS1, LFS2, PP1425, Rad, RAD53                                                                                                                                                                                                                                                                                                                                                                                                                                                                                                                                                                                                                                              |
| CREBBP                                     | AW558298, CB, CBP, CBP/p300, CREB binding protein, KAT, KAT3A, MKHK1, p300/CBP, RSTS, RSTS1, RTS                                                                                                                                                                                                                                                                                                                                                                                                                                                                                                                                                                                                                              |
| CRK                                        | c-Crk, c-Crk2, Cr, CRK2, Crko, CRK proto-oncogene, adaptor protein, FLJ11558, p38, v-crk avian sarcoma virus CT10 oncogene homolog                                                                                                                                                                                                                                                                                                                                                                                                                                                                                                                                                                                            |
| CTNNB1                                     | armadillo, Beta-cat, beta CATEENIN, Bfc, Cat, CATEENIN beta, catenin beta 1, catenin (cadherin associated protein), beta 1, catenin (cadherin associated protein), $\beta$ 1, CATEENIN $\beta$ , catenin $\beta$ 1, CATNB, CTNB1, CTNNB, CTNN beta, CTNN $\beta$ , EVR7, Mesc, MRD19, NEDSDV, $\beta$ -cat, $\beta$ -catenin                                                                                                                                                                                                                                                                                                                                                                                                  |
| CTNND1                                     | AA409437, AU019353, BCDS2, Ca, Cas, catenin (cadherin associated protein), delta 1, catenin (cadherin associated protein), $\delta$ 1, catenin delta 1, catenin $\delta$ 1, CATNS, Ctn, CTNN, CTNN delta, CTNN delta1, CTNN $\delta$ , CTNN $\delta$ , mKIAA0384, P12, P120, P120CAS, p120(CAS), p120-Catenin, P120CTN, p120(CTN), Pp120                                                                                                                                                                                                                                                                                                                                                                                      |
| CTNN $\alpha$ -CTNN $\beta$ -CTNN $\delta$ | CTNNalpha-CTNNbeta-CTNNdelta                                                                                                                                                                                                                                                                                                                                                                                                                                                                                                                                                                                                                                                                                                  |
| CyclinD                                    | CycD, Cyclin D1                                                                                                                                                                                                                                                                                                                                                                                                                                                                                                                                                                                                                                                                                                               |
| CYCS                                       | CYC, CYCSA, CYTC, CYTOC, CYTOCHROME C, cytochrome c, somatic, cytochrome c, somatic-like, ENSMUSG0000058927, HCS, LOC100363502, THC4, X laevis XLCL2                                                                                                                                                                                                                                                                                                                                                                                                                                                                                                                                                                          |
| DAG                                        | DAG, diacylglycerides, diglyceride                                                                                                                                                                                                                                                                                                                                                                                                                                                                                                                                                                                                                                                                                            |
| DAXX                                       | BING2, DAP6, death-domain associated protein, EAP1, Fas death domain-associated protein, PML ASSOCIATED FACTOR                                                                                                                                                                                                                                                                                                                                                                                                                                                                                                                                                                                                                |
| DIABLO                                     | 0610041G12RIK, 1700006L01RIK, AU040403, DFNA64, diablo IAP-binding mitochondrial protein, diablo, IAP-binding mitochondrial protein, Sm, SMAC                                                                                                                                                                                                                                                                                                                                                                                                                                                                                                                                                                                 |
| DVL1                                       | DISHEVELED, dishevelled segment polarity protein 1, DRS2, DSH, DVL, DVL1L1, DVL1P1, mKIAA4029                                                                                                                                                                                                                                                                                                                                                                                                                                                                                                                                                                                                                                 |
| ELK1                                       | ELK, ELK1, member of ETS oncogene family, ETS transcription factor ELK1, p62TCF, RGD:2549, TCF/ELK                                                                                                                                                                                                                                                                                                                                                                                                                                                                                                                                                                                                                            |
| EP300                                      | A430090G16, A730011L11, E1A binding protein p300, KAT3, KAT3B, MKHK2, p30, p300, p300 HAT, RSTS2                                                                                                                                                                                                                                                                                                                                                                                                                                                                                                                                                                                                                              |
| ERK1/2                                     | MAPK p44/42, MAPK p44/p42, p42/44 mapk, P42/p44 erk, P42/p44 mapk, p42/p44 MAP KINASE                                                                                                                                                                                                                                                                                                                                                                                                                                                                                                                                                                                                                                         |
| FADD                                       | DEATH domain-containing ADAPTOR, Fas associated via death domain, Fas (TNFRSF6)-associated via death domain, GIG3, MORT1, Mort1/F, Mort1/FADD                                                                                                                                                                                                                                                                                                                                                                                                                                                                                                                                                                                 |
| FANCD2                                     | 2410150007RIK, AU015151, BB137857, FA4, FACD, FA complementation group D2, FAD, FA-D2, FANCD, Fanconi anaemia, complementation group D2, Fanconi anemia, complementation group D2                                                                                                                                                                                                                                                                                                                                                                                                                                                                                                                                             |
| FAS                                        | AI196731, ALPS1A, AP, APO-1, APT1, CD95, CD95L, CD95 receptor, FAS1, FAS/APO1, Fas cell surface death receptor, FasR, FASTM, Fas (TNF receptor superfamily member 6), lpr, Receptor for Fas Ligand, Receptors for Fas Ligand, TNF, Tnfr, TNFR6, Tnf receptor member 6, TNFRSF6                                                                                                                                                                                                                                                                                                                                                                                                                                                |
| FASLG                                      | ALPS1B, APT1, APT1LG1, APTL, CD178, CD95, CD95-L, F, Fa, FASL, Fas Ligand, Fas ligand (TNF superfamily, member 6), gld, mFasL, Tnfr6, Tnfs, TNFSF6, TNLG1A                                                                                                                                                                                                                                                                                                                                                                                                                                                                                                                                                                    |
| FOS                                        | AP-1, c-F, C-FOS, D12Rfj, D12Rfj, FBJ osteosarcoma oncogene, Fos proto-oncogene, AP-1 transcription factor subunit, p55                                                                                                                                                                                                                                                                                                                                                                                                                                                                                                                                                                                                       |
| FOXO1                                      | Afx, Afxh, AI876417, FKX, FKX1, FKHR, FKHR1, Forkhead, forkhead box O1, Fox, FOXO1A                                                                                                                                                                                                                                                                                                                                                                                                                                                                                                                                                                                                                                           |
| Frizzled                                   | Frizzled receptor, FZ, FZD, Wnt receptor                                                                                                                                                                                                                                                                                                                                                                                                                                                                                                                                                                                                                                                                                      |
| Frizzled-LRP                               | FZD-LRP1/5/6                                                                                                                                                                                                                                                                                                                                                                                                                                                                                                                                                                                                                                                                                                                  |
| FYN                                        | AI448320, AW552119, C-FYN, Fyn proto-oncogene, FYN proto-oncogene, Src family tyrosine kinase, FYNT, LOC102724705, p59-FYN, p59 Fyn B, SLK, SRC-LIKE KINASE, SYN                                                                                                                                                                                                                                                                                                                                                                                                                                                                                                                                                              |
| G protein                                  | Galphabeta-gamma, Galpha-Gbeta-Ggamma, Galphai-Gbeta-Ggamma, Galphaq-Gbeta-Ggamma, Gpro, G protein alpha beta gamma, G protein alpha-G protein beta-GDP-G protein gamma, G protein alpha-G protein beta-G protein gamma, G-protein complex, G protein $\alpha$ -G protein $\beta$ -GDP-G protein $\gamma$ , G protein $\alpha$ -G protein $\beta$ -G protein $\gamma$ , G-protein $\alpha$ - $\beta$ - $\gamma$ , Guanine nucleotide binding protein, Ga-G $\beta$ -G $\gamma$ , Gai-G $\beta$ -G $\gamma$ , Gaq-G $\beta$ -G $\gamma$ , Go $\beta$                                                                                                                                                                           |
| G proteinalpha                             | Galpha, G-Protein Alpha Subunit, G protein $\alpha$ , G-Protein $\alpha$ Subunit, Ga                                                                                                                                                                                                                                                                                                                                                                                                                                                                                                                                                                                                                                          |
| Gammasecretase                             | Gamma Secretase, Secretase $\gamma$ , $\gamma$ -Secretase                                                                                                                                                                                                                                                                                                                                                                                                                                                                                                                                                                                                                                                                     |
| GLI1                                       | AV235269, GL1, GLI, GLI family zinc finger 1, GLI-Kruppel family member GLI1, PAPA8, PPD1, Zfp-, ZFP5                                                                                                                                                                                                                                                                                                                                                                                                                                                                                                                                                                                                                         |
| GRB2                                       | AA408164, ASH, Ash-psi, EGFRBP-GRB2, GRAB2, GRBS, growth factor receptor bound protein 2, MST084, MSTP084, NCKAP2                                                                                                                                                                                                                                                                                                                                                                                                                                                                                                                                                                                                             |
| Grb2-Shc1-Sos                              | Grb2-Sos-Shc, SHC-GRB2-SOS                                                                                                                                                                                                                                                                                                                                                                                                                                                                                                                                                                                                                                                                                                    |
| GSK3                                       | Glycogen synthase kinase, Gsk, GSK3 alpha/beta, GSK3 $\alpha/\beta$                                                                                                                                                                                                                                                                                                                                                                                                                                                                                                                                                                                                                                                           |
| GSK3beta-Axin-APC-CTnnbeta                 | APC-CTNNbeta-AXIN-GSK3beta, APC-CTNN $\beta$ -AXIN-GSK3 $\beta$ , AXIN-APC-GSKbeta-CTNNbeta, AXIN-APC-GSK $\beta$ -CTNN $\beta$ , GSK3 $\beta$ -AXIN-APC-CTNN $\beta$                                                                                                                                                                                                                                                                                                                                                                                                                                                                                                                                                         |
| GSK3B                                      | 7330414F15RIK, 8430431H08RIK, C86142, glycogen synthase kinase 3 beta, glycogen synthase kinase 3 $\beta$ , GSK-, GSK-3, GSK-3be, GSK-3beta, GSK-3 $\beta$ , GSKbeta, GSK $\beta$ , Tpk1                                                                                                                                                                                                                                                                                                                                                                                                                                                                                                                                      |
| HAT1                                       | 2410071B14RIK, AA536933, histone acetyltransferase 1, histone aminotransferase 1, KAT, KAT1                                                                                                                                                                                                                                                                                                                                                                                                                                                                                                                                                                                                                                   |
| Hedgehog                                   | Hh                                                                                                                                                                                                                                                                                                                                                                                                                                                                                                                                                                                                                                                                                                                            |
| HIF1A                                      | AA959795, bHLHe7, bHLHe78, HIF-1, HIF1-ALPHA, HIF-1alpha (hydroxylated), HIF-1 $\alpha$ , HIF-1 $\alpha$ (hydroxylated), Hypoxia inducible factor 1 alpha subunit, hypoxia inducible factor 1, alpha subunit, hypoxia inducible factor 1 subunit alpha, hypoxia inducible factor 1 subunit $\alpha$ , Hypoxia inducible factor 1 $\alpha$ subunit, hypoxia inducible factor 1, $\alpha$ subunit, MO, MOP1, PASD8                                                                                                                                                                                                                                                                                                              |

| Symbol                         | Synonym(s)                                                                                                                                                                                                                                                                                                                                                                                                                                                                                                                                                                                                                                                                                                                                      |
|--------------------------------|-------------------------------------------------------------------------------------------------------------------------------------------------------------------------------------------------------------------------------------------------------------------------------------------------------------------------------------------------------------------------------------------------------------------------------------------------------------------------------------------------------------------------------------------------------------------------------------------------------------------------------------------------------------------------------------------------------------------------------------------------|
| HIF1alpha-NICD                 | HIF1α-NICD                                                                                                                                                                                                                                                                                                                                                                                                                                                                                                                                                                                                                                                                                                                                      |
| HIPK2                          | 1110014020RIK, B230339E18RIK, homeodomain interacting protein kinase 2, LOC100505582, LOC653052, PRO0593, St, Stank                                                                                                                                                                                                                                                                                                                                                                                                                                                                                                                                                                                                                             |
| Ikb                            | I KAPPA B, Ikbeta, Ikb, Ik-B                                                                                                                                                                                                                                                                                                                                                                                                                                                                                                                                                                                                                                                                                                                    |
| Ikb-NfkB                       | IkappaB-NFkappaB, Ikb-NFkB, NFkB-IkB                                                                                                                                                                                                                                                                                                                                                                                                                                                                                                                                                                                                                                                                                                            |
| Integrin                       | Integrin alpha-beta, integrin-extracellular matrix, INTEGRIN receptor, Integrin α-β                                                                                                                                                                                                                                                                                                                                                                                                                                                                                                                                                                                                                                                             |
| IP3                            | 27121-73-9, inositol trisphosphate, IP3, myo-inositol, tris(dihydrogen phosphate)                                                                                                                                                                                                                                                                                                                                                                                                                                                                                                                                                                                                                                                               |
| IRS1                           | ENSMUSG00000022591, G972, G972R, HIRS-1, insulin receptor substrate 1, IR, IRS1IRM                                                                                                                                                                                                                                                                                                                                                                                                                                                                                                                                                                                                                                                              |
| JAK                            | JAK kinase                                                                                                                                                                                                                                                                                                                                                                                                                                                                                                                                                                                                                                                                                                                                      |
| Jnk                            | JNK 54/46, Jnk p56, JNK/SAPK, JUN KINASE, p40, p47, Sapk/Jnk                                                                                                                                                                                                                                                                                                                                                                                                                                                                                                                                                                                                                                                                                    |
| JUN                            | Activator protein 1, AP-1, AP1, c-ju, cJUN, Junc, jun proto-oncogene, Jun proto-oncogene, AP-1 transcription factor subunit, LOC100288387, LOC100291417, LOC100293034, p39, v-Jun, V-jun Avian Sarcoma Virus 17 Oncogene Homolog, V-jun Sarcoma Virus 17 Oncogene Homolog                                                                                                                                                                                                                                                                                                                                                                                                                                                                       |
| LAMTOR3                        | AW556229, late endosomal/lysosomal adaptor, MAPK and MTOR activator 3, LOC100132990, Map, Map2k, MAP2K1IP1, MAPBP, MAPKSP1, Mek binding partner 1, Mp, MP1, PRO0633, Regulator3                                                                                                                                                                                                                                                                                                                                                                                                                                                                                                                                                                 |
| LEF1                           | 3000002B05, A1451430, Lef-, lymphoid enhancer binding factor 1, TCF10, TCF1ALPHA, TCF7L3, TCF/LEF                                                                                                                                                                                                                                                                                                                                                                                                                                                                                                                                                                                                                                               |
| MAP2K1/2                       | MEK1/2, MKK1/2                                                                                                                                                                                                                                                                                                                                                                                                                                                                                                                                                                                                                                                                                                                                  |
| MAP3K5                         | 7240542D20Rik, A, APOPTOSIS SIGNAL REGULATED KINASE 1, AS, ASK, ASK1, M3K5, MAPKKK5, MEKK5, mitogen-activated protein kinase kinase kinase 5, RGD1306565                                                                                                                                                                                                                                                                                                                                                                                                                                                                                                                                                                                        |
| MAP3K7                         | CSCF, FMD2, Map3k7 predicted, MEKK7, mitogen-activated protein kinase kinase kinase 7, TAK1, TGF1a, tgf β activated kinase 1                                                                                                                                                                                                                                                                                                                                                                                                                                                                                                                                                                                                                    |
| Map3k7-Map3k7ip1-              | Tab1-Tab2-Tak1                                                                                                                                                                                                                                                                                                                                                                                                                                                                                                                                                                                                                                                                                                                                  |
| MAX                            | AA960152, A1875693, bHLHd, bHLHd4, bHLHd5, bHLHd6, bHLHd7, bHLHd8, Max protein, MYC associated factor X, Myn                                                                                                                                                                                                                                                                                                                                                                                                                                                                                                                                                                                                                                    |
| Max-Myc                        | cMyc-MAX, Myc-MAX                                                                                                                                                                                                                                                                                                                                                                                                                                                                                                                                                                                                                                                                                                                               |
| MDM2                           | 1700007J15Rik, AA415488, ACTFS, hdm2, HDMX, LSKB, MDM2-A1, MDM2 proto-oncogene, MGC5370, Transformed 3T3 cell double minute 2, transformed mouse 3T3 cell double minute 2                                                                                                                                                                                                                                                                                                                                                                                                                                                                                                                                                                       |
| Mkk3/6                         | MEK3/6, Mkk3/6 (mitogen activated protein kinase kinase 3/6), MKK3/MKK6                                                                                                                                                                                                                                                                                                                                                                                                                                                                                                                                                                                                                                                                         |
| MYC                            | AU016757, bHLHe3, bHLHe39, CMYC, C-MYC-P64, mMyc, MRTL, Myc2, MYCC, MYC proto-oncogene, bHLH transcription factor, myelocytomatosis oncogene, N, Niard, Nird, RNCMYC                                                                                                                                                                                                                                                                                                                                                                                                                                                                                                                                                                            |
| NBN                            | ATV, AT-V1, AT-V2, Nb, NBS, NBS1, NIBRIN, P95                                                                                                                                                                                                                                                                                                                                                                                                                                                                                                                                                                                                                                                                                                   |
| NCSTN                          | 9430068N19Rik, AA727311, APH2, ATAG1874, D1Dau13, D1Dau13e, Kiaa0253, mKIAA0253, Nc, NCT, ni, NICASTRIN                                                                                                                                                                                                                                                                                                                                                                                                                                                                                                                                                                                                                                         |
| NF1                            | AW494271, Dsk, Dsk9, E030030H24RIK, LOC646021, Mhdads, MhdadsK9, Neurofibromatosis 1, NEUROFIBROMIN, neurofibromin 1, Nf-, NF1-GAP, NFNS, VRNF, WSS                                                                                                                                                                                                                                                                                                                                                                                                                                                                                                                                                                                             |
| NFkB                           | NF-KAPPA B, NF-κ B, nuclear factor-κ b, transcription factor nuclear factor κ b                                                                                                                                                                                                                                                                                                                                                                                                                                                                                                                                                                                                                                                                 |
| NLK                            | A1194375, LOC100044468, nemo like kinase, RGD1561602                                                                                                                                                                                                                                                                                                                                                                                                                                                                                                                                                                                                                                                                                            |
| NOTCH1                         | 9930111A19Rik, AOS5, AOVd1, hN1, lin, lin-12, Mi, Mis6, N, N1, NOTCH1, notch receptor 1, Ta, TAN1                                                                                                                                                                                                                                                                                                                                                                                                                                                                                                                                                                                                                                               |
| p38MAPK                        | P38, p38 MAP KINASE, P38 MITOGEN-ACTIVATED protein KINASE                                                                                                                                                                                                                                                                                                                                                                                                                                                                                                                                                                                                                                                                                       |
| Patched                        | PTC, PTCH                                                                                                                                                                                                                                                                                                                                                                                                                                                                                                                                                                                                                                                                                                                                       |
| PI3K                           | 1-phosphatidylinositol 3-kinase, 2.7.1.137, ATP:1-phosphatidyl-1D-myo-inositol 3-phosphotransferase, Phosphatidylinositol 3 kinase, phosphatidylinositol 3'-kinase, PI3-kinase, PtdIns 3 Kinase, type III phosphoinositide 3-kinase, type I phosphatidylinositol kinase, Vps34p                                                                                                                                                                                                                                                                                                                                                                                                                                                                 |
| PIP2                           | 1,2-diacyl-sn-glycero-(1'-myo-inositol-4',5'-bisphosphate), 1-O-(3-sn-phosphatidyl)-1D-myo-inositol 4,5-bis(dihydrogen phosphate), 1-phosphatidyl-1D-myo-inositol 4,5-bisphosphate, C11H19O19P3R2                                                                                                                                                                                                                                                                                                                                                                                                                                                                                                                                               |
| PIP3                           | 1-phosphatidyl-1D-myo-inositol 3,4,5-trisphosphate, phosphatidylinositol 3,4,5-trisphosphate, phosphoinositide (3,4,5) P3, PI(3,4,5)P3, Plns(3,4,5)P3, PIP3, PtdIns(3,4,5)P3                                                                                                                                                                                                                                                                                                                                                                                                                                                                                                                                                                    |
| PKA                            | A-Kinase, cAMP-Dependent Protein Kinase, cyclic AMP depended protein kinase, protein KINASE A                                                                                                                                                                                                                                                                                                                                                                                                                                                                                                                                                                                                                                                   |
| PKC                            | Cnpkc, PKC, Pkc(s), Protein Kinase C                                                                                                                                                                                                                                                                                                                                                                                                                                                                                                                                                                                                                                                                                                            |
| Plcbeta                        | Phospholipase c beta, Phospholipase C β, PLCB, PLCβ                                                                                                                                                                                                                                                                                                                                                                                                                                                                                                                                                                                                                                                                                             |
| PMAIP1                         | APR, N, NOXA, phorbol-12-myristate-13-acetate-induced protein 1                                                                                                                                                                                                                                                                                                                                                                                                                                                                                                                                                                                                                                                                                 |
| Presenilin                     | PS, PS1/2, PSEN1/2                                                                                                                                                                                                                                                                                                                                                                                                                                                                                                                                                                                                                                                                                                                              |
| PRKDC                          | A1326420, AU019811, DNA-, DNA-DEPENDENT protein KINASE, DNAPDCs, DNAPK, DNA-PKC, DNA-PKcs, DNPK1, DOX, DOXNPH, dxn, dxnph, HYRC, HYRC1, IMD26, p350, p460, Prkdc predicted, protein kinase, DNA activated, catalytic polypeptide, protein kinase, DNA-activated, catalytic subunit, scid, slip, XRCC, XRCC7                                                                                                                                                                                                                                                                                                                                                                                                                                     |
| PSENE1                         | 1700023M09RIK, ACNIN2, MDS033, MSTP064, PEN-2, presenilin enhancer gamma secretase subunit, presenilin enhancer, gamma-secretase subunit, presenilin enhancer γ secretase subunit, presenilin enhancer, γ-secretase subunit, RGD1312037                                                                                                                                                                                                                                                                                                                                                                                                                                                                                                         |
| PTCH1                          | A230106A15RIK, BCNS, mes, NBCCS, patched 1, Pt, PTC, PTC1, PTCH, Ptch2, wi, wig                                                                                                                                                                                                                                                                                                                                                                                                                                                                                                                                                                                                                                                                 |
| PTK2                           | FA, Fad, FADK, FADK 1, FAK, FAK1, FAK related non-kinase, FR, p125FAK, pp125FAK, PPP1R71, protein tyrosine kinase 2, PTK2 protein tyrosine kinase 2, TYROSINE KINASE 2                                                                                                                                                                                                                                                                                                                                                                                                                                                                                                                                                                          |
| PTPN11                         | 2700084A17Rik, AW536184, BPTP3, CFC, JMML, METCDS, MGC14433, Noonan syndrome 1, NS1, protein tyrosine phosphatase non-receptor type 11, protein tyrosine phosphatase, non-receptor type 11, PTP, PTP-1D, PTP2C, S, SAP-2, Sh, SH-P, SHP-2, SH-PTP2, SH-PTP3, Src homology protein 2, SYP                                                                                                                                                                                                                                                                                                                                                                                                                                                        |
| RAF1                           | 6430402F14RIK, AA990557, BB129353, CMD1NN, c-R, Cra, CRAF, Craf1, D830050J10RIK, leukaemia ONCOGENE HOMOLOG1, LEUKEMIA ONCOGENE HOMOLOG1, NS5, Raf-1 proto-oncogene, serine/threonine kinase, v-, v-Raf, v-raf-leukaemia viral oncogene 1, v-raf-leukemia viral oncogene 1                                                                                                                                                                                                                                                                                                                                                                                                                                                                      |
| Ral                            | Ral A/B                                                                                                                                                                                                                                                                                                                                                                                                                                                                                                                                                                                                                                                                                                                                         |
| RALBP1                         | DNP-SG ATPase, R, ralA binding protein 1, Ral GAP, Rik, RIP1, RL, RLIP1, RLIP76                                                                                                                                                                                                                                                                                                                                                                                                                                                                                                                                                                                                                                                                 |
| RALGDS                         | Gn, Gnds, Hs.560937, mKIAA1308, Ra, RalGDSB, RalGEF, ral guanine nucleotide dissociation stimulator, Rg, RGDS, RGF                                                                                                                                                                                                                                                                                                                                                                                                                                                                                                                                                                                                                              |
| RAPGEF1                        | 4932418O06RIK, C3G, C3G-1, C3G-2, Grf, GRF2, Rap guanine nucleotide exchange factor 1, Rap guanine nucleotide exchange factor (GEF) 1                                                                                                                                                                                                                                                                                                                                                                                                                                                                                                                                                                                                           |
| RAPGEF3                        | 2310016P22RIK, 9330170P05RIK, bcm910, CAMP-GEFI, CGEF1, Epa, EPAC, EPAC1, HSU79275, Rap guanine nucleotide exchange factor 3, Rap guanine nucleotide exchange factor (GEF) 3                                                                                                                                                                                                                                                                                                                                                                                                                                                                                                                                                                    |
| Ras-grf                        | Guanine Nucleotide Releasing                                                                                                                                                                                                                                                                                                                                                                                                                                                                                                                                                                                                                                                                                                                    |
| RASA1                          | CM-AVM, CMAVM1, G, GAP, GAPX, p120-, p120GAP, P120RASGAP, PKWS, RASA, RASGAP, RAS p21 protein activator 1                                                                                                                                                                                                                                                                                                                                                                                                                                                                                                                                                                                                                                       |
| RASGRP1                        | CALDAG-GEFI, CALDAG-GEFII, IMD64, RASGRP, RAS guanyl releasing protein 1                                                                                                                                                                                                                                                                                                                                                                                                                                                                                                                                                                                                                                                                        |
| Rb-E2Ftranscription repression | Rb1-E2F1, Rb-E2F, Rb-E2F1                                                                                                                                                                                                                                                                                                                                                                                                                                                                                                                                                                                                                                                                                                                       |
| RB1                            | OSRC, p, p105, p105-Rb, p110 RB, p110-RB1, pp105, pp110, PPP1R130, pRb, R, RB, RB-ASSOCIATED, RB transcriptional corepressor 1, Retinoblastome tumor-suppression protein rb                                                                                                                                                                                                                                                                                                                                                                                                                                                                                                                                                                     |
| RBL1                           | AW547426, CP107, LOC683869, p10, p107, PRB1, RB transcriptional corepressor like 1                                                                                                                                                                                                                                                                                                                                                                                                                                                                                                                                                                                                                                                              |
| RBPJ                           | A1843960, AOS3, CBF-1, csl, Igg, Iggj, IGKJRB, IGKJRB1, Igkrsbp, KBF2, RBP, RBP 2N, RBP-JK, RBP-J kappa, RBP-J κ, RBPSUH, Rbpuh1, Recombination signal binding, recombination signal binding protein for immunoglobulin kappa J region, recombination signal binding protein for immunoglobulin κ J region, SUH                                                                                                                                                                                                                                                                                                                                                                                                                                 |
| RHO                            | GTPase Rho, Rho, Rho Family, RHO-GTPASE, Rho-like Gtpase                                                                                                                                                                                                                                                                                                                                                                                                                                                                                                                                                                                                                                                                                        |
| SHC1                           | p52SHC, p6, p66, p66s, P66shc, Sh, SHC, Shc (46 kDa isoform), SHCA, SHC adaptor protein 1, Shc p66 isoform, src homology 2 domain-containing transforming protein C1                                                                                                                                                                                                                                                                                                                                                                                                                                                                                                                                                                            |
| Smad1/5/8                      | SMAD1/5/8                                                                                                                                                                                                                                                                                                                                                                                                                                                                                                                                                                                                                                                                                                                                       |
| Smad1/5/8-Smad2/3-             | SMAD 1,4,5,8                                                                                                                                                                                                                                                                                                                                                                                                                                                                                                                                                                                                                                                                                                                                    |
| Smad2/3-                       | Smad 2/3/4                                                                                                                                                                                                                                                                                                                                                                                                                                                                                                                                                                                                                                                                                                                                      |
| SMAD4                          | AW743858, D18Wsu70, D18Wsu70e, DPC, DPC4, J1P, Madh, MADH4, MYHRS, SMAD family member 4, Smaug1                                                                                                                                                                                                                                                                                                                                                                                                                                                                                                                                                                                                                                                 |
| SMAD6                          | AOVD2, b2b390C, b2b390C1o, HsT17432, Madh, MADH6, MADH7, SMAD family member 6                                                                                                                                                                                                                                                                                                                                                                                                                                                                                                                                                                                                                                                                   |
| SMAD7                          | CRC33, Madh, MADH7, MADH8, SMAD family member 7                                                                                                                                                                                                                                                                                                                                                                                                                                                                                                                                                                                                                                                                                                 |
| SMO                            | bnb, CRJS, E130215L21Rik, FZD11, Gx, PHL5, SMOH, Smoothened, smoothened, frizzled class receptor                                                                                                                                                                                                                                                                                                                                                                                                                                                                                                                                                                                                                                                |
| SRC                            | ASV, AW259666, B527, c-SRC, p60-Src, PP60, Pp60/c-Src, pp60c, pp60c-src, Rous sarcoma oncogene, SRC1, SRC proto-oncogene, non-receptor tyrosine kinase, THC6, TVHUSC                                                                                                                                                                                                                                                                                                                                                                                                                                                                                                                                                                            |
| STK36                          | 1700112N14RIK, B930045J24, FU, Fuse, Fused, mKIAA1278, serine/threonine kinase 36, Stk36 (predicted)                                                                                                                                                                                                                                                                                                                                                                                                                                                                                                                                                                                                                                            |
| SUFU                           | b2b273C, JBTS32, PRO1280, Su, SUFUH, SUFU negative regulator of hedgehog signaling, SUFUXL                                                                                                                                                                                                                                                                                                                                                                                                                                                                                                                                                                                                                                                      |
| SYNGAP1                        | Gm1963, MRD5, RASA1, RASA5, Sy, Synaptic Ras-GAP 1, synaptic Ras GTPase activating protein 1 homolog (rat), SYNGAP                                                                                                                                                                                                                                                                                                                                                                                                                                                                                                                                                                                                                              |
| TAB2                           | 1110030N06RIK, A530078N03RIK, CHTD2, LOC101928709, Map3k, MAP3K7IP2, mKIAA0733, RP1 111D63, TGF-beta activated kinase 1 (MAP3K7) binding protein 2, TGF-beta activated kinase 1/MAP3K7 binding protein 2, TGF-β activated kinase 1 (MAP3K7) binding protein 2, TGF-β activated kinase 1/MAP3K7 binding protein 2                                                                                                                                                                                                                                                                                                                                                                                                                                |
| TBID                           | 2700049M22RIK, A1875481, AU022477, BH3 interacting domain death agonist, cBid, FP497                                                                                                                                                                                                                                                                                                                                                                                                                                                                                                                                                                                                                                                            |
| Tgfbeta                        | Tgfb, TGF-beta 1, 2, and 3, TGF β, TGF-β 1, 2, and 3, transforming growth factor-β                                                                                                                                                                                                                                                                                                                                                                                                                                                                                                                                                                                                                                                              |
| Tgfbetarecept                  | TgfbetaR, TGFBR, TGFBR, Tgf β receptor                                                                                                                                                                                                                                                                                                                                                                                                                                                                                                                                                                                                                                                                                                          |
| TGFBFR1                        | AAT5, ACVRLK4, AL, Aik, ALK-5, AU017191, ESK2, ESS1, LDS1, LDS1A, LDS2A, LOC103690035, LOC666236, MSSE, SKR4, Tbet, Tbeta, TbetaR-I, TBR-I, TGFbeta1R1, TGF-beta1 receptor, TGF beta 1 receptor, TGF-beta-r1, TGF beta receptor type I, TGFbetaR1, Tgfb receptor 1, TGFR-1, TGFβ1R1, TGF β 1 receptor, TGFβ R1, Tgf-β R1/R4, Tgf-β receptor1, TGF β receptor type I, TGFβR1, TGF β type 1 receptors, Tgf β type 1 receptors, transforming growth factor beta receptor 1, transforming growth factor beta receptor 1, transforming growth factor, beta receptor I, transforming growth factor-β receptor type 1, T β R1                                                                                                                          |
| TGFBFR2                        | 1110020H15RIK, AAT3, AU042018, DNIIR, FAA3, LDS1B, LDS2, LDS2B, MFS2, RIIC, RIIDN, TAAD2, Tbet, Tbeta, TbetaR-II, TBR, TBR-II, TBRLL, TGFbeta1R2, TGF-beta 2, Tgf beta2 receptor, TGFbeta R2, TGF-beta receptor 2, TGF-beta receptor type 2, TGF beta receptor type II, TGFbetaR-II, TgfbR2T, TGFβ receptor II, TgfbR2, TGFβ R2, TGFβ R2, TGF-β receptor 2, TGF-β receptor type 2, TGF β receptor type II, TGFβRII, Tgf-β type II receptor, transforming growth factor beta receptor 2, transforming growth factor, beta receptor 2, transforming growth factor, beta receptor II, transforming growth factor β receptor 2, transforming growth factor, β receptor 2, transforming growth factor, β receptor II, type 2 TGF-β receptors, T β r2 |
| TP53                           | bbi, BCC7, bly, bhy, BMF55, LFS1, p4, p44, p5, P53, P53 cellular tumour antigen, p53 tumor suppressor, transformation related protein 53, TRP53, tumor protein p53, tumour protein p53                                                                                                                                                                                                                                                                                                                                                                                                                                                                                                                                                          |
| Type I BMP                     | ALK 3,6, ALK 3/6, BMP2 receptor type1, BMP4 receptor type1, Bmpr1, Bmpr                                                                                                                                                                                                                                                                                                                                                                                                                                                                                                                                                                                                                                                                         |
| WNT1                           | BMND16, Int, INT1, O15, sw, swaying, Wg, wingless-type MMTV integration site family, member 1, Wnt-, Wnt family member 1                                                                                                                                                                                                                                                                                                                                                                                                                                                                                                                                                                                                                        |
| WNT5A                          | 8030457G12RIK, hWNT5A, LOC102724616, wingless-type MMTV integration site family, member 5A, Wnt-, Wnt family member 5A                                                                                                                                                                                                                                                                                                                                                                                                                                                                                                                                                                                                                          |
| ZBTB17                         | AA589413, Lp1, Miz, MIZ1, mZ13, pHz-67, Zfp10, Zfp100, Zinc finger and BTB domain containing 17, ZNF151, ZNF60                                                                                                                                                                                                                                                                                                                                                                                                                                                                                                                                                                                                                                  |



## Pathway Analysis Using IPA Software; canonical pathway

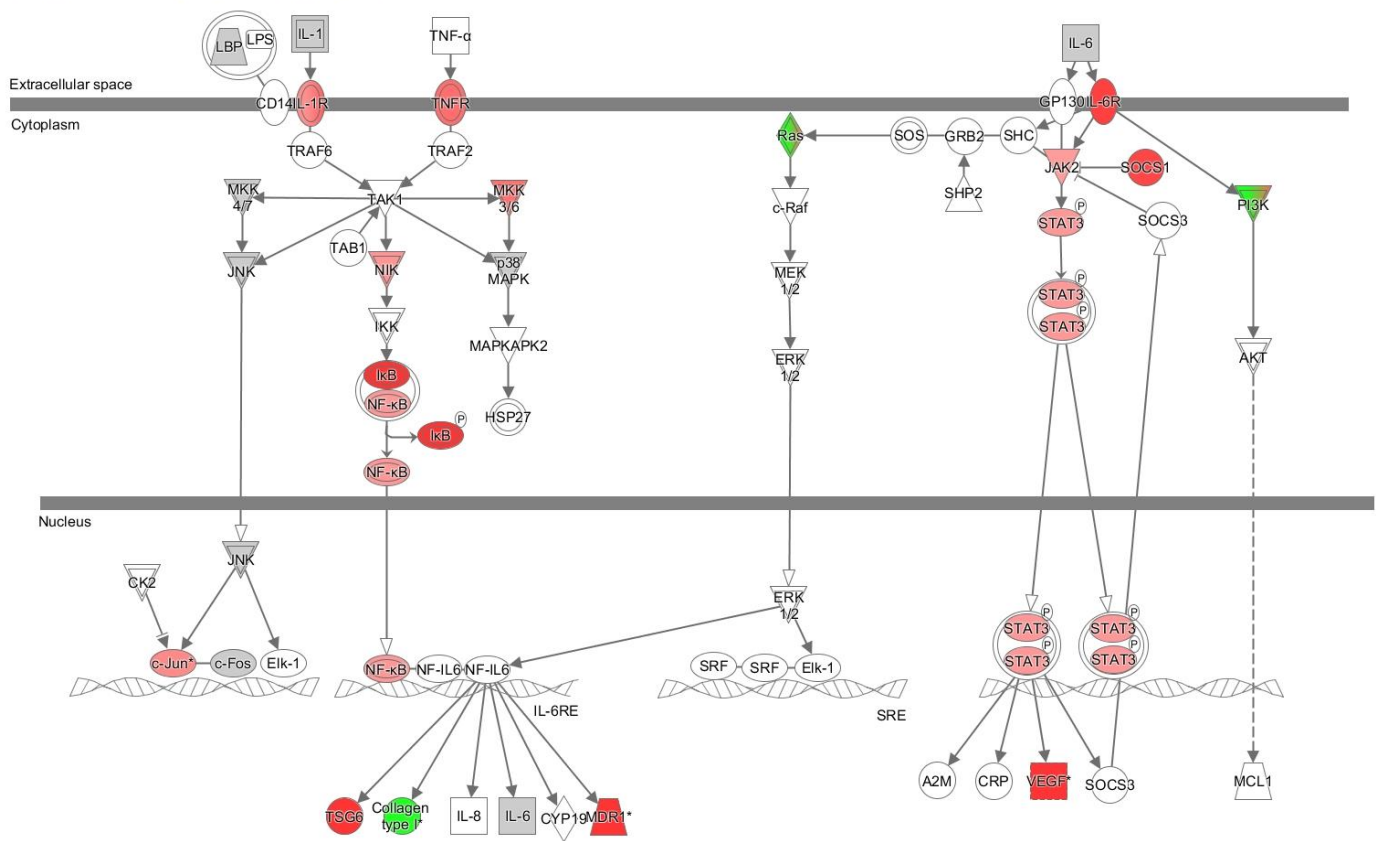

Figure S15. IL-6 Signaling at 6 h

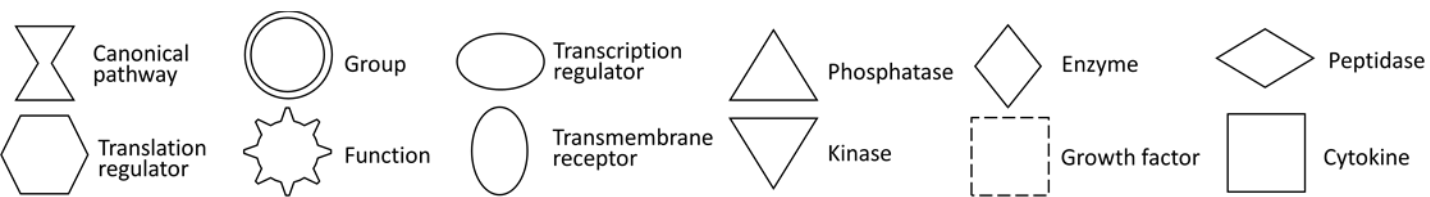

Red: Increased, FDR<0.05 versus solvent control

Green: Decreased, FDR<0.05 versus solvent control

| Symbol                 | Synonym(s)                                                                                                                                                                                                                                                                                                                                                                                                                                                                                                                                                                                                                                                                                                                                                                                                                                                                                                                                                                                                                                                                                                                            |
|------------------------|---------------------------------------------------------------------------------------------------------------------------------------------------------------------------------------------------------------------------------------------------------------------------------------------------------------------------------------------------------------------------------------------------------------------------------------------------------------------------------------------------------------------------------------------------------------------------------------------------------------------------------------------------------------------------------------------------------------------------------------------------------------------------------------------------------------------------------------------------------------------------------------------------------------------------------------------------------------------------------------------------------------------------------------------------------------------------------------------------------------------------------------|
| A2M                    | A2, A2m1, A2maa, A2MAC1, A2mb, A2MD, A2mp, Alpha2 M, Alpha2 macrofetoprotein, alpha2 MACROGLOBIN, Alpha 2 Macroglobulin, alpha-2-macroglobulin-like, Alpha-2-microglobulin, CPAMD5, FWP007, H-2 Class I Histocompatibility Antigen Alpha-Chain, H-2 Class I Histocompatibility Antigen $\alpha$ -Chain, LOC100911545, Mam, S863-7, $\alpha$ 2M, $\alpha$ -2-microglobulin, $\alpha$ -2-macroglobulin, $\alpha$ -2-macroglobulin-like, $\alpha$ -2-microglobulin, $\alpha$ Macroglobulin                                                                                                                                                                                                                                                                                                                                                                                                                                                                                                                                                                                                                                               |
| ABCB1                  | ABC20, Abcb1a, Abcb4, ATP-binding cassette, sub-family B (MDR/TAP), member 1A, ATP binding cassette subfamily B member 1, ATP binding cassette subfamily B member 1A, CD243, CLCS, Ev, Ew32, GP170, Mdr, MDR1, Mdr1a, Mdr3, P-, p-170, P-GLYCOPROTEIN, P-GP, Pgy-, PGY1, Pgy-3                                                                                                                                                                                                                                                                                                                                                                                                                                                                                                                                                                                                                                                                                                                                                                                                                                                        |
| AKT                    | AKT1/2/3, B/Akt, PKB, RAC-PK                                                                                                                                                                                                                                                                                                                                                                                                                                                                                                                                                                                                                                                                                                                                                                                                                                                                                                                                                                                                                                                                                                          |
| CD14                   | CD14 ANTIGEN, CD14 molecule, lipopolysaccharide (LPS) receptor                                                                                                                                                                                                                                                                                                                                                                                                                                                                                                                                                                                                                                                                                                                                                                                                                                                                                                                                                                                                                                                                        |
| CEBPB                  | Agp/eb, ANF-1, ANF-2, CCAAT enhancer binding protein beta, CCAAT/enhancer binding protein beta, CCAAT/enhancer binding protein (C/EBP), beta, CCAAT/enhancer binding protein (C/EBP), $\beta$ , CCAAT enhancer-binding protein $\beta$ , CCAAT/enhancer binding protein $\beta$ , C/EBPbe, C/EBP-beta, C/Ebp Beta-Lip, C/EBP- $\beta$ , CEBP- $\beta$ , C/Ebp $\beta$ -Lip, CR, CRP2, IL-6, IL-6DBP, NF-, NF-IL6, NF-M, TCF5                                                                                                                                                                                                                                                                                                                                                                                                                                                                                                                                                                                                                                                                                                          |
| Ck2                    | Casein Kinase II, CKII                                                                                                                                                                                                                                                                                                                                                                                                                                                                                                                                                                                                                                                                                                                                                                                                                                                                                                                                                                                                                                                                                                                |
| COL1A1                 | Alpha1-1 Collagen, alpha 1(I) COLLAGEN, alpha 1 (I) PROCOLLAGEN, Alpha1 type i collagen, Alpha1 Type I Procollagen, CAFYD, Co, Col, COL1, Col1a, Cola-1, COL I, COLIA1, COLLAGEN 1 alpha1, Collagen alpha1, COLLAGEN alpha1 (I), Collagen alpha 1(I) chain precursor, Collagen I, Collagen i-alpha, COLLAGEN I alpha1, Collagen i- $\alpha$ , Collagen Type1 Alpha1, Collagen type I, COLLAGEN type I alpha 1, collagen, type I, alpha 1, collagen type I alpha 1 chain, Collagen type I pro $\alpha$ 1, COLLAGEN type I $\alpha$ 1, collagen, type I, $\alpha$ 1, collagen type I $\alpha$ 1 chain, Collagen $\alpha$ 1(I), Collagen $\alpha$ 1(I) chain precursor, EDSARTH1, EDSC, Mov-, Mov-13, OI1, OI2, OI3, OI4, PREPRO COLLAGEN alpha1(I), PROCOLLAGEN 1alpha1, PROCOLLAGEN 1(I), Procollagen alpha1 (1), PROCOLLAGEN alpha1(I), Procollagen alpha1 type I, PROCOLLAGEN-ALPHA1, Procollagen type 1, Procollagen $\alpha$ 1(i), type1 alpha 1 COLLAGEN, type1 alpha1 PROCOLLAGEN, type1 $\alpha$ 1 COLLAGEN, Type I (alpha 1) procollagen, Type I ( $\alpha$ 1) procollagen, $\alpha$ 1(i) COLLAGEN, $\alpha$ 1 (I) PROCOLLAGEN |
| CRP                    | Aa1249, Ab1-341, Ab2-196, Ac1-114, Ac1262, Ac2-069, A1255847, Ba2-693, C REACTIVE, C-reactive protein, C-reactive protein, pentraxin-related, PTX1                                                                                                                                                                                                                                                                                                                                                                                                                                                                                                                                                                                                                                                                                                                                                                                                                                                                                                                                                                                    |
| CXCL8                  | C-X-C motif chemokine ligand 8, GCP-1, hnlL-8, IL8, LECT, LUCT, LYNAP, MDNCF, MONAP, Monocyte-derived neutrophil chemotactic factor, NAF, NAP-1, SCYB8                                                                                                                                                                                                                                                                                                                                                                                                                                                                                                                                                                                                                                                                                                                                                                                                                                                                                                                                                                                |
| CYP19A1                | A, Ar, ArKO, ARO, ARO1, Aromatase, CPV1, CYAR, Cyp1, CYP19, Cyp19a, CYP19P1, CYPXIX, cytochrome P450 family 19 subfamily A member 1, cytochrome P450, family 19, subfamily a, polypeptide 1, In, Int, Int-5, LOC100359906, p450, P-450AROM, p450 aromatase                                                                                                                                                                                                                                                                                                                                                                                                                                                                                                                                                                                                                                                                                                                                                                                                                                                                            |
| ELK1                   | ELK, ELK1, member of ETS oncogene family, ETS transcription factor ELK1, p62TCF, RGD-2549, TCF/ELK                                                                                                                                                                                                                                                                                                                                                                                                                                                                                                                                                                                                                                                                                                                                                                                                                                                                                                                                                                                                                                    |
| ERK1/2                 | MAPK p44/42, MAPK p44/p42, p42/44 mapk, P42/p44 erk, P42/p44 mapk, p42/p44 MAP KINASE                                                                                                                                                                                                                                                                                                                                                                                                                                                                                                                                                                                                                                                                                                                                                                                                                                                                                                                                                                                                                                                 |
| FOS                    | AP-1, c-f, C-FOS, D12Rfj, D12Rf1, FBj osteosarcoma oncogene, Fos proto-oncogene, AP-1 transcription factor subunit, p55                                                                                                                                                                                                                                                                                                                                                                                                                                                                                                                                                                                                                                                                                                                                                                                                                                                                                                                                                                                                               |
| GRB2                   | AA408164, ASH, Ash-psi, EGFRBP-GRB2, GRAB2, GRBS, growth factor receptor bound protein 2, MST084, MSTP084, NCKAP2                                                                                                                                                                                                                                                                                                                                                                                                                                                                                                                                                                                                                                                                                                                                                                                                                                                                                                                                                                                                                     |
| Hsp27                  | Heat Shock Protein 27                                                                                                                                                                                                                                                                                                                                                                                                                                                                                                                                                                                                                                                                                                                                                                                                                                                                                                                                                                                                                                                                                                                 |
| Ikb                    | I KAPPA B, Ikbeta, Ikb, Ik-B                                                                                                                                                                                                                                                                                                                                                                                                                                                                                                                                                                                                                                                                                                                                                                                                                                                                                                                                                                                                                                                                                                          |
| IkB-Nfkb               | IkappaB-NFkappaB, IkB-Nfkb, NFkB-IkB                                                                                                                                                                                                                                                                                                                                                                                                                                                                                                                                                                                                                                                                                                                                                                                                                                                                                                                                                                                                                                                                                                  |
| IKK                    | I Kappa B Kinase, IKKALPHABETA, IKK Complex, I $\kappa$ B Kinase                                                                                                                                                                                                                                                                                                                                                                                                                                                                                                                                                                                                                                                                                                                                                                                                                                                                                                                                                                                                                                                                      |
| IL1                    | Interleukin-1                                                                                                                                                                                                                                                                                                                                                                                                                                                                                                                                                                                                                                                                                                                                                                                                                                                                                                                                                                                                                                                                                                                         |
| IL1 receptor           | IL1 receptor, Interleukin-1 Receptor                                                                                                                                                                                                                                                                                                                                                                                                                                                                                                                                                                                                                                                                                                                                                                                                                                                                                                                                                                                                                                                                                                  |
| IL6                    | BSF-2, CDF, FDGI, HGF, HSF, IFN beta 2A, IFN $\beta$ 2A, IFN-beta-2, IFN- $\beta$ -2, IFNB2, Il, IL6g, interleukin-6                                                                                                                                                                                                                                                                                                                                                                                                                                                                                                                                                                                                                                                                                                                                                                                                                                                                                                                                                                                                                  |
| IL6R                   | CD126, Gp80, HIES5, I, IL, IL-1Ra, IL6Q, IL6QTL, IL-6R-1, IL-6RA, IL-6R-alpha, Il6 receptor, IL6RQ, IL-6R- $\alpha$ , interleukin 6 receptor, interleukin 6 receptor, alpha, INTERLEUKIN-6 receptors, interleukin 6 receptor, $\alpha$ , Interleukin 6 receptor $\alpha$ chain                                                                                                                                                                                                                                                                                                                                                                                                                                                                                                                                                                                                                                                                                                                                                                                                                                                        |
| IL6ST                  | 5133400A03Rik, AA389424, Ac1055, BB405851, CD130, CDW130, D13Ertdd699, D13Ertdd699e, Glycoprotein 130, gp13, GP130, HIES4, IL-27R-beta, IL-27R- $\beta$ , IL-6RB, Il6 transd, interleukin 6 cytokine family signal transducer, Interleukin-6 receptor $\beta$ chain, interleukin 6 signal transducer, Interleukin 6 signal transduction molecule                                                                                                                                                                                                                                                                                                                                                                                                                                                                                                                                                                                                                                                                                                                                                                                      |
| JAK2                   | A1504024, C81284, Fd17, Janus kinase 2, JTK10                                                                                                                                                                                                                                                                                                                                                                                                                                                                                                                                                                                                                                                                                                                                                                                                                                                                                                                                                                                                                                                                                         |
| Jnk                    | JNK 54/46, Jnk p56, JNK/SAPK, JUN KINASE, p40, p47, Sapk/Jnk                                                                                                                                                                                                                                                                                                                                                                                                                                                                                                                                                                                                                                                                                                                                                                                                                                                                                                                                                                                                                                                                          |
| JUN                    | Activator protein 1, AP-1, API-1, c-ju, cJUN, Junc, jun proto-oncogene, Jun proto-oncogene, AP-1 transcription factor subunit, LOC100288387, LOC100291417, LOC100293034, p39, v-Jun, V-jun Avian Sarcoma Virus 17 Oncogene Homolog, V-jun Sarcoma Virus 17 Oncogene Homolog                                                                                                                                                                                                                                                                                                                                                                                                                                                                                                                                                                                                                                                                                                                                                                                                                                                           |
| LBP                    | Bpif, BP1FD2, Lipopolysaccharide binding, lipopolysaccharide binding protein, Ly88                                                                                                                                                                                                                                                                                                                                                                                                                                                                                                                                                                                                                                                                                                                                                                                                                                                                                                                                                                                                                                                    |
| Lbp-lipopolysaccharide |                                                                                                                                                                                                                                                                                                                                                                                                                                                                                                                                                                                                                                                                                                                                                                                                                                                                                                                                                                                                                                                                                                                                       |
| LPS                    | C211H376N8O126P6, endotoxin, endotoxin protein, lipopolysaccharides, LPS, TLR4 agonist LPS                                                                                                                                                                                                                                                                                                                                                                                                                                                                                                                                                                                                                                                                                                                                                                                                                                                                                                                                                                                                                                            |
| MAP2K1/2               | MEK1/2, MKK1/2                                                                                                                                                                                                                                                                                                                                                                                                                                                                                                                                                                                                                                                                                                                                                                                                                                                                                                                                                                                                                                                                                                                        |
| MAP2K4/7               | Jnkk, MEK 4/7, MKK 4/7                                                                                                                                                                                                                                                                                                                                                                                                                                                                                                                                                                                                                                                                                                                                                                                                                                                                                                                                                                                                                                                                                                                |
| MAP3K7                 | CSCF, FMD2, Map3k7 predicted, MEKK7, mitogen-activated protein kinase kinase kinase 7, TAK1, TGF1a, tgf $\beta$ activated kinase 1                                                                                                                                                                                                                                                                                                                                                                                                                                                                                                                                                                                                                                                                                                                                                                                                                                                                                                                                                                                                    |
| MAPKAPK2               | AA960234, MAPK activated protein kinase 2, Mapkap2, MAPKAP Kinase 2, MAP kinase-activated protein kinase 2, MK-2, Rps6, Rps6kc1                                                                                                                                                                                                                                                                                                                                                                                                                                                                                                                                                                                                                                                                                                                                                                                                                                                                                                                                                                                                       |
| MCL1                   | AW556805, BCL2L3, EAT, Mcl-, MCL1 apoptosis regulator, BCL2 family member, mcl1/EAT, myeloid cell leukaemia sequence 1, myeloid cell leukemia sequence 1, TM                                                                                                                                                                                                                                                                                                                                                                                                                                                                                                                                                                                                                                                                                                                                                                                                                                                                                                                                                                          |
| Mkk3/6                 | MEK3/6, Mkk3/6 (mitogen activated protein kinase kinase 3/6), MKK3/MKK6                                                                                                                                                                                                                                                                                                                                                                                                                                                                                                                                                                                                                                                                                                                                                                                                                                                                                                                                                                                                                                                               |
| NFkB                   | NF-KAPPA B, NF- $\kappa$ B, nuclear factor- $\kappa$ b, transcription factor nuclear factor $\kappa$ b                                                                                                                                                                                                                                                                                                                                                                                                                                                                                                                                                                                                                                                                                                                                                                                                                                                                                                                                                                                                                                |
| NIK                    |                                                                                                                                                                                                                                                                                                                                                                                                                                                                                                                                                                                                                                                                                                                                                                                                                                                                                                                                                                                                                                                                                                                                       |
| p38 MAPK               | P38, p38 MAP KINASE, P38 MITOGEN-ACTIVATED protein KINASE                                                                                                                                                                                                                                                                                                                                                                                                                                                                                                                                                                                                                                                                                                                                                                                                                                                                                                                                                                                                                                                                             |
| PI3K                   | 1-phosphatidylinositol 3-kinase, 2.7.1.137, ATP:1-phosphatidyl-1D-myo-inositol 3-phosphotransferase, Phosphatidylinositol 3 kinase, phosphatidylinositol 3'-kinase, PI3-kinase, PtdIns 3 Kinase, type III phosphoinositide 3-kinase, type I phosphatidylinositol kinase, Vps34p                                                                                                                                                                                                                                                                                                                                                                                                                                                                                                                                                                                                                                                                                                                                                                                                                                                       |
| PTPN11                 | 2700084A17Rik, AW536184, BPTP3, CFC, JMML, METCDS, MGC14433, Noonan syndrome 1, NS1, protein tyrosine phosphatase non-receptor type 11, protein tyrosine phosphatase, non-receptor type 11, PTP, PTP-1D, PTPC2, S, SAP-2, Sh, SH-P, SHP-2, SH-PTP2, SH-PTP3, Src homology protein 2, SYP                                                                                                                                                                                                                                                                                                                                                                                                                                                                                                                                                                                                                                                                                                                                                                                                                                              |
| RAF1                   | 6430402F14Rik, AA990557, BB129353, CMD1NN, c-R, Cra, CRAF, Craf1, D830050J10Rik, leukaemia ONCOGENE HOMOLOG1, LEUKEMIA ONCOGENE HOMOLOG1, NS5, Raf-1 proto-oncogene, serine/threonine kinase, v-, v-Raf, v-raf-Leukaemia viral oncogene 1, v-raf-Leukemia viral oncogene 1                                                                                                                                                                                                                                                                                                                                                                                                                                                                                                                                                                                                                                                                                                                                                                                                                                                            |
| Ras                    |                                                                                                                                                                                                                                                                                                                                                                                                                                                                                                                                                                                                                                                                                                                                                                                                                                                                                                                                                                                                                                                                                                                                       |
| SHC1                   | p52SHC, p6, p66, p66s, P66shc, Sh, SHC, Shc (46 kDa isoform), SHCA, SHC adaptor protein 1, Shc p66 isoform, src homology 2 domain-containing transforming protein C1                                                                                                                                                                                                                                                                                                                                                                                                                                                                                                                                                                                                                                                                                                                                                                                                                                                                                                                                                                  |
| SOCs1                  | Cis, CIS1, CISH1, Cish7, JA, JAB, JBP, SOC, Sosc1, SS, SSI-1, STAT INDUCED STAT INHIBITOR-1, suppressor of cytokine signaling 1, TIP-3                                                                                                                                                                                                                                                                                                                                                                                                                                                                                                                                                                                                                                                                                                                                                                                                                                                                                                                                                                                                |
| SOCs3                  | ATOD4, Ci, Cis, CIS3, CISH3, EF-10, SOC, Soc3, Sosc3, SS, SSI-3, Suppressor of cytokine signaling 3                                                                                                                                                                                                                                                                                                                                                                                                                                                                                                                                                                                                                                                                                                                                                                                                                                                                                                                                                                                                                                   |
| Sos                    |                                                                                                                                                                                                                                                                                                                                                                                                                                                                                                                                                                                                                                                                                                                                                                                                                                                                                                                                                                                                                                                                                                                                       |
| SRF                    | AW049942, AW240594, MCM1, PRTF, RGD1559787, serum response factor, Sfr                                                                                                                                                                                                                                                                                                                                                                                                                                                                                                                                                                                                                                                                                                                                                                                                                                                                                                                                                                                                                                                                |
| STAT3                  | 1110034C02Rik, A, acute-phase response factor, ADMIO, ADMIO1, APRF, AW109958, HIES, MGC16063, signal transducer and activator of transcription 3, Stat3 alpha isoform, Stat3 beta isoform, Stat3 delta, Stat3 $\alpha$ isoform, Stat3 $\beta$ isoform, Stat3 $\delta$                                                                                                                                                                                                                                                                                                                                                                                                                                                                                                                                                                                                                                                                                                                                                                                                                                                                 |
| Stat3-Stat3            | STAT3 dimer                                                                                                                                                                                                                                                                                                                                                                                                                                                                                                                                                                                                                                                                                                                                                                                                                                                                                                                                                                                                                                                                                                                           |
| TAB1                   | 2310012M03Rik, 3'-Tab1, b2b449C, b2b449Clo, Map3k, MAP3K7IP1, TGF-beta activated kinase 1 (MAP3K7) binding protein 1, TGF-beta activated kinase 1/MAP3K7 binding protein 1, TGF $\beta$ -Activated Kinase-Binding Protein 1                                                                                                                                                                                                                                                                                                                                                                                                                                                                                                                                                                                                                                                                                                                                                                                                                                                                                                           |
| TNF                    | AT-TNF, Di, DIF, RATTNF, TMTNF, Tn, TNF-a, TNF-alpha, Tnfs, Tnfsf1a, TNFSF2, TNF- $\alpha$ , TNLG1F, tumor necrosis factor, Tumor Necrosis Factor $\alpha$ , tumor necrosis factor, $\alpha$ , tumour necrosis factor, tumour Necrosis Factor Alpha, tumour necrosis factor, alpha, tumour Necrosis Factor $\alpha$ , tumour necrosis factor, $\alpha$                                                                                                                                                                                                                                                                                                                                                                                                                                                                                                                                                                                                                                                                                                                                                                                |
| Tnf receptor           | member of the tumour necrosis factor receptor family, TNFR, TNF R1, Tnf receptor superfamily, tumour necrosis factor receptor                                                                                                                                                                                                                                                                                                                                                                                                                                                                                                                                                                                                                                                                                                                                                                                                                                                                                                                                                                                                         |
| TNFAIP6                | Tnf, TNF alpha induced protein 6, TNFIP6, TNF $\alpha$ induced protein 6, TSG-, TSG-6, tumor necrosis factor alpha induced protein 6, tumor necrosis factor $\alpha$ induced protein 6, tumour necrosis factor alpha induced protein 6, tumour necrosis factor $\alpha$ induced protein 6                                                                                                                                                                                                                                                                                                                                                                                                                                                                                                                                                                                                                                                                                                                                                                                                                                             |
| TRAF2                  | A1325259, MGC:45012, RNF117, TNF receptor-associated factor 2, TRAP, TRAP3                                                                                                                                                                                                                                                                                                                                                                                                                                                                                                                                                                                                                                                                                                                                                                                                                                                                                                                                                                                                                                                            |
| TRAF6                  | 2310003F17Rik, A1851288, C630032O20Rik, LOC100042930, LOC100048242, MGC:3310, RNF85, TNF receptor-associated factor 6                                                                                                                                                                                                                                                                                                                                                                                                                                                                                                                                                                                                                                                                                                                                                                                                                                                                                                                                                                                                                 |
| VEGFA                  | Gd-vegf, MVCD1, V, vascular endothelial growth factor A, Veg, VEGF, VEGF111, VEGF12, VEGF16, VEGF18, Vegf-3, VPF                                                                                                                                                                                                                                                                                                                                                                                                                                                                                                                                                                                                                                                                                                                                                                                                                                                                                                                                                                                                                      |



# Pathway Analysis Using IPA Software; canonical pathway

Nucleus

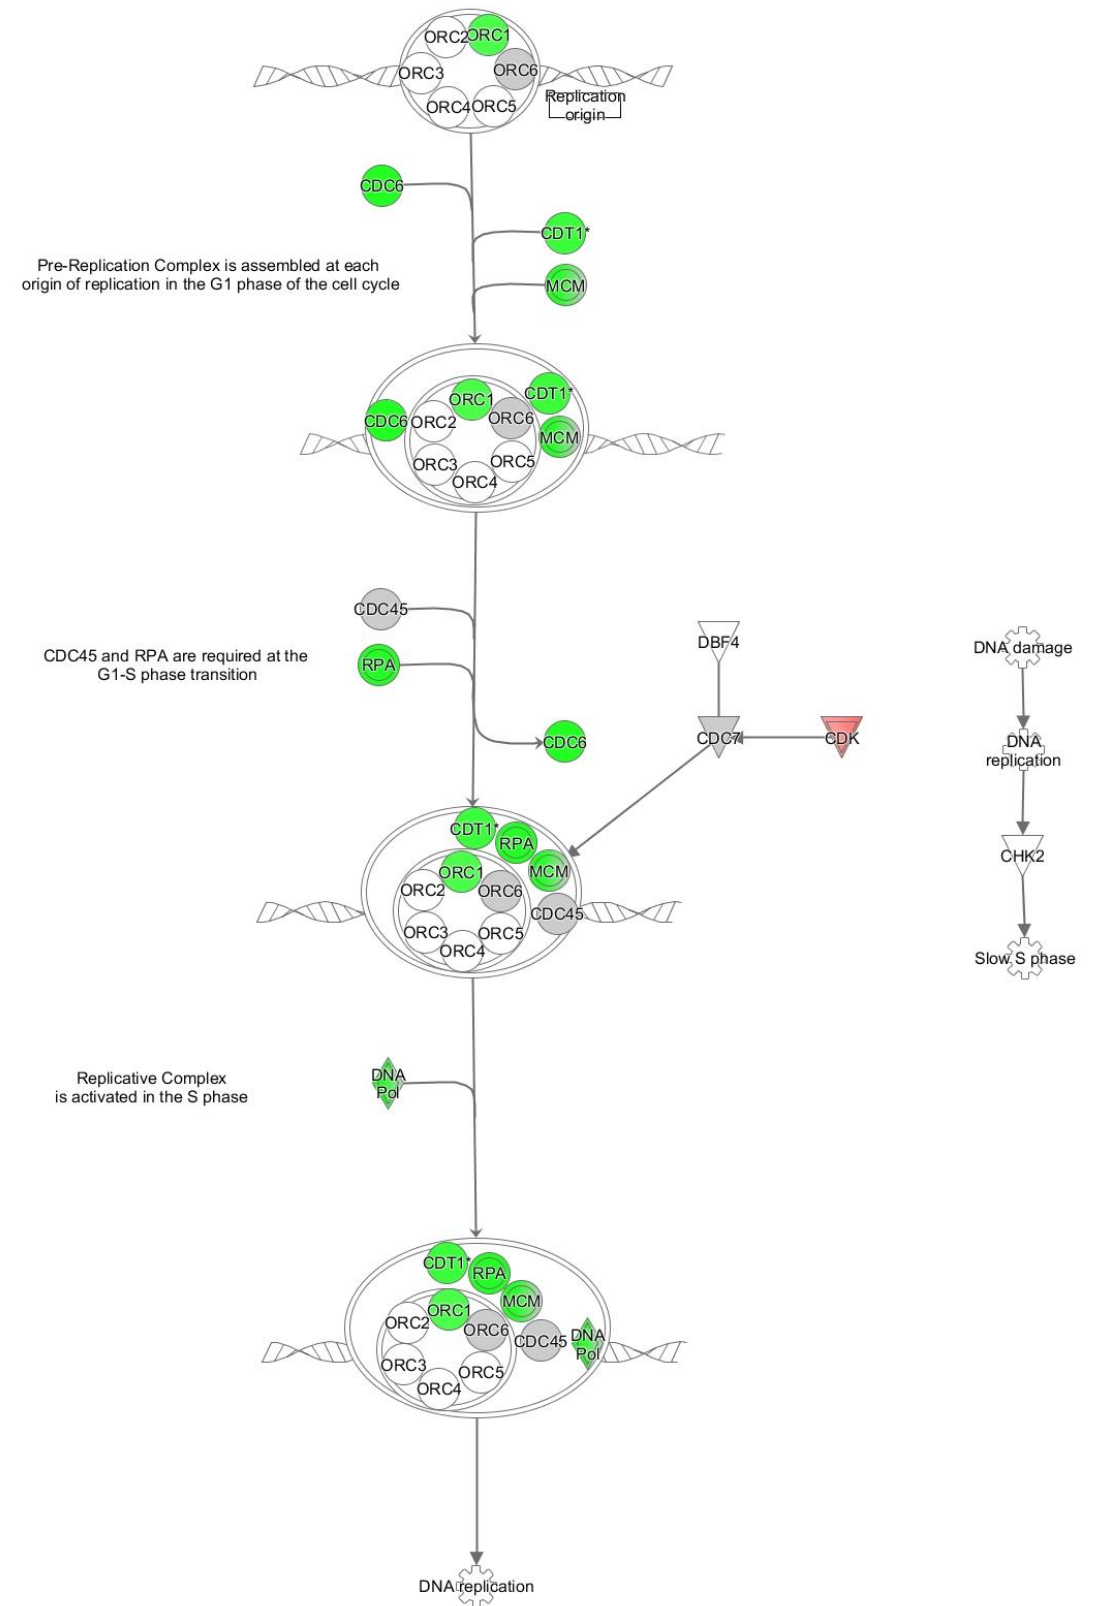

Figure S16. Cell Cycle Control of Chromosomal Replication at 6 h

| Symbol                 | Synonym(s)                                                                                                                                        |
|------------------------|---------------------------------------------------------------------------------------------------------------------------------------------------|
| CDC45                  | Cdc45i, CDC45L, CDC45L2, cell division cycle 45, LOC287961, MGORS7, PORC-PI-1                                                                     |
| CDC6                   | CDC18, CDC18L, Cdc6-related, cell division cycle 6, HsCDC18, HsCDC6, MGORS5, p62(cdc6)                                                            |
| CDC7                   | AI597260, Cdc7l, CDC7L1, CDC7-RELATED KINASE, cell division cycle 7, cell division cycle 7 (S. cerevisiae), HsCDC7, Hsk1, huCDC7, muCdc7          |
| CDK                    | Cdks, cyclin-dependent kinase, Cyclin-Dependent Kinases, G1 CDK                                                                                   |
| CDT1                   | 2610318F11Rik, AW545653, C76791, chromatin licensing and DNA replication factor 1, DUP, R, RIS2                                                   |
| CHEK2                  | CDS1, Check2, checkpoint kinase 2, CHK2, hCds1, HUCDS1, LFS2, PP1425, Rad, RAD53                                                                  |
| DBF4                   | A, AA545217, ASK, CHIF, DBF4A, DBF4 zinc finger, LOC100912278, RGD1305854, ZDBF1                                                                  |
| DNAPolymerase          | DNA Pol                                                                                                                                           |
| ORC1                   | AA545195, HSORC1, MmOR, MmORC1, Or, ORC1L, Origin recognition, origin recognition complex subunit 1, origin recognition complex, subunit 1, PARC1 |
| ORC2                   | AU041563, Or, ORC2L, origin recognition complex subunit 2, origin recognition complex, subunit 2                                                  |
| ORC3                   | LAT, LATHEO, Or, ORC3L, origin recognition complex subunit 3, origin recognition complex, subunit 3                                               |
| ORC4                   | mMmOR, mMmORC4, Or, ORC4L, Orc4l2, ORC4P, origin recognition complex subunit 4, origin recognition complex, subunit 4                             |
| ORC5                   | AL033327, MmOR, MmORC5, Or, ORC5L, ORC5P, origin recognition complex subunit 5, origin recognition complex, subunit 5, PPP1R117                   |
| ORC6                   | 6720420I10Rik, Or, ORC6L, origin recognition complex subunit 6, origin recognition complex, subunit 6                                             |
| Prereplicative Complex | pre-RC                                                                                                                                            |

# Pathway Analysis Using IPA Software; canonical pathway

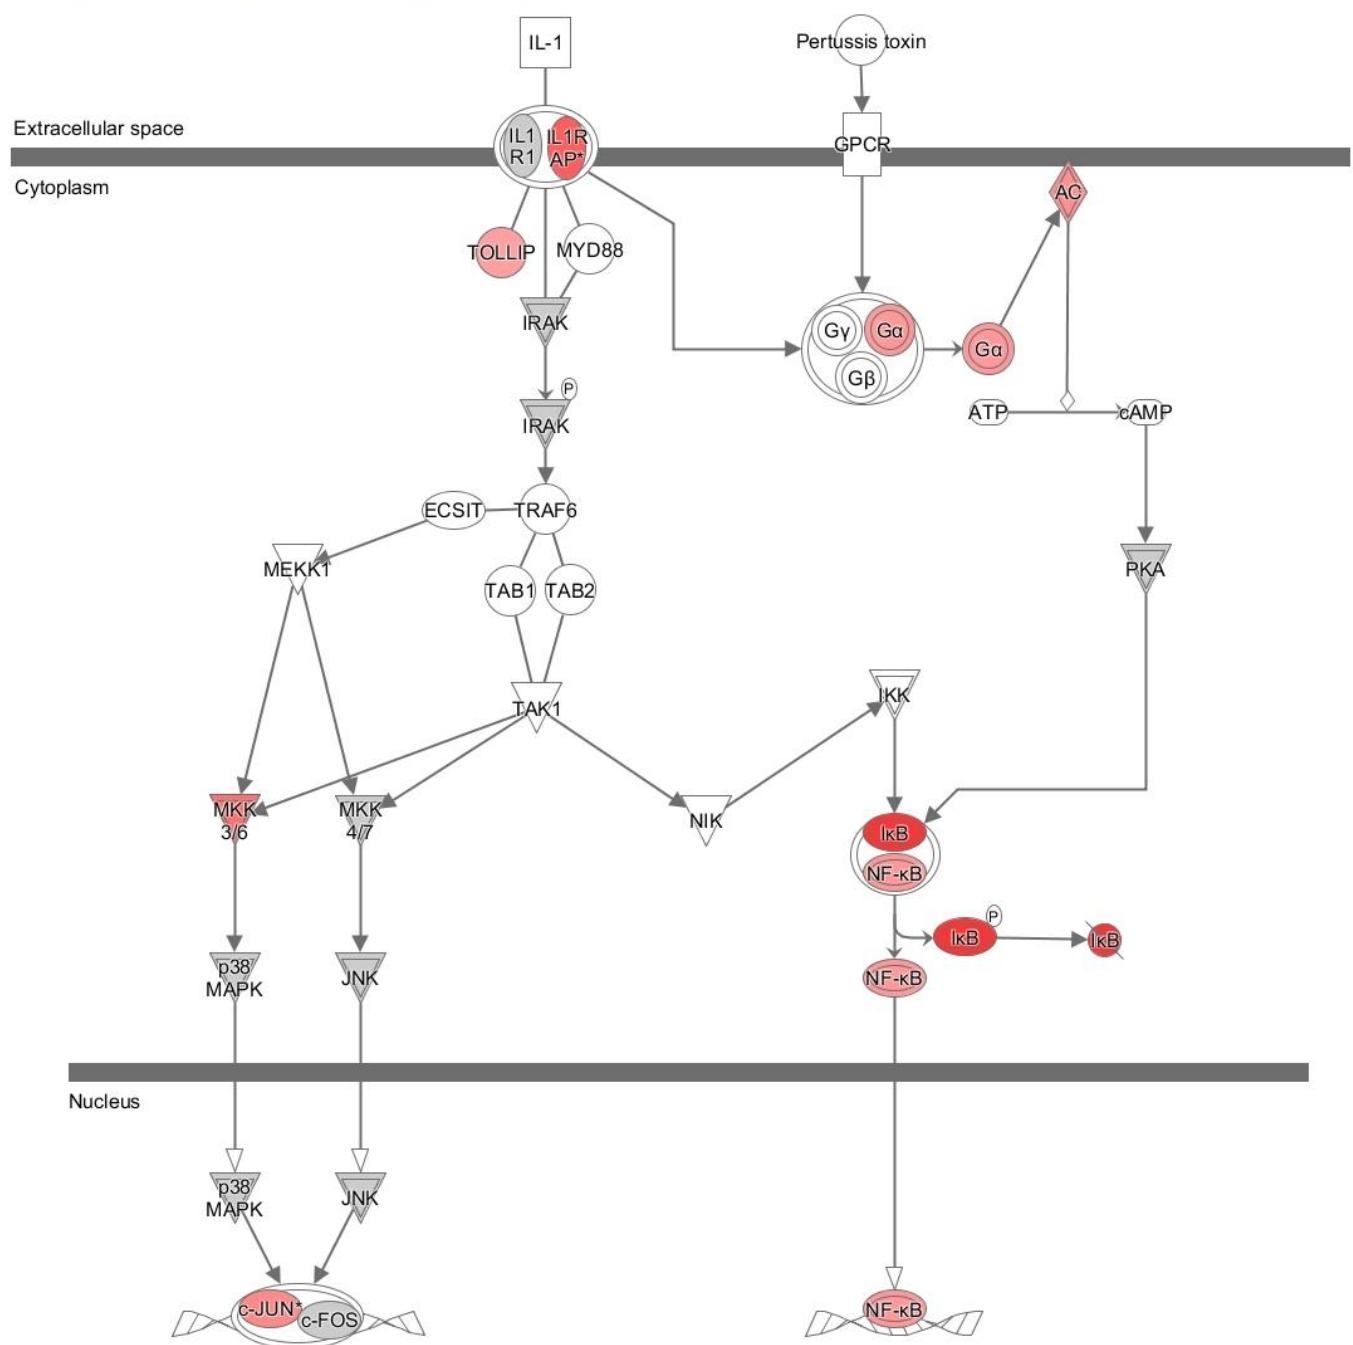

Figure S17. IL-1 Signaling at 6 h

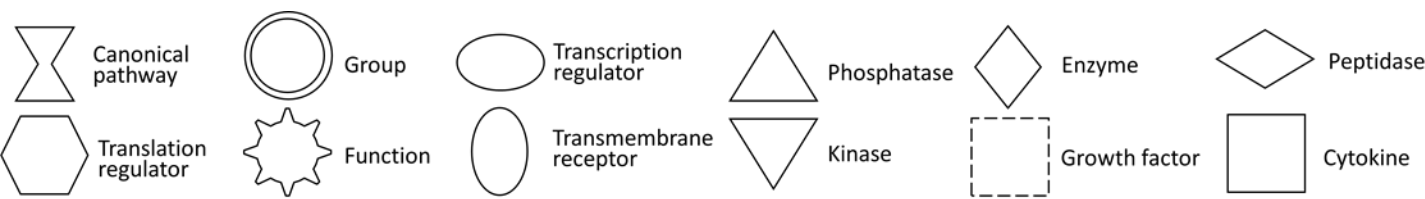

Red: Increased, FDR<0.05 versus solvent control

Green: Decreased, FDR<0.05 versus solvent control

| Symbol         | Synonym(s)                                                                                                                                                                                                                                                                                                                                                                                                                                                                                                                                                                                                                                                                                                                    |
|----------------|-------------------------------------------------------------------------------------------------------------------------------------------------------------------------------------------------------------------------------------------------------------------------------------------------------------------------------------------------------------------------------------------------------------------------------------------------------------------------------------------------------------------------------------------------------------------------------------------------------------------------------------------------------------------------------------------------------------------------------|
| ADCY           | 3',5'-cyclic AMP synthetase, 4.6.1.1, AC, Adenyl Cyclase, Adenylate Cyclase, Adenylyl cyclase, ATP diphosphate-lyase (cyclizing), mAC, sAC                                                                                                                                                                                                                                                                                                                                                                                                                                                                                                                                                                                    |
| Ap1            | activator protein-1, c-Jun                                                                                                                                                                                                                                                                                                                                                                                                                                                                                                                                                                                                                                                                                                    |
| ATP            | [[[(2R,3S,4R,5R)-5-(6-aminopurin-9-yl)-3,4-dihydroxyoxolan-2-yl]methoxy-hydroxyphosphoryl] phosphono hydrogen phosphate, 56-65-5, 9-beta-D-arabinofuranosyladenine 5'-triphosphate, 9-beta-D-arabinofuranosyladenine 5'-triphosphate, adenosine 5'-(tetrahydrogen triphosphate), adenosine 5'-triphosphate, ATP, ATP4-, C10H16N5O13P3                                                                                                                                                                                                                                                                                                                                                                                         |
| cAMP           | 11002-78-1, 33116-15-3, 3',5'-cyclic AMP, 3',5'-monophosphate, adenosine cyclic, 37839-81-9, (4aR,6R,7R,7aS)-6-(6-aminopurin-9-yl)-2-hydroxy-2-oxo-4a,6,7,7a-tetrahydro-4H-furo[3,2-d][1,3,2]dioxaphosphinin-7-ol, 54532-48-8, 55576-98-2, 60-92-4, 66067-13-8, 68407-13-6, adenosine 3',5'-phosphate, adenosine, cyclic 3',5'-(hydrogen phosphate), adenosine cyclic 3,5 monophosphate, adenosine cyclic 3',5'-monophosphate, adenosine cyclic monophosphate, C10H12N5O6P, cAMP, cyclic-3',5'-monophosphate, adenosine, cyclic adenosine monophosphate, cyclic adenylic acid, cyclic AMP, disodium salt, cyclic AMP, monoammonium salt, cyclic AMP, monopotassium salt, cyclic AMP, monosodium salt, cyclic AMP, sodium salt |
| ECSIT          | ECSIT signaling integrator, ECSIT signalling integrator, Sit, SITPEC                                                                                                                                                                                                                                                                                                                                                                                                                                                                                                                                                                                                                                                          |
| FOS            | AP-1, c-f, C-FOS, D12Rfj, D12Rf1, FBJ osteosarcoma oncogene, Fos proto-oncogene, AP-1 transcription factor subunit, p55                                                                                                                                                                                                                                                                                                                                                                                                                                                                                                                                                                                                       |
| G protein      | Galphabetagamma, Galpha-Gbeta-Ggamma, Galphai-Gbeta-Ggamma, Galphaq-Gbeta-Ggamma, Gpro, G protein alpha beta gamma, G protein alpha-G protein beta-GDP-G protein gamma, G protein alpha-G protein beta-G protein gamma, G-protein complex, G protein alpha-G protein beta-GDP-G protein gamma, G protein alpha-G protein beta-G protein gamma, G-protein alpha-beta-gamma, Guanine nucleotide binding protein, Ga-Gβ-Gγ, Gai-Gβ-Gγ, Gaq-Gβ-Gγ, Gαβγ                                                                                                                                                                                                                                                                           |
| G proteinalpha | Galpha, G-Protein Alpha Subunit, G protein alpha, G-Protein alpha Subunit, Ga                                                                                                                                                                                                                                                                                                                                                                                                                                                                                                                                                                                                                                                 |
| G proteinbeta  | Gbeta, G-protein beta, Gβ                                                                                                                                                                                                                                                                                                                                                                                                                                                                                                                                                                                                                                                                                                     |
| G proteingamma | Ggamma, G protein gamma SUBUNITS, G-protein gamma, G protein gamma SUBUNITS, Gγ                                                                                                                                                                                                                                                                                                                                                                                                                                                                                                                                                                                                                                               |
| Ikb            | I KAPPA B, Ikbeta, Iκβ, Iκ-B                                                                                                                                                                                                                                                                                                                                                                                                                                                                                                                                                                                                                                                                                                  |
| IκB-NfκB       | IκappaB-NFκappaB, IκB-NFκB, NFκB-IκB                                                                                                                                                                                                                                                                                                                                                                                                                                                                                                                                                                                                                                                                                          |
| IKK            | I Kappa B Kinase, IKKALPHABETA, IKK Complex, I κ B Kinase                                                                                                                                                                                                                                                                                                                                                                                                                                                                                                                                                                                                                                                                     |
| IL1A           | IL1, IL, IL-1 alpha, IL-1F1, IL1-ALPHA, interleukin 1 alpha, interleukin-1 alpha, Interleukin-A                                                                                                                                                                                                                                                                                                                                                                                                                                                                                                                                                                                                                               |
| IL1R1          | CD121, CD121A, CD121b, D2S1473, I, IL-, II1, IL1bRa, IL1R, IL-1RA, IL-1R-alpha, IL-1RI, IL-1R-alpha, IL-1R, INTERLEUKIN 1 beta receptor, interleukin 1 receptor type 1, interleukin 1 receptor, type I, INTERLEUKIN 1 beta receptor, P80                                                                                                                                                                                                                                                                                                                                                                                                                                                                                      |
| IL1RAP         | 6430709H04RIK, A1255955, AV239853, C3orf13, IL-, IL1R3, IL-1RACp, Il1racpb, Il-1 receptor accessory, ILRAP, interleukin 1 receptor accessory protein                                                                                                                                                                                                                                                                                                                                                                                                                                                                                                                                                                          |
| JNK            | JNK 54/46, Jnk p56, JNK/SAPK, JUN KINASE, p40, p47, Sapk/Jnk                                                                                                                                                                                                                                                                                                                                                                                                                                                                                                                                                                                                                                                                  |
| JUN            | Activator protein 1, AP-1, API-1, c-ju, cJUN, Junc, jun proto-oncogene, Jun proto-oncogene, AP-1 transcription factor subunit, LOC100288387, LOC100291417, LOC100293034, p39, v-Jun, V-jun Avian Sarcoma Virus 17 Oncogene Homolog, V-jun Sarcoma Virus 17 Oncogene Homolog                                                                                                                                                                                                                                                                                                                                                                                                                                                   |
| MAP2K4/7       | Jnk, MEK 4/7, MKK 4/7                                                                                                                                                                                                                                                                                                                                                                                                                                                                                                                                                                                                                                                                                                         |
| MAP3K1         | LOC100912399, MAPK, MAPKKK1, MEKK, MEKK 1, MEK KINASE, MEK KINASE 1, mitogen-activated protein kinase kinase kinase 1, mitogen-activated protein kinase kinase kinase 1-like, Raf, SRXY6                                                                                                                                                                                                                                                                                                                                                                                                                                                                                                                                      |
| MAP3K14        | aly, FTDCR1B, HS, HSNIK, mitogen-activated protein kinase kinase kinase 14, N, NFκB INDUCING KINASE, nf κ b inducing kinase, NIK                                                                                                                                                                                                                                                                                                                                                                                                                                                                                                                                                                                              |
| MAP3K7         | CSCF, FMD2, Map3k7 predicted, MEKK7, mitogen-activated protein kinase kinase kinase 7, TAK1, TGF1a, tgf beta activated kinase 1                                                                                                                                                                                                                                                                                                                                                                                                                                                                                                                                                                                               |
| Mkk3/6         | MEK3/6, Mkk3/6 (mitogen activated protein kinase kinase 3/6), MKK3/MKK6                                                                                                                                                                                                                                                                                                                                                                                                                                                                                                                                                                                                                                                       |
| MYD88          | IMD68, MYD88D, MYD88 innate immune signal transduction adaptor, MYD88, innate immune signal transduction adaptor, myeloid differentiation primary response gene 88                                                                                                                                                                                                                                                                                                                                                                                                                                                                                                                                                            |
| NFκB           | NF-KAPPA B, NF-κ B, nuclear factor-κ b, transcription factor nuclear factor κ b                                                                                                                                                                                                                                                                                                                                                                                                                                                                                                                                                                                                                                               |
| p38MAPK        | P38, p38 MAP KINASE, P38 MITOGEN-ACTIVATED protein KINASE                                                                                                                                                                                                                                                                                                                                                                                                                                                                                                                                                                                                                                                                     |
| PKA            | A-Kinase, cAMP-Dependent Protein Kinase, cyclic AMP depended protein kinase, protein KINASE A                                                                                                                                                                                                                                                                                                                                                                                                                                                                                                                                                                                                                                 |
| TAB1           | 2310012M03Rik, 3'-Tab1, b2b449C, b2b449Clo, Map3k, MAP3K7IP1, TGF-beta activated kinase 1 (MAP3K7) binding protein 1, TGF-beta activated kinase 1/MAP3K7 binding protein 1, TGF Beta-Activated Kinase-Binding Protein 1, TGF-beta activated kinase 1 (MAP3K7) binding protein 1, TGF-beta activated kinase 1/MAP3K7 binding protein 1, TGF beta-Activated Kinase-Binding Protein 1                                                                                                                                                                                                                                                                                                                                            |
| TAB2           | 1110030N06Rik, A530078N03Rik, CHTD2, LOC101928709, Map3k, MAP3K7IP2, mKIAA0733, RP1 111D63, TGF-beta activated kinase 1 (MAP3K7) binding protein 2, TGF-beta activated kinase 1/MAP3K7 binding protein 2, TGF-beta activated kinase 1 (MAP3K7) binding protein 2, TGF-beta activated kinase 1/MAP3K7 binding protein 2                                                                                                                                                                                                                                                                                                                                                                                                        |
| TOLLIP         | 4930403G24Rik, 4931428G15Rik, IL-1RAcPIP, toll interacting protein                                                                                                                                                                                                                                                                                                                                                                                                                                                                                                                                                                                                                                                            |
| TRAF6          | 2310003F17Rik, A1851288, C630032O20Rik, LOC100042930, LOC100048242, MGC:3310, RNF85, TNF receptor-associated factor 6                                                                                                                                                                                                                                                                                                                                                                                                                                                                                                                                                                                                         |

# 

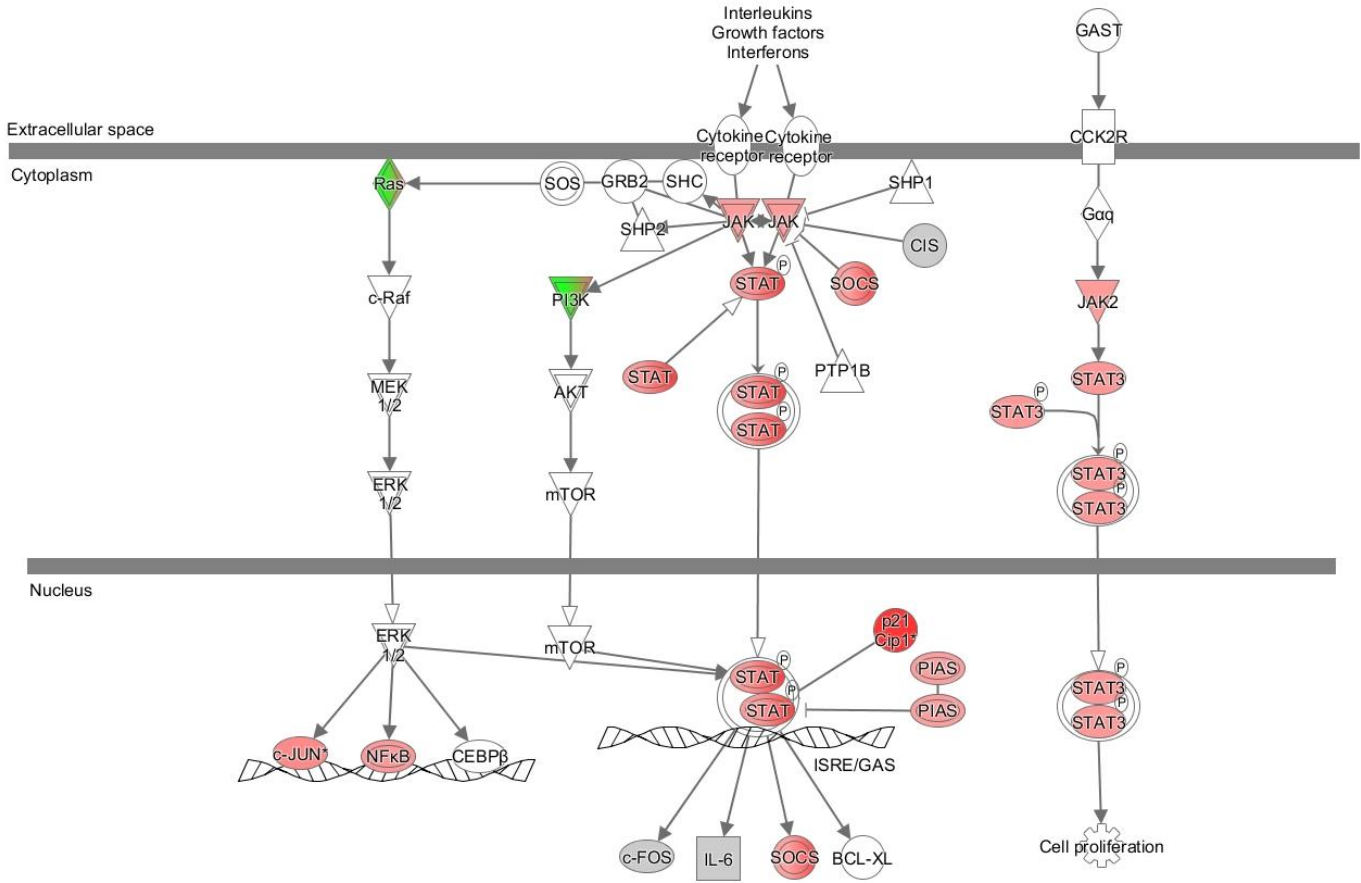

Figure S18. JAK/Stat Signaling at 6 h

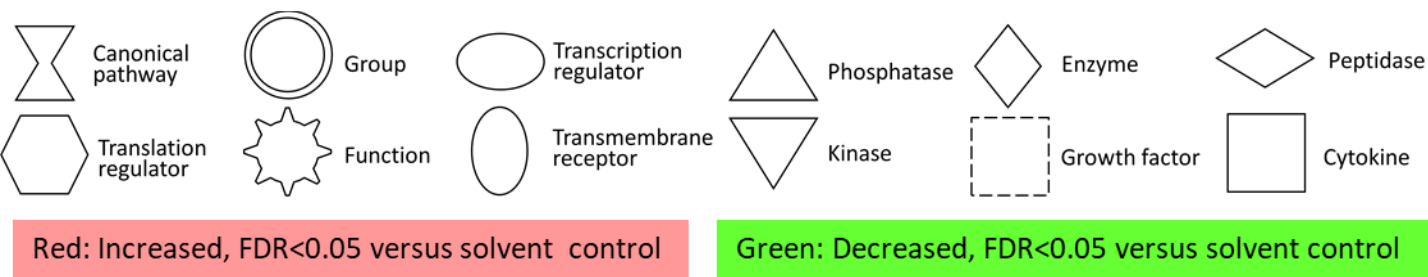

| Symbol      | Synonym(s)                                                                                                                                                                                                                                                                                                                                                                                                                                             |
|-------------|--------------------------------------------------------------------------------------------------------------------------------------------------------------------------------------------------------------------------------------------------------------------------------------------------------------------------------------------------------------------------------------------------------------------------------------------------------|
| AKT         | AKT1/2/3, B/Akt, PKB, RAC-PK                                                                                                                                                                                                                                                                                                                                                                                                                           |
| BCL2L1      | bBclxl, Bcl, BCL2L, BCL2-like 1, BCLX, Bcl-X beta, Bclx gamma, BCL-XL/S, Bcl-X β, Bclx γ, PPP1R52                                                                                                                                                                                                                                                                                                                                                      |
| CCKBR       | CCK2, CCK2-R, CCK2 receptor, CCK-B, CCKR-, CCKR-2, cholecystokinin B receptor, Cholrec, GASR                                                                                                                                                                                                                                                                                                                                                           |
| CDKN1A      | CAP, CAP20, CDK, CDKI, Cdkn, CDKN1, CDKNA1, Cl, CIP1, cyclin-dependent kinase inhibitor 1A, cyclin-dependent kinase inhibitor 1A (P21), mda, MDA-6, P2, P21, p21C, p21Cip, p21CIP1, p21W, p21WAF, p21Waf1, PzI Cyclin-Dependent Kinase Inhibitor, SD, SDI1, UV96, Waf, WAF1                                                                                                                                                                            |
| CEBPB       | Agp/eb, ANF-1, ANF-2, CCAAT enhancer binding protein beta, CCAAT/enhancer binding protein beta, CCAAT/enhancer binding protein (C/EBP), beta, CCAAT/enhancer binding protein (C/EBP), β, CCAAT enhancer-binding protein β, CCAAT/enhancer binding protein β, C/EBPbe, C/EBP-beta, C/Ebp Beta-Lip, C/EBP-β, CEBP-β, C/Ebp β-Lip, CR, CRP2, IL-6, IL-6DBP, NF-, NF-IL6, NF-M, TCF5                                                                       |
| CISH        | BACTS2, C, Cl, CIS, CIS-1, cytokine inducible SH2-containing protein, F17, F23, G18, SOCS                                                                                                                                                                                                                                                                                                                                                              |
| ERK1/2      | MAPK p44/42, MAPK p44/p42, p42/44 mapk, P42/p44 erk, P42/p44 mapk, p42/p44 MAP KINASE                                                                                                                                                                                                                                                                                                                                                                  |
| FOS         | AP-1, c-f, C-FOS, D12Rfj, D12Rfj1, FBj osteosarcoma oncogene, Fos proto-oncogene, AP-1 transcription factor subunit, p55                                                                                                                                                                                                                                                                                                                               |
| GAST        | G, GAS, GASTRIN, Gastrin-17, PPG34                                                                                                                                                                                                                                                                                                                                                                                                                     |
| GNAQ        | 1110005L02Rik, 623040102Rik, AA048290, AW060788, CMC1, DKFZp686D0521, Dsk, Dsk1, Dsk10, Gal, G-ALPHA-q, GQA, G protein alpha Q, G protein alpha Q/11, G protein subunit alpha q, G protein subunit α q, G protein α Q, G protein α Q/11, Gq, Gqalpha, Gql, Gq protein alpha subunit, Gq protein α subunit, Gqα, guanine nucleotide binding protein, alpha q polypeptide, guanine nucleotide binding protein, α q polypeptide, G-α-q, Pst receptor, SWS |
| GRB2        | AA048164, ASH, Ash-psi, EGFRBP-GRB2, GRAB2, GRBS, growth factor receptor bound protein 2, MST084, MSTP084, NCKAP2                                                                                                                                                                                                                                                                                                                                      |
| IL6         | BSF-2, CDF, FDGI, HGF, HSF, IFNB2, IFN-beta-2, IFN beta 2A, IFN-β-2, IFN β 2A, Il, ILg6, interleukin-6                                                                                                                                                                                                                                                                                                                                                 |
| JAK         | JAK kinase                                                                                                                                                                                                                                                                                                                                                                                                                                             |
| JAK2        | A1504024, C81284, Fd17, Janus kinase 2, JTK10                                                                                                                                                                                                                                                                                                                                                                                                          |
| Jun         | Activator protein 1, AP-1, API-1, c-ju, cJUN, Junc, jun proto-oncogene, Jun proto-oncogene, AP-1 transcription factor subunit, LOC100288387, LOC100291417, LOC100293034, p39, v-Jun, V-jun Avian Sarcoma Virus 17 Oncogene Homolog, V-jun Sarcoma Virus 17 Oncogene Homolog                                                                                                                                                                            |
| MAP2K1/2    | MEK1/2, MKK1/2                                                                                                                                                                                                                                                                                                                                                                                                                                         |
| MTOR        | 2610315D21Rik, A1327068, fl, Flat, Fr, FRAP, FRAP1, FRAP2, FRB, mechanistic target of rapamycin kinase, RA, RAF, RAFT1, RAPT1, RRAFT1, SKS                                                                                                                                                                                                                                                                                                             |
| NFKB1       | NF-KAPPA B, NF-κ B, nuclear factor-κ b, transcription factor nuclear factor κ b                                                                                                                                                                                                                                                                                                                                                                        |
| PI3K        | 1-phosphatidylinositol 3-kinase, 2.7.1.137, ATP:1-phosphatidyl-1D-myo-inositol 3-phosphotransferase, Phosphatidylinositol 3 kinase, phosphatidylinositol 3'-kinase, PI3-kinase, Ptdlns 3 Kinase, type III phosphoinositide 3-kinase, type I phosphatidylinositol kinase, Vps34p                                                                                                                                                                        |
| PTPN1       | protein-TYROSINE PHOSPHATASE, protein tyrosine phosphatase non-receptor type 1, protein tyrosine phosphatase, non-receptor type 1, PTP-, PTP-1B, PTP1B alpha, PTP1BB, PTP1B α, Ptpase 1, PTPASE 1B, PTP-HA2                                                                                                                                                                                                                                            |
| PTPN11      | 2700084A17Rik, AW536184, BPTP3, CFC, JMML, METCDS, MGC14433, Noonan syndrome 1, NS1, protein tyrosine phosphatase non-receptor type 11, protein tyrosine phosphatase, non-receptor type 11, PTP, PTP-1D, PTP2C, S, SAP-2, Sh, SH-P, SHP-2, SH-PTP2, SH-PTP3, Src homology protein 2, SYP                                                                                                                                                               |
| PTPN6       | 70Z-SHP, hc, HCP, HCPH, HPTP1C, me, protein tyrosine phosphatase non-receptor type 6, protein tyrosine phosphatase, non-receptor type 6, Ptp, PTP-1C, PtpH6, PTPTY-42, SHP, SHP-1, SHP-1L, SH-PTP1, Sr Homology Protein 1 Phosphatase                                                                                                                                                                                                                  |
| RAF1        | 6430402F14Rik, AA990557, BB129353, CMD1NN, c-R, Cra, CRAF, Craf1, D830050J10Rik, leukaemia ONCOGENE HOMOLOG1, LEUKEMIA ONCOGENE HOMOLOG1, NS5, Raf-1 proto-oncogene, serine/threonine kinase, v-, v-Raf, v-raf-leukaemia viral oncogene 1, v-raf-leukemia viral oncogene 1                                                                                                                                                                             |
| SHC1        | p52SHC, p6, p66, p66s, P66shc, Sh, SHC, Shc (46 kDa isoform), SHCA, SHC adaptor protein 1, Shc p66 isoform, src homology 2 domain-containing transforming protein C1                                                                                                                                                                                                                                                                                   |
| SOCS        | JAB                                                                                                                                                                                                                                                                                                                                                                                                                                                    |
| STAT3       | 1110034C02Rik, A, acute-phase response factor, ADMIO, ADMIO1, APRF, AW109958, HIES, MGC16063, signal transducer and activator of transcription 3, Stat3 alpha isoform, Stat3 beta isoform, Stat3 delta, Stat3 α isoform, Stat3 β isoform, Stat3 δ                                                                                                                                                                                                      |
| Stat3-Stat3 | STAT3 dimer                                                                                                                                                                                                                                                                                                                                                                                                                                            |

Pathway Analysis Using IPA Software; canonical pathway

Nucleus

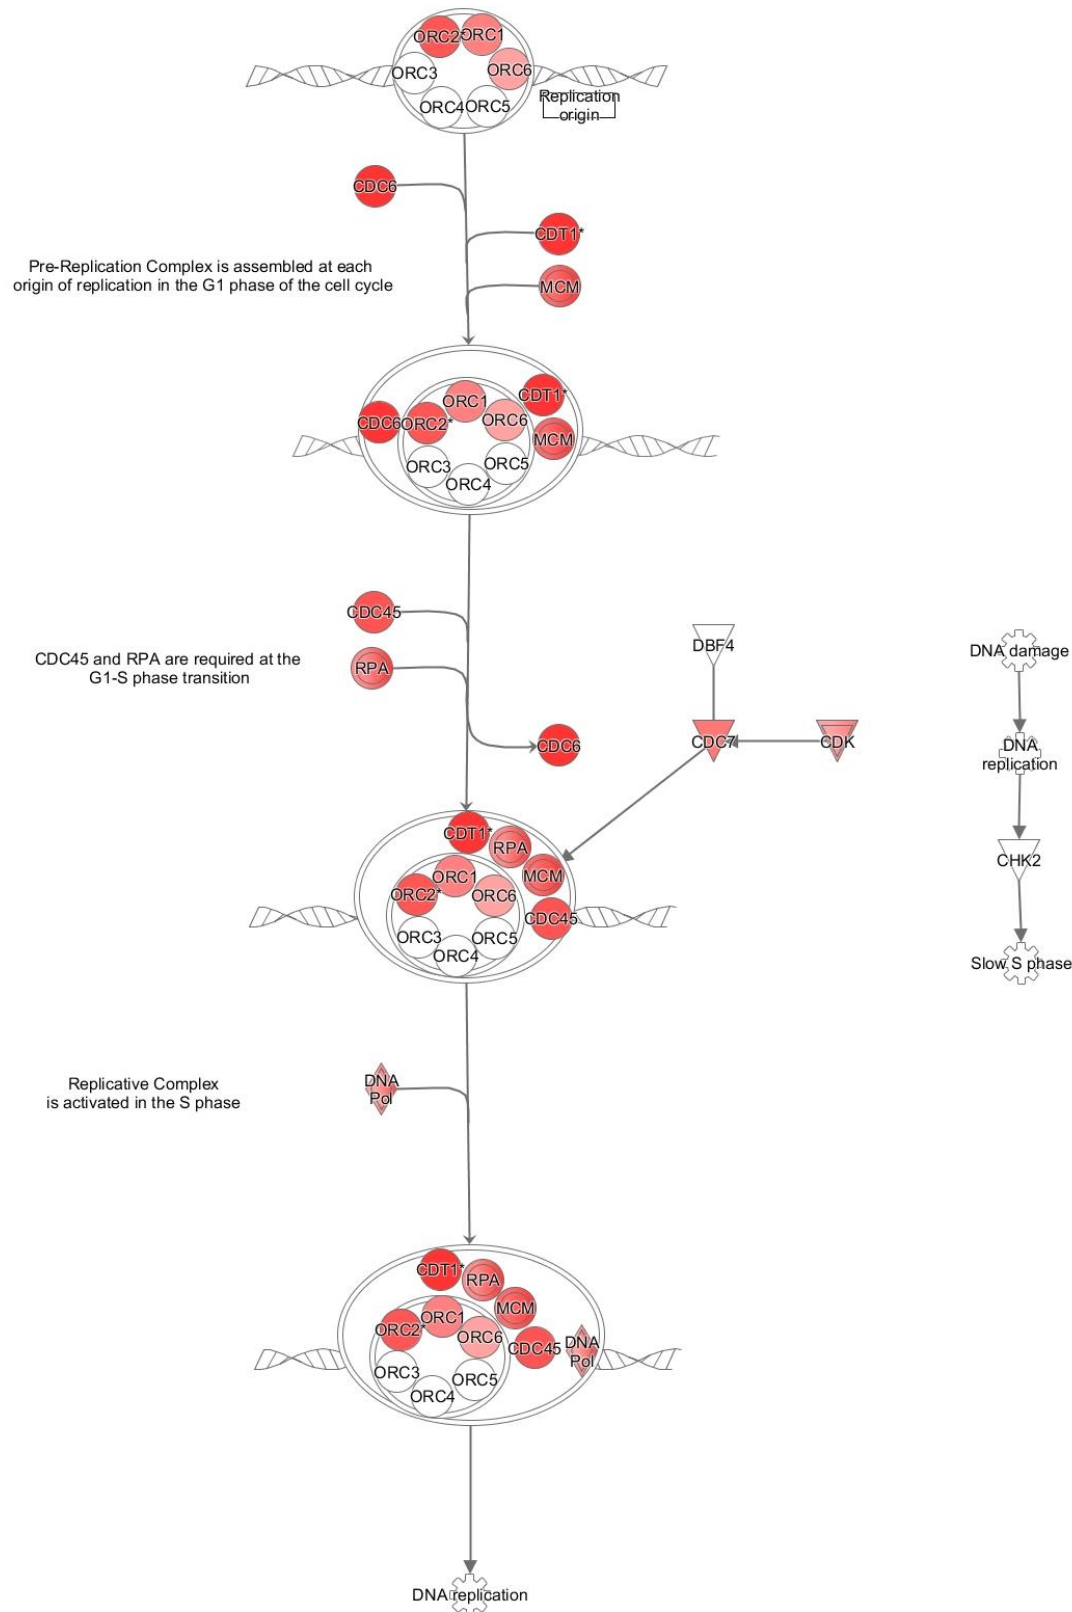

Figure S19. Cell Cycle Control of Chromosomal Replication at 24 h

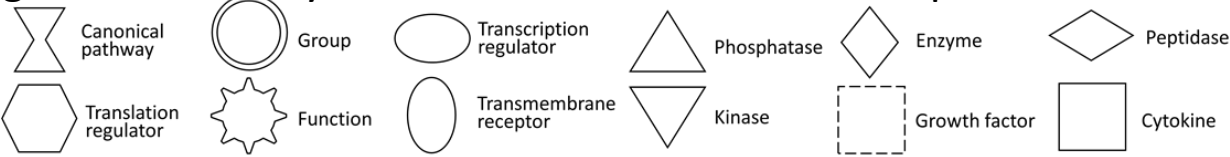

Red: Increased, FDR<0.05 versus solvent control

Green: Decreased, FDR<0.05 versus solvent control



| Symbol                 | Synonym(s)                                                                                                                                        |
|------------------------|---------------------------------------------------------------------------------------------------------------------------------------------------|
| CDC45                  | Cdc45i, CDC45L, CDC45L2, cell division cycle 45, LOC287961, MGORS7, PORC-PI-1                                                                     |
| CDC6                   | CDC18, CDC18L, Cdc6-related, cell division cycle 6, HsCDC18, HsCDC6, MGORS5, p62(cdc6)                                                            |
| CDC7                   | A1597260, Cdc7l, CDC7L1, CDC7-RELATED KINASE, cell division cycle 7, cell division cycle 7 (S. cerevisiae), HsCDC7, Hsk1, huCDC7, muCdc7          |
| CDK                    | Cdks, cyclin-dependent kinase, Cyclin-Dependent Kinases, G1 CDK                                                                                   |
| CDT1                   | 2610318F11Rik, AW545653, C76791, chromatin licensing and DNA replication factor 1, DUP, R, RIS2                                                   |
| CHEK2                  | CDS1, Check2, checkpoint kinase 2, CHK2, hCds1, HUCDS1, LFS2, PP1425, Rad, RAD53                                                                  |
| DBF4                   | A, AA545217, ASK, CHIF, DBF4A, DBF4 zinc finger, LOC100912278, RGD1305854, ZDBF1                                                                  |
| DNA Polymerase         | DNA Pol                                                                                                                                           |
| ORC1                   | AA545195, HSORC1, MmOR, MmORC1, Or, ORC1L, Origin recognition, origin recognition complex subunit 1, origin recognition complex, subunit 1, PARC1 |
| ORC2                   | AU041563, Or, ORC2L, origin recognition complex subunit 2, origin recognition complex, subunit 2                                                  |
| ORC3                   | LAT, LATHEO, Or, ORC3L, origin recognition complex subunit 3, origin recognition complex, subunit 3                                               |
| ORC4                   | mMmOR, mMmORC4, Or, ORC4L, Orc4l2, ORC4P, origin recognition complex subunit 4, origin recognition complex, subunit 4                             |
| ORC5                   | AL033327, MmOR, MmORC5, Or, ORC5L, ORC5P, origin recognition complex subunit 5, origin recognition complex, subunit 5, PPP1R117                   |
| ORC6                   | 6720420I10Rik, Or, ORC6L, origin recognition complex subunit 6, origin recognition complex, subunit 6                                             |
| Prereplicative Complex | pre-RC                                                                                                                                            |

# Pathway Analysis Using IPA Software; canonical pathway

Nucleus

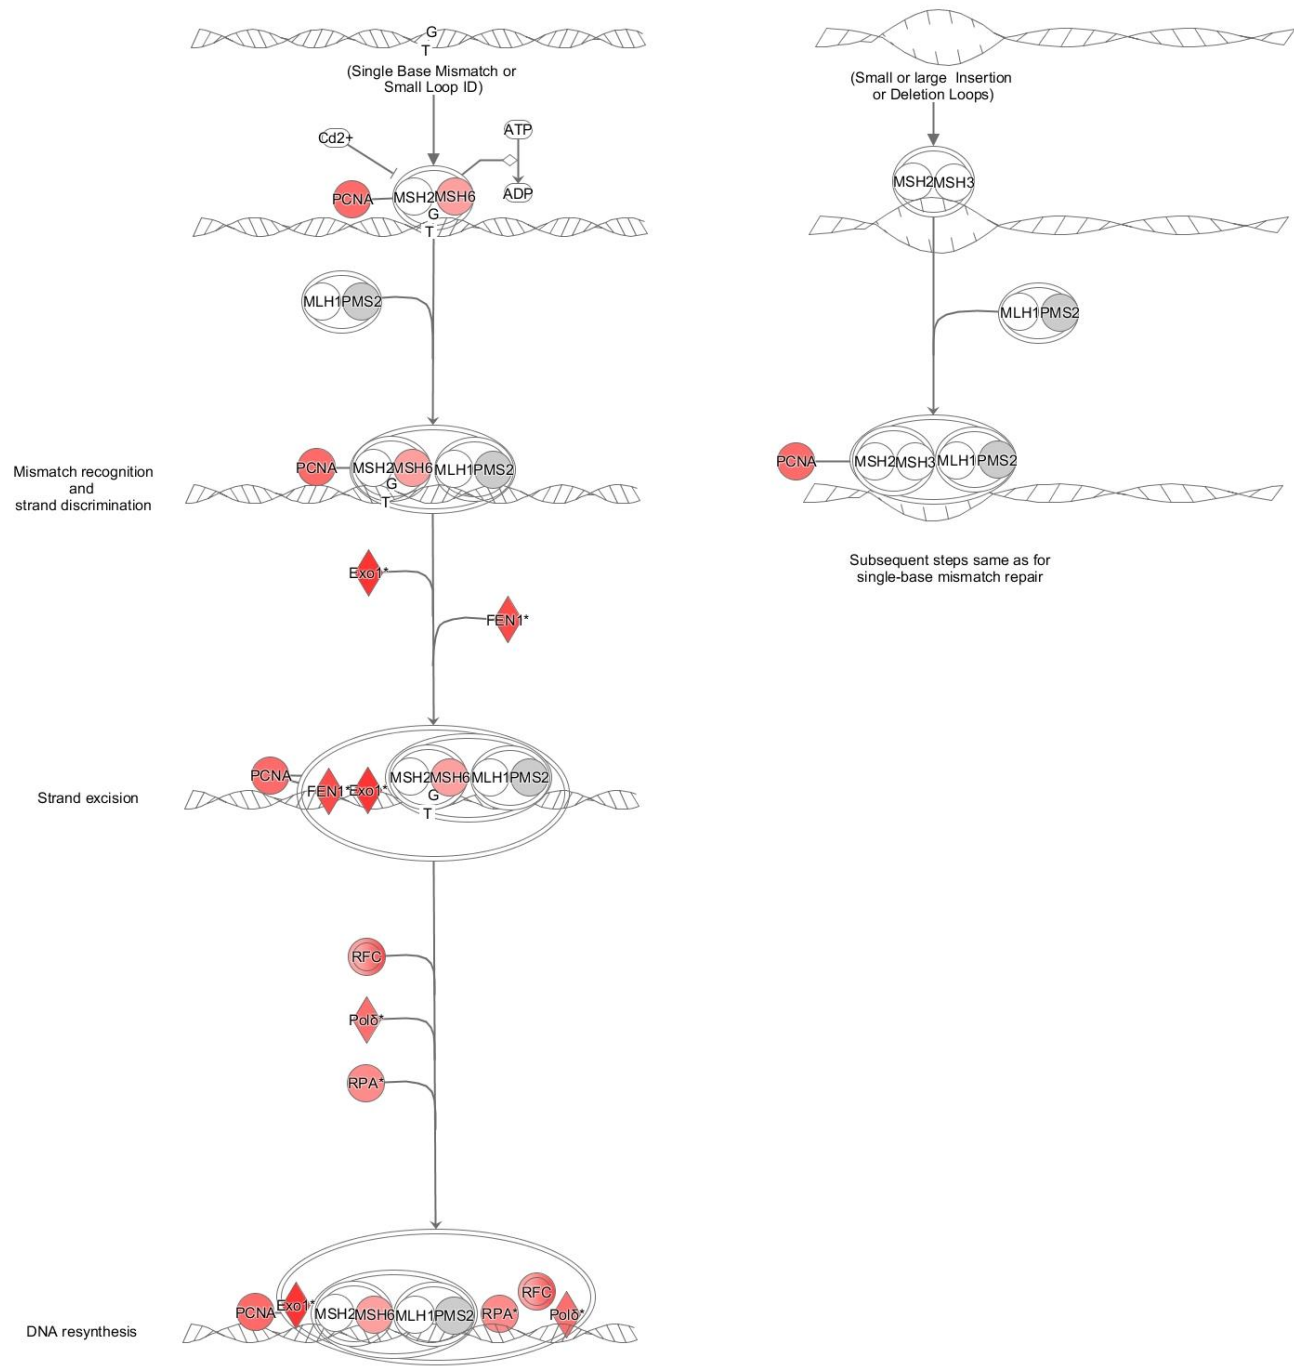

Figure S20. Mismatch Repair in Eukaryotes at 24 h

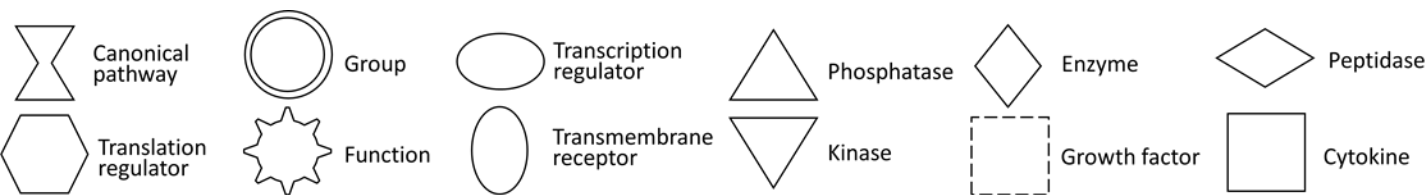

Red: Increased, FDR<0.05 versus solvent control

Green: Decreased, FDR<0.05 versus solvent control

| Symbol                        | Synonym(s)                                                                                                                                                                                                                                                                                                                        |
|-------------------------------|-----------------------------------------------------------------------------------------------------------------------------------------------------------------------------------------------------------------------------------------------------------------------------------------------------------------------------------|
| ADP                           | 20398-34-9, [(2R,3S,4R,5R)-5-(6-aminopurin-9-yl)-3,4-dihydroxyoxolan-2-yl]methyl phosphono hydrogen phosphate, 58-64-0, 9-beta-D-arabinofuranosyladenine 5'-diphosphate, 9-β-D-arabinofuranosyladenine 5'-diphosphate, adenosine 5'-(trihydrogen diphosphate), adenosine diphosphate, C10H15N5O10P2                               |
| ATP                           | [[(2R,3S,4R,5R)-5-(6-aminopurin-9-yl)-3,4-dihydroxyoxolan-2-yl]methoxy-hydroxyphosphoryl] phosphono hydrogen phosphate, 56-65-5, 9-beta-D-arabinofuranosyladenine 5'-triphosphate, 9-β-D-arabinofuranosyladenine 5'-triphosphate, adenosine 5'-(tetrahydrogen triphosphate), adenosine 5'-triphosphate, ATP, ATP4-, C10H16N5O13P3 |
| Cd2+                          | 22537-48-0, cadmium(2+), cadmium acetate, cadmium cation, cadmium ion, cadmium, ion (Cd2+), Cd+2                                                                                                                                                                                                                                  |
| EXO1                          | 5730442G03RIK, exonuclease 1, HEX1, hExoI, M, Msa                                                                                                                                                                                                                                                                                 |
| FEN1                          | AW538437, flap structure-specific endonuclease 1, MF1, RAD2                                                                                                                                                                                                                                                                       |
| MLH1                          | 1110035C23Rik, AI317206, AI325952, AI561766, COCA2, FCC2, hMLH1, HNPCC, HNPCC2, MMRCS1, mutL homolog 1                                                                                                                                                                                                                            |
| MSH2                          | AI788990, COCA1, FCC1, hMSH2, HNPCC, HNPCC1, LCFS2, MMRCS2, mutS homolog 2                                                                                                                                                                                                                                                        |
| MSH3                          | D13Em1, DUP, FAP4, LOC100046843, MRP1, mutS homolog 3, Re, Rep, Rep-3                                                                                                                                                                                                                                                             |
| MSH6                          | AU044881, AW550279, GTB, GTBP, Gtmb, GTMBP, hMSH6, HNPCC5, HSAP, MMRCS3, Msh, mutS homolog 6, p160                                                                                                                                                                                                                                |
| MutLalpha                     | MLH1-PMS2, MutL α                                                                                                                                                                                                                                                                                                                 |
| MutLa-MutSa                   | MutLalpha-MutSalpha                                                                                                                                                                                                                                                                                                               |
| MutLa-MutSa-Exo1-FEN1         | MutLalpha-MutSalpha-Exo1-FEN1                                                                                                                                                                                                                                                                                                     |
| MutLa-MutSa-Exo1-Polδ-RFC-RPA | MutLalpha-MutSalpha-Exo1-Poldelta-RFC-RPA                                                                                                                                                                                                                                                                                         |
| MutLa-MutSβ                   | MutLalpha-MutSbeta                                                                                                                                                                                                                                                                                                                |
| MutSalpha                     | hMutS alpha, hMutS α, MSH2-MSH6, MutS α                                                                                                                                                                                                                                                                                           |
| MutSbeta                      | MutS β                                                                                                                                                                                                                                                                                                                            |
| PCNA                          | ATLD2, Pcna/cyclin, PCNAR, proliferating cell nuclear antigen                                                                                                                                                                                                                                                                     |
| PMS2                          | AW555130, HNPCC4, LOC115486439, MLH4, MMRCS4, PMS1 homolog 2, mismatch repair system component, PMS2CL, PMSL2, Rsph10b                                                                                                                                                                                                            |
| POLD1                         | CDC2, CRCS10, DNA POLYD, DNA POLYMERASE delta, DNA polymerase delta 1, catalytic subunit, DNA POLYMERASE δ, DNA polymerase δ 1, catalytic subunit, MDPL, POLD, polymerase (DNA directed), delta 1, catalytic subunit, polymerase (DNA directed), δ 1, catalytic subunit, Polδ                                                     |
| RPA1                          | 5031405K23Rik, AA589576, AW557552, Cb1-727, HSSB, MST075, p70Rpa1, R, REPA1, replication protein A1, RF, RF-A, RP-A, RPA70                                                                                                                                                                                                        |

# Pathway Analysis Using IPA Software; canonical pathway

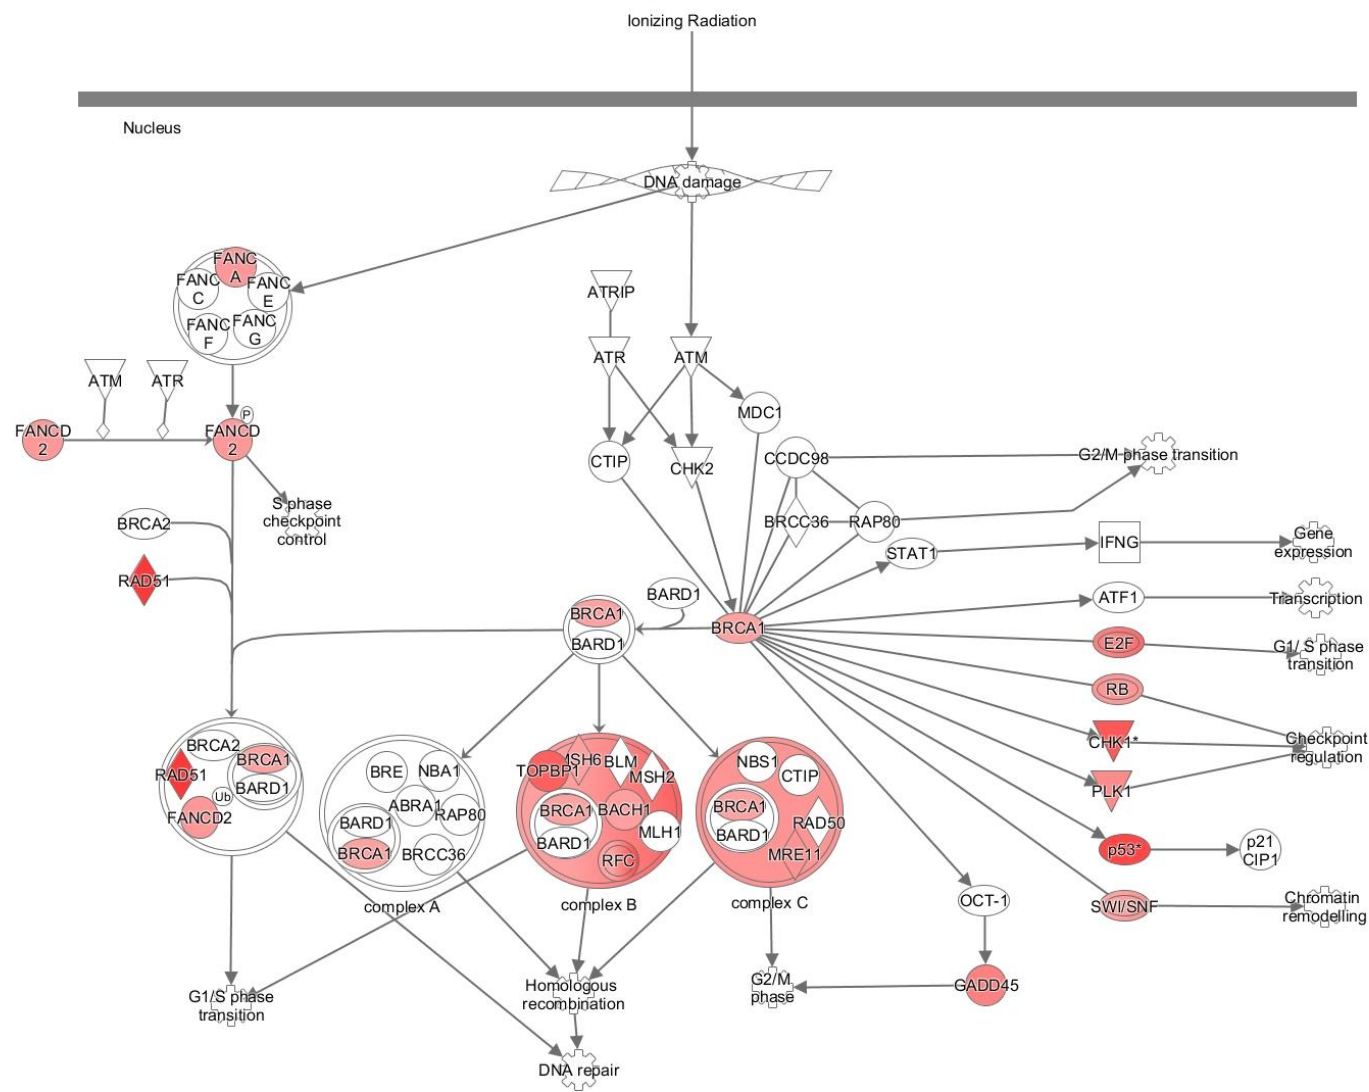

Figure S21. Role of BRCA1 in DNA Damage Response at 24 h

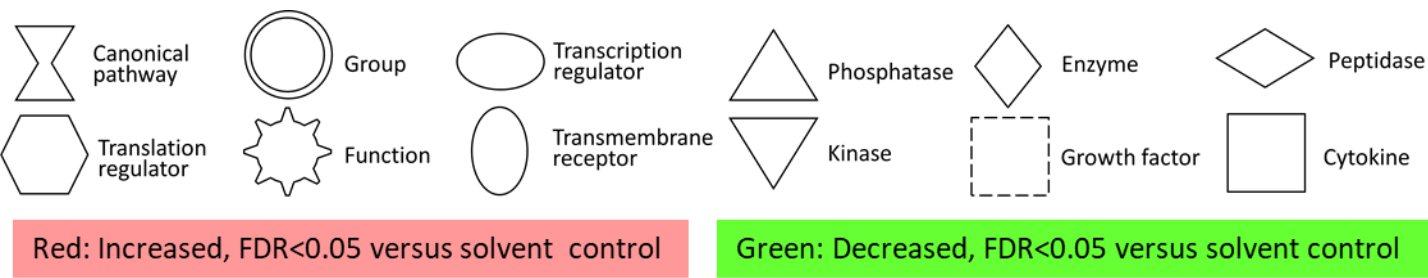

| Symbol   | Synonym(s)                                                                                                                                                                                                                                                                                                                                                                               |
|----------|------------------------------------------------------------------------------------------------------------------------------------------------------------------------------------------------------------------------------------------------------------------------------------------------------------------------------------------------------------------------------------------|
| ABRAXAS1 | 3830405G04RIK, 5630400M01RIK, ABRA1, abraxas 1, BRCA1 A complex subunit, A1506069, AL024423, AV118690, BRCA1 A complex subunit, CCDC98, Fam17, FAM175A, FLJ13614, RGD1305287                                                                                                                                                                                                             |
| ATF1     | activating transcription factor 1, activating transcription factor 1, pseudogene, Atf1-ps, Gm1862, LOC100047705, TREB36                                                                                                                                                                                                                                                                  |
| ATM      | A1256621, AT1, ATA, ataxia telangiectasia mutated, ATC, ATD, ATDC, ATE, ATM serine/threonine kinase, C030026E19RIK, TEL1, TELO1                                                                                                                                                                                                                                                          |
| ATR      | ataxia telangiectasia and Rad3 related, Ataxia-telangiectasia-like, ATR serine/threonine kinase, FCTCS, FRP1, LOC100365674, LOC367198, LOC684113, MEC1, SCKL, SCKL1                                                                                                                                                                                                                      |
| ATRIP    | 6620401K05RIK, ATR interacting protein                                                                                                                                                                                                                                                                                                                                                   |
| BABAM1   | 5430437P03RIK, BRISC and BRCA1 A complex member 1, C19orf62, FLJ20571, HSPC142, MERIT40, NBA1                                                                                                                                                                                                                                                                                            |
| BABAM2   | 6030405P19RIK, A1429776, B830038C02RIK, Br, BRCC4, BRCC45, BRE, BRISC and BRCA1 A complex member 2                                                                                                                                                                                                                                                                                       |
| BARD1    | BRAD1, BRCA1 associated RING domain 1, ENSMUSG00000060893, ENSMUSG00000073653                                                                                                                                                                                                                                                                                                            |
| BLM      | BLM RecQ like helicase, Blooms syndrome, Bloom syndrome, Bloom syndrome, RecQ like helicase, BS, MGRISCE1, RECQ2, RECQL2, RECQL3                                                                                                                                                                                                                                                         |
| BRCA1    | BRCA1 DNA repair associated, BRCA1, DNA repair associated, BRCAI, BRCC1, breast cancer 1, early onset, BROVCA1, FANCS, PNCA4, PPP1R53, PSCP, RNF53                                                                                                                                                                                                                                       |
| BRCA2    | AW045498, BRCA2 DNA repair associated, BRCA2, DNA repair associated, BRCC2, breast cancer 2, early onset, BROVCA2, FACD, FAD, FAD1, Fanc, FANCD, FANCD1, GLM3, PNCA2, RAB1, RAB163, XRCC11                                                                                                                                                                                               |
| BRCC3    | B36, BRCA1/BRCA2-containing complex subunit 3, BRCA1/BRCA2-containing complex, subunit 3, BRCC36, C6.1, C6.1A, CXorf53                                                                                                                                                                                                                                                                   |
| BRIP1    | 3110009N10RIK, 8030460J03RIK, BACH, BACH1, BRCA1 interacting protein C-terminal helicase 1, FACJ, FANCI, OF                                                                                                                                                                                                                                                                              |
| CDKN1A   | CAP, CAP20, CDK, CDK1, Cdkn, CDKN1, CDKNA1, Ci, CIP1, cyclin-dependent kinase inhibitor 1A, cyclin-dependent kinase inhibitor 1A (P21), mda, MDA-6, P2, P21, p21C, p21Cip, p21CIP1, p21W, p21WAF, p21Waf1, Pz1 Cyclin-Dependent Kinase Inhibitor, SD, SDI1, UV96, Waf, WAF1                                                                                                              |
| CHEK1    | C85740, checkpoint kinase 1, CHK1, rad27                                                                                                                                                                                                                                                                                                                                                 |
| CHEK2    | CDS1, Check2, checkpoint kinase 2, CHK2, hCds1, HUCDS1, LFS2, PP1425, Rad, RAD53                                                                                                                                                                                                                                                                                                         |
| FA       | FA Core Complex                                                                                                                                                                                                                                                                                                                                                                          |
| FANCA    | AW208693, FA, FA1, FAA, FACA, FA complementation group A, FA-H, FANCH, Fanconi anaemia, complementation group A, Fanconi anemia, complementation group A                                                                                                                                                                                                                                 |
| FANCC    | FA3, FAC, FACC, FA complementation group C, Fanconi anaemia, complementation group C, Fanconi anemia, complementation group C                                                                                                                                                                                                                                                            |
| FANCD2   | 2410150O07RIK, AU015151, BB137857, FA4, FACD, FA complementation group D2, FAD, FA-D2, FANCD, Fanconi anaemia, complementation group D2, Fanconi anemia, complementation group D2                                                                                                                                                                                                        |
| FANCE    | 2810451D06RIK, A1415634, AW209126, FACE, FA complementation group E, FAE, Fanconi anaemia, complementation group E, Fanconi anemia, complementation group E, RGD1561045                                                                                                                                                                                                                  |
| FANCF    | A730016A17, FA complementation group F, FAF, Fanconi anaemia, complementation group F, Fanconi anemia, complementation group F, RGD1561456                                                                                                                                                                                                                                               |
| FANCG    | AU041407, FA complementation group G, FAG, Fanconi anaemia, complementation group G, Fanconi anemia, complementation group G, LOC684204, Xrcc, XRCC9                                                                                                                                                                                                                                     |
| GADD45A  | AA545191, Ddit, DDIT1, Gadd, GADD45, GADD45 alpha, GADD45α, growth arrest and DNA-damage-inducible 45 alpha, growth arrest and DNA-damage-inducible 45 α, Growth arrest and DNA-damage-inducible 45, α, growth arrest and DNA damage inducible alpha, growth arrest and DNA-damage-inducible, alpha, growth arrest and DNA damage inducible α, growth arrest and DNA-damage-inducible, α |
| IFNG     | If, If2f, IFG, IFI, IFN-2, IFNG2, IFN gamma, IFN-II, IFN type II, IFN-γ, IMD69, INF-γ, Interferon gamma, Interferon γ, type II INTERFERON, γ-ifn, γ interferon                                                                                                                                                                                                                           |
| MDC1     | 6820401C03, AA413496, mediator of DNA damage checkpoint 1, mKIAA0170, NFB, NFB1                                                                                                                                                                                                                                                                                                          |
| MLH1     | 1110035C23RIK, A1317206, A1325952, A1561766, COCA2, FCC2, hMLH1, HNPCC, HNPCC2, MMRCS1, mutL homolog 1                                                                                                                                                                                                                                                                                   |
| MRE11    | ATLD, HNGS1, MRE11A, MRE11A homolog A, double strand break repair nuclease, MRE11B, MRE11 homolog, double strand break repair nuclease                                                                                                                                                                                                                                                   |
| MSH2     | A1788990, COCA1, FCC1, hMSH2, HNPCC, HNPCC1, LCFS2, MMRCS2, mutS homolog 2                                                                                                                                                                                                                                                                                                               |
| MSH6     | AU044881, AW550279, GTB, GTBP, Gtmb, GTMBP, hMSH6, HNPCC5, HSAP, MMRCS3, Msh, mutS homolog 6, p160                                                                                                                                                                                                                                                                                       |
| NBN      | ATV, AT-V1, AT-V2, Nb, NBS, NBS1, NIBRIN, P95                                                                                                                                                                                                                                                                                                                                            |
| PLK1     | P, PLK, polo-like kinase 1, STPK, STPK13                                                                                                                                                                                                                                                                                                                                                 |
| POU2F1   | 2810482H01RIK, LOC100503933, NF-A1, Oct-, OCT1, oct-1B, Otf-, OTF1, POU class 2 homeobox 1, POU domain, class 2, transcription factor 1                                                                                                                                                                                                                                                  |
| RAD50    | hRad50, Mr, Mrell, NBSLD, Rad, RAD502, RAD50 double strand break repair protein, Rad50l                                                                                                                                                                                                                                                                                                  |
| RAD51    | AV304093, BRCC5, FANCR, HRAD51, HsRad51, HsT16930, MRMV2, Rad, RAD51A, RAD51 recombinase, Re, RECA, RECA-LIKE, RGD1563603                                                                                                                                                                                                                                                                |
| RB       | pRb, Rb Tumor Suppressor, Rb tumour Suppressor                                                                                                                                                                                                                                                                                                                                           |
| RBBP8    | 9930104E21RIK, COM1, Ct, CTIP, JWDS, RB binding protein 8, endonuclease, Rbbp8-rs, retinoblastoma binding protein 8, endonuclease, RGD1308872, RIM, SAE2, SCKL2                                                                                                                                                                                                                          |
| STAT1    | 2010005J02RIK, AA408197, CANDF7, DD6G4-4, IMD31A, IMD31B, IMD31C, ISGF-3, p91, signal transducer and activator of transcription 1, STAT1 alpha, Stat1 beta, Stat1 p91, STAT1 α, Stat1 β, STAT91, TRANSCRIPTION FACTOR SIGNAL TRANSDUCER and ACTIVATOR                                                                                                                                    |
| Swi-Snf  | SWI/SNF                                                                                                                                                                                                                                                                                                                                                                                  |
| TOPBP1   | 1110031N14RIK, 2810429C13RIK, A1256758, D430026L04RIK, DNA topoisomerase II binding protein 1, Dpb11, mKIAA0259, RGD1562949, TOP2BP1, TOPO2 BP, TOPOISOMERASE2 binding, topoisomerase (DNA) II binding protein 1                                                                                                                                                                         |
| TP53     | bbl, BCC7, bfy, bhy, BMFS5, LFS1, p4, p44, p5, P53, P53 cellular tumour antigen, p53 tumor suppressor, transformation related protein 53, TRP53, tumor protein p53, tumour protein p53                                                                                                                                                                                                   |
| UIMC1    | 9430016E08RIK, D330018D10RIK, D630032M02RIK, RAP80, RETINOID X receptor INTERACTING, RGD1307009, RIP110, Rxri, Rxrip110, ubiquitin interaction motif containing 1, X2HRIP110                                                                                                                                                                                                             |

## Mutations in Hereditary Breast Cancer

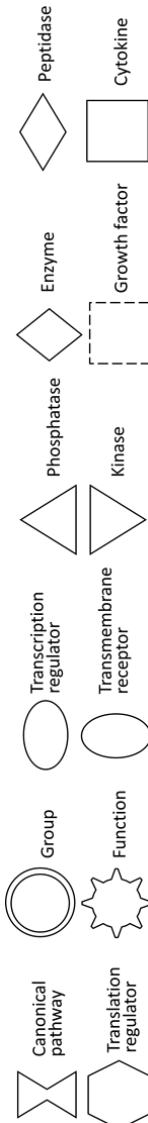

Green: Decreased, FDR<0.05 versus control

| Symbol                   | Synonym(s)                                                                                                                                                                                                                                                                      |
|--------------------------|---------------------------------------------------------------------------------------------------------------------------------------------------------------------------------------------------------------------------------------------------------------------------------|
| 14-3-3u03C3-CyclinB-CDC2 | 14-3-3sigma-Cyclin B-CDC2                                                                                                                                                                                                                                                       |
| AKT                      | AKT1/2/3, B/Akt, PKB, RAC-PK                                                                                                                                                                                                                                                    |
| ATM                      | A1256621, AT1, ATA, ataxia telangiectasia mutated, ATC, ATD, ATDC, ATE, ATM serine/threonine kinase, C030026E19RIK, TEL1, TELO1                                                                                                                                                 |
| ATR                      | ataxia telangiectasia and Rad3 related, Ataxia-telangiectasia-like, ATR serine/threonine kinase, FCTCS, FRP1, LOC100365674, LOC367198, LOC684113, MEC1, SCKL, SCKL1                                                                                                             |
| BRAD1                    | BRAD1, BRCA1 associated RING domain 1, ENSMUSG0000060893, ENSMUSG0000073653                                                                                                                                                                                                     |
| BLM                      | BLM RecQ like helicase, Blooms syndrome, Bloom syndrome, Bloom syndrome, RecQ like helicase, BS, MGRISCE1, RECQ2, RECQL2, RECQL3                                                                                                                                                |
| BRCA1                    | BRCA1 DNA repair associated, BRCA1, DNA repair associated, BRCA1, BRCC1, breast cancer 1, early onset, BROVCA1, FANCS, PNCA4, PPP1R53, PSCP, RNF53                                                                                                                              |
| BRCA2                    | AW045498, BRCA2 DNA repair associated, BRCA2, DNA repair associated, BRCC2, breast cancer 2, early onset, BROVCA2, FACD, FAD, FAD1, Fanc, FANCD, FANCD1, GLM3, PNCA2, RAB1, RAB163, XRCC11                                                                                      |
| CBP/p300                 | CBP, CBP-p300                                                                                                                                                                                                                                                                   |
| CCNB1                    | CCNB, Ccnb1-ps, Ccnb1-r, CCNB1-RS1, Ccnb1-rs13, CycB1, Cycb1-rs1, Cycb-4, Cycb-5, CYCLIN B, CYCLIN B1, cyclin B1, pseudogene, Cyclin b4, EG434175, Gm5593                                                                                                                       |
| CCND1                    | A1327039, B-CELL CLL/LYMPHOMA 1, bcl-, BCL1, cD1, CycD1, CYCLIN D1, Cyl-, Cyl-1, D11S287E, G1/S-Specific Cyclin D1, PR, PRAD1, U21B31                                                                                                                                           |
| CDC25C                   | CDC25, cdc25c-64, cell division cycle 25C, PPP1R60                                                                                                                                                                                                                              |
| CDKN1A                   | CAP, CAP20, CDK, CDKI, Cdkn, CDKN1, CDKNA1, Cl, CIP1, cyclin-dependent kinase inhibitor 1A, cyclin-dependent kinase inhibitor 1A (P21), mda, MDA-6, P2, P21, p21C, p21Cip1, p21CIP1, p21W, p21WAF, p21WAF1, Pz1 Cyclin-Dependent Kinase Inhibitor, SD, SDI1, UV96, Waf, WAF1    |
| CHEK1                    | C85740, checkpoint kinase 1, CHK1, rad27                                                                                                                                                                                                                                        |
| CHEK2                    | CDS1, Check2, checkpoint kinase 2, CHK2, hCds1, HUCDS1, LFS2, PP1425, Rad, RAD53                                                                                                                                                                                                |
| Cyclinb1/Cdc2            | Cyclin B1-Cdc2                                                                                                                                                                                                                                                                  |
| DDB2                     | 2610043A19Rik, damage specific DNA binding protein 2, DDBB, p4, UV-DDB2, XPE                                                                                                                                                                                                    |
| E2F1                     | E2f, E2F transcription factor 1, mKIAA4009, RBAP1, RBBP3, RBP3, Tg(Wnt1-cre)2Sor                                                                                                                                                                                                |
| FA                       | FA Core Complex                                                                                                                                                                                                                                                                 |
| FAAP100                  | 2310003H01Rik, C17orf70, FA core complex associated protein 100, Fanconi anaemia core complex associated protein 100, Fanconi anemia core complex associated protein 100, RGD1306926                                                                                            |
| FAAP24                   | AW124591, AW538696, C19orf40, C230052112Rik, FA core complex associated protein 24, Fanconi anaemia core complex associated protein 24, Fanconi anemia core complex associated protein 24, RGD1564719                                                                           |
| FANCA                    | AW208693, FA, FA1, FAA, FACA, FA complementation group A, FA-H, FANCH, Fanconi anaemia, complementation group A, Fanconi anemia, complementation group A                                                                                                                        |
| FANCB                    | BC022692, FA2, FAAP90, FAAP95, FAB, FACB, FA complementation group B, Fanconi anaemia, complementation group B, Fanconi anemia, complementation group B, FLJ34064, RGD1561555                                                                                                   |
| FANCC                    | FA3, FAC, FACC, FA complementation group C, Fanconi anaemia, complementation group C, Fanconi anemia, complementation group C                                                                                                                                                   |
| FANCD2                   | 2410150O07RIK, AU015151, BB137857, FA4, FACD, FA complementation group D2, FAD, FA-D2, FANCD, Fanconi anaemia, complementation group D2, Fanconi anemia, complementation group D2                                                                                               |
| FANCE                    | 2810451D06RIK, AI415634, AW209126, FACE, FA complementation group E, FAE, Fanconi anaemia, complementation group E, Fanconi anemia, complementation group E, RGD1561045                                                                                                         |
| FANCF                    | A730016A17, FA complementation group F, FAF, Fanconi anaemia, complementation group F, Fanconi anemia, complementation group F, RGD1561456                                                                                                                                      |
| FANCG                    | AU041407, FA complementation group G, FAG, Fanconi anaemia, complementation group G, Fanconi anemia, complementation group G, LOC684204, Xcc, XRCC9                                                                                                                             |
| FANCL                    | 2010322C19RIK, AW554273, B230118H11RIK, FAAP43, FA complementation group L, Fanconi anaemia, complementation group L, Fanconi anemia, complementation group L, FLJ10335, gcd, P, Phf, PHF9, POG                                                                                 |
| FANCM                    | AI427100, C730036B14RIK, D12Erd364, D12Erd364e, FAAP250, FA complementation group M, Fanconi anaemia, complementation group M, Fanconi anemia, complementation group M, KIAA1596, POF15, SPGF28                                                                                 |
| H2AX                     | AW228881, gammaH, Gamma-h2afx, gamma-H2AX, gamma-H2A.X, H2af, H2AFX, H2A/X, H2A.X, H2A.X variant histone, Hist5-, RGD1566119, y-h2afx, y-H2AX, y-H2A.X                                                                                                                          |
| HDAC                     | Histone Deacetylase, Histone deacetyltransferase                                                                                                                                                                                                                                |
| MLH1                     | 1110035C23RIK, AI317206, AI325952, AI561766, COCA2, FCC2, hMLH1, HNPCC, HNPCC2, MMRCS1, mutL homolog 1                                                                                                                                                                          |
| MRE11                    | ATLD, HNGS1, MRE11A, MRE11A homolog A, double strand break repair nuclease, MRE11B, MRE11 homolog, double strand break repair nuclease                                                                                                                                          |
| MRN                      | MRE11-Rad50-NBS1, NBS1-Rad50-MRE11                                                                                                                                                                                                                                              |
| MSH2                     | AI788990, COCA1, FCC1, hMSH2, HNPCC, HNPCC1, LCFS2, MMRCS2, mutS homolog 2                                                                                                                                                                                                      |
| MSH6                     | AU044881, AW550279, GTB, GTBP, Gtmb, GTMBP, hMSH6, HNPCC5, HSAP, MMRCS3, Msh, mutS homolog 6, p160                                                                                                                                                                              |
| MutL alpha               | MLH1-PMS2, MutL α                                                                                                                                                                                                                                                               |
| MutS alpha               | hMutS alpha, hMutS α, MSH2-MSH6, MutS α                                                                                                                                                                                                                                         |
| NBN                      | ATV, AT-V1, AT-V2, Nb, NBS, NBS1, NIBRIN, P95                                                                                                                                                                                                                                   |
| NPM1                     | B23, B23.1, B23NP, NO, NO38, NPM, Nucleolar protein B23.2, NUCLEOPHOSMIN, nucleophosmin 1, NUMATRIN                                                                                                                                                                             |
| PALB2                    | 4732427B05, BC066140, FANCN, FLJ21816, partner and localizer of BRCA2, PNCA3, RGD1304759                                                                                                                                                                                        |
| PI3K                     | 1-phosphatidylinositol 3-kinase, 2.7.1.137, ATP:1-phosphatidyl-1D-myo-inositol 3-phosphotransferase, Phosphatidylinositol 3 kinase, phosphatidylinositol 3'-kinase, PI3-kinase, PtdIns 3 Kinase, type III phosphoinositide 3-kinase, type I phosphatidylinositol kinase, Vps34p |
| PIP2                     | 1,2-diacyl-sn-glycero-3-phospho-(1'-myo-inositol-4',5'-bisphosphate), 1-O-(3-sn-phosphatidyl)-1D-myo-inositol 4,5-bis(dihydrogen phosphate), 1-phosphatidyl-1D-myo-inositol 4,5-bisphosphate, C11H19O19P3R2                                                                     |
| PIP3                     | 1-phosphatidyl-1D-myo-inositol 3,4,5-trisphosphate, phosphatidylinositol-3,4,5-trisphosphate, phosphoinositide (3,4,5) P3, PI(3,4,5)P3, Plns(3,4,5)P3, PIP3, PtdIns(3,4,5)P3                                                                                                    |
| PMS2                     | AW555130, HNPCC4, LOC115486439, MLH4, MMRCS4, PMS1 homolog 2, mismatch repair system component, PMS2CL, PMSL2, RspH10b                                                                                                                                                          |
| PTEN                     | 10q23del, 2310035O07RIK, A130070J02RIK, AI463227, B430203M17RIK, BZS, CWS1, DEC, GLM2, MHAM, MMAC, MMAC1, MUTATED IN MULTIPLE ADVANCED CANCERS, mutated in multiple advanced cancers 1, phosphatase and tensin homolog, PTEN1, PTENbeta, TEP, TEP1                              |
| RAD50                    | hRad50, Mr, Mrell, NBSLD, Rad, RAD502, RAD50 double strand break repair protein, Rad50I                                                                                                                                                                                         |
| RAD51                    | AV304093, BRCC5, FANCR, HRAD51, HsRad51, HsT16930, MRMV2, Rad, RAD51A, RAD51 recombinase, Re, RECA, RECA-LIKE, RGD1563603                                                                                                                                                       |
| RB1                      | OSRC, p, p105, p105-Rb, p110 RB, p110-RB1, pp105, pp110, PPP1R130, pRb, R, RB, RB-ASSOCIATED, RB transcriptional corepressor 1, Retinoblastome tumor-suppression protein rb                                                                                                     |
| RNApolymersell           | POL II, Polymerase II, RNAP-II, RNA POL II, RPase2                                                                                                                                                                                                                              |
| SFN                      | 14-3-3, 14-3-3 Sigma, 14-3-3 σ, E, ER, HME1, Mme1, Stratifin, Ywh, YWHAS                                                                                                                                                                                                        |
| Swi-Snf                  | SWI/SNF                                                                                                                                                                                                                                                                         |
| TP53                     | bb1, BCC7, bfy, bhy, BMFS5, LFS1, p4, p44, p5, P53, P53 cellular tumour antigen, p53 tumor suppressor, transformation related protein 53, TRP53, tumor protein p53, tumour protein p53                                                                                          |
| TUBG1                    | 1500010O08RIK, AI451582, AI503389, CDCBM4, Gamma-1 tubulin, Gamma-tubulin, GCP-1, TUBG, TUBGCP1, Tubulin gamma, tubulin gamma 1, tubulin, gamma 1, Tubulin γ, tubulin γ 1, tubulin, γ 1, γ-1 tubulin, γ-Tubulin                                                                 |
| Ubiquitin                | Polyubiquitin, Ub                                                                                                                                                                                                                                                               |
| WEE1                     | WEE1A, Wee1b, WEE1 G2 checkpoint kinase, WEE 1 homolog 1 (S. pombe), WEE1hu, WEE1-LIKE protein KINASE                                                                                                                                                                           |
| XPC                      | p125, RAD4, xeroderma pigmentosum, complementation group C, XP3, XPCC, XPC complex subunit, DNA damage recognition and repair factor                                                                                                                                            |



Pathway Analysis Using IPA Software; canonical pathway

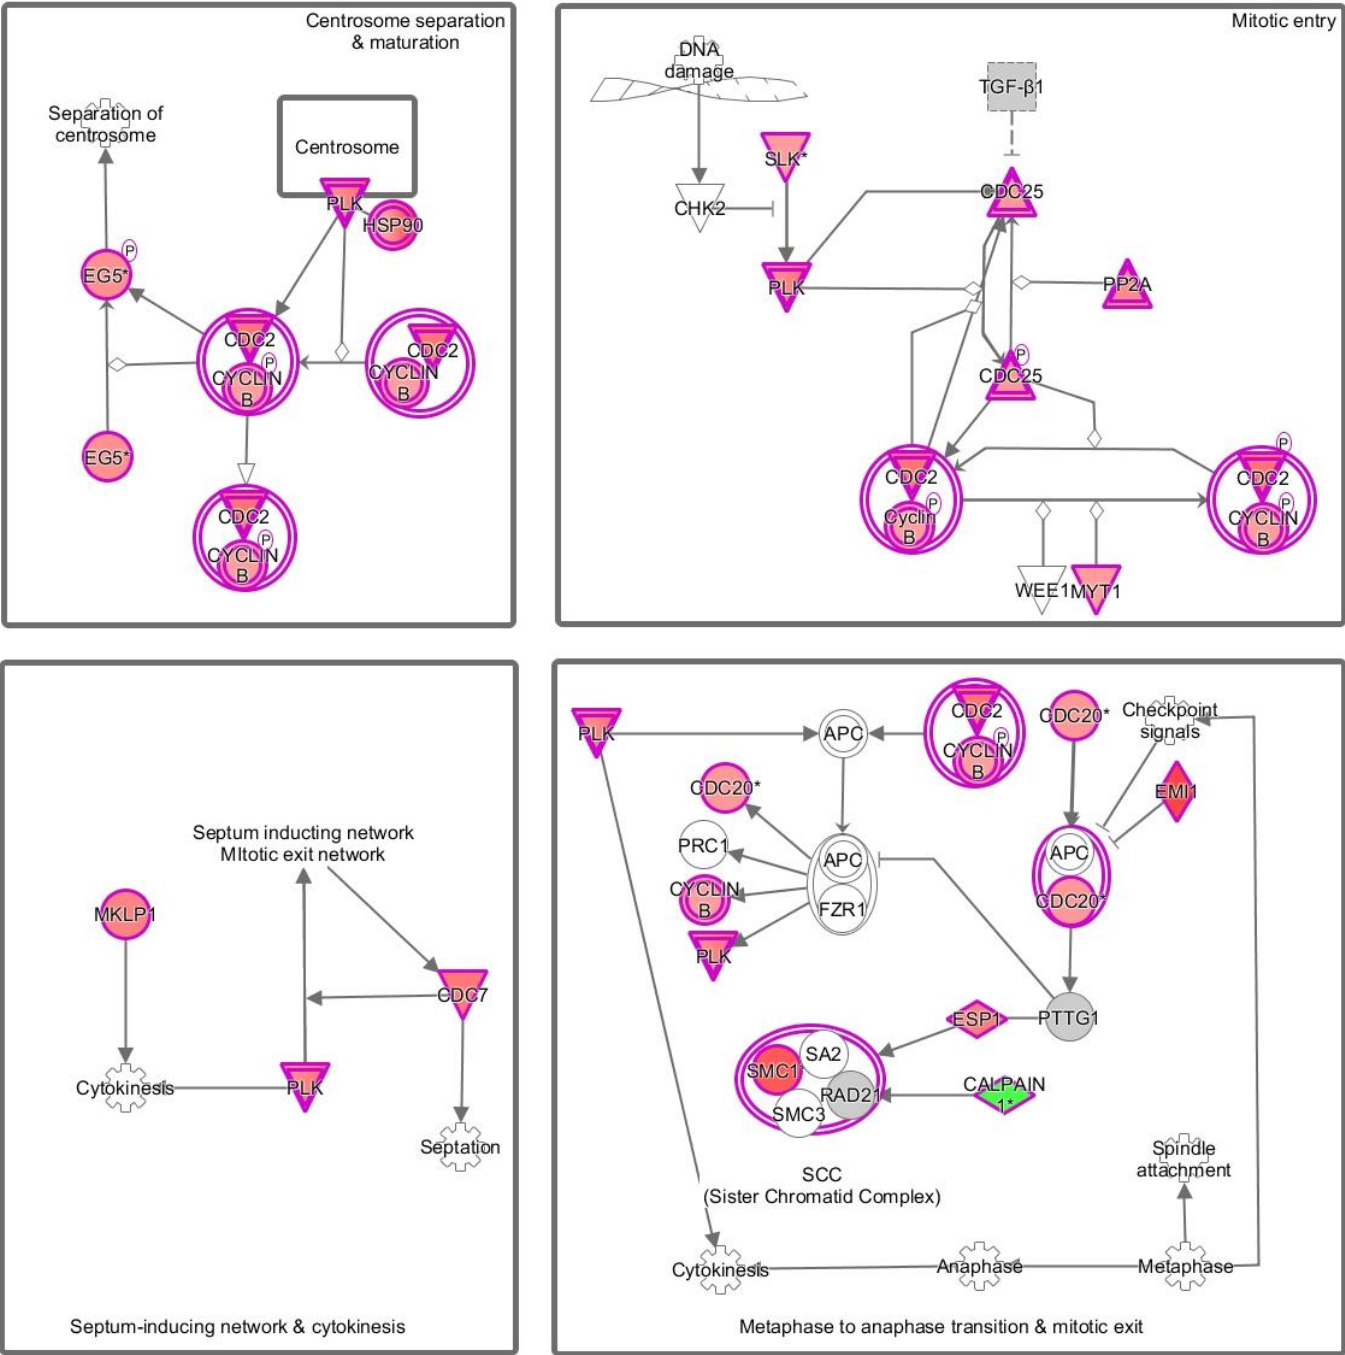

Figure S23. Mitotic Roles of Polo-Like Kinase at 24 h

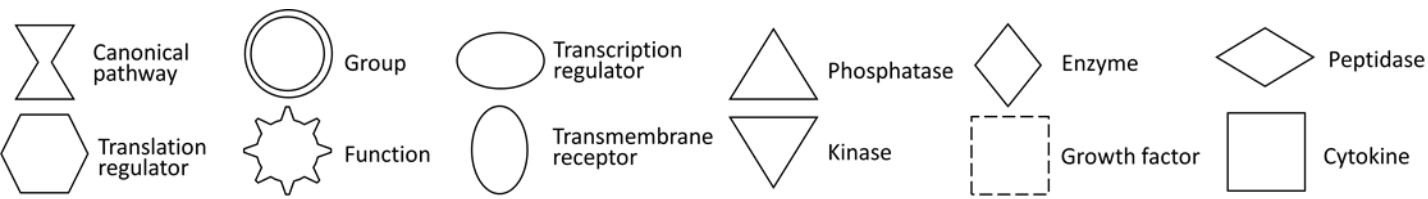

Red: Increased, FDR<0.05 versus solvent control

Green: Decreased, FDR<0.05 versus solvent control

| Symbol    | Synonym(s)                                                                                                                                                                                                                                                                                                                         |
|-----------|------------------------------------------------------------------------------------------------------------------------------------------------------------------------------------------------------------------------------------------------------------------------------------------------------------------------------------|
| APC       | Anaphase Promoting Complex, Anaphase Promoting Complex/Cyclosome, APC-C, APC/C, APC holoprotein                                                                                                                                                                                                                                    |
| APC-CDC20 | Anaphase promoting complex-CDC20                                                                                                                                                                                                                                                                                                   |
| APC-FZR1  | Anaphase promoting complex-FZR1                                                                                                                                                                                                                                                                                                    |
| CAPN1     | Ca, CALCIUM ACTIVATED NEUTRAL PROTEASE, Calpain-1, CALPAIN I, CANP, CANP1, CANPL1, Cap, Capa-1, mu-c, MU-CALPAIN, mu-calpin, muCANP, muCL, SPG76                                                                                                                                                                                   |
| CDC20     | 2310042N09Rik, bA276H19.3, C87100, CDC20A, cell division cycle 20, p55CD, p55CDC                                                                                                                                                                                                                                                   |
| CDC25     | mRNA encoding Cdc25-like                                                                                                                                                                                                                                                                                                           |
| CDC7      | A1597260, Cdc7I, CDC7L1, CDC7-RELATED KINASE, cell division cycle 7, cell division cycle 7 (S. cerevisiae), HsCDC7, Hsk1, huCDC7, muCdc7                                                                                                                                                                                           |
| CHEK2     | CDS1, Check2, checkpoint kinase 2, CHK2, hCds1, HUCDS1, LFS2, PP1425, Rad, RAD53                                                                                                                                                                                                                                                   |
| ESPL1     | AL024103, AU045071, Ce, CERP, ES, ESP1, extra spindle pole bodies 1, separase, extra spindle pole bodies like 1, separase, LOC100912244, PR, PRCE, S, se, SEPA, SEPARASE, SSE                                                                                                                                                      |
| FBXO5     | 2510044I10Rik, C85305, Emi, EMI1, F-box protein 5, FBX5, Fbxo3, Fbxo31                                                                                                                                                                                                                                                             |
| FZR1      | AW108046, CDC20C, CDH1, Cdh1/Hct1 homolog, fizzy and cell division cycle 20 related 1, Fy, FYR, FZR, FZR2, HCDH, HCDH1, HCT1                                                                                                                                                                                                       |
| HSP90     | HSC90, Hsp84                                                                                                                                                                                                                                                                                                                       |
| KIF11     | EG5, HKSP, Kif, Kif8, Kifl1, Kinesin-5, kinesin family member 11, Kn, KNSL1, MCLMR, TRIP5                                                                                                                                                                                                                                          |
| KIF23     | 3110001D19Rik, C87313, CHO, CHO1, kinesin family member 23, Kinesin-like 5, Kn, KNSL5, MKL, MKLP, MKLP-1                                                                                                                                                                                                                           |
| MPF       | M-Phase Promoting Factor                                                                                                                                                                                                                                                                                                           |
| PKMYT1    | 6230424P17, AW209059, MYT1, PPP1R126, protein kinase, membrane associated tyrosine/threonine 1, RGD1305434                                                                                                                                                                                                                         |
| PP2A      | protein PHOSPHATASE 2A, Protein Phosphatase Type2a                                                                                                                                                                                                                                                                                 |
| PRC1      | ASE1, D7Etd348, D7Etd348e, protein REGULATING CYTOKINESIS 1, protein regulator of cytokinesis 1                                                                                                                                                                                                                                    |
| PTTG1     | AW555095, C87862, EAP1, HPTTG, pituitary tumor-transforming gene 1, PITUITARY TUMOR TRANSFORMING GENE protein1, Pituitary tumour transforming 1, pituitary tumour-transforming gene 1, PITUITARY tumour TRANSFORMING GENE protein1, PTT, PTTG, PTTG1 regulator of sister chromatid separation, securin, Pttg3, sec, Securin, TUTR1 |
| RAD21     | CDLS4, hHR21, HR21, HRAD21, MCD1, MGS, mHR21, mKIAA0078, NXP1, Pw29, RAD21 cohesin complex component, SCC, SCC1                                                                                                                                                                                                                    |
| SLK       | 9A, 9A2, AV021402, AW411554, bA16H23.1, Etk4, KIAA0204, LOSK, mKIAA0204, mS, mSLK, S, se20-9, SK2, SMAK, STE20-like kinase, Stk, STK2                                                                                                                                                                                              |
| SMC1A     | 5830426I24Rik, CDLS2, DEE85, DXS423E, EIEE85, mKIAA0178, SB1., SB1.8, SMC1, SMC1alpha, SMC1 beta, SMC1L1, Smc1 $\alpha$ , SMC1 $\beta$ , SMCB, STRUCTURAL MAINTENANCE of CHROMOSOMES 1, structural maintenance of chromosomes 1A                                                                                                   |
| SMC3      | BAM, Bamacan, BMH, CDLS3, Csp, CSPG6, HCAP, Mmi, MMIP1, Smc, SMC3L1, SmcD, structural maintenance of chromosomes 3                                                                                                                                                                                                                 |
| STAG2     | 9230105L23Rik, B230112I07Rik, bA517O1.1, HPE13, MKMS, NEDXCF, RGD1562042, S, SA, SA-2, SAP2, SCC3B, Stromal antigen 2                                                                                                                                                                                                              |
| TGFB1     | Beta Ig-h3, CED, DPD1, IBDIMDE, LAP, TGF-beta1, TGF-beta, TGF- $\beta$ 1, TGF- $\beta$ , tgf- $\beta$ (1), TGFB, transforming growth factor beta 1, transforming growth factor, beta 1, transforming growth factor, $\beta$ 1, transforming growth factor- $\beta$ 1, Transforming growth factor- $\beta$ (1), $\beta$ Ig-h3       |
| WEE1      | WEE1A, Wee1b, WEE1 G2 checkpoint kinase, WEE 1 homolog 1 (S. pombe), WEE1hu, WEE1-LIKE protein KINASE                                                                                                                                                                                                                              |

# Pathway Analysis Using IPA Software; canonical pathway

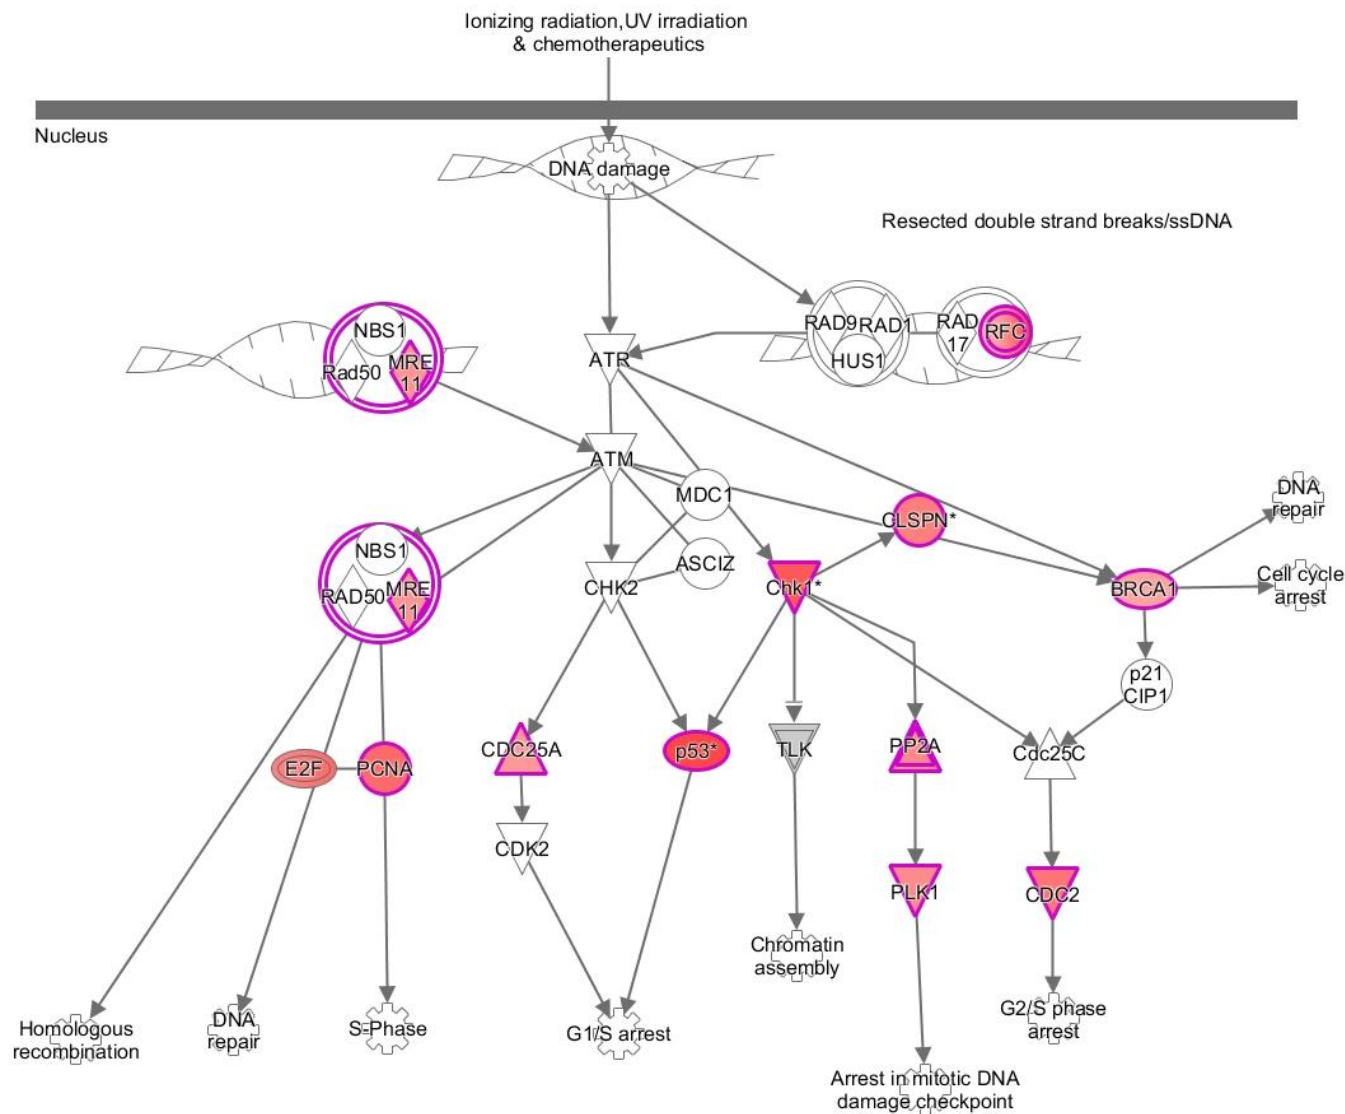

Figure S24. Role of CHK Proteins in Cell Cycle Checkpoint Control at 24 h

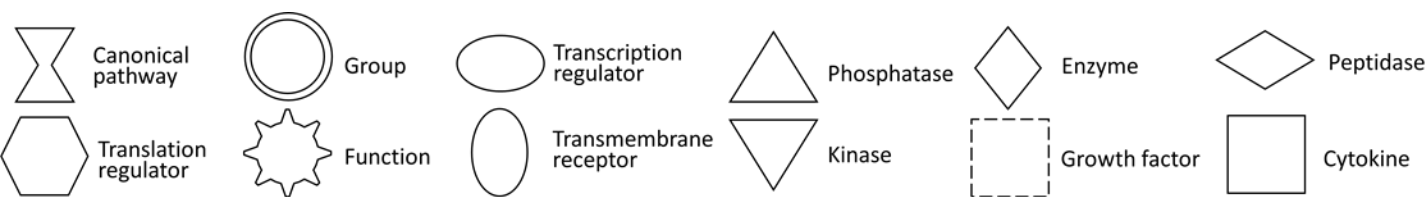

Red: Increased, FDR<0.05 versus solvent control

Green: Decreased, FDR<0.05 versus solvent control

| Symbol | Synonym(s)                                                                                                                                                                                                                                                                  |
|--------|-----------------------------------------------------------------------------------------------------------------------------------------------------------------------------------------------------------------------------------------------------------------------------|
| ATM    | A1256621, AT1, ATA, ataxia telangiectasia mutated, ATC, ATD, ATDC, ATE, ATM serine/threonine kinase, C030026E19RIK, TEL1, TELO1                                                                                                                                             |
| ATMIN  | As, ASCIZ, ATM interactor, gpg, gpg6, KIAA0431, mKIAA0431, RGD1305781, ZNF822                                                                                                                                                                                               |
| ATR    | ataxia telangiectasia and Rad3 related, Ataxia-telangiectasia-like, ATR serine/threonine kinase, FCTCS, FRP1, LOC100365674, LOC367198, LOC684113, MEC1, SCKL, SCKL1                                                                                                         |
| BRCA1  | BRCA1 DNA repair associated, BRCA1, DNA repair associated, BRCAI, BRCC1, breast cancer 1, early onset, BROVCA1, FANCS, PNCA4, PPP1R53, PSCP, RNF53                                                                                                                          |
| CDC25A | CDC25A2, cell division cycle 25A, D9Erttd393, D9Erttd393e                                                                                                                                                                                                                   |
| CDC25C | CDC25, cdc25c-64, cell division cycle 25C, PPP1R60                                                                                                                                                                                                                          |
| CDK1   | CDC2, CDC28A, Cdc2a, CDC2 kinase, cyclin-dependent kinase 1, GROWTH-ASSOCIATED HISTONE H1 KINASE, p34, P34CDC2                                                                                                                                                              |
| CDK2   | A630093N05Rik, CDC2-RELATED KINASE, CDKN2, Cyclin A associated kinase, cyclin-dependent kinase 2, CYCLIN E ASSOCIATED KINASE, p33(CDK2)                                                                                                                                     |
| CDKN1A | CAP, CAP20, CDK, CDK1, Cdkn, CDKN1, CDKNA1, Cl, CIP1, cyclin-dependent kinase inhibitor 1A, cyclin-dependent kinase inhibitor 1A (P21), mda, MDA-6, P2, P21, p21C, p21Cip, p21CIP1, p21W, p21WAF, p21Waf1, Pz1 Cyclin-Dependent Kinase Inhibitor, SD, SDI1, UV96, Waf, WAF1 |
| CHEK1  | C85740, checkpoint kinase 1, CHK1, rad27                                                                                                                                                                                                                                    |
| CHEK2  | CDS1, Check2, checkpoint kinase 2, CHK2, hCds1, HUCDS1, LFS2, PP1425, Rad, RAD53                                                                                                                                                                                            |
| CLSPN  | B130025E01, C85083, claspin, E130314M08RIK                                                                                                                                                                                                                                  |
| HUS1   | hHUS1, HUS1 checkpoint clamp component                                                                                                                                                                                                                                      |
| MDC1   | 6820401C03, AA413496, mediator of DNA damage checkpoint 1, mKIAA0170, NFB, NFB1                                                                                                                                                                                             |
| MRE11  | ATLD, HNGS1, MRE11A, MRE11A homolog A, double strand break repair nuclease, MRE11B, MRE11 homolog, double strand break repair nuclease                                                                                                                                      |
| MRN    | MRE11-Rad50-NBS1, NBS1-Rad50-MRE11                                                                                                                                                                                                                                          |
| NBN    | ATV, AT-V1, AT-V2, Nb, NBS, NBS1, NIBRIN, P95                                                                                                                                                                                                                               |
| PCNA   | ATLD2, Pcn/cyclin, PCNAR, proliferating cell nuclear antigen                                                                                                                                                                                                                |
| PLK1   | P, PLK, polo-like kinase 1, STPK, STPK13                                                                                                                                                                                                                                    |
| PP2A   | protein PHOSPHATASE 2A, Protein Phosphatase Type2a                                                                                                                                                                                                                          |
| RAD17  | CCYC, HRAD17, MmRad, MmRad24, R24L, RAD17 checkpoint clamp loader component, RAD17SP, RAD24                                                                                                                                                                                 |
| RAD50  | hRad50, Mr, Mrell, NBSLD, Rad, RAD502, RAD50 double strand break repair protein, Rad50l                                                                                                                                                                                     |
| RAD9A  | Ra, RAD9, RAD9 checkpoint clamp component A                                                                                                                                                                                                                                 |
| TLK1/2 | TLK                                                                                                                                                                                                                                                                         |
| TP53   | bbl, BCC7, bfy, bhy, BMFS5, LFS1, p4, p44, p5, P53, P53 cellular tumour antigen, p53 tumor suppressor, transformation related protein 53, TRP53, tumor protein p53, tumour protein p53                                                                                      |

# Pathway Analysis Using IPA Software; canonical pathway

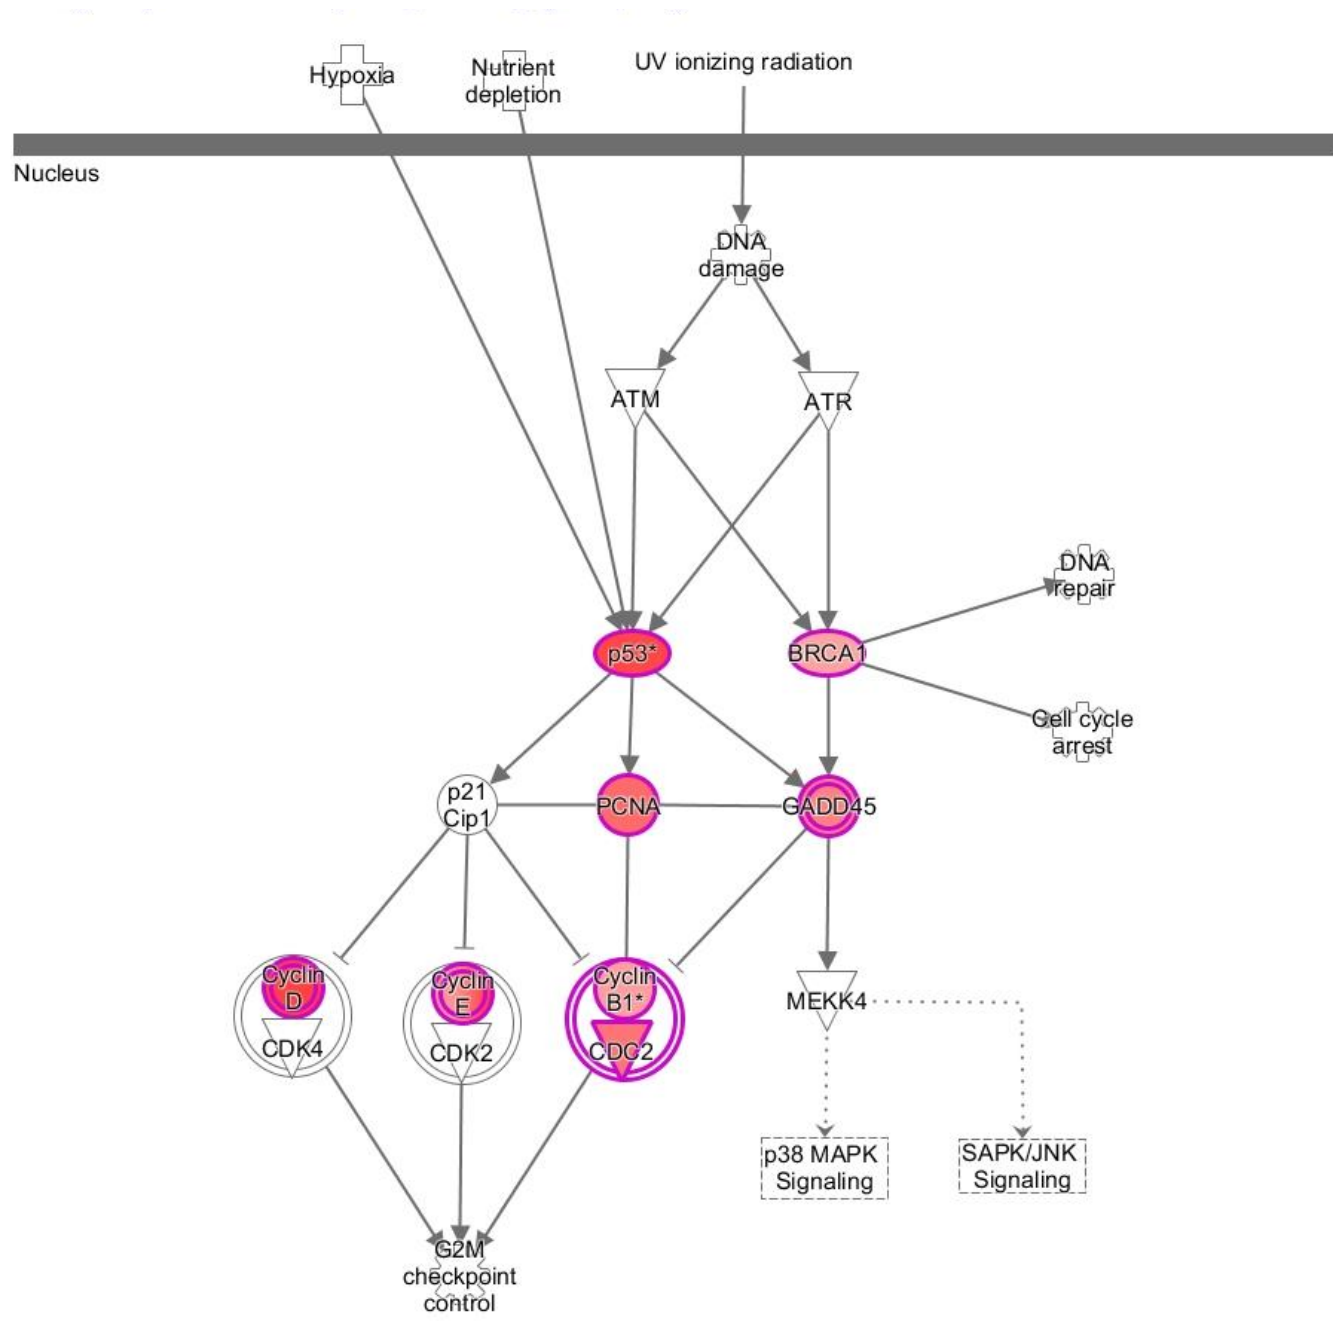

Figure S25. GADD45 Signaling at 24 h

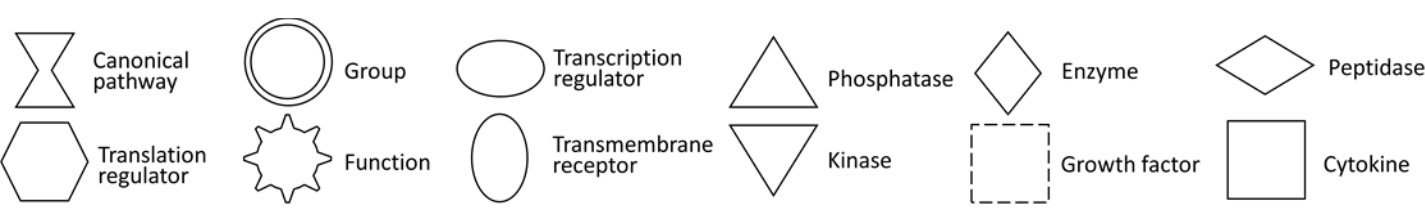

Red: Increased, FDR<0.05 versus solvent control      Green: Decreased, FDR<0.05 versus solvent control

| Symbol        | Synonym(s)                                                                                                                                                                                                                                                                                                                                                                                                                                                                                                                 |
|---------------|----------------------------------------------------------------------------------------------------------------------------------------------------------------------------------------------------------------------------------------------------------------------------------------------------------------------------------------------------------------------------------------------------------------------------------------------------------------------------------------------------------------------------|
| ATM           | A1256621, AT1, ATA, ataxia telangiectasia mutated, ATC, ATD, ATDC, ATE, ATM serine/threonine kinase, C030026E19RIK, TEL1, TELO1                                                                                                                                                                                                                                                                                                                                                                                            |
| ATR           | ataxia telangiectasia and Rad3 related, Ataxia-telangiectasia-like, ATR serine/threonine kinase, FCTCS, FRP1, LOC100365674, LOC367198, LOC684113, MEC1, SCKL, SCKL1                                                                                                                                                                                                                                                                                                                                                        |
| BRCA1         | BRCA1 DNA repair associated, BRCA1, DNA repair associated, BRCAI, BRCC1, breast cancer 1, early onset, BROVCA1, FANCS, PNCA4, PPP1R53, PSCP, RNF53                                                                                                                                                                                                                                                                                                                                                                         |
| CCNB1         | CCNB, Ccnb1-ps, Ccnb1-r, CCNB1-RS1, Ccnb1-rs13, CycB1, Cycb1-rs1, Cycb-4, Cycb-5, CYCLIN B, CYCLIN B1, cyclin B1, pseudogene, Cyclin b4, EG434175, Gm5593                                                                                                                                                                                                                                                                                                                                                                  |
| CDK1          | CDC2, CDC28A, Cdc2a, CDC2 kinase, cyclin-dependent kinase 1, GROWTH-ASSOCIATED HISTONE H1 KINASE, p34, P34CDC2                                                                                                                                                                                                                                                                                                                                                                                                             |
| CDK2          | A630093N05Rik, CDC2-RELATED KINASE, CDKN2, Cyclin A associated kinase, cyclin-dependent kinase 2, CYCLIN E ASSOCIATED KINASE, p33(CDK2)                                                                                                                                                                                                                                                                                                                                                                                    |
| CDK2-CyclinE  | Cyclin E-CDK2                                                                                                                                                                                                                                                                                                                                                                                                                                                                                                              |
| CDK4          | CMM3, Crk, Crk3, cyclin-dependent kinase 4, LOC100362034, PSK-J3                                                                                                                                                                                                                                                                                                                                                                                                                                                           |
| CDKN1A        | CAP, CAP20, CDK, CDKI, Cdkn, CDKN1, CDKNA1, Cl, CIP1, cyclin-dependent kinase inhibitor 1A, cyclin-dependent kinase inhibitor 1A (P21), mda, MDA-6, P2, P21, p21C, p21Cip, p21CIP1, p21W, p21WAF, p21Waf1, Pzl Cyclin-Dependent Kinase Inhibitor, SD, SDI1, UV96, Waf, WAF1                                                                                                                                                                                                                                                |
| Cyclinb1/Cdc2 | Cyclin B1-Cdc2                                                                                                                                                                                                                                                                                                                                                                                                                                                                                                             |
| CyclinD       | CycD, Cyclin D1                                                                                                                                                                                                                                                                                                                                                                                                                                                                                                            |
| FOXO3         | I110048B16RIK, 2010203A17RIK, AF6q21, C76856, FKHR, Fkhr2, FKHL1, FKHL1P2, forkhead box O3, Fox, FOXO2, FOXO3A                                                                                                                                                                                                                                                                                                                                                                                                             |
| GADD45A       | AA545191, Ddit, DDIT1, Gadd, GADD45, GADD45 alpha, GADD45a, growth arrest and DNA-damage-inducible 45 alpha, growth arrest and DNA-damage-inducible 45 $\alpha$ , Growth arrest and DNA-damage-inducible 45, $\alpha$ , growth arrest and DNA damage inducible alpha, growth arrest and DNA-damage-inducible, alpha, growth arrest and DNA damage inducible $\alpha$ , growth arrest and DNA-damage-inducible, $\alpha$                                                                                                    |
| GADD45B       | I1323528, GADD45beta, Gadd45 $\beta$ , growth arrest and DNA-damage-inducible 45 beta, growth arrest and DNA-damage-inducible 45 $\beta$ , growth arrest and DNA damage inducible beta, growth arrest and DNA-damage-inducible, beta, growth arrest and DNA damage inducible $\beta$ , growth arrest and DNA-damage-inducible, $\beta$ , MYD118, Myeloid differentiation primary response                                                                                                                                  |
| GADD45G       | I1327420, C86281, CR, CR6, DDIT2, GADD45gamma, Gadd45- $\gamma$ , Growth Arrest And DNA Damage Inducible, growth arrest and DNA-damage-inducible 45 gamma, growth arrest and DNA-damage-inducible 45 $\gamma$ , growth arrest and DNA damage inducible gamma, growth arrest and DNA-damage-inducible, gamma, growth arrest and DNA damage inducible $\gamma$ , growth arrest and DNA-damage-inducible, $\gamma$ , GRP17, OIG, OIG37                                                                                        |
| Genistein     | 446-72-0, 4',5,7-trihydroxyisoflavone, 4H-1-benzopyran-4-one, 5,7-dihydroxy-3-(4-hydroxyphenyl)-, 5,7-dihydroxy-3-(4-hydroxyphenyl)chromen-4-one, BIO 300, C15H10O5, G103, genestein, gentistein, Prunetol, PTI-G4660, SIPI-9764-I, Sophoricol                                                                                                                                                                                                                                                                             |
| IL1B          | IL-, IL-1, IL1-BETA, IL-1F2, IL-1 $\beta$ , interleukin 1 beta, Interleukin 1 $\beta$ , OAF, Osteoclast-Activating Factor, Pro-IL-1beta, Pro-IL-1 $\beta$                                                                                                                                                                                                                                                                                                                                                                  |
| JNK           | JNK 54/46, Jnk p56, JNK/SAPK, JUN KINASE, p40, p47, Sapk/Jnk                                                                                                                                                                                                                                                                                                                                                                                                                                                               |
| MAP2K3        | AW212142, LOC100911550, MAP KINASE KINASE 3B, MAPKK3, MEK3, mitogen-activated protein kinase kinase 3, MKK3, Mkk3b, Prkm, PRKMK3, SAPKK-2                                                                                                                                                                                                                                                                                                                                                                                  |
| MAP2K4        | JNKK, JNKK1, MAPK/ERK KINASE-1, MAPKK4, MEK4, mitogen-activated protein kinase kinase 4, MKK4, PRKMK4, SAPKK-1, Sek, SEK1, Ser, SERK1, SKK1                                                                                                                                                                                                                                                                                                                                                                                |
| MAP2K6        | MAPKK6, Mapk kinase 6, MEK6, mitogen-activated protein kinase kinase 6, MKK6, MKK6BE, Prkm, PRKMK6, Rac, SAP, SAPKK-3                                                                                                                                                                                                                                                                                                                                                                                                      |
| MAP2K7        | 5930412N11Rik, JNKK, JNKK 2, MAPK2K7, MAPKK 7, Mapkk7 protein 2, MEK, MEK 7, mitogen-activated protein kinase kinase 7, MKK7, Mkk7 beta1, Prkm, PRKMK7, SAPKK-4, sek, sek2                                                                                                                                                                                                                                                                                                                                                 |
| MAP3K4        | D17Rp, D17Rp17, D17Rp17e, MAPK3K4, MAPKK, MAPKKK4, Mek4b, MEKK1, MEKK 4, mitogen-activated protein kinase kinase kinase 4, mKIAA0213, MTK1, PRO0412, RP, RP17, Rp17a, T, TAS                                                                                                                                                                                                                                                                                                                                               |
| MIR130B       | bta-mir-130a, cfa-mir-130a, HSA-MIR-130, hsa-mir-130a, hsa-mir-130b, hsa-mir-301, hsa-mir-301a, hsa-mir-301b, microRNA 130, microRNA 130a, microRNA 130b, microRNA 301, microRNA 301a, microRNA 301b, MIR130A, MIR130B, mir-30, MIR301, MIR301A, MIR301B, Mim, Mim1, Mim130, MIRN130A, MIRN130B, Mim3, MIRN301, MIRN301A, MIRN301B, miRNA130A, mmi-mir-130a, Mmu-mir-130, mmu-mir-130a, mmu-mir-130b, mmu-mir-3, mmu-mir-301, mmu-mir-301a, mmu-mir-301b, mo-mir-130a, mo-mir-130b, mo-mir-301a, mo-mir-301b, ssc-mir-130a |
| MIR383        | hsa-mir-383, microRNA 383, Mirn, MIRN383, mmu-mir-3, mmu-mir-383, mo-mir-383                                                                                                                                                                                                                                                                                                                                                                                                                                               |
| MMS           | 66-27-3, C2H6O3S, methanesulfonic acid methyl ester, methanesulfonic acid, methyl ester, methyl mesylate, methyl methanesulfonate, methyl methanesulphonate, MMS                                                                                                                                                                                                                                                                                                                                                           |
| MYC           | AU016757, bHLHe3, bHLHe39, CMYC, C-MYC-P64, mMyc, MRTL, Myc2, MYCC, MYC proto-oncogene, bHLH transcription factor, myelocytomatosis oncogene, N, Niard, Nird, RNCMYC                                                                                                                                                                                                                                                                                                                                                       |
| NFkB          | NF-KAPPA B, NF- $\kappa$ B, nuclear factor- $\kappa$ b, transcription factor nuclear factor $\kappa$ b                                                                                                                                                                                                                                                                                                                                                                                                                     |
| NFYA          | AA407810, CBF-A, CBF-B, FLJ11236, HAP2, LOC100129914, NFY, nuclear transcription factor-Y alpha, nuclear transcription factor Y subunit alpha, nuclear transcription factor Y subunit $\alpha$ , nuclear transcription factor-Y $\alpha$ , Nuclear transcription factor y, $\alpha$ , isoform 1, Nuclear transcription factor y, $\alpha$ , isoform 2, Sez1, SEZ-10                                                                                                                                                        |
| p38 MAPK      | P38, p38 MAP KINASE, P38 MITOGEN-ACTIVATED protein KINASE                                                                                                                                                                                                                                                                                                                                                                                                                                                                  |
| PCNA          | ATL2D, Pcna/cyclin, PCNAR, proliferating cell nuclear antigen                                                                                                                                                                                                                                                                                                                                                                                                                                                              |
| POU2F1        | 2810482H01Rik, LOC100503933, NF-A1, Oct-, OCT1, oct-1B, Otf-, OTF1, POU class 2 homeobox 1, POU domain, class 2, transcription factor 1                                                                                                                                                                                                                                                                                                                                                                                    |
| Smad2/3-Smad4 | Smad 2/3/4                                                                                                                                                                                                                                                                                                                                                                                                                                                                                                                 |
| SMAD4         | AW743858, D18Wsu70, D18Wsu70e, DPC, DPC4, JIP, Madh, MADH4, MYHRS, SMAD family member 4, Smaug1                                                                                                                                                                                                                                                                                                                                                                                                                            |
| Tgfbeta       | Tgfb, TGF-beta 1, 2, and 3, TGF $\beta$ , TGF- $\beta$ 1, 2, and 3, transforming growth factor- $\beta$                                                                                                                                                                                                                                                                                                                                                                                                                    |
| TNF           | AT-TNF, DI, DIF, RATTNF, TMTNF, Tn, TNF-a, TNF-alpha, Tnfs, Tnfsf1a, TNFSF2, TNF- $\alpha$ , TNLG1F, tumor necrosis factor, Tumor Necrosis Factor $\alpha$ , tumor necrosis factor, $\alpha$ , tumour necrosis factor, tumour Necrosis Factor Alpha, tumour necrosis factor, alpha, tumour Necrosis Factor $\alpha$ , tumour necrosis factor, $\alpha$                                                                                                                                                                     |
| TP53          | bbi, BCC7, bfy, bhy, BMFS5, LFS1, p4, p44, p5, P53, P53 cellular tumour antigen, p53 tumor suppressor, transformation related protein 53, TRP53, tumor protein p53, tumour protein p53                                                                                                                                                                                                                                                                                                                                     |
| TSA           | 2,4-heptadienamide, 7-[4-(dimethylamino)phenyl]-N-hydroxy-4,6-dimethyl-7-oxo-, (2E,4E,6R)-, 2,4-heptadienamide, 7-[4-(dimethylamino)phenyl]-N-hydroxy-4,6-dimethyl-7-oxo-, (2E,4E,6R)- (9CI), (2E,4E,6R)-7-[4-(dimethylamino)phenyl]-N-hydroxy-4,6-dimethyl-7-oxohepta-2,4-dienamide, 58880-19-6, C17H22N2O3, trichstatin A, TSA                                                                                                                                                                                           |
| WT1           | D630046I19RIK, GUD, NPHS4, WAGR, Wilms tumor 1 homolog, wilms' tumour, wilms tumour 1, Wilms tumour 1 homolog, Wilms tumour-suppressor, Wilms' tumour suppressor, WIT-2, WT, WT1 transcription factor, WT33                                                                                                                                                                                                                                                                                                                |
| ZNF350        | ZBRK1, ZFQR, zinc finger protein 350                                                                                                                                                                                                                                                                                                                                                                                                                                                                                       |

# Pathway Analysis Using IPA Software; canonical pathway

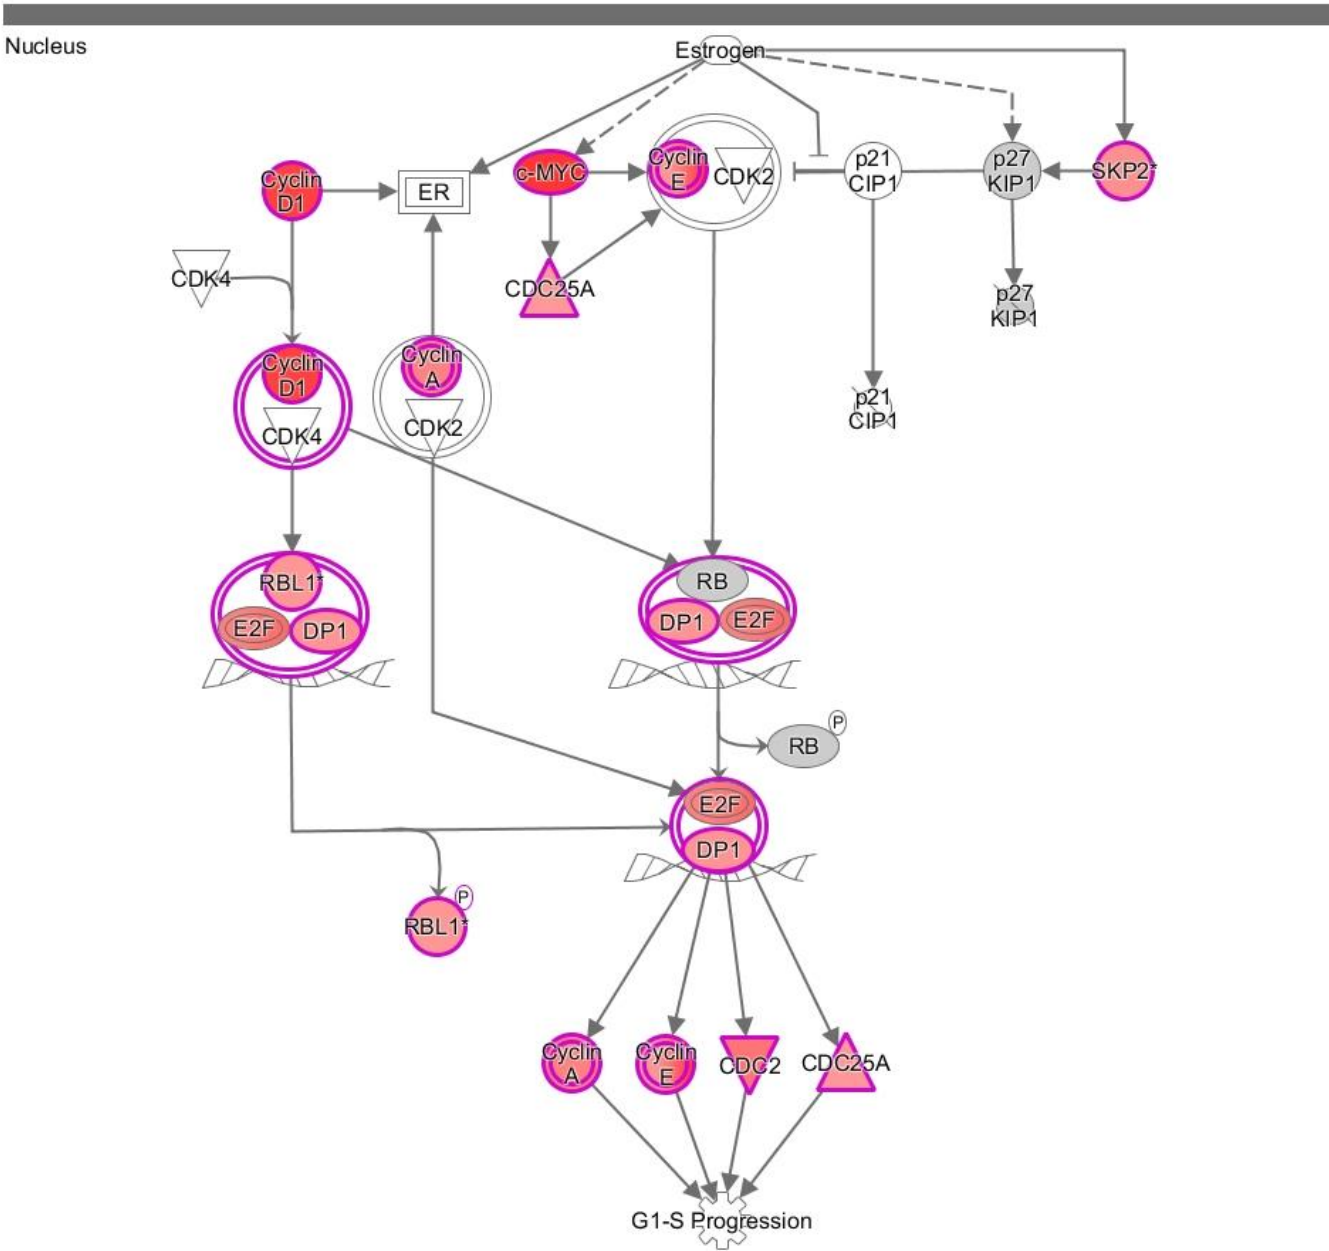

Figure S26. Estrogen-mediated S-phase Entry at 24 h

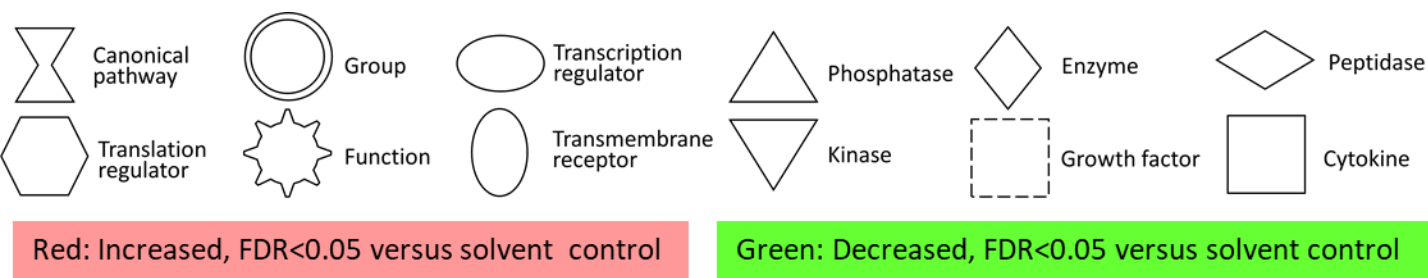



| Symbol           | Synonym(s)                                                                                                                                                                                                                                                                 |
|------------------|----------------------------------------------------------------------------------------------------------------------------------------------------------------------------------------------------------------------------------------------------------------------------|
| CCND1            | A1327039, B-CELL CLL/LYMPHOMA 1, bcl-, BCL1, cD1, CycD1, CYCLIN D1, Cyl-, Cyl-1, D11S287E, G1/S-Specific Cyclin D1, PR, PRAD1, U21B31                                                                                                                                      |
| CDC25A           | CDC25A2, cell division cycle 25A, D9Ert393, D9Ert393e                                                                                                                                                                                                                      |
| CDK1             | CDC2, CDC28A, Cdc2a, CDC2 kinase, cyclin-dependent kinase 1, GROWTH-ASSOCIATED HISTONE H1 KINASE, p34, P34CDC2                                                                                                                                                             |
| CDK2             | A630093N05Rik, CDC2-RELATED KINASE, CDKN2, Cyclin A associated kinase, cyclin-dependent kinase 2, CYCLIN E ASSOCIATED KINASE, p33(CDK2)                                                                                                                                    |
| CDK2-CyclinE     | Cyclin E-CDK2                                                                                                                                                                                                                                                              |
| CDK4             | CMM3, Crk, Crk3, cyclin-dependent kinase 4, LOC100362034, PSK-J3                                                                                                                                                                                                           |
| CDKN1A           | CAP, CAP20, CDK, CDK1, Cdkn, CDKN1, CDKNA1, Cl, CIP1, cyclin-dependent kinase inhibitor 1A, cyclin-dependent kinase inhibitor 1A (P21), mda, MDA-6, P2, P21, p21C, p21Cip, p21CIP1, p21W, p21WAF, p21Waf1, Pz1 Cyclin-Dependent Kinase Inhibitor, SD, SD1, UV96, Waf, WAF1 |
| CDKN1B           | AA408329, A1843786, Cdk1b, CDKN4, cyclin-dependent kinase inhibitor 1B, CYCLIN-DEPENDENT KINASE INHIBITOR P27, KIP1, MEN1B, MEN4, p2, p27, p27K, P27kip, P27KIP1, P28-ICK                                                                                                  |
| CyclinA/Cdk2     | CDK2-Cyclin A                                                                                                                                                                                                                                                              |
| CyclinD1/cdk4    | CDK4-Cyclin D1, Cyclin D1-CDK4                                                                                                                                                                                                                                             |
| E2f-T1dp1        | E2F-DP1                                                                                                                                                                                                                                                                    |
| Estrogen         | C18 steroids, oestrogen                                                                                                                                                                                                                                                    |
| Estrogenreceptor | ER, ESR, ESR1/2, esr1/esr2                                                                                                                                                                                                                                                 |
| MYC              | AU016757, bHLHe3, bHLHe39, CMYC, C-MYC-P64, mMyc, MRTL, Myc2, MYCC, MYC proto-oncogene, bHLH transcription factor, myelocytomatosis oncogene, N, Niard, Nird, RNCMYC                                                                                                       |
| Rb-E2F-DP1       | DP1-E2F-Rb                                                                                                                                                                                                                                                                 |
| RB1              | OSRC, p, p105, p105-Rb, p110 RB, p110-RB1, pp105, pp110, PPP1R130, pRb, R, RB, RB-ASSOCIATED, RB transcriptional corepressor 1, Retinoblastome tumor-suppression protein rb                                                                                                |
| RBL1             | AW547426, CP107, LOC683869, p10, p107, PRB1, RB transcriptional corepressor like 1                                                                                                                                                                                         |
| SKP2             | 4930500A04Rik, AC139209.1, cyclin A-associated kinase, FBL1, F-box protein Skp2, FBXL, FBXL1, FLB1, FWD1, p45, p45Skp2, RGD1562456, S-PHASE KINASE-ASSOCIATED protein 2                                                                                                    |
| TFDP1            | DILC, Dp, DP-1, Drtf, DRTF1, TB2/DP1, transcription factor Dp-1                                                                                                                                                                                                            |

# Pathway Analysis Using IPA Software; canonical pathway

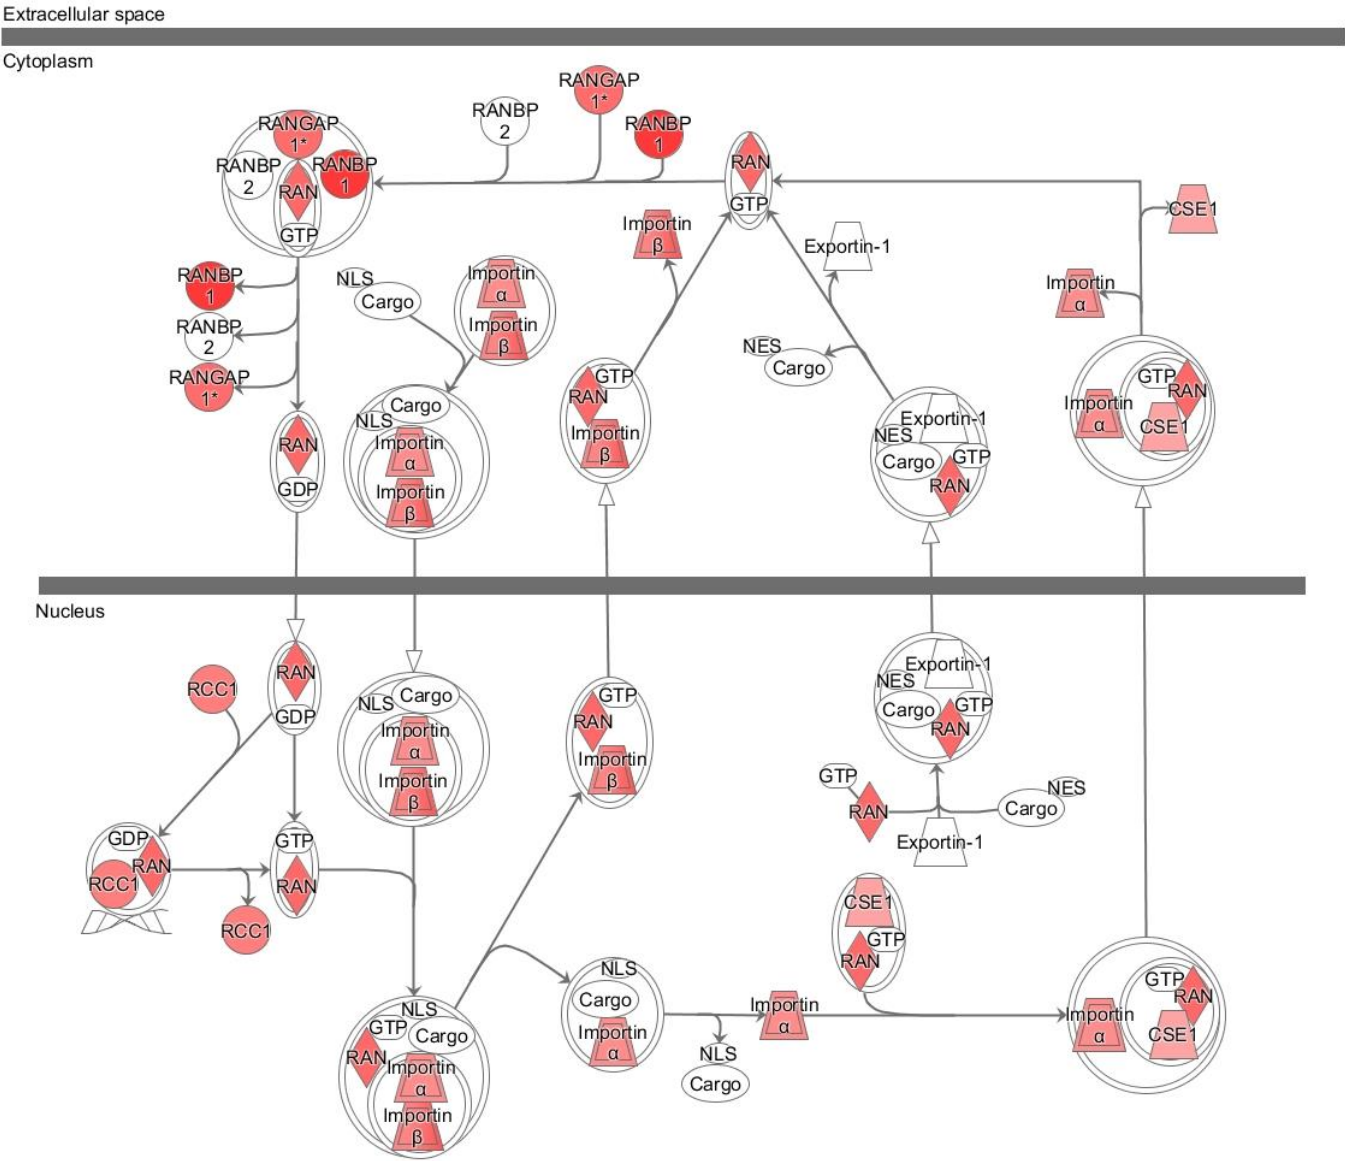

Figure S27. RAN Signaling at 24 h

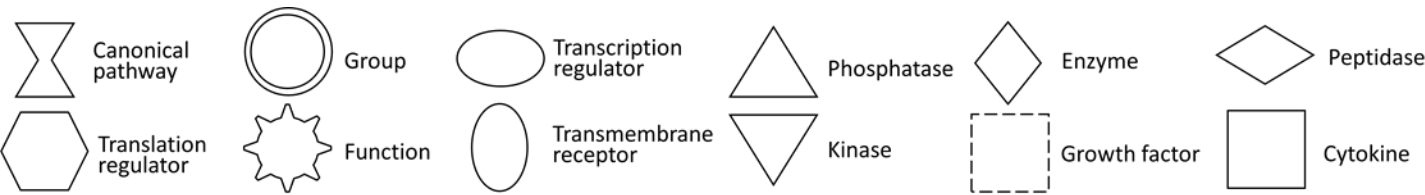

Red: Increased, FDR<0.05 versus solvent control

Green: Decreased, FDR<0.05 versus solvent control

| Symbol                    | Synonym(s)                                                                                                                                                                                                        |
|---------------------------|-------------------------------------------------------------------------------------------------------------------------------------------------------------------------------------------------------------------|
| CSE1L                     | 2610100P18Rik, AA407533, C, Ca, Caps, CAS, chromosome segregation 1 like, chromosome segregation 1-like ( <i>S. cerevisiae</i> ), CSE1, Exportin-2, Xp, XPO2                                                      |
| GDP                       | 146-91-8, [(2R,3S,4R,5R)-5-(2-amino-6-oxo-1H-purin-9-yl)-3,4-dihydroxyoxolan-2-yl]methyl phosphono hydrogen phosphate, C10H15N5O11P2, guanosine 5'-(trihydrogen diphosphate), guanosine diphosphate               |
| GTP                       | [[[(2R,3S,4R,5R)-5-(2-amino-6-oxo-1H-purin-9-yl)-3,4-dihydroxyoxolan-2-yl]methoxy-hydroxyphosphoryl] phosphono hydrogen phosphate, 86-01-1, C10H16N5O14P3, GTP, guanosine 5'-(tetrahydrogen triphosphate), Mg-GTP |
| Importinalpha             | IMP alpha, Importin $\alpha$ , IMP $\alpha$ , Kap alpha, Kap $\alpha$ , Karyopherin alpha, Karyopherin $\alpha$                                                                                                   |
| Importinalpha/beta        | Importin, Importin $\alpha/\beta$                                                                                                                                                                                 |
| Importinbeta              | Imp beta, Importin $\beta$ , Imp $\beta$ , Karyopherin beta, Karyopherin $\beta$                                                                                                                                  |
| Importina-Cargo           | Importinalpha-Cargo                                                                                                                                                                                               |
| Importina-RAN-GTP-CSE1    | Importinalpha-RAN-GTP-CSE1                                                                                                                                                                                        |
| Importin $\beta$ -RAN-GTP | Importinbeta-RAN-GTP                                                                                                                                                                                              |
| RAN                       | ARA24, Gsp1, GTPase Ran, RANGTPASE, RAN, member RAS oncogene family, Rasi2-9, RAS-like, family 2, locus 9, TC4                                                                                                    |
| RANBP1                    | Htf9, HTF9A, RAN binding protein 1, Ran-Specific GTPase-Activating                                                                                                                                                |
| RANBP2                    | A430087B05Rik, ADANE, A1256741, ANE1, IIAE3, NUP358, RAN binding protein 2, RGD1560047, TRP1, TRP2                                                                                                                |
| RANGAP1                   | C79654, Fug1, mKIAA1835, RANGAP, RAN GTPase activating protein 1, SD                                                                                                                                              |
| RCC1                      | 4931417M11Rik, A1326872, CHC1, RCC1-L, regulator of chromosome condensation 1, RENAL CELL CARCINOMA 1, SNHG3-RCC1                                                                                                 |
| XPO1                      | AA420417, Crm, CRM-1, CRMA, emb, Exp1, Exportin-1                                                                                                                                                                 |

## Pathway Analysis Using IPA Software; canonical pathway

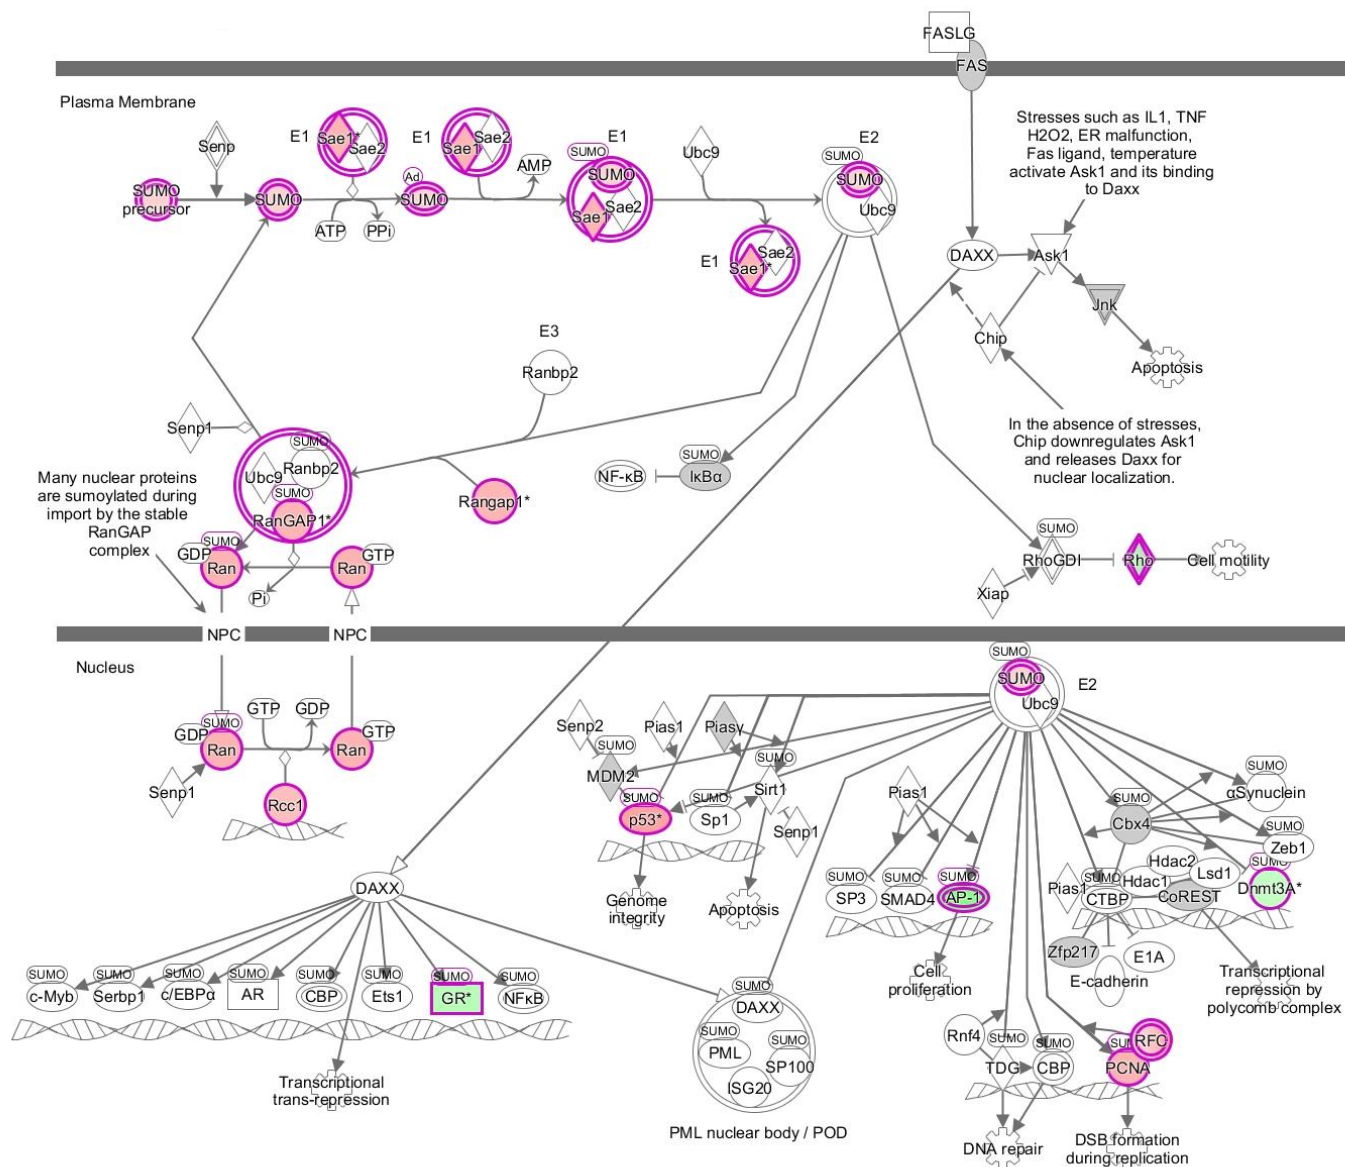

Figure S28. Sumoylation Pathway at 24 h



Red: Increased, FDR<0.05 versus solvent control

Green: Decreased, FDR<0.05 versus solvent control

| Symbol   | Synonym(s)                                                                                                                                                                                                                                                                                                                                                                                                                                              |
|----------|---------------------------------------------------------------------------------------------------------------------------------------------------------------------------------------------------------------------------------------------------------------------------------------------------------------------------------------------------------------------------------------------------------------------------------------------------------|
| AMP      | 149022-20-8, [(2R,3S,4R,5R)-5-(6-aminopurin-9-yl)-3,4-dihydroxyoxolan-2-yl]methyl dihydrogen phosphate, 5'-adenylic acid, 5' AMP, 5'-AMP, 61-19-8, adenosine-5-monophosphate, adenosine-5-phosphate, adenosine monophosphate, C10H14N5O7P                                                                                                                                                                                                               |
| Ap1      | activator protein-1, c-Jun                                                                                                                                                                                                                                                                                                                                                                                                                              |
| AR       | AIS, Andr, androgen receptor, AW320017, DHTR, HUMARA, HYSP1, KD, NR3C4, SBMA, SMAX1, Testosterone receptor, TFM                                                                                                                                                                                                                                                                                                                                         |
| ATP      | [[[(2R,3S,4R,5R)-5-(6-aminopurin-9-yl)-3,4-dihydroxyoxolan-2-yl]methoxy-hydroxyphosphoryl] phosphono hydrogen phosphate, 56-65-5, 9-beta-D-arabinofuranosyladenine 5'-triphosphate, 9-beta-D-arabinofuranosyladenine 5'-triphosphate, adenosine 5'-(tetrahydrogen triphosphate), adenosine 5'-triphosphate, ATP, ATP4-, C10H16N5O13P3                                                                                                                   |
| CBP/p300 | CBP, CBP-p300                                                                                                                                                                                                                                                                                                                                                                                                                                           |
| CBX4     | chromobox 4, Hpc2, MPc, MPc2, NBP16, PC, PC2                                                                                                                                                                                                                                                                                                                                                                                                            |
| CDH1     | AA960649, ARC-1, BCDS1, cadherin 1, Cadherin E, CD324, CDHE, CSEIL, E-ca, ECAD, E-cadh, E-cadherin, L-C, L-CAM, Um, UVO, uvomorulin                                                                                                                                                                                                                                                                                                                     |
| CEBPA    | CBF-A, CCAAT enhancer binding protein alpha, CCAAT/enhancer binding protein alpha, CCAAT/enhancer binding protein (C/EBP), alpha, CCAAT/enhancer binding protein (C/EBP), alpha, CCAAT enhancer binding protein alpha, CCAAT/enhancer binding protein alpha, Ceb, CEBP, C/ebp, Cebp1a, C/EBP-alpha, Cebp Alpha, C/EBP alpha P30, C/EBP alpha P42, CEBPa, C/EBP-alpha, C/EBP alpha P30, C/EBP alpha P42, C/ERB, DBPCEP, p42, Zinc Finger Homeobox 1b     |
| CTBP     | CTBP1/2                                                                                                                                                                                                                                                                                                                                                                                                                                                 |
| DAXX     | BING2, DAP6, death-domain associated protein, EAP1, Fas death domain-associated protein, PML ASSOCIATED FACTOR                                                                                                                                                                                                                                                                                                                                          |
| DNMT3A   | DNA Methyltransferase 3A, DNA methyltransferase 3 alpha, DNA methyltransferase 3 alpha, DNA MTase HsallIA, DNMT3A2, HESJAS, M.HsallIA, MmullIA, TBRS                                                                                                                                                                                                                                                                                                    |
| ETS1     | A196000, A1448617, c-ets-1, D230050P06, E26 avian leukaemia oncogene 1, 5' domain, E26 avian leukemia oncogene 1, 5' domain, Ets-, Etsonc, ETS proto-oncogene 1, transcription factor, EWSR2, p42Ets, p42 ETS1, p51Ets, p54, Tp, TPL1, v-Ets, vs                                                                                                                                                                                                        |
| FAS      | A196731, ALPS1A, AP, APO-1, APT1, CD95, CD95 receptor, CD95L, FAS1, Fas (TNF receptor superfamily member 6), Fas cell surface death receptor, FAS/APO1, FasR, FASTM, lpr, Receptor for Fas Ligand, Receptors for Fas Ligand, TNF, Tnf receptor member 6, TNFR6, Tnfr, TNFRSF6                                                                                                                                                                           |
| FASLG    | ALPS1B, APT1, APT1LG1, APTL, CD178, CD95, CD95-L, F, Fa, FASL, Fas Ligand, Fas ligand (TNF superfamily, member 6), gld, mFasL, Tnfl6, Tnfs, TNFSF6, TNLG1A                                                                                                                                                                                                                                                                                              |
| GDP      | 146-91-8, [(2R,3S,4R,5R)-5-(2-amino-6-oxo-1H-purin-9-yl)-3,4-dihydroxyoxolan-2-yl]methyl phosphono hydrogen phosphate, C10H15N5O11P2, guanosine 5'-(trihydrogen diphosphate), guanosine diphosphate                                                                                                                                                                                                                                                     |
| GTP      | [[[(2R,3S,4R,5R)-5-(2-amino-6-oxo-1H-purin-9-yl)-3,4-dihydroxyoxolan-2-yl]methoxy-hydroxyphosphoryl] phosphono hydrogen phosphate, 86-01-1, C10H16N5O14P3, GTP, guanosine 5'-(tetrahydrogen diphosphate), Mg-GTP                                                                                                                                                                                                                                        |
| HDAC1    | GON-10, HD1, HDAC, Hdac1-ps, histone deacetylase 1, KDAC1, LOC630524, MommeD, MommeD5, RP, RPD3, RPD3L1                                                                                                                                                                                                                                                                                                                                                 |
| HDAC2    | D10Wsu179, D10Wsu179e, HD2, histone deacetylase 2, KDAC2, mRPD3, RGD: 619976, RPD3, YAF1, Yy1b, Yy1bp                                                                                                                                                                                                                                                                                                                                                   |
| ISG20    | 160020310Rik, 2010107M23Rik, CD25, Dn, DnaQL, HEM45, HEM46, interferon stimulated exonuclease gene 20, Interferon Stimulated Gene 20kd, interferon-stimulated protein, JS320                                                                                                                                                                                                                                                                            |
| Jnk      | JNK 54/46, Jnk p56, JNK/SAPK, JUN KINASE, p40, p47, Sapk/Jnk                                                                                                                                                                                                                                                                                                                                                                                            |
| KDM1A    | 1810043O07Rik, AA408884, Ao, AOF2, BHC110, CPRF, D4Etd478e, KDM1, KIAA0601, LS, LSD1, lysine demethylase 1A, lysine (K)-specific demethylase 1A, mKIAA0601, RGD1562975                                                                                                                                                                                                                                                                                  |
| MAP3K5   | 7420452D20Rik, A, APOPTOSIS SIGNAL REGULATED KINASE 1, AS, ASK, ASK1, M3K5, MAPKKK5, MEKK5, mitogen-activated protein kinase kinase kinase 5, RGD1306565                                                                                                                                                                                                                                                                                                |
| MDM2     | 1700007J15Rik, AA415488, ACTFS, hdm2, HDMX, LSKB, MDM2-A1, MDM2 proto-oncogene, MGC5370, Transformed 3t3 cell double minute 2, transformed mouse 3T3 cell double minute 2                                                                                                                                                                                                                                                                               |
| MYB      | A1550390, Cmyb, c-myb CDS, efg, M16449, MYB proto-oncogene, transcription factor, myeloblastosis oncogene                                                                                                                                                                                                                                                                                                                                               |
| NFKB     | NF Kappa B, NF-kappaB p50/p52, NF-kB, NF-kB p50/p52                                                                                                                                                                                                                                                                                                                                                                                                     |
| NFKBIA   | A1462015, EDAID2, I kappa B alpha, IkappaB alpha, IKBA, Ikb Kinase Alpha, Ikb Kinase alpha, IKBM, Ikb alpha, I kappa B alpha, I(kappa)B(alpha), MAD-3, Nfk, NF KAPPA beta alpha, NFKBI, NFKB inhibitor alpha, NFKB inhibitor alpha, NF kappa B alpha, nuclear factor of kappa light polypeptide gene enhancer in B cells inhibitor, alpha, nuclear factor of kappa light polypeptide gene enhancer in B cells inhibitor, alpha, pIkappaB alpha, RL/IF-1 |
| NR3C1    | G, GCCR, GCR, GCR alpha, GCRST, GCR alpha, Glucocorticoid receptor, Glucocorticoid receptor alpha-2, GR, GR-A, Gr alpha, Gr beta, GRL, Grl-1, Gr alpha, Gr beta, nuclear receptor subfamily 3 group C member 1, nuclear receptor subfamily 3, group C, member 1, Type ii corticosteroid receptor                                                                                                                                                        |
| PCNA     | ATLD2, Pcnac/cyclin, PCNAR, proliferating cell nuclear antigen                                                                                                                                                                                                                                                                                                                                                                                          |
| Pi       | 14265-44-2, inorganic phosphate, O4P-3, P, phosphate, phosphate(3-), phosphate ion, Pi                                                                                                                                                                                                                                                                                                                                                                  |
| PIAS1    | 2900068C24Rik, Ddxbp, DDXBP1, GB, GBP, GU/RH-II, protein inhibitor of activated STAT 1, protein inhibitor of activated STAT, 1, ZMIZ3                                                                                                                                                                                                                                                                                                                   |
| PIAS4    | P, PIasg, PIAS-gamma, PIASy, PIAS-y, protein inhibitor of activated STAT 4, protein inhibitor of activated STAT, 4, ZMIZ6                                                                                                                                                                                                                                                                                                                               |
| PML      | 1200009E24Rik, A1661194, PML nuclear body scaffold, PP8675, promyelocytic leukaemia, promyelocytic leukemia, RGD1562602, RNF71, Trim, TRIM19                                                                                                                                                                                                                                                                                                            |
| PPI      | 14000-31-8, 2466-09-3, diphosphate, diphosphate(4-), inorganic pyrophosphate, O7P2-4, phosfonato phosphate, PPI, pyrophosphate ion                                                                                                                                                                                                                                                                                                                      |
| RAN      | ARA24, Gsp1, GTPase Ran, RANGTPASE, RAN, member RAS oncogene family, Ras12-9, RAS-like, family 2, locus 9, TC4                                                                                                                                                                                                                                                                                                                                          |
| RANBP2   | A430087B05Rik, ADANE, A1256741, ANE1, IIAE3, NUP358, RAN binding protein 2, RGD1560047, TRP1, TRP2                                                                                                                                                                                                                                                                                                                                                      |
| RANGAP1  | C79654, Fug1, mKIAA1835, RANGAP, RAN GTPase activating protein 1, SD                                                                                                                                                                                                                                                                                                                                                                                    |
| RCC1     | 4931417M11Rik, A1326872, CHC1, RCC1-L, regulator of chromosome condensation 1, RENAL CELL CARCINOMA 1, SNHG3-RCC1                                                                                                                                                                                                                                                                                                                                       |
| RCOR1    | 5730409O11, 6720480E22Rik, AU042633, COREST, D12Wsu95, D12WSU95E, mKIAA0071, RCOR, REST corepressor 1, RGD1305743, Ro, Rocr1                                                                                                                                                                                                                                                                                                                            |
| Rho      | GTPase Rho, Rho, Rho Family, RHO-GTPASE, Rho-like Gtpase                                                                                                                                                                                                                                                                                                                                                                                                |
| Rho-GDI  | Rabgdi, RHO GUANINE NUCLEOTIDE DISSOCIATION INHIBITOR                                                                                                                                                                                                                                                                                                                                                                                                   |
| RNF4     | AU018689, Gtrge, GTRGEO8, RES4-26, ring finger protein 4, SLX5, SNURF                                                                                                                                                                                                                                                                                                                                                                                   |
| SAE1     | 2400010M20Rik, 2610044L12Rik, A, AL033372, AOS1, AW743391, D7Etd177, D7Etd177e, HSPC1, HSPC140, SUA1, SUMO1 activating enzyme subunit 1, Uble, UBLE1A                                                                                                                                                                                                                                                                                                   |
| SENP     | SUMO-specific protease                                                                                                                                                                                                                                                                                                                                                                                                                                  |
| SENP1    | 2310046A20Rik, D15Etd528, D15Etd528e, E330036L07RIK, SUMO1/sentrin specific peptidase 1, SUMO specific peptidase 1, SuPr-2                                                                                                                                                                                                                                                                                                                              |
| SENP2    | 2310007L05RIK, 4930538C18Rik, A1646780, AW554757, AXAM, AXAM2, LOC78973, mKIAA1331, SMT3IP2, SUMO/sentrin specific peptidase 2, SUMO specific peptidase 2, SuPr-1                                                                                                                                                                                                                                                                                       |
| SERBP1   | 1200009K13RIK, 9330147J08Rik, AL022786, CGI-55, CHD3IP, HABP4L, PAI1 binding, PAI1 MRNA binding, PAI-RBP1, SERPINE1 mRNA binding protein 1                                                                                                                                                                                                                                                                                                              |
| SIRT1    | AA673258, S, Si, SIRT, Sir2a, SIRT2alpha, SIRT2L1, SIRT2 alpha, SIRT, sirtuin 1                                                                                                                                                                                                                                                                                                                                                                         |
| SMAD4    | AW743858, D18Wsu70, D18Wsu70e, DPC, DPC4, JIP, Madh, MADH4, MYHRS, SMAD family member 4, Smaug1                                                                                                                                                                                                                                                                                                                                                         |
| SNCA     | AD AMYLOID, al, alp, alphaSYN, alpha SYNUCLEIN, ASYN, NACP, PARK1, PARK4, PD1, synuclein alpha, synuclein, alpha, Synuclein-alpha, synuclein, alpha, alpha-Syn, alpha SYNUCLEIN                                                                                                                                                                                                                                                                         |
| SP1      | 1110003E12RIK, AA450830, A1845540, Sp1-1, Sp1 transcription factor, Sp1 (trans spliced isoform), Trans-acting transcription factor 1                                                                                                                                                                                                                                                                                                                    |
| SP100    | A430075G10Rik, lysp100b, SP100 nuclear antigen, Speckled 100 kDa                                                                                                                                                                                                                                                                                                                                                                                        |
| SP3      | D130027J01RIK, Sp3 transcription factor, SPR2, trans-acting transcription factor 3                                                                                                                                                                                                                                                                                                                                                                      |
| STUB1    | 0610033N24Rik, 2210017D18Rik, 2310040B03RIK, AW046544, CH, CHIP, E3 U box, HSPABP2, NY-CO-7, SCA48, SCAR16, SDCCAG7, STIP1 homology and U-Box containing protein 1, UBOX1                                                                                                                                                                                                                                                                               |
| TDG      | E130317C12Rik, EG545124, Gm5806, hTDG, Jza, Jza1, JZA-3, Tdg-ps, Thymine-DNA glycosylase, thymine DNA glycosylase, pseudogene                                                                                                                                                                                                                                                                                                                           |
| TP53     | bbi, BCC7, bfy, bhy, BMF55, LFS1, p4, p44, p5, P53, P53 cellular tumour antigen, p53 tumor suppressor, transformation related protein 53, TRP53, tumor protein p53, tumour protein p53                                                                                                                                                                                                                                                                  |
| UBA2     | A, AA986091, ARX, HRIHFB2115, LOC100505842, SA, SAE2, UBA, UBA1, ubiquitin-like modifier activating enzyme 2, Ubl1a2, Uble1, UBLE1B                                                                                                                                                                                                                                                                                                                     |
| UBE2I    | 5830467E05Rik, C358B7.1, F830028O17RIK, P18, SUMO E2, Ubc9, UbcE2A, UbcE2i, Ubc9e, ubiquitin-conjugating enzyme E2I                                                                                                                                                                                                                                                                                                                                     |
| XAP      | 1110015C02RIK, A, Aipa, API3, APOPTOSIS INHIBITOR3, Bir, BIRC4, hiAP3, I, IAP-3, IL, ILP-1, MIHA, riap3, Xiap-4, X-linked inhibitor of apoptosis, XLP2                                                                                                                                                                                                                                                                                                  |
| ZEB1     | 3110032K11RIK, ARE, AREB6, BZP, [delta]E, DELTAEF1, FECD6, LOC100996668, MEB1, N, Nil2, NIL2A, PPCD3, Tcf18, TCF-8, TCP8, TF8, TRANSCRIPTION FACTOR 8, Tw, ZEB, Zhe, ZHEP, Zhep2, Zhx1, ZFHx1A, Zfx1, Zfx1a, Zfx1ha, zinc finger E-box binding homeobox 1, [delta]E, [delta]EF1                                                                                                                                                                         |
| Zfp217   | 4933431C08Rik, AW987152, Gm562, ZABC1, Zfp217, ZINC FINGER protein 217                                                                                                                                                                                                                                                                                                                                                                                  |

# Pathway Analysis Using IPA Software; canonical pathway

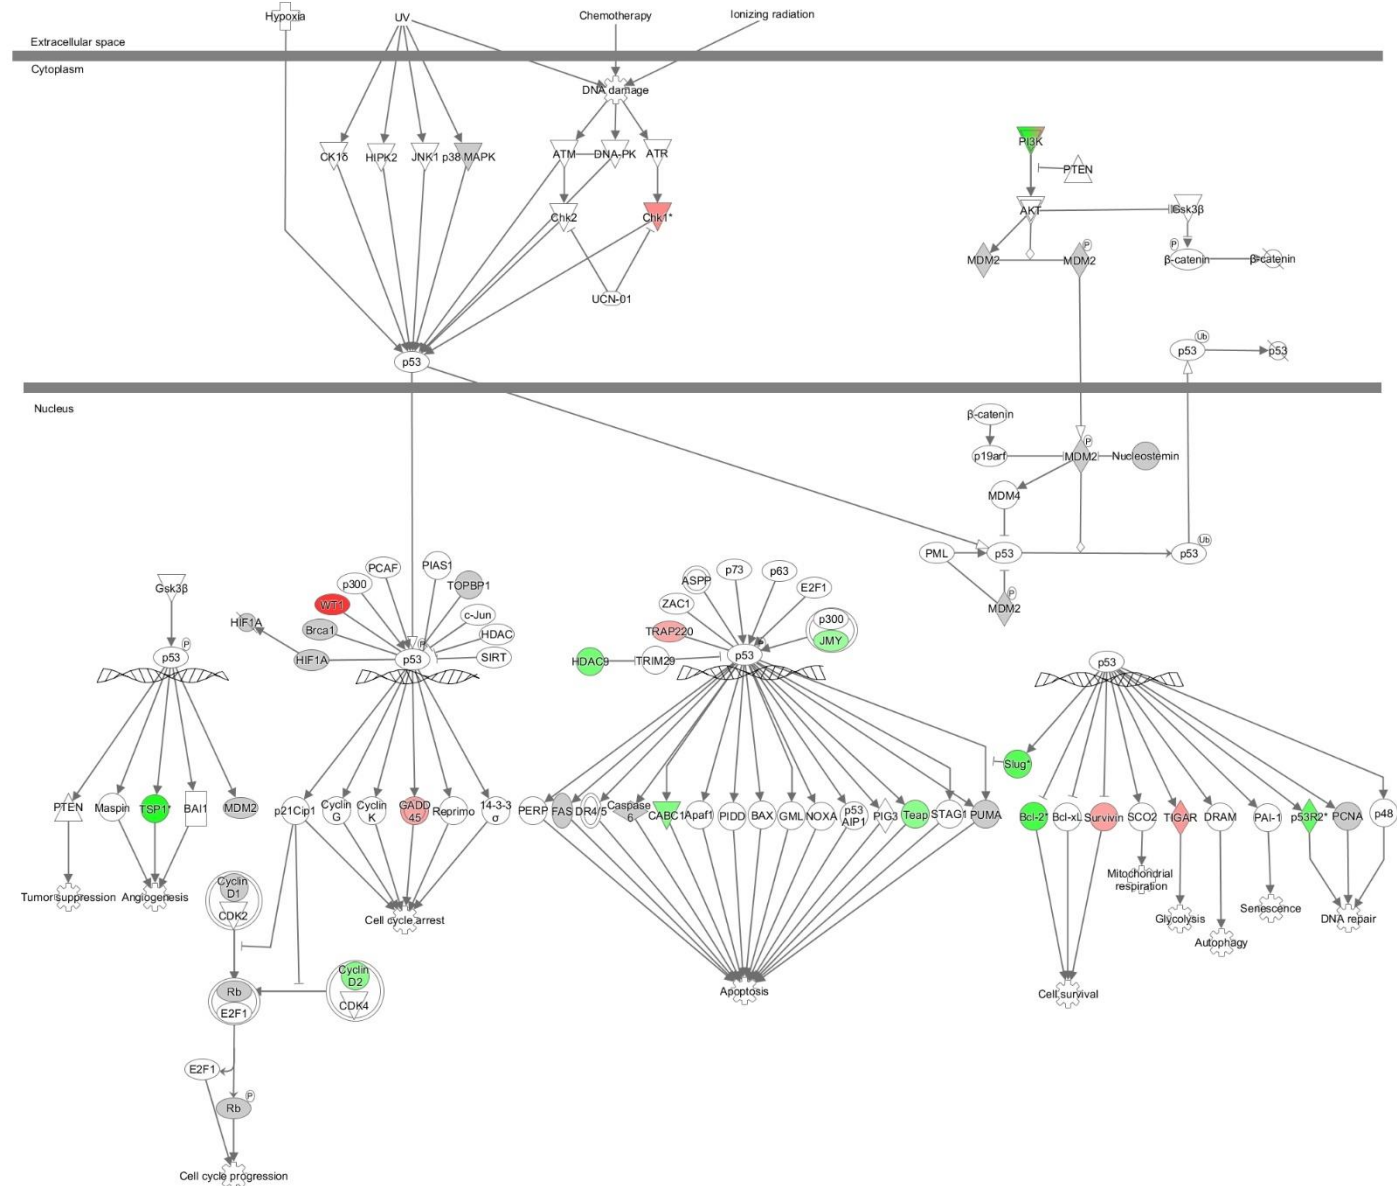

Figure S29. p53 Signaling at 8 days

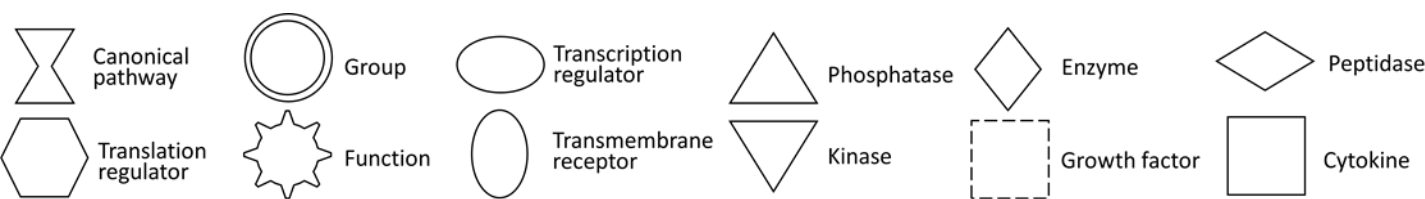

Red: Increased, FDR<0.05 versus solvent control      Green: Decreased, FDR<0.05 versus solvent control

| Symbol   | Synonym(s)                                                                                                                                                                                                                                                                                                                                                                                                                                                                                                                        |
|----------|-----------------------------------------------------------------------------------------------------------------------------------------------------------------------------------------------------------------------------------------------------------------------------------------------------------------------------------------------------------------------------------------------------------------------------------------------------------------------------------------------------------------------------------|
| ADGRB1   | adhesion G protein-coupled receptor B1, B830018M07Rik, Ba, BAI1, Brain-specific angiogenesis inhibitor 1, GDAIF, mKIAA04089, R75078                                                                                                                                                                                                                                                                                                                                                                                               |
| AKT      | AKT1/2/3, B/Akt, PKB, RAC-PK                                                                                                                                                                                                                                                                                                                                                                                                                                                                                                      |
| APAF1    | 6230400I06RIK, Ap, Apaf1, apoptotic peptidase activating factor 1, CED4, fog, mKIAA0413                                                                                                                                                                                                                                                                                                                                                                                                                                           |
| ATM      | A1256621, AT1, ATA, ataxia telangiectasia mutated, ATC, ATD, ATDC, ATE, ATM serine/threonine kinase, C030026E19RIK, TEL1, TELO1                                                                                                                                                                                                                                                                                                                                                                                                   |
| ATR      | ataxia telangiectasia and Rad3 related, Ataxia-telangiectasia-like, ATR serine/threonine kinase, FCTCS, FRP1, LOC100365674, LOC367198, LOC684113, MEC1, SCKL, SCKL1                                                                                                                                                                                                                                                                                                                                                               |
| BAX      | Bcl2-associated X BCL2 associated X apoptosis regulator, BCL2-associated X protein, BCL2L4                                                                                                                                                                                                                                                                                                                                                                                                                                        |
| BBC3     | BCL2 binding component 3, JFY-1, PU, PUMA, PUMA/JFY1                                                                                                                                                                                                                                                                                                                                                                                                                                                                              |
| BCL2     | AW986256, B cell leukaemia/lymphoma 2, B cell leukemia/lymphoma 2, Bcl-, Bcl2 alpha, BCL2 apoptosis regulator, BCL2, apoptosis regulator, Bcl2 $\alpha$ , C430015F12Rik, D630044D05RIK, D830018M01RIK, LOC100046608, ORF16, PPP1R50                                                                                                                                                                                                                                                                                               |
| BCL2L1   | bBclxl, Bcl, BCL2L, BCL2-like 1, BCLX, Bcl-X beta, Bclx gamma, BCL-XL/S, Bcl-X $\beta$ , Bclx $\gamma$ , PPP1R52                                                                                                                                                                                                                                                                                                                                                                                                                  |
| BIRC5    | A, AAC-11, AP14, API4, baculoviral IAP repeat-containing 5, EPR-1, s, Survivin, SURVIVIN 2B, T, TIAP                                                                                                                                                                                                                                                                                                                                                                                                                              |
| BRCA1    | BRCA1 DNA repair associated, BRCA1, DNA repair associated, BRCAI, BRCC1, breast cancer 1, early onset, BROVCA1, FANCS, PNCA4, PPP1R53, PSCP, RNF53                                                                                                                                                                                                                                                                                                                                                                                |
| CASP6    | caspase 6, LOC103689977, mCAS, MCH2                                                                                                                                                                                                                                                                                                                                                                                                                                                                                               |
| CND1     | A1327039, B-CELL CLL/LYMPHOMA 1, bcl-, BCL1, cd1, CycD1, CYCLIN D1, Cyl-, Cyl-1, D11S287E, G1/S-Specific Cyclin D1, PR, PRAD1, U21B31                                                                                                                                                                                                                                                                                                                                                                                             |
| CND2     | 2600016F06RIK, A1256817, BF642806, C86853, cd2, cyclin D2, CYL2, KIAK0002, MPPH3, V, Vi, Vin-1                                                                                                                                                                                                                                                                                                                                                                                                                                    |
| CNG1     | A1314029, CCNG, CYCG, cyclin G1                                                                                                                                                                                                                                                                                                                                                                                                                                                                                                   |
| CCNK     | AW123198, AW413594, CP, CPR4, CycK, cyclin K, IDDHF                                                                                                                                                                                                                                                                                                                                                                                                                                                                               |
| CDK2     | A630093Y05RIK, CDC2-RELATED KINASE, CDKN2, Cyclin A associated kinase, cyclin-dependent kinase 2, CYCLIN E ASSOCIATED KINASE, p33(CDK2)                                                                                                                                                                                                                                                                                                                                                                                           |
| CDK4     | CMM3, Crk, Crk3, cyclin-dependent kinase 4, LOC100362034, PSK-J3                                                                                                                                                                                                                                                                                                                                                                                                                                                                  |
| CDKN1A   | CAP, CAP20, CDK, CDK1, Cdkn, CDKN1, CDKN1A, CI, CIP1, cyclin-dependent kinase inhibitor 1A, cyclin-dependent kinase inhibitor 1A (P21), mda, MDA-6, P2, P21, p21C, p21Cip, p21CIP1, p21W, p21WAF, p21Waf1, Pz1 Cyclin-Dependent Kinase Inhibitor, SD, SDI1, UV96, Waf, WAF1                                                                                                                                                                                                                                                       |
| CHEK1    | C85740, checkpoint kinase 1, CHK1, rad27                                                                                                                                                                                                                                                                                                                                                                                                                                                                                          |
| CHEK2    | CDS1, Check2, checkpoint kinase 2, CHK2, hCds1, HUCD51, LFS2, PP1425, Rad, RAD53                                                                                                                                                                                                                                                                                                                                                                                                                                                  |
| COQ8A    | 4632432J16RIK, Adck, ADCK3, A1462003, ARCA2, Cabc, ABC1, coenzyme Q8A, COQ10D4, COQ8, LOC100506460, mKIAA0451, SCAR9                                                                                                                                                                                                                                                                                                                                                                                                              |
| CSNK1D   | 1200006A05RIK, AA409348, ASPS, casein kinase 1 delta, casein kinase 1, delta, casein kinase 1 $\delta$ , casein kinase 1, $\delta$ , Ck1 delta, CK1 $\delta$ , CKId, CKI-delta, CKI- $\delta$ , D930010H05RIK, FASP2, HCKID                                                                                                                                                                                                                                                                                                       |
| CTNBN1   | armadillo, Beta-cat, beta CATENIN, Bfc, Cat, CATENIN beta, catenin beta 1, catenin (cadherin associated protein), beta 1, catenin (cadherin associated protein), $\beta$ 1, CATENIN $\beta$ , catenin $\beta$ 1, CATNB, CTNBN, CTNNB, CTNN beta, CTNN $\beta$ , EVR7, Mesc, MRD19, NEDSDV, $\beta$ -cat, $\beta$ -catenin                                                                                                                                                                                                         |
| DRAM1    | 1200002N14RIK, DNA-damage regulated autophagy modulator 1, DRAM, FLJ11259                                                                                                                                                                                                                                                                                                                                                                                                                                                         |
| E2F1     | E2f, E2F transcription factor 1, mKIAA4009, RBAP1, RBBP3, RBP3, Tg(Wnt1-cre)2Sor                                                                                                                                                                                                                                                                                                                                                                                                                                                  |
| EP300    | A430090G16, A730011L11, E1A binding protein p300, KAT3, KAT3B, MKHK2, p30, p300, p300 HAT, RSTS2                                                                                                                                                                                                                                                                                                                                                                                                                                  |
| FAS      | A1196731, ALPS1A, AP, APO-1, APT1, CD95, CD95L, CD95 receptor, FAS1, FAS/APO1, Fas cell surface death receptor, FasR, FASTM, Fas (TNF receptor superfamily member 6), lpr, Receptor for Fas Ligand, Receptors for Fas Ligand, TNF, Tnfr, TNFR6, Tnfr receptor member 6, TNFRSF6                                                                                                                                                                                                                                                   |
| GML      | 1700057K19RIK, EG625599, glycosylphosphatidylinositol anchored molecule like, glycosylphosphatidylinositol anchored molecule like 2, Gml2, HemT, Hemt1, LY6DL                                                                                                                                                                                                                                                                                                                                                                     |
| GNL3     | C77032, E2IG3, G protein nuclear 3, guanine nucleotide binding protein-like 3 (nucleolar), NNP47, NS, NUCLEOSTEMIN, NUG1                                                                                                                                                                                                                                                                                                                                                                                                          |
| GSK3B    | 7330414F15RIK, 8430431H08RIK, C86142, glycogen synthase kinase 3 beta, glycogen synthase kinase 3 $\beta$ , GSK-, GSK-3, GSK-3 $\beta$ , GSK-3beta, GSK-3 $\beta$ , GSKbeta, GSK $\beta$ , Tpk1                                                                                                                                                                                                                                                                                                                                   |
| HDAC1    | GON-10, HD1, HDAC, Hdac1-ps, histone deacetylase 1, KDAC1, LOC630524, MommeD, MommeD5, RP, RPD3, RPD3L1                                                                                                                                                                                                                                                                                                                                                                                                                           |
| HDAC9    | AK143298, AV022454, D030072B18, D030072B18Rik, HD, HD7, HD7B, HD9, HDAC, HDAC7, HDAC7B, HDAC9B, HDAC9FL, HDAC C, HDRP, histone deacetylase 9, LOC100054041, LOC100861990, Mi, MITR, mKIAA0744, RGD1310748, RGD1563092                                                                                                                                                                                                                                                                                                             |
| HIF1A    | AA959795, bHLHe7, bHLHe78, HIF-1, HIF1-ALPHA, HIF-1alpha (hydroxylated), HIF-1 $\alpha$ , HIF-1 $\alpha$ (hydroxylated), Hypoxia inducible factor 1 alpha subunit, hypoxia inducible factor 1, alpha subunit, hypoxia inducible factor 1 subunit alpha, hypoxia inducible factor 1 subunit $\alpha$ , Hypoxia inducible factor 1 $\alpha$ subunit, hypoxia inducible factor 1 $\alpha$ subunit, MO, MOP1, PASD8                                                                                                                   |
| HIPK2    | 1110014O20RIK, B230339E18RIK, homeodomain interacting protein kinase 2, LOC100505582, LOC653052, PRO0593, St, Stank                                                                                                                                                                                                                                                                                                                                                                                                               |
| JMY      | AA591059, junction-mediating and regulatory protein, junction mediating and regulatory protein, p53 cofactor, WHAMM2, WHDC1L3                                                                                                                                                                                                                                                                                                                                                                                                     |
| JUN      | Activator protein 1, AP-1, AP1-1, c-jun, cJUN, Junc, jun proto-oncogene, Jun proto-oncogene, AP-1 transcription factor subunit, LOC100288387, LOC100291417, LOC100293034, p39, vJUN, V-jun Avian Sarcoma Virus 17 Oncogene Homolog, V-jun Sarcoma Virus 17 Oncogene Homolog                                                                                                                                                                                                                                                       |
| KAT2B    | A930006P13RIK, A1461839, AW536563, CAF, K(y)isyl) acetyltransferase 2B, lysine acetyltransferase 2B, Pc, PCAF, P/CAF, Pcaf-b                                                                                                                                                                                                                                                                                                                                                                                                      |
| MAPK14   | Crk, CRK1, CSB, CSBP, CSBP2, CSBP1, EXP, Hog, LOC101929346, MAPK p38, mitogen-activated protein kinase 14, Mxi, Mxi2, p3, p38-, p38a, p38ALPHA, p38Hog, p38 kinase, p38M, p38 MAPK, P38 Map Kinase, p38 MAP kinases alpha and $\beta$ , p38 MAP kinases $\alpha$ and $\beta$ , p38 MAPK- $\alpha$ , p38- $\alpha$ , PRKM14, PRKM15, RK, SAPK2A, SAPK p38 alpha, SAPK p38 $\alpha$                                                                                                                                                 |
| MAPK8    | A1849689, C-JUN N-TERMINAL KINASE1, JNK, JNK1, JNK1A2, JNK21B1/2, JNK-46, mitogen-activated protein kinase 8, p46JNK1, p46JNK1 alpha, p46JNK1 $\alpha$ , Prk, PRKM8, SAPK1, SAPK1c, Sapk gamma, SAPK P46, Sapk $\gamma$ , STRESS-ACTIVATED protein KINASE-LIKE KINASE                                                                                                                                                                                                                                                             |
| MDM2     | 1700007J15RIK, AA415488, ACTFS, hdm2, HDMX, LSKB, MDM2-A1, MDM2 proto-oncogene, MGC5370, Transformed 3T3 cell double minute 2, transformed mouse 3T3 cell double minute 2                                                                                                                                                                                                                                                                                                                                                         |
| MDM4     | 4933417N07RIK, AA414968, AL023055, AU018793, AU021806, BMFS6, C85810, HDMX, LOC102633382, MDM4 regulator of p53, MDMX, MRP1, transformed mouse 3T3 cell double minute 4                                                                                                                                                                                                                                                                                                                                                           |
| MED1     | A1480703, ARC205, CRSP, CRSP1, CRSP200, CRSP205, CRSP210, DRIP, DRIP205, DRIP230, I11Jus, I11Jus15, Med220, mediator complex subunit 1, P, PBP, PPARBP, PARGBP, RB18A, RGD1559552, TRAP, TRAP220, TRIP-2                                                                                                                                                                                                                                                                                                                          |
| p19 Arf  | A, Arf, ARF-INK4a, CDK41, CDKN2, CMM2, CYCLIN-DEPENDENT KINASE INHIBITOR 2A, INK4, INK4A, INK4a-ARF, Ink4a/Arf, MLM, MTS, MTS-1, p1, p14ARF/ p16INK4a, p16, p16/ARF, p16Cdkn2a, p16l, p16 INK4, p16/ INK4a, P19, p19ARF, Pct, PCTR1, TP16                                                                                                                                                                                                                                                                                         |
| PCNA     | ATLD2, Pcnar/cyclin, PCNAR, proliferating cell nuclear antigen                                                                                                                                                                                                                                                                                                                                                                                                                                                                    |
| PERP     | 1110017A08RIK, dJ496H19.1, ineligileperp, KCP, KCP1, KRTC, KRTCAP1, p53 apoptosis-associated target, p53 apoptosis effector related to PMP22, PERP, TP53 apoptosis effector, PIG, PIGPC1, THW                                                                                                                                                                                                                                                                                                                                     |
| PI3K     | 1-phosphatidylinositol 3-kinase, 2.7.1.137, ATP:1-phosphatidyl-D-myo-inositol 3-phosphotransferase, Phosphatidylinositol 3 kinase, phosphatidylinositol 3'-kinase, PI3-kinase, Ptdlns 3 Kinase, type III phosphoinositide 3-kinase, type I phosphatidylinositol kinase, Vps34p                                                                                                                                                                                                                                                    |
| PIAS1    | 2900068C24RIK, Ddxbp, DDXBP1, GB, GBP, GU/IRH-III, protein inhibitor of activated STAT 1, protein inhibitor of activated STAT, 1, ZMI23                                                                                                                                                                                                                                                                                                                                                                                           |
| PIDD1    | 1200011D09RIK, AU042446, LOC100911519, Lr, LRDD, p53-induced death domain protein 1, p53-induced protein with a death domain-like, Pi, PIDD                                                                                                                                                                                                                                                                                                                                                                                       |
| PLAGL1   | 2610311E24R, 2610311E24RIK, LOT1, PLAG1 like zinc finger 1, pleiomorphic adenoma gene-like 1, ZAC, ZAC1                                                                                                                                                                                                                                                                                                                                                                                                                           |
| PMAIP1   | APR, N, NOXA, phorbol-12-myristate-13-acetate-induced protein 1                                                                                                                                                                                                                                                                                                                                                                                                                                                                   |
| PML      | 1200009E24RIK, A1661194, PML nuclear body scaffold, PP8675, promyelocytic leukaemia, RGD1562602, NF71, Trim, TRIM19                                                                                                                                                                                                                                                                                                                                                                                                               |
| PRKDC    | A1326410, AU019811, DNA-, DNA-DEPENDENT protein KINASE, DNAPDcs, DNAPK, DNA-PKC, DNA-PKcs, DNPK1, DOX, DOXNPH, dxn, dxnph, HYRC, HYRC1, IMD26, p350, p460, Prkdc predicted, protein kinase, DNA activated, catalytic polypeptide, protein kinase, DNA-activated, catalytic subunit, scid, slip, XRCC, XRCC7                                                                                                                                                                                                                       |
| PTEN     | 10q23del, 2310035O07RIK, A130070J02RIK, A1463227, B43020317RIK, BZS, CWS1, DEC, GLM2, MHAM, MMAC, MMAC1, MUTATED IN MULTIPLE ADVANCED CANCERS, mutated in multiple advanced cancers 1, phosphatase and tensin homolog, PTEN1, PTENbeta, TEP, TEP1                                                                                                                                                                                                                                                                                 |
| RB1      | OSRC, p, p105, p105-Rb, p110 RB, p110-RB1, pp105, pp110, PPP1R130, pRb, R, RB, RB-ASSOCIATED, RB transcriptional corepressor 1, Retinoblastoma tumor-suppression protein rb                                                                                                                                                                                                                                                                                                                                                       |
| Rpm      | 2410012A13RIK, Re, REPRIMO, reprimo, TP53 dependent G2 arrest mediator candidate, reprimo, TP53 dependent G2 arrest mediator homolog                                                                                                                                                                                                                                                                                                                                                                                              |
| RRM2B    | MGC42216, MTDPS58A, MTDPS58B, P53R2, Ribonucleotide Reductase M2 B (TP53 Inducible), ribonucleotide reductase regulatory TP53 inducible subunit M2B                                                                                                                                                                                                                                                                                                                                                                               |
| SCO2     | CEMCOX1, ECGF1, Gliostatin, MC4DN2, MYP6, PD-ECGF, SCOL, SCO2 cytochrome c oxidase assembly protein, synthesis of cytochrome C oxidase 2, TdrPase, TP, TYMP                                                                                                                                                                                                                                                                                                                                                                       |
| SERPINB5 | 1110036M19RIK, A1462524, A14646751, M, Maspin, ova, ovalbumin, PI-5, S, serine (or cysteine) peptidase inhibitor, clade B, member 5, serpin family B member 5, Spi7                                                                                                                                                                                                                                                                                                                                                               |
| SERPINE2 | B230326M24RIK, CRG, GDN, GDNPF, GDNPN1, GLIA DERIVED NEXIN, ne, NEXIN1, P, PAI-1, P-I7, PN, PN-1, PNI, PROTEASE NEXIN1, S, serine (or cysteine) peptidase inhibitor, clade E, member 2, Serpin-4, serpin family E member 2, Spi4, Spin4                                                                                                                                                                                                                                                                                           |
| SFN      | 14-3-3, 14-3-3 Sigma, 14-3-3 $\sigma$ , E, ER, HME1, Mme1, Stratifin, Ywh, YWHAS                                                                                                                                                                                                                                                                                                                                                                                                                                                  |
| SIRT1    | AA673258, S, Si, SIRT, Sir2a, SIRTalpha, SIRT2L1, Sir2 $\alpha$ , SIRT, sirtuin 1                                                                                                                                                                                                                                                                                                                                                                                                                                                 |
| SNAI2    | S, Si, Siu, SLUG, SLUGH, SLUGH1, SNAIL2, snail family transcriptional repressor 2, snail family zinc finger 2, WS2D                                                                                                                                                                                                                                                                                                                                                                                                               |
| ST13     | 1110007I03RIK, 3110002K08RIK, AAG2, AW555194, FAM10A1, FAM10A4, HIP, HOP, HSP, HSPABP, HSPABP1, NA+, K+ atpase 1, p4, P48, PROO, PRO0786, SN, SNC6, ST13 Hsp70 interacting protein, ST13, Hsp70 interacting protein, suppression of tumorigenicity 13, suppression of tumorigenicity 13                                                                                                                                                                                                                                           |
| STAG1    | AU045003, COHESIN subunit SA-1, MRD47, SA, SA-1, Scc, Scc3, SCC3A, Stromal antigen 1                                                                                                                                                                                                                                                                                                                                                                                                                                              |
| THBS1    | tbs, tbsp1, THBS, thrombospondin 1, THSP, TS, TS-1, TSP, TSP-1                                                                                                                                                                                                                                                                                                                                                                                                                                                                    |
| TIGAR    | 9630033F20RIK, AA793651, A1595337, C12orf5, C79710, C85509, FR2BP, Ti, TP53 induced glycolysis regulatory phosphatase, Trp53 induced glycolysis regulatory phosphatase                                                                                                                                                                                                                                                                                                                                                            |
| TOPBP1   | 1110031N14RIK, 2810429C13RIK, A1256758, D430026L04RIK, DNA topoisomerase II binding protein 1, Dpb11, mKIAA0259, RGD1562949, TOP2BP1, TOPO2 BP, TOPOISOMERASE2 binding, topoisomerase (DNA) II binding protein 1                                                                                                                                                                                                                                                                                                                  |
| TP53     | bbi, BCC7, bfy, bhy, BMFS5, LFS1, p4, p44, p5, P53, P53 cellular tumour antigen, p53 tumour suppressor, transformation related protein 53, TRP53, tumor protein p53, tumour protein p53                                                                                                                                                                                                                                                                                                                                           |
| TP53AIP1 | P53AIP1, tumor protein p53 regulated apoptosis inducing protein 1, tumour protein p53 regulated apoptosis inducing protein 1                                                                                                                                                                                                                                                                                                                                                                                                      |
| TP53I3   | PIG3, tumor protein p53 inducible protein 3, tumour protein p53 inducible protein 3                                                                                                                                                                                                                                                                                                                                                                                                                                               |
| TP53INP1 | 2700057G22RIK, DKFZp434M1317, p53DINP1, S, Si, SIP, STNP, Te, Teap, Thymsus Expressed Acidic, TP53DINP1, TP53DINP1alpha, TP53INP1A, TP53INP1B, transformation related protein 53 inducible nuclear protein 1, TP53inp1, tumor protein p53 inducible nuclear protein 1, tumour protein p53 inducible nuclear protein 1                                                                                                                                                                                                             |
| TP63     | A1462811, AIS, B(p51A), B(p51B), delta, Delta N p63, Delta N p63 Alpha, EEC3, KET, LMS, NBP, OFC8, p51/p, P51/P63, p53CP, p6, p63, p63 alpha isoform, p63 gamma isoform, p63/p40, p63 $\gamma$ isoform, p7, p73H, P73, RHS, SHFM4, Tap, Tap63, TP53CP, TP53L, TP3L, TP3L, transformation related protein 63, Trp5, Trp53p1, Trp63, TUMOR protein 63 KDA with STRONG HOMOLOGY TO P53, tumor protein p63, tumour protein 63 KDA with STRONG HOMOLOGY TO P53, tumour protein p63, $\delta$ , $\delta$ N p63, $\delta$ N p63 $\alpha$ |
| TRIM29   | 1110047J21RIK, 2810431N19RIK, 4732461M22RIK, A119726, ATDC, tripartite motif-containing 29                                                                                                                                                                                                                                                                                                                                                                                                                                        |
| Trp73    | delta, p7, P73, p73RhoGAP, Tap, transformation related protein 73, Trp73, tumor protein p73, tumour protein p73, $\delta$                                                                                                                                                                                                                                                                                                                                                                                                         |
| UCN-01   | 112953-11-4, (2S,3R,4R,6R,18R)-18-hydroxy-3-methoxy-2-methyl-4-(methylamino)-29-oxa-1,7,17-triazaoctacyclo[12.12.2.12.6.07.28.08.13.015.19.020.27.021.26]nonacos-8,10,12,14,19,21,23,25,27-nonaen-16-one, 7-hydroxystaurosporine, 8,12-epoxy-1H,8-2,7b,12a-triazadibenzo[a,g]cycliclonona(cde)triinden-1-one, 2,3,9,10,11,12-hexahydro-3-hydroxy-9-methoxy-8-methyl-10-(methylamino)-, C28H26N4O4, KW-2401, NSC-638850                                                                                                            |
| WT1      | D630046I19RIK, GUD, NPHS4, WAGR, Wilms tumor 1 homolog, wilms' tumour, wilms tumour 1, Wilms tumour 1 homolog, Wilms tumour-suppressor, Wilms' tumour suppressor, WIT-2, WT, WT1 transcription factor, WT33                                                                                                                                                                                                                                                                                                                       |



# Pathway Analysis Using IPA Software; canonical pathway

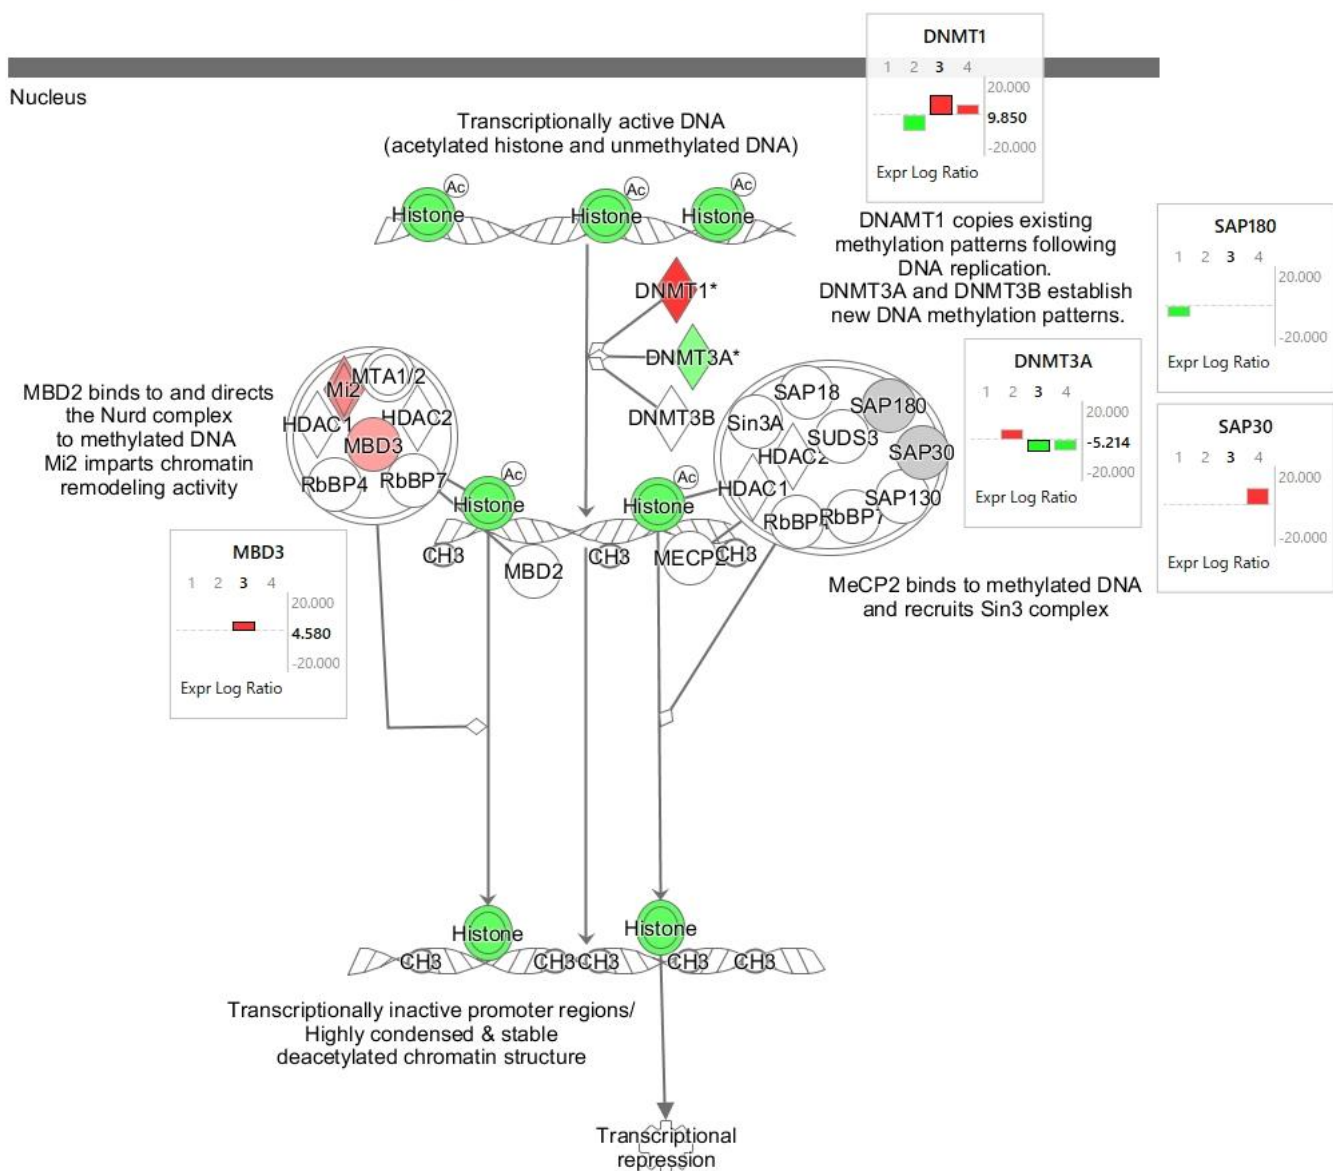

Figure S30. DNA Methylation and Transcriptional Repression Signaling  
1. 1 h; 2. 6 h; 3. 24 h; 4. 8 days.

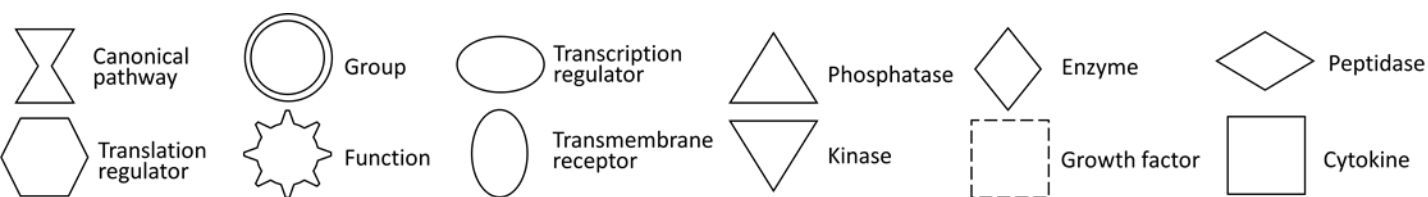

Red: Increased, FDR<0.05 versus solvent control

Green: Decreased, FDR<0.05 versus solvent control

| Symbol  | Synonym(s)                                                                                                                                                                                                                                                                          |
|---------|-------------------------------------------------------------------------------------------------------------------------------------------------------------------------------------------------------------------------------------------------------------------------------------|
| ARID4B  | AT-rich interaction domain 4B, AT rich interactive domain 4B (RBP1-like), AT-rich interactive domain-containing protein 4B-like, BCAA, BRC, BRCAA1, LOC100912163, RBBP, RBBP1L1, Rbp, RBP1L1, RBP1-LIKE, SAP, SAP180                                                                |
| DNMT1   | ADCADN, AIM, CXXC9, DMT, DNA methyltransferase 1, DNA methyltransferase (cytosine-5) 1, DNA MTASE, DNA MTase Hsal, DNMT, HSN1E, MCMT, Met-1, m.Hsal, m.Mmul, MommeD, MommeD2, MTa, MTase                                                                                            |
| DNMT3A  | DNA Methyltransferase 3A, DNA methyltransferase 3 alpha, DNA methyltransferase 3 $\alpha$ , DNA MTase HsallIA, DNMT3A2, HESJAS, M.HsallIA, MmullIA, TBRS                                                                                                                            |
| DNMT3B  | DNA Methyltransferase 3B, DNA methyltransferase 3 beta, DNA methyltransferase 3 $\beta$ , DNA MTase HsallIB, ICF, ICF1, M.HsallIB, MmullIB                                                                                                                                          |
| HDAC1   | GON-10, HD1, HDAC, Hdac1-ps, histone deacetylase 1, KDAC1, LOC630524, MommeD, MommeD5, RP, RPD3, RPD3L1                                                                                                                                                                             |
| HDAC2   | D10Wsu179, D10Wsu179e, HD2, histone deacetylase 2, KDAC2, mRPD3, RGD: 619976, RPD3, YAF1, Yy1b, Yy1bp                                                                                                                                                                               |
| HISTONE | HISTONES                                                                                                                                                                                                                                                                            |
| MBD2    | DMTase, LOC684150, MBD2a, methyl-CpG binding domain protein 2, NY-CO-41                                                                                                                                                                                                             |
| MBD3    | A1181826, AU019209, methyl-CpG binding domain protein 3                                                                                                                                                                                                                             |
| MECP2   | 1500041B07Rik, AUTSX3, D630021H01RIK, Mbd5, Mecp2 Beta, Mecp2 $\beta$ , methyl-CpG binding protein 2, MRX16, MRX79, MRXS13, MRXSL, PPMX, RS, RTS, RTT, WBP1, WBP10                                                                                                                  |
| Mi2     | Mi-2 alpha/beta, Mi-2 $\alpha/\beta$                                                                                                                                                                                                                                                |
| NuRD    | Mi2-NuRD                                                                                                                                                                                                                                                                            |
| RBBP4   | CAF1 P48, CAF1/p48, CAF-1 subunit C, CAF-I 48 kDa subunit, lin-53, LOC681419, LOC685491, mRbAp48, NURF55, p46/48, RBA, RBAP48, Rb-associated protein p48, RB binding protein 4, chromatin remodeling factor, retinoblastoma binding protein 4, chromatin remodeling factor, YQ51D06 |
| RBBP7   | AA409861, A1173248, AU019541, BB114024, mRbAp46, RbAp46, Rb-associated protein p46, RBB7, RB binding protein 7, chromatin remodeling factor, retinoblastoma binding protein 7, chromatin remodeling factor                                                                          |
| SAP130  | 2610304F09RIK, 6720406D06, RGD1311657, Sin3A associated protein, Sin3A associated protein 130                                                                                                                                                                                       |
| SAP18   | 2HOR0202, C530046K05Rik, D11Ert539, D11Ert539e, EMegR, EMegR4, Gm10094, RGD1561590, Sa, Sap18a, Sap18b, SAP18P, Si, similar to SAP18, Sin3A associated protein 18, Sin3-associated polypeptide 18, Sin3-associated polypeptide 18B, Sinbp1                                          |
| SAP30   | Sin3A associated protein 30, sin3 associated polypeptide                                                                                                                                                                                                                            |
| SIN3A   | AW553200, mKIAA4126, mS, MSIN3A, S, SIN3, SIN3 transcription regulator family member A, transcriptional regulator, SIN3A (yeast), WITKOS                                                                                                                                            |
| SUDS3   | 2400003N08RIK, 2410008L21Rik, AU067672, LOC105378257, mSds3, RGD1305986, SAP45, SDS3, SDS3 homolog, SIN3A corepressor complex component, suppressor of defective silencing 3 homolog (S. cerevisiae)                                                                                |

Table S31. DNA methylation

| Gene Symbol | Gene Title                                 | Probe_ID     | 1 h      |          | 6 h      |          | 24 h     |          | 8 days   |          |
|-------------|--------------------------------------------|--------------|----------|----------|----------|----------|----------|----------|----------|----------|
|             |                                            |              | FDR      | FDR      | FDR      | FDR      | FDR      | FDR      | FDR      | FDR      |
|             |                                            |              | increase | decrease | increase | decrease | increase | decrease | increase | decrease |
| Dnmt1       | DNA methyltransferase (cytosine-5) 1       | 1422946_a_at | 1.1810   | 1.3288   | 1.0094   | 0.0068   | 0.0011   | 1.0017   | 0.2069   | 1.0211   |
|             |                                            | 1435122_x_at | 0.6479   | 0.9653   | 1.0076   | 0.0043   | 0.0033   | 1.0040   | 0.0944   | 1.0170   |
|             |                                            | 1447877_x_at | 1.1074   | 1.3172   | 1.0088   | 0.0057   | 0.0094   | 1.0077   | 0.0265   | 1.0081   |
| Dnmt3a      | DNA methyltransferase 3A                   | 1423063_at   | 0.9960   | 0.9920   | 0.0331   | 1.0213   | 1.0227   | 0.0602   | 1.0278   | 0.0912   |
|             |                                            | 1423064_at   | 1.0156   | 0.9159   | 0.7573   | 1.1016   | 1.3930   | 1.3869   | 0.9028   | 1.1325   |
|             |                                            | 1423065_at   | 1.1675   | 1.3113   | 0.0331   | 1.0213   | 1.0086   | 0.3005   | 1.0214   | 0.0518   |
|             |                                            | 1423066_at   | 1.1132   | 1.3032   | 0.0294   | 1.0200   | 1.0693   | 0.1280   | 1.0575   | 0.1882   |
|             |                                            | 1460324_at   | 1.1477   | 1.0148   | 0.0494   | 1.0265   | 1.0129   | 0.0269   | 1.0196   | 0.0454   |
| Dnmt3b      | DNA methyltransferase 3B                   | 1418351_a_at | 1.2163   | 0.9903   | 1.0438   | 0.1238   | 1.1472   | 1.3373   | 0.9622   | 1.1789   |
|             |                                            | 1442655_at   | 1.1603   | 0.9688   | 1.1114   | 1.1061   | 1.0355   | 1.3452   | 0.8646   | 1.1652   |
|             |                                            | 1449052_a_at | 0.3989   | 0.9673   | 1.0380   | 0.0991   | 1.2969   | 1.2444   | 1.1440   | 1.2240   |
| Dnmt3l      | DNA (cytosine-5-)-methyltransferase 3-like | 1425035_s_at | 1.0413   | 1.0820   | 1.0638   | 1.3174   | 1.0121   | 1.3655   | 1.0853   | 1.2078   |
| Sap130      | Sin3A associated protein                   | 1428857_at   | 1.1612   | 0.9657   | 1.0675   | 1.3788   | 1.1763   | 1.0828   | 1.1387   | 1.2193   |
| Sap18       | Sin3-associated polypeptide 18             | 1419443_at   | 1.0219   | 1.0343   | 1.0660   | 1.3713   | 0.5996   | 1.0178   | 1.1598   | 1.0619   |
|             |                                            | 1449480_at   | 1.1917   | 0.9732   | 1.0645   | 1.3695   | 0.3978   | 1.0732   | 1.0724   | 1.2128   |
| Sap30       | sin3 associated polypeptide                | 1417719_at   | 0.3031   | 0.9775   | 0.3017   | 1.0809   | 0.0628   | 1.0235   | 0.0028   | 1.0029   |
| Sap30bp     | SAP30 binding protein                      | 1418977_at   | 1.1168   | 1.0043   | 1.0328   | 1.1058   | 1.3403   | 1.0286   | 1.1004   | 1.2185   |
|             |                                            | 1449295_at   | 0.9673   | 1.1825   | 1.1455   | 1.1613   | 1.0277   | 1.3298   | 0.9110   | 1.1259   |

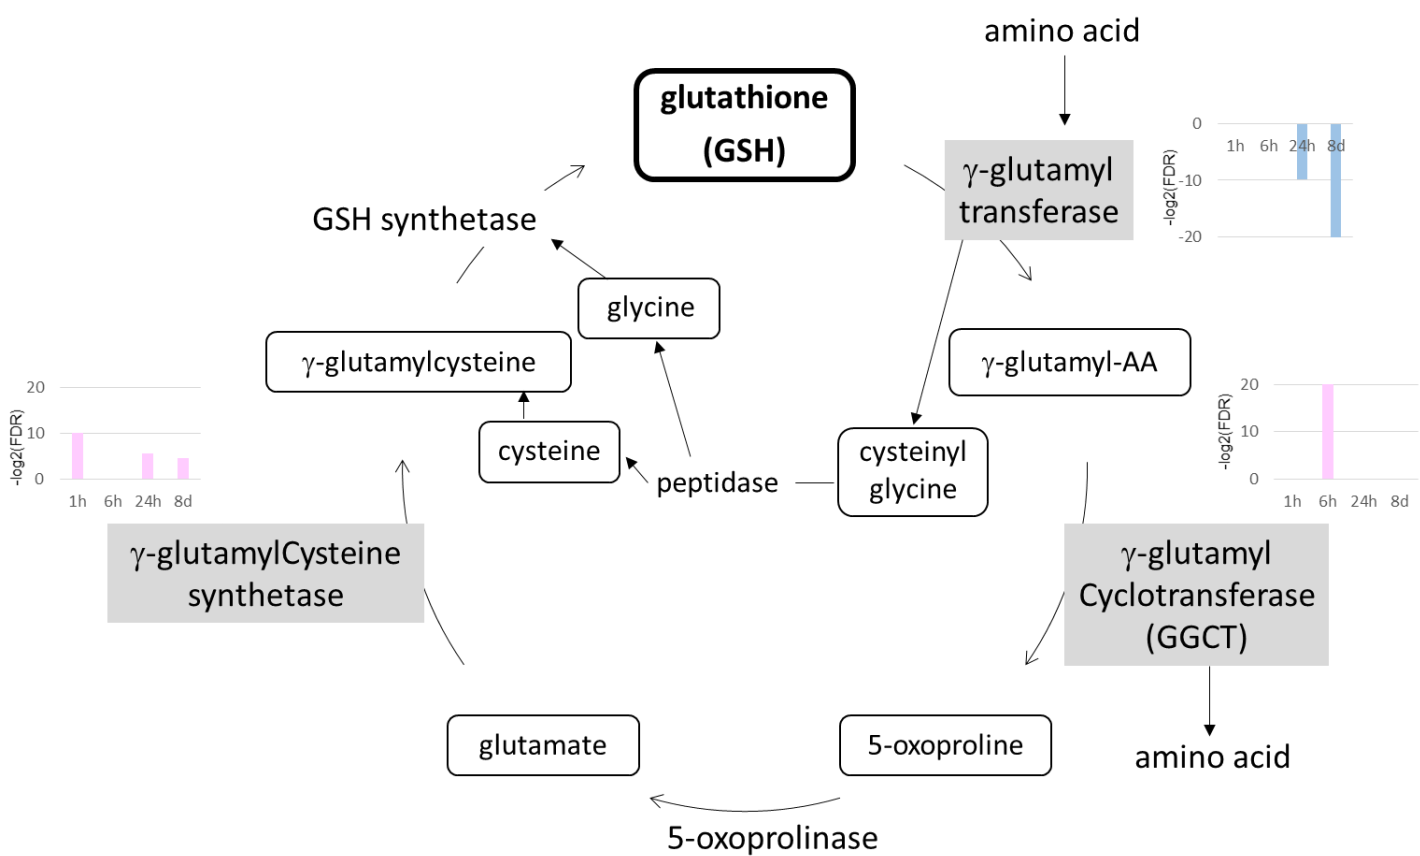

Figure S32. Glutamyl Cycle  
8d. 8 days.

Table S33. Gene expression variation associated with cytochromes P450

| Gene symbol |                                                        | 1 h                 | 6 h                               | 24 h              | 8 days            |
|-------------|--------------------------------------------------------|---------------------|-----------------------------------|-------------------|-------------------|
| Cyp1a1      | cytochrome P450, family 1, subfamily a, polypeptide 1  | ↑<br>(1422217_a_at) |                                   |                   |                   |
| Cyp1b1      | cytochrome P450, family 1, subfamily b, polypeptide 1  | ↑<br>(1416612_at)   | ↓<br>(1416612_at)<br>(1416613_at) |                   |                   |
| Cyp26b1     | cytochrome P450, family 26, subfamily b, polypeptide 1 | ↓<br>(1460011_at)   |                                   |                   | ↓<br>(1460011_at) |
| Cyp39a1     | cytochrome P450, family 39, subfamily a, polypeptide 1 |                     |                                   | ↓<br>(1418780_at) |                   |

↑ : Increased, FDR<0.05 versus solvent control  
↓ : Decreased, FDR<0.05 versus solvent control  
( ) : Probe ID

Pathway Analysis Using IPA Software; canonical pathway

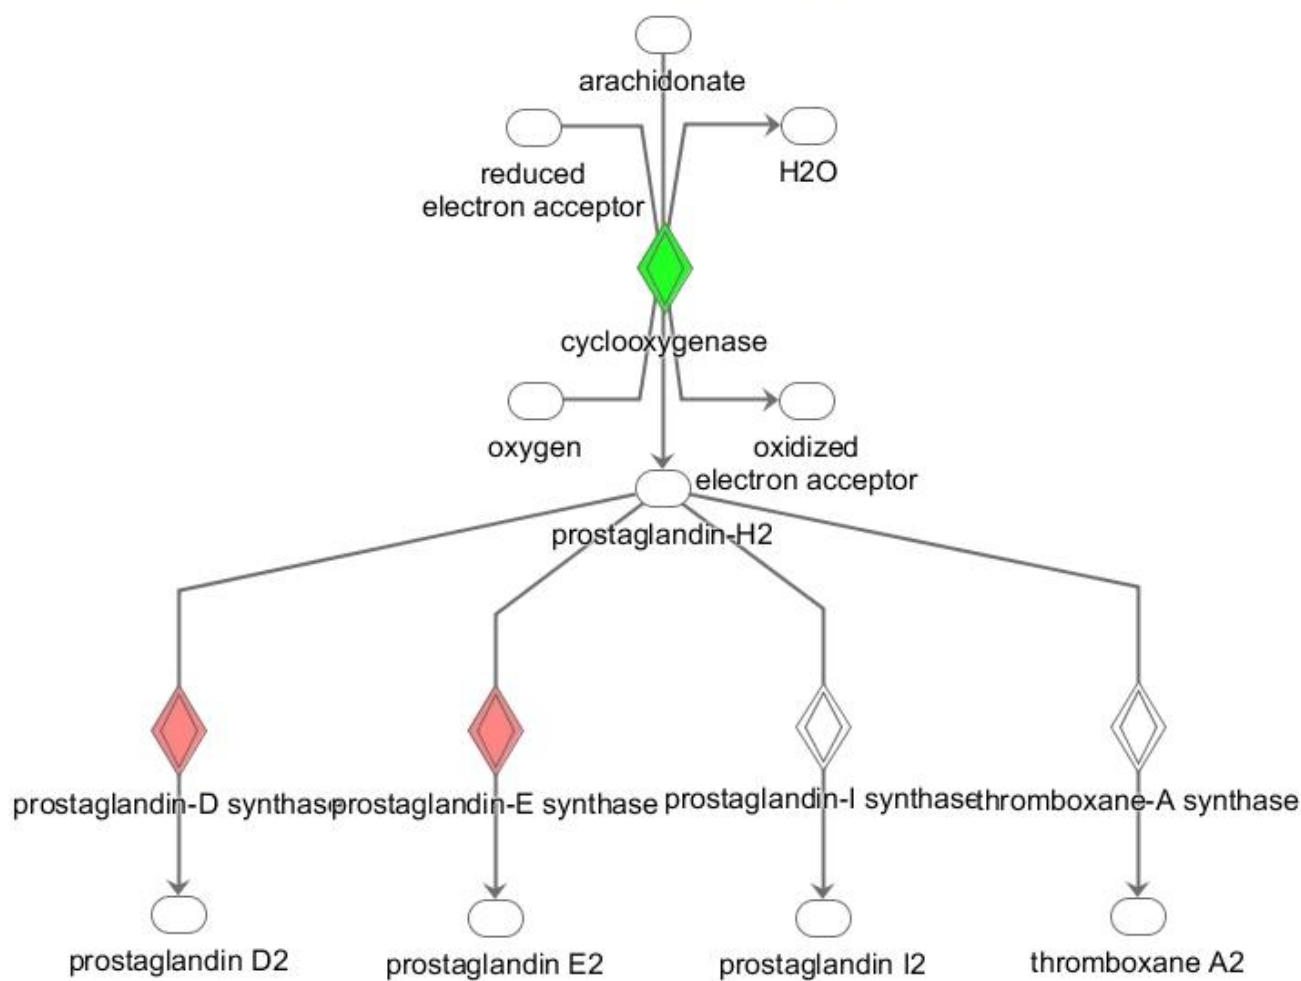

Figure S34. Prostanoid Biosynthesis at 1 h

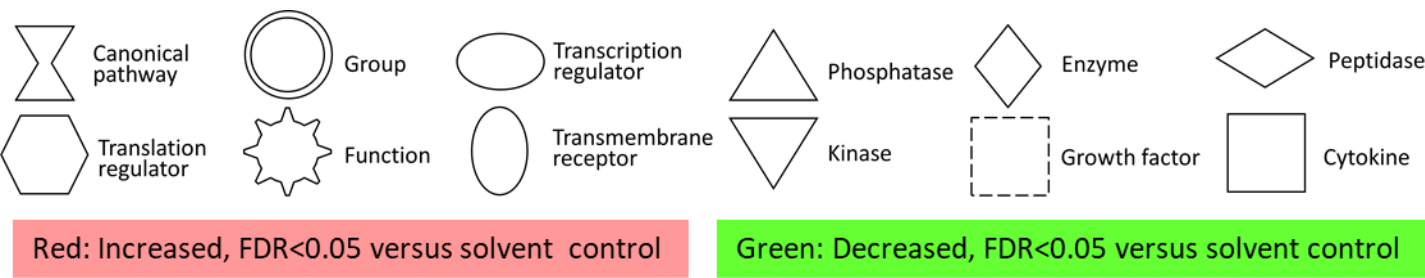

| Symbol                   | Synonym(s)                                                                                                                                                                                                                                                                                                                                                                                                                                                      |
|--------------------------|-----------------------------------------------------------------------------------------------------------------------------------------------------------------------------------------------------------------------------------------------------------------------------------------------------------------------------------------------------------------------------------------------------------------------------------------------------------------|
| arachidonate             | 20:4n-6, 506-32-1, 5,8,11,14-eicosatetraenoic acid, (all-Z)-, 5Z,8Z,11Z,14Z-arachidonic acid, (5Z,8Z,11Z,14Z)-icosa-5,8,11,14-tetraenoic acid, AA, AA-d8, ARA, arachidonate, C20:4(n-6), C20:4w6, C20H32O2, eicosa-5Z,8Z,11Z,14Z-tetraenoic acid, sodium arachidonate                                                                                                                                                                                           |
| cyclooxygenase           | 1.14.99.1, (5Z,8Z,11Z,14Z)-icosa-5,8,11,14-tetraenoate,hydrogen-donor:oxygen oxidoreductase, COX, COX1/2, fatty acid cyclooxygenase, PGHS, (PG)H synthase, PG synthetase, Prostaglandin-endoperoxide synthase, prostaglandin endoperoxide synthetase, prostaglandin G/H synthase, prostaglandin G/H synthase and cyclooxygenase, Prostaglandin h synthase, Prostaglandin Peroxidase, prostaglandin synthase, prostaglandin synthetase, PTGS, PTGS1/2            |
| prostaglandin D2         | 11-dehydroprostaglandin F2-alpha, 11-dehydroprostaglandin F2-α, 41598-07-6, (5Z,13E)-9alpha-hydroxy-11,15-dioxoprost-5,13-dienoate, (5Z,13E)-9alpha-hydroxy-11,15-dioxoprost-5,13-dienoic acid, C20H32O5, PGD2, prost-5,13-dien-1-oic acid, 9,15-dihydroxy-11-oxo-, (5Z,9-alpha,13E,15S)-, prost-5,13-dien-1-oic acid, 9,15-dihydroxy-11-oxo-, (5Z,9-α,13E,15S)-, (Z)-7-[(1R,2R,5S)-5-hydroxy-2-[(E,3S)-3-hydroxyoct-1-enyl]-3-oxocyclopentyl]hept-5-enoic acid |
| prostaglandin E2         | 363-24-6, (5Z,11a,13E,15S)-11,15-Dihydroxy-9-oxo-prosta-5,13-dien-1-oic acid, C20H32O5, Cervidil, dinoprostone, PGE2, Prepidil, Propess, Prostarmon E, Prostin E, Prostin E2, Prostin E2 Vaginal Suppository, (Z)-7-[(1R,2R,3R)-3-hydroxy-2-[(E,3S)-3-hydroxyoct-1-enyl]-5-oxocyclopentyl]hept-5-enoic acid                                                                                                                                                     |
| prostaglandin I2         | 35121-78-9, (5Z)-5-[(3aR,4R,5R,6aS)-5-hydroxy-4-[(E,3S)-3-hydroxyoct-1-enyl]-3,3a,4,5,6,6a-hexahydrocyclopenta[b]furan-2-ylidene]pentanoic acid, 61849-14-7, C20H32O5, epoprostenol sodium, Flolan, PGI2, PGX, prost-5,13-dien-1-oic acid, 6,9-epoxy-11,15-dihydroxy-, (5Z,9alpha,11alpha,13E,15S)-, prostacyclin, prostaglandin I, prostaglandin I2, sodium PGI2                                                                                               |
| prostaglandin-D synthase | (5,13)-(15S)-9alpha,11alpha-epidioxo-15-hydroxyprosta-5,13-dienoate D-isomerase, 5.3.99.2, PGH-PGD isomerase, prostaglandin-H2 D-isomerase, prostaglandin-R-prostaglandin D isomerase                                                                                                                                                                                                                                                                           |
| prostaglandin-E synthase | 5.3.99.3, (5Z,13E)-(15S)-9alpha,11alpha-epidioxo-15-hydroxyprosta-5,13-dienoate E-isomerase, endoperoxide isomerase, PGE2 isomerase, PGE isomerase, PGH-PGE isomerase, prostaglandin endoperoxide E2 isomerase, prostaglandin endoperoxide E isomerase, prostaglandin-H2 E-isomerase, prostaglandin H-E isomerase, prostaglandin R-prostaglandin E isomerase                                                                                                    |
| prostaglandin-H2         | 42935-17-1, 9,11-epoxymethano-PGH2, C20H32O5, PGH2, PGH2 endoperoxide, prost-5,13-dien-1-oic acid, 9,11-epidioxo-15-hydroxy-, (5Z,9alpha,11alpha,13E,15S)-, (Z)-7-[(1R,4S,5R,6R)-6-[(E,3S)-3-hydroxyoct-1-enyl]-2,3-dioxabicyclo[2.2.1]heptan-5-yl]hept-5-enoic acid                                                                                                                                                                                            |
| prostaglandin-I synthase | 5.3.99.4, (5Z,13E)-(15S)-9alpha,11alpha-epidioxo-15-hydroxyprosta-5,13-dienoate 6-isomerase, PGI2 synthase, PGI2 synthetase, prostacycline synthetase, prostacyclin synthase, prostagladin I2 synthetase                                                                                                                                                                                                                                                        |
| thromboxane A2           | 57576-52-0, 5-heptenoic acid, 7-(3-(3-hydroxy-1-octenyl)-2,6-dioxabicyclo[3.1.1]hept-4-yl)-, (1S-(1alpha,3alpha,3R*),4beta(Z),5alpha)-, C20H32O5, thromboxa-5,13-dien-1-oic acid, 9,11-epoxy-15-hydroxy-, (5Z,9alpha,11alpha,13E,15S)-, TxA2, (Z)-7-[(1S,3R,4S,5S)-3-[(E,3S)-3-hydroxyoct-1-enyl]-2,6-dioxabicyclo[3.1.1]heptan-4-yl]hept-5-enoic acid                                                                                                          |
| thromboxane-A synthase   | 5.3.99.5, (5Z,13E)-(15S)-9alpha,11alpha-epidioxo-15-hydroxyprosta-5,13-dienoate thromboxane-A2-isomerase, thromboxane synthase                                                                                                                                                                                                                                                                                                                                  |

# Pathway Analysis Using IPA Software; canonical pathway

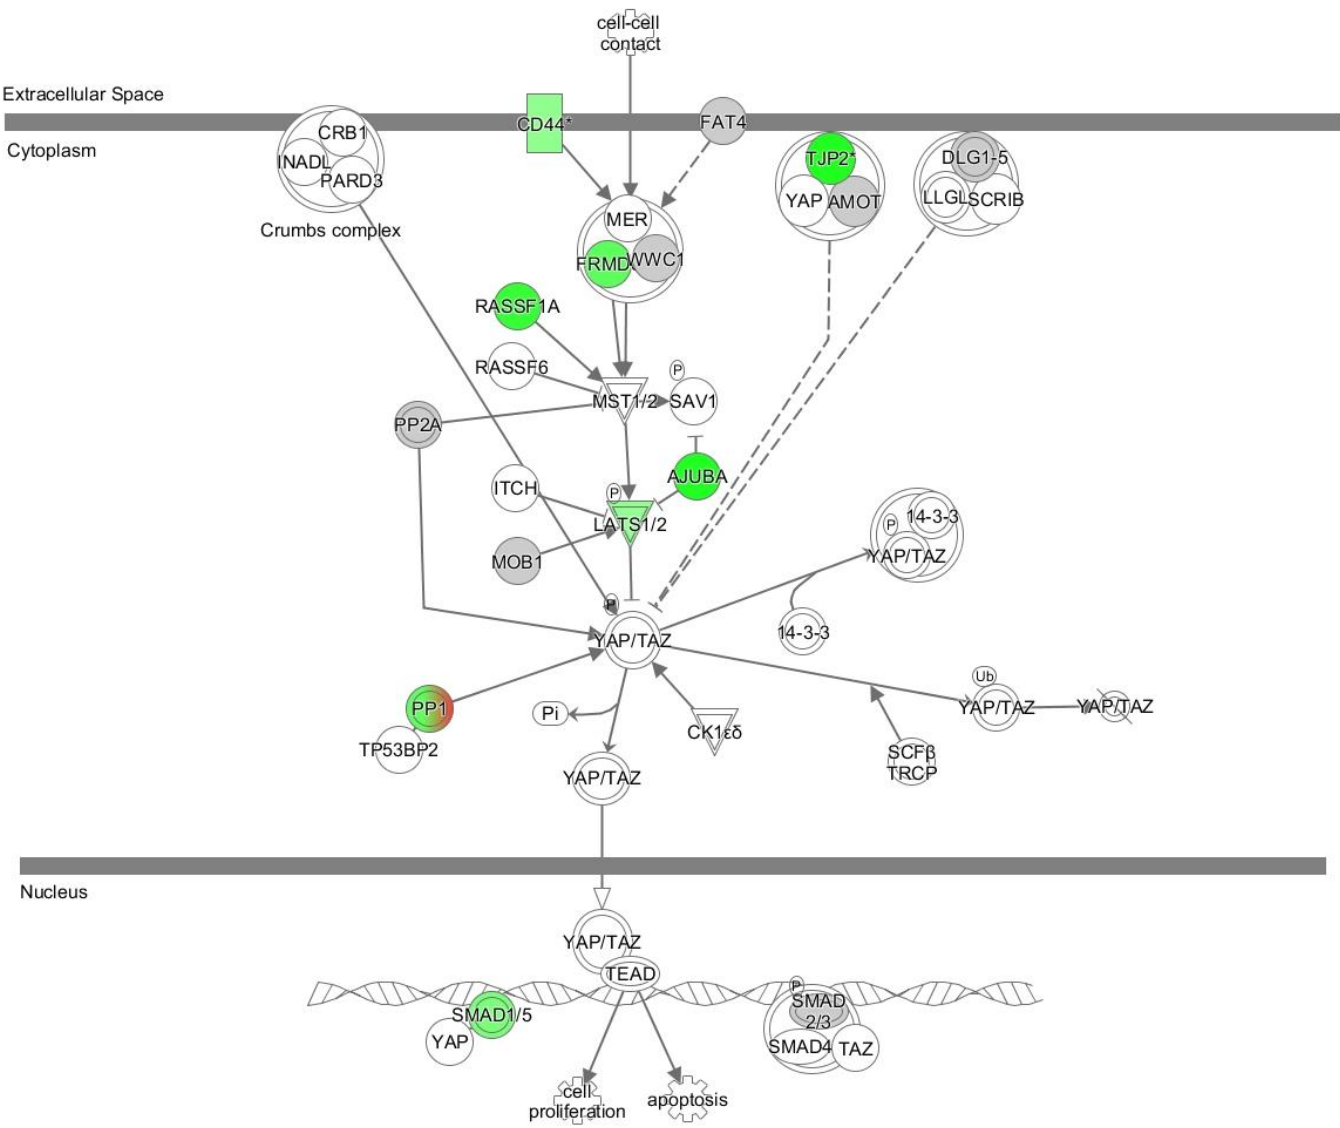

Figure S35. Hippo Signaling at 1 h

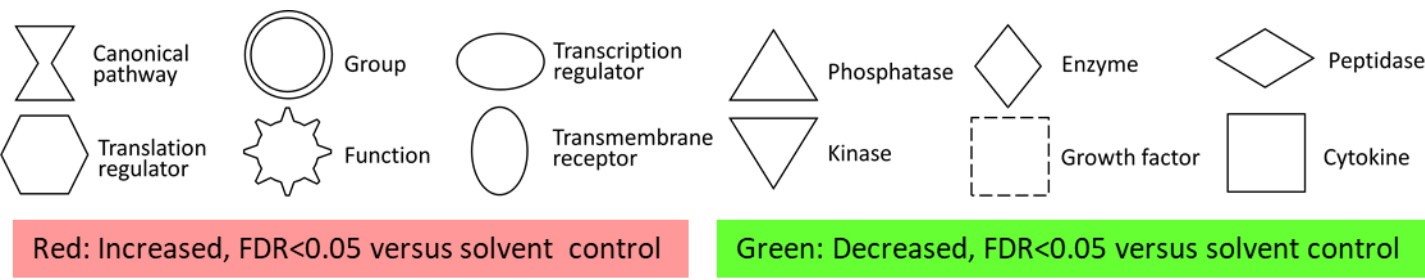



| Symbol        | Synonym(s)                                                                                                                                                                                                                                                                                                                          |
|---------------|-------------------------------------------------------------------------------------------------------------------------------------------------------------------------------------------------------------------------------------------------------------------------------------------------------------------------------------|
| 14-3-3        | CBP                                                                                                                                                                                                                                                                                                                                 |
| AJUBA         | ajuba LIM protein, JUB                                                                                                                                                                                                                                                                                                              |
| AMOT          | Angiomotin, CAG-2, D0Kis, D0Kist1, RGD1564027, S, Sll6                                                                                                                                                                                                                                                                              |
| CD44          | 216062 AT, AU023126, AW121933, AW146109, CD44A, CD44 Antigen, CD44 (containing exon 5), Cd44i, CD44 molecule (Indian blood group), CD44 (soluble), CD44 STANDARD FROM, CDW44, CSPG8, ECMR-III, Epican, HCELL, HERM, HERMES, Hermes antigen, HUTCH-I, IN, LHR, Ly-2, Ly-24, MC56, MDU2, MDU3, METAA, MIC4, NKT.44, Pgp, Pgp-1, RHAMM |
| CK1ε/CK1δ     | CK1 epsilon/CK1 delta, CK1εpsilondelta, CK1εδ                                                                                                                                                                                                                                                                                       |
| CRB1          | 7530426H14Rik, A930008G09Rik, CRB1-A, CRB1-A2, CRB1-B, CRB1-C, crumbs cell polarity complex component 1, crumbs family member 1, photoreceptor morphogenesis associated, LCA8, RP12                                                                                                                                                 |
| FAT4          | 6030410K14Rik, 9430004M15, CDHF14, CDHR11, FAT atypical cadherin 4, FAT-J, HKLLS2, NBLA00548, VMLDS2                                                                                                                                                                                                                                |
| FRMD6         | 2610019M19Rik, 4930488L10Rik, AW212977, c14 5320, C14orf31, EX, EX1, FERM domain containing 6, LOC257646, Willin                                                                                                                                                                                                                    |
| ITCH          | 6720481N21Rik, 8030492O04RIK, A, A130065M08, ADMFD, AIF4, AIP4, C230047C07RIK, Itchy E3 ubiquitin protein ligase, itchy, E3 ubiquitin protein ligase, NAPP1, Ubiquitin-Protein Ligase                                                                                                                                               |
| LATS          | LATS1/2, LATS 1 and 2                                                                                                                                                                                                                                                                                                               |
| Mob1a         | 4022402H07Rik, C2orf6, hMOB1, LOC100366014, MATS1, MOB1, MOB4B, Mobk1, MOBKB1B, MOB kinase activator 1A, Mobkl, MOBKL1B                                                                                                                                                                                                             |
| MST/KRS       | hpo, Mst, MST1/2                                                                                                                                                                                                                                                                                                                    |
| NF2           | ACN, BANF, me, Merlin, neurofibromatosis 2 tumor suppressor, neurofibromatosis 2 tumour suppressor, neurofibromin 2, SCH, schw, SCHWANNOMIN                                                                                                                                                                                         |
| PARD3         | AA960621, A1256638, ASIP, atypical pkc-specific binding, Baz, D8Ert580, D8Ert580e, MPAR3, P, PA, PAR3, PAR3A, PAR3alpha, par-3 family cell polarity regulator, PARD3A, Phip, PPP1R118, SE2-5, SE2-5L16, SE2-5LT1, SE2-5T2                                                                                                           |
| PATJ          | C, CIPP, hINADL, I, INADL, Inadl2, InaD-like, PATJ crumbs cell polarity complex component, PATJ, crumbs cell polarity complex component, RGD1564282, RGD1565362                                                                                                                                                                     |
| Pi            | 14265-44-2, inorganic phosphate, O4P-3, P, phosphate, phosphate(3-), phosphate ion, Pi                                                                                                                                                                                                                                              |
| PP1           | any Pp1 (protein phosphatase 1 complex), Atp-Mg2+-Dependent Protein Phosphatase, PP1, Pp1 (protein phosphatase 1 complex), PPA1, Protein Phosphatase 1                                                                                                                                                                              |
| PP2A          | protein PHOSPHATASE 2A, Protein Phosphatase Type2a                                                                                                                                                                                                                                                                                  |
| RASSF1A       | 123F2, AA536941, AU044980, D4Mgi37, NO, NORE2A, Ra, Ras, Ras association domain family member 1, Ras association (RalGDS/AF-6) domain family member 1, Rassf1A, Rassf1B, Rassf1C, RDA, RDA32, REH3P, REH3P21                                                                                                                        |
| RASSF6        | 1600016B17Rik, Ras association domain family member 6, Ras association (RalGDS/AF-6) domain family member 6                                                                                                                                                                                                                         |
| SAV1          | 1700040G09Rik, Salv, salvador family WW domain containing 1, salvador family WW domain containing protein 1, SAV, WW45, Wwp3, WWP4                                                                                                                                                                                                  |
| ScfTrcpbeta   | SCFbeta TRCP, Scf Trcp β, SCFβ TRCP                                                                                                                                                                                                                                                                                                 |
| SCRIB         | A1118201, Cr, CRC, CRIB, CRIB1, KIAA0147, mKIAA0147, RGD1565055, Scr, SCRIB1, SCRIB1, scribbled planar cell polarity, scribble planar cell polarity, scribble planar cell polarity protein, Vartul                                                                                                                                  |
| Smad2/3-Smad4 | Smad 2/3/4                                                                                                                                                                                                                                                                                                                          |
| SMAD4         | AW743858, D18Wsu70, D18Wsu70e, DPC, DPC4, JIP, Madh, MADH4, MYHRS, SMAD family member 4, Smaug1                                                                                                                                                                                                                                     |
| TEAD          | TEA domain family                                                                                                                                                                                                                                                                                                                   |
| TJP2          | C9DUPq21.11, DFNA51, DUP9q21.11, PFIC4, tight junction protein 2, X104, ZO-, ZO-2                                                                                                                                                                                                                                                   |
| TP53BP2       | 53BP, 53BP2, A, A1746547, ASPP2, p53-Binding, P53BP2, PPP1R13A, transformation related protein 53 binding protein 2, Trp53bp2, tumor protein p53 binding protein 2, tumor protein p53 binding protein, 2, tumour protein p53 binding protein 2, tumour protein p53 binding protein, 2, X98550                                       |
| WWC1          | AA408228, AU017197, BC037006, HBEBP3, HBEBP36, Ki, KIAA0869, KIBRA, MEMRYQTL, PPP1R168, RGD1308329, WW and C2 domain containing 1, WW, C2 and coiled-coil domain containing 1                                                                                                                                                       |
| Wwtr1         | 2310058J06Rik, 2610021I22Rik, C78399, DKFZp586I1419, TA, TAZ, TRANSCRIPTIONAL COACTIVATOR with PDZ-binding MOTIF, WW domain containing transcription regulator 1                                                                                                                                                                    |
| YAP/TAZ       | YAP/WWTR1, YAP/WWTRT1                                                                                                                                                                                                                                                                                                               |
| YAP1          | A1325207, COB1, Y, YAP, Yap2, YAP65, Yes1 associated transcriptional regulator, yes-associated protein 1, Yk, YKl, yor, Yorkie                                                                                                                                                                                                      |

# Pathway Analysis Using IPA Software; canonical pathway

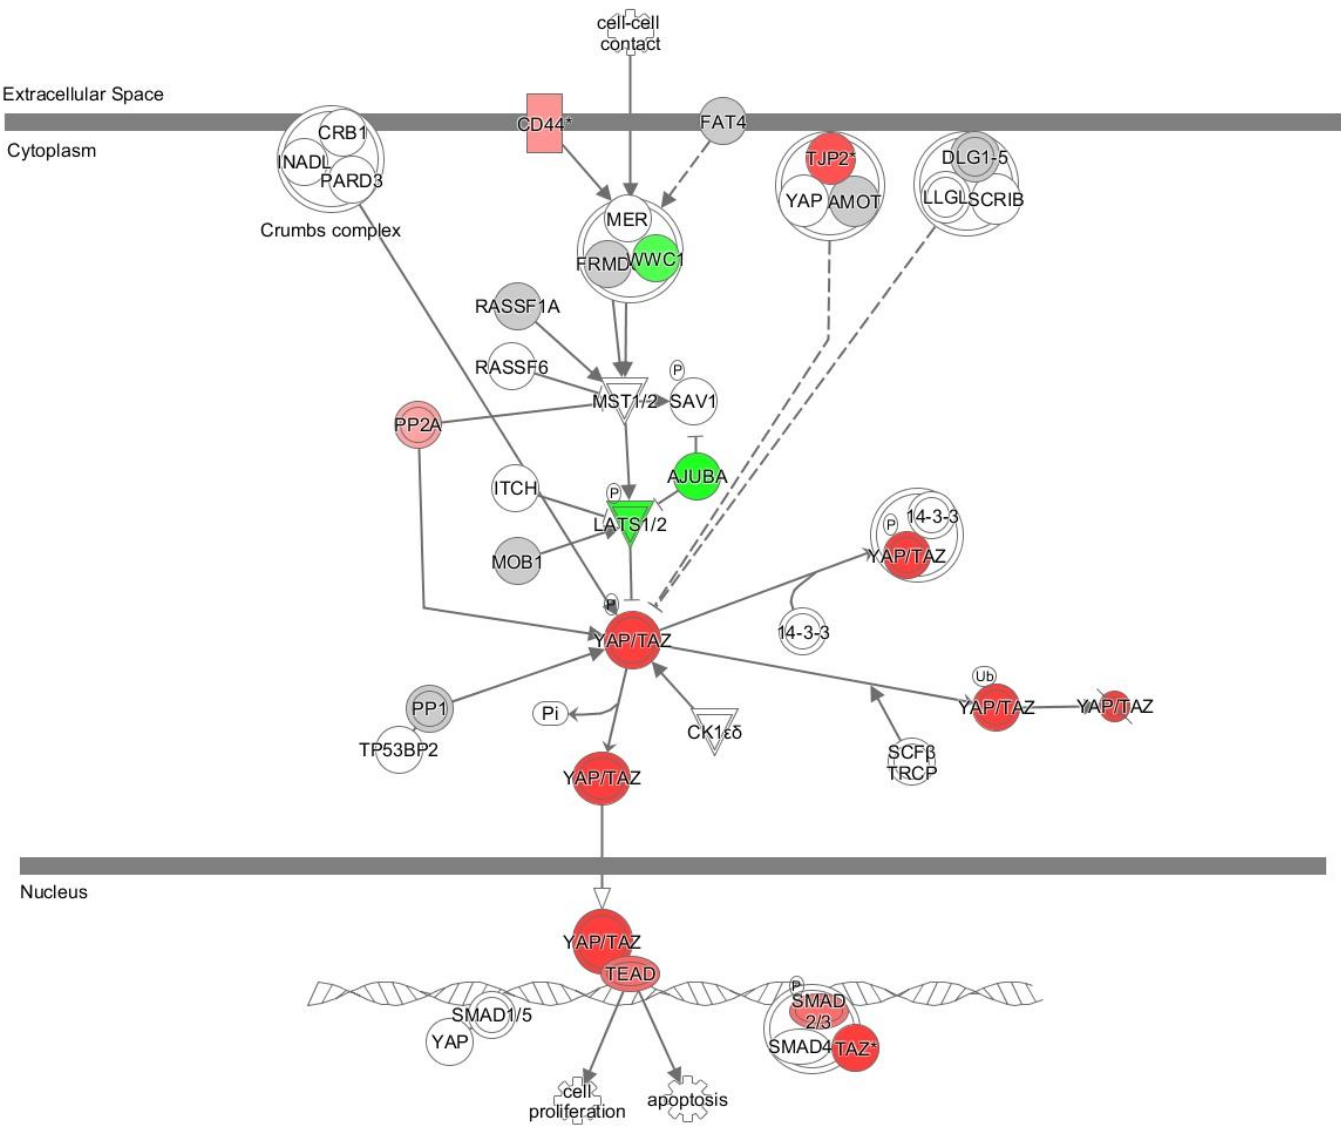

Figure S36. HIPPO Signaling at 6 h

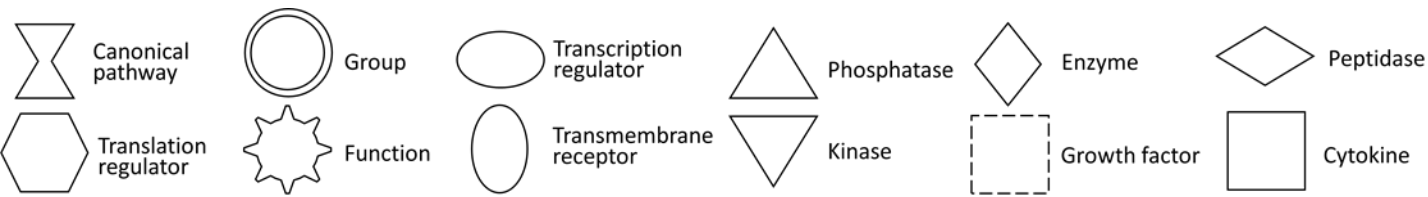

Red: Increased, FDR<0.05 versus solvent control

Green: Decreased, FDR<0.05 versus solvent control

| Symbol        | Synonym(s)                                                                                                                                                                                                                                                                                                                          |
|---------------|-------------------------------------------------------------------------------------------------------------------------------------------------------------------------------------------------------------------------------------------------------------------------------------------------------------------------------------|
| 14-3-3        | CBP                                                                                                                                                                                                                                                                                                                                 |
| AJUBA         | ajuba LIM protein, JUB                                                                                                                                                                                                                                                                                                              |
| AMOT          | Angiomotin, CAG-2, D0Kis, D0Kist1, RGD1564027, S, Sll6                                                                                                                                                                                                                                                                              |
| CD44          | 216062 AT, AU023126, AW121933, AW146109, CD44A, CD44 Antigen, CD44 (containing exon 5), Cd44i, CD44 molecule (Indian blood group), CD44 (soluble), CD44 STANDARD FROM, CDW44, CSPG8, ECMR-III, Epican, HCELL, HERM, HERMES, Hermes antigen, HUTCH-I, IN, LHR, Ly-2, Ly-24, MC56, MDU2, MDU3, META4, MIC4, NKT.44, Pgp, Pgp-1, RHAMM |
| CK1ε/CK1δ     | CK1 epsilon/CK1 delta, CK1epsilondelta, CK1εδ                                                                                                                                                                                                                                                                                       |
| CRB1          | 7530426H14Rik, A930008G09Rik, CRB1-A, CRB1-A2, CRB1-B, CRB1-C, crumbs cell polarity complex component 1, crumbs family member 1, photoreceptor morphogenesis associated, LCA8, RP12                                                                                                                                                 |
| FAT4          | 6030410K14Rik, 9430004M15, CDHF14, CDHR11, FAT atypical cadherin 4, FAT-J, HKLLS2, NBLA00548, VMLDS2                                                                                                                                                                                                                                |
| FRMD6         | 2610019M19Rik, 4930488L10RIK, AW212977, c14 5320, C14orf31, EX, EX1, FERM domain containing 6, LOC257646, Willin                                                                                                                                                                                                                    |
| ITCH          | 6720481N21Rik, 8030492O04RIK, A, A130065M08, ADMFD, AIF4, AIP4, C230047C07RIK, itchy E3 ubiquitin protein ligase, itchy, E3 ubiquitin protein ligase, NAPP1, Ubiquitin-Protein Ligase                                                                                                                                               |
| LATS          | LATS1/2, LATS 1 and 2                                                                                                                                                                                                                                                                                                               |
| Mob1a         | 4022402H07Rik, C2orf6, hMOB1, LOC100366014, MATS1, MOB1, MOB4B, Mobk1, MOBK1B, MOB kinase activator 1A, Mobkl, MOBKL1B                                                                                                                                                                                                              |
| MST/KRS       | hpo, Mst, MST1/2                                                                                                                                                                                                                                                                                                                    |
| NF2           | ACN, BANF, me, Merlin, neurofibromatosis 2 tumor suppressor, neurofibromatosis 2 tumour suppressor, neurofibromin 2, SCH, schw, SCHWANNOMIN                                                                                                                                                                                         |
| PAR3          | AA960621, AI256638, ASIP, atypical pkc-specific binding, Baz, D8ErtD580, D8ErtD580e, MPAR3, P, PA, PAR3, PAR3A, PAR3alpha, par-3 family cell polarity regulator, PARD3A, Phip, PPP1R118, SE2-5, SE2-5L16, SE2-5LT1, SE2-5T2                                                                                                         |
| PATJ          | C, CIPP, hINADL, I, INADL, Inadl2, Inad-like, PATJ crumbs cell polarity complex component, PATJ, crumbs cell polarity complex component, RGD1564282, RGD1565362                                                                                                                                                                     |
| Pi            | 14265-44-2, inorganic phosphate, O4P-3, P, phosphate, phosphate(3-), phosphate ion, Pi                                                                                                                                                                                                                                              |
| PP1           | any Pp1 (protein phosphatase 1 complex), Atp-Mg2+-Dependent Protein Phosphatase, PP1, Pp1 (protein phosphatase 1 complex), PPA1, Protein Phosphatase 1                                                                                                                                                                              |
| PP2A          | protein PHOSPHATASE 2A, Protein Phosphatase Type2a                                                                                                                                                                                                                                                                                  |
| RASSF1A       | 123F2, AA536941, AU044980, D4Mgi37, NO, NORE2A, Ra, Ras, Ras association domain family member 1, Ras association (RalGDS/AF-6) domain family member 1, Rassf1A, Rassf1B, Rassf1C, RDA, RDA32, REH3P, REH3P21                                                                                                                        |
| RASSF6        | 1600016B17Rik, Ras association domain family member 6, Ras association (RalGDS/AF-6) domain family member 6                                                                                                                                                                                                                         |
| SAV1          | 1700040G09Rik, Salv, salvador family WW domain containing 1, salvador family WW domain containing protein 1, SAV, WW45, Wwp3, WWP4                                                                                                                                                                                                  |
| ScfTrcpbeta   | SCFbeta TRCP, Scf Trcp β, SCFβ TRCP                                                                                                                                                                                                                                                                                                 |
| SCRIB         | AI118201, Cr, CRC, CRIB, CRIB1, KIAA0147, mKIAA0147, RGD1565055, Scr, SCRIB1, SCRIB1, scribbled planar cell polarity, scribble planar cell polarity, scribble planar cell polarity protein, Vartul                                                                                                                                  |
| Smad2/3-Smad4 | Smad 2/3/4                                                                                                                                                                                                                                                                                                                          |
| SMAD4         | AW743858, D18Wsu70, D18Wsu70e, DPC, DPC4, JIP, Madh, MADH4, MYHRS, SMAD family member 4, Smaug1                                                                                                                                                                                                                                     |
| TEAD          | TEA domain family                                                                                                                                                                                                                                                                                                                   |
| TJP2          | C9DUPq21.11, DFNA51, DUP9q21.11, PFIC4, tight junction protein 2, X104, ZO-, ZO-2                                                                                                                                                                                                                                                   |
| TP53BP2       | 53BP, 53BP2, A, AI746547, ASPP2, p53-Binding, P53BP2, PPP1R13A, transformation related protein 53 binding protein 2, Trp53bp2, tumor protein p53 binding protein 2, tumor protein p53 binding protein, 2, tumour protein p53 binding protein 2, tumour protein p53 binding protein, 2, X98550                                       |
| WWC1          | AA408228, AU017197, BC037006, HBEBP3, HBEBP36, Ki, KIAA0869, KIBRA, MEMRYQTL, PPP1R168, RGD1308329, WW and C2 domain containing 1, WW, C2 and coiled-coil domain containing 1                                                                                                                                                       |
| Wwtr1         | 2310058J06Rik, 2610021I22Rik, C78399, DKFZp586I1419, TA, TAZ, TRANSCRIPTIONAL COACTIVATOR with PDZ-binding MOTIF, WW domain containing transcription regulator 1                                                                                                                                                                    |
| YAP/TAZ       | YAP/WWTR1, YAP/WWTR1                                                                                                                                                                                                                                                                                                                |
| YAP1          | AI325207, COB1, Y, YAP, Yap2, YAP65, Yes1 associated transcriptional regulator, yes-associated protein 1, Yk, YKl, yor, Yorkie                                                                                                                                                                                                      |

Pathway Analysis Using IPA Software; canonical pathway

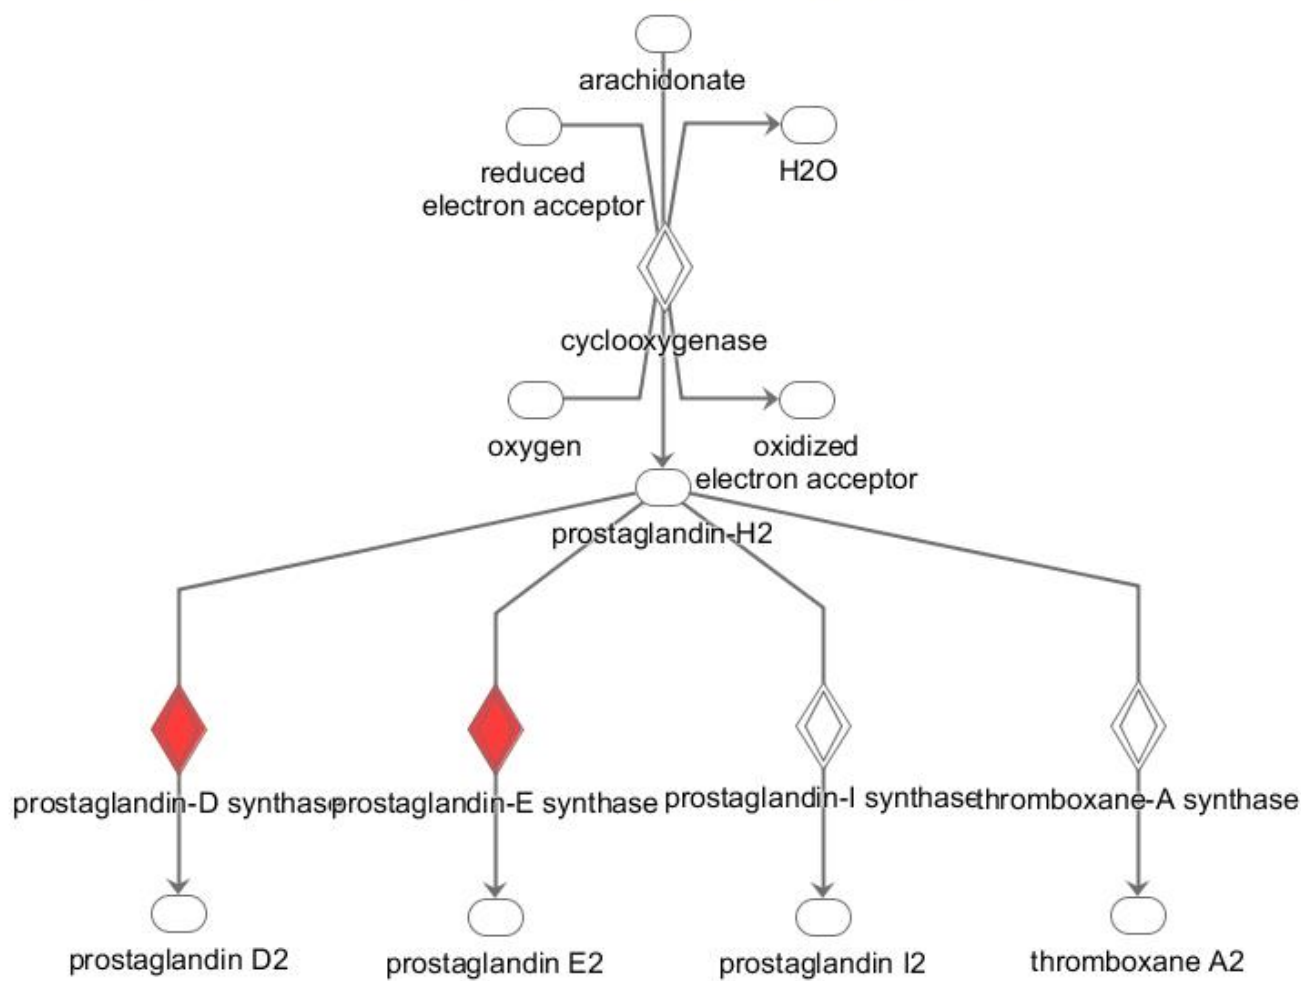

Figure S37. Prostanoid Biosynthesis at 6 h

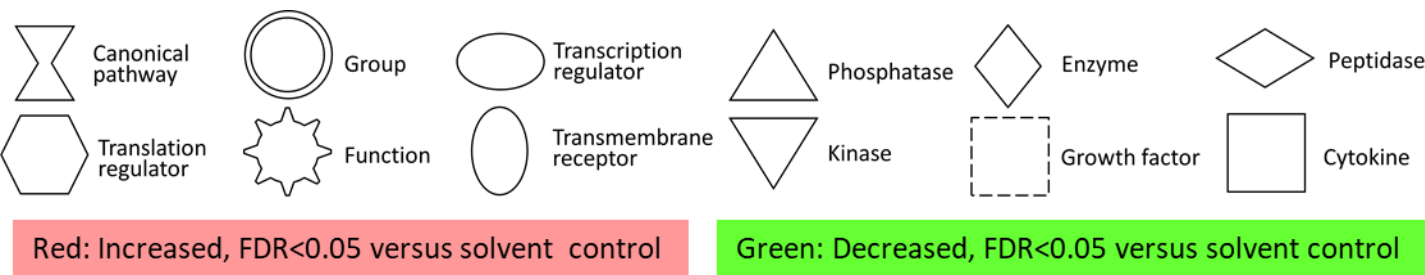

| Symbol                   | Synonym(s)                                                                                                                                                                                                                                                                                                                                                                                                                                                      |
|--------------------------|-----------------------------------------------------------------------------------------------------------------------------------------------------------------------------------------------------------------------------------------------------------------------------------------------------------------------------------------------------------------------------------------------------------------------------------------------------------------|
| arachidonate             | 20:4n-6, 506-32-1, 5,8,11,14-eicosatetraenoic acid, (all-Z)-, 5Z,8Z,11Z,14Z-arachidonic acid, (5Z,8Z,11Z,14Z)-icosa-5,8,11,14-tetraenoic acid, AA, AA-d8, ARA, arachidonate, C20:4(n-6), C20:4w6, C20H32O2, eicosa-5Z,8Z,11Z,14Z-tetraenoic acid, sodium arachidonate                                                                                                                                                                                           |
| cyclooxygenase           | 1.14.99.1, (5Z,8Z,11Z,14Z)-icosa-5,8,11,14-tetraenoate,hydrogen-donor:oxygen oxidoreductase, COX, COX1/2, fatty acid cyclooxygenase, PGHS, (PG)H synthase, PG synthetase, Prostaglandin-endoperoxide synthase, prostaglandin endoperoxide synthetase, prostaglandin G/H synthase, prostaglandin G/H synthase and cyclooxygenase, Prostaglandin h synthase, Prostaglandin Peroxidase, prostaglandin synthase, prostaglandin synthetase, PTGS, PTGS1/2            |
| prostaglandin D2         | 11-dehydroprostaglandin F2-alpha, 11-dehydroprostaglandin F2-α, 41598-07-6, (5Z,13E)-9alpha-hydroxy-11,15-dioxoprost-5,13-dienoate, (5Z,13E)-9alpha-hydroxy-11,15-dioxoprost-5,13-dienoic acid, C20H32O5, PGD2, prost-5,13-dien-1-oic acid, 9,15-dihydroxy-11-oxo-, (5Z,9-alpha,13E,15S)-, prost-5,13-dien-1-oic acid, 9,15-dihydroxy-11-oxo-, (5Z,9-α,13E,15S)-, (Z)-7-[(1R,2R,5S)-5-hydroxy-2-[(E,3S)-3-hydroxyoct-1-enyl]-3-oxocyclopentyl]hept-5-enoic acid |
| prostaglandin E2         | 363-24-6, (5Z, 11a, 13E, 15S)-11, 15-Dihydroxy-9-oxo-prosta-5, 13-dien-1-oic acid, C20H32O5, Cervidil, dinoprostone, PGE2, Prepidil, Propess, Prostarmon E, Prostin E, Prostin E2, Prostin E2 Vaginal Suppository, (Z)-7-[(1R,2R,3R)-3-hydroxy-2-[(E,3S)-3-hydroxyoct-1-enyl]-5-oxocyclopentyl]hept-5-enoic acid                                                                                                                                                |
| prostaglandin I2         | 35121-78-9, (5Z)-5-[(3aR,4R,5R,6aS)-5-hydroxy-4-[(E,3S)-3-hydroxyoct-1-enyl]-3,3a,4,5,6,6a-hexahydrocyclopenta[b]furan-2-ylidene]pentanoic acid, 61849-14-7, C20H32O5, epoprostenol sodium, Flolan, PGI2, PGX, prost-5,13-dien-1-oic acid, 6,9-epoxy-11,15-dihydroxy-, (5Z,9alpha,11alpha,13E,15S)-, prostacyclin, prostaglandin I, prostaglandin I2, sodium PGI2                                                                                               |
| prostaglandin-D synthase | (5,13)-(15S)-9alpha,11alpha-epidioxy-15-hydroxyprost-5,13-dienoate D-isomerase, 5.3.99.2, PGH-PGD isomerase, prostaglandin-H2 D-isomerase, prostaglandin-R-prostaglandin D isomerase                                                                                                                                                                                                                                                                            |
| prostaglandin-E synthase | 5.3.99.3, (5Z,13E)-(15S)-9alpha,11alpha-epidioxy-15-hydroxyprost-5,13-dienoate E-isomerase, endoperoxide isomerase, PGE2 isomerase, PGE isomerase, PGH-PGE isomerase, prostaglandin endoperoxide E2 isomerase, prostaglandin endoperoxide E isomerase, prostaglandin-H2 E-isomerase, prostaglandin H-E isomerase, prostaglandin R-prostaglandin E isomerase                                                                                                     |
| prostaglandin-H2         | 42935-17-1, 9,11-epoxymethano-PGH2, C20H32O5, PGH2, PGH2 endoperoxide, prost-5,13-dien-1-oic acid, 9,11-epidioxy-15-hydroxy-, (5Z,9alpha,11alpha,13E,15S)-, (Z)-7-[(1R,4S,5R,6R)-6-[(E,3S)-3-hydroxyoct-1-enyl]-2,3-dioxabicyclo[2.2.1]heptan-5-yl]hept-5-enoic acid                                                                                                                                                                                            |
| prostaglandin-synthase   | 5.3.99.4, (5Z,13E)-(15S)-9alpha,11alpha-epidioxy-15-hydroxyprost-5,13-dienoate 6-isomerase, PGI2 synthase, PGI2 synthetase, prostacycline synthetase, prostacyclin synthase, prostagladin I2 synthetase                                                                                                                                                                                                                                                         |
| thromboxane A2           | 57576-52-0, 5-heptenoic acid, 7-(3-(3-hydroxy-1-octenyl)-2,6-dioxabicyclo[3.1.1]hept-4-yl)-, (1S-(1alpha,3alpha,3R*),4beta(Z,5alpha)-, C20H32O5, thromboxa-5,13-dien-1-oic acid, 9,11-epoxy-15-hydroxy-, (5Z,9alpha,11alpha,13E,15S)-, TxA2, (Z)-7-[(1S,3R,4S,5S)-3-[(E,3S)-3-hydroxyoct-1-enyl]-2,6-dioxabicyclo[3.1.1]heptan-4-yl]hept-5-enoic acid                                                                                                           |
| thromboxane-A synthase   | 5.3.99.5, (5Z,13E)-(15S)-9alpha,11alpha-epidioxy-15-hydroxyprost-5,13-dienoate thromboxane-A2-isomerase, thromboxane synthase                                                                                                                                                                                                                                                                                                                                   |

# Pathway Analysis Using IPA Software; canonical pathway

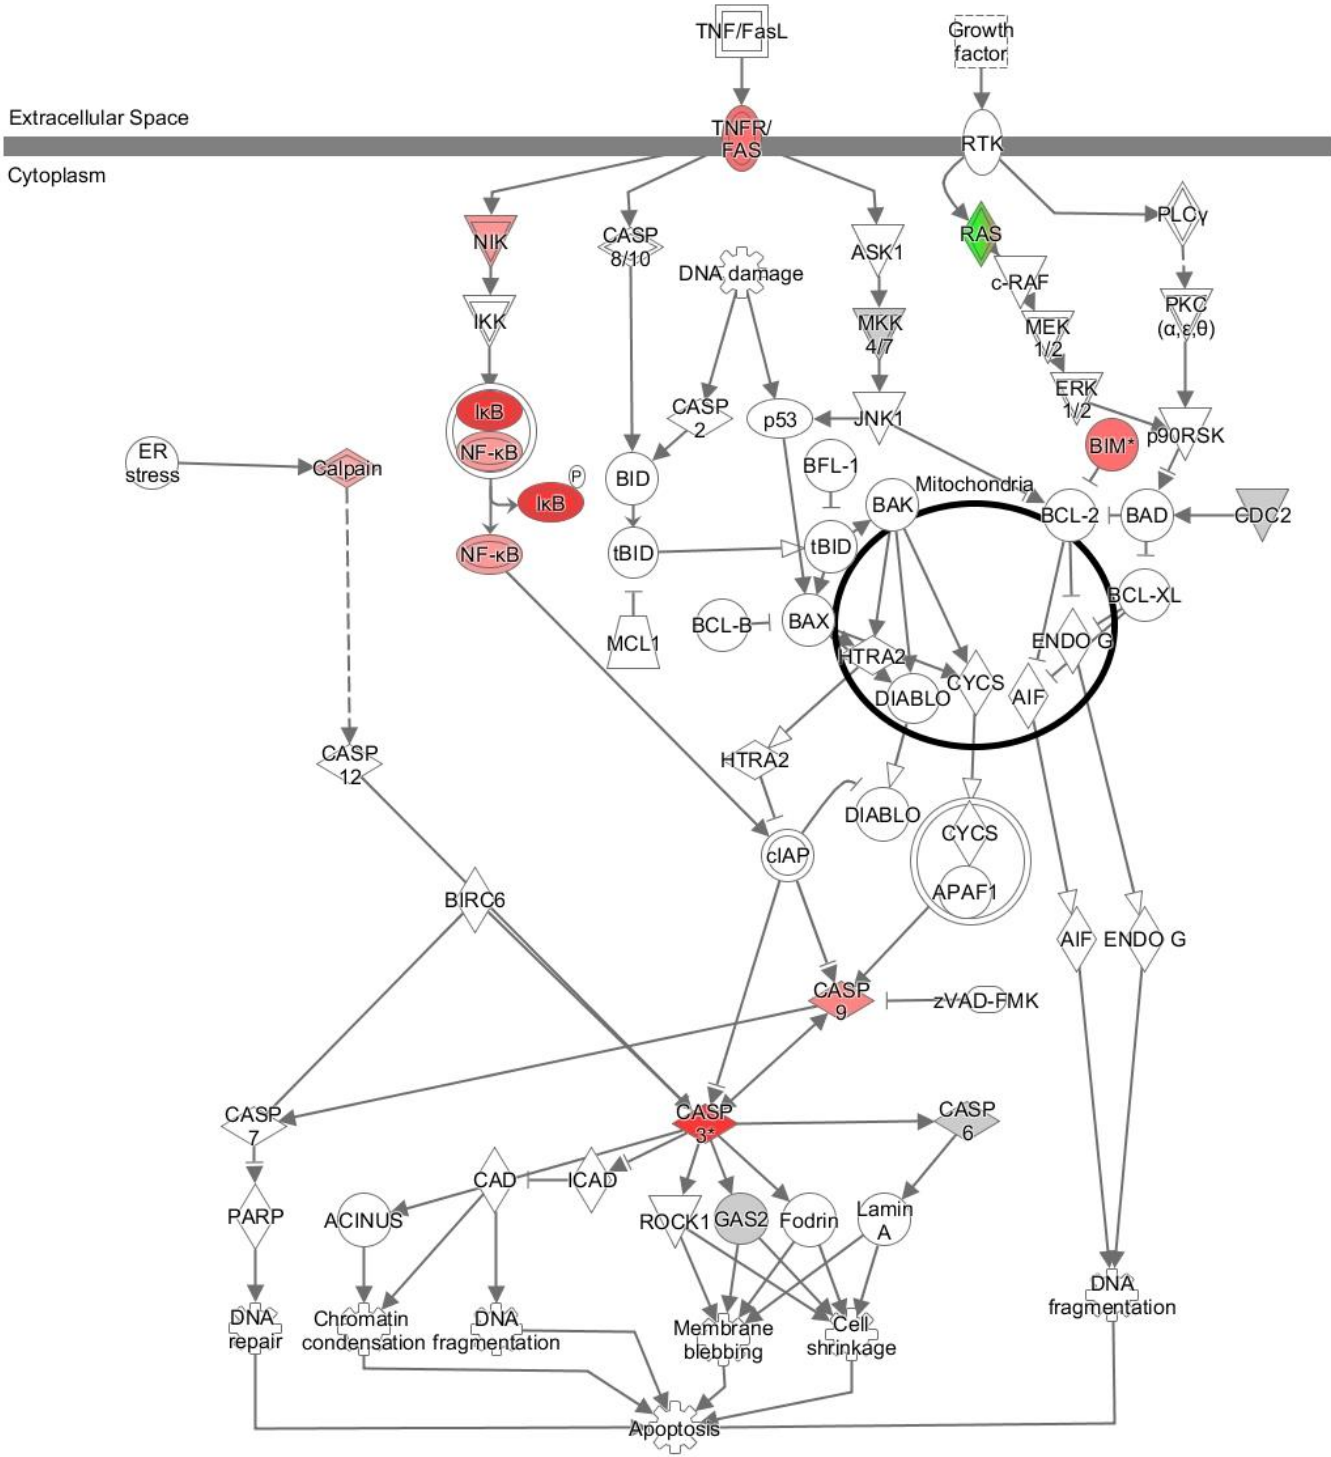

Figure S38. Apoptosis Signaling at 6 h

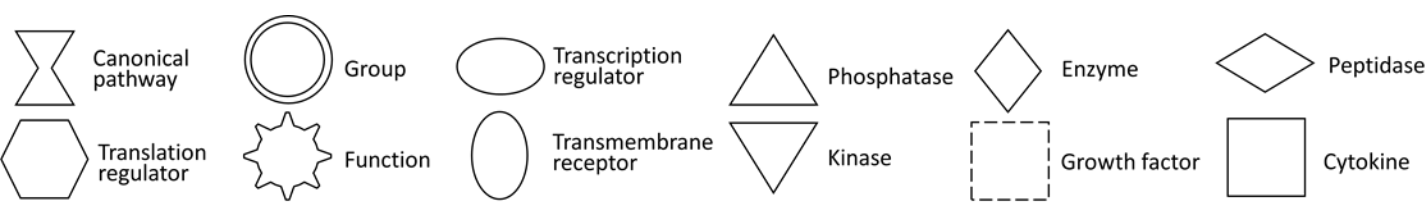

Red: Increased, FDR<0.05 versus solvent control

Green: Decreased, FDR<0.05 versus solvent control

| Symbol      | Synonym(s)                                                                                                                                                                                                                                                                                                                                                                                                                                                             |
|-------------|------------------------------------------------------------------------------------------------------------------------------------------------------------------------------------------------------------------------------------------------------------------------------------------------------------------------------------------------------------------------------------------------------------------------------------------------------------------------|
| ACIN1       | 2610036191Rik, 2610510L13Rik, Ac, ACINUS, ACINUS-1, acinusL, acinusS, ACN, apoptotic chromatin condensation inducer 1, Apoptotic Chromatin Condensation Inducer In The Nucleus, C79325, fSAP152, mKIAA0670                                                                                                                                                                                                                                                             |
| AIFM1       | A, AIF, apoptosis inducing factor mitochondria associated 1, apoptosis inducing factor, mitochondria associated 1, apoptosis-inducing factor, mitochondrion-associated 1, AUNX1, CMT2D, CMTX4, COWCK, COXPd6, DFNX5, Hq, NADMR, NAMSD, Pdcd, PDCD8, SEMDHL                                                                                                                                                                                                             |
| APAF1       | 6230400I06RIK, Ap, Apaf1I, apoptotic peptidase activating factor 1, CED4, fog, mKIAA0413                                                                                                                                                                                                                                                                                                                                                                               |
| Apaf1-Cycs  | Apaf1-CytoC, Cyt C-APAF1, CytochromeC-APAF1                                                                                                                                                                                                                                                                                                                                                                                                                            |
| BAD         | A1325008, Bad v1, Bad v2, BBC2, BCL2-associated agonist of cell death, BCL2L8                                                                                                                                                                                                                                                                                                                                                                                          |
| BAK1        | Ba, BAK, BAK-LIKE, BCL2-antagonist/killer 1, BCL2L7, CDN1, N-B, N-BAK1                                                                                                                                                                                                                                                                                                                                                                                                 |
| BAX         | Bcl2-associated X, BCL2 associated X, apoptosis regulator, BCL2-associated X protein, BCL2L4                                                                                                                                                                                                                                                                                                                                                                           |
| BCL-XL      | bBclxl, Bcl, BCL2L, BCL2-like 1, BCLX, Bcl-X beta, Bclx gamma, BCL-XL/S, Bcl-Xβ, Bclx γ, PPP1R52                                                                                                                                                                                                                                                                                                                                                                       |
| BCL2        | AW986256, B cell leukaemia/lymphoma 2, B cell leukemia/lymphoma 2, Bcl-, Bcl2 alpha, BCL2 apoptosis regulator, BCL2, apoptosis regulator, Bcl2 α, C430015F12Rik, D630044D05RIK, D830018M01RIK, LOC100046608, ORF16, PPP1R50                                                                                                                                                                                                                                            |
| BCL2A1      | A, A1-, A1-b, A1-d, ACC-1, ACC-2, BB218357, B cell leukaemia/lymphoma 2 related protein A1a, B cell leukaemia/lymphoma 2 related protein A1b, B cell leukaemia/lymphoma 2 related protein A1d, B cell leukemia/lymphoma 2 related protein A1a, B cell leukemia/lymphoma 2 related protein A1b, B cell leukemia/lymphoma 2 related protein A1d, Bcl2, BCL2A1A, Bcl2a1b, BCL2A1D, BCL2L5, BCL2-related protein A1, Bfl-, Bfl-1, BFL1/A1, GRS, Hbp, HBPA1, U23778, U23781 |
| BCL2L10     | AA420380, AU023065, B, BCL2 like 10, BCL-B, Boo, C85687, D, Diva                                                                                                                                                                                                                                                                                                                                                                                                       |
| BCL2L11     | 1500006F24RIK, BAM, BCL2 like 11, BCL2-like 11 (apoptosis facilitator), Bi, BIM, Bo, BOD, BODL, LOC150819                                                                                                                                                                                                                                                                                                                                                              |
| BiD         | 2700049M22RIK, A1875481, AU022477, BH3 interacting domain death agonist, cBid, FP497                                                                                                                                                                                                                                                                                                                                                                                   |
| BIRC6       | A430032G04RIK, A430040A19RIK, AA501170, APOLLON, Baculoviral IAP repeat-containing 6, Bruc, BRUCE, D630005A10Rik, mKIAA1289, Ubiquitin-conjugating enzyme e2                                                                                                                                                                                                                                                                                                           |
| c-lap       | IAP, NAIP                                                                                                                                                                                                                                                                                                                                                                                                                                                              |
| Calpain     | CALCIUM DEPENDENT PROTEASE, M calpain                                                                                                                                                                                                                                                                                                                                                                                                                                  |
| CASP12      | CASP12P1, CASPASE12, caspase 12 (gene/pseudogene)                                                                                                                                                                                                                                                                                                                                                                                                                      |
| CASP2       | Casp, caspase 2, Ich-, ICH-1, Nedd, NEDD-2, PPP1R57                                                                                                                                                                                                                                                                                                                                                                                                                    |
| CASP3       | A830040C14RIK, AC-, AC-3, Casp, Caspase-3, CASPASE-3 p20, CC3, CPP4, CPP-32, CPP32B, CPP32-beta, CPP32-β, Ice-like cysteine protease, Lice, mld, mldy, SCA-1, Ya, YAMA                                                                                                                                                                                                                                                                                                 |
| CASP6       | caspase 6, LOC103689977, mCAS, MCH2                                                                                                                                                                                                                                                                                                                                                                                                                                    |
| CASP7       | A1314680, casp, Caspase-7, CMH-1, ICE-, ICE-IAP3, ICE-LAP3, LICE2, Lice2 cysteine protease, mCASP-7, MCH3                                                                                                                                                                                                                                                                                                                                                              |
| CASP9       | A1115399, APAF-3, AW493809, Casp, Casp9 v1, Caspase-9, ICE-, ICE-LAP6, MCH6, PPP1R56                                                                                                                                                                                                                                                                                                                                                                                   |
| Caspase8/10 | Casp8/10, Caspase 8,10                                                                                                                                                                                                                                                                                                                                                                                                                                                 |
| CDK1        | CDC2, CDC28A, Cdc2a, CDC2 kinase, cyclin-dependent kinase 1, GROWTH-ASSOCIATED HISTONE H1 KINASE, p34, P34CDC2                                                                                                                                                                                                                                                                                                                                                         |
| CYCS        | CYC, CYCSA, CYTC, CYTOC, CYTOCHROME C, cytochrome c, somatic, cytochrome c, somatic-like, ENSMUSG00000058927, HCS, LOC100363502, THC4, X laevis XLCL2                                                                                                                                                                                                                                                                                                                  |
| DFFA        | A330085O09RIK, DFF1, DFF35, DFF-45, DNA fragmentation factor, alpha subunit, DNA fragmentation factor subunit alpha, DNA fragmentation factor subunit α, DNA fragmentation factor, α subunit, ICA, ICAD, ICAD-S                                                                                                                                                                                                                                                        |
| DFFB        | 5730477D02RIK, C, CA, CAD, caspase-activated DNase, CPAN, DFF2, DFF-40, Didf, Didff, DNA fragmentation factor, beta subunit, DNA fragmentation factor subunit beta, DNA fragmentation factor subunit β, DNA fragmentation factor, β subunit                                                                                                                                                                                                                            |
| DIABLO      | 0610041G12RIK, 1700006L01RIK, AU040403, DFNA64, diablo IAP-binding mitochondrial protein, diablo, IAP-binding mitochondrial protein, Sm, SMAC                                                                                                                                                                                                                                                                                                                          |
| ENDOG       | ENDONUCLEASE G                                                                                                                                                                                                                                                                                                                                                                                                                                                         |
| ERK1/2      | MAPK p44/42, MAPK p44/p42, p42/44 mapk, P42/p44 erk, P42/p44 mapk, p42/p44 MAP KINASE                                                                                                                                                                                                                                                                                                                                                                                  |
| GAS2        | Gas, growth arrest-specific 2, RGD1563167                                                                                                                                                                                                                                                                                                                                                                                                                              |
| HTRA2       | A1481710, Htr, HtrA serine peptidase 2, MGCA8, mnd, mnd2, O, OMI, PARK13, Pr, PRSS25                                                                                                                                                                                                                                                                                                                                                                                   |
| Ikb         | I KAPPA B, Ikbeta, Iκβ, Iκ-B                                                                                                                                                                                                                                                                                                                                                                                                                                           |
| IKB-NfκB    | IkappaB-NFkappaB, IκB-NFκB, NFκB-IκB                                                                                                                                                                                                                                                                                                                                                                                                                                   |
| IKK         | I Kappa B Kinase, IKKALPHABETA, IKK Complex, I κ B Kinase                                                                                                                                                                                                                                                                                                                                                                                                              |
| LMNA        | CDCD1, CDDC, CMD1A, CMT2B1, Dhe, EMD2, FPL, FPLD, FPLD2, HGPS, IDC, lamin A, LAMIN A/C, LAMININ A/C, LDP1, LFP, LGMD1B, LMN1, LMNC, LMNL1, MADA, Prelamin-A/C, PRO1                                                                                                                                                                                                                                                                                                    |
| MAP2K1/2    | MEK1/2, MKK1/2                                                                                                                                                                                                                                                                                                                                                                                                                                                         |
| MAP2K4/7    | Jnkk, MEK 4/7, MKK 4/7                                                                                                                                                                                                                                                                                                                                                                                                                                                 |
| MAP3K5      | 7420452D20RIK, A, APOPTOSIS SIGNAL REGULATED KINASE 1, AS, ASK, ASK1, M3K5, MAPKKK5, MEKK5, mitogen-activated protein kinase kinase kinase 5, RGD1306565                                                                                                                                                                                                                                                                                                               |
| MAPK8       | A1849689, C-JUN N-TERMINAL KINASE1, JNK, JNK1, JNK1A2, JNK21B1/2, JNK-46, mitogen-activated protein kinase 8, p46JNK1, p46JNK1 alpha, p46JNK1 α, Prk, PRKM8, SAPK1, SAPK1c, Sapk gamma, SAPK P46, Sapk γ, STRESS-ACTIVATED protein KINASE-LIKE KINASE                                                                                                                                                                                                                  |
| MCL1        | AW556805, BCL2L3, EAT, Mcl-, MCL1 apoptosis regulator, BCL2 family member, mcl1/EAT, myeloid cell leukaemia sequence 1, myeloid cell leukemia sequence 1, TM                                                                                                                                                                                                                                                                                                           |
| NFKB        | NF-KAPPA B, NF-κ B, nuclear factor-κ b, transcription factor nuclear factor κ b                                                                                                                                                                                                                                                                                                                                                                                        |
| Parp1       | 5830444G22RIK, A, Adp, Adprp, Adprp1, ADPRT, ADPRT 1, A1893648, ARTD1, C80510, msPARP, pa, pADPRT-1, PARP, PARS, POLY(ADP-RIBOSE) POLYMERASE 1, poly (ADP-ribose) polymerase family, member 1, PPOL, sP, sPARP-1                                                                                                                                                                                                                                                       |
| PKC(α,ε,θ)  | PKC (alpha, epsilon, theta), PKC (α,ε,θ)                                                                                                                                                                                                                                                                                                                                                                                                                               |
| PLC-gamma   | Phospholipase C gamma, Phospholipase C γ, PLCG, PLCγ                                                                                                                                                                                                                                                                                                                                                                                                                   |
| RAF1        | 6430402F14RIK, AA990557, BB129353, CMD1NN, c-R, Cra, CRAF, Cra1, D830050J10Rik, leukaemia ONCOGENE HOMOLOG1, LEUKEMIA ONCOGENE HOMOLOG1, NS5, Raf-1 proto-oncogene, serine/threonine kinase, v-, v-Raf, v-raf-leukaemia viral oncogene 1, v-raf-leukemia viral oncogene 1                                                                                                                                                                                              |
| ROCK1       | 1110055K06RIK, LOC100129157, P160ROCK, p160 ROCK-1, Rho-associated coiled-coil containing protein kinase 1, Roc, ROCK, ROCK-I, ROK, ROK beta, ROK β                                                                                                                                                                                                                                                                                                                    |
| RPS6KA1     | HU-1, MAPKAPK1, MAPKAPK1A, MAPKAP kinase 1, MAPKAP Kinase 1 Alpha, MAPKAP Kinase 1 α, p90Rsk, p90-RSK 1, p90S6K, RIBOSOMAL protein S6 KINASE A, ribosomal protein S6 kinase A1, ribosomal protein S6 kinase polypeptide 1, Rs, RSK, RSK1, S6K-alpha-1, S6K-α-1                                                                                                                                                                                                         |
| SPTAN1      | 2610027H02RIK, A2a, Alpha fodrin, (alpha)II-SPECTRIN, Alphall spectrin, Alpha-spectrin, Alpha spectrin, alpha SPECTRIN 2, DEE5, EIEE5, Fodrin, IPF, NEAS, S, Sp, Spectrin alpha 2, spectrin alpha, non-erythrocytic 1, spectrin, alpha, non-erythrocytic 1, Spectrin α 2, spectrin α, non-erythrocytic 1, spectrin, α, non-erythrocytic 1, SPNA2, SPTA2, α fodrin, (α)II-SPECTRIN, α-spectrin, α spectrin, α SPECTRIN 2                                                |
| TP53        | bbl, BCC7, bly, bhy, BMF55, LFS1, p4, p44, p5, P53, P53 cellular tumour antigen, p53 tumor suppressor, transformation related protein 53, TRP53, tumor protein p53, tumour protein p53                                                                                                                                                                                                                                                                                 |
| zVAD-FMK    | benzyloxycarbonyl-VAD-fluoromethyl ketone, N-benzyloxycarbonyl-Val-Ala-Asp-fluoromethyl ketone, ZVAD, z-VAD.FMK                                                                                                                                                                                                                                                                                                                                                        |

Pathway Analysis Using IPA Software; canonical pathway

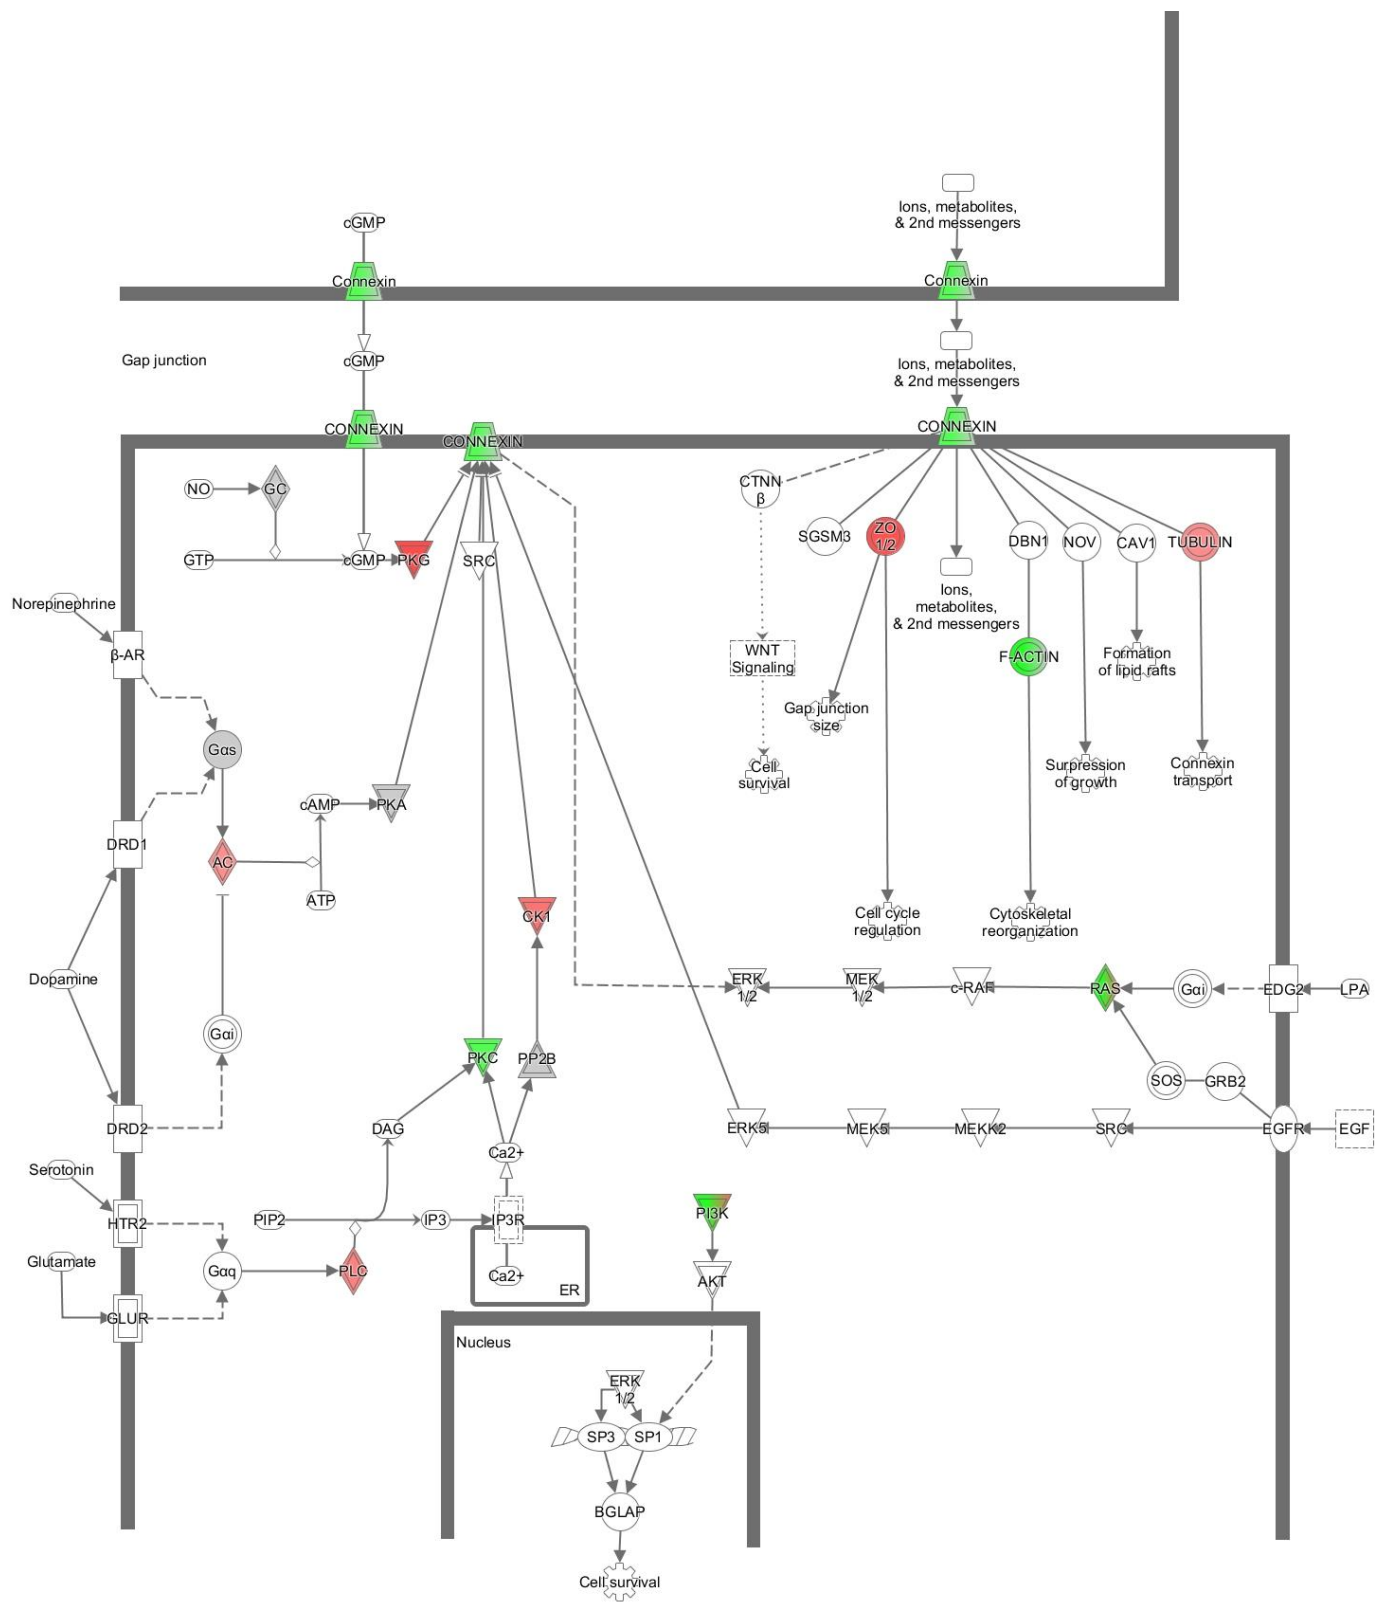

Figure S39. Gap Junction Signaling at 6 h

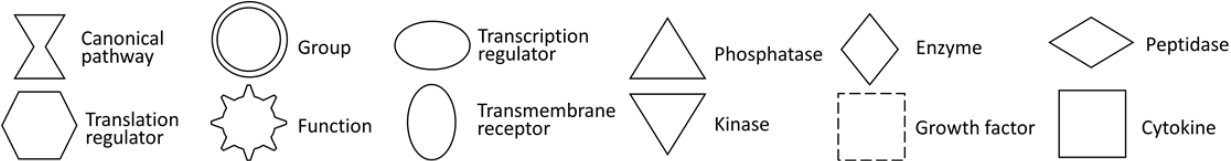

Red: Increased, FDR<0.05 versus solvent control

Green: Decreased, FDR<0.05 versus solvent control



| Symbol           | Synonym(s)                                                                                                                                                                                                                                                                                                                                                                                                                                                                                                                                                                                                                                                                                                                                                            |
|------------------|-----------------------------------------------------------------------------------------------------------------------------------------------------------------------------------------------------------------------------------------------------------------------------------------------------------------------------------------------------------------------------------------------------------------------------------------------------------------------------------------------------------------------------------------------------------------------------------------------------------------------------------------------------------------------------------------------------------------------------------------------------------------------|
| ADCY             | 3',5'-cyclic AMP synthetase, 4.6.1.1, AC, Adenylate Cyclase, Adenyl Cyclase, Adenylyl cyclase, ATP diphosphate-lyase (cyclizing), mAac, sAC                                                                                                                                                                                                                                                                                                                                                                                                                                                                                                                                                                                                                           |
| ADRB1            | Adrb, ADRB1R, ADR-beta1, Adrenergic Receptor Beta 1, adrenergic receptor, beta 1, Adrenergic Receptor $\beta$ 1, adrenergic receptor, $\beta$ 1, adrenoceptor beta 1, adrenoceptor $\beta$ 1, ADR- $\beta$ 1, B1AR, beta-1 adrenergic receptor, beta1-ADRENORECEPTOR, BETA1AR, beta2-AR, beta-AR, FNSS2, RATB1AR, RHR, $\beta$ 1-adrenergic receptor, $\beta$ 1-AR, $\beta$ 2-AR, $\beta$ -AR                                                                                                                                                                                                                                                                                                                                                                         |
| AKT              | AKT1/2/3, B/Akt, PKB, RAC-PK                                                                                                                                                                                                                                                                                                                                                                                                                                                                                                                                                                                                                                                                                                                                          |
| ATP              | [[[2R,3S,4R,5R)-5-(6-aminopurin-9-yl)-3,4-dihydroxyoxolan-2-yl]methoxy-hydroxyphosphoryl] phosphono hydrogen phosphate, 56-65-5, 9-beta-D-arabinofuranosyladenine 5'-triphosphate, 9- $\beta$ -D-arabinofuranosyladenine 5'-triphosphate, adenosine 5'-(tetrahydrogen triphosphate), adenosine 5'-triphosphate, ATP, ATP4-, C10H16N5O13P3                                                                                                                                                                                                                                                                                                                                                                                                                             |
| BGLAP            | A1461847, Bgl, Bgla, Bglap1, Bglap2, Bglap3, Bglap-rs1, BGP, BGP2, Bgpr, Bgpra, bone gamma-carboxyglutamate protein, bone gamma-carboxyglutamate protein 2, bone gamma-carboxyglutamate protein 3, Bone Gla-protein, bone $\gamma$ -carboxyglutamate protein, bone $\gamma$ -carboxyglutamate protein 2, bone $\gamma$ -carboxyglutamate protein 3, mOC-, mOC-A, mOC-B, mOC-X, O, OC, OCN, OC-X, OG, OG1, Og2, ORG, oste, Osteocalcin, Osteocalcin2                                                                                                                                                                                                                                                                                                                   |
| Ca2+             | 14127-61-8, Ca+2, calcium, calcium(2+), calcium cation, calcium citrate, calcium ion, calcium, ion (Ca2+), calcium ions, Citracal, tricalcium dicitrate                                                                                                                                                                                                                                                                                                                                                                                                                                                                                                                                                                                                               |
| cAMP             | 11002-78-1, 33116-15-3, 3',5'-cyclic AMP, 3',5'-monophosphate, adenosine cyclic, 37839-81-9, (4aR,6R,7R,7aS)-6-(6-aminopurin-9-yl)-2-hydroxy-2-oxo-4a,6,7,7a-tetrahydro-4H-furo[3,2-d][1,3,2]dioxaphosphinin-7-ol, 54532-48-8, 55576-98-2, 60-92-4, 66067-13-8, 68407-13-6, adenosine 3',5'-phosphate, adenosine, cyclic 3',5'-(hydrogen phosphate), adenosine cyclic 3,5 monophosphate, adenosine cyclic 3',5'-monophosphate, adenosine cyclic monophosphate, C10H12N5O6P, cAMP, cyclic-3',5'-monophosphate, adenosine, cyclic adenosine monophosphate, cyclic adenylic acid, cyclic AMP, disodium salt, cyclic AMP, monoammonium salt, cyclic AMP, monopotassium salt, cyclic AMP, monosodium salt, cyclic AMP, sodium salt                                         |
| CAV1             | BSCL3, Cav, cave, Caveolin1, CAVEOLIN, Caveolin1, caveolin 1, caveolae protein, CGL3, LCCNS, LOC100362870, MSTP085, PPH3, VIP21                                                                                                                                                                                                                                                                                                                                                                                                                                                                                                                                                                                                                                       |
| CCN3             | C130088N23RIK, CCN, cellular communication network factor 3, IBP-9, IGFBP-9, IGFBP-RP3, NOV, NOVH                                                                                                                                                                                                                                                                                                                                                                                                                                                                                                                                                                                                                                                                     |
| cGMP             | 3',5'-cyclic GMP, 7665-99-8, 9-[(4aR,6R,7R,7aS)-2,7-dihydroxy-2-oxo-4a,6,7,7a-tetrahydro-4H-furo[3,2-d][1,3,2]dioxaphosphinin-6-yl]-2-amino-1H-purin-6-one, C10H12N5O7P, cGMP, guanosine-3',5'-cyclic monophosphate, guanosine 3',5'-cyclic phosphate, guanosine cyclic 3',5'-(hydrogen phosphate)                                                                                                                                                                                                                                                                                                                                                                                                                                                                    |
| CK1              | Casein Kinase I, CKI                                                                                                                                                                                                                                                                                                                                                                                                                                                                                                                                                                                                                                                                                                                                                  |
| CTNNB1           | armadillo, Beta-cat, beta CATENIN, Bfc, Cat, CATENIN beta, catenin beta 1, catenin (cadherin associated protein), beta 1, catenin (cadherin associated protein), $\beta$ 1, CATENIN $\beta$ , catenin $\beta$ 1, CATNB, CTNB1, CTNNB, CTNN beta, CTNN $\beta$ , EVR7, Mesc, MRD19, NEDSDV, $\beta$ -cat, $\beta$ -catenin                                                                                                                                                                                                                                                                                                                                                                                                                                             |
| DAG              | DAG, diacylglycerides, diglyceride                                                                                                                                                                                                                                                                                                                                                                                                                                                                                                                                                                                                                                                                                                                                    |
| DBN1             | D0S117E, Drebrin, drebrin 1, Drebrin E, DREBRIN E2                                                                                                                                                                                                                                                                                                                                                                                                                                                                                                                                                                                                                                                                                                                    |
| Dopamine         | 1,2-benzenediol, 4-(2-aminoethyl)-, 1,2-benzenediol, 4-(2-aminoethyl)- (9CI), 4-(2-aminoethyl)benzene-1,2-diol, 50444-17-2, 51-61-6, 62-31-7, C8H11NO2, DA, dopamine HCl, dopamine hydrochloride, hydroxytyramine, Intropin, Revimine                                                                                                                                                                                                                                                                                                                                                                                                                                                                                                                                 |
| DRD1             | C030036C15RIK, D1, D1a, D1DR, D1R, D1 receptor, D1 receptors, Da-d1 receptor, DADR, Dopamine d1 receptor, dopamine receptor D1, DR1, Drd-, DRD1A, Gpcr, Gpcr15                                                                                                                                                                                                                                                                                                                                                                                                                                                                                                                                                                                                        |
| DRD2             | D2, D2a dopamine receptor, D2 DOPAMINE receptor, D2 dopaminergic receptor, D2DR, D2-like receptors, D2R, dopamine D2, Dopamine D2L receptor, dopamine D2 receptor, dopamine receptor D2, Drd-                                                                                                                                                                                                                                                                                                                                                                                                                                                                                                                                                                         |
| EGF              | A1790464, EGF-1, epidermal growth factor, HOMG4, URG                                                                                                                                                                                                                                                                                                                                                                                                                                                                                                                                                                                                                                                                                                                  |
| EGFR             | 9030024J15RIK, A1552599, C-ERBB, EGFR1, EGF receptor, EGFR VIII, EGF-TK, epidermal growth factor receptor, Erb, ERBB, ERBB1, Err, Errb1, ERRP, HER1, HER1 (EGFR), MENA, NISBD2, PIG61, Wa, wa-2, Wa5                                                                                                                                                                                                                                                                                                                                                                                                                                                                                                                                                                  |
| ERK1/2           | MAPK p44/42, MAPK p44/p42, p42/44 mapk, P42/p44 erk, P42/p44 mapk, p42/p44 MAP KINASE                                                                                                                                                                                                                                                                                                                                                                                                                                                                                                                                                                                                                                                                                 |
| F Actin          | Filamentous Actin                                                                                                                                                                                                                                                                                                                                                                                                                                                                                                                                                                                                                                                                                                                                                     |
| G proteinalpha I | Galphai, Gi, GI alpha, GI $\alpha$ , GNAI, Gn alpha, Gn $\alpha$ , G protein ai, G protein alpha I SUBUNITS, G protein $\alpha$ I, G protein $\alpha$ I SUBUNITS, Goi                                                                                                                                                                                                                                                                                                                                                                                                                                                                                                                                                                                                 |
| Glutamate        | 142-47-2, 19473-49-5, (2S)-2-aminopentanedioic acid, 56-86-0, C5H9NO4, Glu, glutamate, glutamic acid, glutaminol, L-Glu, L-glutamate, L-glutamic acid, monosodium glutamate, MPG, potassium glutamate, potassium L-glutamate, S-glutamate, sodium glutamate                                                                                                                                                                                                                                                                                                                                                                                                                                                                                                           |
| Glutamaterceptor | GluR                                                                                                                                                                                                                                                                                                                                                                                                                                                                                                                                                                                                                                                                                                                                                                  |
| GNAQ             | 1110005L02RIK, 623040102RIK, AA408290, AW060788, CMC1, DKFZp686D0521, Dsk, Dsk1, Dsk10, Gal, G-ALPHA-q, GAQ, G protein alpha Q, G protein alpha Q/11, G protein subunit alpha q, G protein subunit $\alpha$ q, G protein $\alpha$ Q, G protein $\alpha$ Q/11, Gq, Gqalpha, Gql, Gq protein alpha subunit, Gq protein $\alpha$ subunit, Gqq, guanine nucleotide binding protein, alpha q polypeptide, guanine nucleotide binding protein, $\alpha$ q polypeptide, G- $\alpha$ -q, Pst receptor, SWS                                                                                                                                                                                                                                                                    |
| GNAS             | 5530400H20RIK, A930027G11RIK, AHO, AHO2, ALEX, C130027O20RIK, C20orf45, G, Ga, G-alpha-8, G alpha S, GANGLIOSIDE EXPRESSION FACTOR 2, Gn, GNAS1, GNAS complex locus, GNAS (guanine nucleotide binding protein, alpha stimulating) complex locus, GNAS (guanine nucleotide binding protein, $\alpha$ stimulating) complex locus, Gnpas, G protein $\alpha$ s, GPSA, Gs-, GSA, Gs-alpha, Gs alpha subunit, Gs GTP-Binding, GSP, GS $\alpha$ , Gs $\alpha$ subunit, Guanine nucleotide binding protein, alpha stimulating, Guanine nucleotide binding protein, $\alpha$ stimulating, G- $\alpha$ -8, G $\alpha$ S, LOC100361691, LOC609994, N, Nes, NESP, Nesp55, NESPL, Oed, OEDSML, P, P1, P2, P3, PHP1A, PHP1B, PITA3, POH, RGD:621483, SCG, SCG6, Sgvl, XL, XLalphas |
| GRB2             | AA408164, ASH, Ash-psi, EGFRBP-GRB2, GRAB2, GRBS, growth factor receptor bound protein 2, MST084, MSTP084, NCKAP2                                                                                                                                                                                                                                                                                                                                                                                                                                                                                                                                                                                                                                                     |
| GTP              | [[[2R,3S,4R,5R)-5-(2-amino-6-oxo-1H-purin-9-yl)-3,4-dihydroxyoxolan-2-yl]methoxy-hydroxyphosphoryl] phosphono hydrogen phosphate, 86-01-1, C10H16N5O14P3, GTP, guanosine 5'-(tetrahydrogen triphosphate), Mg-GTP                                                                                                                                                                                                                                                                                                                                                                                                                                                                                                                                                      |
| Guanylatecyclase | 4.6.1.2, GC, GC activity, GTP diphosphate-lyase (cyclizing), Guanylate cyclase, guanyl cyclase, Guanylyl Cyclase                                                                                                                                                                                                                                                                                                                                                                                                                                                                                                                                                                                                                                                      |
| HTR2             | 5-HT2, 5-HT2 Receptor, 5-HTR2                                                                                                                                                                                                                                                                                                                                                                                                                                                                                                                                                                                                                                                                                                                                         |
| Insp3r           | Inositol 1,4,5-triphosphate receptor, Inositol Triphosphate Receptor, INSP3R, Ip3r, IP3 receptor, IP3-Sensitive Calcium Channel                                                                                                                                                                                                                                                                                                                                                                                                                                                                                                                                                                                                                                       |
| IP3              | 27121-73-9, inositol trisphosphate, IP3, myo-inositol, tris(dihydrogen phosphate)                                                                                                                                                                                                                                                                                                                                                                                                                                                                                                                                                                                                                                                                                     |
| LPA              | LPA, lysophosphatidic acids, lysophosphatidyl acid                                                                                                                                                                                                                                                                                                                                                                                                                                                                                                                                                                                                                                                                                                                    |
| LPAR1            | A1326300, clone 4.9, EDG2, ENDOTHELIAL DIFFERENTIATION LYSOPHOSPHATIDIC ACID G-protein-COUPLED receptor 2, Gpcr, Gpcr26, Kdt2, L, LPA1, LPA1 receptor, LPA2, LPA receptor 1, LYSOPHOSPHATIDIC ACID G-protein-COUPLED receptor, lysophosphatidic acid receptor 1, Mrec1.3. rec.1.3, vzg-, VZG1                                                                                                                                                                                                                                                                                                                                                                                                                                                                         |
| MAP2K1/2         | MEK1/2, MKK1/2                                                                                                                                                                                                                                                                                                                                                                                                                                                                                                                                                                                                                                                                                                                                                        |
| MAP2K5           | A1324775, A1428457, Hs171454, MAP kinase kinase 5, MAPKK5, MEK5, mitogen-activated protein kinase kinase 5, MKK5, PRKMK5                                                                                                                                                                                                                                                                                                                                                                                                                                                                                                                                                                                                                                              |
| MAP3K2           | 9630061B06RIK, A1585793, LOC100506904, M3K2, MEK2, MEKK2, mitogen-activated protein kinase kinase kinase 2                                                                                                                                                                                                                                                                                                                                                                                                                                                                                                                                                                                                                                                            |
| MAPK7            | b2b2346C, b2b2346Clo, BMK-1, ERK, ERK4, ERK-5, Erk5-T, ERK7, FRK, LOC100912585, mitogen-activated protein kinase 7, mitogen-activated protein kinase 7-like, PRKM7                                                                                                                                                                                                                                                                                                                                                                                                                                                                                                                                                                                                    |
| NO               | 10102-43-9, Amidogen, oxo-, EDRF, gaseous nitric oxide, Genosyl, inhaled nitric oxide, INOmax, Mononitrogen monoxide, nitric oxide, nitric oxide gas, nitric oxide gas radical, Nitric oxide trimer, Nitrogen monooxide, nitrogen monoxide, nitrogen oxide (NO), nitrogen protoxide, Nitrosyl radical, NMO, NO                                                                                                                                                                                                                                                                                                                                                                                                                                                        |
| Norepinephrine   | 108341-18-0, 1,2-benzenediol, 4-(2-amino-1-hydroxyethyl)-, (R)- (9CI), 1,2-benzenediol, 4-((R)-2-amino-1-hydroxyethyl)-, [3H]-norepinephrine, 4-[(1R)-2-amino-1-hydroxyethyl]benzene-1,2-diol, 51-41-2, benzyl alcohol, alpha-(aminomethyl)-3,4-dihydroxy-, (-), benzyl alcohol, $\alpha$ -(aminomethyl)-3,4-dihydroxy-, (-), C8H11NO3, D-(-)-noradrenaline, Levophed, Levophed Bitartrate, L-noradrenaline, L-norepinephrine, NE, NE-hydrochloride, noradrenalin, noradrenaline, (-)-noradrenaline, (-)-norepinephrine, norepinephrine bitartrate, (R)-noradrenaline, (R)-norepinephrine, (R)-(-)-norepinephrine                                                                                                                                                     |
| PI3K             | 1-phosphatidylinositol 3-kinase, 2.7.1.137, ATP:1-phosphatidyl-1D-myo-inositol 3-phosphotransferase, Phosphatidylinositol 3 kinase, phosphatidylinositol 3'-kinase, PI3-kinase, PtdIns 3 Kinase, type III phosphoinositide 3-kinase, type I phosphatidylinositol kinase, Vps34p                                                                                                                                                                                                                                                                                                                                                                                                                                                                                       |
| PIP2             | 1,2-diacyl-sn-glycero-3-phospho-(1'-myo-inositol-4',5'-bisphosphate), 1-O-(3-sn-phosphatidyl)-1D-myo-inositol 4,5-bis(dihydrogen phosphate), 1-phosphatidyl-1D-myo-inositol 4,5-bisphosphate, C11H19O19P3R2                                                                                                                                                                                                                                                                                                                                                                                                                                                                                                                                                           |
| PKA              | A-Kinase, cAMP-Dependent Protein Kinase, cyclic AMP dependent protein kinase, protein KINASE A                                                                                                                                                                                                                                                                                                                                                                                                                                                                                                                                                                                                                                                                        |
| PKC              | Cnppc, PKC, Pkc(s), Protein Kinase C                                                                                                                                                                                                                                                                                                                                                                                                                                                                                                                                                                                                                                                                                                                                  |
| PKG              | cgk, protein KINASE G                                                                                                                                                                                                                                                                                                                                                                                                                                                                                                                                                                                                                                                                                                                                                 |
| PLC              | 3.1.4.3, alpha-toxin, Clostridium oedematiens beta- and g-toxins, Clostridium oedematiens $\beta$ - and g-toxins, Clostridium welchii alpha-toxin, Clostridium welchii $\alpha$ -toxin, heat-labile haemolysin, heat-labile hemolysin, lecithinase C, lipophosphodiesterase C, lipophosphodiesterase I, phosphatidase C, phosphatidylcholine cholinephosphohydrolase, PHOSPHOINOSITIDE SPECIFIC PHOSPHOLIPASE C, Phospholipase C, Pi-plc, $\alpha$ -toxin                                                                                                                                                                                                                                                                                                             |
| RAF1             | 6430402F14RIK, AA990557, BB129353, CMD1NN, c-R, Cra, CRAF, Craf1, D830050J10RIK, leukaemia ONCOGENE HOMOLOG1, LEUKEMIA ONCOGENE HOMOLOG1, NS5, Raf-1 proto-oncogene, serine/threonine kinase, v-, v-Raf, v-raHeukaemia viral oncogene 1, v-raHeukemia viral oncogene 1                                                                                                                                                                                                                                                                                                                                                                                                                                                                                                |
| Serotonin        | 3-(2-aminoethyl)-1H-indol-5-ol, 3-(2-aminoethyl)indol-5-ol, 50-67-9, 5-HT, C10H12N2O, indol-5-ol, 3-(2-aminoethyl)-, serotonin                                                                                                                                                                                                                                                                                                                                                                                                                                                                                                                                                                                                                                        |
| SGSM3            | 1810012I01RIK, A1428557, BB175482, bdf1-1, CIP, CIPB5, MAP, R75178, RABGAP5, RABGAPLP, RUSC3, Rutbc, RUTBC3, small G protein signaling modulator 3                                                                                                                                                                                                                                                                                                                                                                                                                                                                                                                                                                                                                    |
| SP1              | 1110003E12RIK, AA450830, A1845540, Sp1-1, Sp1 transcription factor, Sp1 (trans spliced isoform), Trans-acting transcription factor 1                                                                                                                                                                                                                                                                                                                                                                                                                                                                                                                                                                                                                                  |
| SP3              | D1300027J01RIK, Sp3 transcription factor, SPR2, trans-acting transcription factor 3                                                                                                                                                                                                                                                                                                                                                                                                                                                                                                                                                                                                                                                                                   |
| SRC              | ASV, AW259666, BS27, c-SRC, p60-Src, PP60, pp60c, Pp60/c-Src, pp60c-src, Rous sarcoma oncogene, SRC1, SRC proto-oncogene, non-receptor tyrosine kinase, THC6, TVHUSC                                                                                                                                                                                                                                                                                                                                                                                                                                                                                                                                                                                                  |
| TUBULIN          | microtubule, tubulin complex                                                                                                                                                                                                                                                                                                                                                                                                                                                                                                                                                                                                                                                                                                                                          |

# Pathway Analysis Using IPA Software; canonical pathway

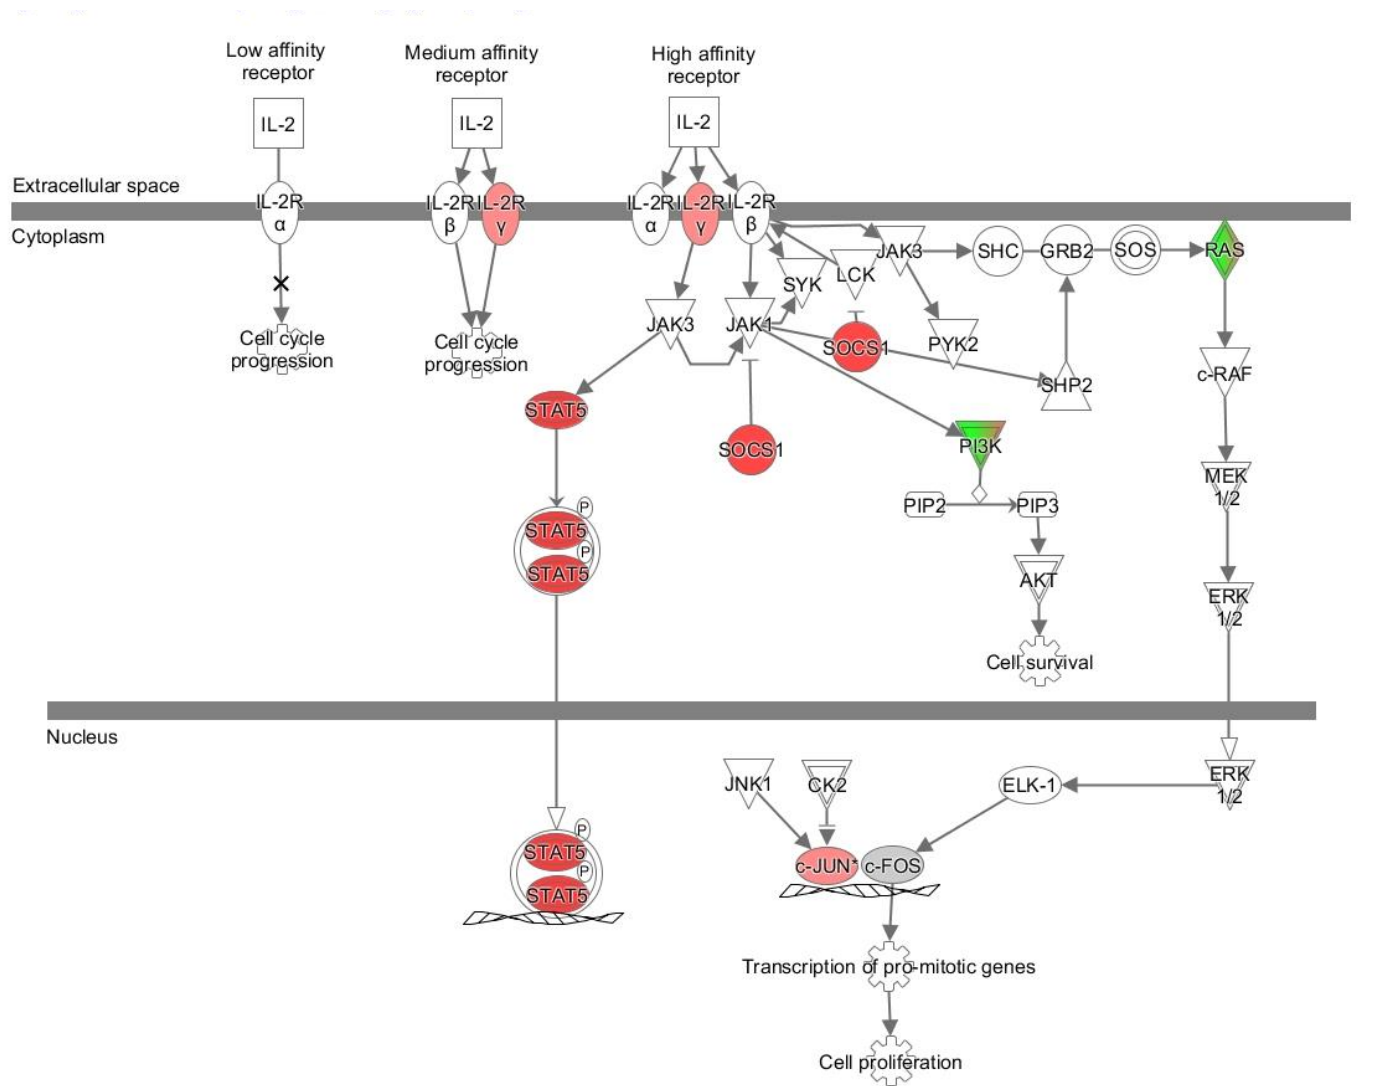

Figure S40. IL-2 Signaling at 6 h

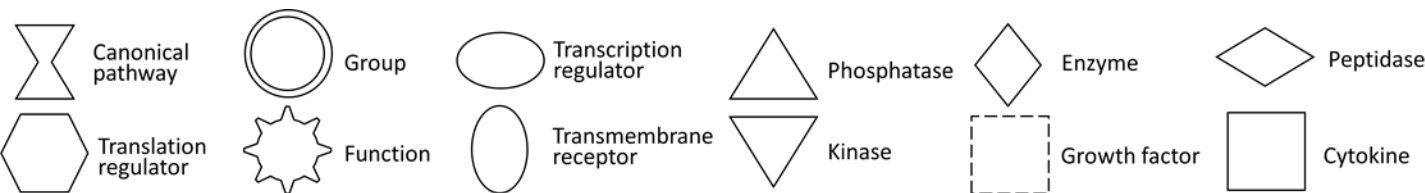

Red: Increased, FDR<0.05 versus solvent control

Green: Decreased, FDR<0.05 versus solvent control

| Symbol   | Synonym(s)                                                                                                                                                                                                                                                                                                                                                                                                                                                                                                                                                                                                                                                                                     |
|----------|------------------------------------------------------------------------------------------------------------------------------------------------------------------------------------------------------------------------------------------------------------------------------------------------------------------------------------------------------------------------------------------------------------------------------------------------------------------------------------------------------------------------------------------------------------------------------------------------------------------------------------------------------------------------------------------------|
| AKT      | AKT1/2/3, B/Akt, PKB, RAC-PK                                                                                                                                                                                                                                                                                                                                                                                                                                                                                                                                                                                                                                                                   |
| CK2      | Casein Kinase II, CKII                                                                                                                                                                                                                                                                                                                                                                                                                                                                                                                                                                                                                                                                         |
| ELK1     | ELK, ELK1, member of ETS oncogene family, ETS transcription factor ELK1, p62TCF, RGD:2549, TCF/ELK                                                                                                                                                                                                                                                                                                                                                                                                                                                                                                                                                                                             |
| ERK1/2   | MAPK p44/42, MAPK p44/p42, p42/44 mapk, P42/p44 erk, P42/p44 mapk, p42/p44 MAP KINASE                                                                                                                                                                                                                                                                                                                                                                                                                                                                                                                                                                                                          |
| FOS      | AP-1, c-f, C-FOS, D12Rfj, D12Rfj1, FBJ osteosarcoma oncogene, Fos proto-oncogene, AP-1 transcription factor subunit, p55                                                                                                                                                                                                                                                                                                                                                                                                                                                                                                                                                                       |
| GRB2     | AA408164, ASH, Ash-psi, EGFRBP-GRB2, GRAB2, GRBS, growth factor receptor bound protein 2, MST084, MSTP084, NCKAP2                                                                                                                                                                                                                                                                                                                                                                                                                                                                                                                                                                              |
| IL2      | IL, interleukin 2, lymphokine, TCGF                                                                                                                                                                                                                                                                                                                                                                                                                                                                                                                                                                                                                                                            |
| IL2RA    | CD25, I, IDDM10, IL2R, IL2RAC, Il 2 receptor $\alpha$ subunit, IL-2 Ra, IMD41, interleukin 2 receptor, alpha chain, interleukin 2 receptor subunit alpha, interleukin 2 receptor subunit $\alpha$ , interleukin 2 receptor $\alpha$ , Interleukin 2 receptor $\alpha$ chain, interleukin 2 receptor, $\alpha$ chain, Ly-4, Ly-43, p55, TAC, TAC ANTIGEN, TCGFR                                                                                                                                                                                                                                                                                                                                 |
| IL2RB    | CD122, IL-15R, IL15RB, IL-15R beta, IL-15R $\beta$ , IL-2/15Rbeta, IL-2R, IL2RBC, IL2Rbeta, IL-2R $\beta$ , Il2r $\beta$ C, IMD63, interleukin 2 receptor, beta chain, interleukin 2 receptor subunit beta, interleukin 2 receptor subunit $\beta$ , interleukin 2 receptor, $\beta$ chain, p70, P70-75                                                                                                                                                                                                                                                                                                                                                                                        |
| IL2RG    | Ab2-183, CD132, CIDX, common cytokine receptor $\gamma$ chain, Common Gamma Chain Receptor, Common $\gamma$ Chain, Common $\gamma$ Chain Receptor, Cr gamma, Cr $\gamma$ , CYTOKINE receptor COMMON gamma CHAIN, CYTOKINE receptor COMMON $\gamma$ CHAIN, gamm, gamma(c), gc, [g]c, IL-12R gamma, IL-12R $\gamma$ , IL15RG, IL-2/15R gamma, IL-2/15R $\gamma$ , IL-2 receptor $\gamma$ c, IL2R gamma, IL-2R $\gamma$ , IL4R gamma, IL4R $\gamma$ , IL7 Rgamma, IMD4, interleukin 2 receptor, gamma chain, interleukin 2 receptor subunit gamma, interleukin 2 receptor subunit $\gamma$ , interleukin 2 receptor, $\gamma$ chain, P64, SCIDX, SCIDX1, $\gamma$ C, $\gamma$ (c), $\gamma$ chain |
| JAK1     | AA960307, AIIDE, BAP0, BAP004, C130039L05Rik, JAK1A, JAK1B, Janus kinase 1, JTK3, LOC105378775                                                                                                                                                                                                                                                                                                                                                                                                                                                                                                                                                                                                 |
| JAK3     | fae, JAKL, Janus kinase 3, L-JAK, RATJAK3, wil                                                                                                                                                                                                                                                                                                                                                                                                                                                                                                                                                                                                                                                 |
| JUN      | Activator protein 1, AP-1, API-1, c-ju, cJUN, Junc, jun proto-oncogene, Jun proto-oncogene, AP-1 transcription factor subunit, LOC100288387, LOC100291417, LOC100293034, p39, v-Jun, V-jun Avian Sarcoma Virus 17 Oncogene Homolog, V-jun Sarcoma Virus 17 Oncogene Homolog                                                                                                                                                                                                                                                                                                                                                                                                                    |
| LCK      | Hck-3, IMD22, Lck1, LCK proto-oncogene, Src family tyrosine kinase, Lcktkr, LSK, Lskt, lymphocyte protein tyrosine kinase, p56Lck, pp58lck, YT16                                                                                                                                                                                                                                                                                                                                                                                                                                                                                                                                               |
| MAP2K1/2 | MEK1/2, MKK1/2                                                                                                                                                                                                                                                                                                                                                                                                                                                                                                                                                                                                                                                                                 |
| MAPK8    | A1849689, C-JUN N-TERMINAL KINASE1, JNK, JNK1, JNK1A2, JNK21B1/2, JNK-46, mitogen-activated protein kinase 8, p46JNK1, p46JNK1 alpha, p46JNK1 $\alpha$ , Prk, PRKM8, SAPK1, SAPK1c, Sapk gamma, SAPK P46, Sapk $\gamma$ , STRESS-ACTIVATED protein KINASE-LIKE KINASE                                                                                                                                                                                                                                                                                                                                                                                                                          |
| PI3K     | 1-phosphatidylinositol 3-kinase, 2.7.1.137, ATP:1-phosphatidyl-1D-myo-inositol 3-phosphotransferase, Phosphatidylinositol 3 kinase, phosphatidylinositol 3'-kinase, PI3-kinase, PtdIns 3 Kinase, type III phosphoinositide 3-kinase, type I phosphatidylinositol kinase, Vps34p                                                                                                                                                                                                                                                                                                                                                                                                                |
| PIP2     | 1,2-diacyl-sn-glycero-3-phospho-(1'-myo-inositol-4',5'-bisphosphate), 1-O-(3-sn-phosphatidyl)-1D-myo-inositol 4,5-bis(dihydrogen phosphate), 1-phosphatidyl-1D-myo-inositol 4,5-bisphosphate, C11H19O19P3R2                                                                                                                                                                                                                                                                                                                                                                                                                                                                                    |
| PIP3     | 1-phosphatidyl-1D-myo-inositol 3,4,5-trisphosphate, phosphatidylinositol-3,4,5-trisphosphate, phosphoinositide (3,4,5) P3, PI(3,4,5)P3, PIns(3,4,5)P3, PIP3, PtdIns(3,4,5)P3                                                                                                                                                                                                                                                                                                                                                                                                                                                                                                                   |
| PTK2B    | CADTK, CAKB, CAKbe, CAK beta, CAK $\beta$ , cell adhesion kinase $\beta$ , E430023O05Rik, FADK2, FAK2, PKB, protein tyrosine kinase 2 beta, protein tyrosine kinase 2 $\beta$ , PTK, PTK2 protein tyrosine kinase 2 beta, PTK2 protein tyrosine kinase 2 $\beta$ , PYK, PYK2, Raf, RAFTK                                                                                                                                                                                                                                                                                                                                                                                                       |
| PTPN11   | 2700084A17Rik, AW536184, BPTP3, CFC, JMML, METCDS, MGC14433, Noonan syndrome 1, NS1, protein tyrosine phosphatase non-receptor type 11, protein tyrosine phosphatase, non-receptor type 11, PTP, PTP-1D, PTP2C, S, SAP-2, Sh, SH-P, SHP-2, SH-PTP2, SH-PTP3, Src homology protein 2, SYP                                                                                                                                                                                                                                                                                                                                                                                                       |
| RAF1     | 6430402F14Rik, AA990557, BB129353, CMD1NN, c-R, Cra, CRAF, Craf1, D830050J10Rik, leukaemia ONCOGENE HOMOLOG1, LEUKEMIA ONCOGENE HOMOLOG1, NS5, Raf-1 proto-oncogene, serine/threonine kinase, v-, v-Raf, v-raf-Leukaemia viral oncogene 1, v-raf-Leukemia viral oncogene 1                                                                                                                                                                                                                                                                                                                                                                                                                     |
| SHC1     | p52SHC, p6, p66, p66s, P66shc, Sh, SHC, Shc (46 kDa isoform), SHCA, SHC adaptor protein 1, Shc p66 isoform, src homology 2 domain-containing transforming protein C1                                                                                                                                                                                                                                                                                                                                                                                                                                                                                                                           |
| SOCS1    | Cis, CIS1, CISH1, Cish7, JA, JAB, JBP, SOC, Sosc1, SS, SSI-1, STAT INDUCED STAT INHIBITOR-1, suppressor of cytokine signaling 1, TIP-3                                                                                                                                                                                                                                                                                                                                                                                                                                                                                                                                                         |
| STAT5    | Mgf, STAT5                                                                                                                                                                                                                                                                                                                                                                                                                                                                                                                                                                                                                                                                                     |
| SYK      | p72-Syk, Ptk72, spleen associated tyrosine kinase, spleen tyrosine kinase                                                                                                                                                                                                                                                                                                                                                                                                                                                                                                                                                                                                                      |

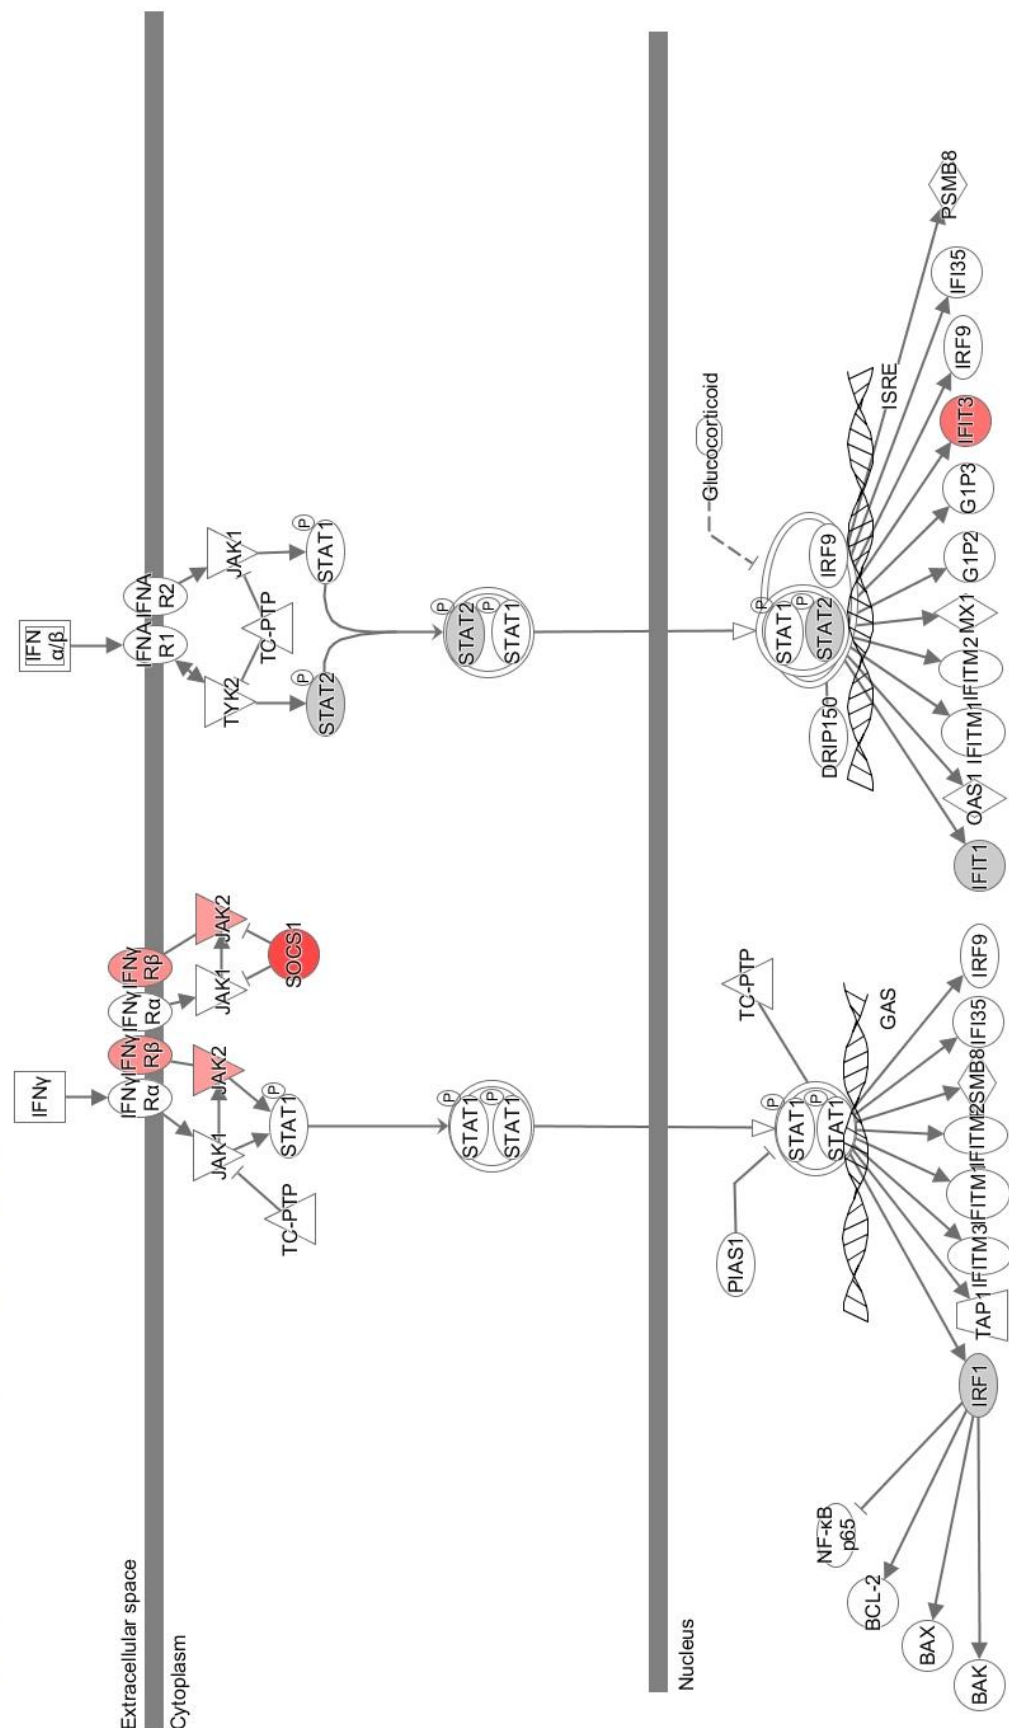

Figure S41. Interferon Signaling at 6 h

Red: Increased, FDR<0.05 versus control

Green: Decreased, FDR<0.05 versus control

| Symbol         | Synonym(s)                                                                                                                                                                                                                                                                                                                                                                                                                                                                                                                                                                                                                                                                                                  |
|----------------|-------------------------------------------------------------------------------------------------------------------------------------------------------------------------------------------------------------------------------------------------------------------------------------------------------------------------------------------------------------------------------------------------------------------------------------------------------------------------------------------------------------------------------------------------------------------------------------------------------------------------------------------------------------------------------------------------------------|
| BAK1           | Ba, BAK, BAK-LIKE, BCL2-antagonist/killer 1, BCL2L7, CDN1, N-B, N-BAK1                                                                                                                                                                                                                                                                                                                                                                                                                                                                                                                                                                                                                                      |
| BAX            | Bcl2-associated X, BCL2 associated X, apoptosis regulator, BCL2-associated X protein, BCL2L4                                                                                                                                                                                                                                                                                                                                                                                                                                                                                                                                                                                                                |
| BCL2           | AW986256, B cell leukaemia/lymphoma 2, B cell leukemia/lymphoma 2, Bcl-, Bcl2 alpha, BCL2 apoptosis regulator, BCL2, apoptosis regulator, Bcl2 $\alpha$ , C430015F12Rik, D630044D05RIK, D830018M01RIK, LOC100046608, ORF16, PPP1R50                                                                                                                                                                                                                                                                                                                                                                                                                                                                         |
| Glucocorticoid | glucocorticoid hormone, glucocorticosteroid, glucocorticosteroids                                                                                                                                                                                                                                                                                                                                                                                                                                                                                                                                                                                                                                           |
| IFI35          | 201008K16RIK, AW986054, IFP, IFP35, interferon-induced protein 35, IPF35                                                                                                                                                                                                                                                                                                                                                                                                                                                                                                                                                                                                                                    |
| IFi6           | 6-16, FAM14C, G1P3, IFi-6-16, IFi6-26, IFN6-16, IFN alpha REGULATED, IFN $\alpha$ REGULATED, INTERFERON alpha INDUCIBLE, interferon alpha inducible protein 6, INTERFERON INDUCIBLE PEPTIDE (6-16), INTERFERON $\alpha$ INDUCIBLE, interferon $\alpha$ inducible protein 6, ISG6-16                                                                                                                                                                                                                                                                                                                                                                                                                         |
| IFIT1          | 2010002M12Rik, AW412491, C56, G10P1, Gm14446, Ifi, IFi-56, IFi-56K, Ifit1b, Ifit1bl, Ifit1bl1, Ifit1bl2, Ifit1c, Ifit1b, Ifit5, IFN56K, IFNAi1, IFN STIMULATED GENE 56, IFN/TETRA1, interferon induced protein with tetratricopeptide repeats 1, interferon-induced protein with tetratricopeptide repeats 1B-like, interferon induced protein with tetratricopeptide repeats 1B like 2, interferon induced protein with tetratricopeptide repeats 1B like 1, INTERFERON INDUCIBLE, INTERFERON INDUCIBLE 56KD, ISG, ISG56, P56, RNM561                                                                                                                                                                      |
| IFIT3          | CIG-41, CIG-49, GARG-49, I830012O16RIk, Ifi, Ifi49, IFi60, IFi-60K, Ifit3b, IFIT4, interferon-induced protein with tetratricopeptide repeats 3, interferon-induced protein with tetratricopeptide repeats 3B, IRG2, ISG-561, ISG60, P49, P60, RIG-G                                                                                                                                                                                                                                                                                                                                                                                                                                                         |
| IFITM1         | 1110036C17Rik, 9-27, CD225, DSPA2a, fra, HUM927A, IFi17, IFi27SEP, IFiM1, IFM1 9-27, IFN9-27, interferon induced transmembrane protein 1, LEU13, Mi, Mil-2                                                                                                                                                                                                                                                                                                                                                                                                                                                                                                                                                  |
| IFITM2         | 1-8D, DSPA2c, fra, fragilis3, Ifi 16, IFi1-8U, Ifit, IFITM3L, IFITML, IFN1-8D, interferon induced transmembrane protein 2, Interferon induced transmembrane protein 3-like, mil, mil-3                                                                                                                                                                                                                                                                                                                                                                                                                                                                                                                      |
| IFITM3         | 1110004C05RIk, 1-8U, Cd225, Cdw217, DSPA2b, Fg, FGLS, fr, IFN1-8U, Interferon beta induced, Interferon induced, interferon induced transmembrane protein 3, Interferon inducible, Interferon $\beta$ induced, IP, IP15, mil, mil-1, rat8                                                                                                                                                                                                                                                                                                                                                                                                                                                                    |
| lfnalpha/beta  | IFNalpha/beta late, IFN-I, lfn type i, IFN- $\alpha$ $\beta$ , IFNa/ $\beta$ , IFNa/ $\beta$ late, Interferon alpha/beta, Interferon $\alpha/\beta$                                                                                                                                                                                                                                                                                                                                                                                                                                                                                                                                                         |
| IFNAR1         | alpha CHAIN of type I IFNR, AVP, I, If, Ifar, IFN-alpha-beta-R, IFNalpha/betaR, Ifn-alpha/beta-receptor, IFN alpha/beta receptor 1, IFN-alpha-REC, IFNAR, IFNBR, IFN receptor CHAIN 1, IFN receptor type 1, IFN type 1 receptor, IFN- $\alpha$ -REC, IFN $\alpha/\beta$ R, IFN- $\alpha$ - $\beta$ -R, Ifn- $\alpha/\beta$ -receptor, IFN $\alpha/\beta$ receptor 1, IFRC, Infar, interferon (alpha and beta) receptor 1, interferon alpha and beta receptor subunit 1, Interferon Receptor, interferon ( $\alpha$ and $\beta$ ) receptor 1, interferon $\alpha$ and $\beta$ receptor subunit 1, LOC284829, type 1 interferon receptor, Type I IFNR, Type I infr, $\alpha$ CHAIN of type I IFNR, $\beta$ r1 |
| IFNAR2         | Ai747302, beta subunit of type I IFNR, Ifn, IFNABR, IFNalphabetaR, IFN-alpha-REC, IFNARB, IFN-R, IFN- $\alpha$ -REC, IFNa $\beta$ R, IMD45, interferon (alpha and beta) receptor 2, interferon alpha and beta receptor subunit 2, interferon ( $\alpha$ and $\beta$ ) receptor 2, interferon $\alpha$ and $\beta$ receptor subunit 2, Type II IFNR, $\beta$ subunit of type I IFNR                                                                                                                                                                                                                                                                                                                          |
| IFNG           | If, If2f, IFG, IFi, IFN-2, IFNG2, IFN gamma, IFN-II, IFN type II, IFN- $\gamma$ , IMD69, INF- $\gamma$ , Interferon gamma, Interferon $\gamma$ , type II INTERFERON, $\gamma$ -Ifn, $\gamma$ interferon                                                                                                                                                                                                                                                                                                                                                                                                                                                                                                     |
| IFNGR1         | CD119, If, Ifgr, IFN-g, IFN-gammaR, IFN gamma R alpha, IFN-gamma receptor, IFNGR, Ifngra, IFNR, IFNyR, IFN- $\gamma$ R1, IFN- $\gamma$ receptor, IFNy R $\alpha$ , IMD27A, IMD27B, interferon gamma receptor 1, INTERFERON gamma receptor alpha CHAIN, interferon $\gamma$ receptor, interferon $\gamma$ receptor 1, INTERFERON $\gamma$ receptor $\alpha$ CHAIN, MAF receptor, Nk, Nktar                                                                                                                                                                                                                                                                                                                   |
| IFNGR2         | AF-1, Ifg, IFGR2, Ifgt, IFNgamma Rbeta, IFNGRB, IFNGT1, IFNy R2, IFNy R $\beta$ , IMD28, interferon gamma receptor 2, interferon $\gamma$ receptor 2                                                                                                                                                                                                                                                                                                                                                                                                                                                                                                                                                        |
| IRF1           | AU020929, IFN REGULATORY FACTOR 1, interferon regulatory factor 1, Irf, ISGF2, LSIR, MAR                                                                                                                                                                                                                                                                                                                                                                                                                                                                                                                                                                                                                    |
| IRF9           | interferon regulatory factor 9, INTERFERON-STIMULATING TRANSCRIPTION FACTOR 3 gamma, INTERFERON-STIMULATING TRANSCRIPTION FACTOR 3 $\gamma$ , Irf, Isgf, ISGF3, ISGF3G, isgf3 $\gamma$ , p4, p48                                                                                                                                                                                                                                                                                                                                                                                                                                                                                                            |
| ISG15          | G1p, G1P2, Gip2, hUCRP, HUMFN15K, IFi15, IFi-15K, IFN15/17, IFN-alpha-INDUCIBLE, IFN-INDUCIBLE protein 15 KD, IFN- $\alpha$ -INDUCIBLE, IGI15, IMD38, INTERFERON-INDUCED 17-KDA, INTERFERON-STIMULATED protein 15 KDa, IP17, Irfp, Isg15/17, ISG15 ubiquitin-like modifier, LOC100044225, UCRP                                                                                                                                                                                                                                                                                                                                                                                                              |
| JAK1           | AA960307, AIIIDE, BAP0, BAP004, C130039L05RIk, JAK1A, JAK1B, Janus kinase 1, JTK3, LOC105378775                                                                                                                                                                                                                                                                                                                                                                                                                                                                                                                                                                                                             |
| JAK2           | Ai504024, C81284, Fd17, Janus kinase 2, JTK10                                                                                                                                                                                                                                                                                                                                                                                                                                                                                                                                                                                                                                                               |
| MED14          | 9930001L01RIK, AU041628, Cr, CRSP150, CRSP2, CSRP, CXorf4, DRIP150, ENSMUSG00000073278, EXLM1, Gm641, mediator complex subunit 14, ORF1, RGD1560170, RGR1, Trap, TRAP170                                                                                                                                                                                                                                                                                                                                                                                                                                                                                                                                    |
| MX1            | Ai893580, IFI78, IFi-78K, IncMX1-215, MX, Mx2, Mx2 + Mx3, Mx3, MxA, MX dynamin like GTPase 1, MX dynamin like GTPase 2, MYX1                                                                                                                                                                                                                                                                                                                                                                                                                                                                                                                                                                                |
| OAS1           | 2-5A SYNTHETASE, 2',5'-oligoadenylate synthetase, 2'5' OLIGOADENYLATE SYNTHETASE1, 2'-5' oligoadenylate synthetase 1A, 2'-5' oligoadenylate synthetase 1G, 2'-5' OLIGO A SYNTHETASE E, A1449562, E18/E16, IFi-4, L, L2, L3, Mmu-, Mmu-L, Mmu-L2, O, OAS1A, Oas1b, Oas1c, Oas1g, OAS p40/46, Oi, OIAS, Oias-1, OIASI                                                                                                                                                                                                                                                                                                                                                                                         |
| PIAS1          | 2900068C24RIk, Ddxbp, DDGBP1, GB, GBP, GU/RH-II, protein inhibitor of activated STAT 1, protein inhibitor of activated STAT, 1, ZMIZ3                                                                                                                                                                                                                                                                                                                                                                                                                                                                                                                                                                       |
| PSMB8          | 20s proteasome subunit, ALDD, Beta 5i, beta 5I IMMUNOPROTEASOME subunit, D6S216, D6S216E, JMP, large multifunctional protease-7, Lm, Lmp, LMP7, Lmp8, NKJO, PRAAS1, proteasome 20S subunit beta 8, proteasome 20S subunit $\beta$ 8, proteasome (prosome, macropain) subunit, beta type 8 (large multifunctional peptidase 7), proteasome subunit Y, PSMB5i, Rc1, RING10, $\beta$ 5i, $\beta$ 5I IMMUNOPROTEASOME subunit (prosome, macropain) subunit, $\beta$ type 8 (large multifunctional peptidase 7)                                                                                                                                                                                                  |
| PTPN2          | Ai325124, protein tyrosine phosphatase non-receptor type 2, protein tyrosine phosphatase, non-receptor type 2, Pt, PTN2, PTPase, Ptps, PTPT, Tc45, TCELLPTP, T CELL PTPASE, TC-P, TC-PTP                                                                                                                                                                                                                                                                                                                                                                                                                                                                                                                    |
| RELA           | CMCU, NF-kappa B, NF-kappa B (p65), NF KAPPA B subunit P65, NFkB, NFKB3, NF-k B (p65), NFkB/p65, NF- $\kappa$ B, NF- $\kappa$ B (p65), NF- $\kappa$ B p65, NF $\kappa$ B subunit P65, nos2, p6, p65, p65 NF-kappa B, p65 NFkB, p65 NF- $\kappa$ B, p65/Rela, RELA proto-oncogene, NF-kB subunit, v-rel reticuloendotheliosis viral oncogene homolog A (avian)                                                                                                                                                                                                                                                                                                                                               |
| SOCS1          | Cis, CIs1, CISH1, Cish7, JA, JAB, JBP, SOC, Sosc1, SS, SSI-1, STAT INDUCED STAT INHIBITOR-1, suppressor of cytokine signaling 1, TIP-3                                                                                                                                                                                                                                                                                                                                                                                                                                                                                                                                                                      |
| STAT1          | 2010005J02RIk, AA408197, CANDF7, DD6G4-4, IMD31A, IMD31B, IMD31C, ISGF-3, p91, signal transducer and activator of transcription 1, STAT1 alpha, Stat1 beta, Stat1 p91, STAT1 $\alpha$ , Stat1 $\beta$ , STAT91, TRANSCRIPTION FACTOR SIGNAL TRANSDUCER and ACTIVATOR                                                                                                                                                                                                                                                                                                                                                                                                                                        |
| STAT2          | 1600010G07RIk, AW496480, IMD44, ISGF-3, P113, PTORCH3, signal transducer and activator of transcription 2, STAT113                                                                                                                                                                                                                                                                                                                                                                                                                                                                                                                                                                                          |
| TAP1           | ABC17, Abcb, ABCB2, APT1, Cim, D6S114E, Ham-, Ham-1, MTP, MTP1, PSF, PSF-1, RI, RING4, T, TAP, TAP1*0102N, TAP1N, Tap2, TRANSPORTER 1 ATP-binding CASSETTE SUBFAMILY B, transporter 1, ATP-binding cassette, sub-family B (MDR/TAP), transporter 1, ATP binding cassette subfamily B member, TRANSPORTER 1 (MDR/TAP), Y3                                                                                                                                                                                                                                                                                                                                                                                    |
| TYK2           | IMD35, JTK1, tyrosine kinase 2                                                                                                                                                                                                                                                                                                                                                                                                                                                                                                                                                                                                                                                                              |

# Pathway Analysis Using IPA Software; canonical pathway

1 h

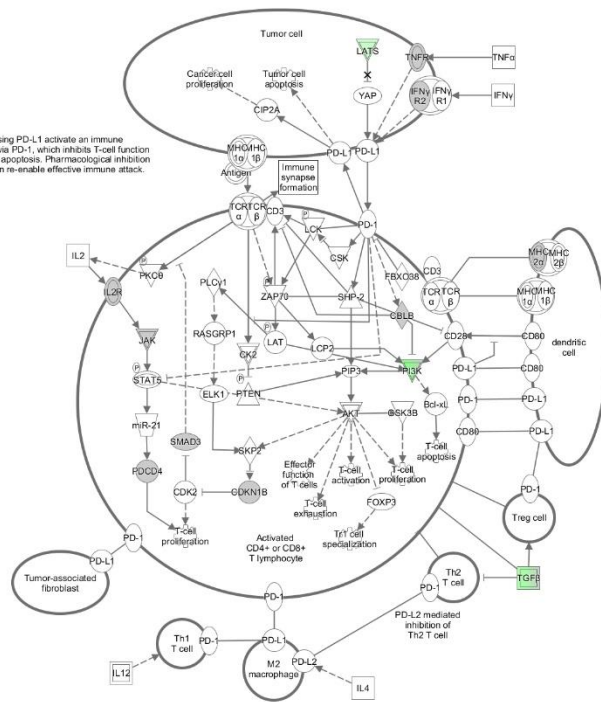

6 h

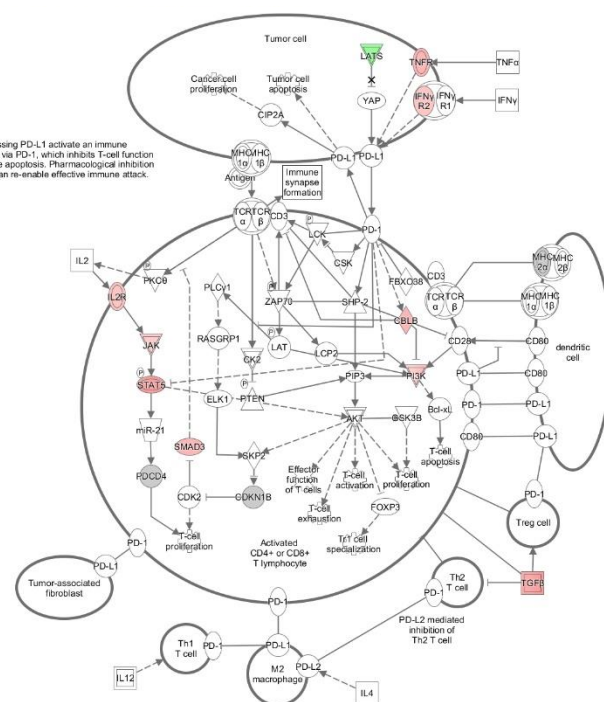

24 h

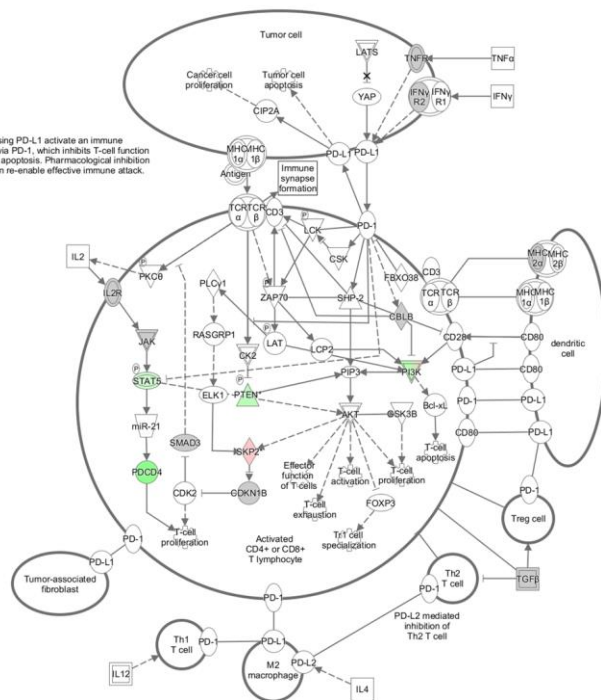

8 days

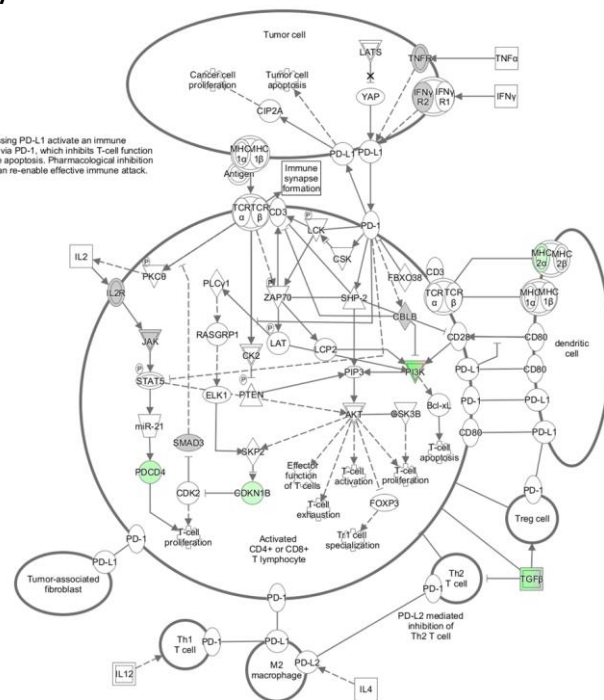

Figure S42. PD-1, PD-L1 cancer immunotherapy pathway

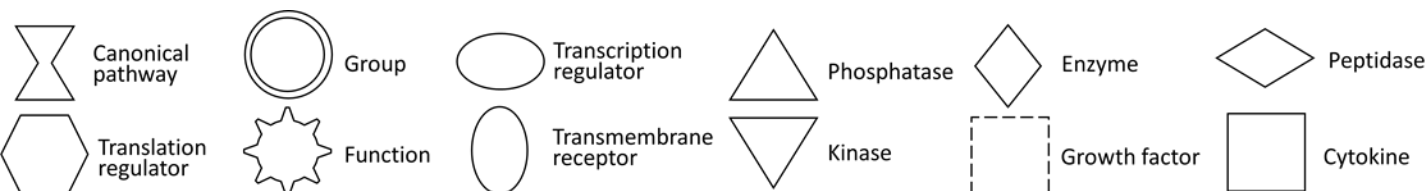

Red: Increased, FDR<0.05 versus solvent control

Green: Decreased, FDR<0.05 versus solvent control

| Symbol          | Synonym(s)                                                                                                                                                                                                                                                                                                                                                                        |
|-----------------|-----------------------------------------------------------------------------------------------------------------------------------------------------------------------------------------------------------------------------------------------------------------------------------------------------------------------------------------------------------------------------------|
| AKT             | AKT1/2/3, B/Akt, PKB, RAC-PK                                                                                                                                                                                                                                                                                                                                                      |
| Bcl-xL          | bBclxl, Bcl-X beta, Bcl-X $\beta$ , BCL-XL/S, BCL2-like 1, BCL2L, BCLX, Bclx gamma, Bclx $\gamma$ , PPP1R52                                                                                                                                                                                                                                                                       |
| CBLB            | A429560, A1851073, Casitas B-lineage lymphoma b, Cbl proto-oncogene B, Nbla00127, RNF56                                                                                                                                                                                                                                                                                           |
| CD28            | CD28 ANTIGEN, CD28L, CD28 molecule, CD28RNA, LOC100048845, Tp44                                                                                                                                                                                                                                                                                                                   |
| CD3             | 4930549J05RIK, A430104F18RIK, AW552088, CD16Z, CD247 antigen, CD247 molecule, Cd3, CD3H, CD3 NU, CD3Q, CD3Z, CD3-ZETA, CD3- $\zeta$ , IMD25, T3Z, Tcrk, TCRZ, TCRzeta, Tcr $\zeta$                                                                                                                                                                                                |
| CD80            | B7, B7-1, B7.1, BB1, Cd28L, CD28LG, CD28LG1, CD80 antigen, CD80 molecule, LAB7, LOC100360171, Ly-53, MIC17, TSA1                                                                                                                                                                                                                                                                  |
| CDK2            | A630093N05Rik, CDC2-RELATED KINASE, CDKN2, Cyclin A associated kinase, CYCLIN E ASSOCIATED KINASE, cyclin-dependent kinase 2, p33(CDK2)                                                                                                                                                                                                                                           |
| CDKN1B          | AA408329, A1843786, Cdk11b, CDKN4, cyclin-dependent kinase inhibitor 1B, CYCLIN-DEPENDENT KINASE INHIBITOR P27, KIP1, MEN4, MEN1B, p27, P27KIP1, P27kip, P28-ICK                                                                                                                                                                                                                  |
| CIP2A           | AA408511, AU018569, C330027C09, C330027C09Rik, cell proliferation regulating inhibitor of protein phosphatase 2A, cellular inhibitor of PP2A, KIAA1524, p90, RGD1310335                                                                                                                                                                                                           |
| CK2             | Casein Kinase II, CKII                                                                                                                                                                                                                                                                                                                                                            |
| CSK             | AW212630, c-src tyrosine kinase, C-terminal Src kinase, p50CSK                                                                                                                                                                                                                                                                                                                    |
| ELK1            | ELK, ELK1, member of ETS oncogene family, ETS transcription factor ELK1, p62TCF, RGD:2549, TCF/ELK                                                                                                                                                                                                                                                                                |
| FBXO38          | 6030410I24RIK, AU044865, AW214031, F-box protein 38, Fbx38, FLJ13962, HMN2D, MOKA, SP329                                                                                                                                                                                                                                                                                          |
| FOXP3           | AlID, DIETER, Forkhead box P3, FOXP3A, IPEX, JM2, PIDX, RGD1562112, scurfir, sf, XPID                                                                                                                                                                                                                                                                                             |
| GSK3B           | 7330414F15Rik, 8430431H08Rik, C86142, glycogen synthase kinase 3 beta, glycogen synthase kinase 3 $\beta$ , GSK-3, GSK-3beta, GSK-3 $\beta$ , GSKbeta, GSK $\beta$ , Tpk1                                                                                                                                                                                                         |
| IFN $\gamma$    | IFG, IFI, IFN-2, IFNG2, IFN gamma, IFN-II, IFN type II, IFN- $\gamma$ , INF- $\gamma$ , Interferon gamma, Interferon $\gamma$ , type II INTERFERON, $\gamma$ -ifn, $\gamma$ interferon                                                                                                                                                                                            |
| IFN $\gamma$ R1 | CD119, Ifgr, IFN-gammaR, IFN gamma R alpha, IFN-gamma receptor, IFNGR, Ifngra, IFNR, IFN $\gamma$ R, IFN $\gamma$ R1, IFN- $\gamma$ receptor, IFN $\gamma$ Ra, IMD27A, IMD27B, interferon gamma receptor 1, INTERFERON gamma receptor alpha CHAIN, interferon $\gamma$ receptor, interferon $\gamma$ receptor 1, INTERFERON $\gamma$ receptor $\alpha$ CHAIN, MAF receptor, Nktar |
| IFN $\gamma$ R2 | AF-1, IFGR2, Ifgt, IFNgamma Rbeta, IFNGRB, IFNGT1, IFN $\gamma$ R2, IFN $\gamma$ R $\beta$ , IMD28, interferon gamma receptor 2, interferon $\gamma$ receptor 2                                                                                                                                                                                                                   |
| IFN $\gamma$ R  | IFN-gammaR, IFN-gamma receptor, Ifn type ii receptor, IFN $\gamma$ R, IFN- $\gamma$ receptor, Receptors Activated by Interferon-gamma, Receptors Activated by Interferon- $\gamma$ , type II IFN receptor                                                                                                                                                                         |
| IL12            | interleukin-12                                                                                                                                                                                                                                                                                                                                                                    |
| IL2             | interleukin 2, lymphokine, TCGF                                                                                                                                                                                                                                                                                                                                                   |
| IL2R            | Il2 Receptor                                                                                                                                                                                                                                                                                                                                                                      |
| IL4             | BCGF, BCGF-1, BSF-1, Il4e12, interleukin 4                                                                                                                                                                                                                                                                                                                                        |
| JAK             | JAK kinase                                                                                                                                                                                                                                                                                                                                                                        |
| LAT             | IMD52, LAT1, linker for activation of T cells, p36-38, pp36                                                                                                                                                                                                                                                                                                                       |
| LATS            | LATS1/2, LATS 1 and 2                                                                                                                                                                                                                                                                                                                                                             |
| LCK             | Hck-3, IMD22, Lck1, LCK proto-oncogene, Src family tyrosine kinase, Lcktkr, LSK, Lskt, lymphocyte protein tyrosine kinase, p56Lck, pp58lck, YT16                                                                                                                                                                                                                                  |
| LCP2            | A1323664, BB161688, Lymphocyte cytosolic protein 2, m1Khoe, SLP-76, twm                                                                                                                                                                                                                                                                                                           |
| MHC1 $\beta$    | AS, B-4901, Bw-50, Bw-52, Bw-54, Bw-55, Bw-56, HLA-B27, HLA B7, HLAC, LOC7034010, major histocompatibility complex, class I, B, MHC 1-beta, MHC 1 $\beta$                                                                                                                                                                                                                         |
| MHC2 $\alpha$   | Mhc2 $\alpha$ , MHC II-alpha, MHC II alpha CHAIN, MHC II- $\alpha$ , MHC II $\alpha$ CHAIN                                                                                                                                                                                                                                                                                        |
| MHC2 $\beta$    | MHC 2beta, MHC 2 $\beta$ , MHC II-beta, MHC II beta CHAIN, MHC II $\beta$ CHAIN                                                                                                                                                                                                                                                                                                   |
| MHC 1 $\alpha$  | MHC 1-alpha, MHC 1- $\alpha$ , MHC CLASS I alpha, MHC CLASS I $\alpha$ , MHC I-alpha                                                                                                                                                                                                                                                                                              |
| MHC Class I     | HLA Class I, MHC-1                                                                                                                                                                                                                                                                                                                                                                |
| MHC Class II    | HLA Class II, MHC II                                                                                                                                                                                                                                                                                                                                                              |
| miR-21          | HSA-MIR-104, HSA-MIR-21, MI0000110, microRNA 21, microRNA 21a, MIR-021, Mir21a, MIRN21, miRNA21, mmu-mir-21, mmu-mir-21a, pre-mir-21, mo-mir-21                                                                                                                                                                                                                                   |
| PD-1            | B7H1, CD279, hPD-1, hPD-I, hSLE1, LOC100911478, Ly101, PD, PD-1, Pd-1 receptor, Pdc1, PhLP, programmed cell death 1, SLEB2                                                                                                                                                                                                                                                        |
| PD-L1           | A5300451.16RIK, B7-H, B7H1, CD274 antigen, CD274 molecule, hPD-L1, PD-L1, Pd1l, PDCD1L1, PDCD1LG1, RGD1566211                                                                                                                                                                                                                                                                     |
| PD-L2           | B7-DC, ba574F11.2, Btdc, CD273, F730015O22Rik, PDCD1L2, PD-L2, programmed cell death 1 ligand 2                                                                                                                                                                                                                                                                                   |
| PDCD4           | 197/15A, D19Ucla1, Dug, H731, Ma3, programmed cell death 4, Tis, Topoisomerase-inhibitor suppressed                                                                                                                                                                                                                                                                               |
| PI3K            | 1-phosphatidylinositol 3-kinase, 2.7.1.137, ATP:1-phosphatidyl-1D-myo-inositol 3-phosphotransferase, Phosphatidylinositol 3 kinase, phosphatidylinositol 3'-kinase, PI3-kinase, Ptdlns 3 Kinase, type III phosphoinositide 3-kinase, type I phosphatidylinositol kinase, Vps34p                                                                                                   |
| PIP3            | 1-phosphatidyl-1D-myo-inositol 3,4,5-trisphosphate, phosphatidylinositol-3,4,5-trisphosphate, phosphoinositide (3,4,5) P3, PI(3,4,5)P3, Plns(3,4,5)P3, PIP3, Ptdlns(3,4,5)P3                                                                                                                                                                                                      |
| PKC $\theta$    | A130035A12Rik, AW494342, nPKC-theta, nPKC- $\theta$ , PKC-0, PKcq, PKC-theta, PKC- $\theta$ , PRKCT, protein kinase C theta, protein kinase C, theta, protein kinase C $\theta$ , protein kinase C, $\theta$                                                                                                                                                                      |
| PLC $\gamma$ 1  | A1894140, CDED, NCKAP3, phospholipase C gamma 1, phospholipase C, gamma 1, phospholipase C- $\gamma$ -1, phospholipase C, $\gamma$ 1, PIPLC gamma, PI-PLCgamma1, PIPLC $\gamma$ , PI-PLC $\gamma$ 1, PLC1, PLC148, PLC Gamma, PLCgamma1, PLC-II, PLC $\gamma$ , PLC $\gamma$ 1, PPLCA                                                                                             |
| PTEN            | 10q23del, 2310035O07RIK, A130070J02Rik, A1463227, B430203M17RIK, BZS, CWS1, DEC, GLM2, MHAM, Mmac, MMAC1, MUTATED IN MULTIPLE ADVANCED CANCERS, mutated in multiple advanced cancers 1, phosphatase and tensin homolog, PTEN1, PTENbeta, TEP1                                                                                                                                     |
| RASGRP1         | CALDAG-GEFI, CALDAG-GEFII, IMD64, RASGRP, RAS guanyl releasing protein 1                                                                                                                                                                                                                                                                                                          |
| SHP-2           | 2700084A17RIK, AW536184, BPTP3, CFC, JMML, METCDS, MGC14433, Noonan syndrome 1, NS1, protein tyrosine phosphatase non-receptor type 11, protein tyrosine phosphatase, non-receptor type 11, PTP-1D, PTP2C, SAP-2, SHP-2, SH-PTP2, SH-PTP3, Src homology protein 2, SYP                                                                                                            |
| SKP2            | 4930500A04Rik, AC139209.1, cyclin A-associated kinase, FBL1, F-box protein Skp2, FBXL1, FLB1, FWD1, p45, p45Skp2, RGD1562456, S-PHASE KINASE-ASSOCIATED protein 2, S-phase kinase-associated protein 2 (p45)                                                                                                                                                                      |
| SMAD3           | AU022421, DKFZP586N0721, hMAD-3, HSPC193, HsT17436, JV15-2, LDS1C, LDS3, MAD3, MADH3, SMAD family member 3                                                                                                                                                                                                                                                                        |
| STAT5           | Mgf, STAT5                                                                                                                                                                                                                                                                                                                                                                        |
| TCR $\alpha$    | IMD7, PT alpha, PT $\alpha$ , T cell receptor alpha chain, T cell receptor alpha locus, T cell receptor $\alpha$ chain, T cell receptor $\alpha$ locus, TCRA, Tcralpha, TCR $\alpha$ , TRA@                                                                                                                                                                                       |
| TCR $\beta$     | RATTCB, RATTCBC1, TCB, TCBC1, T-cell receptor beta chain, T cell receptor beta locus, T-cell receptor $\beta$ chain, T cell receptor $\beta$ locus, TCRB, TCRbeta, TCR $\beta$ , Tib, TRB@                                                                                                                                                                                        |
| TGF $\beta$     | TGF $\beta$ , TGF-beta 1, 2, and 3, TGF- $\beta$ 1, 2, and 3, Tgfb, transforming growth factor- $\beta$                                                                                                                                                                                                                                                                           |
| TNFR            | member of the tumour necrosis factor receptor family, TNFR, TNF R1, Tnf receptor superfamily, tumour necrosis factor receptor                                                                                                                                                                                                                                                     |
| TNF $\alpha$    | AT-TNF, DIF, RATTNF, TMTNF, TNF-a, TNF-alpha, Tnfsf1a, TNFSF2, TNF- $\alpha$ , TNLG1F, tumor necrosis factor, Tumor Necrosis Factor $\alpha$ , tumor necrosis factor, $\alpha$ , tumour necrosis factor, tumour Necrosis Factor Alpha, tumour necrosis factor, alpha, tumour Necrosis Factor $\alpha$ , tumour necrosis factor, $\alpha$                                          |
| Tra@-Trb@       | alpha/beta TCR, TCR, TCRalpha-beta, TCRalpha- $\beta$ , $\alpha/\beta$ TCR                                                                                                                                                                                                                                                                                                        |
| YAP             | A1325207, COB1, YAP, Yap2, YAP65, Yes1 associated transcriptional regulator, yes-associated protein 1, YKI, Yorkie                                                                                                                                                                                                                                                                |
| ZAP70           | ADMIO2, IMD48, mrtle, mur, SRK, STCD, STD, TZK, zeta chain of T cell receptor associated protein kinase 70, zeta-chain (TCR) associated protein kinase, $\zeta$ chain of T cell receptor associated protein kinase 70, $\zeta$ -chain (TCR) associated protein kinase                                                                                                             |



# Pathway Analysis Using IPA Software; canonical pathway

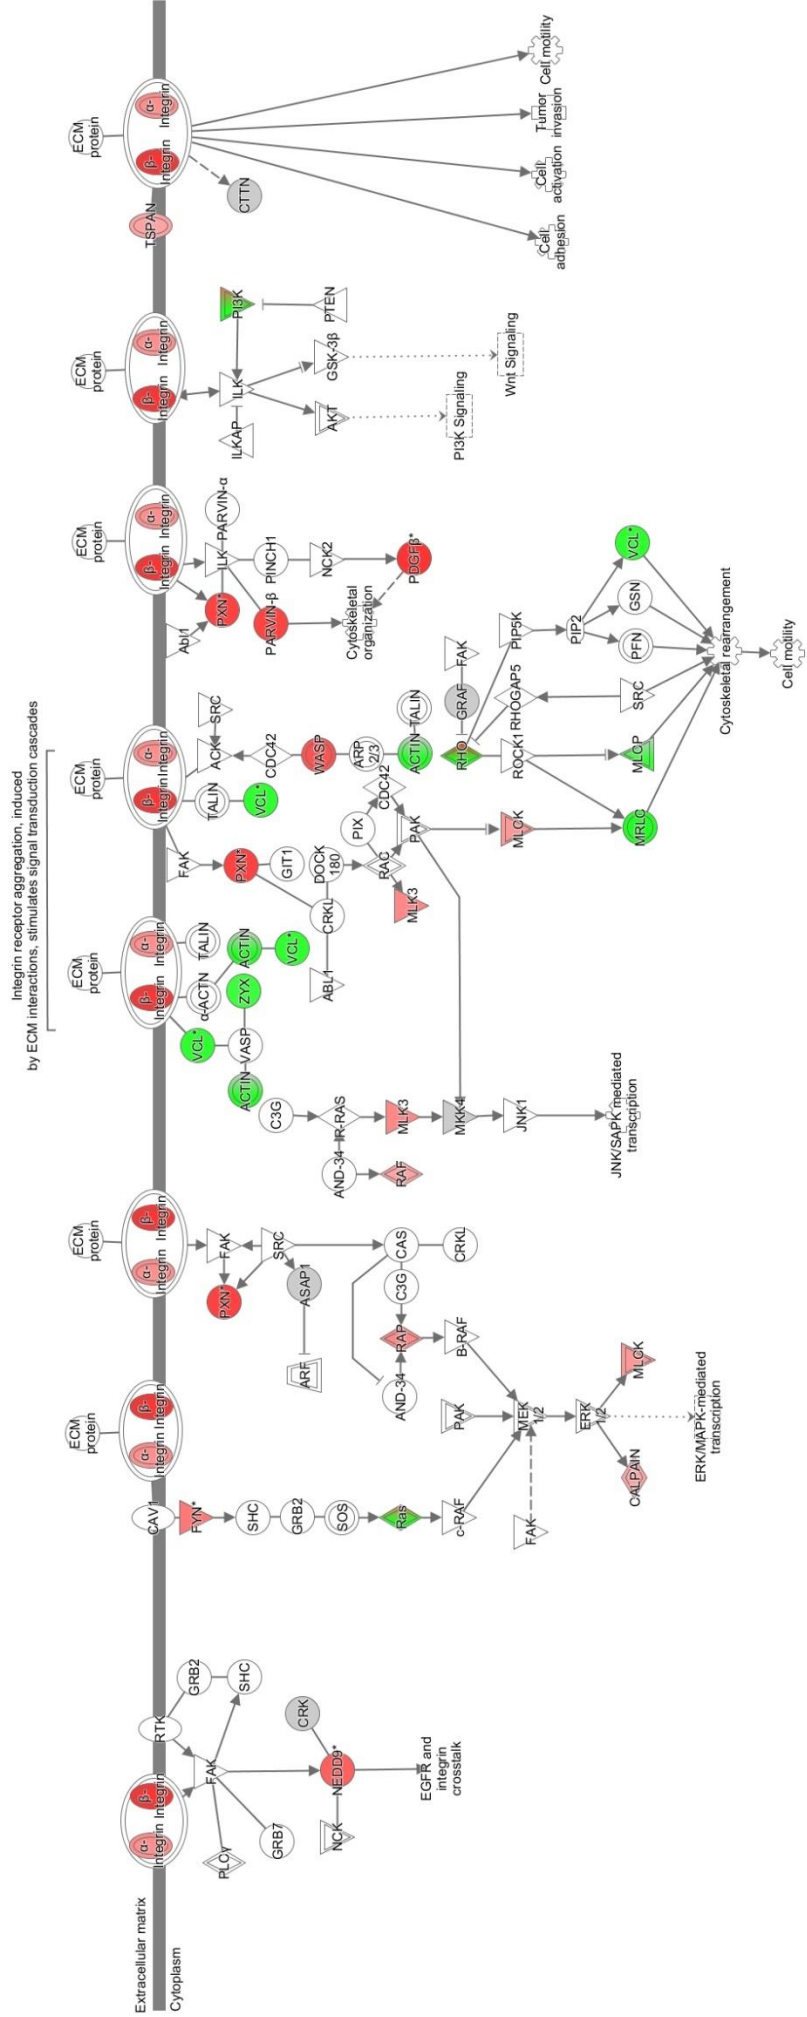

Figure S43. Integrin Signaling at 6 h

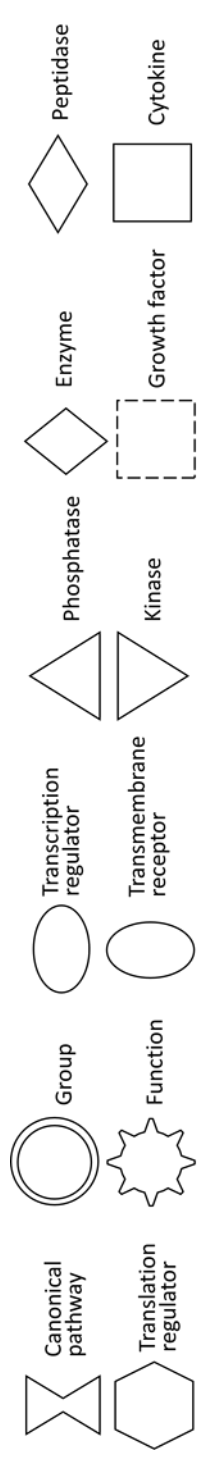

Red: Increased, FDR<0.05 versus control

Green: Decreased, FDR<0.05 versus control



| Symbol        | Synonym(s)                                                                                                                                                                                                                                                                                                                                                                                                                            |
|---------------|---------------------------------------------------------------------------------------------------------------------------------------------------------------------------------------------------------------------------------------------------------------------------------------------------------------------------------------------------------------------------------------------------------------------------------------|
| ABL1          | ABL, ABL proto-oncogene 1, non-receptor tyrosine kinase, A1325092, BCR-ABL, c-A, c-ABL, CABL1, c-abl oncogene 1, non-receptor tyrosine kinase, CHDSKM, E430008G22Rik, JTK7, LOC100909750, p145Abl, p150, tyrosine-protein kinase ABL1-like, v-abl                                                                                                                                                                                     |
| ACTIN         | CLEC9A Ligand, G-actin                                                                                                                                                                                                                                                                                                                                                                                                                |
| AKT           | AKT1/2/3, B/Akt, PKB, RAC-PK                                                                                                                                                                                                                                                                                                                                                                                                          |
| Alphaactinin  | ACTININ, Actinin alpha, Actinin $\alpha$ , ACTN, $\alpha$ -Actinin, $\alpha$ Actinin human                                                                                                                                                                                                                                                                                                                                            |
| Alphaintegrin | Adhesion Receptors, alpha-Integrin, CD11, Cd11b/c, Integrin alpha, $\alpha$ -Integrin                                                                                                                                                                                                                                                                                                                                                 |
| ARHGAP26      | 1810044B20Rik, 2610010G17Rik, 4933432P15Rik, A1853435, GRAF, GRAF1, GTPASE REGULATOR ASSOCIATED with FOCAL ADHESION KINASE PP125(FAK), mKIAA0621, OLIGOPHRENIN-1 LIKE, OPHN1L, OPHN1L1, Rho GTPase activating protein 26                                                                                                                                                                                                              |
| ARHGAP5       | AU014947, GF12, LRRGT00098, p190-, p190-B, p190BRhoGAP, p190Rhogap, p190RhoGAP-B, RhoGAP5, Rho GTPase Activating Protein 5                                                                                                                                                                                                                                                                                                            |
| ARHGEF7       | beta1PIX, betaPi, BETA-PIX, betaPix-b, betaPix-c, Beta-Pix Cool, C, coo, Cool, COOL-1, mKIAA0142, Nbla10314, P, P50, P50BP, p8, P85, P85 beta pix, P85COOL1, P85SPR, P85 $\beta$ pix, PAK3, Pak3bp, PAK-INTERACTING EXCHANGE FACTOR beta, PAK-INTERACTING EXCHANGE FACTOR $\beta$ , PIX, PIBX, Rho guanine nucleotide exchange factor 7, Rho guanine nucleotide exchange factor (GEF7), $\beta$ -PIX $\beta$ Pix-a, $\beta$ -Pix Cool |
| Arp2-3        | Arp, Arp2-3, ARP2-3 (Actin-related protein complex), Arp Complex                                                                                                                                                                                                                                                                                                                                                                      |
| ASAP1         | AMAP1, ArfGAP with SH3 domain, ankyrin repeat and PH domain 1, AV239055, CENTB4, DDEF1, DEF-1, LOC100039024, mKIAA1249, PAG2, PAP, s19, ZG14P                                                                                                                                                                                                                                                                                         |
| BCAR1         | A1385681, BCAR1 scaffold protein, Cas family member, breast cancer anti-estrogen resistance 1, C, CAS, CAS1, CASS1, Cr, CRKAS, LOC100131601, p130, P130CAP, P130CAS                                                                                                                                                                                                                                                                   |
| BCAR3         | A1131758, AND-, AND-34, BCAR3 adaptor protein, NSP family member, breast cancer anti-estrogen resistance 3, LOC101928013, MIG7, NSP2, RP11 488P31, SH2D3B                                                                                                                                                                                                                                                                             |
| Betaintegrin  | beta-Integrin, Integrin beta, $\beta$ -Integrin                                                                                                                                                                                                                                                                                                                                                                                       |
| BRAF          | 9930012E13Rik, AA120551, AA387315, AA473386, A1447469, Bra, B-RAF1, Braf-2, B-Raf proto-oncogene, serine/threonine kinase, Braf transforming gene, C230098H17, C87398, D6Erd631, D6Erd631e, NS7, RAFB, RAFB1                                                                                                                                                                                                                          |
| CALPAIN       | CALCIUM DEPENDENT PROTEASE, M calpain                                                                                                                                                                                                                                                                                                                                                                                                 |
| CAV1          | BSCL3, Cav, cave, Cavelolin 1, CAVEOLIN, Caveolin1, caveolin 1, caveolae protein, CGL3, LCCNS, LOC100362870, MSTP085, PPH3, VIP21                                                                                                                                                                                                                                                                                                     |
| CDC42         | A1747189, AU018915, CDC42Hs, cell division cycle 42, CELLULAR GROWTH REGULATING, G25K, TKS                                                                                                                                                                                                                                                                                                                                            |
| CRK           | c-Crk, c-Crk2, Cr, CRK2, Crko, CRK proto-oncogene, adaptor protein, FLJ11558, p38, v-crk avian sarcoma virus CT10 oncogene homolog                                                                                                                                                                                                                                                                                                    |
| CRKL          | 1110025F07Rik, AA589403, A1325100, Cr, crk-like protein-like, CRK like proto-oncogene, adaptor protein, Crkol, LOC100911248, mgc94609, snoop, v-crk avian sarcoma virus CT10 oncogene homolog-like                                                                                                                                                                                                                                    |
| CTTN          | 1110020L01Rik, amplixin, Cortactin, Ctnnb, Ems, EMS1                                                                                                                                                                                                                                                                                                                                                                                  |
| DOCK1         | 9130006G06Rik, A1854900, b2b3190C, b2b3190Clo, ced5, D630004B07Rik, dedicator of cyto-kinesis 1, Dock18, DOCK180, LOC679295, RGD1566072                                                                                                                                                                                                                                                                                               |
| ERK1/2        | MAPK p44/42, MAPK p44/p42, p42/44 mapk, P42/p44 erk, P42/p44 mapk, p42/p44 MAP KINASE                                                                                                                                                                                                                                                                                                                                                 |
| FYN           | A1448320, AW552119, C-FYN, Fyn proto-oncogene, FYN proto-oncogene, Src family tyrosine kinase, FYNT, LOC102724705, p59-FYN, p59 Fyn B, SLK, SRC-LIKE KINASE, SYN                                                                                                                                                                                                                                                                      |
| GIT1          | Cat-, Cat-1, GIT ArfGAP 1, p95C, p95Cat                                                                                                                                                                                                                                                                                                                                                                                               |
| GRB2          | AA408164, ASH, Ash-psi, EGFRBP-GRB2, GRAB2, GRBS, growth factor receptor bound protein 2, MST084, MSTP084, NCKAP2                                                                                                                                                                                                                                                                                                                     |
| GRB7          | growth factor receptor bound protein 7, mKIAA4028                                                                                                                                                                                                                                                                                                                                                                                     |
| GSK3B         | 7330414F15Rik, 8430431H08Rik, C86142, glycogen synthase kinase 3 beta, glycogen synthase kinase 3 $\beta$ , GSK-, GSK-3, GSK-3be, GSK-3beta, GSK-3 $\beta$ , GSKbeta, GSK $\beta$ , Tpk1                                                                                                                                                                                                                                              |
| GSN           | ADF, AGEL, Gelsolin, Gelsolin plasma isoform, LOC105376337                                                                                                                                                                                                                                                                                                                                                                            |
| ILK           | AA511515, ESTM2, ESTM24, HEL-S-28, ILK-1, ILK-2, integrin-linked kinase, P59, p59ILK                                                                                                                                                                                                                                                                                                                                                  |
| ILKAP         | 0710007A14Rik, 1600009O09Rik, AF095927, AK055417, ILKAP2, ILKAP3, ILK associated serine/threonine phosphatase, integrin-linked kinase-associated serine/threonine phosphatase 2C, PP2C-D, PP2C-DELTA, PP2C- $\delta$ , PPM1O                                                                                                                                                                                                          |
| Integrin      | Integrin alpha-beta, integrin-extracellular matrix, INTEGRIN receptor, Integrin $\alpha$ - $\beta$                                                                                                                                                                                                                                                                                                                                    |
| LIMS1         | 2310016J22Rik, 4921524A02Rik, A1507642, AU021743, AW551584, C430041B13Rik, Li, LIM and senescent cell antigen-like domains 1, LIM zinc finger domain containing 1, Lims11, PIN, PINCH, PINCH-1, RGD1560732                                                                                                                                                                                                                            |
| MAP2K1/2      | MEK1/2, MKK1/2                                                                                                                                                                                                                                                                                                                                                                                                                        |
| MAP2K4        | JNKK, JNKK1, MAPK/ERK KINASE-1, MAPKK4, MEK4, mitogen-activated protein kinase kinase 4, MKK4, PRKMK4, SAPKK-1, Sek, SEK1, Ser, SERK1, SKK1                                                                                                                                                                                                                                                                                           |
| MAP3K11       | 2610017K16Rik, MEKK11, mitogen-activated protein kinase kinase kinase 11, Mlk, MLK-3, PTK1, RHOE, SPRK                                                                                                                                                                                                                                                                                                                                |
| MAPK8         | A1849689, C-JUN N-TERMINAL KINASE1, JNK, JNK1, JNK1A2, JNK21B1/2, JNK-46, mitogen-activated protein kinase 8, p46JNK1, p46JNK1 alpha, p46JNK1 $\alpha$ , Prk, PRKM8, SAPK1, SAPK1c, Sapk gamma, SAPK P46, Sapk $\gamma$ , STRESS-ACTIVATED protein KINASE-LIKE KINASE                                                                                                                                                                 |
| MLCP          | 3.1.3.53, Myosin-bound phosphatase, myosin light chain kinase phosphatase, myosin-light-chain-phosphatase, [myosin-light-chain]-phosphate phosphohydrolase, Myosin Phosphatase, Myosin PPTase, MYPT, protein phosphatase 2A                                                                                                                                                                                                           |
| MRLC          | Myosin subunit regulatory light chain, Rlc                                                                                                                                                                                                                                                                                                                                                                                            |
| Mylik         | MLCK, Mylk                                                                                                                                                                                                                                                                                                                                                                                                                            |
| NCK           | NCK alpha,beta, NCK $\alpha$ , $\beta$                                                                                                                                                                                                                                                                                                                                                                                                |
| NCK2          | 4833426I10Rik, Grb, GRB4, LOC100503894, NCK adaptor protein 2, NCKbe, NCKbeta, Nck $\beta$ , non-catalytic region of tyrosine kinase adaptor protein 2                                                                                                                                                                                                                                                                                |
| NEDD9         | C, Ca, CAS2, CAS-L, CASS2, enhancer of filamentation 1, HEF1, MEF1, neural precursor cell expressed, developmentally down-regulated 9, neural precursor cell expressed, developmentally down-regulated gene 9, p105, P105hef1                                                                                                                                                                                                         |
| PARVA         | 2010012A22Rik, 5430400F08Rik, act, Actopaxin, Actp, A1225929, alpha PARVIN, AU042898, CH-IL, CH-ILKBP, MXRA2, Parvin, parvin, alpha, parvin, $\alpha$ , Parvin-alpha, Parvin- $\alpha$ , $\alpha$ PARVIN                                                                                                                                                                                                                              |
| PARVB         | aff, affixin, A1595373, AW742462, CGI-56, D15Gsk1, D15Gsk, parvin, beta, parvin, $\beta$ , Parvin-beta, Parvin- $\beta$                                                                                                                                                                                                                                                                                                               |
| PDGFB         | c-sis, IBGCS, PDGF-, PDGF-2, PDGF-BB, PDGF beta, PDGFbetaR, Pdgfrb, PDGFRbeta, PDGF- $\beta$ , platelet derived growth factor, B polypeptide, platelet derived growth factor subunit B, SIS, SSV                                                                                                                                                                                                                                      |
| PI3K          | 1-phosphatidylinositol 3-kinase, 2.7.1.137, ATP:1-phosphatidyl-1D-myo-inositol 3-phosphotransferase, Phosphatidylinositol 3 kinase, phosphatidylinositol 3'-kinase, PI3-kinase, PtdIns 3 Kinase, type III phosphoinositide 3-kinase, type I phosphatidylinositol kinase, Vps34p                                                                                                                                                       |
| PIKFYVE       | 5230400C17Rik, CFD, FAB1, HEL37, KIAA0981, P, p235, phosphoinositide kinase, FYVE-type zinc finger containing, PI5K, Pip, PIP5K, PIP5K3, Pipk5k3, PipkIII, Type III PI 5-kinase, ZFYVE29                                                                                                                                                                                                                                              |
| PIP2          | C11H19O19P3R2, phosphatidylinositol-4,5-bisphosphate, phosphatidyl-myo-inositol 4,5-bisphosphate, PI(4,5)P2, PI4,5P2, PIP2, PtdIns(4,5)P2                                                                                                                                                                                                                                                                                             |
| PLC-gamma     | Phospholipase C gamma, Phospholipase C $\gamma$ , PLCG, PLC $\gamma$                                                                                                                                                                                                                                                                                                                                                                  |
| Profilin      | PFN                                                                                                                                                                                                                                                                                                                                                                                                                                   |
| PTEN          | 10q23del, 2310035O07Rik, A130070J02Rik, A1463227, B430203M17Rik, BZS, CWS1, DEC, GLM2, MHAM, MMAC, MMAC1, MUTATED IN MULTIPLE ADVANCED CANCERS, mutated in multiple advanced cancers 1, phosphatase and tensin homolog, PTEN1, PTENbeta, TEP, TEP1                                                                                                                                                                                    |
| PTK2          | FA, Fad, FADK, FADK 1, FAK, FAK1, FAK related non-kinase, FR, p125FAK, pp125FAK, PPP1R71, protein tyrosine kinase 2, PTK2 protein tyrosine kinase 2, TYROSINE KINASE 2                                                                                                                                                                                                                                                                |
| PXN           | AW108311, AW123232, FLJ23042, P, PAX, PAXILLIN                                                                                                                                                                                                                                                                                                                                                                                        |
| RAF1          | 6430402F14Rik, AA990557, BB129353, CMD1NN, c-R, Cra, CRAF, Cra1, D830050J10Rik, leukaemia ONCOGENE HOMOLOG1, LEUKEMIA ONCOGENE HOMOLOG1, NS5, Raf-1 proto-oncogene, serine/threonine kinase, v-, v-Raf, v-rafHeukaemia viral oncogene 1, v-rafLeukemia viral oncogene 1                                                                                                                                                               |
| Ral           | Ral A/B                                                                                                                                                                                                                                                                                                                                                                                                                               |
| RAPGEF1       | 4932418O06Rik, C3G, C3G-1, C3G-2, Grf, GRF2, Rap guanine nucleotide exchange factor 1, Rap guanine nucleotide exchange factor (GEF) 1                                                                                                                                                                                                                                                                                                 |
| RHO           | GTPase Rho, Rho, Rho Family, RHO-GTPASE, Rho-like Gtpase                                                                                                                                                                                                                                                                                                                                                                              |
| ROCK1         | 1110055K06Rik, LOC100129157, P160ROCK, p160 ROCK-1, Rho-associated coiled-coil containing protein kinase 1, Roc, ROCK, ROCK-I, ROK, ROK beta, ROK $\beta$                                                                                                                                                                                                                                                                             |
| RRAS          | A1573426, p23, R, RAS related, related RAS viral (r-ras) oncogene, Rras1, Rras predicted                                                                                                                                                                                                                                                                                                                                              |
| SHC1          | p52SHC, p6, p66, p66s, P66shc, Sh, SHC, Shc (46 kDa isoform), SHCA, SHC adaptor protein 1, Shc p66 isoform, src homology 2 domain-containing transforming protein C1                                                                                                                                                                                                                                                                  |
| SRC           | ASV, AW259666, BS27, c-SRC, p60-Src, PP60, pp60c, Pp60/c-Src, pp60c-src, Rous sarcoma oncogene, SRC1, SRC proto-oncogene, non-receptor tyrosine kinase, THC6, TVHUSC                                                                                                                                                                                                                                                                  |
| TALIN         | TLN                                                                                                                                                                                                                                                                                                                                                                                                                                   |
| TNK2          | Ac, ACK, ACK1, Cdgip, LOC682784, p21cdc42Hs, Pyk, Pyk1, tyrosine kinase non receptor 2, tyrosine kinase, non-receptor, 2                                                                                                                                                                                                                                                                                                              |
| TSPAN         | TETRASPAN, TRANSMEMBRANE 4 SUPERFAMILY                                                                                                                                                                                                                                                                                                                                                                                                |
| VASP          | vasodilator-stimulated phosphoprotein                                                                                                                                                                                                                                                                                                                                                                                                 |
| VCL           | 9430097D22, AA571387, A1462105, AW545629, CMD1W, CMH15, HEL114, MV, MVCL, Vcl predicted, Vinculin                                                                                                                                                                                                                                                                                                                                     |
| ZYX           | 9530098H06Rik, ESP-2, HED-2, R7515, R75157, ZIXN, Zyxin                                                                                                                                                                                                                                                                                                                                                                               |

# Pathway Analysis Using IPA Software; canonical pathway

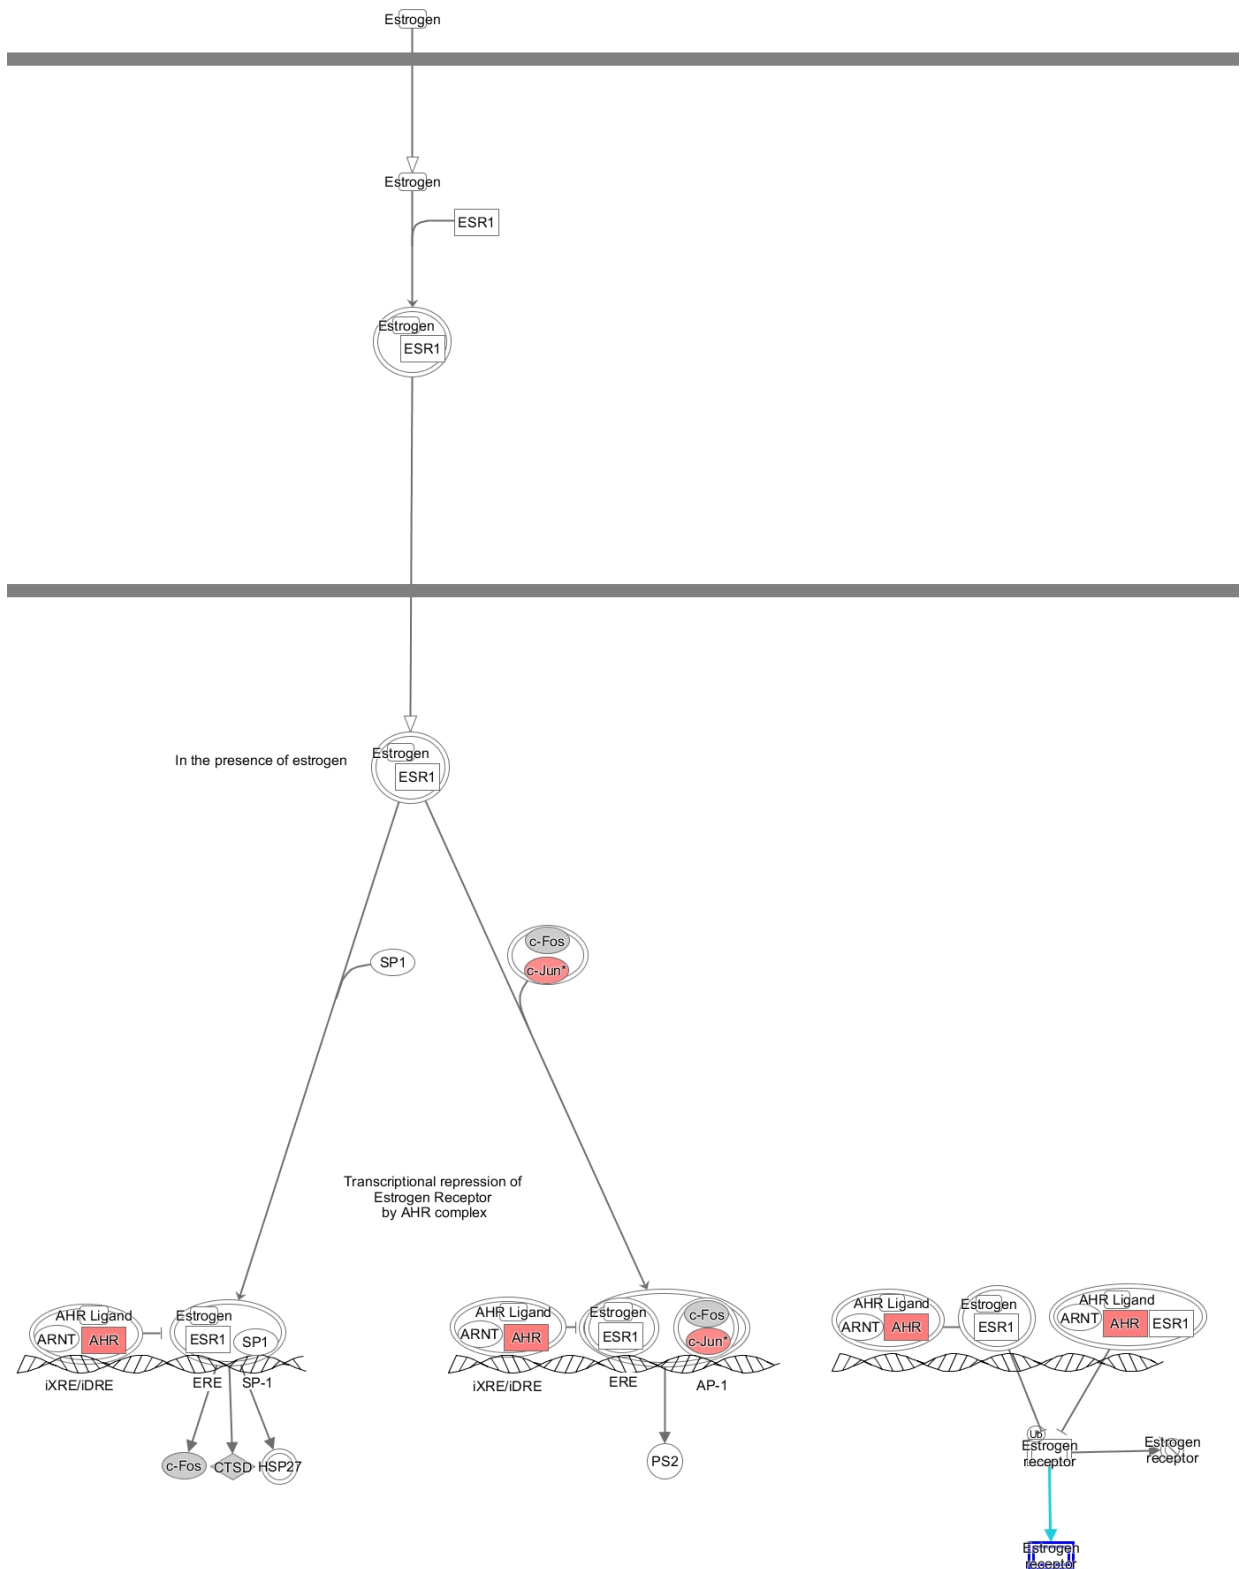

Figure S44. Aryl Hydrocarbon Receptor Signaling at 6 h

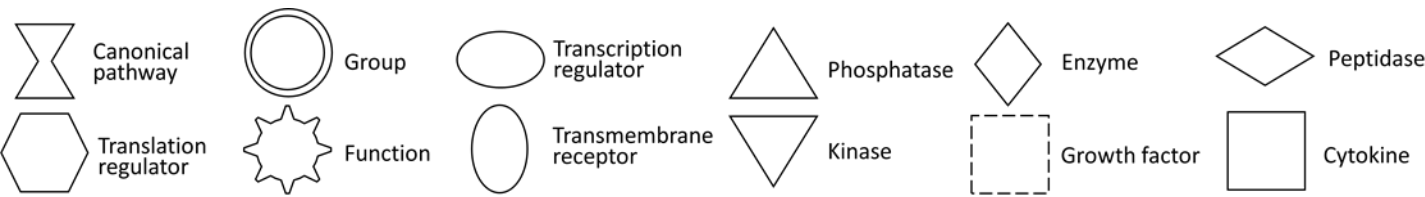

Red: Increased, FDR<0.05 versus solvent control

Green: Decreased, FDR<0.05 versus solvent control

# Pathway Analysis Using IPA Software; canonical pathway

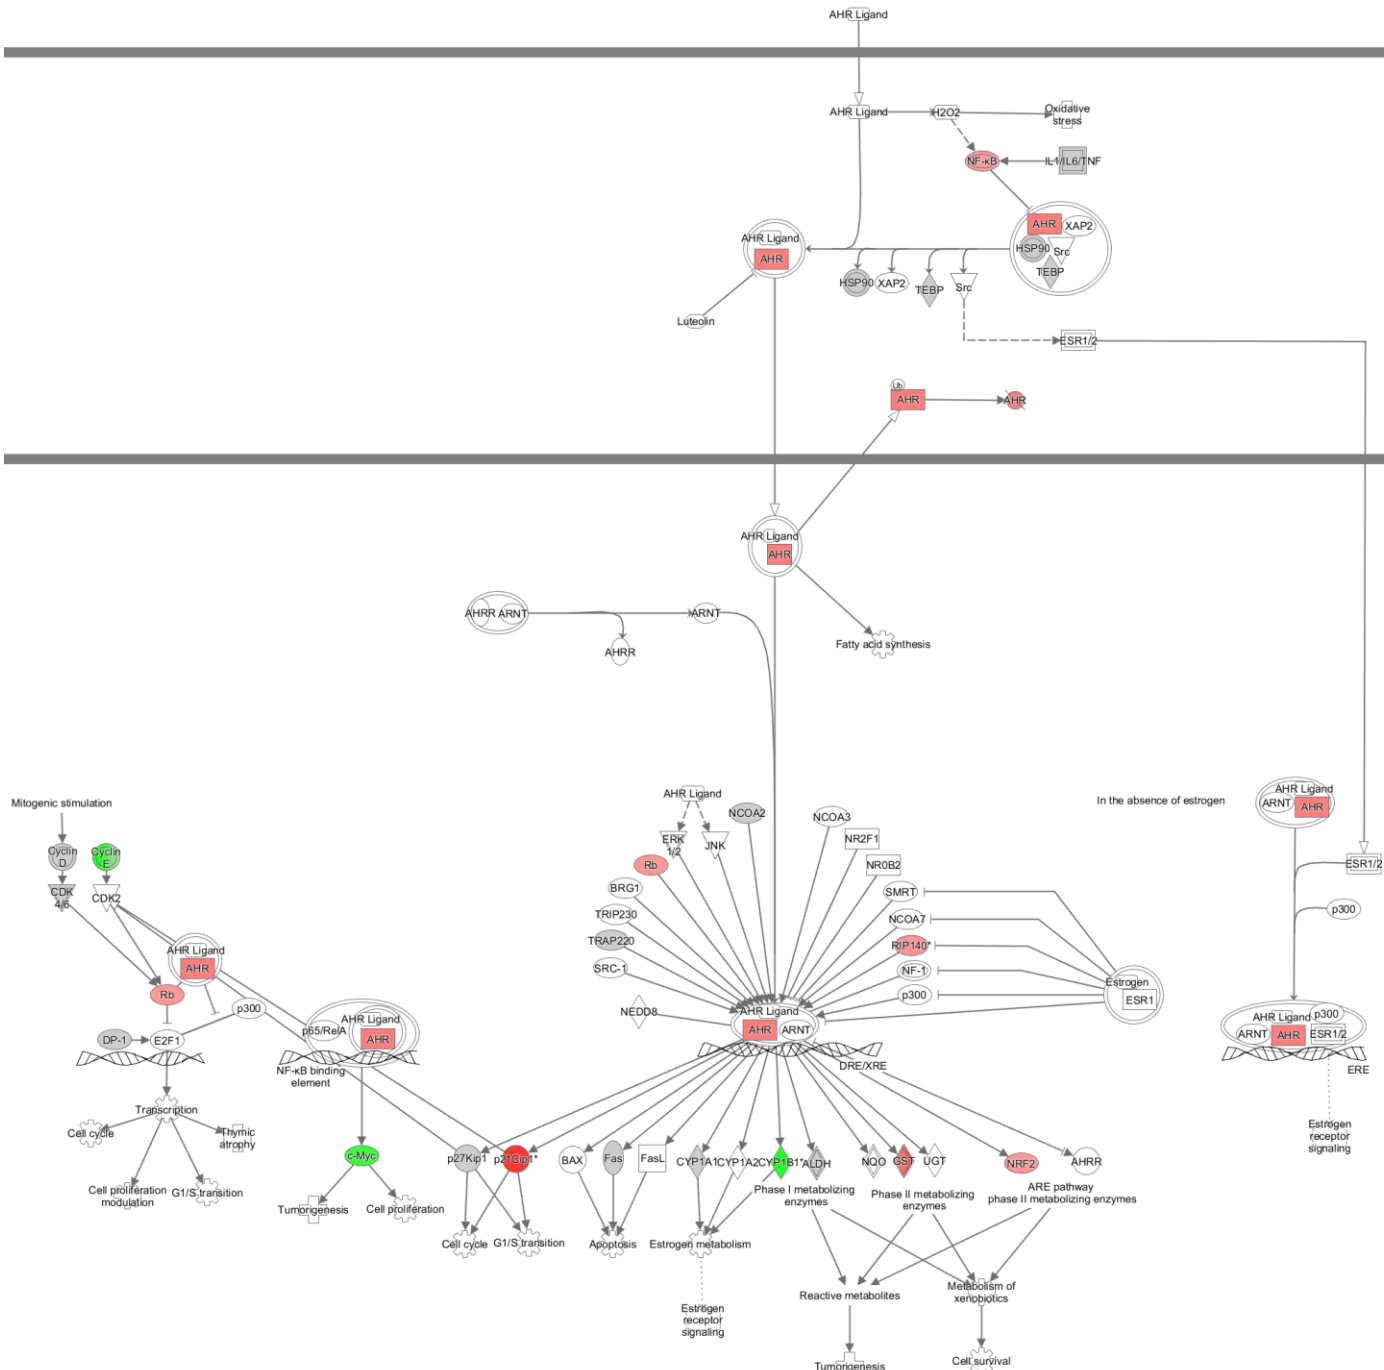

Figure S44. Aryl Hydrocarbon Receptor Signaling at 6 h (continued)

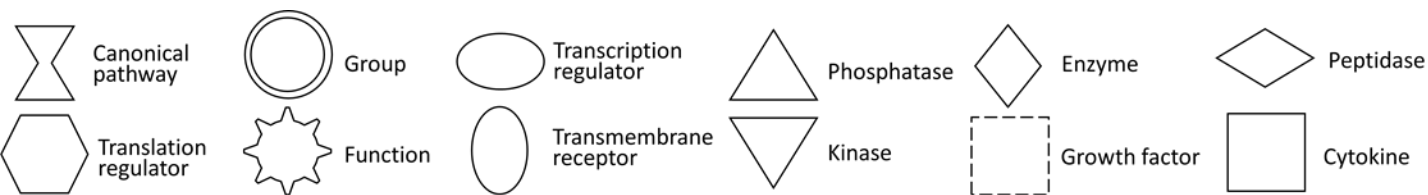

Red: Increased, FDR<0.05 versus solvent control

Green: Decreased, FDR<0.05 versus solvent control

# Pathway Analysis Using IPA Software; canonical pathway

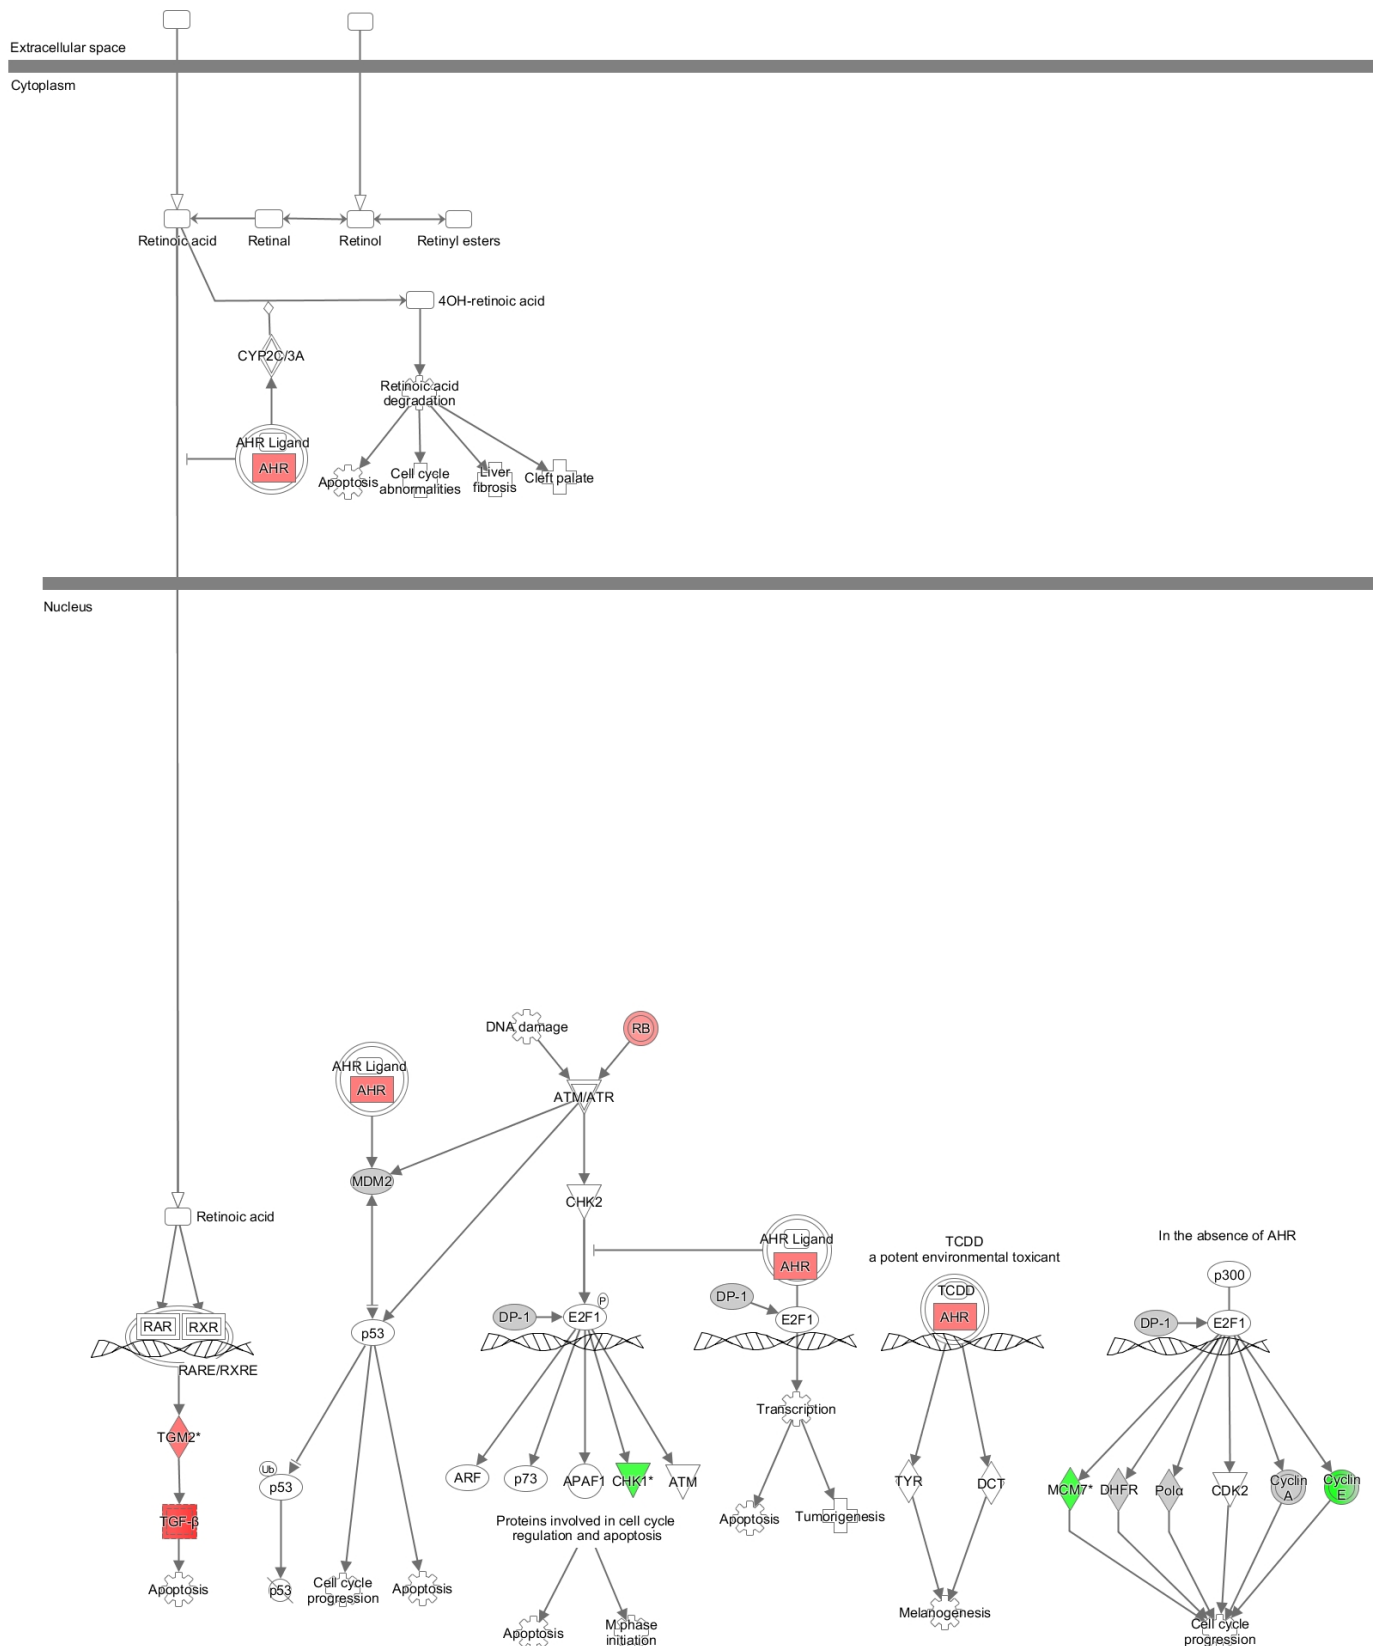

Figure S44. Aryl Hydrocarbon Receptor Signaling at 6 h (continued)

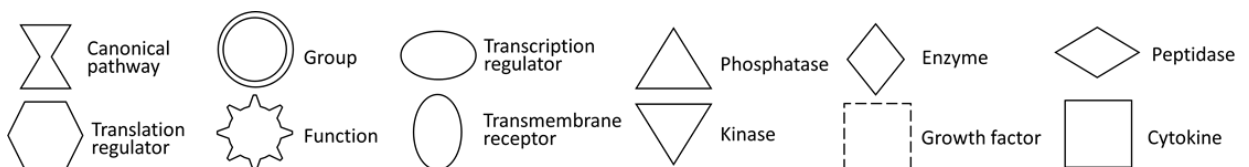

Red: Increased, FDR<0.05 versus solvent control

Green: Decreased, FDR<0.05 versus solvent control

| Symbol            | Synonym(s)                                                                                                                                                                                                                                                                                                                                                                                                                                                                                                                                                                                                                                                                                                                                                                                                  |
|-------------------|-------------------------------------------------------------------------------------------------------------------------------------------------------------------------------------------------------------------------------------------------------------------------------------------------------------------------------------------------------------------------------------------------------------------------------------------------------------------------------------------------------------------------------------------------------------------------------------------------------------------------------------------------------------------------------------------------------------------------------------------------------------------------------------------------------------|
| 4OH-retinoic acid | (2E,4E,6E,8E)-9-(3-hydroxy-2,6,6-trimethylcyclohexen-1-yl)-3,7-dimethylnona-2,4,6,8-tetraenoic acid, 4OH-retinoic acid, 66592-72-1, C20H28O3                                                                                                                                                                                                                                                                                                                                                                                                                                                                                                                                                                                                                                                                |
| AHR               | A, Ah, Ahh, Ahre, AH receptor, aryl-hydrocarbon receptor, bHLHe7, bHLHe76, DIOXIN receptor, In, RP85                                                                                                                                                                                                                                                                                                                                                                                                                                                                                                                                                                                                                                                                                                        |
| AHR Ligand        | AHR ligand, aromatic hydrocarbon                                                                                                                                                                                                                                                                                                                                                                                                                                                                                                                                                                                                                                                                                                                                                                            |
| AHRR              | AHH, AHHR, aryl-hydrocarbon receptor repressor, bHLHe77, mKIAA1234                                                                                                                                                                                                                                                                                                                                                                                                                                                                                                                                                                                                                                                                                                                                          |
| AIP               | A, AA408703, ARA9, aryl-hydrocarbon receptor-interacting protein, AW476050, D19Bwg1412e, Fkbp1, FKBP16, FKBP37, PITA1, SMTPHN, Xa, XAP-2                                                                                                                                                                                                                                                                                                                                                                                                                                                                                                                                                                                                                                                                    |
| ALDH              | ALDEHYDE DEHYDROGENASE                                                                                                                                                                                                                                                                                                                                                                                                                                                                                                                                                                                                                                                                                                                                                                                      |
| Ap1               | activator protein-1, c-Jun                                                                                                                                                                                                                                                                                                                                                                                                                                                                                                                                                                                                                                                                                                                                                                                  |
| APAF1             | 6230400I06RIK, Ap, Apaf1, apoptotic peptidase activating factor 1, CED4, fog, mKIAA0413                                                                                                                                                                                                                                                                                                                                                                                                                                                                                                                                                                                                                                                                                                                     |
| ARNT              | Arnt1, aryl hydrocarbon receptor nuclear translocator, bHLHe, bHLHe2, D3Ertd557, D3Ertd557e, DIOXIN receptor, Dmt, ESTM4, ESTM42, Hif1, HIF1B, HIF1BETA, HIF-1-β, HIF beta, HIF β, mKIAA4051, TANGO, W08714                                                                                                                                                                                                                                                                                                                                                                                                                                                                                                                                                                                                 |
| ATM               | A1256621, AT1, ATA, ataxia telangiectasia mutated, ATC, ATD, ATDC, ATE, ATM serine/threonine kinase, C030026E19RIK, TEL1, TELO1                                                                                                                                                                                                                                                                                                                                                                                                                                                                                                                                                                                                                                                                             |
| ATM/ATR           | ATR/ATM                                                                                                                                                                                                                                                                                                                                                                                                                                                                                                                                                                                                                                                                                                                                                                                                     |
| BAX               | Bcl2-associated X, BCL2 associated X, apoptosis regulator, BCL2-associated X protein, BCL2L4                                                                                                                                                                                                                                                                                                                                                                                                                                                                                                                                                                                                                                                                                                                |
| CDK2              | A630093N05RIK, CDC2-RELATED KINASE, CDKN2, Cyclin A associated kinase, cyclin-dependent kinase 2, CYCLIN E ASSOCIATED KINASE, p33(CDK2)                                                                                                                                                                                                                                                                                                                                                                                                                                                                                                                                                                                                                                                                     |
| CDKN1A            | CAP, CAP20, CDK, CDK1, Cdkn, CDKN1, CDKN1A, CI, Cip1, cyclin-dependent kinase inhibitor 1A, cyclin-dependent kinase inhibitor 1A (P21), mdm, MDA-6, P2, P21, p21C, p21Cip, p21CIP1, p21W, p21WAF, p21Waf1, P21 Cyclin-Dependent Kinase Inhibitor, SD, SD1, UV96, Waf, WAF1                                                                                                                                                                                                                                                                                                                                                                                                                                                                                                                                  |
| CDKN1B            | AA408329, A1843786, Cdk1b, CDKN4, cyclin-dependent kinase inhibitor 1B, CYCLIN-DEPENDENT KINASE INHIBITOR P27, KIP1, MEN1B, MEN4, p2, p27, p27K, P27kip, P27KIP1, P28-ICK                                                                                                                                                                                                                                                                                                                                                                                                                                                                                                                                                                                                                                   |
| CHEK1             | C85740, checkpoint kinase 1, CHK1, rad27                                                                                                                                                                                                                                                                                                                                                                                                                                                                                                                                                                                                                                                                                                                                                                    |
| CHEK2             | CDS1, Check2, checkpoint kinase 2, CHK2, hCds1, HUCDS1, LFS2, PP1425, Rad, RAD53                                                                                                                                                                                                                                                                                                                                                                                                                                                                                                                                                                                                                                                                                                                            |
| CTSD              | Cat, CATD, cathepsin D, Cathespin D, CD, CLN10, CPSD, EAI, HEL-S-130P, LOC196214                                                                                                                                                                                                                                                                                                                                                                                                                                                                                                                                                                                                                                                                                                                            |
| CyclinD           | CycD, Cyclin D1                                                                                                                                                                                                                                                                                                                                                                                                                                                                                                                                                                                                                                                                                                                                                                                             |
| CYP1A1            | AHH, AH Hydroxylase, AHRR, CP11, CYP1, Cyp45c, Cypc45c, CYP1A1, cytochrome P450 family 1 subfamily A member 1, cytochrome P450, family 1, subfamily a, polypeptide 1, EROD, P1-450, P450-, P450-1, P-450bmf-b, P450-C, P450DX, P450 IA1, P-450MC, P450-P1                                                                                                                                                                                                                                                                                                                                                                                                                                                                                                                                                   |
| CYP1A2            | CP1, CP12, CYPD45, CYP1A2, cytochrome P450 family 1 subfamily A member 2, cytochrome P450, family 1, subfamily a, polypeptide 2, P3-450, P450-, P450-3, P-450d, P450 IA2, P-450Isfg, P450-P3, P450(PA), RATCYPD45                                                                                                                                                                                                                                                                                                                                                                                                                                                                                                                                                                                           |
| CYP1B1            | ASGD6, CP1B, CYP1B1, cytochrome P450 family 1 subfamily B member 1, cytochrome P450, family 1, subfamily b, polypeptide 1, GLC3A, P4501B1, P450Rap                                                                                                                                                                                                                                                                                                                                                                                                                                                                                                                                                                                                                                                          |
| DCT               | dopachrome tautomerase, DT, LOC102724113, OCA8, RGD1564975, slaty, slit, TR, TRP, TRP-2, Tyr, Typr, TYRP2                                                                                                                                                                                                                                                                                                                                                                                                                                                                                                                                                                                                                                                                                                   |
| DHFR              | 8430436I03RIK, AA607882, A1662710, AW555094, Dhfr1, DHFR4, DHFRP1, dihydrofolate reductase, dihydrofolic acid reductase, DYR                                                                                                                                                                                                                                                                                                                                                                                                                                                                                                                                                                                                                                                                                |
| E2F1              | E2f, E2F transcription factor 1, mKIAA4009, RBAP1, RBBP3, RBP3, Tg(Wnt1-cre)2Sor                                                                                                                                                                                                                                                                                                                                                                                                                                                                                                                                                                                                                                                                                                                            |
| EP300             | A430090G16, A730011L11, E1A binding protein p300, KAT3, KAT3B, MKHK2, p30, p300, p300 HAT, RSTS2                                                                                                                                                                                                                                                                                                                                                                                                                                                                                                                                                                                                                                                                                                            |
| ERK1/2            | MAPK p44/42, MAPK p44/p42, p42/p44 erk, P42/p44 mapk, p42/p44 MAP KINASE                                                                                                                                                                                                                                                                                                                                                                                                                                                                                                                                                                                                                                                                                                                                    |
| ESR1              | Alpha estrogen receptor, E, ER-, ERa, ER-alpha, Er alpha (46 kDa isoform), ER-α, Er α (46 kDa isoform), Es, ESR, ESRA, Estr, Estra, estrogen receptor, estrogen receptor 1, estrogen receptor 1 (alpha), estrogen receptor 1 (α), Estrogen receptor α, ESTRR, Nr, NR3A1, RNESTROR, TERP-1, α estrogen receptor                                                                                                                                                                                                                                                                                                                                                                                                                                                                                              |
| Estrogen          | C18 steroids, oestrogen                                                                                                                                                                                                                                                                                                                                                                                                                                                                                                                                                                                                                                                                                                                                                                                     |
| Estrogenreceptor  | ER, ESR, ESR1/2, esr1/esr2                                                                                                                                                                                                                                                                                                                                                                                                                                                                                                                                                                                                                                                                                                                                                                                  |
| Estrogen-ER       | Esr1-Estrogen                                                                                                                                                                                                                                                                                                                                                                                                                                                                                                                                                                                                                                                                                                                                                                                               |
| FAS               | A196731, ALPS1A, AP, APO-1, APT1, CD95, CD95L, CD95 receptor, FAS1, FAS/APO1, Fas cell surface death receptor, FasR, FASTM, Fas (TNF receptor superfamily member 6), lpr, Receptor for Fas Ligand, Receptors for Fas Ligand, TNF, TNfr, TNFR6, Tnf receptor member 6, TNFRSF6                                                                                                                                                                                                                                                                                                                                                                                                                                                                                                                               |
| FASLG             | ALPS1B, AP11, APTL1G, APTL, CD178, CD95, CD95-L, F, Fa, FASL, Fas Ligand, Fas ligand (TNF superfamily, member 6), gld, mFasL, Tnfr16, Tnfs, TNFSF6, TNLG1A                                                                                                                                                                                                                                                                                                                                                                                                                                                                                                                                                                                                                                                  |
| FOS               | AP-1, c-f, C-FOS, D12Rfj, D12Rfj, FBJ oncosarcoma oncogene, Fos proto-oncogene, AP-1 transcription factor subunit, p55                                                                                                                                                                                                                                                                                                                                                                                                                                                                                                                                                                                                                                                                                      |
| GST               | Glutathione s-transferase, GSH Transferase                                                                                                                                                                                                                                                                                                                                                                                                                                                                                                                                                                                                                                                                                                                                                                  |
| H2O2              | 7722-84-1, A-101, Colgate Peroxyl, Eskata, H2O2, hydrogen dioxide, hydrogen peroxide, peroxy mouthwash, urea hydrogen peroxide                                                                                                                                                                                                                                                                                                                                                                                                                                                                                                                                                                                                                                                                              |
| HSP27             | Heat Shock Protein 27                                                                                                                                                                                                                                                                                                                                                                                                                                                                                                                                                                                                                                                                                                                                                                                       |
| HSP90             | HSC90, Hsp84                                                                                                                                                                                                                                                                                                                                                                                                                                                                                                                                                                                                                                                                                                                                                                                                |
| JUN               | Activator protein 1, AP-1, API-1, c-jun, cJUN, Junc, jun proto-oncogene, Jun proto-oncogene, AP-1 transcription factor subunit, LOC100288387, LOC100291417, LOC100293034, p39, v-Jun, V-jun Avian Sarcoma Virus 17 Oncogene Homolog, V-jun Sarcoma Virus 17 Oncogene Homolog                                                                                                                                                                                                                                                                                                                                                                                                                                                                                                                                |
| Luteolin          | 2-(3,4-dihydroxyphenyl)-5,7-dihydroxy-4-benzopyrone, 2-(3,4-dihydroxyphenyl)-5,7-dihydroxychromen-4-one, 3',4',5'-tetrahydroxyflavone, 491-70-3, 4H-1-benzopyran-4-one, 2-(3,4-dihydroxyphenyl)-5,7-dihydroxy- (9C), C15H10O6, cyanidenon 1470, digitoflavone, flacitrin, luteolol                                                                                                                                                                                                                                                                                                                                                                                                                                                                                                                          |
| MAPK8             | A1849689, C-JUN N-TERMINAL KINASE1, JNK, JNK1, JNK1A2, JNK21B1/2, JNK-46, mitogen-activated protein kinase 8, p46JNK1, p46JNK1 alpha, p46JNK1 α, Prk, PRKM8, SAPK1, SAPK1c, Sapk gamma, SAPK P46, Sapk γ, STRESS-ACTIVATED protein KINASE-LIKE KINASE                                                                                                                                                                                                                                                                                                                                                                                                                                                                                                                                                       |
| MCM7              | A1747533, CDC47, D16Mg124, mCDC47, MCM2, Mcmd7, minichromosome maintenance complex component 7, P1.1-MCM3, P1CDC47, P85MCM, PNAS146, PPP1R104                                                                                                                                                                                                                                                                                                                                                                                                                                                                                                                                                                                                                                                               |
| MDM2              | 170007J15RIK, AA415488, ACTFS, hdm2, HDMX, LSKB, MDM2-A1, MDM2 proto-oncogene, MGC5370, Transformed 3t3 cell double minute 2, transformed mouse 3T3 cell double minute 2                                                                                                                                                                                                                                                                                                                                                                                                                                                                                                                                                                                                                                    |
| MED1              | A1480703, ARC205, CRSP, CRSP1, CRSP200, CRSP205, CRSP210, DRIP, DRIP205, DRIP230, I11Jus, I11Jus15, Med220, mediator complex subunit 1, P, PBP, PPARBP, PPARGBP, RB18A, RGD1559552, TRAP, TRAP220, TRIP-2                                                                                                                                                                                                                                                                                                                                                                                                                                                                                                                                                                                                   |
| MYC               | AU016757, bHLHe3, bHLHe39, CMYC, C-MYC-P64, mMYC, MRTL, Myc2, MYCC, MYC proto-oncogene, bHLH transcription factor, myelocytomatosis oncogene, N, Niard, Nird, RNCMYC                                                                                                                                                                                                                                                                                                                                                                                                                                                                                                                                                                                                                                        |
| NCOA2             | bHLHe7, bHLHe75, D1Ertd433, D1Ertd433e, Gr, GRIP-1, KAT13, KAT13C, nuclear receptor coactivator 2, SRC, SRC-2, TIF-, TIF-2, TIF2/GR                                                                                                                                                                                                                                                                                                                                                                                                                                                                                                                                                                                                                                                                         |
| NCOA3             | 2010305B15RIK, ACTR, A1, AIB-1, AV321064, bHLHe4, bHLHe42, CAGH16, CTG26, KAT13, KAT13B, nuclear receptor coactivator 3, p, pCIP, pCip, RA, RAC3, Sr, SRC-1, SRC-3, TNRC14, TNRC16, TRA, TRAM, TRAM-1                                                                                                                                                                                                                                                                                                                                                                                                                                                                                                                                                                                                       |
| NCOA7             | 9030406N13RIK, dj187J11.3, ERAP140, ESNA1, Nbla00052, Nbla10993, NCOA7-AS, nuclear receptor coactivator 7, RGD1566426, TLDC4                                                                                                                                                                                                                                                                                                                                                                                                                                                                                                                                                                                                                                                                                |
| NEDD8             | CDK8, NEDD8 ubiquitin like modifier, neural precursor cell expressed, developmentally down-regulated gene 8, Rub, Rub1, Similar to nedd8                                                                                                                                                                                                                                                                                                                                                                                                                                                                                                                                                                                                                                                                    |
| NF-1              | NF-1, Nfi                                                                                                                                                                                                                                                                                                                                                                                                                                                                                                                                                                                                                                                                                                                                                                                                   |
| NFE2L2            | BM974200, HEBP1, IMDDH1, Nr, NRF2, nuclear factor, erythroid 2-like 2, nuclear factor, erythroid derived 2, like 2                                                                                                                                                                                                                                                                                                                                                                                                                                                                                                                                                                                                                                                                                          |
| NFkB              | NF-KAPPA B, NF-κ B, nuclear factor-κ b, transcription factor nuclear factor κ b                                                                                                                                                                                                                                                                                                                                                                                                                                                                                                                                                                                                                                                                                                                             |
| NOO               | Nadph-d, NADPH QUINONE OXIDOREDUCTASE                                                                                                                                                                                                                                                                                                                                                                                                                                                                                                                                                                                                                                                                                                                                                                       |
| NR0B2             | nuclear receptor subfamily 0 group B member 2, nuclear receptor subfamily 0, group B, member 2, S, SHP, SHP-1                                                                                                                                                                                                                                                                                                                                                                                                                                                                                                                                                                                                                                                                                               |
| NR2F1             | BBOAS, BBSOAS, COUP-, COUP-2, COUP-TF1, COUP-TFA, COUP-TF1, EAR-3, Erb, ERBAL3, nuclear receptor subfamily 2 group F member 1, nuclear receptor subfamily 2, group F, member 1, SVP44, Tcfou, TCFCOUP1, TFCOUP1                                                                                                                                                                                                                                                                                                                                                                                                                                                                                                                                                                                             |
| NR1P1             | 6030458L20RIK, 8430438I05RIK, 9630050P12, AA959574, AW456757, CAKUT3, NUCLEAR FACTOR receptor INTERACTING protein 140, nuclear receptor interacting protein 1, RIP, RIP140                                                                                                                                                                                                                                                                                                                                                                                                                                                                                                                                                                                                                                  |
| p19 Arf           | A, Arf, ARF-INK4a, CDK4, CDKN2, CMM2, CYCLIN-DEPENDENT KINASE INHIBITOR 2A, INK4, INK4A, INK4a-ARF, Ink4a/Arf, MLM, MTS, MTS-1, p1, p14ARF/ p16INK4a, p16, p16/ARF, p16Cdkn2a, p16l, p16 INK4, P19, p19ARF, Pct, PCTR1, TP16                                                                                                                                                                                                                                                                                                                                                                                                                                                                                                                                                                                |
| POLA1             | alpha PRIMASE p180, AW321876, DNA polymerase alpha, DNA polymerase alpha 1, catalytic subunit, DNA polymerase alpha subunit 1, DNA polymerase α, DNA polymerase α 1, POLYMERASE α, Pola, VEODS, α PRIMASE p180                                                                                                                                                                                                                                                                                                                                                                                                                                                                                                                                                                                              |
| PTGES3            | 573044A20RIK, cPG, cPGES, Gm9789, p23, p23 COCHAPERONE, p23 PR RELATED, PGES3, prostaglandin E synthase 3, prostaglandin E synthase 3, pseudogene, Ptg, Ptges, Ptges3-pp, RGD1561913, sid31, sid3177, Teb, TEBP, Telomerase Binding Protein p23, Zhf6                                                                                                                                                                                                                                                                                                                                                                                                                                                                                                                                                       |
| RAR               | retinoic acid nuclear receptor, RETINOIC ACID NUCLEAR receptors, retinoic acid receptor, retinoic acid receptors                                                                                                                                                                                                                                                                                                                                                                                                                                                                                                                                                                                                                                                                                            |
| RB                | pRb, Rb Tumor Suppressor, Rb tumour Suppressor                                                                                                                                                                                                                                                                                                                                                                                                                                                                                                                                                                                                                                                                                                                                                              |
| RB1               | OSRC, p, p105, p105-Rb, p110 RB, p110-RB1, p105, pp110, PPP1R130, pRb, R, RB, RB-ASSOCIATED, RB transcriptional corepressor 1, Retinoblastoma tumor-suppression protein rb                                                                                                                                                                                                                                                                                                                                                                                                                                                                                                                                                                                                                                  |
| RELA              | CMCU, NF-kappa B, NF-kappa B (p65), NF KAPPA B subunit P65, NFkB, NFkB3, NF-κ B (p65), NFkB/p65, NF-κ B (p65), NF-κ B p65, NF κ B subunit P65, nos2, p6, p65, p65 NF-kappa B, p65 NFkB, p65 NF-κ B, p65/Rela, RELA proto-oncogene, NF-κ B subunit, v-rel reticulendotheliosis viral oncogene homolog A (avian)                                                                                                                                                                                                                                                                                                                                                                                                                                                                                              |
| Retinal           | 116-31-4, (2E,4E,6E,8E)-3,7-dimethyl-9-(2,6,6-trimethylcyclohexen-1-yl)nona-2,4,6,8-tetraenol, all-trans-retinal, all-trans-retinaldehyde, atRAL, C20H28O, retinal, retinal, all-trans-, vitamin A aldehyde                                                                                                                                                                                                                                                                                                                                                                                                                                                                                                                                                                                                 |
| Retinoic acid     | 13497-05-7, 187175-63-9, 22232-80-0, (2E,4E,6E,8E)-3,7-dimethyl-9-(2,6,6-trimethylcyclohexen-1-yl)nona-2,4,6,8-tetraenoic acid, 302-79-4, 56573-65-0, 7005-78-9, 75980-27-7, all-trans RA, all-trans-retinoate, all-trans retinoic acid, all-trans-retinoic acid liposomal, Altinac, Altreno, AR-623, atra, Atragen, atralin, Atralin Gel, Avita, beta all trans retinoic acid, C20H28O2, liposomal all-trans-retinoic acid, liposomal tretinoin, Renova, Retin A, Retin-A, Retin-A Micro, Retin A Micro Gel, retinoic acid, retinoic acid, all-trans-, retinoic acid, sodium salt, trans retinoic acid, tretinoinLF, tretinoin liposomal, tretinoin liposome, tretinoin potassium salt, tretinoin sodium salt, Tretinoin Topical, tretinoin zinc salt, Vesanoid, vitamin A acid, β all trans retinoic acid |
| Retinol           | 11103-57-4, (2E,4E,6E,8E)-3,7-dimethyl-9-(2,6,6-trimethylcyclohexen-1-yl)nona-2,4,6,8-tetraen-1-ol, 3,7-dimethyl-9-(2,6,6-trimethyl-1-cyclohexen-1-yl)-2,4,6,8-nona-tetraen-1-ol, 68-26-8, all-trans retinol, C20H30O, vitamin A, vitamin-A (all-trans-retinol)                                                                                                                                                                                                                                                                                                                                                                                                                                                                                                                                             |
| Retinyl esters    | C21H29O2R, retinyl esters                                                                                                                                                                                                                                                                                                                                                                                                                                                                                                                                                                                                                                                                                                                                                                                   |
| RXR               | Retinoid receptor, RXR alpha/beta/gamma, RXR α/β/γ                                                                                                                                                                                                                                                                                                                                                                                                                                                                                                                                                                                                                                                                                                                                                          |
| SILCSA52          | A1327289, CDG2M, CDGX Had-, Had-1, Sfc, Sfc8, solute carrier family 35 member A2, UDP-Gal-Tr, Uga, UGALT, UGAT, UGT, UGT1, UGT2, UGTL                                                                                                                                                                                                                                                                                                                                                                                                                                                                                                                                                                                                                                                                       |
| SMARCA4           | b2b508.1C, b2b508.1C10, b2b692C, b2b692C10, BAF190A, BRG, BRG1, CSS4, HP1-BP72, hSNF2b, MRD16, RTPS2, SNF2, SNF2b, SNF2-beta, SNF2L4, SNF2LB, SNF2-β, SW11, SW11/SNF, SWI2, SWI/SNF related, matrix associated, actin dependent regulator of chromatin, subfamily a, member 4                                                                                                                                                                                                                                                                                                                                                                                                                                                                                                                               |
| SMRTalpha         | CTC26, N-CoR, nuclear receptor co-repressor 2, RETINOID SILENCER, SM, SMAP270, SMR, SMRT, SMRTE, SMRTE-1au, TNRC14, TRAC, TRAC-1                                                                                                                                                                                                                                                                                                                                                                                                                                                                                                                                                                                                                                                                            |
| SP1               | 1110003E12RIK, AA450830, A1845540, Sp1-1, Sp1 transcription factor, Sp1 (trans spliced isoform), Trans-acting transcription factor 1                                                                                                                                                                                                                                                                                                                                                                                                                                                                                                                                                                                                                                                                        |
| SRC               | ASV, AW259666, BS27, c-SRC, p60-Src, PP60, pp60c, Pp60/c-Src, pp60c-src, Rous sarcoma oncogene, SRC1, SRC proto-oncogene, non-receptor tyrosine kinase, THC6, TVHUSC                                                                                                                                                                                                                                                                                                                                                                                                                                                                                                                                                                                                                                        |
| TCDD              | 1746-01-6, 2,3,7,8-tetrachlorodibenzo-p-dioxin, 2,3,7,8-tetrachlorodibenzo(b,e)(1,4)dioxin, 2,3,7,8-tetrachlorodibenzo-p-dioxin, C12H4Cl4O2, dibenzo(b,e)(1,4)dioxin, 2,3,7,8-tetrachloro-, dibenzo-p-dioxin, 2,3,7,8-tetrachloro-, dioxin, TCDD                                                                                                                                                                                                                                                                                                                                                                                                                                                                                                                                                            |
| TFDP1             | DILC, Dp, DP-1, Drif, DRTF1, TB2/DP1, transcription factor Dp-1                                                                                                                                                                                                                                                                                                                                                                                                                                                                                                                                                                                                                                                                                                                                             |
| TIFF1             | Bce, BCEI, D21S21, HP1.A, HPS2, NEPHROCALCIN, p, pNR-2, PS2, TIFF1, trefol factor 1                                                                                                                                                                                                                                                                                                                                                                                                                                                                                                                                                                                                                                                                                                                         |
| Tgfbeta           | Tgfb, TGF-beta 1, 2, and 3, TGF β, TGF-β 1, 2, and 3, transforming growth factor-β                                                                                                                                                                                                                                                                                                                                                                                                                                                                                                                                                                                                                                                                                                                          |
| TGM2              | Fig, Gl[a], G[α]h, TG2, TGA2, TGAS, TGase, TGase C, TgaseII, TGC, TG(C), TISSUE TRANSGLUTAMINASE, TISSUE TRANSGLUTAMINASE 2, Transglutaminase 2, Transglutaminase, TRANSGLUTAMINASE 2, transglutaminase 2, C polypeptide, iTG, iTGAs, T-Tgase                                                                                                                                                                                                                                                                                                                                                                                                                                                                                                                                                               |
| TP53              | bb1, BCC7, bly, bly, BMF55, LFS1, p4, p44, p5, P53, P53 cellular tumour antigen, p53 tumor suppressor, transformation related protein 53, TRP53, tumor protein p53, tumour protein p53                                                                                                                                                                                                                                                                                                                                                                                                                                                                                                                                                                                                                      |
| TRIP11            | 2610511G22RIK, 3110031G15RIK, 6030460N08RIK, ACG1A, A1450776, CEV14, GMAP-2, GMAP-210, ODOD, THR COACTIVATOR, thyroid hormone receptor interactor 11, TRIP, TRIP230                                                                                                                                                                                                                                                                                                                                                                                                                                                                                                                                                                                                                                         |
| Trp73             | delta, p7, P73, p73RhoGAP, Tap, transformation related protein 73, Trp73, tumor protein p73, tumour protein p73, δ                                                                                                                                                                                                                                                                                                                                                                                                                                                                                                                                                                                                                                                                                          |
| TYR               | albino, ATN, CMM8, Dopa oxidase, Melanogenesis Related Tyrosinase, Oc, OCA1, OCA1A, OCA1A, SHEP3, skc3, skc3s, tyrosinase                                                                                                                                                                                                                                                                                                                                                                                                                                                                                                                                                                                                                                                                                   |

## Pathway Analysis Using IPA Software; canonical pathway

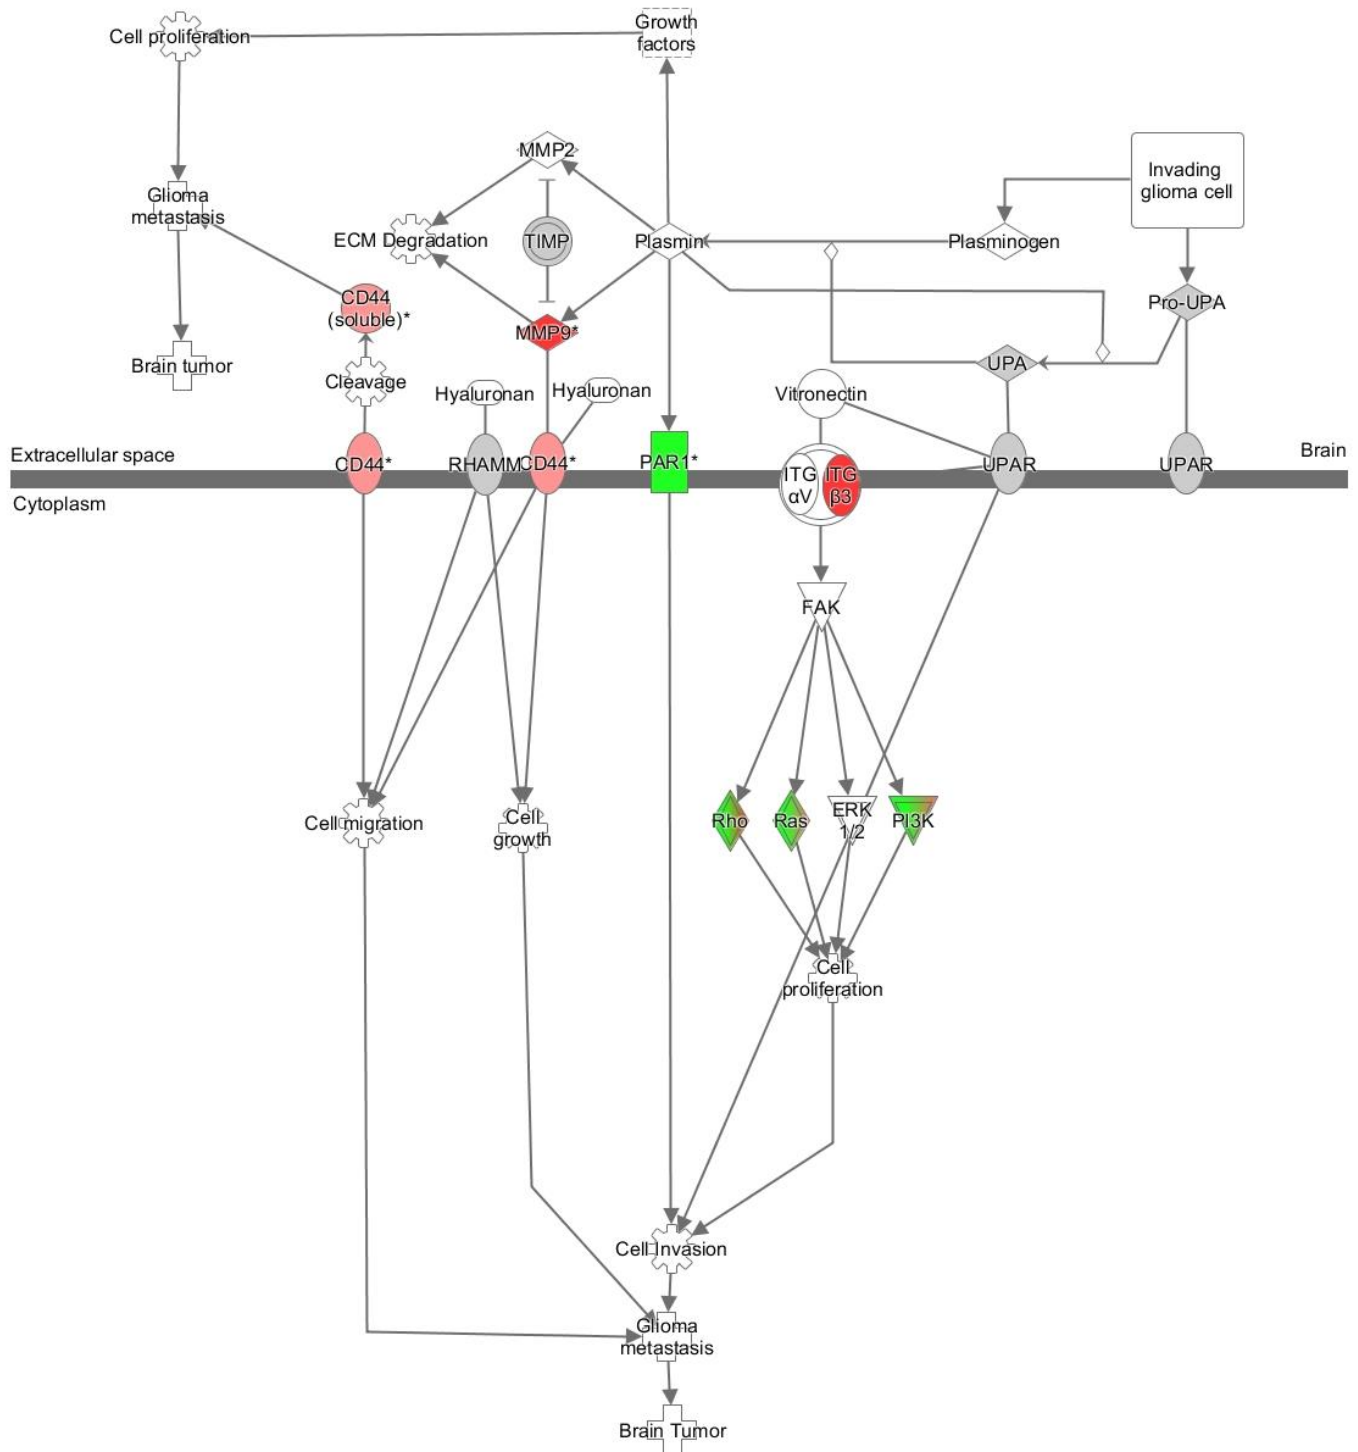

Figure S45. Glioma Invasiveness Signaling at 6 h

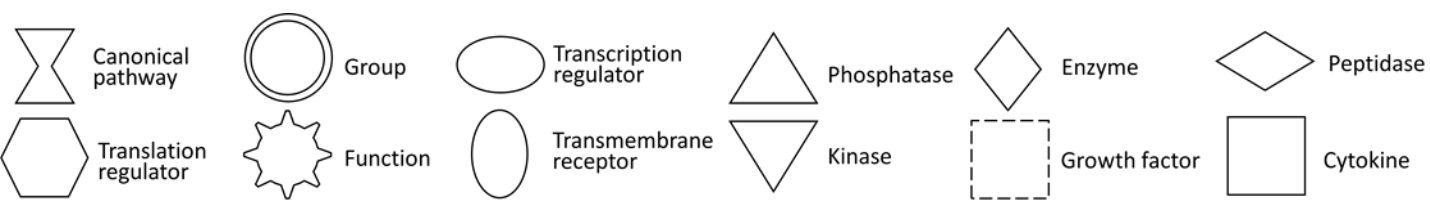

Red: Increased, FDR<0.05 versus solvent control

Green: Decreased, FDR<0.05 versus solvent control

| Symbol                  | Synonym(s)                                                                                                                                                                                                                                                                                                                                                                                                                                                                                                                                                                                                                                    |
|-------------------------|-----------------------------------------------------------------------------------------------------------------------------------------------------------------------------------------------------------------------------------------------------------------------------------------------------------------------------------------------------------------------------------------------------------------------------------------------------------------------------------------------------------------------------------------------------------------------------------------------------------------------------------------------|
| CD44                    | 216062 AT, AU023126, AW121933, AW146109, CD44A, CD44 Antigen, CD44 (containing exon 5), Cd44i, CD44 molecule (Indian blood group), CD44 (soluble), CD44 STANDARD FROM, CDW44, CSPG8, ECMR-III, Epican, HCELL, HERM, HERMES, Hermes antigen, HUTCH-I, IN, LHR, Ly-2, Ly-24, MC56, MDU2, MDU3, METAA, MIC4, NKT.44, Pgp, Pgp-1, RHAMM                                                                                                                                                                                                                                                                                                           |
| ERK1/2                  | MAPK p44/42, MAPK p44/p42, p42/44 mapk, P42/p44 erk, P42/p44 mapk, p42/p44 MAP KINASE                                                                                                                                                                                                                                                                                                                                                                                                                                                                                                                                                         |
| F2R                     | A1482343, CF2, CF2R, coagulation factor II (thrombin) receptor, coagulation factor II thrombin receptor, HTR, P, PAR-1, Th, ThrR, TR, TRGPC, $\alpha$ Thrombin Receptor                                                                                                                                                                                                                                                                                                                                                                                                                                                                       |
| HMMR                    | AA386826, CD168, hyaluronan-mediated motility receptor, hyaluronan mediated motility receptor (RHAMM), IHABP, Rha, RHAMM                                                                                                                                                                                                                                                                                                                                                                                                                                                                                                                      |
| Hyaluronan              | 34448-35-6, 9004-61-9, 9067-32-7, Amvisc, Amvisc Plus, Biolon, C28H44N2NaO23+, Duovisc, etamucine, EUFLEXA, HA, Healon, Healon5, Hyalgan, hyaluronan, hyaluronan acid, hyaluronate, hyaluronate sodium, hyaluronic acid oligosaccharide, hyaluronic acid, sodium salt, Hyruan Plus, Hyvisc, Iuroniit, Orthovisc, Provisc, sodium;(2S,3S,4S,5R,6R)-6-[(2S,3R,4R,5S,6R)-3-acetamido-2-[(2S,3S,4R,5R,6R)-6-[(2R,3R,4R,5S,6R)-3-acetamido-2,5-dihydroxy-6-(hydroxymethyl)oxan-4-yl]oxy-2-carboxy-4,5-dihydroxyoxan-3-yl]oxy-5-hydroxy-6-(hydroxymethyl)oxan-4-yl]oxy-3,4,5-trihydroxyoxane-2-carboxylic acid, sodium hyaluronate, Viscoat, Vitrax |
| Integrin alpha-V beta 3 | alpha-v beta-3, alpha V beta 3 Integrin, Integrin-alpha-beta3, Integrin- $\alpha$ -beta3, Integrin $\alpha$ V beta3, Integrin $\alpha$ V $\beta$ 3, Vitronectin Receptor, VnR, $\alpha$ -5-beta3, $\alpha$ 5 $\beta$ 3, $\alpha$ -v $\beta$ -3, $\alpha$ V $\beta$ 3 Integrin                                                                                                                                                                                                                                                                                                                                                                 |
| ITGAV                   | 1110004F14RIK, 2610028E01RIk, alpha V, CD51, D430040G12RIK, integrin alpha V, integrin subunit alpha V, integrin subunit $\alpha$ V, Integrin $\alpha$ V, MSK8, VNRA, VTNR, $\alpha$ V                                                                                                                                                                                                                                                                                                                                                                                                                                                        |
| ITGB3                   | BDPLT16, BDPLT2, beta 3, CD61, GP3A, GPIIIa, GT, HPA-4, INGRB3, integrin beta 3, integrin subunit beta 3, integrin subunit $\beta$ 3, Integrin- $\beta$ 3, $\beta$ 3                                                                                                                                                                                                                                                                                                                                                                                                                                                                          |
| MMP2                    | Clg, CLG4, CLG4A, Ge, GelA, GELATINASE, Gelatinase A, matrix metalloproteinase 2, METALLOPROTEINASE 2, MMP-, MMP-II, MONA, TBE-1                                                                                                                                                                                                                                                                                                                                                                                                                                                                                                              |
| MMP9                    | AW743869, B/MMP, B/MMP9, Clg4, CLG4B, COLLAGENASE type IV, Gelatinase B, GELB, GI 92-kda, MANDP2, matrix metalloproteinase 9, METALLOPROTEINASE 9, MMP-, pro-MMP-9                                                                                                                                                                                                                                                                                                                                                                                                                                                                            |
| PI3K                    | 1-phosphatidylinositol 3-kinase, 2.7.1.137, ATP:1-phosphatidyl-1D-myo-inositol 3-phosphotransferase, Phosphatidylinositol 3 kinase, phosphatidylinositol 3'-kinase, PI3-kinase, PtdIns 3 Kinase, type III phosphoinositide 3-kinase, type I phosphatidylinositol kinase, Vps34p                                                                                                                                                                                                                                                                                                                                                               |
| PLAU                    | ATF, BDPLT5, plasminogen activator, urokinase, Pro-UPA, QPD, u-, UPA, uPA 50 kd form, UPA-H, UPAM, URK                                                                                                                                                                                                                                                                                                                                                                                                                                                                                                                                        |
| PLAUR                   | CD87, Par, plasminogen activator, urokinase receptor, Plaur3, u-, U-PAR, uPAR-2, UPAR-3, Urinary plasminogen activator receptor 2, URKR, UROKINASE R, Urokinase-type plasminogen activator receptor                                                                                                                                                                                                                                                                                                                                                                                                                                           |
| PLG                     | Ab1-346, A1649309, GLU-PG, LPA, P, Pg, PG2, plasminogen, Scdp                                                                                                                                                                                                                                                                                                                                                                                                                                                                                                                                                                                 |
| PTK2                    | FA, Fad, FADK, FADK 1, FAK, FAK1, FAK related non-kinase, FR, p125FAK, pp125FAK, PPP1R71, protein tyrosine kinase 2, PTK2 protein tyrosine kinase 2, TYROSINE KINASE 2                                                                                                                                                                                                                                                                                                                                                                                                                                                                        |
| Rho                     | GTPase Rho, Rho, Rho Family, RHO-GTPASE, Rho-like Gtpase                                                                                                                                                                                                                                                                                                                                                                                                                                                                                                                                                                                      |
| VTN                     | Aa1018, A1256434, V75, vitronectin, VN, VNT                                                                                                                                                                                                                                                                                                                                                                                                                                                                                                                                                                                                   |

# Pathway Analysis Using IPA Software; canonical pathway

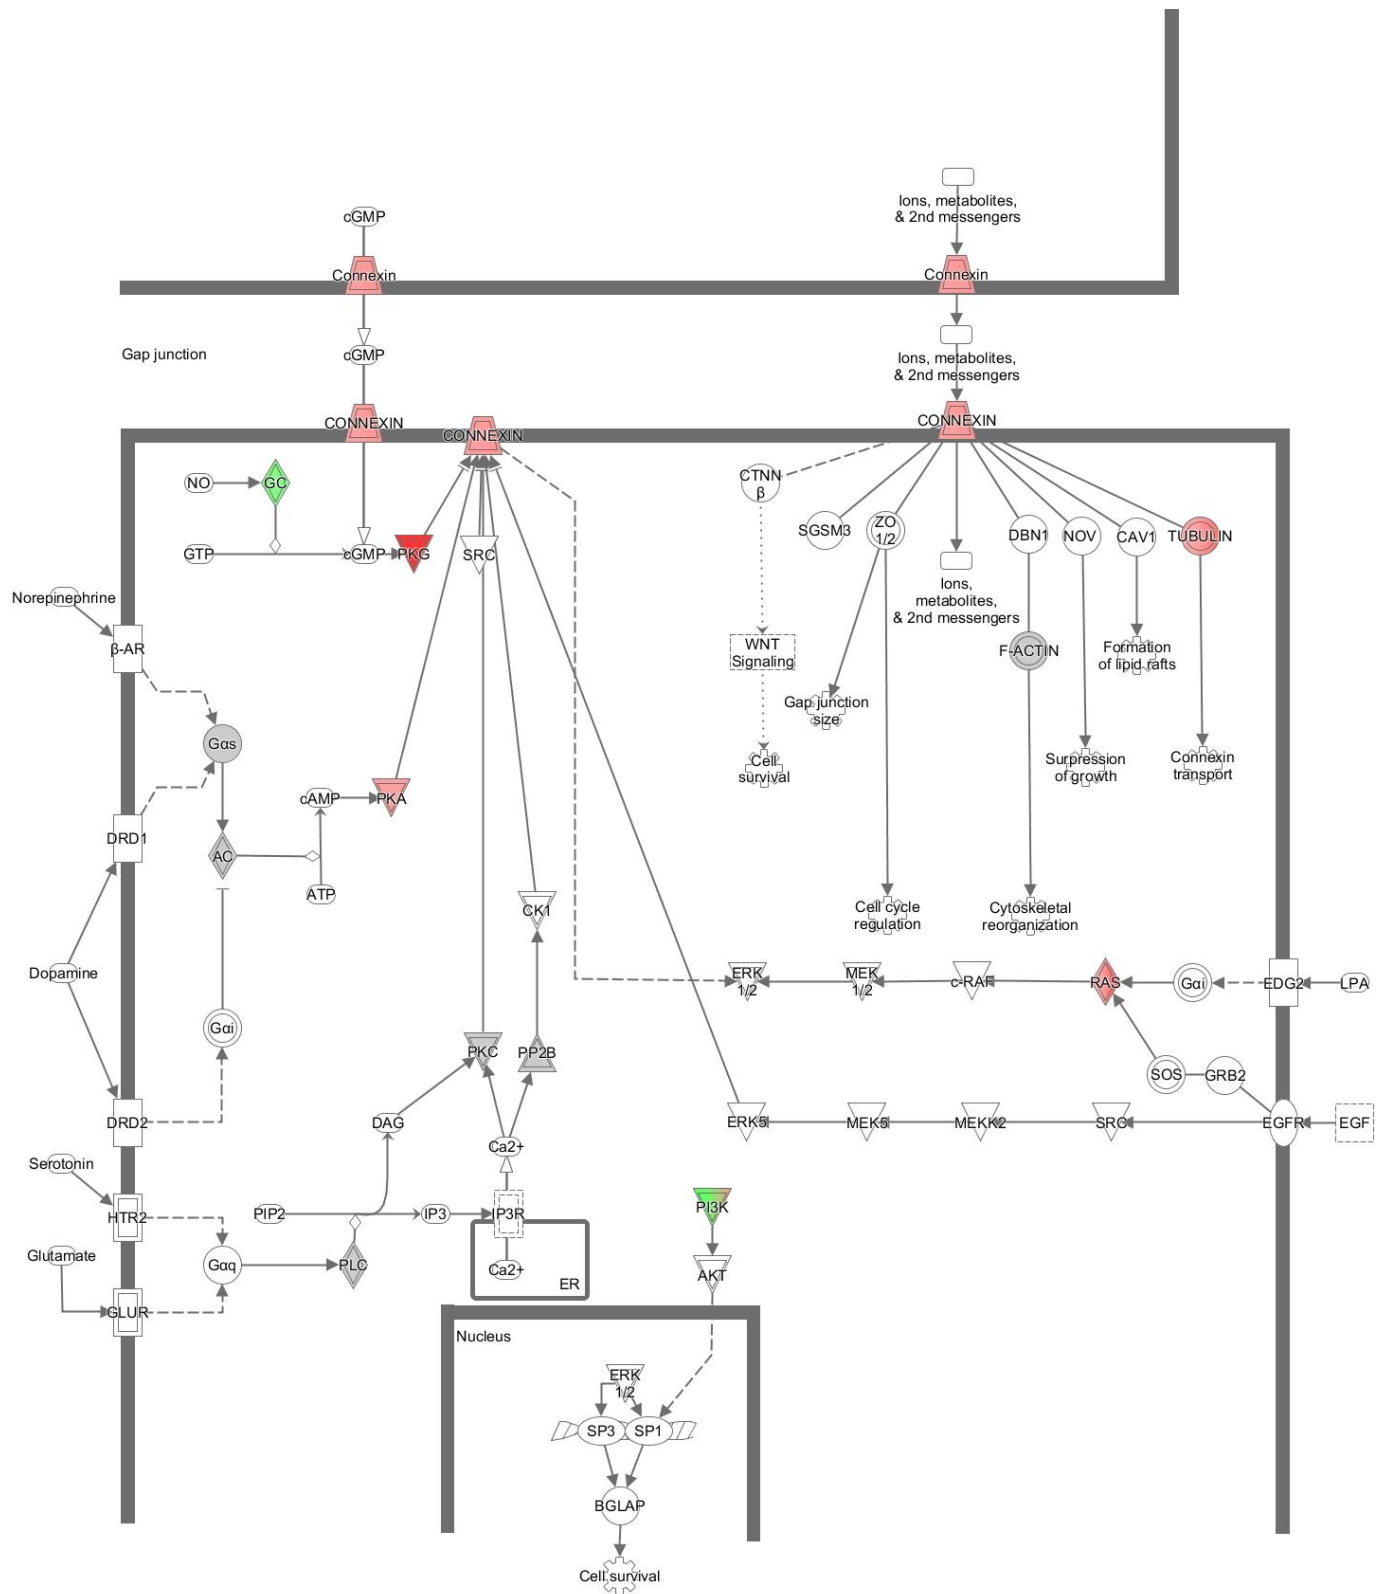

Figure S46. Gap Junction Signaling at 24 h

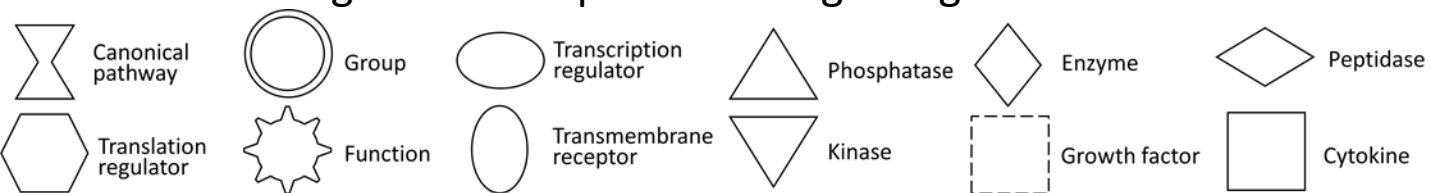

Red: Increased, FDR<0.05 versus solvent control

Green: Decreased, FDR<0.05 versus solvent control



| Symbol           | Synonym(s)                                                                                                                                                                                                                                                                                                                                                                                                                                                                                                                                                                                                                                                                                                                                                            |
|------------------|-----------------------------------------------------------------------------------------------------------------------------------------------------------------------------------------------------------------------------------------------------------------------------------------------------------------------------------------------------------------------------------------------------------------------------------------------------------------------------------------------------------------------------------------------------------------------------------------------------------------------------------------------------------------------------------------------------------------------------------------------------------------------|
| ADCY             | 3',5'-cyclic AMP synthetase, 4.6.1.1, AC, Adenylate Cyclase, Adenyl Cyclase, Adenyl cyclase, ATP diphosphate-lyase (cyclizing), mAC, sAC                                                                                                                                                                                                                                                                                                                                                                                                                                                                                                                                                                                                                              |
| ADRB1            | Adrb, ADRB1R, ADR-beta1, Adrenergic Receptor Beta 1, adrenergic receptor, beta 1, Adrenergic Receptor $\beta$ 1, adrenergic receptor, $\beta$ 1, adrenoceptor beta 1, adrenoceptor $\beta$ 1, ADR- $\beta$ 1, B1AR, beta-1 adrenergic receptor, beta1-ADRENORECEPTOR, BETA1AR, beta2-AR, beta-AR, FNSS2, RATB1AR, RHR, $\beta$ 1-adrenergic receptor, $\beta$ 1-AR, $\beta$ 2-AR, $\beta$ -AR                                                                                                                                                                                                                                                                                                                                                                         |
| AKT              | AKT1/2/3, B/Akt, PKB, RAC-PK                                                                                                                                                                                                                                                                                                                                                                                                                                                                                                                                                                                                                                                                                                                                          |
| ATP              | [[[2R,3S,4R,5R]-5-(6-aminopurin-9-yl)-3,4-dihydroxyoxolan-2-yl]methoxy-hydroxyphosphoryl] phosphono hydrogen phosphate, 56-65-5, 9-beta-D-arabinofuranosyladenine 5'-triphosphate, 9- $\beta$ -D-arabinofuranosyladenine 5'-triphosphate, adenosine 5'-(tetrahydrogen triphosphate), adenosine 5'-triphosphate, ATP, ATP4-, C10H16N5O13P3                                                                                                                                                                                                                                                                                                                                                                                                                             |
| BGLAP            | A461847, Bgl, Bgla, Bglap1, Bglap2, Bglap3, Bglap-rs1, BGP, BGP2, Bgpr, Bgpra, bone gamma-carboxyglutamate protein, bone gamma-carboxyglutamate protein 2, bone gamma-carboxyglutamate protein 3, Bone Gla-protein, bone $\gamma$ -carboxyglutamate protein, bone $\gamma$ -carboxyglutamate protein 2, bone $\gamma$ -carboxyglutamate protein 3, mOC-, mOC-A, mOC-B, mOC-X, O, OC, OCN, OC-X, OG, OG1, Og2, ORG, oste, Osteocalcin, Osteocalcin2                                                                                                                                                                                                                                                                                                                    |
| Ca2+             | 14127-61-8, Ca+2, calcium, calcium(2+), calcium cation, calcium citrate, calcium ion, calcium, ion (Ca2+), calcium ions, Citracal, tricalcium dicitrate                                                                                                                                                                                                                                                                                                                                                                                                                                                                                                                                                                                                               |
| cAMP             | 11002-78-1, 33116-15-3, 3',5'-cyclic AMP, 3',5'-monophosphate, adenosine cyclic, 37839-81-9, (4aR,6R,7R,7aS)-6-(6-aminopurin-9-yl)-2-hydroxy-2-oxo-4a,6,7,7a-tetrahydro-4H-furo[3,2-d][1,3,2]dioxaphosphinin-7-ol, 54532-48-8, 55576-98-2, 60-92-4, 66067-13-8, 68407-13-6, adenosine 3',5'-phosphate, adenosine, cyclic 3',5'-(hydrogen phosphate), adenosine cyclic 3,5 monophosphate, adenosine cyclic 3',5'-monophosphate, adenosine cyclic monophosphate, C10H12N5O6P, cAMP, cyclic-3',5'-monophosphate, adenosine, cyclic adenosine monophosphate, cyclic adenylic acid, cyclic AMP, disodium salt, cyclic AMP, monoammonium salt, cyclic AMP, monopotassium salt, cyclic AMP, monosodium salt, cyclic AMP, sodium salt                                         |
| CAV1             | BSCL3, Cav, cave, Cavelolin 1, CAVEOLIN, Caveolin1, caveolin 1, caveolae protein, CGL3, LCCNS, LOC100362870, MSTP085, PPH3, VIP21                                                                                                                                                                                                                                                                                                                                                                                                                                                                                                                                                                                                                                     |
| CCN3             | C13008N23RIK, CCN, cellular communication network factor 3, IBP-9, IGFBP-9, IGFBP-RP3, NOV, NOVH                                                                                                                                                                                                                                                                                                                                                                                                                                                                                                                                                                                                                                                                      |
| cGMP             | 3',5'-cyclic GMP, 7665-99-8, 9-[[[4aR,6R,7R,7aS)-2,7-dihydroxy-2-oxo-4a,6,7,7a-tetrahydro-4H-furo[3,2-d][1,3,2]dioxaphosphinin-6-yl]-2-amino-1H-purin-6-one, C10H12N5O7P, cGMP, guanosine-3',5'-cyclic monophosphate, guanosine 3',5'-cyclic phosphate, guanosine cyclic 3',5'-(hydrogen phosphate)                                                                                                                                                                                                                                                                                                                                                                                                                                                                   |
| CK1              | Casein Kinase I, CKI                                                                                                                                                                                                                                                                                                                                                                                                                                                                                                                                                                                                                                                                                                                                                  |
| CTNBN1           | armadillo, Beta-cat, beta CATENIN, Bfc, Cat, CATENIN beta, catenin beta 1, catenin (cadherin associated protein), beta 1, catenin (cadherin associated protein), $\beta$ 1, CATENIN $\beta$ , catenin $\beta$ 1, CATNB, CTNB1, CTNNB, CTNN beta, CTNN $\beta$ , EVR7, Mesc, MRD19, NEDSDV, $\beta$ -cat, $\beta$ -catenin                                                                                                                                                                                                                                                                                                                                                                                                                                             |
| DAG              | DAG, diacylglycerides, diglyceride                                                                                                                                                                                                                                                                                                                                                                                                                                                                                                                                                                                                                                                                                                                                    |
| DBN1             | D0S117E, Drebrin, drebrin 1, Drebrin E, DREBRIN E2                                                                                                                                                                                                                                                                                                                                                                                                                                                                                                                                                                                                                                                                                                                    |
| Dopamine         | 1,2-benzenediol, 4-(2-aminoethyl)-, 1,2-benzenediol, 4-(2-aminoethyl)- (9CI), 4-(2-aminoethyl)benzene-1,2-diol, 50444-17-2, 51-61-6, 62-31-7, C8H11NO2, DA, dopamine HCl, dopamine hydrochloride, hydroxytyramine, Intropin, Revimine                                                                                                                                                                                                                                                                                                                                                                                                                                                                                                                                 |
| DRD1             | C030036C15RIK, D1, D1a, D1DR, D1R, D1 receptor, D1 receptors, Da-d1 receptor, DADR, Dopamine d1 receptor, dopamine receptor D1, DR1, Drd-, DRD1A, Gpcr, Gpcr15                                                                                                                                                                                                                                                                                                                                                                                                                                                                                                                                                                                                        |
| DRD2             | D2, D2a dopamine receptor, D2 DOPAMINE receptor, D2 dopaminergic receptor, D2DR, D2-like receptors, D2R, dopamine D2, Dopamine D2L receptor, dopamine D2 receptor, dopamine receptor D2, Drd-                                                                                                                                                                                                                                                                                                                                                                                                                                                                                                                                                                         |
| EGF              | AI790464, EGF-1, epidermal growth factor, HOMG4, URG                                                                                                                                                                                                                                                                                                                                                                                                                                                                                                                                                                                                                                                                                                                  |
| EGFR             | 9030024J15RIK, A1552599, C-ERBB, EGFR1, EGF receptor, EGFR viii, EGF-TK, epidermal growth factor receptor, Erb, ERBB, ERBB1, Err, Errb1, ERRP, HER1, HER1 (EGFR), MENA, NISBD2, PIG61, Wa, wa-2, Wa5                                                                                                                                                                                                                                                                                                                                                                                                                                                                                                                                                                  |
| ERK1/2           | MAPK p44/42, MAPK p44/p42, p42/44 mapk, P42/p44 erk, P42/p44 mapk, p42/p44 MAP KINASE                                                                                                                                                                                                                                                                                                                                                                                                                                                                                                                                                                                                                                                                                 |
| F Actin          | Filamentous Actin                                                                                                                                                                                                                                                                                                                                                                                                                                                                                                                                                                                                                                                                                                                                                     |
| G proteinalpha I | Galphai, Gi, Gi alpha, GI $\alpha$ , GNAI, Gn alpha, Gn $\alpha$ , G protein ai, G protein alpha I SUBUNITS, G protein $\alpha$ I, G protein $\alpha$ I SUBUNITS, Gai                                                                                                                                                                                                                                                                                                                                                                                                                                                                                                                                                                                                 |
| Glutamate        | 142-47-2, 19473-49-5, (2S)-2-aminopentanedioic acid, 56-86-0, C5H9NO4, Glu, glutamate, glutamic acid, glutaminol, L-Glu, L-glutamate, L-glutamic acid, monosodium glutamate, MPG, potassium glutamate, potassium L-glutamate, S-glutamate, sodium glutamate                                                                                                                                                                                                                                                                                                                                                                                                                                                                                                           |
| Glutamaterceptor | Glur                                                                                                                                                                                                                                                                                                                                                                                                                                                                                                                                                                                                                                                                                                                                                                  |
| GNAQ             | 1110005L02RIK, 6230401102RIK, AA408290, AW060788, CMC1, DKFZp686D0521, Dsk, Dsk1, Dsk10, Gal, G-ALPHA-q, GQA, G protein alpha Q, G protein alpha Q/11, G protein subunit alpha q, G protein subunit $\alpha$ q, G protein $\alpha$ Q, G protein $\alpha$ Q/11, Gq, Gqalpha, Gql, Gq protein alpha subunit, Gq protein $\alpha$ subunit, Gqa, guanine nucleotide binding protein, alpha q polypeptide, guanine nucleotide binding protein, $\alpha$ q polypeptide, G- $\alpha$ -q, Pst receptor, SWS                                                                                                                                                                                                                                                                   |
| GNAS             | 5530400H20RIK, A930027G11RIK, AHO, AHO2, ALEX, C130027O20RIK, C20or45, G, Ga, G-alpha-8, G alpha S, GANGLIOSIDE EXPRESSION FACTOR 2, Gn, GNAS1, GNAS complex locus, GNAS (guanine nucleotide binding protein, alpha stimulating) complex locus, GNAS (guanine nucleotide binding protein, $\alpha$ stimulating) complex locus, Gnpas, G protein $\alpha$ s, GPSA, Gs-, GSA, Gs-alpha, Gs alpha subunit, Gs GTP-Binding, GSP, GS $\alpha$ , Gs $\alpha$ subunit, Guanine nucleotide binding protein, alpha stimulating, Guanine nucleotide binding protein, $\alpha$ stimulating, G- $\alpha$ -8, G $\alpha$ S, LOC100361691, LOC690994, N, Nes, NESP, Nesp55, NESPL, Oed, OEDSML, P, P1, P2, P3, PHP1A, PHP1B, PITA3, POH, RGD:621483, SCG, SCG6, SgVli, XL, XLalphas |
| GRB2             | AA408164, ASH, Ash-psi, EGFRBP-GRB2, GRAB2, GRBS, growth factor receptor bound protein 2, MST084, MSTP084, NCKAP2                                                                                                                                                                                                                                                                                                                                                                                                                                                                                                                                                                                                                                                     |
| GTP              | [[[2R,3S,4R,5R)-5-(2-amino-6-oxo-1H-purin-9-yl)-3,4-dihydroxyoxolan-2-yl]methoxy-hydroxyphosphoryl] phosphono hydrogen phosphate, 86-01-1, C10H16N5O14P3, GTP, guanosine 5'-(tetrahydrogen triphosphate), Mg-GTP                                                                                                                                                                                                                                                                                                                                                                                                                                                                                                                                                      |
| Guanylatecyclase | 4.6.1.2, GC, GC activity, GTP diphosphate-lyase (cyclizing), Guanylate cyclase, guanyl cyclase, Guanylyl Cyclase                                                                                                                                                                                                                                                                                                                                                                                                                                                                                                                                                                                                                                                      |
| HTR2             | 5-HT2, 5-Hi2 Receptor, 5-HTR2                                                                                                                                                                                                                                                                                                                                                                                                                                                                                                                                                                                                                                                                                                                                         |
| Insp3r           | Inositol 1,4,5-triphosphate receptor, Inositol Triphosphate Receptor, INSP3R, Ip3r, IP3 receptor, IP3-Sensitive Calcium Channel                                                                                                                                                                                                                                                                                                                                                                                                                                                                                                                                                                                                                                       |
| IP3              | 27121-73-9, inositol trisphosphate, IP3, myo-inositol, tris(dihydrogen phosphate)                                                                                                                                                                                                                                                                                                                                                                                                                                                                                                                                                                                                                                                                                     |
| LPA              | LPA, lysophosphatidic acids, lysophosphatidyl acid                                                                                                                                                                                                                                                                                                                                                                                                                                                                                                                                                                                                                                                                                                                    |
| LPAR1            | A1326300, clone 4.9, EDG2, ENDOTHELIAL DIFFERENTIATION LYSOPHOSPHATIDIC ACID G-protein-COUPLED receptor 2, Gpcr, Gpcr26, Kdt2, L, LPA1, LPA1 receptor, LPA2, LPA receptor 1, LYSOPHOSPHATIDIC ACID G-protein-COUPLED receptor, lysophosphatidic acid receptor 1, Mrec1.3, rec.1.3, vzg-, VZG1                                                                                                                                                                                                                                                                                                                                                                                                                                                                         |
| MAP2K1/2         | MEK1/2, MKK1/2                                                                                                                                                                                                                                                                                                                                                                                                                                                                                                                                                                                                                                                                                                                                                        |
| MAP2K5           | A1324775, A1428457, HsT17454, MAP kinase kinase 5, MAPKK5, MEK5, mitogen-activated protein kinase kinase 5, MKK5, PRKMK5                                                                                                                                                                                                                                                                                                                                                                                                                                                                                                                                                                                                                                              |
| MAP3K2           | 9630061B06RIK, A1585793, LOC100506904, M3K2, MEKK2, MEKK2B, mitogen-activated protein kinase kinase kinase 2                                                                                                                                                                                                                                                                                                                                                                                                                                                                                                                                                                                                                                                          |
| MAPK7            | b2b2346C, b2b2346Clo, BMK-1, ERK, ERK4, ERK-5, Erk5-T, ERK7, FRK, LOC100912585, mitogen-activated protein kinase 7, mitogen-activated protein kinase 7-like, PRKM7                                                                                                                                                                                                                                                                                                                                                                                                                                                                                                                                                                                                    |
| NO               | 10102-43-9, Amidogen, oxo-, EDRF, gaseous nitric oxide, Genosyl, inhaled nitric oxide, INOmax, Mononitrogen monoxide, nitric oxide, nitric oxide gas, nitric oxide gas radical, Nitric oxide trimer, Nitrogen monoxide, nitrogen monoxide, nitrogen oxide (NO), nitrogen protoxide, Nitrosyl radical, NMO, NO                                                                                                                                                                                                                                                                                                                                                                                                                                                         |
| Norepinephrine   | 108341-18-0, 1,2-benzenediol, 4-(2-amino-1-hydroxyethyl)-, (R)- (9CI), 1,2-benzenediol, 4-((R)-2-amino-1-hydroxyethyl)-, [3H]-norepinephrine, 4-((1R)-2-amino-1-hydroxyethyl)benzene-1,2-diol, 51-41-2, benzyl alcohol, alpha-(aminomethyl)-3,4-dihydroxy-, (-)-, benzyl alcohol, $\alpha$ -(aminomethyl)-3,4-dihydroxy-, (-), C8H11NO3, D-(-)-noradrenaline, Levophed, Levophed Bitartrate, L-noradrenaline, L-norepinephrine, NE, NE-hydrochloride, noradrenalin, noradrenaline, (-)-noradrenaline, (-)-norepinephrine, norepinephrine bitartrate, (R)-noradrenaline, (R)-norepinephrine, (R)-(-)-norepinephrine                                                                                                                                                    |
| PI3K             | 1-phosphatidylinositol 3-kinase, 2.7.1.137, ATP:1-phosphatidyl-1D-myo-inositol 3-phosphotransferase, Phosphatidylinositol 3 kinase, phosphatidylinositol 3'-kinase, PI3-kinase, PtdIns 3 Kinase, type III phosphoinositide 3-kinase, type I phosphatidylinositol kinase, Vps34p                                                                                                                                                                                                                                                                                                                                                                                                                                                                                       |
| PIP2             | 1,2-diacyl-sn-glycero-3-phospho-(1'-myo-inositol-4',5'-bisphosphate), 1-O-(3-sn-phosphatidyl)-1D-myo-inositol 4,5-bis(dihydrogen phosphate), 1-phosphatidyl-1D-myo-inositol 4,5-bisphosphate, C11H19O19P3R2                                                                                                                                                                                                                                                                                                                                                                                                                                                                                                                                                           |
| PKA              | A-Kinase, cAMP-Dependent Protein Kinase, cyclic AMP depended protein kinase, protein KINASE A                                                                                                                                                                                                                                                                                                                                                                                                                                                                                                                                                                                                                                                                         |
| PKC              | Cnppkc, PKC, Pkc(s), Protein Kinase C                                                                                                                                                                                                                                                                                                                                                                                                                                                                                                                                                                                                                                                                                                                                 |
| PKG              | cgk, protein KINASE G                                                                                                                                                                                                                                                                                                                                                                                                                                                                                                                                                                                                                                                                                                                                                 |
| PLC              | 3.1.4.3, alpha-toxin, Clostridium oedematiens beta- and g-toxins, Clostridium oedematiens $\beta$ - and g-toxins, Clostridium welchii alpha-toxin, Clostridium welchii $\alpha$ -toxin, heat-labile haemolysin, heat-labile hemolysin, lecithinase C, lipophosphodiesterase C, lipophosphodiesterase I, phosphatidase C, phosphatidylcholine cholinephosphohydrolase, PHOSPHOINOSITIDE SPECIFIC PHOSPHOLIPASE C, Phospholipase C, Pi-plc, $\alpha$ -toxin                                                                                                                                                                                                                                                                                                             |
| RAF1             | 6430402F14RIK, AA990557, BB129353, CMD1NN, c-R, Cra, CRAF, Craf1, D83005J10RIK, leukaemia ONCOGENE HOMOLOG1, LEUKEMIA ONCOGENE HOMOLOG1, NS5, Raf-1 proto-oncogene, serine/threonine kinase, v-, v-Raf, v-raf-leukaemia viral oncogene 1, v-raf-leukemia viral oncogene 1                                                                                                                                                                                                                                                                                                                                                                                                                                                                                             |
| Serotonin        | 3-(2-aminomethyl)-1H-indol-5-ol, 3-(2-aminomethyl)indol-5-ol, 50-67-9, 5-HT, C10H12N2O, indol-5-ol, 3-(2-aminomethyl)-, serotonin                                                                                                                                                                                                                                                                                                                                                                                                                                                                                                                                                                                                                                     |
| SGSM3            | 1810012I01RIK, AA428557, BB175482, bdi1f1, CIP, CIP85, MAP, R75178, RABGAP5, RABGAPL, RUSC3, Rutbc, RUTBC3, small G protein signaling modulator 3                                                                                                                                                                                                                                                                                                                                                                                                                                                                                                                                                                                                                     |
| SP1              | 1110003E12RIK, AA450830, A1845540, Sp1-1, Sp1 transcription factor, Sp1 (trans spliced isoform), Trans-acting transcription factor 1                                                                                                                                                                                                                                                                                                                                                                                                                                                                                                                                                                                                                                  |
| SP3              | D130027J01RIK, Sp3 transcription factor, SPR2, trans-acting transcription factor 3                                                                                                                                                                                                                                                                                                                                                                                                                                                                                                                                                                                                                                                                                    |
| SRC              | ASV, AW259666, BS27, c-SRC, p60-Src, PP60, pp60c, Pp60/c-Src, pp60c-src, Rous sarcoma oncogene, SRC1, SRC proto-oncogene, non-receptor tyrosine kinase, THC6, TVHUSC                                                                                                                                                                                                                                                                                                                                                                                                                                                                                                                                                                                                  |
| TUBULIN          | microtubule, tubulin complex                                                                                                                                                                                                                                                                                                                                                                                                                                                                                                                                                                                                                                                                                                                                          |

# Pathway Analysis Using IPA Software; canonical pathway

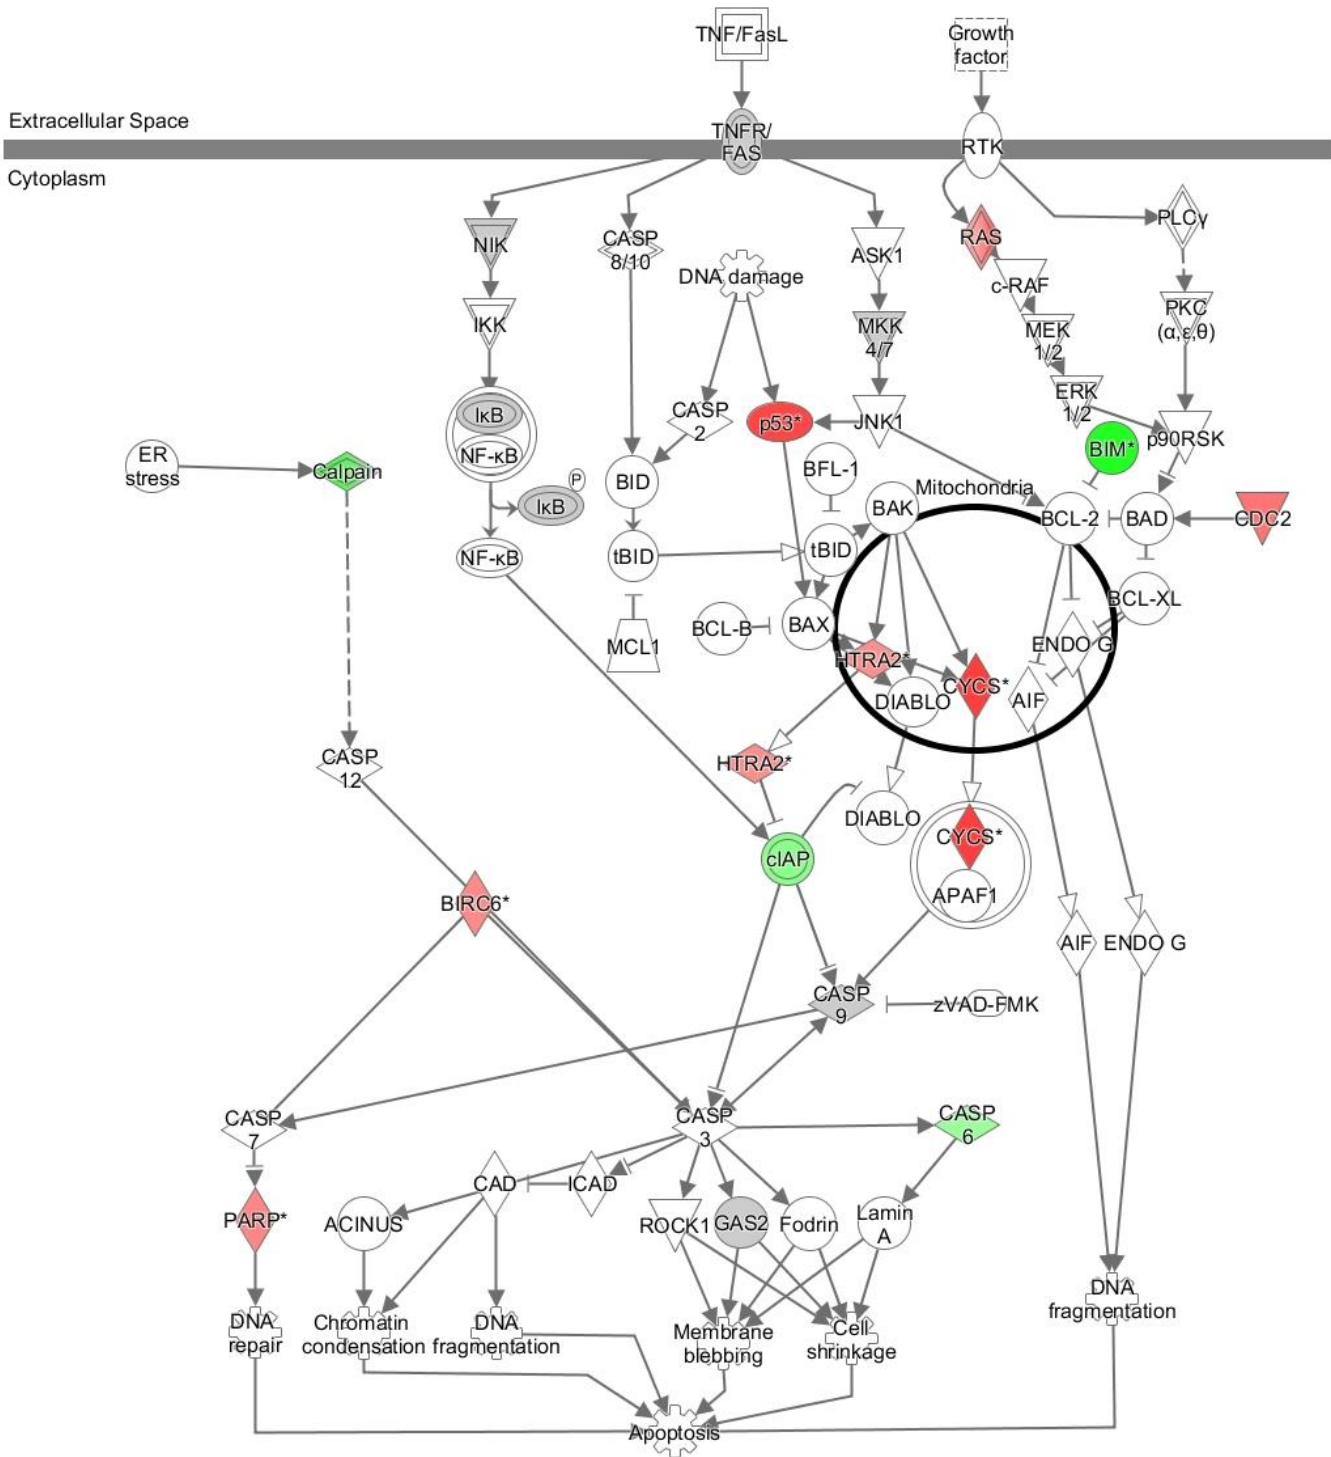

Figure S47. Apoptosis Signaling at 24 h

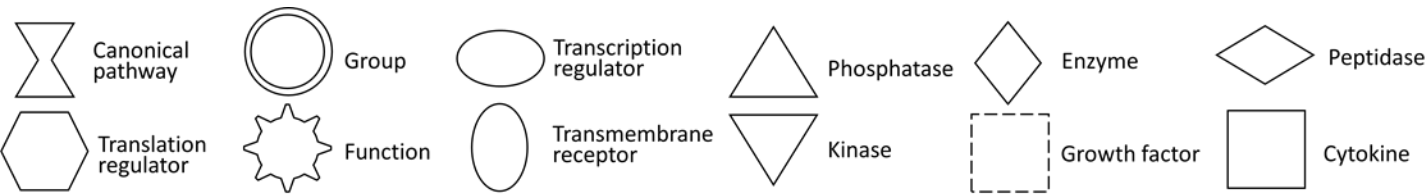

Red: Increased, FDR<0.05 versus solvent control

Green: Decreased, FDR<0.05 versus solvent control

| Symbol      | Synonym(s)                                                                                                                                                                                                                                                                                                                                                                                                              |
|-------------|-------------------------------------------------------------------------------------------------------------------------------------------------------------------------------------------------------------------------------------------------------------------------------------------------------------------------------------------------------------------------------------------------------------------------|
| ACIN1       | 26100361f19Rik, 2610510L13Rik, Ac, ACINUS, ACINUS-1, acinusL, acinusS, ACN, apoptotic chromatin condensation inducer 1, Apoptotic Chromatin Condensation Inducer In The Nucleus, C79325, fSAP152, mKIAA0670                                                                                                                                                                                                             |
| AIFM1       | A, AIF, apoptosis inducing factor mitochondria associated 1, apoptosis inducing factor, mitochondria associated 1, apoptosis-inducing factor, mitochondrion-associated 1, AUNX1, CMT2D, CMTX4, COWCK, COXPD6, DFNX5, Hq, NADMR, NAMSD, Pdcd, PDCC8, SEMDHL                                                                                                                                                              |
| APAF1       | 6230400I06RIK, Ap, Apaf1l, apoptotic peptidase activating factor 1, CED4, fog, mKIAA0413                                                                                                                                                                                                                                                                                                                                |
| Apaf1-Cycs  | Apaf1-CytoC, Cyt C-APAF1, CytochromeC-APAF1                                                                                                                                                                                                                                                                                                                                                                             |
| BAD         | A1325008, Bad v1, Bad v2, BBC2, BCL2-associated agonist of cell death, BCL2L8                                                                                                                                                                                                                                                                                                                                           |
| BAK1        | Ba, BAK, BAK-LIKE, BCL2-antagonist/killer 1, BCL2L7, CDN1, N-B, N-BAK1                                                                                                                                                                                                                                                                                                                                                  |
| BAX         | Bcl2-associated X, BCL2 associated X, apoptosis regulator, BCL2-associated X protein, BCL2L4                                                                                                                                                                                                                                                                                                                            |
| BCL-XL      | bBclxl, Bcl, BCL2L, BCL2-like 1, BCLX, Bcl-X beta, Bclx gamma, BCL-XL/S, Bcl-X β, Bclx γ, PPP1R52                                                                                                                                                                                                                                                                                                                       |
| BCL2        | AW986256, B cell leukaemia/lymphoma 2, B cell leukemia/lymphoma 2, Bcl-, Bcl2 alpha, BCL2 apoptosis regulator, BCL2, apoptosis regulator, Bcl2 α, C430015F12Rik, D630044D05RIK, D830018M01RIK, LOC100046608, ORF16, PPP1R50                                                                                                                                                                                             |
| BCL2A1      | A, A1-, A1-b, A1-d, ACC-1, ACC-2, BB218357, B cell leukaemia/lymphoma 2 related protein A1a, B cell leukaemia/lymphoma 2 related protein A1b, B cell leukaemia/lymphoma 2 related protein A1d, B cell leukemia/lymphoma 2 related protein A1b, B cell leukemia/lymphoma 2 related protein A1d, Bcl2, BCL2A1A, Bcl2a1b, BCL2A1D, BCL2L5, BCL2-related protein A1, Bfl-, Bfl-1, BFL1/A1, GRS, Hbp, HBPA1, U23778, U23781  |
| BCL2L10     | AA420380, AU023065, B, BCL2 like 10, BCL-B, Boo, C85687, D, Diva                                                                                                                                                                                                                                                                                                                                                        |
| BCL2L11     | 1500006F24RIK, BAM, BCL2 like 11, BCL2-like 11 (apoptosis facilitator), Bi, BIM, Bo, BOD, BODL, LOC150819                                                                                                                                                                                                                                                                                                               |
| BID         | 2700049M22RIK, A1875481, AU022477, BH3 interacting domain death agonist, cBid, FP497                                                                                                                                                                                                                                                                                                                                    |
| BIRC6       | A430032G04RIK, A430040A19RIK, AA501170, APOLLON, Baculoviral IAP repeat-containing 6, Bruc, BRUCE, D630005A10RIK, mKIAA1289, Ubiquitin-conjugating enzyme e2                                                                                                                                                                                                                                                            |
| c-lap       | IAP, NAIP                                                                                                                                                                                                                                                                                                                                                                                                               |
| Calpain     | CALCIUM DEPENDENT PROTEASE, M calpain                                                                                                                                                                                                                                                                                                                                                                                   |
| CASP12      | CASP12P1, CASPASE12, caspase 12 (gene/pseudogene)                                                                                                                                                                                                                                                                                                                                                                       |
| CASP2       | Casp, caspase 2, Ich-, ICH-1, Nedd, NEDD-2, PPP1R57                                                                                                                                                                                                                                                                                                                                                                     |
| CASP3       | A830040C14RIK, AC-, AC-3, Casp, Caspase-3, CASPASE-3 p20, CC3, CPP, CPP-32, CPP32B, CPP32-beta, CPP32-β, Ice-like cysteine protease, Lice, mild, mldy, SCA-1, Ya, YAMA                                                                                                                                                                                                                                                  |
| CASP6       | caspase 6, LOC103689977, mCAS, MCH2                                                                                                                                                                                                                                                                                                                                                                                     |
| CASP7       | A1314680, casp, Caspase-7, CMH-1, ICE-, ICE-IAP3, ICE-LAP3, LICE2, Lice2 cysteine protease, mCASP-7, MCH3                                                                                                                                                                                                                                                                                                               |
| CASP9       | A1115399, APAF-3, AW493809, Casp, Casp9 v1, Caspase-9, ICE-, ICE-LAP6, MCH6, PPP1R56                                                                                                                                                                                                                                                                                                                                    |
| Caspase8/10 | Casp8/10, Caspase 8,10                                                                                                                                                                                                                                                                                                                                                                                                  |
| CDK1        | CDC2, CDC28A, Cdc2a, CDC2 kinase, cyclin-dependent kinase 1, GROWTH-ASSOCIATED HISTONE H1 KINASE, p34, P34CDC2                                                                                                                                                                                                                                                                                                          |
| CYCS        | CYC, CYCSA, CYTC, CYTOC, CYTOCHROME C, cytochrome c, somatic, cytochrome c, somatic-like, ENSMUSG00000058927, HCS, LOC100363502, THC4, X laevis XLCL2                                                                                                                                                                                                                                                                   |
| DFFA        | A330085O09RIK, DFF1, DFF35, DFF-45, DNA fragmentation factor, alpha subunit, DNA fragmentation factor subunit alpha, DNA fragmentation factor subunit α, DNA fragmentation factor, α subunit, ICA, ICAD, ICAD-S                                                                                                                                                                                                         |
| DFFB        | 5730477D02RIK, C, CA, CAD, caspase-activated DNase, CPAN, DFF2, DFF-40, Didf, Diddf, DNA fragmentation factor, beta subunit, DNA fragmentation factor subunit beta, DNA fragmentation factor subunit β, DNA fragmentation factor, β subunit                                                                                                                                                                             |
| DIABLO      | 0610041G12RIK, 1700006L01RIK, AU040403, DFNA64, diablo IAP-binding mitochondrial protein, diablo, IAP-binding mitochondrial protein, Sm, SMAC                                                                                                                                                                                                                                                                           |
| ENDO G      | ENDONUCLEASE G                                                                                                                                                                                                                                                                                                                                                                                                          |
| ERK1/2      | MAPK p44/42, MAPK p44/p42, p42/44 mapk, P42/p44 erk, P42/p44 mapk, p42/p44 MAP KINASE                                                                                                                                                                                                                                                                                                                                   |
| GAS2        | Gas, growth arrest-specific 2, RGD1563167                                                                                                                                                                                                                                                                                                                                                                               |
| HTRA2       | A1481710, Htr, HtrA serine peptidase 2, MGCA8, mnd, mnd2, O, OMI, PARK13, Pr, PRSS25                                                                                                                                                                                                                                                                                                                                    |
| Ikβ         | I KAPPA B, Ikbeta, Iκβ, Iκ-B                                                                                                                                                                                                                                                                                                                                                                                            |
| IkB-NfκB    | IkappaB-NFkappaB, IκB-NFκB, NFκB-IκB                                                                                                                                                                                                                                                                                                                                                                                    |
| IKK         | I Kappa B Kinase, IKKALPHABETA, IKK Complex, I κ B Kinase                                                                                                                                                                                                                                                                                                                                                               |
| LMNA        | CDCD1, CDDC, CMD1A, CMT2B1, Dhe, EMD2, FPL, FPLD, FPLD2, HGPS, IDC, lamin A, LAMIN A/C, LAMININ A/C, LDP1, LFP, LGMD1B, LMN1, LMNC, LMNL1, MADA, Prelamin-A/C, PRO1                                                                                                                                                                                                                                                     |
| MAP2K1/2    | MEK1/2, MKK1/2                                                                                                                                                                                                                                                                                                                                                                                                          |
| MAP2K4/7    | Jnkk, MEK 4/7, MKK 4/7                                                                                                                                                                                                                                                                                                                                                                                                  |
| MAP3K5      | 7420452D20RIK, A, APOPTOSIS SIGNAL REGULATED KINASE 1, AS, ASK, ASK1, M3K5, MAPKKK5, MEKK5, mitogen-activated protein kinase kinase kinase 5, RGD1306565                                                                                                                                                                                                                                                                |
| MAPK8       | A1849689, C-JUN N-TERMINAL KINASE1, JNK, JNK1, JNK1A2, JNK21B1/2, JNK-46, mitogen-activated protein kinase 8, p46JNK1, p46JNK1 alpha, p46JNK1 α, Prk, PRKM8, SAPK1, SAPK1c, Sapk gamma, SAPP P46, Sapk γ, STRESS-ACTIVATED protein KINASE-LIKE KINASE                                                                                                                                                                   |
| MCL1        | AW556805, BCL2L3, EAT, Mcl-, MCL1 apoptosis regulator, BCL2 family member, mcl1/EAT, myeloid cell leukaemia sequence 1, myeloid cell leukemia sequence 1, TM                                                                                                                                                                                                                                                            |
| NFκB        | NF-KAPPA B, NF-κ B, nuclear factor-κ b, transcription factor nuclear factor κ b                                                                                                                                                                                                                                                                                                                                         |
| Parp1       | 5830444G22RIK, A, Adp, Adprp, Adprp1, ADPRT, ADPRT 1, A1893648, ARTD1, C80510, msPARP, pa, pADPRT-1, PARP, PARS, POLY(ADP-RIBOSE) POLYMERASE 1, poly (ADP-ribose) polymerase family, member 1, PPOL, sP, sPARP-1                                                                                                                                                                                                        |
| PKC(α,ε,θ)  | PKC (alpha, epsilon, theta), PKC (α,ε,θ)                                                                                                                                                                                                                                                                                                                                                                                |
| PLC-gamma   | Phospholipase C gamma, Phospholipase C γ, PLCG, PLCγ                                                                                                                                                                                                                                                                                                                                                                    |
| RAF1        | 6430402F14RIK, AA990557, BB129353, CMD1NN, c-R, Cra, CRAF, Cra1, D830050J10RIK, leukaemia ONCOGENE HOMOLOG1, LEUKEMIA ONCOGENE HOMOLOG1, NS5, Raf-1 proto-oncogene, serine/threonine kinase, v-, v-Raf, v-raf-leukaemia viral oncogene 1, v-raf-leukemia viral oncogene 1                                                                                                                                               |
| ROCK1       | 1110055K06RIK, LOC100129157, P160ROCK, p160 ROCK-1, Rho-associated coiled-coil containing protein kinase 1, Roc, ROCK, ROCK-1, ROK, ROK beta, ROK β                                                                                                                                                                                                                                                                     |
| RPS6KA1     | HU-1, MAPKAPK1, MAPKAPK1A, MAPKAP kinase 1, MAPKAP Kinase 1 Alpha, MAPKAP Kinase 1 α, p90Rsk, p90-RSK 1, p90S6K, RIBOSOMAL protein S6 KINASE A, ribosomal protein S6 kinase A1, ribosomal protein S6 kinase polypeptide 1, Rs, RSK, RSK1, S6K-alpha-1, S6K-α-1                                                                                                                                                          |
| SPTAN1      | 2610027H02RIK, A2a, Alpha fodrin, (alpha)II-SPECTRIN, Alphall spectrin, Alpha-spectrin, Alpha spectrin, alpha SPECTRIN 2, DEE5, EIEE5, Fodrin, IPF, NEAS, S, Sp, Spectrin alpha 2, spectrin alpha, non-erythrocytic 1, spectrin, alpha, non-erythrocytic 1, Spectrin α 2, spectrin α, non-erythrocytic 1, spectrin, α, non-erythrocytic 1, SPNA2, SPTA2, α fodrin, (α)II-SPECTRIN, α-spectrin, α spectrin, α SPECTRIN 2 |
| TP53        | bb1, BCC7, bfy, bhy, BMFS5, LFS1, p4, p44, p5, P53, P53 cellular tumour antigen, p53 tumor suppressor, transformation related protein 53, TRP53, tumor protein p53, tumour protein p53                                                                                                                                                                                                                                  |
| zVAD-FMK    | benzyloxycarbonyl-VAD-fluoromethyl ketone, N-benzyloxycarbonyl-Val-Ala-Asp-fluoromethyl ketone, ZVAD, z-VAD.FMK                                                                                                                                                                                                                                                                                                         |

## Pathway Analysis Using IPA Software; canonical pathway

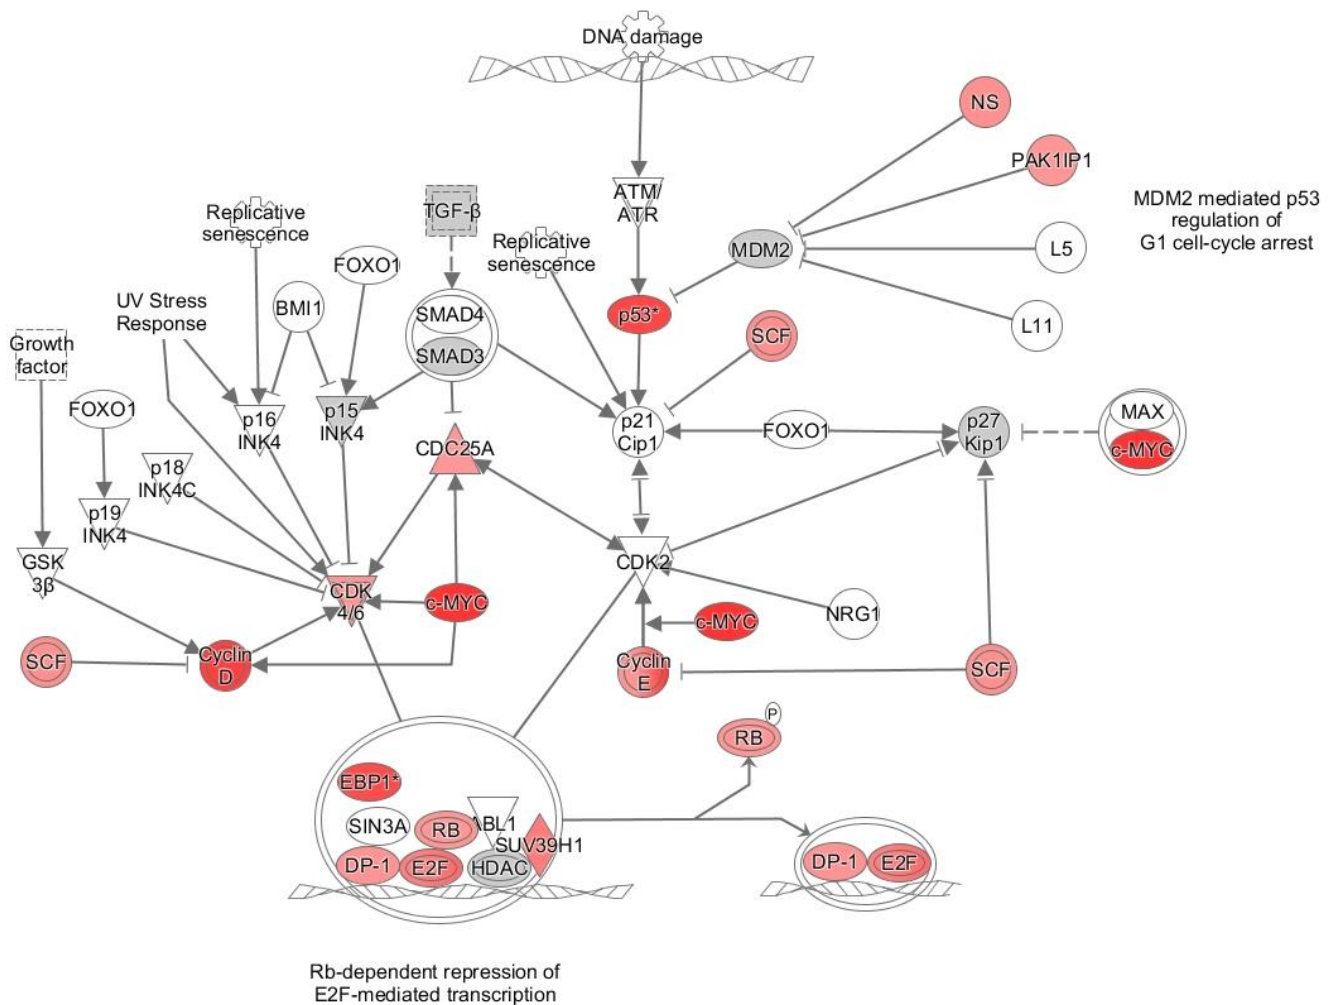

Figure S48. Cell Cycle G1/S Checkpoint Regulation at 24 h

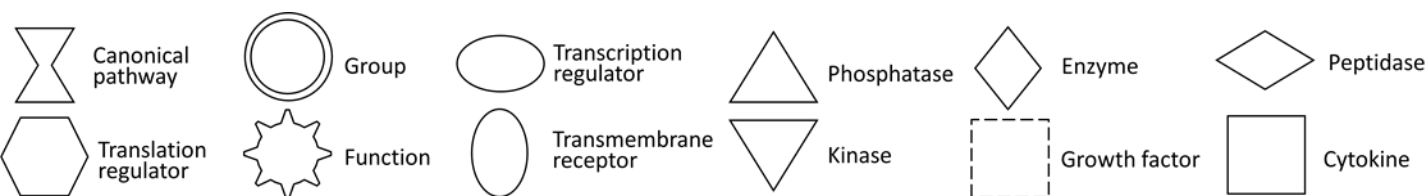

Red: Increased, FDR<0.05 versus solvent control

Green: Decreased, FDR<0.05 versus solvent control

| Symbol                        | Synonym(s)                                                                                                                                                                                                                                                                                                                                                                              |
|-------------------------------|-----------------------------------------------------------------------------------------------------------------------------------------------------------------------------------------------------------------------------------------------------------------------------------------------------------------------------------------------------------------------------------------|
| ABL1                          | ABL, ABL proto-oncogene 1, non-receptor tyrosine kinase, A1325092, BCR-ABL, c-A, c-ABL, CABL1, c-abl oncogene 1, non-receptor tyrosine kinase, CHDSKM, E430008G22Rik, JTK7, LOC100909750, p145Abl, p150, tyrosine-protein kinase ABL1-like, v-abl                                                                                                                                       |
| ATM/ATR                       | ATR/ATM                                                                                                                                                                                                                                                                                                                                                                                 |
| BM1                           | AW546694, Bmi-, BM1 proto-oncogene, polycomb ring finger, FLV12/BM1, Pcgf, PCGF4, RNF51                                                                                                                                                                                                                                                                                                 |
| CDC25A                        | CDC25A2, cell division cycle 25A, D9Erttd393, D9Erttd393e                                                                                                                                                                                                                                                                                                                               |
| CDK2                          | A630093N05Rik, CDC2-RELATED KINASE, CDKN2, Cyclin A associated kinase, cyclin-dependent kinase 2, CYCLIN E ASSOCIATED KINASE, p33(CDK2)                                                                                                                                                                                                                                                 |
| CDKN1A                        | CAP, CAP20, CDK, CDKI, Cdkn, CDKN1, CDKNA1, Cl, CIP1, cyclin-dependent kinase inhibitor 1A, cyclin-dependent kinase inhibitor 1A (P21), mda, MDA-6, P2, P21, p21C, p21Cip, p21CIP1, p21W, p21WAF, p21Waf1, Pz1 Cyclin-Dependent Kinase Inhibitor, SD, SDI1, UV96, Waf, WAF1                                                                                                             |
| CDKN1B                        | AA408329, A1843786, Cdk1b, CDKN4, cyclin-dependent kinase inhibitor 1B, CYCLIN-DEPENDENT KINASE INHIBITOR P27, KIP1, MEN1B, MEN4, p2, p27, p27K, P27kip, P27KIP1, P28-ICK                                                                                                                                                                                                               |
| CDKN2A                        | A, Arf, ARF-INK4a, CDK4l, CDKN2, CMM2, CYCLIN-DEPENDENT KINASE INHIBITOR 2A, INK4, INK4A, INK4a-ARF, Ink4a/Arf, MLM, MTS, MTS-1, p1, p14ARF/ p16INK4a, p16, p16/ARF, p16Cdkn2a, p16l, p16 INK4, p16/ INK4a, P19, p19ARF, Pct, PCTR1, TP16                                                                                                                                               |
| CDKN2B                        | AV083695, CDK4l, cyclin-dependent kinase inhibitor 2B, INK4B, MTS, MTS2, p1, P15, p15IN, p15INK4, p15INK4b, p15(INK4b)                                                                                                                                                                                                                                                                  |
| CDKN2C                        | C77269, CDKN6, cyclin-dependent kinase inhibitor 2C, INK, INK4C, p1, p18, p18IN, p18-INK4C, p18-INK6                                                                                                                                                                                                                                                                                    |
| CDKN2D                        | cyclin dependent kinase inhibitor 2D, INK, INK4D, p1, p19, p19IN, p19-INK4D                                                                                                                                                                                                                                                                                                             |
| CyclinD                       | CycD, Cyclin D1                                                                                                                                                                                                                                                                                                                                                                         |
| E2f-T1dp1                     | E2F-DP1                                                                                                                                                                                                                                                                                                                                                                                 |
| FOXO1                         | Afx, Afxh, A1876417, FKX, FKHI, FKHR, FKHR1, Forkhead, forkhead box O1, Fox, FOXO1A                                                                                                                                                                                                                                                                                                     |
| GNL3                          | C77032, E2IG3, G protein nucleolar 3, guanine nucleotide binding protein-like 3 (nucleolar), NNP47, NS, NUCLEOSTEMIN, NUG1                                                                                                                                                                                                                                                              |
| GSK3B                         | 7330414F15Rik, 8430431H08Rik, C86142, glycogen synthase kinase 3 beta, glycogen synthase kinase 3 $\beta$ , GSK-, GSK-3, GSK-3be, GSK-3beta, GSK-3 $\beta$ , GSKbeta, GSK $\beta$ , Tpk1                                                                                                                                                                                                |
| HDAC                          | Histone Deacetylase, Histone deacetyltransferase                                                                                                                                                                                                                                                                                                                                        |
| MAX                           | AA960152, A1875693, bHLHd, bHLHd4, bHLHd5, bHLHd6, bHLHd7, bHLHd8, Max protein, MYC associated factor X, Myn                                                                                                                                                                                                                                                                            |
| Max-Myc                       | cMyc-MAX, Myc-MAX                                                                                                                                                                                                                                                                                                                                                                       |
| MDM2                          | 1700007J15Rik, AA415488, ACTFS, hdm2, HDMX, LSKB, MDM2-A1, MDM2 proto-oncogene, MGC5370, Transformed 3t3 cell double minute 2, transformed mouse 3T3 cell double minute 2                                                                                                                                                                                                               |
| MYC                           | AU016757, bHLHe3, bHLHe39, CMYC, C-MYC-P64, mMyc, MRTL, Myc2, MYCC, MYC proto-oncogene, bHLH transcription factor, myelocytomatosis oncogene, N, Niard, Nird, RNCMYC                                                                                                                                                                                                                    |
| NRG1                          | 6030402G23RIK, ARIA, D230005F13Rik, GGF, GGFII, GP30, hereg, Heregulin, HG, HGL, HR, HRG, HRG1, HRGA, HRGalpha, Hrg $\alpha$ , MST131, MSTP131, NAF, ND, NDF, Nd44, Neuregulin 1, Nrg1a 44 kda isoform, Nrg1 $\alpha$ 2c, NRG1B1, Nrg1 isoform 7, NRG1-IT2, NRG1 SECRETED, Nrg1 $\alpha$ 2c, Nrg alpha, Nrg alpha 2c, Nrg beta, Nrg $\alpha$ , Nrg $\alpha$ 2c, Nrg $\beta$ , SMD, SMDf |
| PA2G4                         | AA672939, Ebp, EBP1, HG4-1, P, p38-2G4, P1lap, proliferation-associated 2G4, Proliveration-associated protein 1                                                                                                                                                                                                                                                                         |
| PAK1IP1                       | 5830431I15Rik, 5930415H02Rik, AA419825, A1314040, AW556169, bA421M1.5, Gdpd, Gdpd1, hPIP1, MAK11, P, PAK1 interacting protein 1, PIP1, Riken cDNA 5830431i15, WDR84                                                                                                                                                                                                                     |
| RB                            | pRb, Rb Tumor Suppressor, Rb tumour Suppressor                                                                                                                                                                                                                                                                                                                                          |
| Rb-E2Ftranscriptionrepression | Rb1-E2F1, Rb-E2F, Rb-E2F1                                                                                                                                                                                                                                                                                                                                                               |
| RPL11                         | 2010203J19RIK, DBA7, GIG34, L11, ribosomal protein L11, uL5                                                                                                                                                                                                                                                                                                                             |
| RPL5                          | L5, MSTP030, PPP1R135, ribosomal L5, Ribosomal protein l1a, ribosomal protein L5, U21, U21RNA, uL18                                                                                                                                                                                                                                                                                     |
| SCF                           | SCF complex                                                                                                                                                                                                                                                                                                                                                                             |
| SIN3A                         | AW553200, mKIAA4126, mS, MSIN3A, S, SIN3, SIN3 transcription regulator family member A, transcriptional regulator, SIN3A (yeast), WITKOS                                                                                                                                                                                                                                                |
| SMAD3                         | AU022421, DKFZP586N0721, hMAD-3, HSPC193, HsT17436, JV15-2, LDS1C, LDS3, MAD3, Madh, MADH3, SMAD family member 3                                                                                                                                                                                                                                                                        |
| SMAD4                         | AW743858, D18Wsu70, D18Wsu70e, DPC, DPC4, JIP, Madh, MADH4, MYHRS, SMAD family member 4, Smaug1                                                                                                                                                                                                                                                                                         |
| SUV39H1                       | A1852103, AL022883, DXHXS7466, DXHXS7466e, H3-K9-HMTase 1, KMT1, KMT1A, MG44, ml, mIS6, RGD1565028, suppressor of variegation 3-9 1, suppressor of variegation 3-9 homolog 1, suppressor of variegation 3-9 homolog 1 (Drosophila)-like 1, SUV39H, Suv39h111                                                                                                                            |
| TFDP1                         | DILC, Dp, DP-1, Drf, DRTF1, TB2/DP1, transcription factor Dp-1                                                                                                                                                                                                                                                                                                                          |
| Tgfbeta                       | Tgfb, TGF-beta 1, 2, and 3, TGF $\beta$ , TGF- $\beta$ 1, 2, and 3, transforming growth factor- $\beta$                                                                                                                                                                                                                                                                                 |
| TP53                          | bb1, BCC7, bfy, bhy, BMFS5, LFS1, p4, p44, p5, P53, P53 cellular tumour antigen, p53 tumor suppressor, transformation related protein 53, TRP53, tumor protein p53, tumour protein p53                                                                                                                                                                                                  |

# Pathway Analysis Using IPA Software; canonical pathway

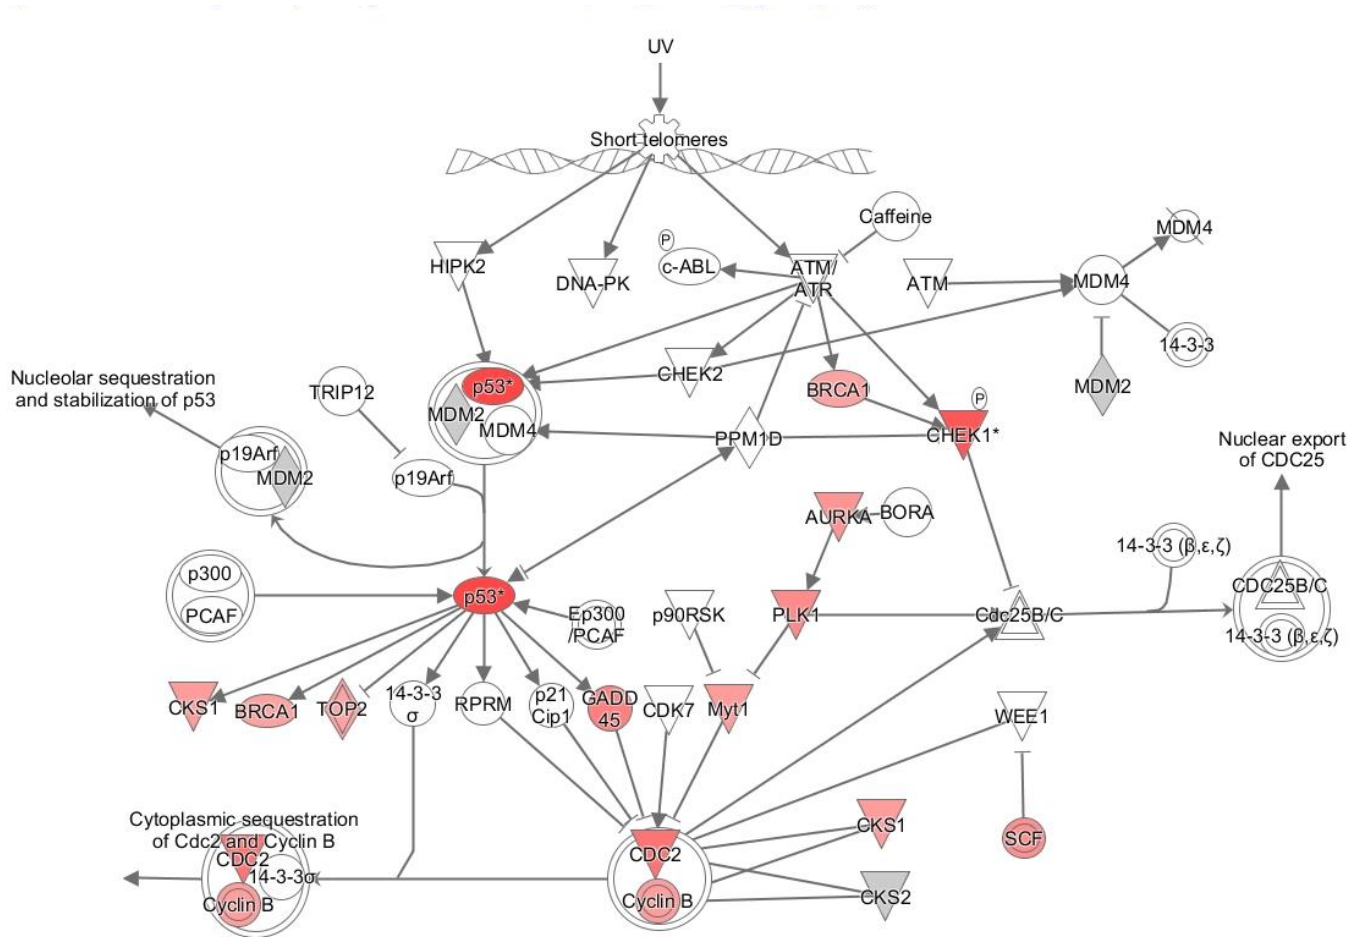

Figure S49. Cell Cycle G2/M DNA Damage Checkpoint Regulation at 24 h

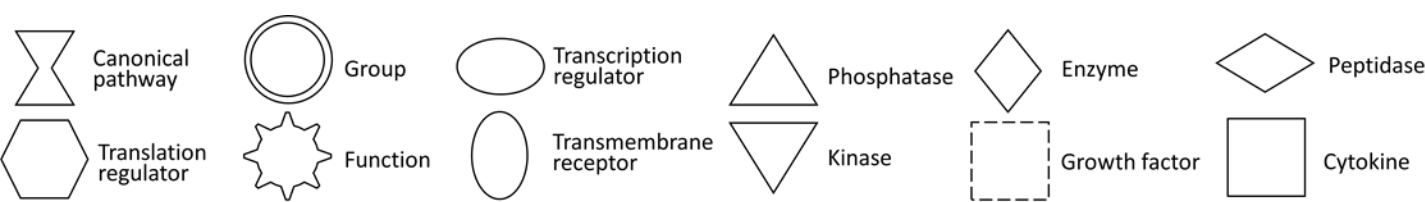

Red: Increased, FDR<0.05 versus solvent control

Green: Decreased, FDR<0.05 versus solvent control

| Symbol        | Synonym(s)                                                                                                                                                                                                                                                                                                                                                                                                                                                                                                                                                                                                                                                                                                                                                                                                                                                                                                       |
|---------------|------------------------------------------------------------------------------------------------------------------------------------------------------------------------------------------------------------------------------------------------------------------------------------------------------------------------------------------------------------------------------------------------------------------------------------------------------------------------------------------------------------------------------------------------------------------------------------------------------------------------------------------------------------------------------------------------------------------------------------------------------------------------------------------------------------------------------------------------------------------------------------------------------------------|
| 14-3-3        | CBP                                                                                                                                                                                                                                                                                                                                                                                                                                                                                                                                                                                                                                                                                                                                                                                                                                                                                                              |
| 14-3-3(β,ε,ζ) | 14-3-3 (beta, epsilon, zeta), 14-3-3 (β,ε,ζ)                                                                                                                                                                                                                                                                                                                                                                                                                                                                                                                                                                                                                                                                                                                                                                                                                                                                     |
| ABL1          | ABL, ABL proto-oncogene 1, non-receptor tyrosine kinase, A1325092, BCR-ABL, c-A, c-ABL, CABL1, c-abl oncogene 1, non-receptor tyrosine kinase, CHDSKM, E430008G22Rik, JTK7, LOC100909750, p145Abl, p150, tyrosine-protein kinase ABL1-like, v-abl                                                                                                                                                                                                                                                                                                                                                                                                                                                                                                                                                                                                                                                                |
| ATM           | A1256621, AT1, ATA, ataxia telangiectasia mutated, ATC, ATD, ATDC, ATE, ATM serine/threonine kinase, C030026E19RIK, TEL1, TELO1                                                                                                                                                                                                                                                                                                                                                                                                                                                                                                                                                                                                                                                                                                                                                                                  |
| ATM/ATR       | ATR/ATM                                                                                                                                                                                                                                                                                                                                                                                                                                                                                                                                                                                                                                                                                                                                                                                                                                                                                                          |
| AURKA         | AI, AIK, AIRK1, Ar, ARK-1, Au, AU019385, AURA, AURORA 2, AURORA A, AURORA KINASE, aurora kinase A, Aurora Related Kinase1, AW539821, Ayk, Ayk1, BTAK, I, IA, IAK, IAK1, PPP1R47, Stk, STK15, STK6, STK7                                                                                                                                                                                                                                                                                                                                                                                                                                                                                                                                                                                                                                                                                                          |
| BORA          | 6720463M24Rik, A1317232, BORA aurora kinase A activator, bora, aurora kinase A activator, C13orf34, RGD1309522                                                                                                                                                                                                                                                                                                                                                                                                                                                                                                                                                                                                                                                                                                                                                                                                   |
| BRCA1         | BRCA1 DNA repair associated, BRCA1, DNA repair associated, BRCAI, BRCC1, breast cancer 1, early onset, BROVCA1, FANCS, PNCA4, PPP1R53, PSCP, RNF53                                                                                                                                                                                                                                                                                                                                                                                                                                                                                                                                                                                                                                                                                                                                                               |
| Caffeine      | 1,3,7-trimethylpurine-2,6-dione, 1H-purine-2,6-dione, 3,7-dihydro-1,3,7-trimethyl-, 58-08-2, 69-22-7, 8000-95-1, Alert-Pep, C8H10N4O2, Cafamil, Calcit, Cafecon, Caffedrine, Caffedrine Caplets, Caffeine Anhydrous, caffeine citrate, Caffeine-Sodium Benzoate, Caffeine, Cafipel, Coffein, Coffeine, Darvon Compound, Dasin, Dexitac, Dexitac Stay Alert Stimulant, Dhc Plus, Diurex, Durvitan, Eldiatric C, Enerjets, Ercatab, Gencebok, Guaranine, Hycomine, Invagesic, Invagesic Forte, Keep Alert, Kofein, Koffein, Lanorinal, Mateina, Maximum Strength Snapback Stimulant Powders, Medigesic Plus, methyltheobromine, Migergot, Miudol, Natural Caffeinum, Nix Nap, Nodaca, No-Doz, Nodoz Maximum Strength Caplets, Organex, Pep-Back, Peyona, Phensal, Propoxyphene Compound-65, Quick Pep, Refresh'n, SK 65 Compound, Stim, Thein, Theine, Ultra Pep-Back, Vivarin, Wake-Up, xanthine, 1,3,7-trimethyl |
| CDK1          | CDC2, CDC28A, Cdc2a, CDC2 kinase, cyclin-dependent kinase 1, GROWTH-ASSOCIATED HISTONE H1 KINASE, p34, P34CDC2                                                                                                                                                                                                                                                                                                                                                                                                                                                                                                                                                                                                                                                                                                                                                                                                   |
| CDK1-Cyclin B | Cdc2-CyclinB                                                                                                                                                                                                                                                                                                                                                                                                                                                                                                                                                                                                                                                                                                                                                                                                                                                                                                     |
| CDK7          | A1323415, A1528512, C230069N13, CAK, CAK1, Cdkn, CDKN7, Crk, Crk4, cyclin-dependent kinase 7, ENSMUSG00000074700, HCAK, MO15, p39MO15, STK1                                                                                                                                                                                                                                                                                                                                                                                                                                                                                                                                                                                                                                                                                                                                                                      |
| CDKN1A        | CAP, CAP20, CDK, CDKI, Cdkn, CDKN1, CDKN1A, Cl, CIP1, cyclin-dependent kinase inhibitor 1A, cyclin-dependent kinase inhibitor 1A (P21), mda, MDA-6, P2, P21, p21C, p21Cip, p21CIP1, p21W, p21WAF, p21Waf1, Pz1 Cyclin-Dependent Kinase Inhibitor, SD, SDI1, UV96, Waf, WAF1                                                                                                                                                                                                                                                                                                                                                                                                                                                                                                                                                                                                                                      |
| CHEK1         | C85740, checkpoint kinase 1, CHK1, rad27                                                                                                                                                                                                                                                                                                                                                                                                                                                                                                                                                                                                                                                                                                                                                                                                                                                                         |
| CHEK2         | CD51, Check2, checkpoint kinase 2, CHK2, hCds1, HUCDS1, LFS2, PP1425, Rad, RAD53                                                                                                                                                                                                                                                                                                                                                                                                                                                                                                                                                                                                                                                                                                                                                                                                                                 |
| CKS1B         | 2410005G18Rik, 2610005D03Rik, AA407784, CDC28 protein kinase 1b, CDC28 protein kinase regulatory subunit 1B, CDC28 REGULATORY subunit 1B, Cks, CKS1, cks1s1, PNAS-16, PNAS-18, RGD1561797, sid1334, Sid1334p, Suc1                                                                                                                                                                                                                                                                                                                                                                                                                                                                                                                                                                                                                                                                                               |
| CKS2          | 1110038L14Rik, CDC28 protein KINASE REGULATORY subunit 2, CDC28 REGULATORY subunit 2, CKSH, CKSHS2, P13SUC1, RGD1562047                                                                                                                                                                                                                                                                                                                                                                                                                                                                                                                                                                                                                                                                                                                                                                                          |
| EP300         | A430090G16, A730011L11, E1A binding protein p300, KAT3, KAT3B, MKHK2, p30, p300, p300 HAT, RSTS2                                                                                                                                                                                                                                                                                                                                                                                                                                                                                                                                                                                                                                                                                                                                                                                                                 |
| GADD45A       | AA545191, Ddit, DDIT1, Gadd, GADD45, GADD45 alpha, GADD45α, growth arrest and DNA-damage-inducible 45 alpha, growth arrest and DNA-damage-inducible 45 α, Growth arrest and DNA-damage-inducible 45, α, growth arrest and DNA damage inducible alpha, growth arrest and DNA-damage-inducible, alpha, growth arrest and DNA damage inducible α, growth arrest and DNA-damage-inducible, α                                                                                                                                                                                                                                                                                                                                                                                                                                                                                                                         |
| HIPK2         | 1110014O20RIK, B230339E18RIK, homeodomain interacting protein kinase 2, LOC100505582, LOC653052, PRO0593, St, Stank                                                                                                                                                                                                                                                                                                                                                                                                                                                                                                                                                                                                                                                                                                                                                                                              |
| KAT2B         | A930006P13RIK, A1461839, AW536563, CAF, K(lysine) acetyltransferase 2B, lysine acetyltransferase 2B, Pc, PCAF, P/CAF, Pcaf-b                                                                                                                                                                                                                                                                                                                                                                                                                                                                                                                                                                                                                                                                                                                                                                                     |
| MDM2          | 1700007J15Rik, AA415488, ACTFS, hdm2, HDMX, LSKB, MDM2-A1, MDM2 proto-oncogene, MGC5370, Transformed 3t3 cell double minute 2, transformed mouse 3T3 cell double minute 2                                                                                                                                                                                                                                                                                                                                                                                                                                                                                                                                                                                                                                                                                                                                        |
| MDM4          | 4933417N07RIK, AA414968, AL023055, AU018793, AU021806, BMFS6, C85810, HDMX, LOC102633382, MDM4 regulator of p53, MDMX, MRP1, transformed mouse 3T3 cell double minute 4                                                                                                                                                                                                                                                                                                                                                                                                                                                                                                                                                                                                                                                                                                                                          |
| p19 Arf       | A, Arf, ARF-INK4a, CDK4l, CDKN2, CMM2, CYCLIN-DEPENDENT KINASE INHIBITOR 2A, INK4, INK4A, INK4a-ARF, Ink4a/Arf, MLM, MTS, MTS-1, p1, p14ARF/ p16INK4a, p16, p16/ARF, p16Cdkn2a, p16l, p16 INK4, p16/ INK4a, P19, p19ARF, Pct, PCTR1, TP16                                                                                                                                                                                                                                                                                                                                                                                                                                                                                                                                                                                                                                                                        |
| PKMYT1        | 6230424P17, AW209059, MYT1, PPP1R126, protein kinase, membrane associated tyrosine/threonine 1, RGD1305434                                                                                                                                                                                                                                                                                                                                                                                                                                                                                                                                                                                                                                                                                                                                                                                                       |
| PLK1          | P, PLK, polo-like kinase 1, STPK, STPK13                                                                                                                                                                                                                                                                                                                                                                                                                                                                                                                                                                                                                                                                                                                                                                                                                                                                         |
| PPM1D         | AV338790, IDDGP, JDVS, PP2C-DELTA, PP2C-δ, Ppm1d predicted, protein phosphatase 1D magnesium-dependent, delta isoform, protein phosphatase 1D magnesium-dependent, δ isoform, protein phosphatase, Mg2+/Mn2+ dependent 1D, protein phosphatase, Mg2+/Mn2+ dependent, 1D, PTP delta P1, PTP δ P1, Wi, WIP1                                                                                                                                                                                                                                                                                                                                                                                                                                                                                                                                                                                                        |
| PRKDC         | A1326420, AU019811, DNA-, DNA-DEPENDENT protein KINASE, DNAPDcs, DNAPK, DNA-PKC, DNA-PKcs, DNPk1, DOX, DOXNPH, dxn, dxnph, HYRC, HYRC1, IMD26, p350, p460, Prkdc predicted, protein kinase, DNA activated, catalytic polypeptide, protein kinase, DNA-activated, catalytic subunit, scid, slip, XRCC, XRCC7                                                                                                                                                                                                                                                                                                                                                                                                                                                                                                                                                                                                      |
| RPRM          | 2410012A13Rik, Re, REPRIMO, reprimo, TP53 dependent G2 arrest mediator candidate, reprimo, TP53 dependent G2 arrest mediator homolog                                                                                                                                                                                                                                                                                                                                                                                                                                                                                                                                                                                                                                                                                                                                                                             |
| RPS6KA1       | HU-1, MAPKAPK1, MAPKAPK1A, MAPKAP kinase 1, MAPKAP Kinase 1 Alpha, MAPKAP Kinase 1 α, p90Rsk, p90-RSK 1, p90S6K, RIBOSOMAL protein S6 KINASE A, ribosomal protein S6 kinase A1, ribosomal protein S6 kinase polypeptide 1, Rs, RSK, RSK1, S6K-alpha-1, S6K-α-1                                                                                                                                                                                                                                                                                                                                                                                                                                                                                                                                                                                                                                                   |
| SCF           | SCF complex                                                                                                                                                                                                                                                                                                                                                                                                                                                                                                                                                                                                                                                                                                                                                                                                                                                                                                      |
| SFN           | 14-3-3, 14-3-3 Sigma, 14-3-3 σ, E, ER, HME1, Mme1, Stratifin, Ywh, YWHAS                                                                                                                                                                                                                                                                                                                                                                                                                                                                                                                                                                                                                                                                                                                                                                                                                                         |
| TOP2          | DNA Topoisomerase II, Topo II, Topoisomerase II                                                                                                                                                                                                                                                                                                                                                                                                                                                                                                                                                                                                                                                                                                                                                                                                                                                                  |
| TP53          | bb1, BCC7, bfy, bhy, BMFS5, LFS1, p4, p44, p5, P53, P53 cellular tumour antigen, p53 tumor suppressor, transformation related protein 53, TRP53, tumor protein p53, tumour protein p53                                                                                                                                                                                                                                                                                                                                                                                                                                                                                                                                                                                                                                                                                                                           |
| TRIP12        | 1110036I07RIK, 6720416K24RIK, AA410158, Gtl, GTL6, KIAA0045, MRD49, thyroid hormone receptor interactor 12, TRIPC, ULF                                                                                                                                                                                                                                                                                                                                                                                                                                                                                                                                                                                                                                                                                                                                                                                           |
| WEE1          | WEE1A, Wee1b, WEE1 G2 checkpoint kinase, WEE 1 homolog 1 (S. pombe), WEE1hu, WEE1-LIKE protein KINASE                                                                                                                                                                                                                                                                                                                                                                                                                                                                                                                                                                                                                                                                                                                                                                                                            |



# Pathway Analysis Using IPA Software; canonical pathway

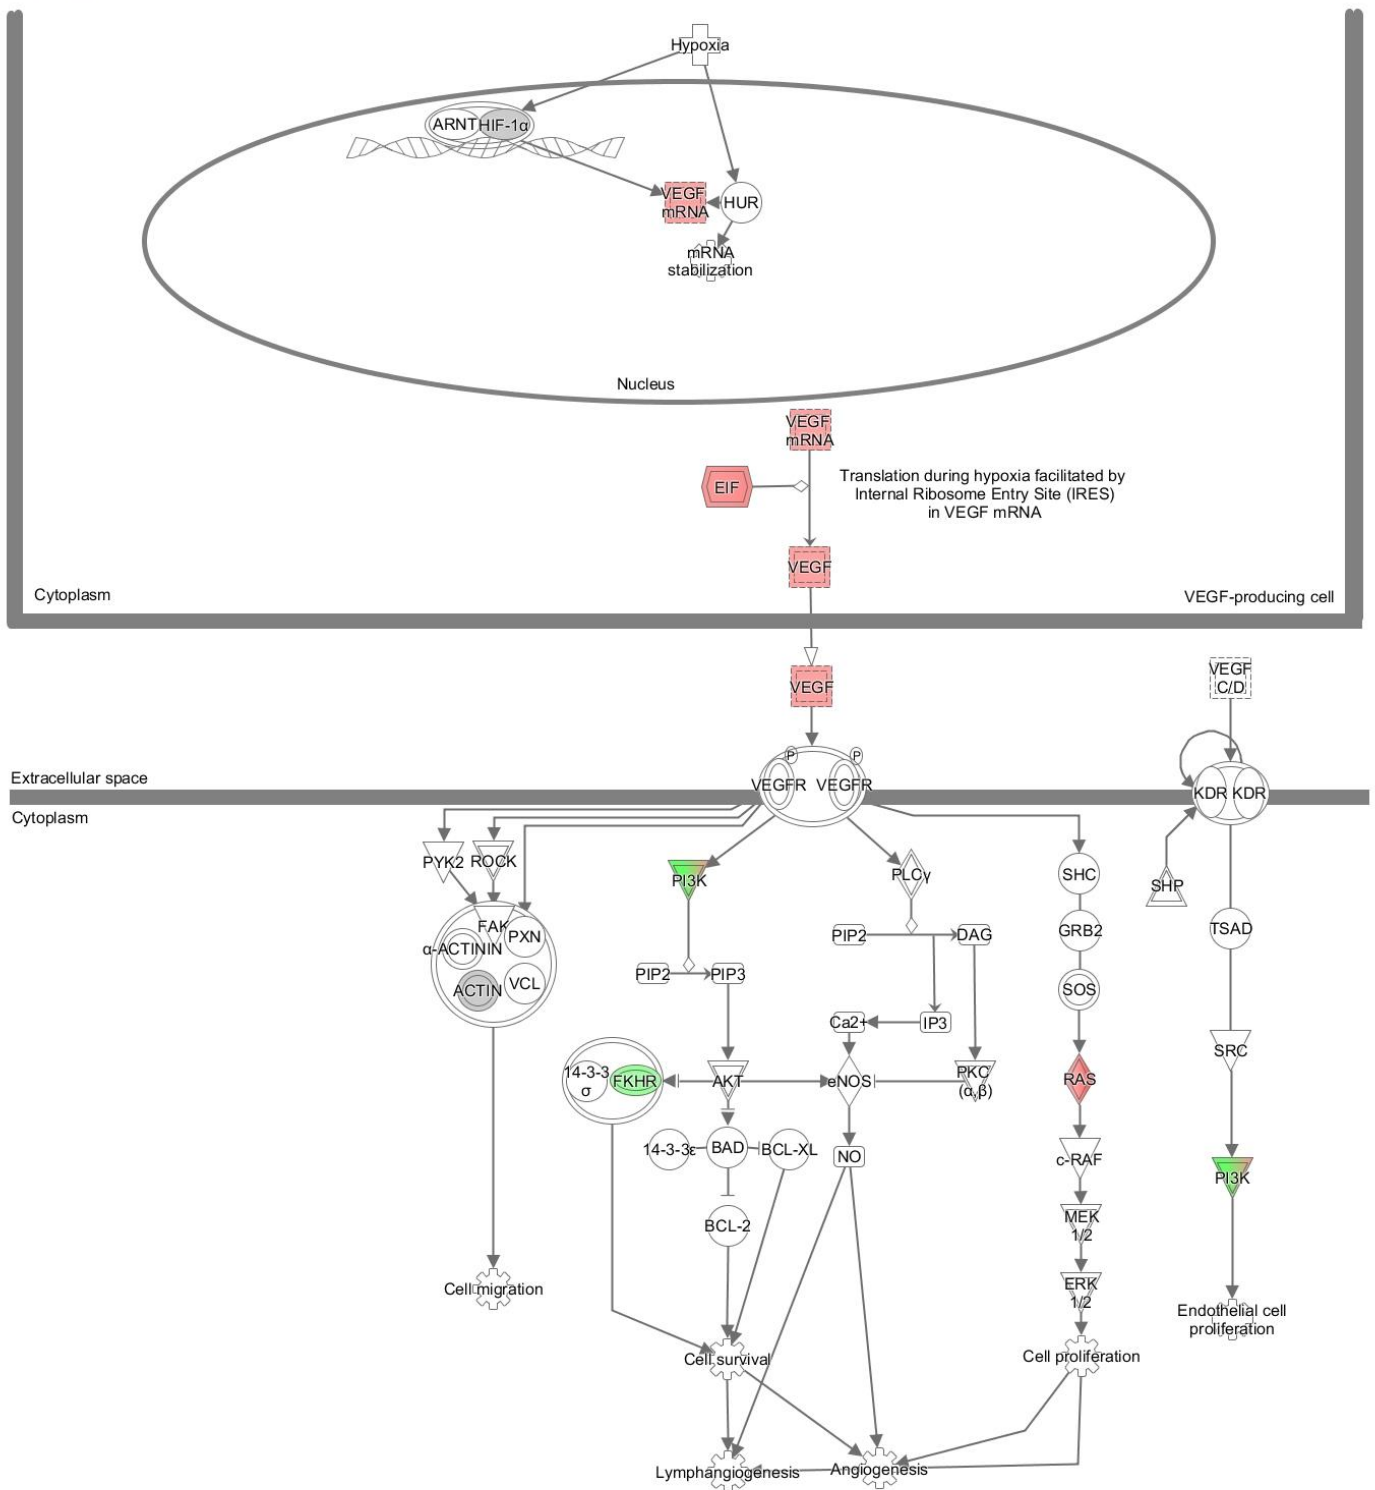

Figure S50. VEGF Signaling at 24 h

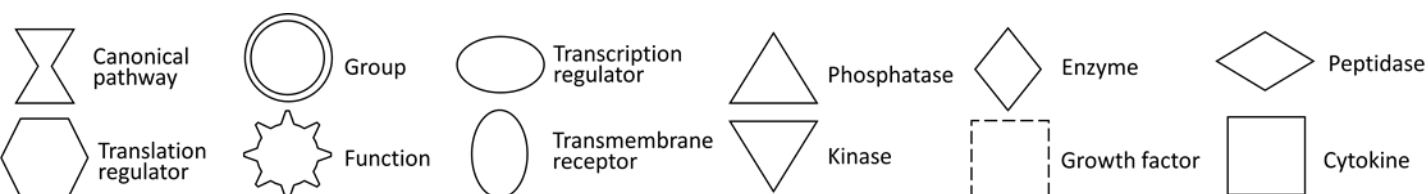

Red: Increased, FDR<0.05 versus solvent control

Green: Decreased, FDR<0.05 versus solvent control



| Symbol        | Synonym(s)                                                                                                                                                                                                                                                                                                                                                                                                                                                                                                                                                                                                                                 |
|---------------|--------------------------------------------------------------------------------------------------------------------------------------------------------------------------------------------------------------------------------------------------------------------------------------------------------------------------------------------------------------------------------------------------------------------------------------------------------------------------------------------------------------------------------------------------------------------------------------------------------------------------------------------|
| ACTIN         | CLEC9A Ligand, G-actin                                                                                                                                                                                                                                                                                                                                                                                                                                                                                                                                                                                                                     |
| AKT           | AKT1/2/3, B/Akt, PKB, RAC-PK                                                                                                                                                                                                                                                                                                                                                                                                                                                                                                                                                                                                               |
| Alphactinin   | ACTININ, Actinin alpha, Actinin $\alpha$ , ACTN, $\alpha$ -Actinin, $\alpha$ Actinin human                                                                                                                                                                                                                                                                                                                                                                                                                                                                                                                                                 |
| ARNT          | Arnt1, aryl hydrocarbon receptor nuclear translocator, bHLHe, bHLHe2, D3Ert557, D3Ert557e, DIOXIN receptor, Drnt, ESTM4, ESTM42, Hif1, HIF1B, HIF1BETA, HIF-1- $\beta$ , HIF beta, HIF $\beta$ , mKIAA4051, TANGO, W08714                                                                                                                                                                                                                                                                                                                                                                                                                  |
| BAD           | A1325008, Bad v1, Bad v2, BBC2, BCL2-associated agonist of cell death, BCL2L8                                                                                                                                                                                                                                                                                                                                                                                                                                                                                                                                                              |
| BCL-XL        | bBclxl, Bcl, BCL2L, BCL2-like 1, BCLX, Bcl-X beta, Bclx gamma, BCL-XL/S, Bcl-X $\beta$ , Bclx $\gamma$ , PPP1R52                                                                                                                                                                                                                                                                                                                                                                                                                                                                                                                           |
| BCL2          | AW986256, B cell leukaemia/lymphoma 2, B cell leukemia/lymphoma 2, Bcl-, Bcl2 alpha, BCL2 apoptosis regulator, BCL2, apoptosis regulator, Bcl2 $\alpha$ , C430015F12Rik, D630044D05RIK, D830018M01RIK, LOC100046608, ORF16, PPP1R50                                                                                                                                                                                                                                                                                                                                                                                                        |
| Ca2+          | 14127-61-8, Ca+2, calcium, calcium(2+), calcium cation, calcium citrate, calcium ion, calcium, ion (Ca2+), calcium ions, Citracal, tricalcium dicitrate                                                                                                                                                                                                                                                                                                                                                                                                                                                                                    |
| DAG           | DAG, diacylglycerides, diglyceride                                                                                                                                                                                                                                                                                                                                                                                                                                                                                                                                                                                                         |
| ELAVL1        | 2410055N02RIK, DKFZP667b083, ELAV1, ELAV (embryonic lethal, abnormal vision)-like 1 (Hu antigen R), ELAV like RNA binding protein 1, Hu, Hua, Hu antigen R, HUR, MeIG, RGD:731215, RNA binding protein HuR, W91709                                                                                                                                                                                                                                                                                                                                                                                                                         |
| ERK1/2        | MAPK p44/42, MAPK p44/p42, p42/44 mapk, P42/p44 erk, P42/p44 mapk, p42/p44 MAP KINASE                                                                                                                                                                                                                                                                                                                                                                                                                                                                                                                                                      |
| FKHR          | FOXO1/3A                                                                                                                                                                                                                                                                                                                                                                                                                                                                                                                                                                                                                                   |
| GRB2          | AA408164, ASH, Ash-psi, EGFRBP-GRB2, GRAB2, GRBS, growth factor receptor bound protein 2, MST084, MSTP084, NCKAP2                                                                                                                                                                                                                                                                                                                                                                                                                                                                                                                          |
| HIF1A         | AA959795, bHLHe7, bHLHe78, HIF-1, HIF1-ALPHA, HIF-1alpha (hydroxylated), HIF-1- $\alpha$ , HIF-1 $\alpha$ (hydroxylated), Hypoxia inducible factor 1 alpha subunit, hypoxia inducible factor 1, alpha subunit, hypoxia inducible factor 1 subunit alpha, hypoxia inducible factor 1 subunit $\alpha$ , Hypoxia inducible factor 1 $\alpha$ subunit, hypoxia inducible factor 1, $\alpha$ subunit, MO, MOP1, PASD8                                                                                                                                                                                                                          |
| IP3           | 108340-81-4, 1,4,5-InsP3, [(1R,2S,3R,4R,5S,6R)-2,3,5-trihydroxy-4,6-diphosphonooxycyclohexyl] dihydrogen phosphate, 85166-31-0, 88269-39-0, C6H15O15P3, D-myo-Inositol, 1,4,5-tris(dihydrogen phosphate), D-myo-inositol (1,4,5)-trisphosphate, D-myo-inositol 1,4,5-trisphosphate, inositol 1,4,5-trisphosphate, inositol 1,4,5-trisphosphate, Ins(1,4,5)P3, InsP3, IP3, myo-inositol 1,4,5-trisphosphate, phosphatidylinositol 1,4,5-triphosphate                                                                                                                                                                                        |
| KDR           | 6130401C07, CD309, Flk, FLK1, Kinase Insert Domain, kinase insert domain protein receptor, kinase insert domain receptor, Krd-1, Ly73, onv, VEGF, VEGFR, VEGFR-2                                                                                                                                                                                                                                                                                                                                                                                                                                                                           |
| MAP2K1/2      | MEK1/2, MKK1/2                                                                                                                                                                                                                                                                                                                                                                                                                                                                                                                                                                                                                             |
| NO            | 10102-43-9, Amidogen, oxo-, EDRF, gaseous nitric oxide, Genosyl, inhaled nitric oxide, INOmax, Mononitrogen monoxide, nitric oxide, nitric oxide gas, nitric oxide gas radical, Nitric oxide trimer, Nitrogen monooxide, nitrogen monoxide, nitrogen oxide (NO), nitrogen protoxide, Nitrosyl radical, NMO, NO                                                                                                                                                                                                                                                                                                                             |
| NOS3          | 2310065A03RIK, e, ec, ECNOS, eNOS, nitric oxide synthase 3, nitric oxide synthase 3, endothelial cell, nNOS, No                                                                                                                                                                                                                                                                                                                                                                                                                                                                                                                            |
| PI3K          | 1-phosphatidylinositol 3-kinase, 2.7.1.137, ATP:1-phosphatidyl-1D-myo-inositol 3-phosphotransferase, Phosphatidylinositol 3 kinase, phosphatidylinositol 3'-kinase, PI3-kinase, PtdIns 3 Kinase, type III phosphoinositide 3-kinase, type I phosphatidylinositol kinase, Vps34p                                                                                                                                                                                                                                                                                                                                                            |
| PIP2          | 1,2-diacyl-sn-glycero-3-phospho-(1'-myo-inositol-4',5'-bisphosphate), 1-O-(3-sn-phosphatidyl)-1D-myo-inositol 4,5-bis(dihydrogen phosphate), 1-phosphatidyl-1D-myo-inositol 4,5-bisphosphate, C11H19O19P3R2                                                                                                                                                                                                                                                                                                                                                                                                                                |
| PIP3          | 1-phosphatidyl-1D-myo-inositol 3,4,5-trisphosphate, phosphatidylinositol-3,4,5-trisphosphate, phosphoinositide (3,4,5) P3, PI(3,4,5)P3, Plns(3,4,5)P3, PIP3, PtdIns(3,4,5)P3                                                                                                                                                                                                                                                                                                                                                                                                                                                               |
| PKCalpha/beta | PKC (alpha, beta), PKCalpha/betall, PKC alphas/betall, PKC ( $\alpha$ , $\beta$ ), PKC $\alpha/\beta$ , PKC $\alpha/\beta$ II, PRKCA/B                                                                                                                                                                                                                                                                                                                                                                                                                                                                                                     |
| PLC-gamma     | Phospholipase C gamma, Phospholipase C $\gamma$ , PLCG, PLC $\gamma$                                                                                                                                                                                                                                                                                                                                                                                                                                                                                                                                                                       |
| PTK2          | FA, Fad, FADK, FADK 1, FAK, FAK1, FAK related non-kinase, FR, p125FAK, pp125FAK, PPP1R71, protein tyrosine kinase 2, PTK2 protein tyrosine kinase 2, TYROSINE KINASE 2                                                                                                                                                                                                                                                                                                                                                                                                                                                                     |
| PTK2B         | CADTK, CAKB, CAKbe, CAK beta, CAK $\beta$ , cell adhesion kinase $\beta$ , E430023O05RIK, FADK2, FAK2, PKB, protein tyrosine kinase 2 beta, protein tyrosine kinase 2 $\beta$ , PTK, PTK2 protein tyrosine kinase 2 beta, PTK2 protein tyrosine kinase 2 $\beta$ , PYK, PYK2, Raf, RAFTK                                                                                                                                                                                                                                                                                                                                                   |
| PXN           | AW108311, AW123232, FLJ23042, P, PAX, PAXILLIN                                                                                                                                                                                                                                                                                                                                                                                                                                                                                                                                                                                             |
| RAF1          | 6430402F14RIK, AA990557, BB129353, CMD1NN, c-R, Cra, CRAF, Cra1, D830050J10RIK, leukaemia ONCOGENE HOMOLOG1, LEUKEMIA ONCOGENE HOMOLOG1, NS5, Raf-1 proto-oncogene, serine/threonine kinase, v-, v-Raf, v-raf-Heukaemia viral oncogene 1, v-raf-Heukemia viral oncogene 1                                                                                                                                                                                                                                                                                                                                                                  |
| ROCK          | RhoA-Binding Kinase alpha/beta, RhoA-Binding Kinase $\alpha/\beta$ , Rho Kinase, ROK, ROK alpha/beta, ROK $\alpha/\beta$                                                                                                                                                                                                                                                                                                                                                                                                                                                                                                                   |
| SFN           | 14-3-3, 14-3-3 Sigma, 14-3-3 $\sigma$ , E, ER, HME1, Mme1, Stratifin, Ywh, YWHAS                                                                                                                                                                                                                                                                                                                                                                                                                                                                                                                                                           |
| SH2D2A        | F2771, L, LAD, R, Ribp, Rlk-binding, SCAP, SH2 domain containing 2A, TS, TSAD, VRAP                                                                                                                                                                                                                                                                                                                                                                                                                                                                                                                                                        |
| SHC1          | p52SHC, p6, p66, p66s, P66shc, Sh, SHC, Shc (46 kDa isoform), SHCA, SHC adaptor protein 1, Shc p66 isoform, src homology 2 domain-containing transforming protein C1                                                                                                                                                                                                                                                                                                                                                                                                                                                                       |
| SHP           | Ptpn6/11, SHP-1/2                                                                                                                                                                                                                                                                                                                                                                                                                                                                                                                                                                                                                          |
| SRC           | ASV, AW259666, BS27, c-SRC, p60-Src, PP60, pp60c, Pp60/c-Src, pp60c-src, Rous sarcoma oncogene, SRC1, SRC proto-oncogene, non-receptor tyrosine kinase, THC6, TVHUSC                                                                                                                                                                                                                                                                                                                                                                                                                                                                       |
| VCL           | 9430097D22, AA571387, A1462105, AW545629, CMD1W, CMH15, HEL114, MV, MVCL, Vcl predicted, Vinculin                                                                                                                                                                                                                                                                                                                                                                                                                                                                                                                                          |
| VEGFR         | VEGFR                                                                                                                                                                                                                                                                                                                                                                                                                                                                                                                                                                                                                                      |
| YWHAE         | 14-3-3E, 14-3-3 epsilon, 14-3-3 L, 14-3-3 $\epsilon$ , AU019196, HEL2, KCIP-1, LOC727845, MDCR, MDS, tyrosine 3-monooxygenase/tryptophan 5-monooxygenase activation protein epsilon, tyrosine 3-monooxygenase/tryptophan 5-monooxygenase activation protein, epsilon, tyrosine 3-monooxygenase/tryptophan 5-monooxygenase activation protein, epsilon polypeptide, tyrosine 3-monooxygenase/tryptophan 5-monooxygenase activation protein $\epsilon$ , tyrosine 3-monooxygenase/tryptophan 5-monooxygenase activation protein, $\epsilon$ , tyrosine 3-monooxygenase/tryptophan 5-monooxygenase activation protein, $\epsilon$ polypeptide |

Pathway Analysis Using IPA Software; canonical pathway

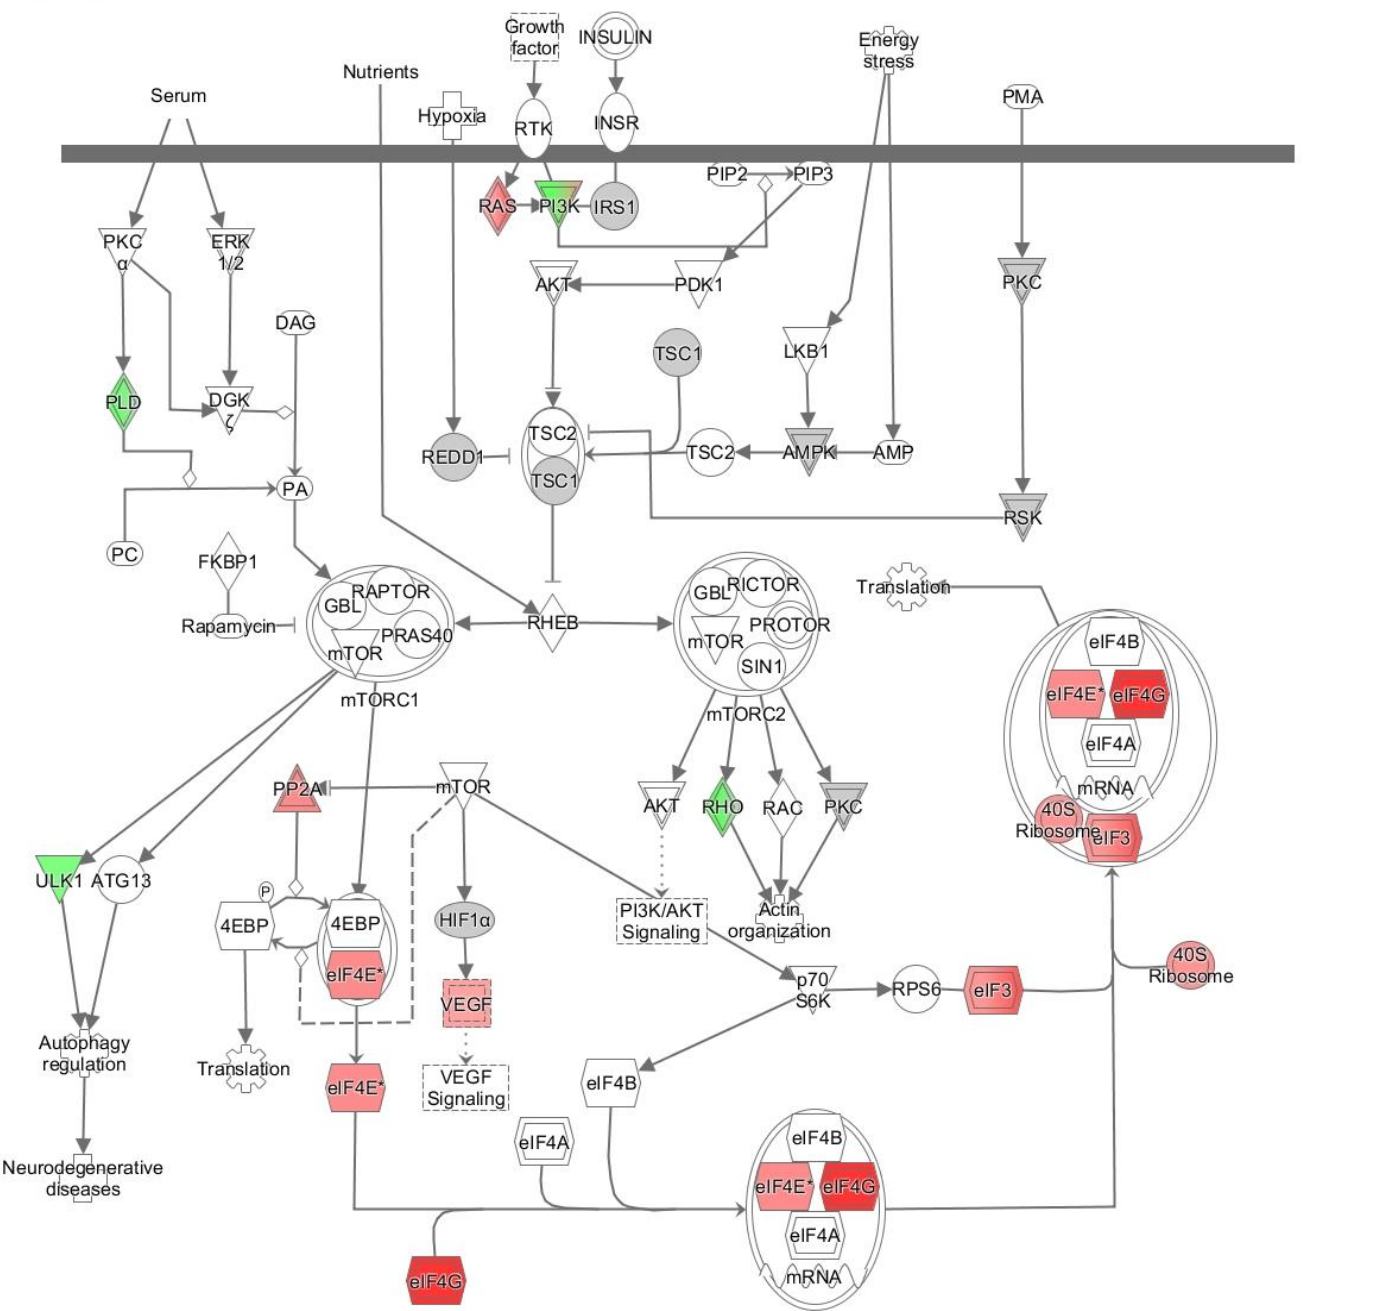

Figure S51. mTOR Signaling at 24 h

| Symbol               | Synonym(s)                                                                                                                                                                                                                                                                                                                                                                                                                                                                                                                                                                                                                                                                                                                                                                                                                                                                                                                                                                                                                                                                                                                                                                                        |
|----------------------|---------------------------------------------------------------------------------------------------------------------------------------------------------------------------------------------------------------------------------------------------------------------------------------------------------------------------------------------------------------------------------------------------------------------------------------------------------------------------------------------------------------------------------------------------------------------------------------------------------------------------------------------------------------------------------------------------------------------------------------------------------------------------------------------------------------------------------------------------------------------------------------------------------------------------------------------------------------------------------------------------------------------------------------------------------------------------------------------------------------------------------------------------------------------------------------------------|
| 4EBP-eIF4E           | eIF4E-eIF4EBP                                                                                                                                                                                                                                                                                                                                                                                                                                                                                                                                                                                                                                                                                                                                                                                                                                                                                                                                                                                                                                                                                                                                                                                     |
| AKT                  | AKT1/2/3, B/Akt, PKB, RAC-PK                                                                                                                                                                                                                                                                                                                                                                                                                                                                                                                                                                                                                                                                                                                                                                                                                                                                                                                                                                                                                                                                                                                                                                      |
| AKT1S1               | 1110012J22RIK, AI227026, AI430011, AKT1 substrate 1, AKT1 substrate 1 (proline-rich), Lo, Lobe, Lobel, PR, PRAS, PRAS40, Proline-rich AKT substrate                                                                                                                                                                                                                                                                                                                                                                                                                                                                                                                                                                                                                                                                                                                                                                                                                                                                                                                                                                                                                                               |
| AMP                  | 149022-20-8, [(2R,3S,4R,5R)-5-(6-aminopurin-9-yl)-3,4-dihydroxyoxolan-2-yl]methyl dihydrogen phosphate, 5'-adenylic acid, 5' AMP, 5'-AMP, 61-19-8, adenosine-5-monophosphate, adenosine-5-phosphate, adenosine monophosphate, C10H14N5O7P                                                                                                                                                                                                                                                                                                                                                                                                                                                                                                                                                                                                                                                                                                                                                                                                                                                                                                                                                         |
| AMPK                 | AMP-activated kinase, AMP KINASE, Amp-pk                                                                                                                                                                                                                                                                                                                                                                                                                                                                                                                                                                                                                                                                                                                                                                                                                                                                                                                                                                                                                                                                                                                                                          |
| ATG13                | 1110053A20RIK, autophagy related 13, D2Etd391, D2Etd391e, Harbi1, Harbi1l, KIAA0652, PARATARG8, RGD1310685                                                                                                                                                                                                                                                                                                                                                                                                                                                                                                                                                                                                                                                                                                                                                                                                                                                                                                                                                                                                                                                                                        |
| DAG                  | DAG, diacylglycerides, diglyceride                                                                                                                                                                                                                                                                                                                                                                                                                                                                                                                                                                                                                                                                                                                                                                                                                                                                                                                                                                                                                                                                                                                                                                |
| DDIT4                | 5830413E08RIK, AA415483, Dig, Dig2, DKFZP564O2071, DNA-damage-inducible transcript 4, FLJ20500, REDD, REDD-1, Rtp8, Rtp801                                                                                                                                                                                                                                                                                                                                                                                                                                                                                                                                                                                                                                                                                                                                                                                                                                                                                                                                                                                                                                                                        |
| DGKZ                 | 80-kDa Dg Kinase, DAGK5, DAGK6, Dgk4, DGK-ZETA, DGK-ζ, Diacylglycerol kinase, diacylglycerol kinase zeta, diacylglycerol kinase ζ, E130307B02RIK, F730209L11RIK, hDGKzeta, KDGZ, mDGK[z]                                                                                                                                                                                                                                                                                                                                                                                                                                                                                                                                                                                                                                                                                                                                                                                                                                                                                                                                                                                                          |
| Eif-4a               | Eukaryotic translation initiation factor 4a, Homologous to SP P44586 ATP-dependent RNA helicase DEAD                                                                                                                                                                                                                                                                                                                                                                                                                                                                                                                                                                                                                                                                                                                                                                                                                                                                                                                                                                                                                                                                                              |
| EIF4B                | 2310046H11RIK, AL024095, C85189, Eif4a2, eIF4B, eukaryotic translation initiation factor 4B, Initiation Factor M3, PRO1843                                                                                                                                                                                                                                                                                                                                                                                                                                                                                                                                                                                                                                                                                                                                                                                                                                                                                                                                                                                                                                                                        |
| EIF4E                | AUTS19, CAP-binding, CBP, EG668879, eIF-4, EIF4E1, EIF4EL1, Eif4e-ps, EIF4F, eukaryotic translation initiation factor 4E, If4, If4e                                                                                                                                                                                                                                                                                                                                                                                                                                                                                                                                                                                                                                                                                                                                                                                                                                                                                                                                                                                                                                                               |
| EIF4EBP1             | 4e-bp, 4E-BP1, AA959816, BP-1, Eukaryotic translation initiation factor 4e binding protein 1, PH, PHAS-I                                                                                                                                                                                                                                                                                                                                                                                                                                                                                                                                                                                                                                                                                                                                                                                                                                                                                                                                                                                                                                                                                          |
| eIF4G                | eIF4gamma, eIF4y                                                                                                                                                                                                                                                                                                                                                                                                                                                                                                                                                                                                                                                                                                                                                                                                                                                                                                                                                                                                                                                                                                                                                                                  |
| ERK1/2               | MAPK p44/42, MAPK p44/p42, p42/44 mapk, P42/p44 erk, P42/p44 mapk, p42/p44 MAP KINASE                                                                                                                                                                                                                                                                                                                                                                                                                                                                                                                                                                                                                                                                                                                                                                                                                                                                                                                                                                                                                                                                                                             |
| FKBP1A               | FK506 binding protein 1a, Fkb, Fkbp, FKBP1, FKBP-12, Fkbp2, FKBP prolyl isomerase 1A, FPK1, macrophilin-12, PKC12, PKC12, PPIASE                                                                                                                                                                                                                                                                                                                                                                                                                                                                                                                                                                                                                                                                                                                                                                                                                                                                                                                                                                                                                                                                  |
| HIF1A                | AA959795, bHLHe7r, bHLHe78, HIF-1, HIF1-ALPHA, HIF-1alpha (hydroxylated), HIF-1-α, HIF-1α (hydroxylated), Hypoxia inducible factor 1 alpha subunit, hypoxia inducible factor 1, alpha subunit, hypoxia inducible factor 1 subunit alpha, hypoxia inducible factor 1 subunit α, Hypoxia inducible factor 1 α subunit, hypoxia inducible factor 1, α subunit, MO, MOP1, PASD8                                                                                                                                                                                                                                                                                                                                                                                                                                                                                                                                                                                                                                                                                                                                                                                                                       |
| INSR                 | 4932439J01RIK, alpha subunit INSULIN receptor, CD220, D630014A15RIK, HIF5, I, insulin receptor, INSULIN receptor B, Insulin receptor beta, INSULIN receptor KINASE, Insulin receptor β, INSULIN RPTK, IR, IR alpha, IR-B, IRK, IR α, α subunit INSULIN receptor                                                                                                                                                                                                                                                                                                                                                                                                                                                                                                                                                                                                                                                                                                                                                                                                                                                                                                                                   |
| INSULIN              | Ins, Ins1/2, proinsulin                                                                                                                                                                                                                                                                                                                                                                                                                                                                                                                                                                                                                                                                                                                                                                                                                                                                                                                                                                                                                                                                                                                                                                           |
| IRS1                 | ENSMUSG00000022591, G972, G972R, HIRS-1, insulin receptor substrate 1, IR, IRS1IRM                                                                                                                                                                                                                                                                                                                                                                                                                                                                                                                                                                                                                                                                                                                                                                                                                                                                                                                                                                                                                                                                                                                |
| MAPKAP1              | AI591529, D230039K05RIK, JC310, MAPK associated protein 1, MIP1, mitogen-activated protein kinase associated protein 1, mSIN1, S, SIN1                                                                                                                                                                                                                                                                                                                                                                                                                                                                                                                                                                                                                                                                                                                                                                                                                                                                                                                                                                                                                                                            |
| MLST8                | 0610033N12RIK, AA409454, AI505104, AI851821, Gb, GbetaL, GBL, GβL, LST8, mLS, MTOR associated protein, LST8 homolog, MTOR associated protein, LST8 homolog (S. cerevisiae), POP3, WAT1                                                                                                                                                                                                                                                                                                                                                                                                                                                                                                                                                                                                                                                                                                                                                                                                                                                                                                                                                                                                            |
| MTOR                 | 2610315D21RIK, AI327068, fl, Flat, Fr, FRAP, FRAP1, FRAP2, FRB, mechanistic target of rapamycin kinase, RA, RAF, RAFT1, RAPT1, RRAFT1, SKS                                                                                                                                                                                                                                                                                                                                                                                                                                                                                                                                                                                                                                                                                                                                                                                                                                                                                                                                                                                                                                                        |
| PA                   | 1,2-diacyl-sn-glycerol-3-phosphate, diacylglycerophosphates, PA, phospholipids alcohol, PtdOH                                                                                                                                                                                                                                                                                                                                                                                                                                                                                                                                                                                                                                                                                                                                                                                                                                                                                                                                                                                                                                                                                                     |
| PC                   | 3-sn-phosphatidylcholine, C10H18NO8PR2, choline glycerophospholipid, diacylglycerophosphocholines, lecithin, lecithins, lecithin, soy, lecithin, soybean, LT-02, PC, phosphatidylcholine, soya phosphatidyl choline, soybean phospholipids, soy lecithin                                                                                                                                                                                                                                                                                                                                                                                                                                                                                                                                                                                                                                                                                                                                                                                                                                                                                                                                          |
| PDPK1                | 3-PDK, 3-phosphoinositide dependent protein kinase-1, Pdk, PDK1, PDPK2, PDPK2P, PRO0461                                                                                                                                                                                                                                                                                                                                                                                                                                                                                                                                                                                                                                                                                                                                                                                                                                                                                                                                                                                                                                                                                                           |
| PI3K                 | 1-phosphatidylinositol 3-kinase, 2.7.1.137, ATP:1-phosphatidyl-1D-myo-inositol 3-phosphotransferase, Phosphatidylinositol 3 kinase, phosphatidylinositol 3-kinase, PI3-kinase, Ptdlns 3 Kinase, type III phosphoinositide 3-kinase, type I phosphatidylinositol kinase, Vps34p                                                                                                                                                                                                                                                                                                                                                                                                                                                                                                                                                                                                                                                                                                                                                                                                                                                                                                                    |
| PIP2                 | 1,2-diacyl-sn-glycerol-3-phospho-(1'-myo-inositol-4,5-bisphosphate), 1-O-(3-sn-phosphatidyl)-1D-myo-inositol 4,5-bis(dihydrogen phosphate), 1-phosphatidyl-1D-myo-inositol 4,5-bisphosphate, C11H19O19P3R2                                                                                                                                                                                                                                                                                                                                                                                                                                                                                                                                                                                                                                                                                                                                                                                                                                                                                                                                                                                        |
| PIP3                 | 1-phosphatidyl-1D-myo-inositol 3,4,5-trisphosphate, phosphatidylinositol 3,4,5-trisphosphate, phosphoinositide (3,4,5) P3, PI(3,4,5)P3, PIns(3,4,5)P3, PIP3, Ptdlns(3,4,5)P3                                                                                                                                                                                                                                                                                                                                                                                                                                                                                                                                                                                                                                                                                                                                                                                                                                                                                                                                                                                                                      |
| PKC                  | Cnpgc, PKC, Pkc(s), Protein Kinase C                                                                                                                                                                                                                                                                                                                                                                                                                                                                                                                                                                                                                                                                                                                                                                                                                                                                                                                                                                                                                                                                                                                                                              |
| PLD                  | 3.1.4.4, choline phosphatase, lecithinase D, lipophosphodiesterase II, phosphatidylcholine phosphatidohydrolase, PHOSPHOLIPASE D                                                                                                                                                                                                                                                                                                                                                                                                                                                                                                                                                                                                                                                                                                                                                                                                                                                                                                                                                                                                                                                                  |
| PMA                  | 12-O-tetradecanoylphorbol-13-acetate, 16561-29-8, [(1S,2S,6R,10S,11R,13S,14R,15R)-13-acetyloxy-1,6-dihydroxy-8-(hydroxymethyl)-4,12,12,15-tetramethyl-5-oxo-14-tetracyclo[8.5.0.0.2,6.0.11,13]pentadeca-3,8-dienyl] tetradecanoate, 4beta-PMA, beta-PMA, C36H56O8, myristic acid, 9-ester with 1,1a-alpha,1b-beta,4,4a,7a-alpha,7b,8,9,9a-decahydro-4a-beta,7b-alpha,9-beta,9a-alpha-tetrahydroxy-3-(hydroxymethyl)-1,1,6,8-alpha-tetramethyl-5H-cyclopropa(3,4)benz(1,2-e)azulen-5-one, 9a-acetate, myristic acid, 9-ester with 1,1a-α,1b-β,4,4a,7a-α,7b,8,9,9a-decahydro-4a-β,7b-α,9-β,9a-α-tetrahydroxy-3-(hydroxymethyl)-1,1,6,8-α-tetramethyl-5H-cyclopropa(3,4)benz(1,2-e)azulen-5-one, 9a-acetate, phorbol 12-myristate 13-acetate, phorbol myristate acetate, PMA, tetradecanoic acid, 9a-(acetyloxy)-1a,1b,4,4a,5,7a,7b,8,9,9a-decahydro-4a,7b-dihydroxy-3-(hydroxymethyl)-1,1,6,8-tetramethyl-5-oxo-1H-cyclopropa(3,4)benz(1,2-e)azulen-9-yl ester, (1aR-(1aalpha,1bbeta,4abeta,7aalpha,7balpha,8alpha,9beta,9aalpha))-, tetradecanoyl-phorbol-13-acetate, TPA, β-12-O-tetradecanoylphorbol-13-acetate, β-phorbol 12-myristate 13-acetate, β-phorbol-12 β-myristate-13 α-acetate, β-PMA |
| PP2A                 | protein PHOSPHATASE 2A, Protein Phosphatase Type2a                                                                                                                                                                                                                                                                                                                                                                                                                                                                                                                                                                                                                                                                                                                                                                                                                                                                                                                                                                                                                                                                                                                                                |
| PRKCA                | AAG6, AI875142, LOC146784, Pk, PKCA, PKC-alpha, PKC+/-, PKC-α, PKRCA, PRKACA, protein kinase C alpha, protein kinase C, alpha, protein kinase C α, protein kinase C, α, α-protein kinase C                                                                                                                                                                                                                                                                                                                                                                                                                                                                                                                                                                                                                                                                                                                                                                                                                                                                                                                                                                                                        |
| RAC1                 | AL023026, D5Erd559, D5Erd559e, MIG5, MRD48, p21-Rac1, p21-RAC, Rac, Rac family small GTPase 1, TC-25                                                                                                                                                                                                                                                                                                                                                                                                                                                                                                                                                                                                                                                                                                                                                                                                                                                                                                                                                                                                                                                                                              |
| Rapamycin            | 1402453-65-9, (1R,9S,12S,15R,16E,18R,19R,21R,23S,24E,26E,28E,30S,35R)-1,18-dihydroxy-12-[(2R)-1-[(1S,3R,4R)-4-hydroxy-3-methoxycyclohexyl]propan-2-yl]-19,30-dimethoxy-15,17,21,23,29,35-hexamethyl-11,36-dioxo-4-azatricyclo[30.3.1.04,9]hexatriaconta-16,24,26,28-tetraene-2,3,10,14,20-pentone, (3S,6R,7E,9R,10R,12R,14S,15E,17E,19E,21S,23S,26R,27R,34aS)-9,10,12,13,14,21,22,23,24,25,26,27,32,33,34,34a-Hexadecahydro-9,27-dihydroxy-3-[(1R)-2-[(1S,3R,4R)-4-hydroxy-3-methoxycyclohexyl]-1-methylethyl]-10,21-dimethoxy-6,8,12,14,20,26-hexamethyl-23,27-epoxy-3H-pyrido[2,1-c][1,4]oxaazacyclohentacontine-1,5,11,28,29(4H,6H,31H)-pentone, 53123-88-9, ABI-009, AY 22-989, C51H79NO13, erapa, I-2190A, nab-rapamycin, nanoparticle albumin-bound rapamycin, NSC 226080, Rapamune, Rapamycin, SEL-110, SILA 9268A, SVP-rapamycin, WY-090217                                                                                                                                                                                                                                                                                                                                               |
| RHEB                 | Ras homolog enriched in brain, Ras homolog, mTORC1 binding, RHEB1, RHEB2                                                                                                                                                                                                                                                                                                                                                                                                                                                                                                                                                                                                                                                                                                                                                                                                                                                                                                                                                                                                                                                                                                                          |
| RHO                  | GTPase Rho, Rho, Rho Family, RHO-GTPASE, Rho-like Gtpase                                                                                                                                                                                                                                                                                                                                                                                                                                                                                                                                                                                                                                                                                                                                                                                                                                                                                                                                                                                                                                                                                                                                          |
| Ribosomal40s subunit | 40s, 40S ribosomal subunit, 40S RIBOSOME                                                                                                                                                                                                                                                                                                                                                                                                                                                                                                                                                                                                                                                                                                                                                                                                                                                                                                                                                                                                                                                                                                                                                          |
| RICTOR               | 4921505C17RIK, 6030405M08RIK, AVO3, AW492497, D530039E11RIK, hAVO3, KIAA1999, Mtorc2, PIA, RPTOR independent companion of MTOR complex 2, RPTOR independent companion of MTOR, complex 2                                                                                                                                                                                                                                                                                                                                                                                                                                                                                                                                                                                                                                                                                                                                                                                                                                                                                                                                                                                                          |
| RPS6                 | 40S ribosomal protein S6-like, LOC100911372, pp33, Q9BZU1, RIBOSOMAL protein S6, S, S6, S6R, S6RP                                                                                                                                                                                                                                                                                                                                                                                                                                                                                                                                                                                                                                                                                                                                                                                                                                                                                                                                                                                                                                                                                                 |
| RPS6KB1              | 2610318I15RIK, 4732464A07RIK, AA959758, AI256796, AI314060, P70, p70/85s, p70/85s6k, p70-alpha, p70s, p70S6, p70s6k, P70S6K1, p70 S6K-alpha, p70S6 kinase, p70 S6K-α, p70(S6K)-α, p70-α, PS6K, ribosomal protein S6 kinase B1, ribosomal protein S6 kinase, polypeptide 1, S6K, S6K1, S6K-beta-1, S6K-β-1, STK14A                                                                                                                                                                                                                                                                                                                                                                                                                                                                                                                                                                                                                                                                                                                                                                                                                                                                                 |
| RPTOR                | 4932417H02RIK, KOG1, Mip1, mKIAA1303, r, Rap, RAPTOR, regulatory associated protein of MTOR complex 1, regulatory associated protein of MTOR, complex 1, RGD1311784                                                                                                                                                                                                                                                                                                                                                                                                                                                                                                                                                                                                                                                                                                                                                                                                                                                                                                                                                                                                                               |
| RSK                  | p90RSK                                                                                                                                                                                                                                                                                                                                                                                                                                                                                                                                                                                                                                                                                                                                                                                                                                                                                                                                                                                                                                                                                                                                                                                            |
| STK11                | AA408040, hLKB1, Lkb, LKB1, LKB1-L, LKB1(S), Pa, Par-4, PJS, R75140, serine/threonine kinase 11, Stk11 isoform 2, Stk11 short isoform                                                                                                                                                                                                                                                                                                                                                                                                                                                                                                                                                                                                                                                                                                                                                                                                                                                                                                                                                                                                                                                             |
| TSC1                 | ham, Hamartin, LAM, TSC, TSC complex subunit 1                                                                                                                                                                                                                                                                                                                                                                                                                                                                                                                                                                                                                                                                                                                                                                                                                                                                                                                                                                                                                                                                                                                                                    |
| Tsc1-Tsc2            | TSC, TSC1/2                                                                                                                                                                                                                                                                                                                                                                                                                                                                                                                                                                                                                                                                                                                                                                                                                                                                                                                                                                                                                                                                                                                                                                                       |
| TSC2                 | LAM, Na, Nafid, PPP1R160, Rc, Tcs2, TSC4, TSC complex subunit 2, tube, TUBERIN                                                                                                                                                                                                                                                                                                                                                                                                                                                                                                                                                                                                                                                                                                                                                                                                                                                                                                                                                                                                                                                                                                                    |
| ULK1                 | ATG1, ATG1A, AU041434, hATG1, mKIAA0722, ULK, Ulk1 mapped, UNC51, Unc51., Unc51.1, unc-51 like autophagy activating kinase 1, unc-51 like kinase 1                                                                                                                                                                                                                                                                                                                                                                                                                                                                                                                                                                                                                                                                                                                                                                                                                                                                                                                                                                                                                                                |

Pathway Analysis Using IPA Software; canonical pathway

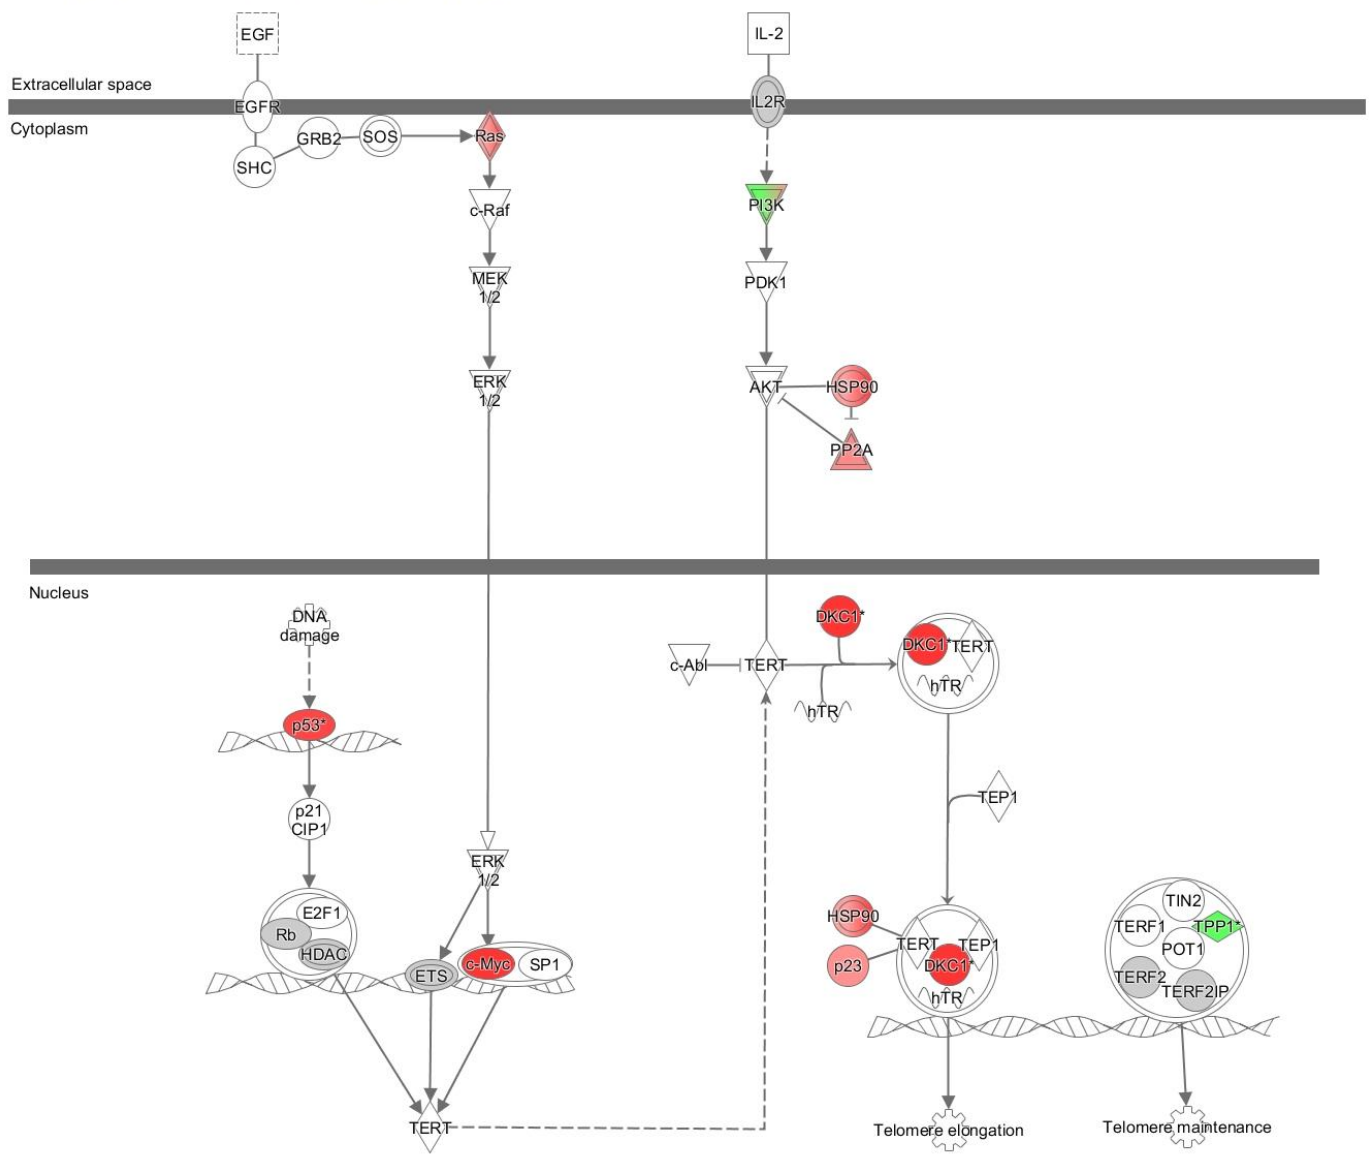

Figure S52. Telomerase Signaling at 24 h

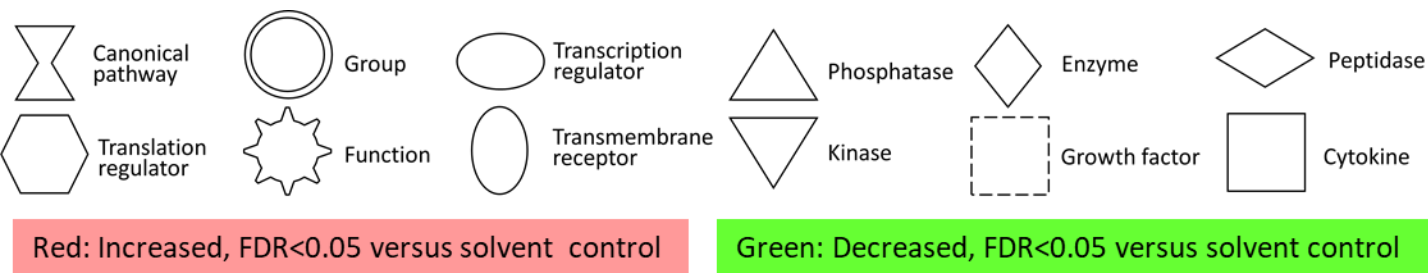

| Symbol   | Synonym(s)                                                                                                                                                                                                                                                                       |
|----------|----------------------------------------------------------------------------------------------------------------------------------------------------------------------------------------------------------------------------------------------------------------------------------|
| ABL1     | ABL, ABL proto-oncogene 1, non-receptor tyrosine kinase, A1325092, BCR-ABL, c-A, c-ABL, CABL1, c-abl oncogene 1, non-receptor tyrosine kinase, CHDSKM, E430008G22Rik, JTK7, LOC100909750, p145Abl, p150, tyrosine-protein kinase ABL1-like, v-abl                                |
| AKT      | AKT1/2/3, B/Akt, PKB, RAC-PK                                                                                                                                                                                                                                                     |
| CDKN1A   | CAP, CAP20, CDK, CDKI, Cdkn, CDKN1, CDKN1A, Cl, CIP1, cyclin-dependent kinase inhibitor 1A, cyclin-dependent kinase inhibitor 1A (P21), mda, MDA-6, P2, P21, p21C, p21Cip, p21CIP1, p21W, p21WAF, p21Waf1, Pz1 Cyclin-Dependent Kinase Inhibitor, SD, SDI1, UV96, Waf, WAF1      |
| DKC1     | BC068171, CBF5, DKC, DKCX, dyskeratosis congenita 1, dyskerin, dyskerin pseudouridine synthase 1, NAP57, NOLA4, Weakly similar to tyrosine-prtein kinase jak3, XAP101                                                                                                            |
| E2F1     | E2f, E2F transcription factor 1, mKIAA4009, RBAP1, RBBP3, RBP3, Tg(Wnt1-cre)2Sor                                                                                                                                                                                                 |
| EGF      | A1790464, EGF-1, epidermal growth factor, HOMG4, URG                                                                                                                                                                                                                             |
| EGFR     | 9030024J15RIK, A1552599, C-ERBB, EGFR1, EGF receptor, EGFR VIII, EGF-TK, epidermal growth factor receptor, Erb, ERBB, ERBB1, Err, Errb1, ERRP, HER1, HER1 (EGFR), MENA, NISBD2, PIG61, Wa, wa-2, Wa5                                                                             |
| ERK1/2   | MAPK p44/42, MAPK p44/p42, p42/44 mapk, P42/p44 erk, P42/p44 mapk, p42/p44 MAP KINASE                                                                                                                                                                                            |
| GRB2     | AA408164, ASH, Ash-psi, EGFRBP-GRB2, GRAB2, GRBS, growth factor receptor bound protein 2, MST084, MSTP084, NCKAP2                                                                                                                                                                |
| HDAC     | Histone Deacetylase, Histone deacetyltransferase                                                                                                                                                                                                                                 |
| HSP90    | HSC90, Hsp84                                                                                                                                                                                                                                                                     |
| IL2      | IL, interleukin 2, lymphokine, TCGF                                                                                                                                                                                                                                              |
| IL2R     | IL2 Receptor                                                                                                                                                                                                                                                                     |
| MAP2K1/2 | MEK1/2, MKK1/2                                                                                                                                                                                                                                                                   |
| MYC      | AU016757, bHLHe3, bHLHe39, CMYC, C-MYC-P64, mMyc, MRTL, Myc2, MYCC, MYC proto-oncogene, bHLH transcription factor, myelocytomatosis oncogene, N, Niard, Nird, RNCMYC                                                                                                             |
| PDPK1    | 3'-PDK, 3-phosphoinositide dependent protein kinase-1, Pdk, PDK1, PDPK2, PDPK2P, PRO0461                                                                                                                                                                                         |
| PI3K     | 1-phosphatidylinositol 3-kinase, 2.7.1.137, ATP:1-phosphatidyl-l-D-myo-inositol 3-phosphotransferase, Phosphatidylinositol 3 kinase, phosphatidylinositol 3'-kinase, PI3-kinase, Ptdlns 3 Kinase, type III phosphoinositide 3-kinase, type I phosphatidylinositol kinase, Vps34p |
| POT1     | 1500031H18Rik, A1851169, CMM10, GLM9, HPOT1, Po, Pot1a, protection of telomeres 1, protection of telomeres 1A                                                                                                                                                                    |
| PP2A     | protein PHOSPHATASE 2A, Protein Phosphatase Type2a                                                                                                                                                                                                                               |
| PTGES3   | 5730442A20Rik, cPG, cPGES, Gm9769, p23, p23 COCHAPERONE, p23 PR RELATED, PGES3, prostaglandin E synthase 3, prostaglandin E synthase 3, pseudogene, Ptg, Ptges, Ptges3-ps, RGD1561913, sid31, sid3177, Teb, TEBP, Telomerase Binding Protein p23, Zhf6                           |
| RAF1     | 6430402F14Rik, AA990557, BB129353, CMD1NN, c-R, Cra, CRAF, Craf1, D830050J10Rik, leukaemia ONCOGENE HOMOLOG1, LEUKEMIA ONCOGENE HOMOLOG1, NS5, Raf-1 proto-oncogene, serine/threonine kinase, v-, v-Raf, v-raf-leukaemia viral oncogene 1, v-raf-leukemia viral oncogene 1       |
| RB1      | OSRC, p, p105, p105-Rb, p110 RB, p110-RB1, pp105, pp110, PPP1R130, pRb, R, RB, RB-ASSOCIATED, RB transcriptional corepressor 1, Retinoblastome tumor-suppression protein rb                                                                                                      |
| SHC1     | p52SHC, p6, p66, p66s, P66shc, Sh, SHC, Shc (46 kDa isoform), SHCA, SHC adaptor protein 1, Shc p66 isoform, src homology 2 domain-containing transforming protein C1                                                                                                             |
| SP1      | 1110003E12RIK, AA450830, A1845540, Sp1-1, Sp1 transcription factor, Sp1 (trans spliced isoform), Trans-acting transcription factor 1                                                                                                                                             |
| TEP1     | p240, telomerase associated protein 1, TLP1, Tp, TP1, TROVE1, VAULT2                                                                                                                                                                                                             |
| TERF1    | hTRF1-AS, P, PIN2, telomeric repeat binding factor 1, Trbf, TRBF1, TRF, TRF1, t-TRF1                                                                                                                                                                                             |
| TERF2    | telomeric repeat binding factor 2, TRBF2, TRF, TRF2                                                                                                                                                                                                                              |
| TERF2IP  | DRIP5, R, RAP1, telomeric repeat binding factor 2, interacting protein, TERF2 interacting protein                                                                                                                                                                                |
| TERT     | CMM9, DKCA2, DKCB4, EST2, hEST2, HTERT, hTERT, PFBMFT1, T, TCS1, TELOMERASE, Telomerase Catalytic Subunit, Telomerase Reverse Transcriptase, TP2, TR, TRT                                                                                                                        |
| TINF2    | AW552114, D14Wsu146, D14Wsu146e, DKCA3, TERF1 interacting nuclear factor 2, Terf1 (TRF1)-interacting nuclear factor 2, Ti, TIN2                                                                                                                                                  |
| TP53     | bbl, BCC7, bfy, bhy, BMFS5, LFS1, p4, p44, p5, P53, P53 cellular tumour antigen, p53 tumor suppressor, transformation related protein 53, TRP53, tumor protein p53, tumour protein p53                                                                                           |
| TPP1     | Cl, CLN2, GIG1, LPIC, SCAR7, TPP-I, tripeptidyl peptidase 1, Tripeptidyl peptidase i                                                                                                                                                                                             |

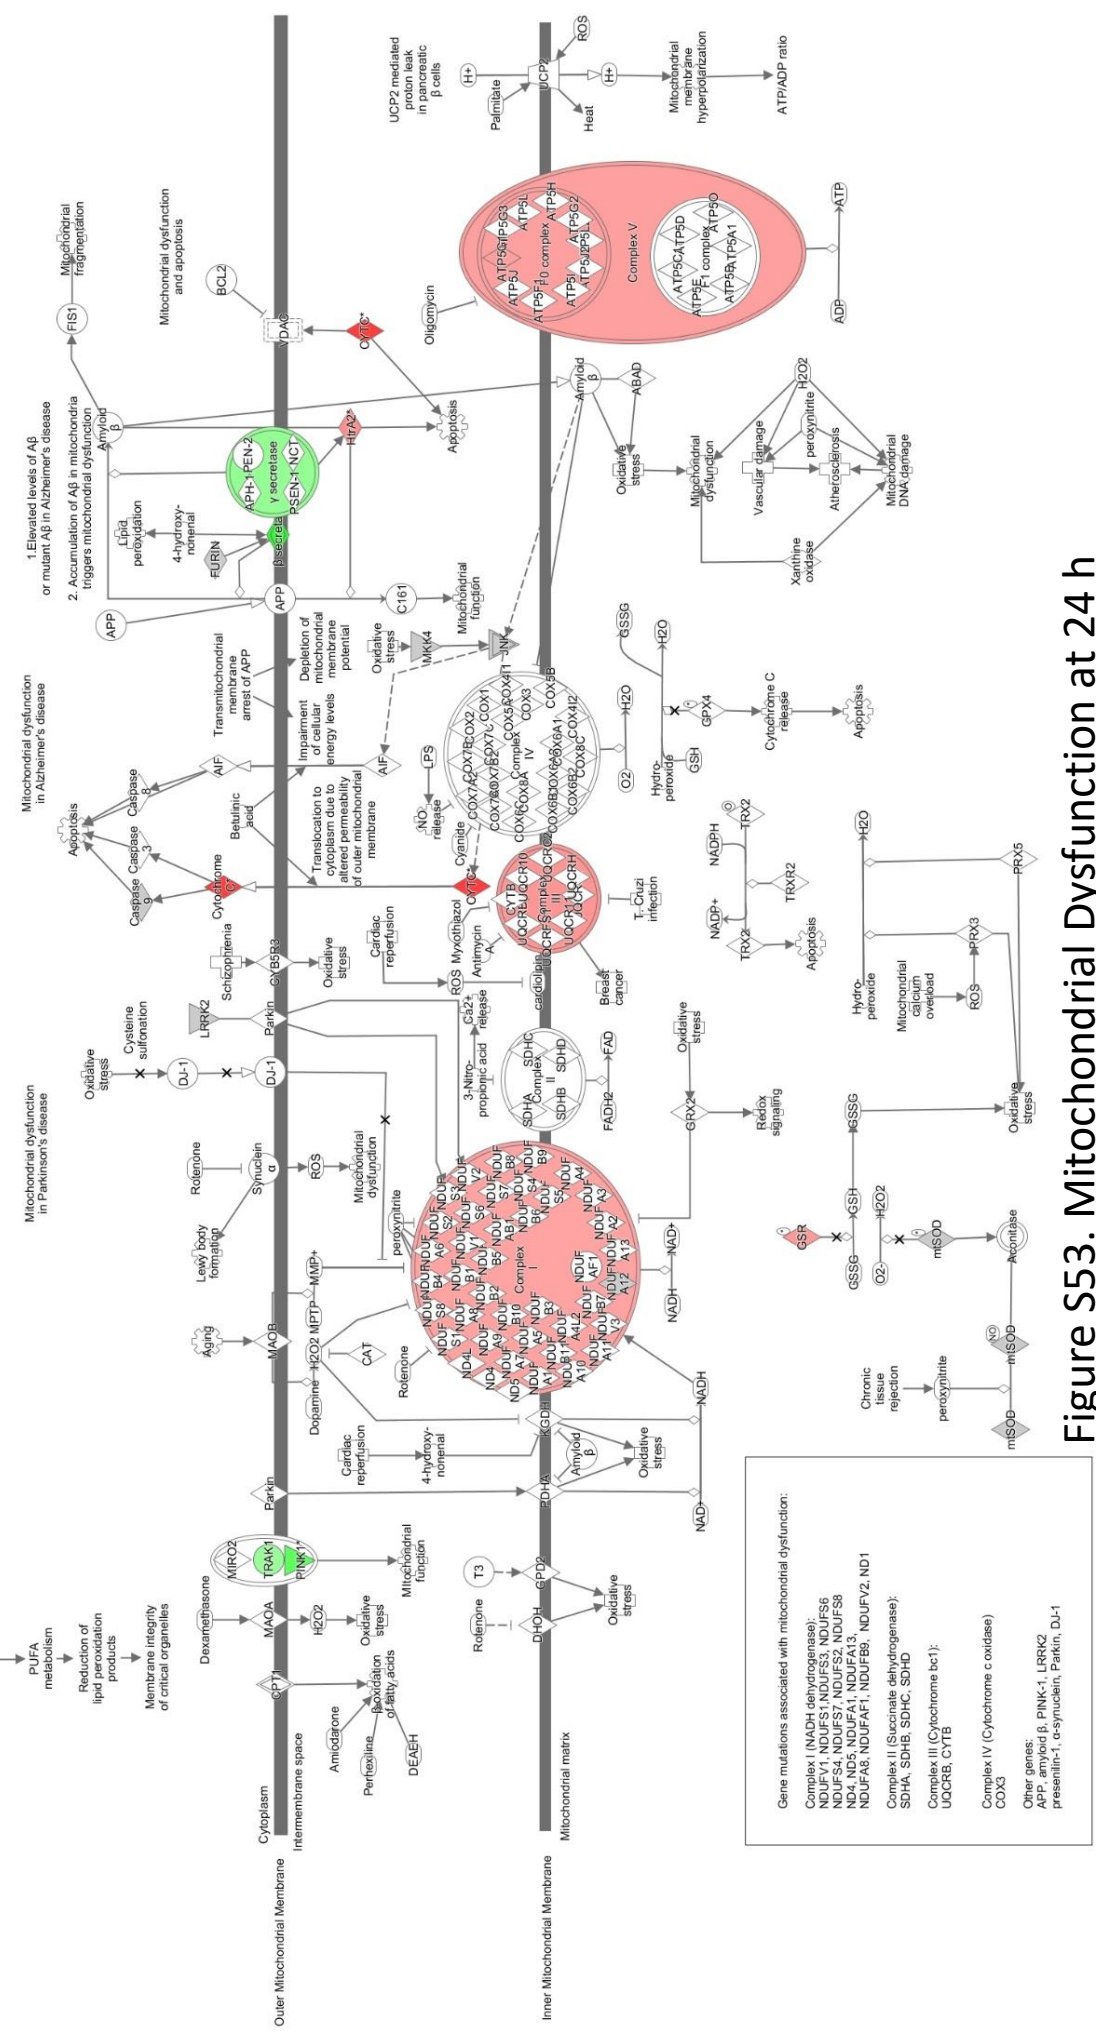

Figure S53. Mitochondrial Dysfunction at 24 h

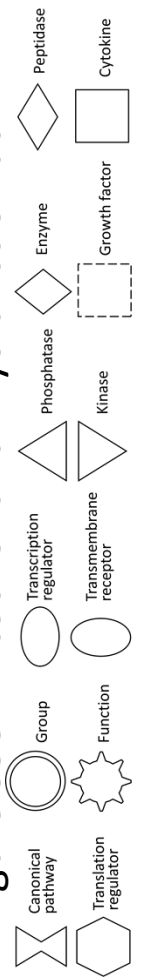

Red: Increased, FDR<0.05 versus control

Green: Decreased, FDR<0.05 versus control

| Symbol                 | Synonym(s)                                                                                                                                                                                                                                                                                                                                                                                                                                                                                                                                                                                                                                                                                                                                                                                                                                                                                                                                                                                                                                                              |
|------------------------|-------------------------------------------------------------------------------------------------------------------------------------------------------------------------------------------------------------------------------------------------------------------------------------------------------------------------------------------------------------------------------------------------------------------------------------------------------------------------------------------------------------------------------------------------------------------------------------------------------------------------------------------------------------------------------------------------------------------------------------------------------------------------------------------------------------------------------------------------------------------------------------------------------------------------------------------------------------------------------------------------------------------------------------------------------------------------|
| 3-Nitro-propionic acid | 3-nitropropanoic acid, 3-nitropropionate, 3-NP, 3-NP acid, 504-88-1, beta-nitropropanoate, beta-nitropropionic acid, BNP, C3H5NO4, propanoic acid, 3-nitro-, propanoic acid, 3-nitro- (9CI), β-nitropropanoate, β-nitropropionic acid                                                                                                                                                                                                                                                                                                                                                                                                                                                                                                                                                                                                                                                                                                                                                                                                                                   |
| 4-hydroxy-nonenal      | 29343-52-0, 2-Nonenal, 4-hydroxy-, 4-HNE, 4-hydroxy-2,3-nonena, 4-hydroxy-2,3-nonenal, 4-hydroxy-2-nonenal, 4-hydroxynon-2-enal, 75899-68-2, C9H16O2                                                                                                                                                                                                                                                                                                                                                                                                                                                                                                                                                                                                                                                                                                                                                                                                                                                                                                                    |
| Aconitase              | 4.2.1.3, aconitate hydratase, cis-aconitase, citrate(isocitrate) hydro-lyase                                                                                                                                                                                                                                                                                                                                                                                                                                                                                                                                                                                                                                                                                                                                                                                                                                                                                                                                                                                            |
| ADP                    | 20398-34-9, [(2R,3S,4R,5R)-5-(6-aminopurin-9-yl)-3,4-dihydroxyoxolan-2-yl]methyl phosphono hydrogen phosphate, 58-64-0, 9-beta-D-arabinofuranosyladenine 5'-diphosphate, 9-β-D-arabinofuranosyladenine 5'-diphosphate, adenosine 5'-(trihydrogen diphosphate), adenosine diphosphate, C10H15N5O10P2                                                                                                                                                                                                                                                                                                                                                                                                                                                                                                                                                                                                                                                                                                                                                                     |
| AIFM1                  | A, AIF, apoptosis inducing factor mitochondria associated 1, apoptosis inducing factor, mitochondria associated 1, apoptosis-inducing factor, mitochondrion-associated 1, AUNX1, CMT2D, CMTX4, COWCK, COXPD6, DFNX5, Hq, NADMR, NAMSD, PdcD, PDCD8, SEMDHL                                                                                                                                                                                                                                                                                                                                                                                                                                                                                                                                                                                                                                                                                                                                                                                                              |
| Amiodarone             | 1951-25-3, 19774-82-4, (2-butyl-1-benzofuran-3-yl)-[4-[2-(diethylamino)ethoxy]-3,5-diiodophenyl]methanone, 2-butyl-3-benzofuryl 4-(2-(diethylamino)ethoxy)-3,5-diiodophenyl ketone hydrochloride, AMD, Aminodarone, Amio-Aqueous IV, Amiodarex, amiodarone HCl, amiodarone hydrochloride, Amiodarons, Amiohexal, Amiorone, Aratac, Arycor, C25H29I2NO3, Cardarone, Cordarone, Cordarone Intravenous, Cordarone I.V., Labaz, Nexterone, Pacerone, prms-Amiodarone, Rythmarone                                                                                                                                                                                                                                                                                                                                                                                                                                                                                                                                                                                            |
| Antimycin A            | 1397-94-0, ALA, AMA, anthimycin A, antimycin, antimycin A                                                                                                                                                                                                                                                                                                                                                                                                                                                                                                                                                                                                                                                                                                                                                                                                                                                                                                                                                                                                               |
| APP                    | A, AAA, Abe, Abetapp, ABPP, AD1, Adap, Ag, alpha-sAPP, amyloid beta (A4) precursor protein, amyloid beta precursor protein, amyloid-beta-protein, Amyloidogenic glycoprotein, Amyloid precursor, amyloid β (A4) precursor, Amyloid β A4 precursor, amyloid β (A4) precursor protein, amyloid β A4 precursor protein, amyloid β precursor, amyloid β precursor protein, amyloid-β-protein, amyloid β-protein precursor, APPI, appican, APP isoform 1, bet, beta amyloid precursor, betaApp, C, CTfgamma, CVAP, E030013M08RIK, P3, PN2, PN-II, PreA4, protease nexin2, α-sAPP, β-amyloid precursor, β APP, β PP                                                                                                                                                                                                                                                                                                                                                                                                                                                           |
| ATP                    | [[[(2R,3S,4R,5R)-5-(6-aminopurin-9-yl)-3,4-dihydroxyoxolan-2-yl]methoxy-hydroxyphosphoryl] phosphono hydrogen phosphate, 56-65-5, 9-beta-D-arabinofuranosyladenine 5'-triphosphate, 9-β-D-arabinofuranosyladenine 5'-triphosphate, adenosine 5'-(tetrahydrogen triphosphate), adenosine 5'-triphosphate, ATP, ATP4-, C10H16N5O13P3                                                                                                                                                                                                                                                                                                                                                                                                                                                                                                                                                                                                                                                                                                                                      |
| ATPSynthase            | COMPLEX V, C V, Electron Transport Chain Complex V, ETC complex V, F0,f1-Atpase, F0F1 ATP Synthase, F1f0-Atpase, F1F0 ATP Synthase, OxPhosV, RESPIRATORY CHAIN COMPLEX V, Respiratory Complex V                                                                                                                                                                                                                                                                                                                                                                                                                                                                                                                                                                                                                                                                                                                                                                                                                                                                         |
| ATP5F1A                | AIO35633, AL022851, AL023067, alpha subunit of the F1F0 ATP SYNTHASE (COMPLEX V), At, ATP5A, ATP5A1, ATP5A2, ATPA, ATPM, ATP synthase alpha, Atp synthase alpha chain, ATP SYNTHASE alpha subunit, Atp synthase (f0f1), subunit alpha, Atp synthase (f0f1), subunit α, ATP Synthase F1 alpha, ATP synthase F1 subunit alpha, ATP synthase F1 subunit α, ATP Synthase F1 α, ATP synthase, H+ transporting, mitochondrial F1 complex, alpha subunit 1, ATP synthase, H+ transporting, mitochondrial F1 complex, α subunit 1, ATP synthase mitochondrial f1complex, ATP synthase α, Atp synthase α chain, ATP SYNTHASE α subunit, Complex V subunit I, COXPD22, D18ErtD206, D18ErtD206e, F1 atpase, F1 ATPase alpha, F1 ATPase α, hATP1, HEL-S-123m, MC5DN4, Mitochondrial ATPS, Mom, MOM2, OMR, ORM, Q3u452, α subunit of the F1F0 ATP SYNTHASE (COMPLEX V)                                                                                                                                                                                                               |
| ATP5F1B                | ATP5B, ATP5beta, ATP5β, ATPB, Atpd, ATPMB, ATPSB, ATP Synthase Beta, ATP Synthase F1 Beta, ATP synthase F1 subunit beta, ATP synthase F1 subunit β, ATP Synthase F1 β, ATP synthase, H+ transporting mitochondrial F1 complex, beta subunit, ATP synthase, H+ transporting mitochondrial F1 complex, β subunit, ATP Synthase β, Beta atp synthase, F1 ATPase beta, F1 ATPase β, F1 ATP Synthase β, F1 β atpase, F-type ATPase b, H+ ATP Synthase Beta, H+ ATP Synthase β, HEL-S-271, OXPHOS COMPLEX V, subunit B, β atp synthase, β subunit ATP synthase                                                                                                                                                                                                                                                                                                                                                                                                                                                                                                                |
| ATP5F1C                | 1700094F02RIK, ATP5C, ATP5C1, ATP5C1L1, ATP synthase F1 subunit gamma, ATP synthase F1 subunit γ, ATP synthase, H+ transporting, mitochondrial F1 complex, gamma polypeptide 1, ATP synthase, H+ transporting, mitochondrial F1 complex, γ polypeptide 1, F1 γ, γ subunit f1f0 atpase                                                                                                                                                                                                                                                                                                                                                                                                                                                                                                                                                                                                                                                                                                                                                                                   |
| ATP5F1D                | 0610008F14RIK, 150000011RIK, AA960090, A1876556, ATP5D, Atpase D, ATPD, ATP Synthase F1 Delta, ATP synthase F1 subunit delta, ATP synthase F1 subunit δ, ATP Synthase F1 δ, ATP synthase, H+ transporting, mitochondrial F1 complex, delta subunit, ATP synthase, H+ transporting, mitochondrial F1 complex, δ subunit, AU020773, C85518, F1F0 ATPase delta, F1F0 ATPase δ, LOC100910032, LOC687032, LOC690935, MC5DN5                                                                                                                                                                                                                                                                                                                                                                                                                                                                                                                                                                                                                                                  |
| ATP5F1E                | 2410043G19RIK, ATP5E, ATPe, ATP synthase F1 subunit epsilon, ATP synthase F1 subunit ε, AV000645, MC5DN3                                                                                                                                                                                                                                                                                                                                                                                                                                                                                                                                                                                                                                                                                                                                                                                                                                                                                                                                                                |
| ATP5MC1                | ATP5A, ATP5G, ATP5G1, ATP9C, ATP synthase, H+ transporting, mitochondrial F0 complex, subunit C1 (subunit 9), ATP synthase membrane subunit c locus 1                                                                                                                                                                                                                                                                                                                                                                                                                                                                                                                                                                                                                                                                                                                                                                                                                                                                                                                   |
| ATP5MC2                | 1810041M08RIK, ATP5A, ATP5G2, ATP synthase, H+ transporting, mitochondrial F0 complex, subunit C2 (subunit 9), Atp Synthase Lipid-Binding Protein P2 Precursor, ATP synthase membrane subunit c locus 2, LOC100504871                                                                                                                                                                                                                                                                                                                                                                                                                                                                                                                                                                                                                                                                                                                                                                                                                                                   |
| ATP5MC3                | 6030447M23, ATP5G3, ATP synthase, H+ transporting, mitochondrial F0 complex, subunit C3 (subunit 9), ATP synthase membrane subunit c locus 3, ATP Synthase Subunit c, P3                                                                                                                                                                                                                                                                                                                                                                                                                                                                                                                                                                                                                                                                                                                                                                                                                                                                                                |
| ATP5ME                 | 2610008D24RIK, ATP5I, ATP5K, ATP synthase membrane subunit e, Lfm, Lfm1                                                                                                                                                                                                                                                                                                                                                                                                                                                                                                                                                                                                                                                                                                                                                                                                                                                                                                                                                                                                 |
| ATP5MF                 | 1110019H14RIK, ATP5J2, ATP5JL, ATP synthase, H+ transporting, mitochondrial F0 complex, subunit F2, ATP synthase membrane subunit f, LOC684567                                                                                                                                                                                                                                                                                                                                                                                                                                                                                                                                                                                                                                                                                                                                                                                                                                                                                                                          |
| ATP5MG                 | 4933437C06RIK, ATP5JG, ATP5L, ATP synthase (f0f1), subunit g, ATP synthase, H+ transporting, mitochondrial F0 complex, subunit G, ATP synthase membrane subunit g, F1F0-ATP Synthase G Subunit, RGD:1303259                                                                                                                                                                                                                                                                                                                                                                                                                                                                                                                                                                                                                                                                                                                                                                                                                                                             |
| ATP5MGL                | ATP5K2, ATP5L2, ATP synthase membrane subunit g like                                                                                                                                                                                                                                                                                                                                                                                                                                                                                                                                                                                                                                                                                                                                                                                                                                                                                                                                                                                                                    |
| ATP5PB                 | Atp5, ATP5F1, ATP synthase peripheral stalk-membrane subunit b, ATP synthase subunit b, mitochondrial-like, C76477, LOC100911417, PIG47                                                                                                                                                                                                                                                                                                                                                                                                                                                                                                                                                                                                                                                                                                                                                                                                                                                                                                                                 |
| ATP5PD                 | 0610009D10RIK, APT5H, ATP5H, Atp5jd, ATPQ, ATP synthase d subunit, ATP synthase, H+ transporting, mitochondrial F0 complex, subunit D, ATP synthase peripheral stalk subunit d, ATP Synthase Subunit D, H+ ATP Synthase Subunit D                                                                                                                                                                                                                                                                                                                                                                                                                                                                                                                                                                                                                                                                                                                                                                                                                                       |
| ATP5PF                 | ATP5, ATP5A, ATP5J, ATPM, ATP SYNTHASE, Atp synthase (f0f1), subunit f, ATP synthase, H+ transporting, mitochondrial F0 complex, subunit F, ATP synthase peripheral stalk subunit F6, CF6, F6                                                                                                                                                                                                                                                                                                                                                                                                                                                                                                                                                                                                                                                                                                                                                                                                                                                                           |
| ATP5PO                 | ATP5O, ATPO, Atp Synthase, H+ Transporting, Mitochondrial F1 Complex, O Subunit, Atp synthase-mitochondrial f1, ATP synthase peripheral stalk subunit OSCP, D12Wsu28, D12Wsu28e, HMC08D05, OSCP                                                                                                                                                                                                                                                                                                                                                                                                                                                                                                                                                                                                                                                                                                                                                                                                                                                                         |
| BCL2                   | AW986256, B cell leukaemia/lymphoma 2, B cell leukemia/lymphoma 2, Bcl-, Bcl2 alpha, BCL2 apoptosis regulator, BCL2, apoptosis regulator, Bcl2 α, C430015F12RIK, D630044D05RIK, D830018M01RIK, LOC100046608, ORF16, PPP1R50                                                                                                                                                                                                                                                                                                                                                                                                                                                                                                                                                                                                                                                                                                                                                                                                                                             |
| Betasecretase          | β Secretase                                                                                                                                                                                                                                                                                                                                                                                                                                                                                                                                                                                                                                                                                                                                                                                                                                                                                                                                                                                                                                                             |
| Betulinicacid          | (1R,3aS,5aR,5bR,7aR,9S,11aR,11bR,13aR,13bR)-9-hydroxy-5a,5b,8,8,11a-pentamethyl-1-prop-1-en-2-yl-1,2,3,4,5,6,7,7a,9,10,11,11b,12,13,13a,13b-hexadecahydrocyclopenta[a]chrysene-3a-carboxylic acid, 3-hydroxylup-20(29)-en-28-oic acid, 472-15-1, C30H48O3, lup-20(29)-en-28-oic acid, 3beta-hydroxy- (8CI), lup-20(29)-en-28-oic acid, 3-hydroxy-, (3beta)-, topical ALS-357, topical betulinic acid                                                                                                                                                                                                                                                                                                                                                                                                                                                                                                                                                                                                                                                                    |
| cardiolipin            | [(2R)-3-[[[3-[(2R)-2,3-di(octadecanoyloxy)propoxy]-hydroxyphosphoryl]oxy-2-hydroxypropoxy]-hydroxyphosphoryl]oxy-2-octadecanoyloxypropyl] octadecanoate, C81H158O17P2, diphosphatidylglycerol                                                                                                                                                                                                                                                                                                                                                                                                                                                                                                                                                                                                                                                                                                                                                                                                                                                                           |
| CASP3                  | A830040C14RIK, AC-, AC-3, Casp, Caspase-3, CASPASE-3 p20, CC3, CPP, CPP-32, CPP32B, CPP32-beta, CPP32-β, Ice-like cysteine protease, Lice, mld, mldy, SCA-1, Ya, YAMA                                                                                                                                                                                                                                                                                                                                                                                                                                                                                                                                                                                                                                                                                                                                                                                                                                                                                                   |
| CASP8                  | ALPS2B, CAP4, Casp, Caspase-8, FLI, FLICE, MAC, MACH, MCH5, PROCASP8                                                                                                                                                                                                                                                                                                                                                                                                                                                                                                                                                                                                                                                                                                                                                                                                                                                                                                                                                                                                    |
| CASP9                  | AH15399, APAF-3, AW493809, Casp, Casp9 v1, Caspase-9, ICE-, ICE-LAP6, MCH6, PPP1R56                                                                                                                                                                                                                                                                                                                                                                                                                                                                                                                                                                                                                                                                                                                                                                                                                                                                                                                                                                                     |
| CAT                    | 2210418N07, ACATALASIA, Ca, Cas, Cas-1, Cat01, Catalase, Catalase1, Catl, CS, CS1                                                                                                                                                                                                                                                                                                                                                                                                                                                                                                                                                                                                                                                                                                                                                                                                                                                                                                                                                                                       |
| COX4I1                 | AL024441, CoO IV1, CO, COX, COX4, COX4-1, COX4A, COX4I, COXIV, COX IV-1, cytochrome c oxidase subunit 4I1, IV-1, MC4DN16                                                                                                                                                                                                                                                                                                                                                                                                                                                                                                                                                                                                                                                                                                                                                                                                                                                                                                                                                |
| COX4I2                 | COX4, COX4-2, COX4B, COX4L2, COXV-2, cytochrome c oxidase subunit 4I2, dJ857M17.2                                                                                                                                                                                                                                                                                                                                                                                                                                                                                                                                                                                                                                                                                                                                                                                                                                                                                                                                                                                       |
| COX5A                  | AA959768, CoO, CoOX, COX, COX-VA, cytochrome c oxidase subunit 5A, Cytochrome c oxidase subunit va, MC4DN20, Mitochondrial Cytochrome C Oxidase Va, VA                                                                                                                                                                                                                                                                                                                                                                                                                                                                                                                                                                                                                                                                                                                                                                                                                                                                                                                  |
| COX5B                  | COXVB, cytochrome c oxidase subunit 5B                                                                                                                                                                                                                                                                                                                                                                                                                                                                                                                                                                                                                                                                                                                                                                                                                                                                                                                                                                                                                                  |
| COX6A1                 | CMTRID, COX6A, COX6AL, cytochrome c oxidase subunit 6A1, VIaL                                                                                                                                                                                                                                                                                                                                                                                                                                                                                                                                                                                                                                                                                                                                                                                                                                                                                                                                                                                                           |
| COX6A2                 | COX, COX6AH, COXVIAH, Cytochrome c oxidase, polypeptide VIb, cytochrome c oxidase subunit 6A2, MC4DN18, V, VIaH                                                                                                                                                                                                                                                                                                                                                                                                                                                                                                                                                                                                                                                                                                                                                                                                                                                                                                                                                         |
| COX6B1                 | 2010000G05RIK, COX6B, COXG, COX Vlb-1, cytochrome c oxidase subunit 6B1, cytochrome c oxidase, subunit 6B1, MC4DN7                                                                                                                                                                                                                                                                                                                                                                                                                                                                                                                                                                                                                                                                                                                                                                                                                                                                                                                                                      |
| COX6B2                 | 1700067P11RIK, BC048670, COXV, COXVIB2, CT59, cytochrome c oxidase subunit 6B2                                                                                                                                                                                                                                                                                                                                                                                                                                                                                                                                                                                                                                                                                                                                                                                                                                                                                                                                                                                          |
| COX6C                  | COVlc, Cox6c2, COX-Vlc, cytochrome c oxidase subunit 6C, cytochrome c oxidase subunit 6C2, EG621837, Gm6265                                                                                                                                                                                                                                                                                                                                                                                                                                                                                                                                                                                                                                                                                                                                                                                                                                                                                                                                                             |
| COX7A1                 | COX, COX7, COX7A, COX7AH, COX7AM, cytochrome c oxidase subunit 7A1                                                                                                                                                                                                                                                                                                                                                                                                                                                                                                                                                                                                                                                                                                                                                                                                                                                                                                                                                                                                      |
| COX7A2                 | COX, Cox7, COX7A3, COX7AL, COX7AL1, COXVIIAL, cytochrome c oxidase subunit 7A2, VIIAL                                                                                                                                                                                                                                                                                                                                                                                                                                                                                                                                                                                                                                                                                                                                                                                                                                                                                                                                                                                   |
| COX7B                  | 1110004F07RIK, APLCC, C80563, cytochrome c oxidase subunit 7B, LSDMCA2                                                                                                                                                                                                                                                                                                                                                                                                                                                                                                                                                                                                                                                                                                                                                                                                                                                                                                                                                                                                  |
| COX7B2                 | 4930503B16RIK, cytochrome c oxidase subunit 7B2                                                                                                                                                                                                                                                                                                                                                                                                                                                                                                                                                                                                                                                                                                                                                                                                                                                                                                                                                                                                                         |
| COX7C                  | AI648091, COX, Cox7c1, COXVIIc, cytochrome c oxidase subunit 7C                                                                                                                                                                                                                                                                                                                                                                                                                                                                                                                                                                                                                                                                                                                                                                                                                                                                                                                                                                                                         |
| COX8A                  | COX, COX8, COX8-2, COX8L, COXVIII, cytochrome c oxidase subunit 8A, cytochrome c oxidase subunit viii, Cytochrome C Oxidase Subunit Viiaa, Cytochrome oxidase subunit 8, MC4DN15, VIII, VIII-L                                                                                                                                                                                                                                                                                                                                                                                                                                                                                                                                                                                                                                                                                                                                                                                                                                                                          |
| COX8C                  | 1700007F21RIK, COX8-, COX8-3, COXV, COXVIII-3, cytochrome c oxidase subunit 8C                                                                                                                                                                                                                                                                                                                                                                                                                                                                                                                                                                                                                                                                                                                                                                                                                                                                                                                                                                                          |
| CPT1                   | Cpt-i                                                                                                                                                                                                                                                                                                                                                                                                                                                                                                                                                                                                                                                                                                                                                                                                                                                                                                                                                                                                                                                                   |
| Cyanide                | 57-12-5, CN-, cyanide, cyanide(1-)                                                                                                                                                                                                                                                                                                                                                                                                                                                                                                                                                                                                                                                                                                                                                                                                                                                                                                                                                                                                                                      |
| CYB5R3                 | 0610016L08RIK, 2500002N19RIK, B5R, C85115, cytochrome b5 reductase 3, Di, Dia, DIA1, Nadhcb5, NADH Cytochrome B5 Reductase, RNNADHCB5, WU:Cyb5r3                                                                                                                                                                                                                                                                                                                                                                                                                                                                                                                                                                                                                                                                                                                                                                                                                                                                                                                        |
| CYCS                   | CYC, CYCSA, CYTC, CYTOC, CYTOCHROME C, cytochrome c, somatic, cytochrome c, somatic-like, ENSMUSG0000058927, HCS, LOC100363502, THC4, X laevis XLCL2                                                                                                                                                                                                                                                                                                                                                                                                                                                                                                                                                                                                                                                                                                                                                                                                                                                                                                                    |
| Cytochromebc1          | 1.10.2.2, coenzyme Q-cytochrome c reductase, coenzyme QH2-cytochrome c reductase, Complex III, CoQH2-cytochrome c oxidoreductase, dihydrocoenzyme Q-cytochrome c reductase, ETC complex III, Mitochondrial Complex 3, Mitochondrial Complex III, Mitochondrial Electron Transport Chain Complex 3, mitochondrial electron transport complex III, Oxphos Complex III, QH2:cytochrome c oxidoreductase, reduced coenzyme Q-cytochrome c reductase, reduced ubiquinone-cytochrome c oxidoreductase, reduced ubiquinone-cytochrome c reductase, complex III (mitochondrial electron transport), RESPIRATORY CHAIN COMPLEX III, RESPIRATORY CHAIN III COMPLEX III, ubihydroquinol:cytochrome c oxidoreductase, ubiquinol-cytochrome c1 oxidoreductase, ubiquinol-cytochrome c-2 oxidoreductase, ubiquinol-cytochrome c2 reductase, ubiquinol-cytochrome c oxidoreductase, ubiquinol-cytochrome-c reductase, ubiquinol:ferricytochrome-c oxidoreductase, ubiquinone-cytochrome b-c1 oxidoreductase, ubiquinone-cytochrome c oxidoreductase, ubiquinone-cytochrome c reductase |



| Symbol                  | Synonym(s)                                                                                                                                                                                                                                                                                                                                                                                                                                                                                                                                                                                                                                                                                                                                                                                                                                                                                                                                                                                                                                                                                                                                                                                                                                                                                                                                                                                                                                                                                                                                                                                                                                                                                                                                                                                                                                                                                                                                                                        |
|-------------------------|-----------------------------------------------------------------------------------------------------------------------------------------------------------------------------------------------------------------------------------------------------------------------------------------------------------------------------------------------------------------------------------------------------------------------------------------------------------------------------------------------------------------------------------------------------------------------------------------------------------------------------------------------------------------------------------------------------------------------------------------------------------------------------------------------------------------------------------------------------------------------------------------------------------------------------------------------------------------------------------------------------------------------------------------------------------------------------------------------------------------------------------------------------------------------------------------------------------------------------------------------------------------------------------------------------------------------------------------------------------------------------------------------------------------------------------------------------------------------------------------------------------------------------------------------------------------------------------------------------------------------------------------------------------------------------------------------------------------------------------------------------------------------------------------------------------------------------------------------------------------------------------------------------------------------------------------------------------------------------------|
| Cytochrome-c oxidase    | 1.9.3.1, Complex IV, complex IV (mitochondrial electron transport), COX, COXIV, cytochrome a3, cytochrome aa3, cytochrome oxidase, Cyto-c oxi, ETC complex IV, ferrocytochrome c oxidase, ferrocytochrome-c: oxygen oxidoreductase, indophenol oxidase, MITOCHONDRIAL COMPLEX IV, MITOCHONDRIAL RESPIRATORY CHAIN COMPLEX IV, NADH cytochrome c oxidase, Oxphos Complex IV, RESPIRATORY CHAIN COMPLEX IV, Warburg respiratory enzyme, Warburg's respiratory enzyme, Warburgs respiratory enzyme                                                                                                                                                                                                                                                                                                                                                                                                                                                                                                                                                                                                                                                                                                                                                                                                                                                                                                                                                                                                                                                                                                                                                                                                                                                                                                                                                                                                                                                                                   |
| DEAEH                   | 2,2'-(1,1,2-diethylethylene)bis(p-phenyleneoxy))bis(triethyl)amine, 2-[4-[4-[2-(diethylamino)ethoxy]phenyl]hexan-3-yl]phenoxy]-N,N-diethylethanamine, 2691-45-4, 4,4'-bis(beta-diethylaminoethoxy)alpha,beta-diethyldiphenylethane, 4,4'-bis(beta-diethylaminoethoxy)alpha,beta-diethyldiphenylethane, 4,4'-diethylaminoethoxyhexestrol, 69-14-7, C30H48N2O2, coralgil, diethylaminoethoxyhexestrol, trimanyl                                                                                                                                                                                                                                                                                                                                                                                                                                                                                                                                                                                                                                                                                                                                                                                                                                                                                                                                                                                                                                                                                                                                                                                                                                                                                                                                                                                                                                                                                                                                                                     |
| Dexamethasone           | 137098-19-2, 23495-06-9, 50-02-2, 8054-59-9, (8S,9R,10S,11S,13S,14S,16R,17R)-9-fluoro-11,17-dihydroxy-17-(2-hydroxyacetyl)-10,13,16-trimethyl-6,7,8,11,12,14,15,16-octahydrocyclopenta[a]phenanthren-3-one, 906422-84-2, 9-fluoro-11b,17,21-trihydroxy- 16a-methylpregna-1,4-diene-3,20-dione, Adexone, Aeroseb-D, Aeroseb-Dex, Anaflogistico, Aphtasolon, Aphtasolone, AR-1105-CF1, AR-1105-CF2, Auxiron, Azium, Bisu Ds, C22H29FO5, Calonat, Corson, Corsone, Cortisumman, Decacort, Decacortin, Decadern, Decadron, Decadron-La, Decadron Tablets, Decadron Tablets, Elixir, Decagel, Decaject, Decaject L.A., Decalix, Decameth, Decarex, Decasone, Decaspray, Decatancyll, Dekacort, Deltafluorene, Dergamin, Deronil, Desadrene, Desameton, Deseronil, DEX, Dexa, Dexacen-4, Dexacort, Dexacortal, Dexa-Cortidelt, Dexacortin, Dexa-Cortisyl, Dexadeltone, Dexafarma, Dexair, Dexalona, Dexamtil, Dexa Mamallet, Dexa-Mamallet, Dexameth, Dexamethasone Intensol, dexamethasone lipid microsphere, dexamethazone, Dexamonozon, Dexapalcort, Dexapox, Dexaprol, Dexam, Dexa-Scheroson, Dexa-Sine, Dexasone, Dexasone, Dex-Idc, Dexinolol, Dexinoral, Dexone, Dexone 0.5, Dexone 0.75, Dexone 1.5, Dexone 4, Dexonium, Dexpak, Dextelan, Dextenza, dextromethasone, Dexycu, Dexycu Kit, Dezone, Dinormon, Dms, Fluormone, Fluorocort, Fortecortin, Gammacorten, glucocorticoid dexamethasone, Hemady, Hexadecadrol, Hexadrol, Hexadrol Elixir, Hexadrol Tablets, Hi-Dex, IontoDex, Isopto-Dex, LenaDex, Lokalisol F, Loverine, Luxazone, Maxidex, Mediamethasone, methylfluorprednisolone, Mexidex, Millicorten, Mymethasone, Oradexon, Orgadron, Ozurdex, Pet Derm Iii, Pet-Derm Iii, Policort, Posurdex, Prednisolone F, Prednisolon F, prednisolon F, pregna-1,4-diene-3,20-dione, 9-fluoro-11,17,21-trihydroxy-16-methyl-, (11beta,16alpha)-, Sk-Dexamethasone, Spoloven, Sunia Sol D, Superprednol, sustained release episcleral dexamethasone, Turbinaire, Visumetazone |
| DHODH                   | 2810417D19Rik, A1834883, DHodehase, DHOH, dihydroorotate dehydrogenase, dihydroorotate dehydrogenase (quinone), POADS, URA1                                                                                                                                                                                                                                                                                                                                                                                                                                                                                                                                                                                                                                                                                                                                                                                                                                                                                                                                                                                                                                                                                                                                                                                                                                                                                                                                                                                                                                                                                                                                                                                                                                                                                                                                                                                                                                                       |
| Dopamine                | 1,2-benzenediol, 4-(2-aminoethyl)-, 1,2-benzenediol, 4-(2-aminoethyl)- (9CI), 4-(2-aminoethyl)benzene-1,2-diol, 50444-17-2, 51-61-6, 62-31-7, C8H11NO2, DA, dopamine HCl, dopamine hydrochloride, hydroxytyramine, Intropin, Revimine                                                                                                                                                                                                                                                                                                                                                                                                                                                                                                                                                                                                                                                                                                                                                                                                                                                                                                                                                                                                                                                                                                                                                                                                                                                                                                                                                                                                                                                                                                                                                                                                                                                                                                                                             |
| F1 ATPsynthase          | F1, F1 ATP Synthase                                                                                                                                                                                                                                                                                                                                                                                                                                                                                                                                                                                                                                                                                                                                                                                                                                                                                                                                                                                                                                                                                                                                                                                                                                                                                                                                                                                                                                                                                                                                                                                                                                                                                                                                                                                                                                                                                                                                                               |
| FAD                     | 146-14-5, 1H-purin-6-amine, flavin dinucleotide, 1H-purin-6-amine, flavine dinucleotide, [[[2R,3S,4R,5R)-5-(6-aminopurin-9-yl)-3,4-dihydroxyoxolan-2-yl]methoxy-hydroxyphosphoryl] [5-(7,8-dimethyl-2,4-dioxobenz[ <i>g</i> ]pteridin-10-yl)-2,3,4-trihydroxypentyl] hydrogen phosphate, adenosine 5'-(trihydrogen pyrophosphate), 5'-5'-ester with riboflavin, C27H33N9O15P2, FAD, flavin adenine dinucleotide, flavine adenosine diphosphate, flavitan, riboflavin 5'-adenosine diphosphate, riboflavin 5'-(trihydrogen diphosphate), 5'-5'-ester with adenosine, riboflavin 5'-(trihydrogen diphosphate), P'-5'-ester with adenosine                                                                                                                                                                                                                                                                                                                                                                                                                                                                                                                                                                                                                                                                                                                                                                                                                                                                                                                                                                                                                                                                                                                                                                                                                                                                                                                                           |
| FADH2                   | 1,5-dihydro-FAD, 1910-41-4, [[[2R,3S,4R,5R)-5-(6-aminopurin-9-yl)-3,4-dihydroxyoxolan-2-yl]methoxy-hydroxyphosphoryl] [5-(7,8-dimethyl-2,4-dioxo-1,5-dihydrobenzo[ <i>g</i> ]pteridin-10-yl)-2,3,4-trihydroxypentyl] hydrogen phosphate, C27H35N9O15P2                                                                                                                                                                                                                                                                                                                                                                                                                                                                                                                                                                                                                                                                                                                                                                                                                                                                                                                                                                                                                                                                                                                                                                                                                                                                                                                                                                                                                                                                                                                                                                                                                                                                                                                            |
| FIS1                    | 2010003O14Rik, CGI-135, fission, mitochondrial 1, Riken cDNA 2010003O14, TTC11                                                                                                                                                                                                                                                                                                                                                                                                                                                                                                                                                                                                                                                                                                                                                                                                                                                                                                                                                                                                                                                                                                                                                                                                                                                                                                                                                                                                                                                                                                                                                                                                                                                                                                                                                                                                                                                                                                    |
| FURIN                   | 9130404I01RIK, BASIC-AMINO-ACID-SPECIFIC FURIN, Fu, FUR, FURIN FROM PACE, furin (paired basic amino acid cleaving enzyme), furin, paired basic amino acid cleaving enzyme, PA, PACE, Pcs, PCSK3, SP, SPC1                                                                                                                                                                                                                                                                                                                                                                                                                                                                                                                                                                                                                                                                                                                                                                                                                                                                                                                                                                                                                                                                                                                                                                                                                                                                                                                                                                                                                                                                                                                                                                                                                                                                                                                                                                         |
| Gammasecretase          | Gamma Secretase, Secretase $\gamma$ , $\gamma$ -Secretase                                                                                                                                                                                                                                                                                                                                                                                                                                                                                                                                                                                                                                                                                                                                                                                                                                                                                                                                                                                                                                                                                                                                                                                                                                                                                                                                                                                                                                                                                                                                                                                                                                                                                                                                                                                                                                                                                                                         |
| GLRX2                   | 1700010P22Rik, A1645710, CGI-133, glutaredoxin 2, glutaredoxin 2 (thioltransferase), Grx, GRX2                                                                                                                                                                                                                                                                                                                                                                                                                                                                                                                                                                                                                                                                                                                                                                                                                                                                                                                                                                                                                                                                                                                                                                                                                                                                                                                                                                                                                                                                                                                                                                                                                                                                                                                                                                                                                                                                                    |
| GPD2                    | AA408484, A1448216, Alpha-gpd, AU021455, AW494132, GDH2, Gdm1, glycerol-3-phosphate dehydrogenase 2, glycerol phosphate dehydrogenase 2, mitochondrial, Glycerophosphate dehydrogenase, GPDH, Gpdh-m, GPDm, m-GDH, mGPDH, mtGPDH, Tisp38, alpha-gpd                                                                                                                                                                                                                                                                                                                                                                                                                                                                                                                                                                                                                                                                                                                                                                                                                                                                                                                                                                                                                                                                                                                                                                                                                                                                                                                                                                                                                                                                                                                                                                                                                                                                                                                               |
| GPX4                    | glutathione peroxidase 4, GSHPx-4, Lipid peroxidase, MCSP, mTPHG, mTPHGPx, PHG, PHGPx, phospholipid hydroperoxidase, SMDS, sn, snGPx, snPHGPx                                                                                                                                                                                                                                                                                                                                                                                                                                                                                                                                                                                                                                                                                                                                                                                                                                                                                                                                                                                                                                                                                                                                                                                                                                                                                                                                                                                                                                                                                                                                                                                                                                                                                                                                                                                                                                     |
| GPX7                    | 3110050F08RIK, A1327032, CL683, glutathione peroxidase 7, GPX, GPX6, GSHPx-7, NPGPX                                                                                                                                                                                                                                                                                                                                                                                                                                                                                                                                                                                                                                                                                                                                                                                                                                                                                                                                                                                                                                                                                                                                                                                                                                                                                                                                                                                                                                                                                                                                                                                                                                                                                                                                                                                                                                                                                               |
| GSH                     | (2S)-2-amino-5-[[[2(R)-1-(carboxymethylamino)-1-oxo-3-sulfanypropan-2-yl]amino]-5-oxopentanoic acid, (2S)-2-amino-5-[[[2(R)-1-(carboxymethylamino)-1-oxo-3-sulphanypropan-2-yl]amino]-5-oxopentanoic acid, 70-18-8, C10H17N3O6S, gamma-Glu-Cys-Gly, gamma L-Glu L-Cys Gly, gamma-L-glutamylcysteinylglycine, gamma L glutamyl L cysteinylglycine, glutathione-reduced, glycine, N-(N-L-gamma-glutamyl-L-cysteinyl)-, glycine, N-(N-L- $\gamma$ -glutamyl-L-cysteinyl)-, GSH, L-glutathione, reduced glutathione, $\gamma$ -Glu-Cys-Gly, $\gamma$ L-Glu L-Cys Gly, $\gamma$ -L-glutamylcysteinylglycine, $\gamma$ L glutamyl L cysteinylglycine                                                                                                                                                                                                                                                                                                                                                                                                                                                                                                                                                                                                                                                                                                                                                                                                                                                                                                                                                                                                                                                                                                                                                                                                                                                                                                                                    |
| GSR                     | A1325518, D8Ert238, D8Ert238e, glutathione-disulfide reductase, Glutathione reductase, GR, Gr-1, Gred, GRX, GSRD, HEL-75, HEL-S-122m                                                                                                                                                                                                                                                                                                                                                                                                                                                                                                                                                                                                                                                                                                                                                                                                                                                                                                                                                                                                                                                                                                                                                                                                                                                                                                                                                                                                                                                                                                                                                                                                                                                                                                                                                                                                                                              |
| GSSG                    | 27025-41-8, (2S)-2-amino-5-[[[2(R)-3-[[[2(R)-2-[[[(4S)-4-amino-4-carboxybutanoyl]amino]-3-(carboxymethylamino)-3-oxopropyl]disulfanyl]-1-(carboxymethylamino)-1-oxopropan-2-yl]amino]-5-oxopentanoic acid, bis(gamma-glutamyl-L-cysteinylglycine) disulfide, bis( $\gamma$ -glutamyl-L-cysteinylglycine) disulfide, C20H32N6O12S2, glutathione, oxidized, GSSG, oxiglutathione                                                                                                                                                                                                                                                                                                                                                                                                                                                                                                                                                                                                                                                                                                                                                                                                                                                                                                                                                                                                                                                                                                                                                                                                                                                                                                                                                                                                                                                                                                                                                                                                    |
| H2O2                    | 7722-84-1, A-101, Colgate Peroxyl, Eskata, H2O2, hydrogen dioxide, hydrogen peroxide, peroxy mouthwash, urea hydrogen peroxide                                                                                                                                                                                                                                                                                                                                                                                                                                                                                                                                                                                                                                                                                                                                                                                                                                                                                                                                                                                                                                                                                                                                                                                                                                                                                                                                                                                                                                                                                                                                                                                                                                                                                                                                                                                                                                                    |
| HSD17B10                | 17b-HSD10, ABAD, Ad, Ads9, CAMR, DUPxP11.22, ER, ERAB, Hadh, HADH2, HCD2, HSD10, HSD10MD, hydroxysteroid (17-beta) dehydrogenase 10, hydroxysteroid 17-beta dehydrogenase 10, hydroxysteroid (17- $\beta$ ) dehydrogenase 10, hydroxysteroid 17- $\beta$ dehydrogenase 10, hydroxysteroid dehydrogenase 10, MHBD, MRPP2, MRX17, MRX31, MRXS10, SCHAD, SDR5C1, XH98G2                                                                                                                                                                                                                                                                                                                                                                                                                                                                                                                                                                                                                                                                                                                                                                                                                                                                                                                                                                                                                                                                                                                                                                                                                                                                                                                                                                                                                                                                                                                                                                                                              |
| HTRA2                   | A1481710, Htr, HtrA serine peptidase 2, MGCA8, mnd, mnd2, O, OMI, PARK13, Pr, PRSS25                                                                                                                                                                                                                                                                                                                                                                                                                                                                                                                                                                                                                                                                                                                                                                                                                                                                                                                                                                                                                                                                                                                                                                                                                                                                                                                                                                                                                                                                                                                                                                                                                                                                                                                                                                                                                                                                                              |
| Hydro-peroxide          | RO2H                                                                                                                                                                                                                                                                                                                                                                                                                                                                                                                                                                                                                                                                                                                                                                                                                                                                                                                                                                                                                                                                                                                                                                                                                                                                                                                                                                                                                                                                                                                                                                                                                                                                                                                                                                                                                                                                                                                                                                              |
| JNK                     | JNK 54/46, Jnk p56, JNK/SAPK, JUN KINASE, p40, p47, Sapk/Jnk                                                                                                                                                                                                                                                                                                                                                                                                                                                                                                                                                                                                                                                                                                                                                                                                                                                                                                                                                                                                                                                                                                                                                                                                                                                                                                                                                                                                                                                                                                                                                                                                                                                                                                                                                                                                                                                                                                                      |
| LPS                     | C211H376N8O126P6, endotoxin, endotoxin protein, lipopolysaccharides, LPS, TLR4 agonist LPS                                                                                                                                                                                                                                                                                                                                                                                                                                                                                                                                                                                                                                                                                                                                                                                                                                                                                                                                                                                                                                                                                                                                                                                                                                                                                                                                                                                                                                                                                                                                                                                                                                                                                                                                                                                                                                                                                        |
| LRRK2                   | 4921513O20RIK, 9330188B09RIK, AUA561911, cI-4, cI-46, D630001M17RIK, DARDARIN, DKFZP434H2111, FLJ45829, Gm927, leucine-rich repeat kinase 2, PARK8, RPK7, ROCO2                                                                                                                                                                                                                                                                                                                                                                                                                                                                                                                                                                                                                                                                                                                                                                                                                                                                                                                                                                                                                                                                                                                                                                                                                                                                                                                                                                                                                                                                                                                                                                                                                                                                                                                                                                                                                   |
| MAOA                    | 1110061B18RIK, AA407771, BRNR5, MA, Mao, Monoamine Oxidase A, NC61C12.R1, type A monoamine oxidase                                                                                                                                                                                                                                                                                                                                                                                                                                                                                                                                                                                                                                                                                                                                                                                                                                                                                                                                                                                                                                                                                                                                                                                                                                                                                                                                                                                                                                                                                                                                                                                                                                                                                                                                                                                                                                                                                |
| MAOB                    | 6330414K01RIK, MAO, monoamine oxidase B                                                                                                                                                                                                                                                                                                                                                                                                                                                                                                                                                                                                                                                                                                                                                                                                                                                                                                                                                                                                                                                                                                                                                                                                                                                                                                                                                                                                                                                                                                                                                                                                                                                                                                                                                                                                                                                                                                                                           |
| MAP2K4                  | JNKK, JNKK1, MAPK/ERK KINASE-1, MAPKK4, MEK4, mitogen-activated protein kinase kinase 4, MKK4, PRKMK4, SAPKK-1, Sek, SEK1, Ser, SERK1, SKK1                                                                                                                                                                                                                                                                                                                                                                                                                                                                                                                                                                                                                                                                                                                                                                                                                                                                                                                                                                                                                                                                                                                                                                                                                                                                                                                                                                                                                                                                                                                                                                                                                                                                                                                                                                                                                                       |
| Mitochondrial complex 1 | 1.6.5.3, coenzyme Q reductase, complex 1 dehydrogenase, COMPLEX I, complex I (electron transport chain), complex I (mitochondrial electron transport), complex I (NADH:Q1 oxidoreductase), dihydronicotinamide adenine dinucleotide-coenzyme Q reductase, DPNH-coenzyme Q reductase, DPNH-ubiquinone reductase, electron transfer complex I, ETC complex I, Mitochondrial Complex I, mitochondrial dehydrogenase, Mitochondrial Electron Transport Chain Complex 1, mitochondrial electron transport complex 1, mitochondrial electron transport complex I, Mitochondrial Respiratory Chain Complex 1, NADH2 dehydrogenase (ubiquinone), NADH2:ubiquinone oxidoreductase, NADH coenzyme Q1 reductase, NADH-coenzyme Q oxidoreductase, NADH Coenzyme Q Reductase, NADH-CoQ oxidoreductase, NADH-CoQ reductase, NADH Cytochrome C Reductase, NADH Dehydrogenase, NADh:Q2 Oxidoreductase, NADH oxidoreductase, NADH-Q6 oxidoreductase, NADH-ubiquinone-1 reductase, NADH-ubiquinone oxidoreductase, NADH:ubiquinone oxidoreductase complex, NADH Ubiquinone Reductase, reduced nicotinamide adenine dinucleotide-coenzyme Q reductase, Respiratory Chain Complex I, respiratory complex I, type 1 dehydrogenase, ubiquinone, ubiquinone reductase                                                                                                                                                                                                                                                                                                                                                                                                                                                                                                                                                                                                                                                                                                                                    |
| MMP+                    | 1-methyl-4-phenylpyridin-1-ium, 1-methyl-4-phenylpyridine, [3H]MPP+, 48134-75-4, C12H12N+, cyperquat, MPP+, N-methyl-4-phenylpyridine, N-methyl-4-phenylpyridinium, pyridinium, 1-methyl-4-phenyl-, pyridinium, 1-methyl-4-phenyl- (9CI)                                                                                                                                                                                                                                                                                                                                                                                                                                                                                                                                                                                                                                                                                                                                                                                                                                                                                                                                                                                                                                                                                                                                                                                                                                                                                                                                                                                                                                                                                                                                                                                                                                                                                                                                          |
| MPTP                    | 1,2,3,6-tetrahydro-1-methyl-4-phenylpyridine, 1-methyl-4-phenyl-3,6-dihydro-2H-pyridine, 28289-54-5, C12H15N, MPTP, pyridine, 1,2,3,6-tetrahydro-1-methyl-4-phenyl-                                                                                                                                                                                                                                                                                                                                                                                                                                                                                                                                                                                                                                                                                                                                                                                                                                                                                                                                                                                                                                                                                                                                                                                                                                                                                                                                                                                                                                                                                                                                                                                                                                                                                                                                                                                                               |
| MT-CO1                  | Co1, COI, COI, COI Mitochondrial Subunit I, COX1, COX-I, cytochrome c oxidase I, Cytochrome C Oxidase Subunit 1, cytochrome c oxidase subunit I, MT-COI, X57780                                                                                                                                                                                                                                                                                                                                                                                                                                                                                                                                                                                                                                                                                                                                                                                                                                                                                                                                                                                                                                                                                                                                                                                                                                                                                                                                                                                                                                                                                                                                                                                                                                                                                                                                                                                                                   |
| MT-CO2                  | CIV-1, Co2, COII, COX2, COX II, CYTOXIDASE II, cytochrome c oxidase subunit II, CYTOCHROME OXIDASE subunit 2, CytoX II, Pil7                                                                                                                                                                                                                                                                                                                                                                                                                                                                                                                                                                                                                                                                                                                                                                                                                                                                                                                                                                                                                                                                                                                                                                                                                                                                                                                                                                                                                                                                                                                                                                                                                                                                                                                                                                                                                                                      |
| MT-CO3                  | COIII, COX3, COX III, CY3, Cytochrome C Oxidase Subunit 3, cytochrome c oxidase subunit III, CytoX III, Mitochondrial cytochrome oxidase III, Similar to bcdo                                                                                                                                                                                                                                                                                                                                                                                                                                                                                                                                                                                                                                                                                                                                                                                                                                                                                                                                                                                                                                                                                                                                                                                                                                                                                                                                                                                                                                                                                                                                                                                                                                                                                                                                                                                                                     |
| MT-CYB                  | CYTB, cytochrome b, MITOCHONDRIAL CYTOCHROME B, mt-Cytb, mt-Cytb-201, mt-Cytb-NP 904340, Similar to cytochrome b                                                                                                                                                                                                                                                                                                                                                                                                                                                                                                                                                                                                                                                                                                                                                                                                                                                                                                                                                                                                                                                                                                                                                                                                                                                                                                                                                                                                                                                                                                                                                                                                                                                                                                                                                                                                                                                                  |
| MT-ND4                  | NADH dehydrogenase subunit 4, Nadh ubiquinone oxidoreductase chain 4, ND4                                                                                                                                                                                                                                                                                                                                                                                                                                                                                                                                                                                                                                                                                                                                                                                                                                                                                                                                                                                                                                                                                                                                                                                                                                                                                                                                                                                                                                                                                                                                                                                                                                                                                                                                                                                                                                                                                                         |
| MT-ND4L                 | NADH dehydrogenase subunit 4L, ND4L                                                                                                                                                                                                                                                                                                                                                                                                                                                                                                                                                                                                                                                                                                                                                                                                                                                                                                                                                                                                                                                                                                                                                                                                                                                                                                                                                                                                                                                                                                                                                                                                                                                                                                                                                                                                                                                                                                                                               |
| MT-ND5                  | 0610001I05RIK, Ndh5, NADH dehydrogenase subunit 5, ND5                                                                                                                                                                                                                                                                                                                                                                                                                                                                                                                                                                                                                                                                                                                                                                                                                                                                                                                                                                                                                                                                                                                                                                                                                                                                                                                                                                                                                                                                                                                                                                                                                                                                                                                                                                                                                                                                                                                            |
| Myxothiazol             | 2,6-heptadienamide, 7-(2'-(1,6-dimethyl-2,4-heptadienyl)(2,4'-bithiazol-4-yl))-3,5-dimethoxy-4-methyl-, 2,6-heptadienamide, 7-(2'-(1S,2E,4E)-1,6-dimethyl-2,4-heptadienyl)(2,4'-bithiazol-4-yl))-3,5-dimethoxy-4-methyl-, (2E,4R,5S,6E)-, (2E,4R,5S,6E)-3,5-dimethoxy-4-methyl-7-[2-[2-[(3E,5E)-7-methylocta-3,5-dien-2-yl]-1,3-thiazol-4-yl]-1,3-thiazol-4-yl]hepta-2,6-dienamide, 76706-55-3, C25H33N3O3S2                                                                                                                                                                                                                                                                                                                                                                                                                                                                                                                                                                                                                                                                                                                                                                                                                                                                                                                                                                                                                                                                                                                                                                                                                                                                                                                                                                                                                                                                                                                                                                      |
| NAD+                    | [[[2(R,3S,4R,5R)-5-(6-aminopurin-9-yl)-3,4-dihydroxyoxolan-2-yl]methoxy-hydroxyphosphoryl] [2(R,3S,4R,5R)-5-(3-carbamoylpyridin-1-ium-1-yl)-3,4-dihydroxyoxolan-2-yl]methyl hydrogen phosphate, 53-84-9, adenosine 5'-(trihydrogen diphosphate), P'-5'-ester with 3-(aminocarbonyl)-1-beta-D-ribofuranosylpyridinium, inner salt, adenosine 5'-(trihydrogen diphosphate), P'-5'-ester with 3-(aminocarbonyl)-1- $\beta$ -D-ribofuranosylpyridinium, inner salt, beta-NAD+, beta-nicotinamide adenine dinucleotide+, C21H28N7O14P2+, NAD, $\beta$ -NAD+, $\beta$ -nicotinamide adenine dinucleotide+                                                                                                                                                                                                                                                                                                                                                                                                                                                                                                                                                                                                                                                                                                                                                                                                                                                                                                                                                                                                                                                                                                                                                                                                                                                                                                                                                                               |
| NADH                    | [[[2(R,3S,4R,5R)-5-(6-aminopurin-9-yl)-3,4-dihydroxyoxolan-2-yl]methoxy-hydroxyphosphoryl] [2(R,3S,4R,5R)-5-(3-carbamoyl-4H-pyridin-1-yl)-3,4-dihydroxyoxolan-2-yl]methyl hydrogen phosphate, 58-68-4, 606-68-8, adenosine 5'-(trihydrogen diphosphate), P'-5'-ester with 1,4-dihydro-1-beta-D-ribofuranosyl-3-pyridinecarboxamide, adenosine 5'-(trihydrogen diphosphate), P'-5'-ester with 1,4-dihydro-1- $\beta$ -D-ribofuranosyl-3-pyridinecarboxamide, beta-NADH, C21H29N7O14P2, dihydronicotinamide-adenine dinucleotide, dihydronicotinamide mononucleotide, NADH2, nicotinamide dinucleotide, $\beta$ -NADH                                                                                                                                                                                                                                                                                                                                                                                                                                                                                                                                                                                                                                                                                                                                                                                                                                                                                                                                                                                                                                                                                                                                                                                                                                                                                                                                                               |
| NADPH                   | 2646-71-1, [[[2R,3R,4R,5R)-5-(6-aminopurin-9-yl)-3-hydroxy-4-phosphonoxyoxolan-2-yl]methoxy-hydroxyphosphoryl] [[2R,3S,4R,5R)-5-(3-carbamoyl-4H-pyridin-1-yl)-3,4-dihydroxyoxolan-2-yl]methyl hydrogen phosphate, 53-57-6, adenosine 5'-(trihydrogen diphosphate), 2'-(dihydrogen phosphate), P'-5'-ester with 1,4-dihydro-1-beta-D-ribofuranosyl-3-pyridinecarboxamide, adenosine 5'-(trihydrogen diphosphate), 2'-(dihydrogen phosphate), P'-5'-ester with 1,4-dihydro-1- $\beta$ -D-ribofuranosyl-3-pyridinecarboxamide, C21H30N7O17P3, dihydronicotinamide-adenine dinucleotide phosphate, NADPH tetrasodium salt                                                                                                                                                                                                                                                                                                                                                                                                                                                                                                                                                                                                                                                                                                                                                                                                                                                                                                                                                                                                                                                                                                                                                                                                                                                                                                                                                             |
| NCSTN                   | 9430068N19RIK, AA727311, APH2, ATAG1874, D1Dau13, D1Dau13e, KIA0253, mKIAA0253, Nc, NCT, ni, NICASTRIN                                                                                                                                                                                                                                                                                                                                                                                                                                                                                                                                                                                                                                                                                                                                                                                                                                                                                                                                                                                                                                                                                                                                                                                                                                                                                                                                                                                                                                                                                                                                                                                                                                                                                                                                                                                                                                                                            |



| Symbol                                          | Synonym(s)                                                                                                                                                                                                                                                                                                                                                                                                                                                                                                                                                                                                                                                                                                                                                                                          |
|-------------------------------------------------|-----------------------------------------------------------------------------------------------------------------------------------------------------------------------------------------------------------------------------------------------------------------------------------------------------------------------------------------------------------------------------------------------------------------------------------------------------------------------------------------------------------------------------------------------------------------------------------------------------------------------------------------------------------------------------------------------------------------------------------------------------------------------------------------------------|
| NDUFA10                                         | 2900053E13Rik, CI-42k, CI-42KD, Complex I-42KD, LOC101927147, MC1DN22, NADH dehydrogenase (ubiquinone) 1 alpha subcomplex 10-like 1, NADH dehydrogenase [ubiquinone] 1 alpha subcomplex subunit 10, NADH dehydrogenase (ubiquinone) 1 alpha subcomplex 10-like 1, NADH dehydrogenase [ubiquinone] 1 alpha subcomplex subunit 10, NADH:ubiquinone oxidoreductase subunit A10, ndufa10l, Ndufa10l                                                                                                                                                                                                                                                                                                                                                                                                     |
| NDUFA11                                         | 2010012C24Rik, AV006275, B14.7, CI-B14.7, Complex I-B14.7, EG239760, Gm4943, MC1DN14, NADH:ubiquinone oxidoreductase subunit A11, NADH:ubiquinone oxidoreductase subunit A11B, Ndufa11b, ZINC FINGER                                                                                                                                                                                                                                                                                                                                                                                                                                                                                                                                                                                                |
| NDUFA12                                         | 2410011G03Rik, AW112974, B17.2, CI-B17.2, DAP13, MC1DN23, NADH-ubiquinone oxidoreductase b17.2, NADH:ubiquinone oxidoreductase subunit A12, RGD1311462                                                                                                                                                                                                                                                                                                                                                                                                                                                                                                                                                                                                                                              |
| NDUFA13                                         | 2700054G14Rik, AU022060, B16.6, CDA01, CDA016, CGI-39, CI-B16.6, GRIM-, GRIM-19, MC1DN28, NADH:ubiquinone oxidoreductase subunit A13, NADH:ubiquinone oxidoreductase subunit A13, pseudogene 1, Ndufa13-ps, Ndufa13-ps1, RGD1565358                                                                                                                                                                                                                                                                                                                                                                                                                                                                                                                                                                 |
| NDUFA2                                          | AV000592, B8, C1-B8, CD14, CI-B8, Complex I-B8, MC1DN13, NADH dehydrogenase(ubiquinone) 1 alpha subcomplex 7, NADH dehydrogenase(ubiquinone) 1 subcomplex 2, NADH dehydrogenase(ubiquinone) 1 alpha subcomplex 7, NADH:ubiquinone oxidoreductase subunit A2                                                                                                                                                                                                                                                                                                                                                                                                                                                                                                                                         |
| NDUFA3                                          | 1010001M12Rik, 1700022J01Rik, AC012314.1, AC012314.11, AC012314.13, AC012314.16, AC012314.18, AC012314.5, AC012314.8, AC012314.9, B9, CI-B9, LOC683547, LOC684509, NADH:ubiquinone oxidoreductase subunit A3, similar to NADH-ubiquinone oxidoreductase B9 subunit (Complex I-B9) (CI-B9)                                                                                                                                                                                                                                                                                                                                                                                                                                                                                                           |
| NDUFA4                                          | CI-9k, CI-MLRQ, Complex I-MLRQ, COXFA4, LOC679503, LOC681024, MC4DN21, ML, MLRQ, NADH dehydrogenase (ubiquinone) 1 alpha subcomplex 4, NADH dehydrogenase (ubiquinone) 1 alpha subcomplex 4, NDUAA, NDUFA4 mitochondrial complex associated, NDUFA4, mitochondrial complex associated                                                                                                                                                                                                                                                                                                                                                                                                                                                                                                               |
| NDUFA4L2                                        | BC064011, COXFA4L2, LOC56901, NDUFA4 mitochondrial complex associated like 2, NDUFA4, mitochondrial complex associated like 2, NUOMS                                                                                                                                                                                                                                                                                                                                                                                                                                                                                                                                                                                                                                                                |
| NDUFA5                                          | 2900002J19Rik, B13, CI-13k, CI-13KD-B, Complex I 13 kda subunit, NADH:ubiquinone oxidoreductase subunit A5, NADHUO, NUFM, UQOR13                                                                                                                                                                                                                                                                                                                                                                                                                                                                                                                                                                                                                                                                    |
| NDUFA6                                          | 2700038D15Rik, B14, B230217P19Rik, CI-B14, LYRM6, MC1DN33, NADHB14, NADH DEHYDROGENASE 1 alpha, NADH DEHYDROGENASE 1 alpha, NADH:ubiquinone oxidoreductase subunit A6                                                                                                                                                                                                                                                                                                                                                                                                                                                                                                                                                                                                                               |
| NDUFA7                                          | 14.5kD, 14.5kDa, 2400007M02Rik, B14.5a, CI-B14.5a, NADH:ubiquinone oxidoreductase subunit A7                                                                                                                                                                                                                                                                                                                                                                                                                                                                                                                                                                                                                                                                                                        |
| NDUFA8                                          | 0610033L03Rik, Aa2-258, AW261656, CI-19KD, CI-PGIV, Complex I-19KD, Complex I-PGIV, NADH:ubiquinone oxidoreductase subunit A8, PGIV                                                                                                                                                                                                                                                                                                                                                                                                                                                                                                                                                                                                                                                                 |
| NDUFA9                                          | 1010001N11Rik, 39 Kda, ci, CC6, CI-39k, Complex I-39KD, COQ11, MC1DN26, NADH-ubiquinone oxidoreductase 39-kda subunit, NADH:ubiquinone oxidoreductase subunit A9, NADH UBIQUINONE OXYDOREDUCTASE, ND39, NDUFS2L, SDR22E1                                                                                                                                                                                                                                                                                                                                                                                                                                                                                                                                                                            |
| NDUFAB1                                         | 2210401F17Rik, 2310039H15Rik, 2610003B19Rik, 9130423F15Rik, ACP, ACP1, CI-SDAP, FASN2A, Gm17257, NADH:ubiquinone oxidoreductase subunit AB1, NADH:ubiquinone oxidoreductase subunit AB1b, Ndufab1-ps, SDAP                                                                                                                                                                                                                                                                                                                                                                                                                                                                                                                                                                                          |
| NDUFAF1                                         | 2410001M24Rik, CGI-6, CGI-65, CIA, CIA30, MC1DN11, NADH:ubiquinone oxidoreductase complex assembly factor 1                                                                                                                                                                                                                                                                                                                                                                                                                                                                                                                                                                                                                                                                                         |
| NDUFB1                                          | AC121965.1, CI-MNLL, CI-SGDH, Gm2695, LOC100046667, MNLL, NADH:ubiquinone oxidoreductase subunit B1, Ndufb1-ps                                                                                                                                                                                                                                                                                                                                                                                                                                                                                                                                                                                                                                                                                      |
| NDUFB10                                         | 0610011B04Rik, Complex I-PDSW, LOC681867, MC1DN35, NADH:ubiquinone oxidoreductase subunit B10, PDSW                                                                                                                                                                                                                                                                                                                                                                                                                                                                                                                                                                                                                                                                                                 |
| NDUFB11                                         | CI-E5SS, D5Bwg0566e, D5Bwg0577e, E5SS, MC1DN30, NADH:ubiquinone oxidoreductase subunit B11, Neuronal protein 15.6, Np, Np15, NP15.6, NP17.3, p15.6, P17.3, RGD1563698                                                                                                                                                                                                                                                                                                                                                                                                                                                                                                                                                                                                                               |
| NDUFB2                                          | 1810011O01Rik, AGGG, AI325567, CI-AGGG, LOC100503140, NADH:ubiquinone oxidoreductase subunit B2                                                                                                                                                                                                                                                                                                                                                                                                                                                                                                                                                                                                                                                                                                     |
| NDUFB3                                          | 2700033F16Rik, B12, CI-B12, MC1DN25, NADH:ubiquinone oxidoreductase subunit B3                                                                                                                                                                                                                                                                                                                                                                                                                                                                                                                                                                                                                                                                                                                      |
| NDUFB4                                          | 0610006N12Rik, 1300010H20Rik, B15, CI-B15, Complex I-B15, Gm3244, Gm3873, LOC100361934, LOC687888, LOC691675, LOC727762, NADH dehydrogenase (ubiquinone) 1 beta subcomplex 4, NADH dehydrogenase (ubiquinone) 1 beta subcomplex, 4-like 1, pseudogene 1, NADH dehydrogenase (ubiquinone) 1 beta subcomplex 4, NADH dehydrogenase (ubiquinone) 1 beta subcomplex, 4-like 1, pseudogene 1, NADH:ubiquinone oxidoreductase subunit B4, NADH:ubiquinone oxidoreductase subunit B4B, NADH:ubiquinone oxidoreductase subunit B4C, Ndufb4b, Ndufb4c, Ndufb4l1, Ndufb4l1-ps1, RGD1560088, RGD1560413, similar to NADH dehydrogenase (ubiquinone) 1 beta subcomplex, 4, 15kDa, similar to NADH dehydrogenase (ubiquinone) 1 beta subcomplex, 4, 15kDa, similar to NADH:ubiquinone oxidoreductase B15 subunit |
| NDUFB5                                          | 0610007D05Rik, AU015782, CI-SGDH, Complex I-SGDH, NADH, NADH:ubiquinone oxidoreductase subunit B5, Ndufb5, SGDh                                                                                                                                                                                                                                                                                                                                                                                                                                                                                                                                                                                                                                                                                     |
| NDUFB6                                          | 17 Kda, ci, B17, CI, CI-B17, DD6C4-3, DD6C4-4, Gm137, NADH UBIQUINONE OXDOREDUCTASE B17, NADH:ubiquinone oxidoreductase subunit B6                                                                                                                                                                                                                                                                                                                                                                                                                                                                                                                                                                                                                                                                  |
| NDUFB7                                          | 1110002H15Rik, B18, CI-B18, NADH DEHYDROGENASE (UBIQUINONE) 1 beta SUBCOMPLEX, 7, 18KDA, NADH DEHYDROGENASE (UBIQUINONE) 1 beta SUBCOMPLEX, 7, 18KDA, NADH:ubiquinone oxidoreductase subunit B7                                                                                                                                                                                                                                                                                                                                                                                                                                                                                                                                                                                                     |
| NDUFB8                                          | 2900010I05Rik, AI987932, ASHl, CI-ASHl, Complex-I Ubiquinone Oxidoreductase Subunit Ashl, MC1DN32, NADH:ubiquinone oxidoreductase subunit B8                                                                                                                                                                                                                                                                                                                                                                                                                                                                                                                                                                                                                                                        |
| NDUFB9                                          | 1190008J14Rik, B22, CI-B22, Complex I-B22, LYRM3, MC1DN24, NADH Dehydrogenase (Ubiquinone) 1 Beta B22 Subunit, NADH Dehydrogenase (Ubiquinone) 1 beta B22 Subunit, NADH-Q Oxidoreductase B22, NADH Ubiquinone Oxidoreductase B22 Subunit, NADH:ubiquinone oxidoreductase subunit B9, NDUb9, UQOR22                                                                                                                                                                                                                                                                                                                                                                                                                                                                                                  |
| NDUFS1                                          | 5830412M15Rik, 9930026A05Rik, CI-75k, CI-75KD, MC1DN5, MITOCHONDRIAL COMPLEX I 75-KDA subunit, NADH-coenzyme Q reductase, NADH dehydrogenase precursor, 75kDa subunit, NADH Ubiquinone Oxidoreductase 75 Kda Subunit, NADH-ubiquinone oxidoreductase 75 kDa subunit, mitochondrial, NADH:ubiquinone oxidoreductase core subunit S1, PRO1304                                                                                                                                                                                                                                                                                                                                                                                                                                                         |
| NDUFS2                                          | CI-49, CI-49kD, Complex I-49KD, MC1DN6, NADH-coenzyme q reductase, NADH Ubiquinone Oxidoreductase 49 Kda Subunit, NADH:ubiquinone oxidoreductase core subunit S2                                                                                                                                                                                                                                                                                                                                                                                                                                                                                                                                                                                                                                    |
| NDUFS3                                          | 0610010M09Rik, 30 Kda, ci, CI-30, CI-30kD, MC1DN8, NADH Dehydrogenase 30kDa, NADH:ubiquinone oxidoreductase core subunit S3, NADH-UBIQUINONE REDUCTASE                                                                                                                                                                                                                                                                                                                                                                                                                                                                                                                                                                                                                                              |
| NDUFS4                                          | 18 kda subunit of complex I, 6720411N02Rik, AQDQ, C1-18k, CI-18, CI-18 kDa, CI-AQDQ, Complex I-18 kDa, MC1DN1, NADH:ubiquinone oxidoreductase core subunit S4, NADH:ubiquinone oxidoreductase subunit S4                                                                                                                                                                                                                                                                                                                                                                                                                                                                                                                                                                                            |
| NDUFS5                                          | AA407369, AI256693, CI-15k, NADH:ubiquinone oxidoreductase subunit S5, Ndufs5b                                                                                                                                                                                                                                                                                                                                                                                                                                                                                                                                                                                                                                                                                                                      |
| NDUFS6                                          | BC059730, CI-13kA, CI-13kD-A, EG623286, Gm6415, IP, IP13, Ip13dis, LOC100912599, LOC679739, MC1DN9, NADH dehydrogenase (ubiquinone) Fe-S protein 6, NADH dehydrogenase [ubiquinone] iron-sulfur protein 6, mitochondrial-like, NADH dehydrogenase [ubiquinone] iron-sulphur protein 6, mitochondrial-like, NADH ubiquinone oxidoreductase 13 kda a subunit, NADH:ubiquinone oxidoreductase core subunit S6, NADH:ubiquinone oxidoreductase subunit S6, NADH:ubiquinone oxidoreductase subunit S6B, Ndufb13, Ndufs6b, RAT1p13dis                                                                                                                                                                                                                                                                     |
| NDUFS7                                          | 1010001M04Rik, CI-20, CI-20KD, MC1DN3, MY017, NADH-coenzyme Q reductase, NADH:ubiquinone oxidoreductase core subunit S7, PSST                                                                                                                                                                                                                                                                                                                                                                                                                                                                                                                                                                                                                                                                       |
| NDUFS8                                          | BC021616, CI-23k, CI-23KD, MC1DN2, NADH dehydrogenase (ubiquinone) Fe-S protein 8, NADH:ubiquinone oxidoreductase core subunit S8, TYKY                                                                                                                                                                                                                                                                                                                                                                                                                                                                                                                                                                                                                                                             |
| NDUFV1                                          | CI-51K, CI-51KD, MC1DN4, MITOCHONDRIAL COMPLEX I-51KDA subunit, NADH DEHYDROGENASE 51KD, NADH:ubiquinone oxidoreductase core subunit V1, UQOR1                                                                                                                                                                                                                                                                                                                                                                                                                                                                                                                                                                                                                                                      |
| NDUFV2                                          | 24KDA subunit-MITOCHONDRIAL COMPLEX 1, 2900010C23Rik, CI-24k, MC1DN7, NADH Dehydrogenase (Ubiquinone) Flavoprotein 2, NADH:ubiquinone oxidoreductase core subunit V2                                                                                                                                                                                                                                                                                                                                                                                                                                                                                                                                                                                                                                |
| NDUFV3                                          | 1500032D16Rik, CI-10k, CI-9KD, Mipp65, MITOCHONDRIAL COMPLEX I-10KDA subunit, NADH:ubiquinone oxidoreductase core subunit V3, NADH:ubiquinone oxidoreductase subunit V3, Ndufv3l                                                                                                                                                                                                                                                                                                                                                                                                                                                                                                                                                                                                                    |
| nicotinamide adenine dinucleotide phosphate O2- | 1184-16-3, [(2R,3R,4R,5R)-5-(6-aminopurin-9-yl)-3-hydroxy-4-phosphonooxoxolan-2-yl]methoxy-hydroxyphosphoryl] [(2R,3S,4R,5R)-5-(3-carbamoylpyridin-1-ium-1-yl)-3,4-dihydroxyoxolan-2-yl]methyl hydrogen phosphate, 53-59-8, adenosine 5'-(trihydrogen diphosphate), 2'-(dihydrogen phosphate), P'-5'-ester with 3-(aminocarbonyl)-1-beta-D-ribofuranosylpyridinium, inner salt, adenosine 5'-(trihydrogen diphosphate), 2'-(dihydrogen phosphate), P'-5'-ester with 3-(aminocarbonyl)-1-beta-D-ribofuranosylpyridinium, inner salt, beta-NADP, C21H29N7O17P3+, NADP, NAD(P), NAD(P)+, NADP+, NAD phosphate, beta-NADP                                                                                                                                                                               |
| OGDH                                            | 11062-77-4, O2-, oxygen peroxide, superoxide, superoxide anion, superoxide ion, superoxide radical                                                                                                                                                                                                                                                                                                                                                                                                                                                                                                                                                                                                                                                                                                  |
| OGDH                                            | 2210403E04Rik, 2210412K19Rik, AA409584, AKGDH, Alpha-ketoglutarate dehydrogenase, d1401, E1k, Kdh E1, KGD1, KGDH, LOC103693780, mKIAA4192, ODO1, OGDC, OGDH2, oxoglutarate (alpha-ketoglutarate) dehydrogenase (lipamide), oxoglutarate dehydrogenase, oxoglutarate (alpha-ketoglutarate) dehydrogenase (lipamide), alpha-ketoglutarate dehydrogenase                                                                                                                                                                                                                                                                                                                                                                                                                                               |
| Oligomycin                                      | 1404-19-9, oligomycin                                                                                                                                                                                                                                                                                                                                                                                                                                                                                                                                                                                                                                                                                                                                                                               |
| Palmitate                                       | 143-20-4, 16:0 fatty acid, 57-10-3, C16:0, C16:0-COOH, C16:0 fatty acid, C16:0 free fatty acid, c16 fatty acid, C16H32O2, cetyllic acid, hexadecanoate, hexadecanoic acid, hexadecylic acid, n-hexadecanoic acid, n-palmitic acid, palmitate, palmitate acid, sodium palmitate                                                                                                                                                                                                                                                                                                                                                                                                                                                                                                                      |
| PARK7                                           | CAP1, DJ-1, GATD2, HEL-S-67p, Parkinson disease (autosomal recessive, early onset) 7, Parkinsonism associated deglycase, SP22                                                                                                                                                                                                                                                                                                                                                                                                                                                                                                                                                                                                                                                                       |
| PDHA1                                           | E1 alpha PDH, E1 alpha PDH, PDHA, PDHAD, PDHCE1A, PDHE1a, PDHE1alpha, PDHE1a, PHE1A, Pyruvate dehydrogenase-alpha, Pyruvate dehydrogenase e1 alpha, Pyruvate dehydrogenase e1 alpha, pyruvate dehydrogenase E1 subunit alpha 1, pyruvate dehydrogenase E1 subunit alpha 1, Pyruvate dehydrogenase e1 alpha, pyruvate dehydrogenase E1 alpha 1, Pyruvate dehydrogenase-alpha                                                                                                                                                                                                                                                                                                                                                                                                                         |
| Perhexiline peroxynitrite                       | 2-(2,2-dicyclohexylethyl)piperidine, 6621-47-2, C19H35N, perhexiline maleate, perhexiline, piperidine, 2-(2,2-dicyclohexylethyl)-19059-14-4, NO3-, oxido nitrite, peroxynitrite, peroxynitride, peroxynitrite, sodium peroxynitrite                                                                                                                                                                                                                                                                                                                                                                                                                                                                                                                                                                 |
| PINK1                                           | 1190006F07Rik, AU042772, AW557854, br, BRPK, mFLJ00387, PARK6, PTEN-induced kinase, PTEN-induced kinase 1, PTEN induced putative kinase 1                                                                                                                                                                                                                                                                                                                                                                                                                                                                                                                                                                                                                                                           |
| PRDX3                                           | A, AOP-1, AW822249, D0Toh, D0Toh1, E2, E2l, HBC189, Mer, MER5, MTAP, peroxiredoxin 3, PRO1748, Prx3, PRX III, SP, SP-22, TDXM, THIOREDUCTASE DEPENDANT PEROXIDE REDUCTASE                                                                                                                                                                                                                                                                                                                                                                                                                                                                                                                                                                                                                           |
| PRDX5                                           | ACR1, AOEB1, AOEB166, AOPP, B166, HEL-S-55, P, Peroxiredoxin 5, PLP, PMP, PMP20, Prd, PRDX6, PRX5, PRXV, SBB110, THIOREDOXIN PEROXIDASE 5                                                                                                                                                                                                                                                                                                                                                                                                                                                                                                                                                                                                                                                           |
| PRKN                                            | AR-JP, LPRS2, P, Pa, Park, PARK2, Parkin, parkin RBR E3 ubiquitin protein ligase, PDJ, Pk                                                                                                                                                                                                                                                                                                                                                                                                                                                                                                                                                                                                                                                                                                           |
| PSEN1                                           | ACNINV3, AD3, Ad3h, FAD, P, presenilin 1, PS, PS-1, S18, S182                                                                                                                                                                                                                                                                                                                                                                                                                                                                                                                                                                                                                                                                                                                                       |
| PSENEN                                          | 1700023M09Rik, ACNINV2, MDS033, MSTP064, PEN-2, presenilin enhancer gamma secretase subunit, presenilin enhancer, gamma-secretase subunit, presenilin enhancer gamma secretase subunit, presenilin enhancer, gamma-secretase subunit, RGD1312037                                                                                                                                                                                                                                                                                                                                                                                                                                                                                                                                                    |
| RHOT2                                           | Arh, ARHT2, C16orf39, Mi, MIRO-2, ras homolog family member T2, RASL                                                                                                                                                                                                                                                                                                                                                                                                                                                                                                                                                                                                                                                                                                                                |
| ROS                                             | oxygen and reactive oxygen species, reactive oxygen metabolites, ROI, ROS                                                                                                                                                                                                                                                                                                                                                                                                                                                                                                                                                                                                                                                                                                                           |
| Rotenone                                        | (1)Benzopyrano(3,4-b)fuoro(2,3-h)(1)benzopyran-6(6aH)-one, 1,2,12,14-tetrahydro-8,9-dimethoxy-2-(1-methylethenyl)-, (2R)-(2alpha,6alpha,12alpha))-, (1S,6R,13S)-16,17-dimethoxy-6-prop-1-en-2-yl-2,7,20-trioxapentacyclo[11.8.0.0.11.04.8.0.14.19]henicos-3(11),4(8),9,14,16,18-hexaen-12-one, (2R,6aS,12aS)-1,2,6,6a,12,12a-hexahydro-2-isopropenyl-8,9-dimethoxychromeno(3,4-b)fuoro(2,3-h)chromen-6-one, 83-79-4, C23H22O6, rot                                                                                                                                                                                                                                                                                                                                                                  |

| Symbol                 | Synonym(s)                                                                                                                                                                                                                                                                                                                                                                                                                                                                                                                                                                                                                                                 |
|------------------------|------------------------------------------------------------------------------------------------------------------------------------------------------------------------------------------------------------------------------------------------------------------------------------------------------------------------------------------------------------------------------------------------------------------------------------------------------------------------------------------------------------------------------------------------------------------------------------------------------------------------------------------------------------|
| SDHA                   | 1500032O14RIK, 2310034D06RIK, 4921513A11, C81073, CMD1GG, Complex II Flavoprotein Subunit, Electron-transfer-flavoprotein, alpha polypeptide, Electron-transfer-flavoprotein, $\alpha$ polypeptide, F, FP, MC2DN1, PGL5, SDH, SDH1, SDH2, SDH70, SDHF, succinate dehydrogenase complex flavoprotein subunit A, Succinate dehydrogenase complex, subunit A flavoprotein (Fp), succinate dehydrogenase complex, subunit A, flavoprotein (Fp), Succinate-ubiquinone oxidoreductase 70-kda subunit                                                                                                                                                             |
| SDHB                   | 0710008N11RIK, CII-30, CII - 30 (Fe S), CWS2, Electron-transfer-flavoprotein, beta polypeptide, Electron-transfer-flavoprotein, $\beta$ polypeptide, IP, PCHC, PGL4, SDH, SDH1, SDH2, SDH30, SDHIP, succinate dehydrogenase complex iron sulfur subunit B, succinate dehydrogenase complex iron sulphur subunit B, succinate dehydrogenase complex, subunit B, iron sulfur (Ip), succinate dehydrogenase complex, subunit B, iron sulphur (Ip), Succinate Dehydrogenase Cytochrome B Subunit, Succinate Dehydrogenase Ip Cytochrome B Subunit, Succinate dehydrogenase putative iron sulfur subunit, Succinate dehydrogenase putative iron sulphur subunit |
| SDHC                   | 0610010E03RIK, A1316496, AU019277, CYB560, CYBL, PGL3, QPs-1, SDH3, succinate dehydrogenase complex subunit C, succinate dehydrogenase complex, subunit C, integral membrane protein                                                                                                                                                                                                                                                                                                                                                                                                                                                                       |
| SDHD                   | 3110001M13RIK, AVLL5809, C78570, CBT1, CII-4, CWS3, cybS, MC2DN3, PGL, PGL1, PRO19626, QPs3, SDH4, SDHD1, succinate dehydrogenase complex subunit D, succinate dehydrogenase complex, subunit D, integral membrane protein                                                                                                                                                                                                                                                                                                                                                                                                                                 |
| SNCA                   | AD AMYLOID, al, alp, alphaSYN, alpha SYNUCLEIN, ASYN, NACP, PARK1, PARK4, PD1, synuclein alpha, synuclein, alpha, Synuclein- $\alpha$ , synuclein, $\alpha$ , $\alpha$ -Syn, $\alpha$ SYNUCLEIN                                                                                                                                                                                                                                                                                                                                                                                                                                                            |
| SOD2                   | GCInc1, IMAGE:4711494, IPO-B, MANGANESE DEPENDENT SOD, Manganese Superoxide Dismutase, Manganese Superoxide Dismutase 2, MGC5618, MITOCHONDRIAL SOD, Mn, MNSOD, Mn superoxide dismutase, mtSOD, MVCD6, Sod, Superoxide dismutase, superoxide dismutase 2, superoxide dismutase 2, mitochondrial                                                                                                                                                                                                                                                                                                                                                            |
| Succinatedehydrogenase | 1.3.99.1, Complex II, fumarate reductase, fumaric hydrogenase, Oxphos Complex II, succinate:(acceptor) oxidoreductase, Succinate INT Dehydrogenase, succinate oxidoreductase, succinic acid dehydrogenase, succinic dehydrogenase, succinodhydrogenase, succinyl dehydrogenase, SUO                                                                                                                                                                                                                                                                                                                                                                        |
| TRAK1                  | 2310001H13RIK, A1413908, A1467545, DEE68, EIEE68, hyr, hyrt, KIAA1042, MILT1, mKIAA1042, OIP106, RGD1307844, trafficking kinesin protein 1, trafficking protein, kinesin binding 1                                                                                                                                                                                                                                                                                                                                                                                                                                                                         |
| TXN2                   | 2510006J11RIK, A1788873, COXPD29, MTRX, MT-TRX, thioredoxin 2, Trx, TRX2, TXN                                                                                                                                                                                                                                                                                                                                                                                                                                                                                                                                                                              |
| TXNRD2                 | AA118373, ESTM57301, ESTM573010, GCCD5, SELZ, TG, TGR, thioredoxin reductase 2, TR, TR3, TR-BETA, TRXR2, Trxrd2, TR- $\beta$                                                                                                                                                                                                                                                                                                                                                                                                                                                                                                                               |
| UCP2                   | BMIQ4, SLC25A8, UCPH, uncoupling protein 2, Uncoupling protein 2, mitochondrial, uncoupling protein 2 (mitochondrial, proton carrier)                                                                                                                                                                                                                                                                                                                                                                                                                                                                                                                      |
| UQCR10                 | 1110020P15RIK, AA960494, HSPC051, HSPC119, HSPC151, LOC683838, LOC685322, QCR9, Ubiquinol Cytochrome C Reductase 7.2 kd, ubiquinol-cytochrome c reductase, complex III subunit X, UCCR7.2, UCR6                                                                                                                                                                                                                                                                                                                                                                                                                                                            |
| UQCR11                 | 0710008D09RIK, AL022707, LOC686951, QCR10, Ubiquinol cytochrome c reductase 6.4kd, ubiquinol-cytochrome c reductase, complex III subunit XI, Uqc, UQCR                                                                                                                                                                                                                                                                                                                                                                                                                                                                                                     |
| UQCRB                  | 2210415M14RIK, MC3DN3, QCR7, QP-, QP-C, ubiquinol-cytochrome c reductase binding protein, UQBC, UQBP, UQCR6, Uqcrbl, UQPC                                                                                                                                                                                                                                                                                                                                                                                                                                                                                                                                  |
| UQCRC1                 | 1110032G10RIK, COR1, D3S3191, QCR1, Ubiquinol cytochrome c reductase 1, Ubiquinol Cytochrome C Reductase Core 1, ubiquinol-cytochrome c reductase core protein 1, UQCR1                                                                                                                                                                                                                                                                                                                                                                                                                                                                                    |
| UQCRC2                 | 1500004O06RIK, AURA11, Core 2, CORE protein 2 of COMPLEX III, Cytochrome b-c1 complex subunit 2, MC3DN5, MGC94368, Mitochondrial Core Protein2, QCR2, Rikubiquinol Cytochrome C Reductase Core Protein 2, ubiquinol-cytochrome c reductase core protein 2, Ubiquinol Cytochrome C Reductase Core Protein 2 Precursor, UQCR2                                                                                                                                                                                                                                                                                                                                |
| UQCRRFS1               | 4430402G14RIK, A1875505, Complex III FeS, Fes subunit of complex iii, ISP, LRRGT00195, MC3DN10, Rieske, RIP1, RIS1, RISP, UBIQUINOL CYTOCHROME C REDUCTASE, ubiquinol-cytochrome c reductase, Rieske iron-sulfur polypeptide 1, ubiquinol-cytochrome c reductase, Rieske iron-sulphur polypeptide 1, UQCR5                                                                                                                                                                                                                                                                                                                                                 |
| UQCRH                  | 2210416J04RIK, 2310021J10RIK, 2610041P16RIK, Gm9763, LOC100046686, QCR6, ubiquinol-cytochrome c reductase hinge protein, ubiquinol-cytochrome c reductase hinge protein, pseudogene 1, UQCR8, Uqcrh-ps1                                                                                                                                                                                                                                                                                                                                                                                                                                                    |
| XDH                    | X, XAN1, Xanthine Dehydrogenase, Xanthine Oxidase, XO, XOR, Xox-, Xox-1                                                                                                                                                                                                                                                                                                                                                                                                                                                                                                                                                                                    |

## Pathway Analysis Using IPA Software; canonical pathway

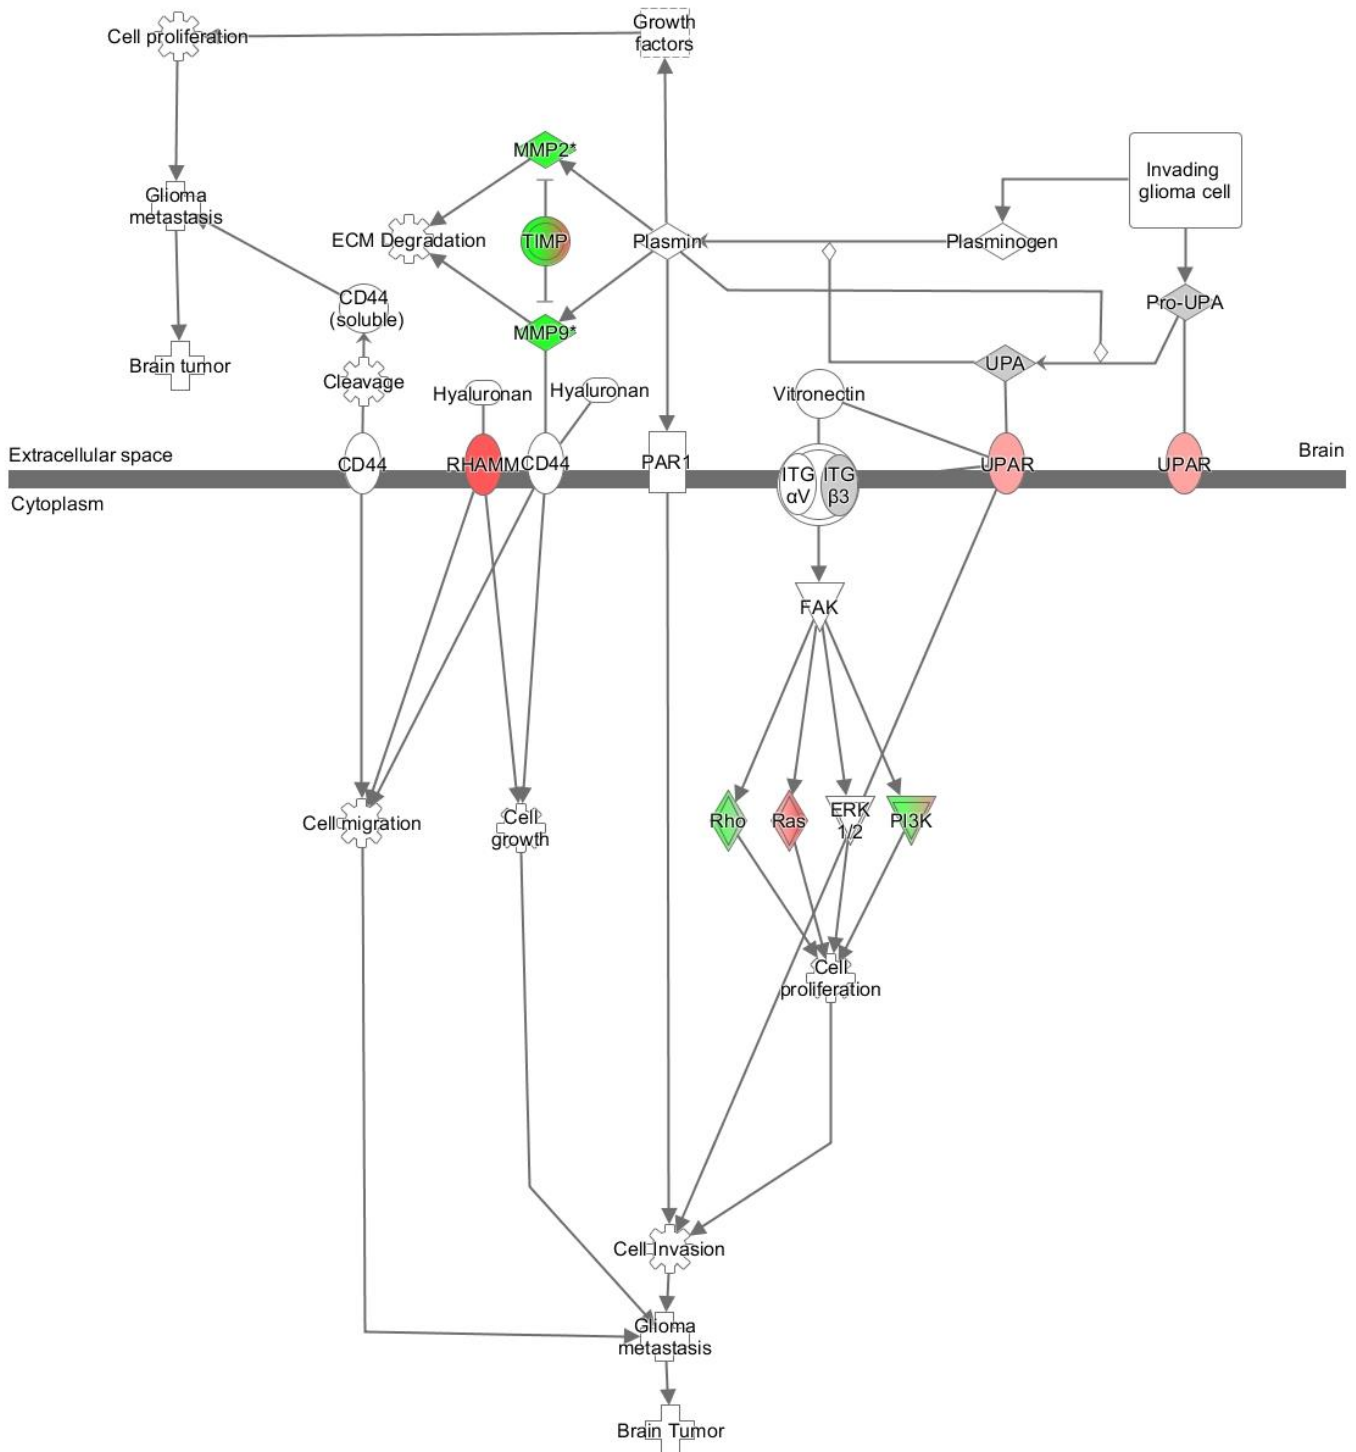

Figure S54. Glioma Invasiveness Signaling at 24 h

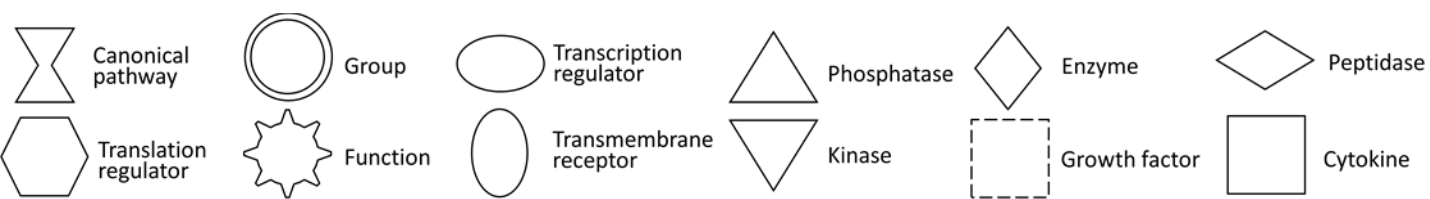

Red: Increased, FDR<0.05 versus solvent control

Green: Decreased, FDR<0.05 versus solvent control

| Symbol                  | Synonym(s)                                                                                                                                                                                                                                                                                                                                                                                                                                                                                                                                                                                                                                   |
|-------------------------|----------------------------------------------------------------------------------------------------------------------------------------------------------------------------------------------------------------------------------------------------------------------------------------------------------------------------------------------------------------------------------------------------------------------------------------------------------------------------------------------------------------------------------------------------------------------------------------------------------------------------------------------|
| CD44                    | 216062 AT, AU023126, AW121933, AW146109, CD44A, CD44 Antigen, CD44 (containing exon 5), Cd44i, CD44 molecule (Indian blood group), CD44 (soluble), CD44 STANDARD FROM, CDW44, CSPG8, ECMR-III, Epican, HCELL, HERM, HERMES, Hermes antigen, HUTCH-I, IN, LHR, Ly-2, Ly-24, MC56, MDU2, MDU3, META4, MIC4, NKT.44, Pgp, Pgp-1, RHAMM                                                                                                                                                                                                                                                                                                          |
| ERK1/2                  | MAPK p44/42, MAPK p44/p42, p42/44 mapk, P42/p44 erk, P42/p44 mapk, p42/p44 MAP KINASE                                                                                                                                                                                                                                                                                                                                                                                                                                                                                                                                                        |
| F2R                     | A1482343, CF2, CF2R, coagulation factor II (thrombin) receptor, coagulation factor II thrombin receptor, HTR, P, PAR-1, Th, ThrR, TR, TRGPC, $\alpha$ Thrombin Receptor                                                                                                                                                                                                                                                                                                                                                                                                                                                                      |
| HMMR                    | AA386826, CD168, hyaluronan-mediated motility receptor, hyaluronan mediated motility receptor (RHAMM), IHABP, Rha, RHAMM                                                                                                                                                                                                                                                                                                                                                                                                                                                                                                                     |
| Hyaluronan              | 34448-35-6, 9004-61-9, 9067-32-7, Amvisc, Amvisc Plus, Biolon, C28H44N2NaO23+, Duovisc, etamucine, EUFLEXA, HA, Healon, Healon5, Hyalgan, hyaluronan, hyaluronan acid, hyaluronate, hyaluronate sodium, hyaluronic acid oligosaccharide, hyaluronic acid, sodium salt, Hyruan Plus, Hyvisc, luronit, Orthovisc, Provisc, sodium;(2S,3S,4S,5R,6R)-6-[(2S,3R,4R,5S,6R)-3-acetamido-2-[(2S,3S,4R,5R,6R)-6-[(2R,3R,4R,5S,6R)-3-acetamido-2,5-dihydroxy-6-(hydroxymethyl)oxan-4-yl]oxy-2-carboxy-4,5-dihydroxyoxan-3-yl]oxy-5-hydroxy-6-(hydroxymethyl)oxan-4-yl]oxy-3,4,5-trihydroxyoxane-2-carboxylic acid, sodium hyaluronate, Viscoat, Vitrax |
| Integrin alpha-V beta 3 | alpha-v beta-3, alpha V beta 3 Integrin, Integrin-alpha-beta3, Integrin- $\alpha$ -beta3, Integrin $\alpha$ V beta3, Integrin $\alpha$ V $\beta$ 3, Vitronectin Receptor, VnR, $\alpha$ -5-beta3, $\alpha$ 5 $\beta$ 3, $\alpha$ -v $\beta$ -3, $\alpha$ V $\beta$ 3 Integrin                                                                                                                                                                                                                                                                                                                                                                |
| ITGAV                   | 1110004F14RIK, 2610028E01Rik, alpha V, CD51, D430040G12RIK, integrin alpha V, integrin subunit alpha V, integrin subunit $\alpha$ V, Integrin $\alpha$ V, MSK8, VNRA, VTNR, $\alpha$ V                                                                                                                                                                                                                                                                                                                                                                                                                                                       |
| ITGB3                   | BDPLT16, BDPLT2, beta 3, CD61, GP3A, GPIIIa, GT, HPA-4, INGRB3, integrin beta 3, integrin subunit beta 3, integrin subunit $\beta$ 3, Integrin- $\beta$ 3, $\beta$ 3                                                                                                                                                                                                                                                                                                                                                                                                                                                                         |
| MMP2                    | C1g, CLG4, CLG4A, Ge, Gela, GELATINASE, Gelatinase A, matrix metalloproteinase 2, METALLOPROTEINASE 2, MMP-, MMP-II, MONA, TBE-1                                                                                                                                                                                                                                                                                                                                                                                                                                                                                                             |
| MMP9                    | AW743869, B/MMP, B/MMP9, C1g4, CLG4B, COLLAGENASE type IV, Gelatinase B, GELB, GI 92-kda, MANDP2, matrix metalloproteinase 9, METALLOPROTEINASE 9, MMP-, pro-MMP-9                                                                                                                                                                                                                                                                                                                                                                                                                                                                           |
| PI3K                    | 1-phosphatidylinositol 3-kinase, 2.7.1.137, ATP:1-phosphatidyl-1D-myo-inositol 3-phosphotransferase, Phosphatidylinositol 3 kinase, phosphatidylinositol 3'-kinase, PI3-kinase, PtdIns 3 Kinase, type III phosphoinositide 3-kinase, type I phosphatidylinositol kinase, Vps34p                                                                                                                                                                                                                                                                                                                                                              |
| PLAU                    | ATF, BDPLT5, plasminogen activator, urokinase, Pro-UPA, QPD, u-, UPA, uPA 50 kd form, UPA-H, UPAM, URK                                                                                                                                                                                                                                                                                                                                                                                                                                                                                                                                       |
| PLAUR                   | CD87, Par, plasminogen activator, urokinase receptor, Plaur3, u-, U-PAR, uPAR-2, UPAR-3, Urinary plasminogen activator receptor 2, URKR, UROKINASE R, Urokinase-type plasminogen activator receptor                                                                                                                                                                                                                                                                                                                                                                                                                                          |
| PLG                     | Ab1-346, A1649309, GLU-PG, LPA, P, Pg, PG2, plasminogen, Scdp                                                                                                                                                                                                                                                                                                                                                                                                                                                                                                                                                                                |
| PTK2                    | FA, Fad, FADK, FADK 1, FAK, FAK1, FAK related non-kinase, FR, p125FAK, pp125FAK, PPP1R71, protein tyrosine kinase 2, PTK2 protein tyrosine kinase 2, TYROSINE KINASE 2                                                                                                                                                                                                                                                                                                                                                                                                                                                                       |
| Rho                     | GTPase Rho, Rho, Rho Family, RHO-GTPASE, Rho-like Gtpase                                                                                                                                                                                                                                                                                                                                                                                                                                                                                                                                                                                     |
| VTN                     | Aa1018, A1256434, V75, vitronectin, VN, VNT                                                                                                                                                                                                                                                                                                                                                                                                                                                                                                                                                                                                  |

# Pathway Analysis Using IPA Software; canonical pathway

24 h

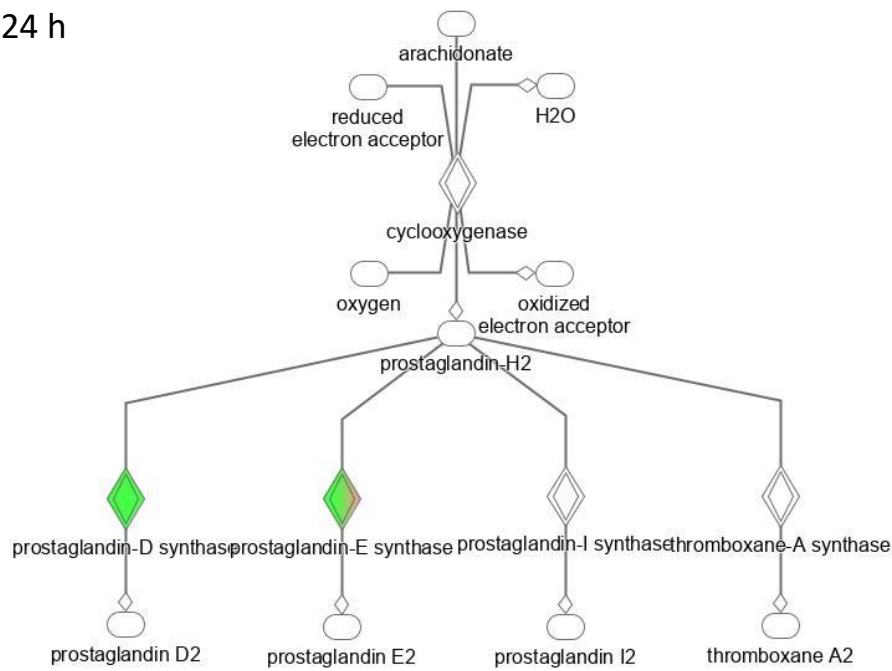

8 days

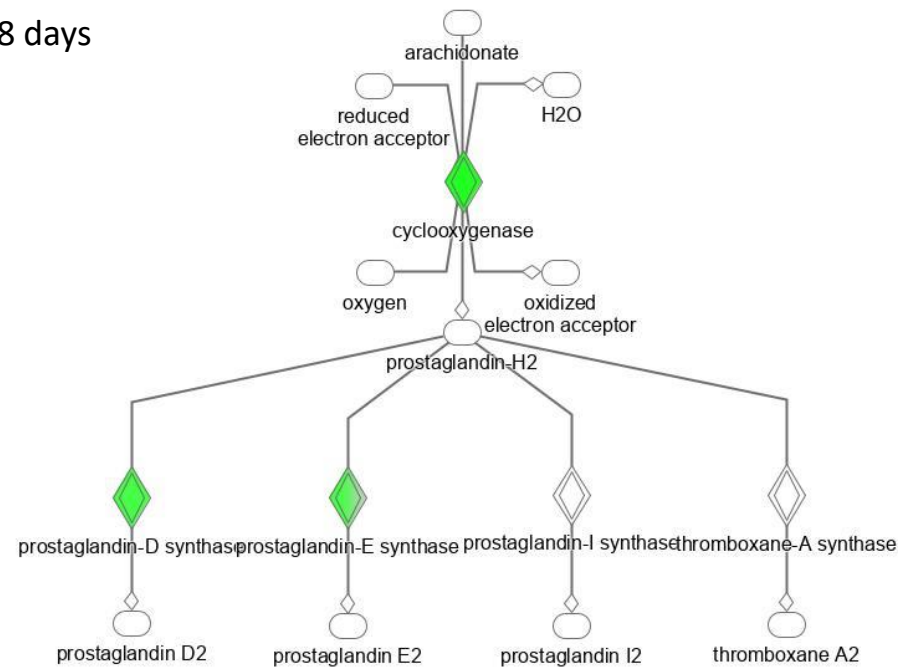

Figure S55. Prostanoid Biosynthesis at 24 h and 8 days

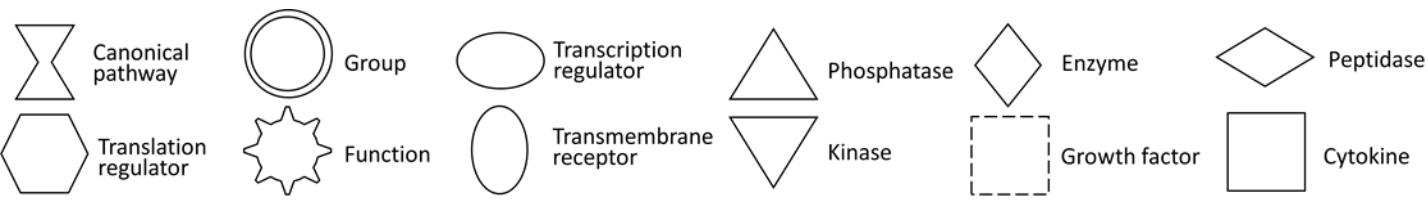

Red: Increased, FDR<0.05 versus solvent control

Green: Decreased, FDR<0.05 versus solvent control

| Symbol                   | Synonym(s)                                                                                                                                                                                                                                                                                                                                                                                                                                                      |
|--------------------------|-----------------------------------------------------------------------------------------------------------------------------------------------------------------------------------------------------------------------------------------------------------------------------------------------------------------------------------------------------------------------------------------------------------------------------------------------------------------|
| arachidonate             | 20:4n-6, 506-32-1, 5,8,11,14-eicosatetraenoic acid, (all-Z)-, 5Z,8Z,11Z,14Z-arachidonic acid, (5Z,8Z,11Z,14Z)-icosa-5,8,11,14-tetraenoic acid, AA, AA-d8, ARA, arachidonate, C20:4(n-6), C20:4w6, C20H32O2, eicosa-5Z,8Z,11Z,14Z-tetraenoic acid, sodium arachidonate                                                                                                                                                                                           |
| cyclooxygenase           | 1.14.99.1, (5Z,8Z,11Z,14Z)-icosa-5,8,11,14-tetraenoate,hydrogen-donor:oxygen oxidoreductase, COX, COX1/2, fatty acid cyclooxygenase, PGHS, (PG)H synthase, PG synthetase, Prostaglandin-endoperoxide synthase, prostaglandin endoperoxide synthetase, prostaglandin G/H synthase, prostaglandin G/H synthase and cyclooxygenase, Prostaglandin h synthase, Prostaglandin Peroxidase, prostaglandin synthase, prostaglandin synthetase, PTGS, PTGS1/2            |
| prostaglandin D2         | 11-dehydroprostaglandin F2-alpha, 11-dehydroprostaglandin F2-α, 41598-07-6, (5Z,13E)-9alpha-hydroxy-11,15-dioxoprost-5,13-dienoate, (5Z,13E)-9alpha-hydroxy-11,15-dioxoprost-5,13-dienoic acid, C20H32O5, PGD2, prost-5,13-dien-1-oic acid, 9,15-dihydroxy-11-oxo-, (5Z,9-alpha,13E,15S)-, prost-5,13-dien-1-oic acid, 9,15-dihydroxy-11-oxo-, (5Z,9-α,13E,15S)-, (Z)-7-[(1R,2R,5S)-5-hydroxy-2-[(E,3S)-3-hydroxyoct-1-enyl]-3-oxocyclopentyl]hept-5-enoic acid |
| prostaglandin E2         | 363-24-6, (5Z,11a,13E,15S)-11,15-Dihydroxy-9-oxo-prosta-5,13-dien-1-oic acid, C20H32O5, Cervidil, dinoprostone, PGE2, Prepidil, Propess, Prostarmon E, Prostin E, Prostin E2, Prostin E2 Vaginal Suppository, (Z)-7-[(1R,2R,3R)-3-hydroxy-2-[(E,3S)-3-hydroxyoct-1-enyl]-5-oxocyclopentyl]hept-5-enoic acid                                                                                                                                                     |
| prostaglandin I2         | 35121-78-9, (5Z)-5-[(3aR,4R,5R,6aS)-5-hydroxy-4-[(E,3S)-3-hydroxyoct-1-enyl]-3,3a,4,5,6,6a-hexahydrocyclopenta[b]furan-2-ylidene]pentanoic acid, 61849-14-7, C20H32O5, epoprostenol sodium, Flolan, PGI2, PGX, prost-5,13-dien-1-oic acid, 6,9-epoxy-11,15-dihydroxy-, (5Z,9alpha,11alpha,13E,15S)-, prostacyclin, prostaglandin I, prostaglandin I2, sodium PGI2                                                                                               |
| prostaglandin-D synthase | (5,13)-(15S)-9alpha,11alpha-epidioxo-15-hydroxyprosta-5,13-dienoate D-isomerase, 5.3.99.2, PGH-PGD isomerase, prostaglandin-H2 D-isomerase, prostaglandin-R-prostaglandin D isomerase                                                                                                                                                                                                                                                                           |
| prostaglandin-E synthase | 5.3.99.3, (5Z,13E)-(15S)-9alpha,11alpha-epidioxo-15-hydroxyprosta-5,13-dienoate E-isomerase, endoperoxide isomerase, PGE2 isomerase, PGE isomerase, PGH-PGE isomerase, prostaglandin endoperoxide E2 isomerase, prostaglandin endoperoxide E isomerase, prostaglandin-H2 E-isomerase, prostaglandin H-E isomerase, prostaglandin R-prostaglandin E isomerase                                                                                                    |
| prostaglandin-H2         | 42935-17-1, 9,11-epoxymethano-PGH2, C20H32O5, PGH2, PGH2 endoperoxide, prost-5,13-dien-1-oic acid, 9,11-epidioxo-15-hydroxy-, (5Z,9alpha,11alpha,13E,15S)-, (Z)-7-[(1R,4S,5R,6R)-6-[(E,3S)-3-hydroxyoct-1-enyl]-2,3-dioxabicyclo[2.2.1]heptan-5-yl]hept-5-enoic acid                                                                                                                                                                                            |
| prostaglandin-I synthase | 5.3.99.4, (5Z,13E)-(15S)-9alpha,11alpha-epidioxo-15-hydroxyprosta-5,13-dienoate 6-isomerase, PGI2 synthase, PGI2 synthetase, prostacycline synthetase, prostacyclin synthase, prostagladin I2 synthetase                                                                                                                                                                                                                                                        |
| thromboxane A2           | 57576-52-0, 5-heptenoic acid, 7-(3-(3-hydroxy-1-octenyl)-2,6-dioxabicyclo[3.1.1]hept-4-yl)-, (1S-(1alpha,3alpha,3R*),4beta(Z),5alpha)-, C20H32O5, thromboxa-5,13-dien-1-oic acid, 9,11-epoxy-15-hydroxy-, (5Z,9alpha,11alpha,13E,15S)-, TxA2, (Z)-7-[(1S,3R,4S,5S)-3-[(E,3S)-3-hydroxyoct-1-enyl]-2,6-dioxabicyclo[3.1.1]heptan-4-yl]hept-5-enoic acid                                                                                                          |
| thromboxane-A synthase   | 5.3.99.5, (5Z,13E)-(15S)-9alpha,11alpha-epidioxo-15-hydroxyprosta-5,13-dienoate thromboxane-A2-isomerase, thromboxane synthase                                                                                                                                                                                                                                                                                                                                  |

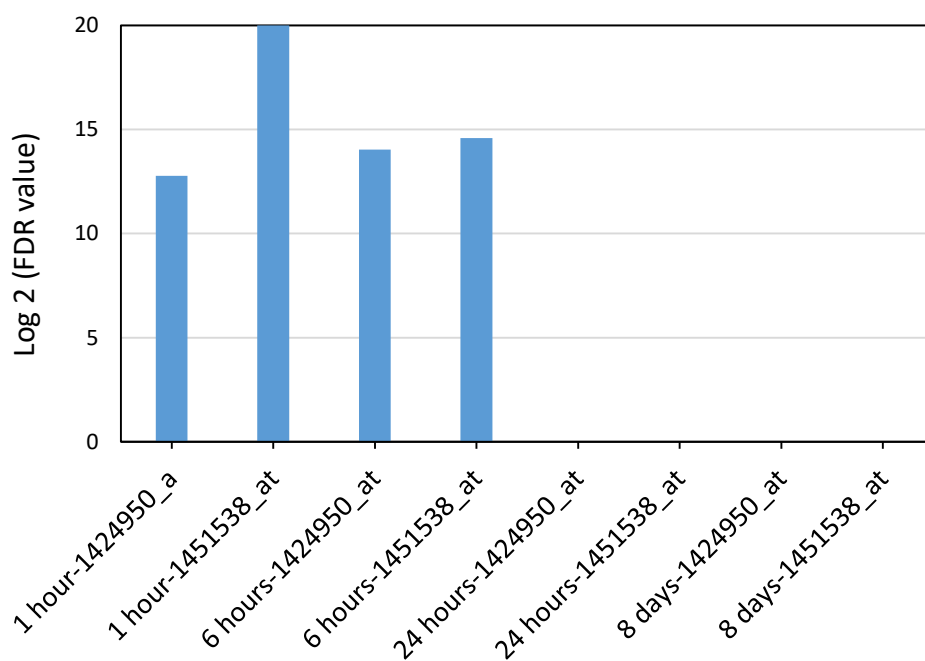

**Figure S56. SOX9 gene expression**

The FDRs that were up-regulated ( $FDR < 0.05$ ) were transformed into logarithm ( $\log_2$ ). The transformed value with FDR of 0 was entered as 20 for up-regulation.

# Pathway Analysis Using IPA Software; canonical pathway

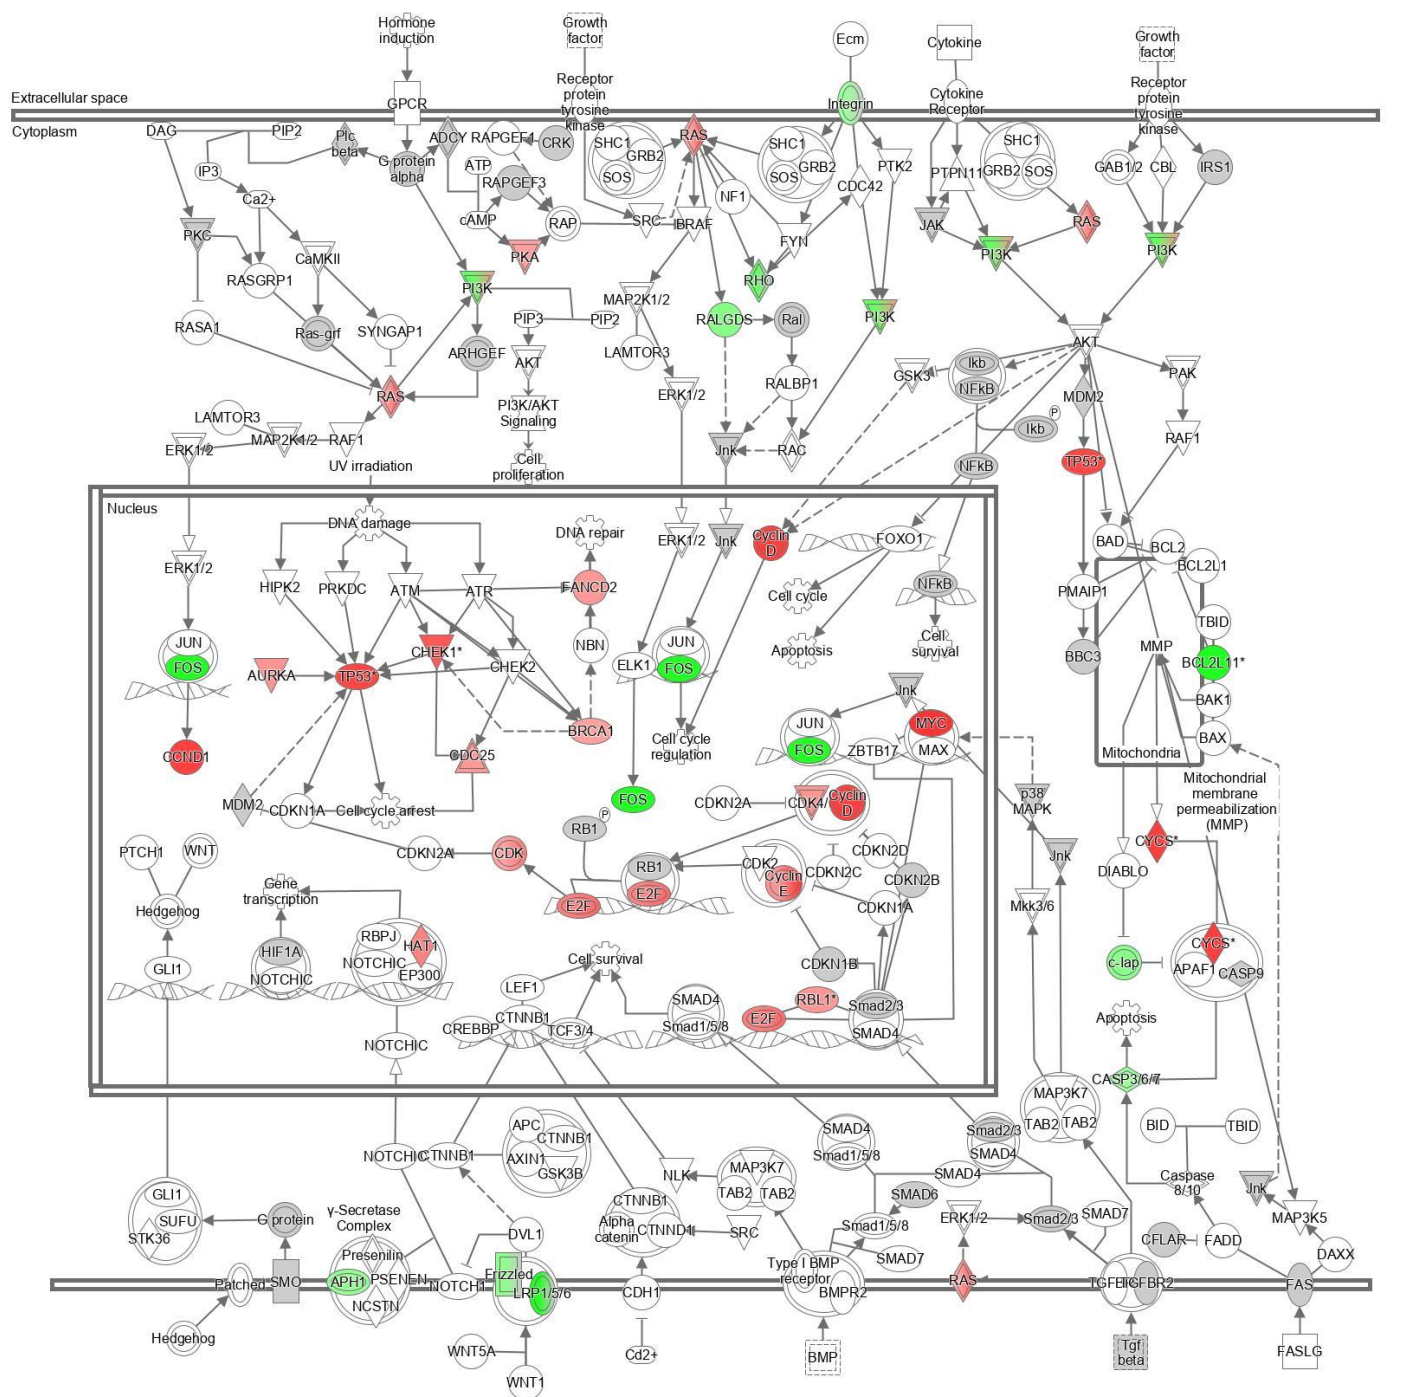

Figure S57. Molecular Mechanism of cancer at 24 h

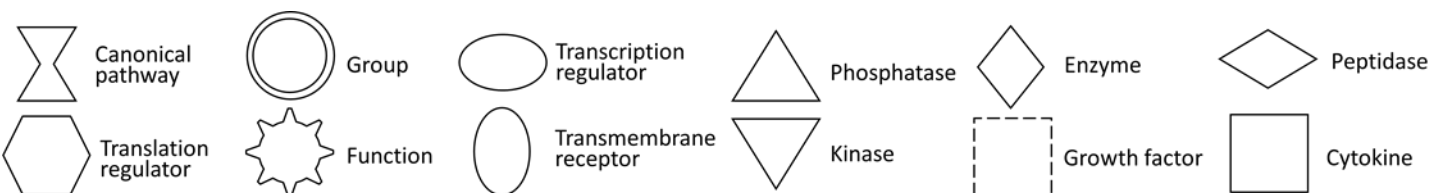

Red: Increased, FDR<0.05 versus solvent control

Green: Decreased, FDR<0.05 versus solvent control



| Symbol                                     | Synonym(s)                                                                                                                                                                                                                                                                                                                                                                                                                                                                                                                                                                                                                                                                                                                    |
|--------------------------------------------|-------------------------------------------------------------------------------------------------------------------------------------------------------------------------------------------------------------------------------------------------------------------------------------------------------------------------------------------------------------------------------------------------------------------------------------------------------------------------------------------------------------------------------------------------------------------------------------------------------------------------------------------------------------------------------------------------------------------------------|
| ADCY                                       | 3',5'-cyclic AMP synthetase, 4.6.1.1, AC, Adenylate Cyclase, Adenyl Cyclase, Adenylyl cyclase, ATP diphosphate-lyase (cyclizing), mAC, sAC                                                                                                                                                                                                                                                                                                                                                                                                                                                                                                                                                                                    |
| AKT                                        | AKT1/2/3, B/Akt, PKB, RAC-PK                                                                                                                                                                                                                                                                                                                                                                                                                                                                                                                                                                                                                                                                                                  |
| Alphacatenin                               | CTNN alpha, CTNN $\alpha$ , $\alpha$ catenin                                                                                                                                                                                                                                                                                                                                                                                                                                                                                                                                                                                                                                                                                  |
| Ap1                                        | activator protein-1, c-Jun                                                                                                                                                                                                                                                                                                                                                                                                                                                                                                                                                                                                                                                                                                    |
| APAF1                                      | D630400I06RIK, Ap, Apaf1, apoptotic peptidase activating factor 1, CED4, fog, mKIAA0413                                                                                                                                                                                                                                                                                                                                                                                                                                                                                                                                                                                                                                       |
| APC                                        | A1047805, APC1, Ap $\gamma$ , APC (PROC), APC regulator of WNT signaling pathway, APC, WNT signaling pathway regulator, AU020952, AW124434, BTPS2, CC1, DESMD, DP2, DP2.5, DP3, Familial adenomatous polyposis, GS, M, mAPC, Min, PPP1R46, RATAPC                                                                                                                                                                                                                                                                                                                                                                                                                                                                             |
| Apoptosome                                 | APAF1-Caspase 9-CytoC, apoptosis adaptor protein complex, Cytochrome C-APAF1-Caspase 9                                                                                                                                                                                                                                                                                                                                                                                                                                                                                                                                                                                                                                        |
| ARHGEF                                     | Ras GEF, RhOGEF                                                                                                                                                                                                                                                                                                                                                                                                                                                                                                                                                                                                                                                                                                               |
| ATM                                        | A1256621, AT1, ATA, ataxia telangiectasia mutated, ATC, ATD, ATDC, ATE, ATM serine/threonine kinase, C030026E19RIK, TEL1, TELO1                                                                                                                                                                                                                                                                                                                                                                                                                                                                                                                                                                                               |
| ATP                                        | [[[(2R,3S,4R,5R)-5-(6-aminopurin-9-yl)-3,4-dihydroxyoxolan-2-yl]]methoxy-hydroxyphosphoryl] phosphono hydrogen phosphate, 56-65-5, 9-beta-D-arabinofuranosyladenine 5'-triphosphate, 9-beta-D-arabinofuranosyladenine 5'-triphosphate, adenosine 5'-(tetrahydrogen triphosphate), adenosine 5'-triphosphate, ATP, ATP4-, C10H16N5O13P3                                                                                                                                                                                                                                                                                                                                                                                        |
| ATR                                        | ataxia telangiectasia and Rad3 related, Ataxia-telangiectasia-like, ATR serine/threonine kinase, FCTCS, FRP1, LOC100365674, LOC367198, LOC684113, MEC1, SCKL, SCKL1                                                                                                                                                                                                                                                                                                                                                                                                                                                                                                                                                           |
| AURKA                                      | AI, AIK, AIKR1, Ar, ARK-1, Au, AU019385, AURA, AURORA 2, AURORA A, AURORA KINASE, aurora kinase A, Aurora Related Kinase1, AW539821, Ayk, Ayk1, BTAk, I, IA, IAK, IAK1, PPP1R47, Stk, STK15, STK6, STK7                                                                                                                                                                                                                                                                                                                                                                                                                                                                                                                       |
| AXIN1                                      | AI316800, AXIN, AXIN form I, Fu, fused, Kb, Ki, kinky, knobbly, PPP1R49                                                                                                                                                                                                                                                                                                                                                                                                                                                                                                                                                                                                                                                       |
| BAD                                        | AI325008, Bad v1, Bad v2, BBC2, BCL2-associated agonist of cell death, BCL2L8                                                                                                                                                                                                                                                                                                                                                                                                                                                                                                                                                                                                                                                 |
| BAK1                                       | Ba, BAK, BAK-LIKE, BCL2-antagonist/killer 1, BCL2L7, CDN1, N-B, N-BAK1                                                                                                                                                                                                                                                                                                                                                                                                                                                                                                                                                                                                                                                        |
| BAX                                        | Bcl2-associated X, BCL2 associated X, apoptosis regulator, BCL2-associated X protein, BCL2L4                                                                                                                                                                                                                                                                                                                                                                                                                                                                                                                                                                                                                                  |
| BBG3                                       | BCL2 binding component 3, JFY-1, PU, PUMA, PUMA/JFY1                                                                                                                                                                                                                                                                                                                                                                                                                                                                                                                                                                                                                                                                          |
| BCL2                                       | AW986256, B cell leukaemia/lymphoma 2, B cell leukemia/lymphoma 2, Bcl-, Bcl2 alpha, BCL2 apoptosis regulator, BCL2, apoptosis regulator, Bcl2 $\alpha$ , C430015F12Rik, D630044D05RIK, D830018M01RIK, LOC100046608, ORF16, PPP1R50                                                                                                                                                                                                                                                                                                                                                                                                                                                                                           |
| BCL2L1                                     | bBclx1, Bcl, BCL2L BCL2-like 1, BCLX, Bcl-X beta, Bclx gamma, BCL-XL/S, Bcl-X $\beta$ , Bclx $\gamma$ , PPP1R52                                                                                                                                                                                                                                                                                                                                                                                                                                                                                                                                                                                                               |
| BCL2L11                                    | 1500006F24RIK, BAm, BCL2 like 11, BCL2-like 11 (apoptosis facilitator), Bi, BIM, Bo, BOD, BODL, LOC150819                                                                                                                                                                                                                                                                                                                                                                                                                                                                                                                                                                                                                     |
| BMP                                        | BMP3, BMP-3A, BONE MORPHOGENIC, Osteogenin                                                                                                                                                                                                                                                                                                                                                                                                                                                                                                                                                                                                                                                                                    |
| BMPR2                                      | 2610024H22RIK, AL117858, AW546137, BB189135, BM, BMP-, BMP-2, BMPR3, BMPR-II, BMR2, bone morphogenetic protein receptor type 2, bone morphogenetic protein receptor, type II (serine/threonine kinase), BRK-3, Gm20272, POVD1, PPH1, T-ALK, Type ii bmp receptor                                                                                                                                                                                                                                                                                                                                                                                                                                                              |
| BRAF                                       | 9930012E13RIK, AA120551, AA387315, AA473386, AA47469, Bra, B-RAF1, Braf-2, B-Raf proto-oncogene, serine/threonine kinase, Braf transforming gene, C230098H17, C87398, D6Etd631, D6Eitd631e, NS7, RAFB, RAFB1                                                                                                                                                                                                                                                                                                                                                                                                                                                                                                                  |
| BRCA1                                      | BRCA1 DNA repair associated, BRCA1, DNA repair associated, BRCAI, BRCC1, breast cancer 1, early onset, BROVCA1, FANCS, PNCA4, PPP1R53, PSCP, RNF53                                                                                                                                                                                                                                                                                                                                                                                                                                                                                                                                                                            |
| c-lap                                      | IAP, NAIP                                                                                                                                                                                                                                                                                                                                                                                                                                                                                                                                                                                                                                                                                                                     |
| Ca2+                                       | 14127-61-8, Ca+2, calcium, calcium(2+), calcium cation, calcium citrate, calcium ion, calcium, ion (Ca2+), calcium ions, Citracal, tricalcium dicitrate                                                                                                                                                                                                                                                                                                                                                                                                                                                                                                                                                                       |
| CaMKII                                     | Ca2+/CALMODULIN DEPENDENT KINASE II, Ca+/calmodulin-dependent protein kinase ii, calmodulin-dependent protein kinase 2, Calmodulin Kinase II, CAMK2, CaM Kinase II, Ccdp k ii                                                                                                                                                                                                                                                                                                                                                                                                                                                                                                                                                 |
| cAMP                                       | 11002-78-1, 33116-15-3, 3',5'-cyclic AMP, 3',5'-monophosphate, adenosine cyclic, 37839-81-9, (4aR,6R,7R,7aS)-6-(6-aminopurin-9-yl)-2-hydroxy-2-oxo-4a,6,7,7a-tetrahydro-4H-furo[3,2-d][1,3,2]dioxaphosphinin-7-ol, 54532-48-8, 55576-98-2, 60-92-4, 60667-13-8, 68407-13-6, adenosine 3',5'-phosphate, adenosine, cyclic 3',5'-(hydrogen phosphate), adenosine cyclic 3,5 monophosphate, adenosine cyclic 3',5'-monophosphate, adenosine cyclic monophosphate, C10H12N5O6P, cAMP, cyclic-3',5'-monophosphate, adenosine, cyclic adenosine monophosphate, cyclic adenylic acid, cyclic AMP, disodium salt, cyclic AMP, monoammonium salt, cyclic AMP, monopotassium salt, cyclic AMP, monosodium salt, cyclic AMP, sodium salt |
| CASP3/6/7                                  | CASP3/6/7, Caspase 3, 6, 7, Caspase-3, -6, and -7                                                                                                                                                                                                                                                                                                                                                                                                                                                                                                                                                                                                                                                                             |
| CASP9                                      | AI115399, APAF3, AW493809, Casp, Casp9 v1, Caspase-9, ICE-, ICE-LAP6, MCH6, PPP1R56                                                                                                                                                                                                                                                                                                                                                                                                                                                                                                                                                                                                                                           |
| Caspase8/10                                | Casp8/10, Caspase 8,10                                                                                                                                                                                                                                                                                                                                                                                                                                                                                                                                                                                                                                                                                                        |
| CBL                                        | 4732447J05RIK, Casitas B-lineage lymphoma, CBL2, CBLA, Cbl proto-oncogene, Cbl ubiquitin ligase, C-Cb, C-CBL, FRA11B, LOC283153, NSLL, p120 Cbl, RGD1561386, RNF55                                                                                                                                                                                                                                                                                                                                                                                                                                                                                                                                                            |
| CNDN1                                      | AI327039, B-CELL CLL/LYMPHOMA 1, bcl-, BCL1, cD1, CycD1, CYCLIN D1, Cyl-, Cyl-1, D11S287E, G1/S-Specific Cyclin D1, PR, PRAD1, U21B31                                                                                                                                                                                                                                                                                                                                                                                                                                                                                                                                                                                         |
| Cd2+                                       | 22537-48-0, cadmium(2+), cadmium acetate, cadmium cation, cadmium ion, cadmium, ion (Cd2+), Cd+2                                                                                                                                                                                                                                                                                                                                                                                                                                                                                                                                                                                                                              |
| CDC25                                      | mRNA encoding Cdc25-like                                                                                                                                                                                                                                                                                                                                                                                                                                                                                                                                                                                                                                                                                                      |
| CDC42                                      | AI747189, AU018915, CDC42Hs, cell division cycle 42, CELLULAR GROWTH REGULATING, G25K, TKS                                                                                                                                                                                                                                                                                                                                                                                                                                                                                                                                                                                                                                    |
| CDH1                                       | AA960649, ARC-1, BCDS1, cadherin 1, Cadherin E, CD324, CDHE, CSEIL, E-ca, ECAD, E-cadh, E-cadherin, L-C, L-CAM, Um, UVO, uvomorulin                                                                                                                                                                                                                                                                                                                                                                                                                                                                                                                                                                                           |
| CDK                                        | Cdks, cyclin-dependent kinase, Cyclin-Dependent Kinases, G1 CDK                                                                                                                                                                                                                                                                                                                                                                                                                                                                                                                                                                                                                                                               |
| CDK2                                       | A630093N05RIK, CDC2-RELATED KINASE, CDKN2, Cyclin A associated kinase, cyclin-dependent kinase 2, CYCLIN E ASSOCIATED KINASE, p33(CDK2)                                                                                                                                                                                                                                                                                                                                                                                                                                                                                                                                                                                       |
| CDK2-CyclinE                               | Cyclin E-CDK2                                                                                                                                                                                                                                                                                                                                                                                                                                                                                                                                                                                                                                                                                                                 |
| CDKN1A                                     | CAP, CAP20, CDK, CDK1, Cdkn, CDKN1, CDKN1A, Ci, CIP1, cyclin-dependent kinase inhibitor 1A, cyclin-dependent kinase inhibitor 1A (P21), mda, MDA-6, P2, P21, p21C, p21Cip, p21CIP1, p21W, p21WAF, p21Waf1, P21, Cyclin-Dependent Kinase Inhibitor, SD, SDI1, UV96, Waf, WAF1                                                                                                                                                                                                                                                                                                                                                                                                                                                  |
| CDKN1B                                     | AA408329, AI843786, Cdk1b, CDKN4, cyclin-dependent kinase inhibitor 1B, CYCLIN-DEPENDENT KINASE INHIBITOR P27, KIP1, MEN1B, MEN4, p2, p27, p27K, P27kip, P27KIP1, P28-ICK                                                                                                                                                                                                                                                                                                                                                                                                                                                                                                                                                     |
| CDKN2A                                     | A, Arf, ARF-INK4a, CDK4I, CDKN2, CMM2, CYCLIN-DEPENDENT KINASE INHIBITOR 2A, INK4, INK4A, INK4a-ARF, Ink4a/Arf, MLM, MTS, MTS-1, p1, p14ARF/p16INK4a, p16, p16/ARF, p16Cdkn2a, p16I, p16 INK4, p16I INK4a, P19, p19ARF, Pct, PCTR1, TP16                                                                                                                                                                                                                                                                                                                                                                                                                                                                                      |
| CDKN2B                                     | AV083695, CDK4I, cyclin-dependent kinase inhibitor 2B, INK4B, MTS, MTS2, p1, P15, p15IN, p15INK4, p15INK4b, p15(INK4b)                                                                                                                                                                                                                                                                                                                                                                                                                                                                                                                                                                                                        |
| CDKN2C                                     | C77269, CDKN6, cyclin-dependent kinase inhibitor 2C, INK, INK4C, p1, p18, p18IN, p18-INK4C, p18-INK6                                                                                                                                                                                                                                                                                                                                                                                                                                                                                                                                                                                                                          |
| CDKN2D                                     | cyclin dependent kinase inhibitor 2D, INK, INK4D, p1, p19, p19IN, p19-INK4D                                                                                                                                                                                                                                                                                                                                                                                                                                                                                                                                                                                                                                                   |
| CFLAR                                      | 2310024N18RIK, AA30105C05RIK, AU021929, Ca, CASH, CASP8 and FADD-like apoptosis regulator, CASP8AP1, Caspase 8 associated, Casper, c-F, c-FLIP, CLARP, F, FLAME, FLAME-1, FLICE-LIKE IP, FLIP, Gm9845, I-FLICE, LOC102724614, MRIT                                                                                                                                                                                                                                                                                                                                                                                                                                                                                            |
| CHEK1                                      | C85740, checkpoint kinase 1, CHK1, rad27                                                                                                                                                                                                                                                                                                                                                                                                                                                                                                                                                                                                                                                                                      |
| CHEK2                                      | CDS1, Check2, checkpoint kinase 2, CHK2, hCds1, HUCD51, LFS2, PP1425, Rad, RAD53                                                                                                                                                                                                                                                                                                                                                                                                                                                                                                                                                                                                                                              |
| CREBBP                                     | AW558298, CB, CBP, CBP/p300, CREB binding protein, KAT, KAT3A, MKHK1, p300/CBP, RSTS, RSTS1, RTS                                                                                                                                                                                                                                                                                                                                                                                                                                                                                                                                                                                                                              |
| CRK                                        | c-Crk, c-Crk2, Cr, CRK2, Crko, CRK proto-oncogene, adaptor protein, FLJ11558, p38, v-crk avian sarcoma virus CT10 oncogene homolog                                                                                                                                                                                                                                                                                                                                                                                                                                                                                                                                                                                            |
| CTNNB1                                     | armadillo, Beta-cat, beta CATENIN, Bfc, Cat, CATENIN beta, catenin beta 1, catenin (cadherin associated protein), beta 1, catenin (cadherin associated protein), $\beta$ 1, CATENIN $\beta$ , catenin $\beta$ 1, CATNB, CTNB1, CTNNB, CTNN beta, CTNN $\beta$ , EVR7, Mesc, MRD19, NEDSDV, $\beta$ -cat, $\beta$ -catenin                                                                                                                                                                                                                                                                                                                                                                                                     |
| CTNND1                                     | AA409437, AU019353, BCDS2, Ca, Cas, catenin (cadherin associated protein), delta 1, catenin (cadherin associated protein), $\delta$ 1, catenin delta 1, catenin $\delta$ 1, CATNS, Ctn, CTNNB, CTNN delta, CTNN delta1, CTNN $\delta$ , CTNN $\delta$ , mKIAA0384, P12, P120, P120CAS, p120(CAS), p120-Catenin, P120CTN, p120(CTN), Pp120                                                                                                                                                                                                                                                                                                                                                                                     |
| CTNN $\alpha$ -CTNN $\beta$ -CTNN $\delta$ | CTNNalpha-CTNNbeta-CTNNdelta                                                                                                                                                                                                                                                                                                                                                                                                                                                                                                                                                                                                                                                                                                  |
| CyclinD                                    | CycD, Cyclin D1                                                                                                                                                                                                                                                                                                                                                                                                                                                                                                                                                                                                                                                                                                               |
| CYCS                                       | CYC, CYCSA, CYTC, CYTOC, CYTOCHROME C, cytochrome c, somatic, cytochrome c, somatic-like, ENSMUSG0000058927, HCS, LOC100363502, THC4, X laevis XLCL2                                                                                                                                                                                                                                                                                                                                                                                                                                                                                                                                                                          |
| DAG                                        | DAG, diacylglycerides, diglyceride                                                                                                                                                                                                                                                                                                                                                                                                                                                                                                                                                                                                                                                                                            |
| DAXX                                       | BING2, DAP6, death-domain associated protein, EAP1, Fas death domain-associated protein, PML ASSOCIATED FACTOR                                                                                                                                                                                                                                                                                                                                                                                                                                                                                                                                                                                                                |
| DIABLO                                     | 0610041G12RIK, 1700006L01RIK, AU040403, DFNA64, diablo IAP-binding mitochondrial protein, diablo, IAP-binding mitochondrial protein, Sm, SMAC                                                                                                                                                                                                                                                                                                                                                                                                                                                                                                                                                                                 |
| DVL1                                       | DISHEVELED, dishevelled segment polarity protein 1, DRS2, DSH, DVL, DVL1L1, DVL1P1, mKIAA4029                                                                                                                                                                                                                                                                                                                                                                                                                                                                                                                                                                                                                                 |
| ELK1                                       | ELK, ELK1, member of ETS oncogene family, ETS transcription factor ELK1, p62TCF, RGD:2549, TCF/ELK                                                                                                                                                                                                                                                                                                                                                                                                                                                                                                                                                                                                                            |
| EP300                                      | A430090G16, A730011L11, E1A binding protein p300, KAT3, KAT3B, MKHK2, p30, p300, p300 HAT, RSTS2                                                                                                                                                                                                                                                                                                                                                                                                                                                                                                                                                                                                                              |
| ERK1/2                                     | MAPK p44/42, MAPK p44/p42, p42/44 mapk, P42/p44 erk, P42/p44 mapk, p42/p44 MAP KINASE                                                                                                                                                                                                                                                                                                                                                                                                                                                                                                                                                                                                                                         |
| FADD                                       | DEATH domain-containing ADAPTOR, Fas associated via death domain, Fas (TNFRSF6)-associated via death domain, GIG3, MORT1, Mort1/F, Mort1/FADD                                                                                                                                                                                                                                                                                                                                                                                                                                                                                                                                                                                 |
| FANCD2                                     | 2410150007RIK, AU015151, BB137857, FA4, FACD, FA complementation group D2, FAD, FA-D2, FANCD, Fanconi anaemia, complementation group D2, Fanconi anemia, complementation group D2                                                                                                                                                                                                                                                                                                                                                                                                                                                                                                                                             |
| FAS                                        | AI196731, ALPS1A, AP, APO-1, APT1, CD95, CD95L, CD95 receptor, FAS1, FAS/APO1, Fas cell surface death receptor, FasR, FASTM, Fas (TNF receptor superfamily member 6), Ipr, Receptor for Fas Ligand, Receptors for Fas Ligand, TNF, Tnfr, TNFR6, Tnf receptor member 6, TNFRSF6                                                                                                                                                                                                                                                                                                                                                                                                                                                |
| FASLG                                      | ALPS1B, APT1, APT1LG1, APTL, CD178, CD95, CD95-L, F, Fa, FASL, Fas Ligand, Fas ligand (TNF superfamily, member 6), gld, mFasL, Tnfr6, Tnfs, TNFSF6, TNLG1A                                                                                                                                                                                                                                                                                                                                                                                                                                                                                                                                                                    |
| FOS                                        | AP-1, c-, C-FOS, D12Rfj, D12Rfj, FBJ osteosarcoma oncogene, Fos proto-oncogene, AP-1 transcription factor subunit, p55                                                                                                                                                                                                                                                                                                                                                                                                                                                                                                                                                                                                        |
| FOXO1                                      | Afx, Afxh, AI876417, FKX, FKH1, FKHR, FKHR1, Forkhead, forkhead box O1, Fox, FOXO1A                                                                                                                                                                                                                                                                                                                                                                                                                                                                                                                                                                                                                                           |
| Frizzled                                   | Frizzled receptor, FZ, FZD, Wnt receptor                                                                                                                                                                                                                                                                                                                                                                                                                                                                                                                                                                                                                                                                                      |
| Frizzled-LRP                               | FZD-LRP1/5/6                                                                                                                                                                                                                                                                                                                                                                                                                                                                                                                                                                                                                                                                                                                  |
| FYN                                        | AI448320, AW552119, C-FYN, Fyn proto-oncogene, Src family tyrosine kinase, FYNT, LOC102724705, p59-FYN, p59 Fyn B, SLK, SRC-LIKE KINASE, SYN                                                                                                                                                                                                                                                                                                                                                                                                                                                                                                                                                                                  |
| G protein                                  | Galphabeta-gamma, Galpha-Gbeta-Ggamma, Galphai-Gbeta-Ggamma, Galphaq-Gbeta-Ggamma, Gpro, G protein alpha beta gamma, G protein alpha-G protein beta-GDP-G protein gamma, G protein alpha-G protein beta-G protein gamma, G-protein complex, G protein $\alpha$ -G protein $\beta$ -GDP-G protein $\gamma$ , G protein $\alpha$ -G protein $\beta$ -G protein $\gamma$ , G-protein $\alpha$ - $\beta$ - $\gamma$ , Guanine nucleotide binding protein, Ga-G $\beta$ -G $\gamma$ , Gai-G $\beta$ -G $\gamma$ , Gaq-G $\beta$ -G $\gamma$ , Go $\beta$                                                                                                                                                                           |
| G proteinalpha                             | Galpha, G-Protein Alpha Subunit, G protein $\alpha$ , G-Protein $\alpha$ Subunit, Ga                                                                                                                                                                                                                                                                                                                                                                                                                                                                                                                                                                                                                                          |
| Gammasecretase                             | Gamma Secretase, Secretase $\gamma$ , $\gamma$ -Secretase                                                                                                                                                                                                                                                                                                                                                                                                                                                                                                                                                                                                                                                                     |
| GLI1                                       | AV235269, GL1, GLI, GLI family zinc finger 1, GLI-Kruppel family member GLI1, PAPA8, PPD1, Zfp-, ZFP5                                                                                                                                                                                                                                                                                                                                                                                                                                                                                                                                                                                                                         |
| GRB2                                       | AA408164, ASH, Ash-psi, EGFRBP-GRB2, GRAB2, GRBS, growth factor receptor bound protein 2, MST084, MSTP084, NCKAP2                                                                                                                                                                                                                                                                                                                                                                                                                                                                                                                                                                                                             |
| Grb2-Shc1-Sos                              | Grb2-Sos-Shc, SHC-GRB2-SOS                                                                                                                                                                                                                                                                                                                                                                                                                                                                                                                                                                                                                                                                                                    |
| GSK3                                       | Glycogen synthase kinase, Gsk, GSK3 alpha/beta, GSK3 $\alpha/\beta$                                                                                                                                                                                                                                                                                                                                                                                                                                                                                                                                                                                                                                                           |
| GSK3beta-Axin-APC-CTnnbeta                 | APC-CTNNbeta-AXIN-GSK3beta, APC-CTNN $\beta$ -AXIN-GSK3 $\beta$ , AXIN-APC-GSKbeta-CTNNbeta, AXIN-APC-GSK $\beta$ -CTNN $\beta$ , GSK3 $\beta$ -AXIN-APC-CTNN $\beta$                                                                                                                                                                                                                                                                                                                                                                                                                                                                                                                                                         |
| GSK3B                                      | 7330414F15RIK, 8430431H08RIK, C86142, glycogen synthase kinase 3 beta, glycogen synthase kinase 3 $\beta$ , GSK-, GSK-3, GSK-3be, GSK-3beta, GSK-3 $\beta$ , GSKbeta, GSK $\beta$ , Tpk1                                                                                                                                                                                                                                                                                                                                                                                                                                                                                                                                      |
| HAT1                                       | 2410071B14RIK, AA536933, histone acetyltransferase 1, histone aminotransferase 1, KAT, KAT1                                                                                                                                                                                                                                                                                                                                                                                                                                                                                                                                                                                                                                   |
| Hedgehog                                   | Hh                                                                                                                                                                                                                                                                                                                                                                                                                                                                                                                                                                                                                                                                                                                            |
| HIF1A                                      | AA959795, bHLHe7, bHLHe78, HIF-1, HIF1-ALPHA, HIF-1alpha (hydroxylated), HIF-1 $\alpha$ , HIF-1 $\alpha$ (hydroxylated), Hypoxia inducible factor 1 alpha subunit, hypoxia inducible factor 1, alpha subunit, hypoxia inducible factor 1 subunit alpha, hypoxia inducible factor 1 subunit $\alpha$ , Hypoxia inducible factor 1 $\alpha$ subunit, hypoxia inducible factor 1, $\alpha$ subunit, MO, MOP1, PASD8                                                                                                                                                                                                                                                                                                              |

| Symbol                         | Synonym(s)                                                                                                                                                                                                                                                                                                                                                                                                                                                                                                                                                                                                                                                                                                                                       |
|--------------------------------|--------------------------------------------------------------------------------------------------------------------------------------------------------------------------------------------------------------------------------------------------------------------------------------------------------------------------------------------------------------------------------------------------------------------------------------------------------------------------------------------------------------------------------------------------------------------------------------------------------------------------------------------------------------------------------------------------------------------------------------------------|
| HIF1alpha-NICD                 | HIF1α-NICD                                                                                                                                                                                                                                                                                                                                                                                                                                                                                                                                                                                                                                                                                                                                       |
| HIPK2                          | 1110014020RIK, B230339E18RIK, homeodomain interacting protein kinase 2, LOC100505582, LOC653052, PRO0593, St, Stank                                                                                                                                                                                                                                                                                                                                                                                                                                                                                                                                                                                                                              |
| Ikb                            | I KAPPA B, Ikbeta, IκB, Iκ-B                                                                                                                                                                                                                                                                                                                                                                                                                                                                                                                                                                                                                                                                                                                     |
| IκB-NfκB                       | IκappaB-NFκappaB, IκB-NFκB, NFκB-IκB                                                                                                                                                                                                                                                                                                                                                                                                                                                                                                                                                                                                                                                                                                             |
| Integrin                       | Integrin alpha-beta, integrin-extracellular matrix, INTEGRIN receptor, Integrin α-β                                                                                                                                                                                                                                                                                                                                                                                                                                                                                                                                                                                                                                                              |
| IP3                            | 27121-73-9, inositol trisphosphate, IP3, myo-inositol, tris(dihydrogen phosphate)                                                                                                                                                                                                                                                                                                                                                                                                                                                                                                                                                                                                                                                                |
| IRS1                           | ENSMUSG00000022591, G972, G972R, HIRS-1, insulin receptor substrate 1, IR, IRS1IRM                                                                                                                                                                                                                                                                                                                                                                                                                                                                                                                                                                                                                                                               |
| JAK                            | JAK kinase                                                                                                                                                                                                                                                                                                                                                                                                                                                                                                                                                                                                                                                                                                                                       |
| Jnk                            | JNK 54/46, Jnk p56, JNK/SAPK, JUN KINASE, p40, p47, Sapk/Jnk                                                                                                                                                                                                                                                                                                                                                                                                                                                                                                                                                                                                                                                                                     |
| JUN                            | Activator protein 1, AP-1, AP1, c-ju, cJUN, Junc, jun proto-oncogene, Jun proto-oncogene, AP-1 transcription factor subunit, LOC100288387, LOC100291417, LOC100293034, p39, v-Jun, V-jun Avian Sarcoma Virus 17 Oncogene Homolog, V-jun Sarcoma Virus 17 Oncogene Homolog                                                                                                                                                                                                                                                                                                                                                                                                                                                                        |
| LAMTOR3                        | AW556229, late endosomal/lysosomal adaptor, MAPK and MTOR activator 3, LOC100132990, Map, Map2k, MAP2K1IP1, MAPBP, MAPKSP1, Mek binding partner 1, Mp, MP1, PRO0633, Regulator3                                                                                                                                                                                                                                                                                                                                                                                                                                                                                                                                                                  |
| LEF1                           | 3000002B05, A1451430, Lef-, lymphoid enhancer binding factor 1, TCF10, TCF1ALPHA, TCF7L3, TCF/LEF                                                                                                                                                                                                                                                                                                                                                                                                                                                                                                                                                                                                                                                |
| MAP2K1/2                       | MEK1/2, MKK1/2                                                                                                                                                                                                                                                                                                                                                                                                                                                                                                                                                                                                                                                                                                                                   |
| MAP3K5                         | 7240542D20RIK, A, APOPTOSIS SIGNAL REGULATED KINASE 1, AS, ASK, ASK1, M3K5, MAPKKK5, MEKK5, mitogen-activated protein kinase kinase 5, RGD1306565                                                                                                                                                                                                                                                                                                                                                                                                                                                                                                                                                                                                |
| MAP3K7                         | CSCF, FMD2, Map3k7 predicted, MEKK7, mitogen-activated protein kinase kinase kinase 7, TAK1, TGF1a, tgf β activated kinase 1                                                                                                                                                                                                                                                                                                                                                                                                                                                                                                                                                                                                                     |
| Map3k7-Map3k7ip1-              | Tab1-Tab2-Tak1                                                                                                                                                                                                                                                                                                                                                                                                                                                                                                                                                                                                                                                                                                                                   |
| MAX                            | AA960152, A1875693, bHLHd, bHLHd4, bHLHd5, bHLHd6, bHLHd7, bHLHd8, Max protein, MYC associated factor X, Myn                                                                                                                                                                                                                                                                                                                                                                                                                                                                                                                                                                                                                                     |
| Max-Myc                        | cMyc-MAX, Myc-MAX                                                                                                                                                                                                                                                                                                                                                                                                                                                                                                                                                                                                                                                                                                                                |
| MDM2                           | 1700007J15Rik, AA415488, ACTFS, hdm2, HDMX, LSKB, MDM2-A1, MDM2 proto-oncogene, MGC5370, Transformed 3T3 cell double minute 2, transformed mouse 3T3 cell double minute 2                                                                                                                                                                                                                                                                                                                                                                                                                                                                                                                                                                        |
| Mkk3/6                         | MEK3/6, MKK3/6 (mitogen activated protein kinase kinase 3/6), MKK3/MKK6                                                                                                                                                                                                                                                                                                                                                                                                                                                                                                                                                                                                                                                                          |
| MYC                            | AU016757, bHLHe3, bHLHe39, CMYC, C-MYC-P64, mMyc, MRTL, Myc2, MYCC, MYC proto-oncogene, bHLH transcription factor, myelocytomatosis oncogene, N, Niard, Nird, RNCMYC                                                                                                                                                                                                                                                                                                                                                                                                                                                                                                                                                                             |
| NBN                            | ATV, AT-V1, AT-V2, Nb, NBS, NBS1, NIBRIN, P95                                                                                                                                                                                                                                                                                                                                                                                                                                                                                                                                                                                                                                                                                                    |
| NCSTN                          | 9430068N19RIK, AA727311, APH2, ATAG1874, D1Dau13, D1Dau13e, Kiaa0253, mKIAA0253, Nc, NCT, ni, NICASTRIN                                                                                                                                                                                                                                                                                                                                                                                                                                                                                                                                                                                                                                          |
| NF1                            | AW494271, Dsk, Dsk9, E030030H24RIK, LOC646021, Mhdads, Mhdadsk9, Neurofibromatosis 1, NEUROFIBROMIN, neurofibromin 1, Nf-, NF1-GAP, NFNS, VRNF, WSS                                                                                                                                                                                                                                                                                                                                                                                                                                                                                                                                                                                              |
| NFκB                           | NF-KAPPA B, NF-κ B, nuclear factor-κ b, transcription factor nuclear factor κ b                                                                                                                                                                                                                                                                                                                                                                                                                                                                                                                                                                                                                                                                  |
| NLK                            | A1194375, LOC100044468, nemo like kinase, RGD1561602                                                                                                                                                                                                                                                                                                                                                                                                                                                                                                                                                                                                                                                                                             |
| NOTCH1                         | 9930111A19RIK, AOS5, AOVd1, hN1, lin, lin-12, Mi, Mis6, N, N1, NOTCH1, notch receptor 1, Ta, TAN1                                                                                                                                                                                                                                                                                                                                                                                                                                                                                                                                                                                                                                                |
| p38MAPK                        | P38, p38 MAP KINASE, P38 MITOGEN-ACTIVATED protein KINASE                                                                                                                                                                                                                                                                                                                                                                                                                                                                                                                                                                                                                                                                                        |
| Patched                        | PTC, PTCH                                                                                                                                                                                                                                                                                                                                                                                                                                                                                                                                                                                                                                                                                                                                        |
| PI3K                           | 1-phosphatidylinositol 3-kinase, 2.7.1.137, ATP:1-phosphatidyl-1D-myo-inositol 3-phosphotransferase, Phosphatidylinositol 3 kinase, phosphatidylinositol 3'-kinase, PI3-kinase, PtdIns 3 Kinase, type III phosphoinositide 3-kinase, type I phosphatidylinositol kinase, Vps34p                                                                                                                                                                                                                                                                                                                                                                                                                                                                  |
| PIP2                           | 1,2-diacyl-sn-glycero-(1'-myo-inositol-4',5'-bisphosphate), 1-O-(3-sn-phosphatidyl)-1D-myo-inositol 4,5-bis(dihydrogen phosphate), 1-phosphatidyl-1D-myo-inositol 4,5-bisphosphate, C11H19O19P3R2                                                                                                                                                                                                                                                                                                                                                                                                                                                                                                                                                |
| PIP3                           | 1-phosphatidyl-1D-myo-inositol 3,4,5-trisphosphate, phosphatidylinositol 3,4,5-trisphosphate, phosphoinositide (3,4,5) P3, PI(3,4,5)P3, Plns(3,4,5)P3, PIP3, PtdIns(3,4,5)P3                                                                                                                                                                                                                                                                                                                                                                                                                                                                                                                                                                     |
| PKA                            | A-Kinase, cAMP-Dependent Protein Kinase, cyclic AMP depended protein kinase, protein KINASE A                                                                                                                                                                                                                                                                                                                                                                                                                                                                                                                                                                                                                                                    |
| PKC                            | Cnpkc, PKC, Pkc(s), Protein Kinase C                                                                                                                                                                                                                                                                                                                                                                                                                                                                                                                                                                                                                                                                                                             |
| Plcbeta                        | Phospholipase c beta, Phospholipase C β, PLCB, PLCβ                                                                                                                                                                                                                                                                                                                                                                                                                                                                                                                                                                                                                                                                                              |
| PMAIP1                         | APR, N, NOXA, phorbol-12-myristate-13-acetate-induced protein 1                                                                                                                                                                                                                                                                                                                                                                                                                                                                                                                                                                                                                                                                                  |
| Presenilin                     | PS, PS1/2, PSEN1/2                                                                                                                                                                                                                                                                                                                                                                                                                                                                                                                                                                                                                                                                                                                               |
| PRKDC                          | A1326420, AU019811, DNA-, DNA-DEPENDENT protein KINASE, DNAPDCs, DNAPK, DNA-PKC, DNA-PKcs, DNPK1, DOX, DOXNPH, dxn, dxnph, HYRC, HYRC1, IMD26, p350, p460, Prkdc predicted, protein kinase, DNA activated, catalytic polypeptide, protein kinase, DNA-activated, catalytic subunit, scid, slip, XRCC, XRCC7                                                                                                                                                                                                                                                                                                                                                                                                                                      |
| PSENEN                         | 1700023M09RIK, ACNINV2, MDS033, MSTP064, PEN-2, presenilin enhancer gamma secretase subunit, presenilin enhancer, gamma-secretase subunit, presenilin enhancer γ secretase subunit, presenilin enhancer, γ-secretase subunit, RGD1312037                                                                                                                                                                                                                                                                                                                                                                                                                                                                                                         |
| PTCH1                          | A230106A15RIK, BCNS, mes, NBCCS, patched 1, Pt, PTC, PTC1, PTCH, Ptch2, wi, wig                                                                                                                                                                                                                                                                                                                                                                                                                                                                                                                                                                                                                                                                  |
| PTK2                           | FA, Fad, FADK, FADK 1, FAK, FAK1, FAK related non-kinase, FR, p125FAK, pp125FAK, PPP1R71, protein tyrosine kinase 2, PTK2 protein tyrosine kinase 2, TYROSINE KINASE 2                                                                                                                                                                                                                                                                                                                                                                                                                                                                                                                                                                           |
| PTPN11                         | 2700084A17RIK, AW536184, BPTP3, CFC, JMML, METCDS, MGC14433, Noonan syndrome 1, NS1, protein tyrosine phosphatase non-receptor type 11, protein tyrosine phosphatase, non-receptor type 11, PTP, PTP-1D, PTP2C, S, SAP-2, Sh, SH-P, SHP-2, SH-PTP2, SH-PTP3, Src homology protein 2, SYP                                                                                                                                                                                                                                                                                                                                                                                                                                                         |
| RAF1                           | 6430402F14RIK, AA990557, BB129353, CMD1NN, c-R, Cra, CRAF, Craf1, D830050J10RIK, leukaemia ONCOGENE HOMOLOG1, LEUKEMIA ONCOGENE HOMOLOG1, NS5, Raf-1 proto-oncogene, serine/threonine kinase, v-, v-Raf, v-raf-leukaemia viral oncogene 1, v-raf-leukemia viral oncogene 1                                                                                                                                                                                                                                                                                                                                                                                                                                                                       |
| Ral                            | Ral A/B                                                                                                                                                                                                                                                                                                                                                                                                                                                                                                                                                                                                                                                                                                                                          |
| RALBP1                         | DNP-SG ATPase, R, ralA binding protein 1, Ral GAP, Rik, RIP1, RL, RLIP1, RLIP76                                                                                                                                                                                                                                                                                                                                                                                                                                                                                                                                                                                                                                                                  |
| RALGDS                         | Gn, Gnds, Hs.560937, mKIAA1308, Ra, RalGDSB, RalGEF, ral guanine nucleotide dissociation stimulator, Rg, RGDS, RGF                                                                                                                                                                                                                                                                                                                                                                                                                                                                                                                                                                                                                               |
| RAPGEF1                        | 4932418O06RIK, C3G, C3G-1, C3G-2, Grf, GRF2, Rap guanine nucleotide exchange factor 1, Rap guanine nucleotide exchange factor (GEF) 1                                                                                                                                                                                                                                                                                                                                                                                                                                                                                                                                                                                                            |
| RAPGEF3                        | 2310016P22RIK, 9330170P05RIK, bcm910, CAMP-GEFI, CGEF1, Epa, EPAC, EPAC1, HSU79275, Rap guanine nucleotide exchange factor 3, Rap guanine nucleotide exchange factor (GEF) 3                                                                                                                                                                                                                                                                                                                                                                                                                                                                                                                                                                     |
| Ras-grf                        | Guanine Nucleotide Releasing                                                                                                                                                                                                                                                                                                                                                                                                                                                                                                                                                                                                                                                                                                                     |
| RASA1                          | CM-AVM, CMAVM1, G, GAP, GAPX, p120-, p120GAP, P120RASGAP, PKWS, RASA, RASGAP, RAS p21 protein activator 1                                                                                                                                                                                                                                                                                                                                                                                                                                                                                                                                                                                                                                        |
| RASGRP1                        | CALDAG-GEFI, CALDAG-GEFII, IMD64, RASGRP, RAS guanyl releasing protein 1                                                                                                                                                                                                                                                                                                                                                                                                                                                                                                                                                                                                                                                                         |
| Rb-E2Ftranscription repression | Rb1-E2f1, Rb-E2F, Rb-E2F1                                                                                                                                                                                                                                                                                                                                                                                                                                                                                                                                                                                                                                                                                                                        |
| RB1                            | OSRC, p, p105, p105-Rb, p110 RB, p110-RB1, pp105, pp110, PPP1R130, pRb, R, RB, RB-ASSOCIATED, RB transcriptional corepressor 1, Retinoblastome tumor-suppression protein rb                                                                                                                                                                                                                                                                                                                                                                                                                                                                                                                                                                      |
| RBL1                           | AW547426, CP107, LOC683869, p10, p107, PRB1, RB transcriptional corepressor like 1                                                                                                                                                                                                                                                                                                                                                                                                                                                                                                                                                                                                                                                               |
| RBPJ                           | A1843960, AOS3, CBF-1, csl, Igg, Iggj, IGKJRB, IGKJRB1, Iggksbp, KBF2, RBP, RBP 2N, RBP-JK, RBP-J kappa, RBP-J κ, RBPSUH, Rbpsuh1, Recombination signal binding, recombination signal binding protein for immunoglobulin kappa J region, recombination signal binding protein for immunoglobulin κ J region, SUH                                                                                                                                                                                                                                                                                                                                                                                                                                 |
| RHO                            | GTPase Rho, Rho, Rho Family, RHO-GTPASE, Rho-like Gtpase                                                                                                                                                                                                                                                                                                                                                                                                                                                                                                                                                                                                                                                                                         |
| SHC1                           | p52SHC, p6, p66, p66s, P66shc, Sh, SHC, Shc (46 kDa isoform), SHCA, SHC adaptor protein 1, Shc p66 isoform, src homology 2 domain-containing transforming protein C1                                                                                                                                                                                                                                                                                                                                                                                                                                                                                                                                                                             |
| Smad1/5/8                      | SMAD1/5/8                                                                                                                                                                                                                                                                                                                                                                                                                                                                                                                                                                                                                                                                                                                                        |
| Smad1/5/8-Smad2/3-             | SMAD 1,4,5,8                                                                                                                                                                                                                                                                                                                                                                                                                                                                                                                                                                                                                                                                                                                                     |
| Smad2/3-                       | Smad 2/3/4                                                                                                                                                                                                                                                                                                                                                                                                                                                                                                                                                                                                                                                                                                                                       |
| SMAD4                          | AW743858, D18Wsu70, D18Wsu70e, DPC, DPC4, JIP, Madh, MADH4, MYHRS, SMAD family member 4, Smaug1                                                                                                                                                                                                                                                                                                                                                                                                                                                                                                                                                                                                                                                  |
| SMAD6                          | AOVD2, b2b390K, b2b390Clo, HsT17432, Madh, MADH6, MADH7, SMAD family member 6                                                                                                                                                                                                                                                                                                                                                                                                                                                                                                                                                                                                                                                                    |
| SMAD7                          | CRC33, Madh, MADH7, MADH8, SMAD family member 7                                                                                                                                                                                                                                                                                                                                                                                                                                                                                                                                                                                                                                                                                                  |
| SMO                            | bnb, CRJS, E130215L21RIK, FZD11, Gx, PHL5, SMOH, Smoothened, smoothened, frizzled class receptor                                                                                                                                                                                                                                                                                                                                                                                                                                                                                                                                                                                                                                                 |
| SRC                            | ASV, AW259666, B527, c-SRC, p60-Src, PP60, Pp60/c-Src, pp60c, pp60c-src, Rous sarcoma oncogene, SRC1, SRC proto-oncogene, non-receptor tyrosine kinase, THC6, TVHUSC                                                                                                                                                                                                                                                                                                                                                                                                                                                                                                                                                                             |
| STK36                          | 1700112N14RIK, B930045J24, FU, Fuse, Fused, mKIAA1278, serine/threonine kinase 36, Stk36 (predicted)                                                                                                                                                                                                                                                                                                                                                                                                                                                                                                                                                                                                                                             |
| SUFU                           | b2b273C, JBT332, PRO1280, Su, SUFUH, SUFU negative regulator of hedgehog signaling, SUFUXL                                                                                                                                                                                                                                                                                                                                                                                                                                                                                                                                                                                                                                                       |
| SYNGAP1                        | Gm1963, MRD5, RASA1, RASA5, Sy, Synaptic Ras-GAP 1, synaptic Ras GTPase activating protein 1 homolog (rat), SYNGAP                                                                                                                                                                                                                                                                                                                                                                                                                                                                                                                                                                                                                               |
| TAB2                           | 1110030N06RIK, A530078N03RIK, CHTD2, LOC101928709, Map3k, MAP3K7IP2, mKIAA0733, RP1 111D63, TGF-beta activated kinase 1 (MAP3K7) binding protein 2, TGF-beta activated kinase 1/MAP3K7 binding protein 2, TGF-β activated kinase 1 (MAP3K7) binding protein 2, TGF-β activated kinase 1/MAP3K7 binding protein 2                                                                                                                                                                                                                                                                                                                                                                                                                                 |
| TBID                           | 2700049M22RIK, A1875481, AU022477, BH3 interacting domain death agonist, cBid, FP497                                                                                                                                                                                                                                                                                                                                                                                                                                                                                                                                                                                                                                                             |
| Tgfbeta                        | Tgfb, TGF-beta 1, 2, and 3, TGF β, TGF-β 1, 2, and 3, transforming growth factor-β                                                                                                                                                                                                                                                                                                                                                                                                                                                                                                                                                                                                                                                               |
| Tgfbetarecept                  | TgfbetaR, TGFBR, TGFBR, Tgf β receptor                                                                                                                                                                                                                                                                                                                                                                                                                                                                                                                                                                                                                                                                                                           |
| TGFBFR1                        | AAT5, ACVRLK4, AL, Aik, ALK-5, AU017191, ESK2, ESS1, LDS1, LDS1A, LDS2A, LOC103690035, LOC666236, MSSE, SKR4, Tbet, Tbeta, TbetaR-I, TBR-I, TGFbeta1R1, TGF-beta1 receptor, TGF beta 1 receptor, TGF-beta-r1, TGF beta receptor type I, TGFbetaRl, Tgfb receptor 1, TGFR-1, TGFβ1R1, TGF β I receptor, TGFβ R1, Tgf-β R1/R4, Tgf-β receptor1, TGF β receptor type I, TGFβRl, TGF β type 1 receptors, Tgf β type I receptors, transforming growth factor beta receptor 1, transforming growth factor beta receptor 1, transforming growth factor-β receptor 1, transforming growth factor, β receptor 1, transforming growth factor, β receptor I, transforming growth factor-β receptor type 1, T β R1                                           |
| TGFBFR2                        | 1110020H15RIK, AAT3, AU042018, DNIIR, FAA3, LDS1B, LDS2, LDS2B, MFS2, RIIC, RIIDN, TAAD2, Tbet, Tbeta, TbetaR-II, TBR, TBR-II, TBRLL, TGFbeta1R2, TGF-beta 2, Tgf beta2 receptor, TGFbeta R2, TGF-beta receptor 2, TGF-beta receptor type 2, TGF beta receptor type II, TGFbeta-Rll, TgfbR2T, TGFβ receptor II, TgfbRl, TGF-β R2, TGFβ R2, TGF-β receptor 2, TGF-β receptor type 2, TGF β receptor type II, TGFβRll, Tgf-β type II receptor, transforming growth factor beta receptor 2, transforming growth factor, beta receptor 2, transforming growth factor, beta receptor II, transforming growth factor β receptor 2, transforming growth factor, β receptor 2, transforming growth factor, β receptor II, type 2 TGF-β receptors, T β r2 |
| TP53                           | bbi, BCC7, bhy, bly, BMF55, LFS1, p4, p44, p5, P53, P53 cellular tumour antigen, p53 tumor suppressor, transformation related protein 53, TRP53, tumor protein p53, tumour protein p53                                                                                                                                                                                                                                                                                                                                                                                                                                                                                                                                                           |
| Type I BMP                     | ALK 3,6, ALK 3/6, BMP2 receptor type1, BMP4 receptor type1, Bmpr1, Bmprl                                                                                                                                                                                                                                                                                                                                                                                                                                                                                                                                                                                                                                                                         |
| WNT1                           | BMND16, Int, INT1, OI15, sw, swaying, Wg, wingless-type MMTV integration site family, member 1, Wnt-, Wnt family member 1                                                                                                                                                                                                                                                                                                                                                                                                                                                                                                                                                                                                                        |
| WNT5A                          | 8030457G12RIK, hWNT5A, LOC102724616, wingless-type MMTV integration site family, member 5A, Wnt-, Wnt family member 5A                                                                                                                                                                                                                                                                                                                                                                                                                                                                                                                                                                                                                           |
| ZBTB17                         | AA589413, Lp1, Miz, MIZ-1, mZ13, pHZ-67, Zfp10, Zfp100, Zinc finger and BTB domain containing 17, ZNF151, ZNF60                                                                                                                                                                                                                                                                                                                                                                                                                                                                                                                                                                                                                                  |

# Pathway Analysis Using IPA Software; canonical pathway

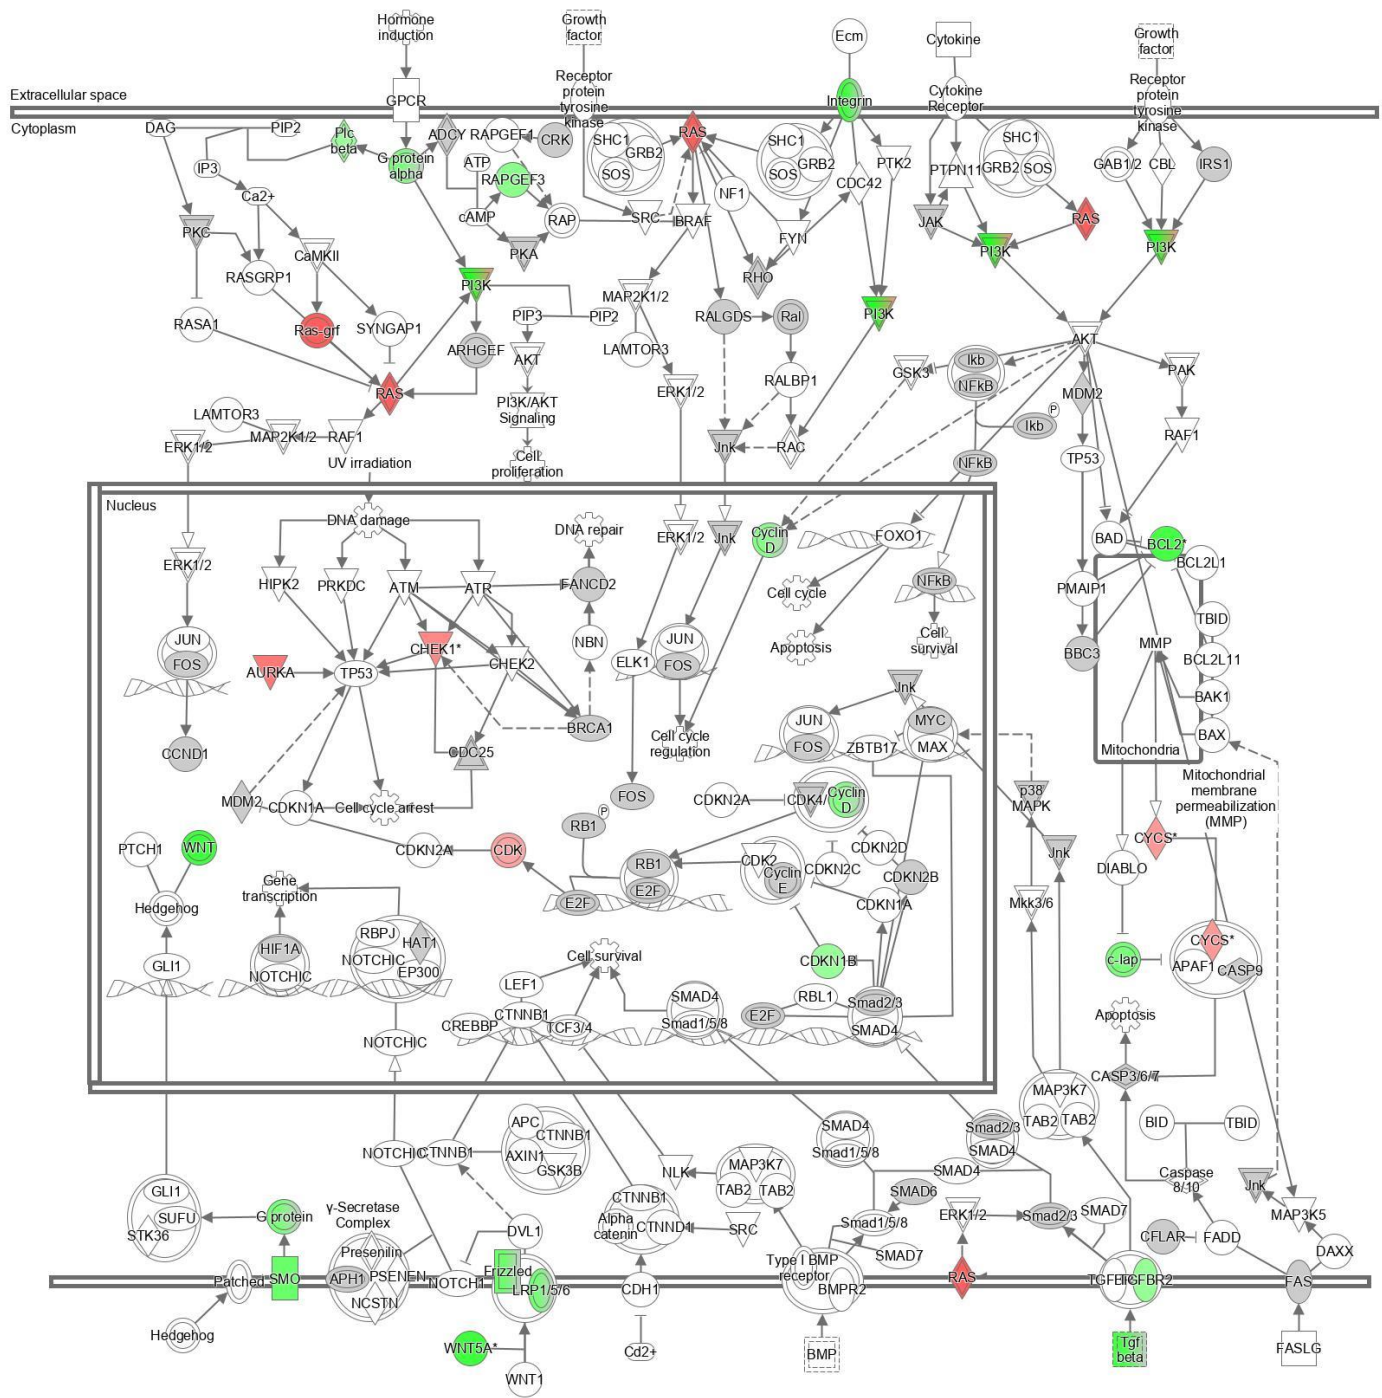

Figure S58. Molecular Mechanism of cancer at 8 days

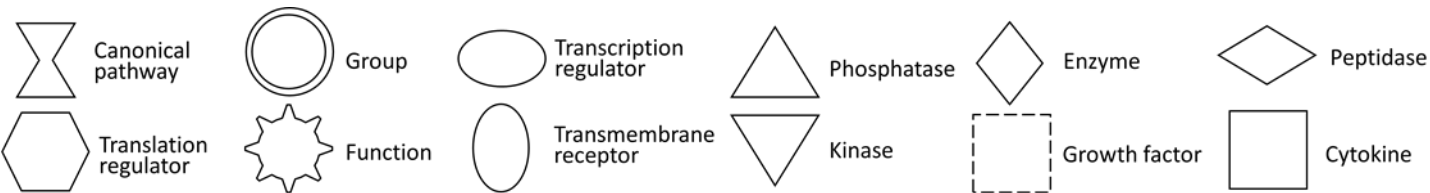

Red: Increased, FDR<0.05 versus solvent control

Green: Decreased, FDR<0.05 versus solvent control

| Symbol                                     | Synonym(s)                                                                                                                                                                                                                                                                                                                                                                                                                                                                                                                                                                                                                                                                     |
|--------------------------------------------|--------------------------------------------------------------------------------------------------------------------------------------------------------------------------------------------------------------------------------------------------------------------------------------------------------------------------------------------------------------------------------------------------------------------------------------------------------------------------------------------------------------------------------------------------------------------------------------------------------------------------------------------------------------------------------|
| ADCY                                       | 3',5'-cyclic AMP synthetase, 4.6.1.1, AC, Adenylate Cyclase, Adenyl Cyclase, Adenylyl cyclase, ATP diphosphate-lyase (cyclizing), mAC, sAC                                                                                                                                                                                                                                                                                                                                                                                                                                                                                                                                     |
| AKT                                        | AKT1/2/3, B/Akt, PKB, RAC-PK                                                                                                                                                                                                                                                                                                                                                                                                                                                                                                                                                                                                                                                   |
| Alphacatenin                               | CTNN alpha, CTNN $\alpha$ , $\alpha$ catenin                                                                                                                                                                                                                                                                                                                                                                                                                                                                                                                                                                                                                                   |
| Ap1                                        | activator protein-1, c-Jun                                                                                                                                                                                                                                                                                                                                                                                                                                                                                                                                                                                                                                                     |
| APAF1                                      | D630400I06RIK, Ap, Apaf1, apoptotic peptidase activating factor 1, CED4, fog, mKIAA0413                                                                                                                                                                                                                                                                                                                                                                                                                                                                                                                                                                                        |
| APC                                        | A1047805, APC1, Ap $\gamma$ , APC (PROC), APC regulator of WNT signaling pathway, APC, WNT signaling pathway regulator, AU020952, AW124434, BTPS2, CC1, DESMD, DP2, DP2.5, DP3, Familial adenomatous polyposis, GS, M, mAPC, Min, PPP1R46, RATAPC                                                                                                                                                                                                                                                                                                                                                                                                                              |
| Apoptosome                                 | APAF1-Caspase 9-CytoC, apoptosis adaptor protein complex, Cytochrome C-APAF1-Caspase 9                                                                                                                                                                                                                                                                                                                                                                                                                                                                                                                                                                                         |
| ARHGEF                                     | Ras GEF, RhOGEF                                                                                                                                                                                                                                                                                                                                                                                                                                                                                                                                                                                                                                                                |
| ATM                                        | A1256621, AT1, ATA, ataxia telangiectasia mutated, ATC, ATD, ATDC, ATE, ATM serine/threonine kinase, C030026E19RIK, TEL1, TELO1                                                                                                                                                                                                                                                                                                                                                                                                                                                                                                                                                |
| ATP                                        | [[[(2R,3S,4R,5R)-5-(6-aminopurin-9-yl)-3,4-dihydroxyoxolan-2-yl]]methoxy-hydroxyphosphoryl] phosphono hydrogen phosphate, 56-65-5, 9-beta-D-arabinofuranosyladenine 5'-triphosphate, 9-beta-D-arabinofuranosyladenine 5'-triphosphate, adenosine 5'-(tetrahydrogen triphosphate), adenosine 5'-triphosphate, ATP, ATP4-, C10H16N5O13P3                                                                                                                                                                                                                                                                                                                                         |
| ATR                                        | ataxia telangiectasia and Rad3 related, Ataxia-telangiectasia-like, ATR serine/threonine kinase, FCTCS, FRP1, LOC100365674, LOC367198, LOC684113, MEC1, SCKL, SCKL1                                                                                                                                                                                                                                                                                                                                                                                                                                                                                                            |
| AURKA                                      | AI, AIK, AIK1, Ar, ARK-1, Au, AU019385, AURA, AURORA 2, AURORA A, AURORA KINASE, aurora kinase A, Aurora Related Kinase1, AW539821, Ayk, Ayk1, BTAk, I, IA, IAK, IAK1, PPP1R47, Stk, STK15, STK6, STK7                                                                                                                                                                                                                                                                                                                                                                                                                                                                         |
| AXIN1                                      | AI316800, AXIN, AXIN form I, Fu, fused, Kb, Ki, kinky, knobbly, PPP1R49                                                                                                                                                                                                                                                                                                                                                                                                                                                                                                                                                                                                        |
| BAD                                        | AI325008, Bad v1, Bad v2, BBC2, BCL2-associated agonist of cell death, BCL2L8                                                                                                                                                                                                                                                                                                                                                                                                                                                                                                                                                                                                  |
| BAK1                                       | Ba, BAK, BAK-LIKE, BCL2-antagonist/killer 1, BCL2L7, CDN1, N-B, N-BAK1                                                                                                                                                                                                                                                                                                                                                                                                                                                                                                                                                                                                         |
| BAX                                        | Bcl2-associated X, BCL2 associated X, apoptosis regulator, BCL2-associated X protein, BCL2L4                                                                                                                                                                                                                                                                                                                                                                                                                                                                                                                                                                                   |
| BBG3                                       | BCL2 binding component 3, JFY-1, PU, PUMA, PUMA/JFY1                                                                                                                                                                                                                                                                                                                                                                                                                                                                                                                                                                                                                           |
| BCL2                                       | AW986256, B cell leukaemia/lymphoma 2, B cell leukemia/lymphoma 2, Bcl-, Bcl2 alpha, BCL2 apoptosis regulator, BCL2, apoptosis regulator, Bcl2 $\alpha$ , C430015F12Rik, D630044D05RIK, D830018M01RIK, LOC100046608, ORF16, PPP1R50                                                                                                                                                                                                                                                                                                                                                                                                                                            |
| BCL2L1                                     | bBclx1, Bcl, BCL2L BCL2-like 1, BCLX, Bcl-X beta, Bclx gamma, BCL-XL/S, Bcl-X $\beta$ , Bclx $\gamma$ , PPP1R52                                                                                                                                                                                                                                                                                                                                                                                                                                                                                                                                                                |
| BCL2L11                                    | 1500006F24RIK, BAm, BCL2 like 11, BCL2-like 11 (apoptosis facilitator), Bi, BIM, Bo, BOD, BODL, LOC150819                                                                                                                                                                                                                                                                                                                                                                                                                                                                                                                                                                      |
| BMP                                        | BMP3, BMP-3A, BONE MORPHOGENIC, Osteogenin                                                                                                                                                                                                                                                                                                                                                                                                                                                                                                                                                                                                                                     |
| BMPR2                                      | 2610024H22RIK, AL117858, AW546137, BB189135, BM, BMP-, BMP-2, BMPR3, BMPR-II, BMR2, bone morphogenetic protein receptor type 2, bone morphogenetic protein receptor, type II (serine/threonine kinase), BRK-3, Gm20272, POVD1, PPH1, T-ALK, Type II bmp receptor                                                                                                                                                                                                                                                                                                                                                                                                               |
| BRAF                                       | 9930012E13RIK, AA120551, AA387315, AA473386, AA47469, Bra, B-RAF1, Braf-2, B-Raf proto-oncogene, serine/threonine kinase, Braf transforming gene, C230098H17, C87398, D6Etd631, D6Eitd631e, NS7, RAFB, RAFB1                                                                                                                                                                                                                                                                                                                                                                                                                                                                   |
| BRCA1                                      | BRCA1 DNA repair associated, BRCA1, DNA repair associated, BRCAI, BRCC1, breast cancer 1, early onset, BROVCA1, FANCS, PNCA4, PPP1R53, PSCP, RNF53                                                                                                                                                                                                                                                                                                                                                                                                                                                                                                                             |
| c-lap                                      | IAP, NAIP                                                                                                                                                                                                                                                                                                                                                                                                                                                                                                                                                                                                                                                                      |
| Ca2+                                       | 14127-61-8, Ca+2, calcium, calcium(2+), calcium cation, calcium citrate, calcium ion, calcium, ion (Ca2+), calcium ions, Citracal, tricalcium dicitrate                                                                                                                                                                                                                                                                                                                                                                                                                                                                                                                        |
| CaMKII                                     | Ca2+/CALMODULIN DEPENDENT KINASE II, Ca+/calmodulin-dependent protein kinase ii, calmodulin-dependent protein kinase 2, Calmodulin Kinase II, CAMK2, CaM Kinase II, Ccdp k ii                                                                                                                                                                                                                                                                                                                                                                                                                                                                                                  |
| cAMP                                       | 11002-78-1, 33116-15-3, 3',5'-cyclic AMP, 3',5'-monophosphate, adenosine cyclic, 37839-81-9, (4aR,6R,7R,7aS)-6-(6-aminopurin-9-yl)-2-hydroxy-2-oxo-4a,6,7,7a-tetrahydro-4H-furo[3,2-d][1,3,2]dioxaphosphinin-7-ol, 54532-48-8, 55576-98-2, 60-92-4, 60667-13-8, 68407-13-6, adenosine 3',5'-phosphate, adenosine, cyclic 3',5'-(hydrogen phosphate), adenosine cyclic 3,5 monophosphate, adenosine cyclic 3',5'-monophosphate, adenosine cyclic monophosphate, adenosine cyclic monophosphate, adenosine, cyclic adenylic acid, cyclic AMP, disodium salt, cyclic AMP, monoammonium salt, cyclic AMP, monopotassium salt, cyclic AMP, monosodium salt, cyclic AMP, sodium salt |
| CASP3/6/7                                  | CASP3/6/7, Caspase 3, 6, 7, Caspase-3, -6, and -7                                                                                                                                                                                                                                                                                                                                                                                                                                                                                                                                                                                                                              |
| CASP9                                      | AI115399, APAF-3, AW493809, Casp, Casp9 v1, Caspase-9, ICE-, ICE-LAP6, MCH6, PPP1R56                                                                                                                                                                                                                                                                                                                                                                                                                                                                                                                                                                                           |
| Caspase8/10                                | Casp8/10, Caspase 8,10                                                                                                                                                                                                                                                                                                                                                                                                                                                                                                                                                                                                                                                         |
| CBL                                        | 4732447J05RIK, Casitas B-lineage lymphoma, CBL2, CBLA, Cbl proto-oncogene, Cbl ubiquitin ligase, c-Cb, C-CBL, FRA11B, LOC283153, NSLL, p120 Cbl, RGD1561386, RNF55                                                                                                                                                                                                                                                                                                                                                                                                                                                                                                             |
| CNDN1                                      | AI327039, B-CELL CLL/LLYMPHOMA 1, bcl-, BCL1, cD1, CycD1, CYCLIN D1, Cyl-, Cyl-1, D11S287E, G1/S-Specific Cyclin D1, PR, PRAD1, U21B31                                                                                                                                                                                                                                                                                                                                                                                                                                                                                                                                         |
| Cd2+                                       | 22537-48-0, cadmium(2+), cadmium acetate, cadmium cation, cadmium ion, cadmium, ion (Cd2+), Cd+2                                                                                                                                                                                                                                                                                                                                                                                                                                                                                                                                                                               |
| CDC25                                      | mRNA encoding Cdc25-like                                                                                                                                                                                                                                                                                                                                                                                                                                                                                                                                                                                                                                                       |
| CDC42                                      | AI747189, AU018915, CDC42Hs, cell division cycle 42, CELLULAR GROWTH REGULATING, G25K, TKS                                                                                                                                                                                                                                                                                                                                                                                                                                                                                                                                                                                     |
| CDH1                                       | AA960649, ARC-1, BCDS1, cadherin 1, Cadherin E, CD324, CDHE, CSEIL, E-ca, ECAD, E-cadh, E-cadherin, L-C, L-CAM, Um, UVO, uvomorulin                                                                                                                                                                                                                                                                                                                                                                                                                                                                                                                                            |
| CDK                                        | Cdks, cyclin-dependent kinase, Cyclin-Dependent Kinases, G1 CDK                                                                                                                                                                                                                                                                                                                                                                                                                                                                                                                                                                                                                |
| CDK2                                       | A630093N05RIK, CDC2-RELATED KINASE, CDKN2, Cyclin A associated kinase, cyclin-dependent kinase 2, CYCLIN E ASSOCIATED KINASE, p33(CDK2)                                                                                                                                                                                                                                                                                                                                                                                                                                                                                                                                        |
| CDK2-CyclinE                               | Cyclin E-CDK2                                                                                                                                                                                                                                                                                                                                                                                                                                                                                                                                                                                                                                                                  |
| CDKN1A                                     | CAP, CAP20, CDK, CDK1, Cdkn, CDKN1, CDKN1A, Ci, CIP1, cyclin-dependent kinase inhibitor 1A, cyclin-dependent kinase inhibitor 1A (P21), mda, MDA-6, P2, P21, p21C, p21Cip, p21CIP1, p21W, p21WAF, p21Waf1, P21 Cyclin-Dependent Kinase Inhibitor, SD, SDI1, UV96, WAF, WAF1                                                                                                                                                                                                                                                                                                                                                                                                    |
| CDKN1B                                     | AA408329, AI843786, Cdk1b, CDKN4, cyclin-dependent kinase inhibitor 1B, CYCLIN-DEPENDENT KINASE INHIBITOR P27, KIP1, MEN1B, MEN4, p2, p27, p27K, P27kip, P27KIP1, P28-ICK                                                                                                                                                                                                                                                                                                                                                                                                                                                                                                      |
| CDKN2A                                     | A, Arf, ARF-INK4a, CDK4I, CDKN2, CMM2, CYCLIN-DEPENDENT KINASE INHIBITOR 2A, INK4, INK4A, INK4a-ARF, Ink4a/Arf, MLM, MTS, MTS-1, p1, p14ARF/p16INK4a, p16, p16/ARF, p16Cdkn2a, p16l, p16 INK4, p16l INK4a, P19, p19ARF, Pct, PCTR1, TP16                                                                                                                                                                                                                                                                                                                                                                                                                                       |
| CDKN2B                                     | AV083695, CDK4I, cyclin-dependent kinase inhibitor 2B, INK4B, MTS, MTS2, p1, P15, p15IN, p15INK4, p15INK4b, p15(INK4b)                                                                                                                                                                                                                                                                                                                                                                                                                                                                                                                                                         |
| CDKN2C                                     | C77269, CDKN6, cyclin-dependent kinase inhibitor 2C, INK, INK4C, p1, p18, p18IN, p18-INK4C, p18-INK6                                                                                                                                                                                                                                                                                                                                                                                                                                                                                                                                                                           |
| CDKN2D                                     | cyclin dependent kinase inhibitor 2D, INK, INK4D, p1, p19, p19IN, p19-INK4D                                                                                                                                                                                                                                                                                                                                                                                                                                                                                                                                                                                                    |
| CFLAR                                      | 2310024N18RIK, AA30105C05RIK, AU021929, Ca, CASH, CASP8 and FADD-like apoptosis regulator, CASP8AP1, Caspase 8 associated, Casper, c-F, c-FLIP, CLARP, F, FLAME, FLAME-1, FLICE-LIKE IP, FLIP, Gm9845, I-FLICE, LOC102724614, MRIT                                                                                                                                                                                                                                                                                                                                                                                                                                             |
| CHEK1                                      | C85740, checkpoint kinase 1, CHK1, rad27                                                                                                                                                                                                                                                                                                                                                                                                                                                                                                                                                                                                                                       |
| CHEK2                                      | CDS1, Check2, checkpoint kinase 2, CHK2, hCds1, HUCD51, LFS2, PP1425, Rad, RAD53                                                                                                                                                                                                                                                                                                                                                                                                                                                                                                                                                                                               |
| CREBBP                                     | AW558298, CB, CBP, CBP/p300, CREB binding protein, KAT, KAT3A, MKHK1, p300/CBP, RSTS, RSTS1, RTS                                                                                                                                                                                                                                                                                                                                                                                                                                                                                                                                                                               |
| CRK                                        | c-Crk, c-Crk2, Cr, CRK2, Crko, CRK proto-oncogene, adaptor protein, FLJ11558, p38, v-crk avian sarcoma virus CT10 oncogene homolog                                                                                                                                                                                                                                                                                                                                                                                                                                                                                                                                             |
| CTNNB1                                     | armadillo, Beta-cat, beta CATENIN, Bfc, Cat, CATENIN beta, catenin beta 1, catenin (cadherin associated protein), beta 1, catenin (cadherin associated protein), $\beta$ 1, CATENIN $\beta$ , catenin $\beta$ 1, CATNB, CTNB1, CTNNB, CTNN beta, CTNN $\beta$ , EVR7, Mesc, MRD19, NEDSDV, $\beta$ -cat, $\beta$ -catenin                                                                                                                                                                                                                                                                                                                                                      |
| CTNND1                                     | AA409437, AU019353, BCDS2, Ca, Cas, catenin (cadherin associated protein), delta 1, catenin (cadherin associated protein), $\delta$ 1, catenin delta 1, catenin $\delta$ 1, CATNS, Ctn, CTNN, CTNN delta, CTNN delta1, CTNN $\delta$ , CTNN $\delta$ , mKIAA0384, P12, P120, P120CAS, p120(CAS), p120-Catenin, P120CTN, p120(CTN), Pp120                                                                                                                                                                                                                                                                                                                                       |
| CTNN $\alpha$ -CTNN $\beta$ -CTNN $\delta$ | CTNNalpha-CTNNbeta-CTNNdelta                                                                                                                                                                                                                                                                                                                                                                                                                                                                                                                                                                                                                                                   |
| CyclinD                                    | CycD, Cyclin D1                                                                                                                                                                                                                                                                                                                                                                                                                                                                                                                                                                                                                                                                |
| CYCS                                       | CYC, CYCSA, CYTC, CYTOC, CYTOCHROME C, cytochrome c, somatic, cytochrome c, somatic-like, ENSMUSG0000058927, HCS, LOC100363502, THC4, X laevis XLCL2                                                                                                                                                                                                                                                                                                                                                                                                                                                                                                                           |
| DAG                                        | DAG, diacylglycerides, diglyceride                                                                                                                                                                                                                                                                                                                                                                                                                                                                                                                                                                                                                                             |
| DAXX                                       | BING2, DAP6, death-domain associated protein, EAP1, Fas death domain-associated protein, PML ASSOCIATED FACTOR                                                                                                                                                                                                                                                                                                                                                                                                                                                                                                                                                                 |
| DIABLO                                     | 0610041G12RIK, 1700006L01RIK, AU040403, DFNA64, diablo IAP-binding mitochondrial protein, diablo, IAP-binding mitochondrial protein, Sm, SMAC                                                                                                                                                                                                                                                                                                                                                                                                                                                                                                                                  |
| DVL1                                       | DISHEVELED, dishevelled segment polarity protein 1, DRS2, DSH, DVL, DVL1L1, DVL1P1, mKIAA4029                                                                                                                                                                                                                                                                                                                                                                                                                                                                                                                                                                                  |
| ELK1                                       | ELK, ELK1, member of ETS oncogene family, ETS transcription factor ELK1, p62TCF, RGD:2549, TCF/ELK                                                                                                                                                                                                                                                                                                                                                                                                                                                                                                                                                                             |
| EP300                                      | A430090G16, A730011L11, E1A binding protein p300, KAT3, KAT3B, MKHK2, p30, p300, p300 HAT, RSTS2                                                                                                                                                                                                                                                                                                                                                                                                                                                                                                                                                                               |
| ERK1/2                                     | MAPK p44/42, MAPK p44/p42, p42/44 mapk, P42/p44 erk, P42/p44 mapk, p42/p44 MAP KINASE                                                                                                                                                                                                                                                                                                                                                                                                                                                                                                                                                                                          |
| FADD                                       | DEATH domain-containing ADAPTOR, Fas associated via death domain, Fas (TNFRSF6)-associated via death domain, GIG3, MORT1, Mort1/F, Mort1/FADD                                                                                                                                                                                                                                                                                                                                                                                                                                                                                                                                  |
| FANCD2                                     | 2410150007RIK, AU015151, BB137857, FA4, FACD, FA complementation group D2, FAD, FA-D2, FANCD, Fanconi anaemia, complementation group D2, Fanconi anemia, complementation group D2                                                                                                                                                                                                                                                                                                                                                                                                                                                                                              |
| FAS                                        | AI196731, ALPS1A, AP, APO-1, APT1, CD95, CD95L, CD95 receptor, FAS1, FAS/APO1, Fas cell surface death receptor, FasR, FASTM, Fas (TNF receptor superfamily member 6), Ipr, Receptor for Fas Ligand, Receptors for Fas Ligand, TNF, Tnfr, TNFR6, Tnf receptor member 6, TNFRSF6                                                                                                                                                                                                                                                                                                                                                                                                 |
| FASLG                                      | ALPS1B, APT1, APT1LG1, APTL, CD178, CD95, CD95-L, F, Fa, FASL, Fas Ligand, Fas ligand (TNF superfamily, member 6), gld, mFasL, Tnfr6, Tnfs, TNFSF6, TNLG1A                                                                                                                                                                                                                                                                                                                                                                                                                                                                                                                     |
| FOS                                        | AP-1, c-, C-FOS, D12Rfj, D12Rfj, FBJ osteosarcoma oncogene, Fos proto-oncogene, AP-1 transcription factor subunit, p55                                                                                                                                                                                                                                                                                                                                                                                                                                                                                                                                                         |
| FOXO1                                      | Afx, Afxh, AI876417, FKX, FKH1, FKHR, FKHR1, Forkhead, forkhead box O1, Fox, FOXO1A                                                                                                                                                                                                                                                                                                                                                                                                                                                                                                                                                                                            |
| Frizzled                                   | Frizzled receptor, FZ, FZD, Wnt receptor                                                                                                                                                                                                                                                                                                                                                                                                                                                                                                                                                                                                                                       |
| Frizzled-LRP                               | FZD-LRP1/5/6                                                                                                                                                                                                                                                                                                                                                                                                                                                                                                                                                                                                                                                                   |
| FYN                                        | AI448320, AW552119, C-FYN, Fyn proto-oncogene, FYN proto-oncogene, Src family tyrosine kinase, FYNT, LOC102724705, p59-FYN, p59 Fyn B, SLK, SRC-LIKE KINASE, SYN                                                                                                                                                                                                                                                                                                                                                                                                                                                                                                               |
| G protein                                  | Galphabeta-gamma, Galpha-Gbeta-Ggamma, Galpha-Gbeta-Ggamma, Galpha-Gbeta-Ggamma, Gpro, G protein alpha beta gamma, G protein alpha-G protein beta-GDP-G protein gamma, G protein alpha-G protein beta-G protein gamma, G-protein complex, G protein $\alpha$ -G protein $\beta$ -GDP-G protein $\gamma$ , G protein $\alpha$ -G protein $\beta$ -G protein $\gamma$ , G-protein $\alpha$ - $\beta$ - $\gamma$ , Guanine nucleotide binding protein, Ga-G $\beta$ -G $\gamma$ , Gai-G $\beta$ -G $\gamma$ , Gaq-G $\beta$ -G $\gamma$ , Go $\beta$                                                                                                                              |
| G proteinalpha                             | Galpha, G-Protein Alpha Subunit, G protein $\alpha$ , G-Protein $\alpha$ Subunit, Ga                                                                                                                                                                                                                                                                                                                                                                                                                                                                                                                                                                                           |
| Gammasecretase                             | Gamma Secretase, Secretase $\gamma$ , $\gamma$ -Secretase                                                                                                                                                                                                                                                                                                                                                                                                                                                                                                                                                                                                                      |
| GLI1                                       | AV235269, GL1, GLI, GLI family zinc finger 1, GLI-Kruppel family member GLI1, PAPA8, PPD1, Zfp-, ZFP5                                                                                                                                                                                                                                                                                                                                                                                                                                                                                                                                                                          |
| GRB2                                       | AA408164, ASH, Ash-psi, EGFRBP-GRB2, GRAB2, GRBS, growth factor receptor bound protein 2, MST084, MSTP084, NCKAP2                                                                                                                                                                                                                                                                                                                                                                                                                                                                                                                                                              |
| Grb2-Shc1-Sos                              | Grb2-Sos-Shc, SHC-GRB2-SOS                                                                                                                                                                                                                                                                                                                                                                                                                                                                                                                                                                                                                                                     |
| GSK3                                       | Glycogen synthase kinase, Gsk, GSK3 alpha/beta, GSK3 $\alpha/\beta$                                                                                                                                                                                                                                                                                                                                                                                                                                                                                                                                                                                                            |
| GSK3beta-Axin-APC-CTnnbeta                 | APC-CTNNbeta-Axin-GSK3beta, APC-CTNN $\beta$ -Axin-GSK3 $\beta$ , Axin-APC-GSKbeta-CTNNbeta, Axin-APC-GSK $\beta$ -CTNN $\beta$ , GSK3 $\beta$ -Axin-APC-CTNN $\beta$                                                                                                                                                                                                                                                                                                                                                                                                                                                                                                          |
| GSK3B                                      | 7330414F15RIK, 8430431H08RIK, C86142, glycogen synthase kinase 3 beta, glycogen synthase kinase 3 $\beta$ , GSK-, GSK-3, GSK-3be, GSK-3beta, GSK-3 $\beta$ , GSKbeta, GSK $\beta$ , Tpk1                                                                                                                                                                                                                                                                                                                                                                                                                                                                                       |
| HAT1                                       | 2410071B14RIK, AA536933, histone acetyltransferase 1, histone aminotransferase 1, KAT, KAT1                                                                                                                                                                                                                                                                                                                                                                                                                                                                                                                                                                                    |
| Hedgehog                                   | Hh                                                                                                                                                                                                                                                                                                                                                                                                                                                                                                                                                                                                                                                                             |
| HIF1A                                      | AA959795, bHLHe7, bHLHe78, HIF-1, HIF1-ALPHA, HIF-1alpha (hydroxylated), HIF-1 $\alpha$ , HIF-1 $\alpha$ (hydroxylated), Hypoxia inducible factor 1 alpha subunit, hypoxia inducible factor 1, alpha subunit, hypoxia inducible factor 1 subunit alpha, hypoxia inducible factor 1 subunit $\alpha$ , Hypoxia inducible factor 1 $\alpha$ subunit, hypoxia inducible factor 1, $\alpha$ subunit, MO, MOP1, PADS8                                                                                                                                                                                                                                                               |

| Symbol                         | Synonym(s)                                                                                                                                                                                                                                                                                                                                                                                                                                                                                                                                                                                                                                                                                                                                                      |
|--------------------------------|-----------------------------------------------------------------------------------------------------------------------------------------------------------------------------------------------------------------------------------------------------------------------------------------------------------------------------------------------------------------------------------------------------------------------------------------------------------------------------------------------------------------------------------------------------------------------------------------------------------------------------------------------------------------------------------------------------------------------------------------------------------------|
| HIF1alpha-NICD                 | HIF1α-NICD                                                                                                                                                                                                                                                                                                                                                                                                                                                                                                                                                                                                                                                                                                                                                      |
| HIPK2                          | 1110014020RIK, B230339E18RIK, homeodomain interacting protein kinase 2, LOC100505582, LOC653052, PRO0593, St, Stank                                                                                                                                                                                                                                                                                                                                                                                                                                                                                                                                                                                                                                             |
| Ikb                            | I KAPPA B, Ikbeta, IκB, Iκ-B                                                                                                                                                                                                                                                                                                                                                                                                                                                                                                                                                                                                                                                                                                                                    |
| IκB-NfκB                       | IκappaB-NFκappaB, IκB-NFκB, NFκB-IκB                                                                                                                                                                                                                                                                                                                                                                                                                                                                                                                                                                                                                                                                                                                            |
| Integrin                       | Integrin alpha-beta, integrin-extracellular matrix, INTEGRIN receptor, Integrin α-β                                                                                                                                                                                                                                                                                                                                                                                                                                                                                                                                                                                                                                                                             |
| IP3                            | 27121-73-9, inositol trisphosphate, IP3, myo-inositol, tris(dihydrogen phosphate)                                                                                                                                                                                                                                                                                                                                                                                                                                                                                                                                                                                                                                                                               |
| IRS1                           | ENSMUSG00000022591, G972, G972R, HIRS-1, insulin receptor substrate 1, IR, IRS1IRM                                                                                                                                                                                                                                                                                                                                                                                                                                                                                                                                                                                                                                                                              |
| JAK                            | JAK kinase                                                                                                                                                                                                                                                                                                                                                                                                                                                                                                                                                                                                                                                                                                                                                      |
| Jnk                            | JNK 54/46, Jnk p56, JNK/SAPK, JUN KINASE, p40, p47, Sapk/Jnk                                                                                                                                                                                                                                                                                                                                                                                                                                                                                                                                                                                                                                                                                                    |
| JUN                            | Activator protein 1, AP-1, API-1, c-jun, cJUN, Junc, jun proto-oncogene, Jun proto-oncogene, AP-1 transcription factor subunit, LOC100288387, LOC100291417, LOC100293034, p39, v-Jun, V-jun Avian Sarcoma Virus 17 Oncogene Homolog, V-jun Sarcoma Virus 17 Oncogene Homolog                                                                                                                                                                                                                                                                                                                                                                                                                                                                                    |
| LAMTOR3                        | AW556229, late endosomal/lysosomal adaptor, MAPK and MTOR activator 3, LOC100132990, Map, Map2k, MAP2K1IP1, MAPBP, MAPKSP1, Mek binding partner 1, Mp, MP1, PRO0633, Regulator3                                                                                                                                                                                                                                                                                                                                                                                                                                                                                                                                                                                 |
| LEF1                           | 3000002B05, A1451430, Lef-, lymphoid enhancer binding factor 1, TCF10, TCF1ALPHA, TCF7L3, TCF/LEF                                                                                                                                                                                                                                                                                                                                                                                                                                                                                                                                                                                                                                                               |
| MAP2K1/2                       | MEK1/2, MKK1/2                                                                                                                                                                                                                                                                                                                                                                                                                                                                                                                                                                                                                                                                                                                                                  |
| MAP3K5                         | 7240542D20RIK, A, APOPTOSIS SIGNAL REGULATED KINASE 1, AS, ASK, ASK1, M3K5, MAPKKK5, MEKK5, mitogen-activated protein kinase kinase kinase 5, RGD1306565                                                                                                                                                                                                                                                                                                                                                                                                                                                                                                                                                                                                        |
| MAP3K7                         | CSCF, FMD2, Map3k7 predicted, MEKK7, mitogen-activated protein kinase kinase kinase 7, TAK1, TGF1a, tgf β activated kinase 1                                                                                                                                                                                                                                                                                                                                                                                                                                                                                                                                                                                                                                    |
| Map3k7-Map3k7ip1-              | Tab1-Tab2-Tak1                                                                                                                                                                                                                                                                                                                                                                                                                                                                                                                                                                                                                                                                                                                                                  |
| MAX                            | AA960152, A1875693, bHLHd, bHLHd4, bHLHd5, bHLHd6, bHLHd7, bHLHd8, Max protein, MYC associated factor X, Myn                                                                                                                                                                                                                                                                                                                                                                                                                                                                                                                                                                                                                                                    |
| Max-Myc                        | cMyc-MAX, Myc-MAX                                                                                                                                                                                                                                                                                                                                                                                                                                                                                                                                                                                                                                                                                                                                               |
| MDM2                           | 1700007J15Rik, AA415488, ACTFS, hdm2, HDMX, LSKB, MDM2-A1, MDM2 proto-oncogene, MGC5370, Transformed 3T3 cell double minute 2, transformed mouse 3T3 cell double minute 2                                                                                                                                                                                                                                                                                                                                                                                                                                                                                                                                                                                       |
| Mkk3/6                         | MEK3/6, MKK3/6 (mitogen activated protein kinase kinase 3/6), MKK3/MKK6                                                                                                                                                                                                                                                                                                                                                                                                                                                                                                                                                                                                                                                                                         |
| MYC                            | AU016757, bHLHe3, bHLHe39, CMYC, C-MYC-P64, mMyc, MRTL, Myc2, MYCC, MYC proto-oncogene, bHLH transcription factor, myelocytomatosis oncogene, N, Niard, Nird, RNCMYC                                                                                                                                                                                                                                                                                                                                                                                                                                                                                                                                                                                            |
| NBN                            | ATV, AT-V1, AT-V2, Nb, NBS, NBS1, NIBRIN, P95                                                                                                                                                                                                                                                                                                                                                                                                                                                                                                                                                                                                                                                                                                                   |
| NCSTN                          | 9430068N19RIK, AA727311, APH2, ATAG1874, D1Dau13, D1Dau13e, Kiaa0253, mKIAA0253, Nc, NCT, ni, NICASTRIN                                                                                                                                                                                                                                                                                                                                                                                                                                                                                                                                                                                                                                                         |
| NF1                            | AW494271, Dsk, Dsk9, E030030H24RIK, LOC646021, Mhdads, Mhdadsk9, Neurofibromatosis 1, NEUROFIBROMIN, neurofibromin 1, Nf-, NF1-GAP, NFNS, VRNF, WSS                                                                                                                                                                                                                                                                                                                                                                                                                                                                                                                                                                                                             |
| NFκB                           | NF-KAPPA B, NF-κ B, nuclear factor-κ b, transcription factor nuclear factor κ b                                                                                                                                                                                                                                                                                                                                                                                                                                                                                                                                                                                                                                                                                 |
| NLK                            | A1194375, LOC100044468, nemo like kinase, RGD1561602                                                                                                                                                                                                                                                                                                                                                                                                                                                                                                                                                                                                                                                                                                            |
| NOTCH1                         | 9930111A19RIK, AOS5, AOVd1, hN1, lin, lin-12, Mi, Mis6, N, N1, NOTCH1, notch receptor 1, Ta, TAN1                                                                                                                                                                                                                                                                                                                                                                                                                                                                                                                                                                                                                                                               |
| p38MAPK                        | P38, p38 MAP KINASE, P38 MITOGEN-ACTIVATED protein KINASE                                                                                                                                                                                                                                                                                                                                                                                                                                                                                                                                                                                                                                                                                                       |
| Patched                        | PTC, PTCH                                                                                                                                                                                                                                                                                                                                                                                                                                                                                                                                                                                                                                                                                                                                                       |
| PI3K                           | 1-phosphatidylinositol 3-kinase, 2.7.1.137, ATP:1-phosphatidyl-1D-myo-inositol 3-phosphotransferase, Phosphatidylinositol 3 kinase, phosphatidylinositol 3'-kinase, PI3-kinase, PtdIns 3 Kinase, type III phosphoinositide 3-kinase, type I phosphatidylinositol kinase, Vps34p                                                                                                                                                                                                                                                                                                                                                                                                                                                                                 |
| PIP2                           | 1,2-diacyl-sn-glycero-(1'-myo-inositol-4',5'-bisphosphate), 1-O-(3-sn-phosphatidyl)-1D-myo-inositol 4,5-bis(dihydrogen phosphate), 1-phosphatidyl-1D-myo-inositol 4,5-bisphosphate, C11H19O19P3R2                                                                                                                                                                                                                                                                                                                                                                                                                                                                                                                                                               |
| PIP3                           | 1-phosphatidyl-1D-myo-inositol 3,4,5-trisphosphate, phosphatidylinositol 3,4,5-trisphosphate, phosphoinositide (3,4,5) P3, PI(3,4,5)P3, Plns(3,4,5)P3, PIP3, PtdIns(3,4,5)P3                                                                                                                                                                                                                                                                                                                                                                                                                                                                                                                                                                                    |
| PKA                            | A-Kinase, cAMP-Dependent Protein Kinase, cyclic AMP depended protein kinase, protein KINASE A                                                                                                                                                                                                                                                                                                                                                                                                                                                                                                                                                                                                                                                                   |
| PKC                            | Cnpkc, PKC, Pkc(s), Protein Kinase C                                                                                                                                                                                                                                                                                                                                                                                                                                                                                                                                                                                                                                                                                                                            |
| Plcbeta                        | Phospholipase c beta, Phospholipase C β, PLCB, PLCβ                                                                                                                                                                                                                                                                                                                                                                                                                                                                                                                                                                                                                                                                                                             |
| PMAIP1                         | APR, N, NOXA, phorbol-12-myristate-13-acetate-induced protein 1                                                                                                                                                                                                                                                                                                                                                                                                                                                                                                                                                                                                                                                                                                 |
| Presenilin                     | PS, PS1/2, PSEN1/2                                                                                                                                                                                                                                                                                                                                                                                                                                                                                                                                                                                                                                                                                                                                              |
| PRKDC                          | A1326420, AU019811, DNA-, DNA-DEPENDENT protein KINASE, DNAPDCs, DNAPK, DNA-PKC, DNA-PKcs, DNPK1, DOX, DOXNPH, dxn, dxnph, HYRC, HYRC1, IMD26, p350, p460, Prkdc predicted, protein kinase, DNA activated, catalytic polypeptide, protein kinase, DNA-activated, catalytic subunit, scid, slip, XRCC, XRCC7                                                                                                                                                                                                                                                                                                                                                                                                                                                     |
| PSENE1                         | 1700023M09RIK, ACNIN2, MDS033, MSTP064, PEN-2, presenilin enhancer gamma secretase subunit, presenilin enhancer, gamma-secretase subunit, presenilin enhancer γ secretase subunit, presenilin enhancer, γ-secretase subunit, RGD1312037                                                                                                                                                                                                                                                                                                                                                                                                                                                                                                                         |
| PTCH1                          | A230106A15RIK, BCNS, mes, NBCCS, patched 1, Pt, PTC, PTC1, PTCH, Ptch2, wi, wig                                                                                                                                                                                                                                                                                                                                                                                                                                                                                                                                                                                                                                                                                 |
| PTK2                           | FA, Fad, FADK, FADK 1, FAK, FAK1, FAK related non-kinase, FR, p125FAK, pp125FAK, PPP1R71, protein tyrosine kinase 2, PTK2 protein tyrosine kinase 2, TYROSINE KINASE 2                                                                                                                                                                                                                                                                                                                                                                                                                                                                                                                                                                                          |
| PTPN11                         | 2700084A17RIK, AW536184, BPTP3, CFC, JMML, METCDS, MGC14433, Noonan syndrome 1, NS1, protein tyrosine phosphatase non-receptor type 11, protein tyrosine phosphatase, non-receptor type 11, PTP, PTP-1D, PTP2C, S, SAP-2, Sh, SH-P, SHP-2, SH-PTP2, SH-PTP3, Src homology protein 2, SYP                                                                                                                                                                                                                                                                                                                                                                                                                                                                        |
| RAF1                           | 6430402F14RIK, AA990557, BB129353, CMD1NN, c-R, Cra, CRAF, Craf1, D830050J10RIK, leukaemia ONCOGENE HOMOLOG1, LEUKEMIA ONCOGENE HOMOLOG1, NS5, Raf-1 proto-oncogene, serine/threonine kinase, v-, v-Raf, v-raf-leukaemia viral oncogene 1, v-raf-leukemia viral oncogene 1                                                                                                                                                                                                                                                                                                                                                                                                                                                                                      |
| Ral                            | Ral A/B                                                                                                                                                                                                                                                                                                                                                                                                                                                                                                                                                                                                                                                                                                                                                         |
| RALBP1                         | DNP-SG ATPase, R, ralA binding protein 1, Ral GAP, Rik, RIP1, RL, RLIP1, RLIP76                                                                                                                                                                                                                                                                                                                                                                                                                                                                                                                                                                                                                                                                                 |
| RALGDS                         | Gn, Gnds, Hs.560937, mKIAA1308, Ra, RalGDSB, RalGEF, ral guanine nucleotide dissociation stimulator, Rg, RGDS, RGF                                                                                                                                                                                                                                                                                                                                                                                                                                                                                                                                                                                                                                              |
| RAPGEF1                        | 4932418O06RIK, C3G, C3G-1, C3G-2, Grf, GRF2, Rap guanine nucleotide exchange factor 1, Rap guanine nucleotide exchange factor (GEF) 1                                                                                                                                                                                                                                                                                                                                                                                                                                                                                                                                                                                                                           |
| RAPGEF3                        | 2310016P22RIK, 9330170P05RIK, bcm910, CAMP-GEFI, CGEF1, Epa, EPAC, EPAC1, HSU79275, Rap guanine nucleotide exchange factor 3, Rap guanine nucleotide exchange factor (GEF) 3                                                                                                                                                                                                                                                                                                                                                                                                                                                                                                                                                                                    |
| Ras-grf                        | Guanine Nucleotide Releasing                                                                                                                                                                                                                                                                                                                                                                                                                                                                                                                                                                                                                                                                                                                                    |
| RASA1                          | CM-AVM, CMAVM1, G, GAP, GAPX, p120-, p120GAP, P120RASGAP, PKWS, RASA, RASGAP, RAS p21 protein activator 1                                                                                                                                                                                                                                                                                                                                                                                                                                                                                                                                                                                                                                                       |
| RASGRP1                        | CALDAG-GEFI, CALDAG-GEFII, IMD64, RASGRP, RAS guanyl releasing protein 1                                                                                                                                                                                                                                                                                                                                                                                                                                                                                                                                                                                                                                                                                        |
| Rb-E2Ftranscription repression | Rb1-E2F1, Rb-E2F, Rb-E2F1                                                                                                                                                                                                                                                                                                                                                                                                                                                                                                                                                                                                                                                                                                                                       |
| RB1                            | OSRC, p, p105, p105-Rb, p110 RB, p110-RB1, pp105, pp110, PPP1R130, pRb, R, RB, RB-ASSOCIATED, RB transcriptional corepressor 1, Retinoblastome tumor-suppression protein rb                                                                                                                                                                                                                                                                                                                                                                                                                                                                                                                                                                                     |
| RBL1                           | AW547426, CP107, LOC683869, p10, p107, PRB1, RB transcriptional corepressor like 1                                                                                                                                                                                                                                                                                                                                                                                                                                                                                                                                                                                                                                                                              |
| RBPJ                           | A1843960, AOS3, CBF-1, csl, Igg, Iggj, IGKJRB, IGKJRB1, Iggksbp, KBF2, RBP, RBP 2N, RBP-JK, RBP-J kappa, RBP-J κ, RBPSUH, Rbpsuh1, Recombination signal binding, recombination signal binding protein for immunoglobulin kappa J region, recombination signal binding protein for immunoglobulin κ J region, SUH                                                                                                                                                                                                                                                                                                                                                                                                                                                |
| RHO                            | GTPase Rho, Rho, Rho Family, RHO-GTPASE, Rho-like Gtpase                                                                                                                                                                                                                                                                                                                                                                                                                                                                                                                                                                                                                                                                                                        |
| SHC1                           | p52SHC, p6, p66, p66s, P66shc, Sh, SHC, Shc (46 kDa isoform), SHCA, SHC adaptor protein 1, Shc p66 isoform, src homology 2 domain-containing transforming protein C1                                                                                                                                                                                                                                                                                                                                                                                                                                                                                                                                                                                            |
| Smad1/5/8                      | SMAD1/5/8                                                                                                                                                                                                                                                                                                                                                                                                                                                                                                                                                                                                                                                                                                                                                       |
| Smad1/5/8-Smad2/3-             | SMAD 1,4,5,8                                                                                                                                                                                                                                                                                                                                                                                                                                                                                                                                                                                                                                                                                                                                                    |
| Smad2/3-                       | Smad 2/3/4                                                                                                                                                                                                                                                                                                                                                                                                                                                                                                                                                                                                                                                                                                                                                      |
| SMAD4                          | AW743858, D18Wsu70, D18Wsu70e, DPC, DPC4, J1P, Madh, MADH4, MYHRS, SMAD family member 4, Smaug1                                                                                                                                                                                                                                                                                                                                                                                                                                                                                                                                                                                                                                                                 |
| SMAD6                          | AOVD2, b2b390K, b2b390Clo, HsT17432, Madh, MADH6, MADH7, SMAD family member 6                                                                                                                                                                                                                                                                                                                                                                                                                                                                                                                                                                                                                                                                                   |
| SMAD7                          | CRC33, Madh, MADH7, MADH8, SMAD family member 7                                                                                                                                                                                                                                                                                                                                                                                                                                                                                                                                                                                                                                                                                                                 |
| SMO                            | bnb, CRJS, E130215L21RIK, FZD11, Gx, PHL5, SMOH, Smoothened, smoothened, frizzled class receptor                                                                                                                                                                                                                                                                                                                                                                                                                                                                                                                                                                                                                                                                |
| SRC                            | ASV, AW259666, B527, c-SRC, p60-Src, PP60, Pp60/c-Src, pp60c, pp60c-src, Rous sarcoma oncogene, SRC1, SRC proto-oncogene, non-receptor tyrosine kinase, THC6, TVHUSC                                                                                                                                                                                                                                                                                                                                                                                                                                                                                                                                                                                            |
| STK36                          | 1700112N14RIK, B930045J24, FU, Fuse, Fused, mKIAA1278, serine/threonine kinase 36, Stk36 (predicted)                                                                                                                                                                                                                                                                                                                                                                                                                                                                                                                                                                                                                                                            |
| SUFU                           | b2b273C, JBTS32, PRO1280, Su, SUFUH, SUFU negative regulator of hedgehog signaling, SUFUXL                                                                                                                                                                                                                                                                                                                                                                                                                                                                                                                                                                                                                                                                      |
| SYNGAP1                        | Gm1963, MRD5, RASA1, RASA5, Sy, Synaptic Ras-GAP 1, synaptic Ras GTPase activating protein 1, synaptic Ras GTPase activating protein (rat), SYNGAP                                                                                                                                                                                                                                                                                                                                                                                                                                                                                                                                                                                                              |
| TAB2                           | 1110030N06RIK, A530078N03RIK, CHTD2, LOC101928709, Map3k, MAP3K7IP2, mKIAA0733, RP1 111D63, TGF-beta activated kinase 1 (MAP3K7) binding protein 2, TGF-beta activated kinase 1/MAP3K7 binding protein 2, TGF-β activated kinase 1 (MAP3K7) binding protein 2, TGF-β activated kinase 1/MAP3K7 binding protein 2                                                                                                                                                                                                                                                                                                                                                                                                                                                |
| TBD                            | 2700049M22RIK, A1875481, AU022477, BH3 interacting domain death agonist, cBId, FP497                                                                                                                                                                                                                                                                                                                                                                                                                                                                                                                                                                                                                                                                            |
| Tgfbeta                        | Tgfb, TGF-beta 1, 2, and 3, TGF β, TGF-β 1, 2, and 3, transforming growth factor-β                                                                                                                                                                                                                                                                                                                                                                                                                                                                                                                                                                                                                                                                              |
| Tgfbetarecept                  | TgfbetaR, TGFBR, TGFBR, Tgf β receptor                                                                                                                                                                                                                                                                                                                                                                                                                                                                                                                                                                                                                                                                                                                          |
| TGFBFR1                        | AAT5, ACVRLK4, AL, Aik, ALK-5, AU017191, ESK2, ESS1, LDS1, LDS1A, LDS2A, LOC103690035, LOC666236, MSSE, SKR4, Tbet, Tbeta, TbetaR-I, TBR-I, TGFbeta1R1, TGF-beta1 receptor, TGF beta 1 receptor, TGF-beta-r1, TGF beta receptor type I, TGFbetaR1, Tgfb receptor 1, TGFR-1, TGFβ1R1, TGF β I receptor, TGFβ R1, Tgf-β R1/R4, Tgf-β receptor1, TGF β receptor type I, TGFβR1, TGF β type 1 receptors, Tgf β type I receptors, transforming growth factor beta receptor 1, transforming growth factor, beta receptor 1, transforming growth factor, beta receptor I, transforming growth factor β receptor 1, transforming growth factor, β receptor 1, transforming growth factor, β receptor I, transforming growth factor-β receptor type 1, T β R1            |
| TGFBFR2                        | 1110020H15RIK, AAT3, AU042018, DNIIR, FAA3, LDS1B, LDS2, LDS2B, MFS2, RIIC, RIIDN, TAAD2, Tbet, Tbeta, TbetaR-II, TBR, TBR-II, TBRLL, TGFbeta1R2, TGF-beta 2, Tgf beta2 receptor, TGFbeta R2, TGF-beta receptor 2, TGF-beta receptor type 2, TGF beta receptor type II, TGFbetaR-II, TgfbR2T, TGFβ receptor II, TgfbR2, TGFβ R2, TGFβ R2, TGFβ receptor 2, TGF-β receptor 2, TGF β receptor type 2, TGF β receptor type II, TGFβRII, Tgfβ type II receptor, transforming growth factor beta receptor 2, transforming growth factor, beta receptor 2, transforming growth factor, beta receptor II, transforming growth factor β receptor 2, transforming growth factor, β receptor 2, transforming growth factor, β receptor II, type 2 TGF-β receptors, T β r2 |
| TP53                           | bbi, BCC7, bly, bhy, BMF55, LFS1, p4, p44, p5, P53, P53 cellular tumour antigen, p53 tumor suppressor, transformation related protein 53, TRP53, tumor protein p53, tumour protein p53                                                                                                                                                                                                                                                                                                                                                                                                                                                                                                                                                                          |
| Type I BMP                     | ALK 3,6, ALK 3/6, BMP2 receptor type1, BMP4 receptor type1, Bmpr1, BmprI                                                                                                                                                                                                                                                                                                                                                                                                                                                                                                                                                                                                                                                                                        |
| WNT1                           | BMND16, Int, INT1, O15, sw, swaying, Wg, wingless-type MMTV integration site family, member 1, Wnt-, Wnt family member 1                                                                                                                                                                                                                                                                                                                                                                                                                                                                                                                                                                                                                                        |
| WNT5A                          | 8030457G12RIK, hWNT5A, LOC102724616, wingless-type MMTV integration site family, member 5A, Wnt-, Wnt family member 5A                                                                                                                                                                                                                                                                                                                                                                                                                                                                                                                                                                                                                                          |
| ZBTB17                         | AA589413, Lp1, Miz, MIZ-1, mZ13, pHZ-67, Zfp10, Zfp100, Zinc finger and BTB domain containing 17, ZNF151, ZNF60                                                                                                                                                                                                                                                                                                                                                                                                                                                                                                                                                                                                                                                 |

| Symbol | Synonym(s)                                                                                                                                                                                                                                                                                                                                                                                                                   |
|--------|------------------------------------------------------------------------------------------------------------------------------------------------------------------------------------------------------------------------------------------------------------------------------------------------------------------------------------------------------------------------------------------------------------------------------|
| ACTB   | Act, actin, Actin beta, actin, beta, Actin $\beta$ , actin, $\beta$ , Actx, A-X actin, beta-a, beta-actin, BRWS1, E430023M04Rik, Melanoma x actin, PS1TP5BP1, RBC G-actin, $\beta$ -a, $\beta$ -actin, $\beta$ Ca                                                                                                                                                                                                            |
| AREG   | Amphiregulin, AR, AREGB, CRDGF, Mcub, schwannoma-derived growth factor, Sdg, SDGF                                                                                                                                                                                                                                                                                                                                            |
| CCND1  | A1327039, B-CELL CLL/LYMPHOMA 1, bcl-, BCL1, cD1, CycD1, CYCLIN D1, Cyl-, Cyl-1, D11S287E, G1/S-Specific Cyclin D1, PR, PRAD1, U21B31                                                                                                                                                                                                                                                                                        |
| CCNE1  | AW538188, CCNE, CycE1, CYCLE, cyclin E, Cyclin E1, pCCNE1                                                                                                                                                                                                                                                                                                                                                                    |
| CDKN1A | CAP, CAP20, CDK, CDKI, Cdkn, CDKN1, CDKNA1, Cl, CIP1, cyclin-dependent kinase inhibitor 1A, cyclin-dependent kinase inhibitor 1A (P21), mda, MDA-6, P2, P21, p21C, p21Cip, p21CIP1, p21W, p21WAF, p21Waf1, Pz1 Cyclin-Dependent Kinase Inhibitor, SD, SDI1, UV96, Waf, WAF1                                                                                                                                                  |
| CDKN2A | A, Arf, ARF-INK4a, CDK4I, CDKN2, CMM2, CYCLIN-DEPENDENT KINASE INHIBITOR 2A, INK4, INK4A, INK4a-ARF, Ink4a/Arf, MLM, MTS, MTS-1, p1, p14ARF/ p16INK4a, p16, p16/ARF, p16Cdkn2a, p16l, p16 INK4, p16/INK4a, P19, p19ARF, Pct, PCTR1, TP16                                                                                                                                                                                     |
| CEBPB  | Agp/eb, ANF-1, ANF-2, CCAAT enhancer binding protein beta, CCAAT/enhancer binding protein beta, CCAAT/enhancer binding protein (C/EBP), beta, CCAAT/enhancer binding protein (C/EBP), $\beta$ , CCAAT enhancer-binding protein $\beta$ , CCAAT/enhancer binding protein $\beta$ , C/EBPbe, C/EBP-beta, C/Ebp Beta-Lip, C/EBP- $\beta$ , CEBP- $\beta$ , C/Ebp $\beta$ -Lip, CR, CRP2, IL-6, IL-6DBP, NF-, NF-IL6, NF-M, TCF5 |
| E2F1   | E2f, E2F transcription factor 1, mKIAA4009, RBAP1, RBBP3, RBP3, Tg(Wnt1-cre)2Sor                                                                                                                                                                                                                                                                                                                                             |
| E2F2   | 9230110J10, E2F transcription factor 2                                                                                                                                                                                                                                                                                                                                                                                       |
| E2F3   | E2F transcription factor 3, LOC100361421, LOC691420, RGD1561600                                                                                                                                                                                                                                                                                                                                                              |
| EP400  | 1700020J09Rik, AU023439, CAGH32, E1A binding protein p400, mDo, mDomino, mKIAA1498, NHCP p400, p40, P400, TNRC12                                                                                                                                                                                                                                                                                                             |
| FOXM1  | AA408308, AW554517, BB238854, D1Mgi5, D1Mgi56, Fkh16, FKHL16, FOCM1, forkhead box M1, FOXM1B, HFH-11, HFH-11B, HNF-3, INS-1, MPHOSPH2, Mpm, MPM2, MPP-2, PIG29, Trid, TRIDENT, W, WIN                                                                                                                                                                                                                                        |
| HELLS  | A1323785, E130115I21RIK, helicase, lymphoid specific, Helis helicase, ICF4, L, LSH, Ly, Lysh, Nbla10143, P, PASG, SMARCA6, YFK8                                                                                                                                                                                                                                                                                              |
| LIN9   | 2700022J23Rik, BARA, BARPsv, lin-9 DREAM MuvB core complex component, lin-9 homolog (C. elegans), LOC360888, LOC690072, mLin-9, TGS, TGS1, TGS2                                                                                                                                                                                                                                                                              |
| MXI1   | bHLHc11, Gm10197, LOC100360467, LOC100360898, MAD2, MAXD2, Max inter 1, MAX interactor 1, dimerization protein, MX11, MXD2, MXI, MXI-WR                                                                                                                                                                                                                                                                                      |
| MYC    | AU016757, bHLHe3, bHLHe39, C-MYC-P64, CMYC, mMyc, MRTL, Myc2, MYC proto-oncogene, bHLH transcription factor, MYCC, myelocytomatosis oncogene, N, Niard, Nird, RNCMYC                                                                                                                                                                                                                                                         |
| RABL6  | B230208H17Rik, C9orf86, FLJ10101, PARF, pp8875, RAB, member RAS oncogene family-like 6, Rbe, Rbel, RBEL1, Rbel1a, Rbel1b, RGD1307615                                                                                                                                                                                                                                                                                         |
| RB1    | OSRC, p, p105, p105-Rb, p110 RB, p110-RB1, pp105, pp110, PPP1R130, pRb, R, RB, RB-ASSOCIATED, RB transcriptional corepressor 1, Retinoblastome tumor-suppression protein rb                                                                                                                                                                                                                                                  |
| RBL1   | AW547426, CP107, LOC683869, p10, p107, PRB1, RB transcriptional corepressor like 1                                                                                                                                                                                                                                                                                                                                           |
| RBL2   | p13, P130, PRB2, Rb, Rb2, RB-LIKE protein 2, RBR-2, RB transcriptional corepressor like 2                                                                                                                                                                                                                                                                                                                                    |
| TBX2   | T-box 2, T-box transcription factor 2, THROMBOXANE B2, VETD                                                                                                                                                                                                                                                                                                                                                                  |
| TFDP1  | DILC, Dp, DP-1, Drtf, DRTF1, TB2/DP1, transcription factor Dp-1                                                                                                                                                                                                                                                                                                                                                              |
| TP53   | bbl, BCC7, bfy, bhy, BMFS5, LFS1, p4, p44, p5, P53, P53 cellular tumour antigen, p53 tumor suppressor, transformation related protein 53, TRP53, tumor protein p53, tumour protein p53                                                                                                                                                                                                                                       |

Figure S59. Legend of Figure 8
